# Supplementary material for: Kinetic regulation of kinesin’s two motor domains coordinates its stepping along microtubules
Source: eLife. 2025 Apr 17;14:RP106228. doi: 10.7554/eLife.106228 (PMC12005725; doi:10.7554/eLife.106228)
Supplement: Figure 1—figure supplement 2—source data 1. [file elife-106228-fig1-figsupp2-data1.xlsx]

## Sheet: WT
ATPase	WT	N=3	Fig.1-suppl 2 & Fig.3-suppl 4A
[uM]
MT conc	DTT	Cu	DTT	Cu	DTT	Cu	DTT average	Cu average	DTT sem	Cu sem
0	0.357292	0.1684	0.041556	0.440638	0.0597307	0.206279	0.15286	0.271772	0.102351	0.085138
0.05	8.63826	5.79255	11.2981	9.84204	6.08166	6.7558	8.67267	7.46346	1.50595	1.22136
0.1	15.2839	11.412	16.7921	17.1776	11.8406	11.146	14.6389	13.2452	1.46531	1.9677
0.2	24.5122	20.0309	23.8414	24.937	19.4055	18.6444	22.5864	21.2041	1.60218	1.90888
0.4	35.8925	32.7743	30.8534	33.5824	28.9274	28.4737	31.8911	31.6101	2.07652	1.58547
0.8	46.2344	43.0242	36.2332	39.3353	39.1683	38.858	40.5453	40.4058	2.96806	1.31641
1.6	53.1616	51.8764	40.575	43.4639	47.86	47.5934	47.1989	47.6446	3.64844	2.42861
2.4	57.4593	54.2137	42.544	45.7065	52.5591	52.0122	50.8541	50.6441	4.38926	2.5493

## Sheet: 222 334
ATPase	222/334
MT conc	DTT	Cu	DTT	Cu	DTT	Cu	DTT average	Cu average	DTT sem	Cu sem
0	0.176774	0.130252	0.263895	0.0368634	0.073378	0.237786	0.171349	0.134967	0.0550644	0.0580493
0.05	4.12751	0.789003	6.82451	0.423252	3.67448	0.529667	4.8755	0.580641	0.983241	0.108616
0.1	7.05577	1.13426	10.224	0.397376	8.65127	0.699308	8.64368	0.743648	0.914597	0.213872
0.2	11.3784	1.48544	13.778	0.620545	14.222	1.0063	13.1261	1.03743	0.883216	0.250158
0.4	16.2509	1.98999	16.8963	0.904693	19.0604	1.37045	17.4025	1.42171	0.849613	0.314345
0.8	20.9193	2.38556	19.3128	1.09131	22.3918	1.56087	20.8746	1.67925	0.889111	0.378277
1.6	24.8692	2.83011	21.0499	1.26649	24.7689	1.88358	23.5627	1.99339	1.25672	0.454705
2.4	26.7325	3.01321	21.8092	1.26182	25.5305	1.88077	24.6907	2.05193	1.48196	0.512775

## Sheet: 47 328
ATPase	47/328
MT conc	DTT	Cu	DTT	Cu	DTT	Cu	DTT average	Cu average	DTT sem	Cu sem
0	0.180686	0.142338	0.374774	0.030888	0.227779	0.344117	0.26108	0.172448	0.0584501	0.0916661
0.05	3.28483	0.482971	5.95253	0.789751	3.23771	0.551604	4.15836	0.608109	0.89719	0.0929571
0.1	6.19294	0.57103	9.50394	0.438647	10.1601	0.753605	8.61899	0.587761	1.22773	0.0913046
0.2	10.4906	0.715693	14.424	0.630954	17.1934	0.998338	14.036	0.781662	1.94463	0.111066
0.4	15.6694	0.972345	19.572	0.892098	23.1866	1.19949	19.476	1.02131	2.17056	0.092052
0.8	20.6732	1.14616	24.0805	1.1204	27.3784	1.57327	24.044	1.27994	1.93571	0.146852
1.6	24.8276	1.40382	27.1735	1.11686	30.0319	1.51137	27.3443	1.34402	1.50478	0.117745
2.4	26.7045	1.54946	28.1374	1.06168	31.0001	1.62171	28.614	1.41095	1.26272	0.175876

## Sheet: 4 330
ATPase	4/330
MT2DTT	DTT2	MT2Cu	Cu2	DTT3	CU3	MT1DTT	DTT1	MT1Cu	Cu1	DTT average	DTT sem	Cu average	Cu sem
0	0.501832	0	0.495858	0.29296	0.00702349	0	0.313869	0	0.90828	0.369554	0.066414	0.470387	0.260482
0.05	3.88949	0.05	0.512996	3.77071	0.283713	0.05	7.29614	0.05	0.593551	4.98545	1.15586	0.46342	0.0928138
0.1	6.40986	0.1	0.608929	6.14955	0.527724	0.1	11.4012	0.1	1.12509	7.98687	1.70882	0.753914	0.187062
0.2	9.2294	0.2	0.843744	9.97365	0.644599	0.2	16.6629	0.2	1.42399	11.9553	2.36358	0.970778	0.233785
0.4	13.3	0.4	1.34512	14.095	1.29733	0.4	22.3582	0.4	2.41841	16.5844	2.89601	1.68695	0.365988
0.8	17.8503	0.8	2.80518	19.4241	2.77505	0.8	27.2285	0.8	4.23325	21.501	2.89958	3.27116	0.481124
1.6	22.4221	1.6	4.1348	24.1055	5.23754	1.6	31.5883	1.6	6.71068	26.0386	2.81706	5.36101	0.746151
2.4	24.7092	2.4	7.2286	26.9197	6.92661	2.4	34.2326	2.4	8.85441	28.6205	2.87769	7.66987	0.59865
3.2	26.1845	3.2	8.4902	28.5766	8.42831	3.2	35.7495	3.2	10.0561	30.1702	2.87385	8.99154	0.532581
4.8	28.453	4.8	10.7258	30.8985	11.0047			6.4	15.4566	29.6758	1.22275	10.8652	0.13945
		6.4	13.5051		13.075			9.6	18.9208			14.0122	0.732778
		9.6	16.059		17.0796			12.8	22.2252			17.3531	0.837375
		12.8	18.4238		19.7141							20.121	1.11607

## Sheet: 47 335
ATPase	47/335
MT conc	DTT	Cu	DTT	Cu	DTT	Cu	DTT average	DTT sem	Cu average	Cu sem
0	0.279511	0.134397	0.219713	1.06114	0.0166782	0.121654	0.171967	0.0795403	0.439064	0.31106
0.05	4.54573	3.55318	5.35967	4.91427	5.07867	3.52232	4.99469	0.238687	3.99659	0.458926
0.1	7.60412	5.20611	10.8635	6.4705	12.4383	6.43737	10.302	1.42347	6.03799	0.416052
0.2	12.5486	6.80811	18.0155	8.03268	20.605	8.69714	17.0564	2.37461	7.84598	0.553249
0.4	18.4659	8.12074	26.833	9.75689	28.1809	10.0945	24.4933	3.0387	9.32404	0.609494
0.8	24.7803	9.37119	34.3931	10.7886	34.2058	11.3475	31.1264	3.17351	10.5024	0.588181
1.6	29.7852	10.341	38.8419	10.811	37.7642	11.936	35.4638	2.85628	11.0293	0.473201
2.4	32.4379	10.8538	42.2466	12.2053	39.3518	12.439	38.0121	2.90968	11.8327	0.494078
