# Supplementary material for: Kinetic regulation of kinesin’s two motor domains coordinates its stepping along microtubules
Source: eLife. 2025 Apr 17;14:RP106228. doi: 10.7554/eLife.106228 (PMC12005725; doi:10.7554/eLife.106228)
Supplement: Figure 2—figure supplement 1—source data 1. [file elife-106228-fig2-figsupp1-data1.xlsx]

## Sheet: Sheet1
mantATP binding trace		crosslinking		Fig.2-suppl 1
Time (s)	222/334 DTT	Time (s)	222/334 Cu	Time (s)	47/328 DTT	Time (s)	47/328 Cu
-0.00096	-0.280405	-0.001	-0.114888	-0.001	-0.252354	-0.001	-0.263458
-0.0009	-0.181116	-0.0008	-0.0665313	-0.0009	-0.170483	-0.0009	-0.268955
-0.00084	-0.262654	-0.0006	-0.0367518	-0.0008	-0.163548	-0.0008	-0.276955
-0.00078	-0.0869685	-0.0004	-0.0656292	-0.0007	-0.170945	-0.0007	-0.122685
-0.00072	-0.0752065	-0.0002	-0.0782313	-0.0006	-0.136795	-0.0006	-0.16256
-0.00066	-0.178057	0	5e-07	-0.0005	-0.065068	-0.0005	-0.172734
-0.0006	-0.00632575	0.0002	0.0551385	-0.0004	-0.07103	-0.0004	-0.185745
-0.00054	-0.0248973	0.0004	0.0522315	-0.0003	-0.020897	-0.0003	-0.158813
-0.00048	-0.164636	0.0006	0.0865832	-0.0002	-0.003151	-0.0002	-0.088382
-0.00042	-0.116609	0.0008	0.0593252	-0.0001	-0.034806	-0.0001	-0.008511
-0.00036	-0.0533103	0.001	0.105603	0	-3.33067e-16	0	-1.66533e-16
-0.0003	-0.0437858	0.0012	0.0774677	0.0001	0.083221	0.0001	-0.000111
-0.00024	-0.001265	0.0014	0.148293	0.0002	0.126098	0.0002	-0.003288
-0.00018	0.118484	0.0016	0.120316	0.0003	0.113994	0.0003	-0.073463
-0.00012	0.0395145	0.0018	0.0845557	0.0004	0.119213	0.0004	0.052151
-6e-05	0.04015	0.002	0.154547	0.0005	0.160957	0.0005	-0.014236
0	2.5e-07	0.0022	0.190276	0.0006	0.167133	0.0006	0.018486
6e-05	0.114791	0.0024	0.167363	0.0007	0.248256	0.0007	0.065659
0.00012	0.189667	0.0026	0.165551	0.0008	0.187042	0.0008	-0.002857
0.00018	0.158774	0.0028	0.199349	0.0009	0.237613	0.0009	0.030841
0.00024	0.0582	0.003	0.216367	0.001	0.276252	0.001	0.102997
0.0003	0.196432	0.0032	0.269049	0.0011	0.28997	0.0011	0.091572
0.00036	0.182374	0.0034	0.218528	0.0012	0.212577	0.0012	0.212936
0.00042	0.0963087	0.0036	0.237357	0.0013	0.373905	0.0013	0.128967
0.00048	0.211392	0.0038	0.244741	0.0014	0.363266	0.0014	0.131748
0.00054	0.239036	0.004	0.239194	0.0015	0.379791	0.0015	0.068898
0.0006	0.287469	0.0042	0.292	0.0016	0.398143	0.0016	0.195293
0.00066	0.0789452	0.0044	0.312491	0.0017	0.448638	0.0017	0.25642
0.00072	0.158164	0.0046	0.29777	0.0018	0.431808	0.0018	0.262058
0.00078	0.260385	0.0048	0.301474	0.0019	0.434173	0.0019	0.228806
0.00084	0.234534	0.005	0.307942	0.002	0.36866	0.002	0.288746
0.0009	0.261676	0.0052	0.354527	0.0021	0.45034	0.0021	0.23138
0.00096	0.281779	0.0054	0.363698	0.0022	0.530368	0.0022	0.277886
0.00102	0.355384	0.0056	0.349139	0.0023	0.457637	0.0023	0.177063
0.00108	0.37887	0.0058	0.400735	0.0024	0.564434	0.0024	0.30357
0.00114	0.374921	0.006	0.379943	0.0025	0.479206	0.0025	0.312047
0.0012	0.310192	0.0062	0.39915	0.0026	0.610824	0.0026	0.3619
0.00126	0.375201	0.0064	0.398959	0.0027	0.508262	0.0027	0.340744
0.00132	0.395622	0.0066	0.373082	0.0028	0.583286	0.0028	0.360684
0.00138	0.463486	0.0068	0.408624	0.0029	0.680408	0.0029	0.334992
0.00144	0.393321	0.007	0.433762	0.003	0.713302	0.003	0.338104
0.0015	0.372276	0.0072	0.479292	0.0031	0.797187	0.0031	0.413768
0.00156	0.49167	0.0074	0.392369	0.0032	0.803569	0.0032	0.411964
0.00162	0.402222	0.0076	0.423678	0.0033	0.801448	0.0033	0.397487
0.00168	0.392901	0.0078	0.467231	0.0034	0.792423	0.0034	0.468578
0.00174	0.439618	0.008	0.447449	0.0035	0.791091	0.0035	0.403858
0.0018	0.4953	0.0082	0.455952	0.0036	0.781402	0.0036	0.460148
0.00186	0.387236	0.0084	0.480367	0.0037	0.857822	0.0037	0.471425
0.00192	0.48926	0.0086	0.519891	0.0038	0.792587	0.0038	0.462055
0.00198	0.480487	0.0088	0.483161	0.0039	0.865226	0.0039	0.499641
0.00204	0.530294	0.009	0.465583	0.004	0.823001	0.004	0.506702
0.0021	0.62439	0.0092	0.458209	0.0041	0.831138	0.0041	0.47694
0.00216	0.386804	0.0094	0.449151	0.0042	0.897174	0.0042	0.446888
0.00222	0.513942	0.0096	0.495797	0.0043	0.948005	0.0043	0.489766
0.00228	0.53407	0.0098	0.496955	0.0044	0.887764	0.0044	0.424514
0.00234	0.542959	0.01	0.531394	0.0045	0.933651	0.0045	0.584804
0.0024	0.643915	0.0102	0.467404	0.0046	0.986854	0.0046	0.496643
0.00246	0.520554	0.0104	0.493165	0.0047	0.927265	0.0047	0.47469
0.00252	0.646966	0.0106	0.570967	0.0048	0.945404	0.0048	0.565373
0.00258	0.493622	0.0108	0.555888	0.0049	0.968818	0.0049	0.577389
0.00264	0.547714	0.011	0.56098	0.005	0.948391	0.005	0.556115
0.0027	0.525182	0.0112	0.510213	0.0051	0.979053	0.0051	0.527367
0.00276	0.688191	0.0114	0.503424	0.0052	0.925575	0.0052	0.506343
0.00282	0.676753	0.0116	0.553876	0.0053	0.982334	0.0053	0.532096
0.00288	0.617358	0.0118	0.574912	0.0054	0.987819	0.0054	0.693916
0.00294	0.599149	0.012	0.535914	0.0055	1.01333	0.0055	0.567012
0.003	0.613969	0.0122	0.531001	0.0056	1.01852	0.0056	0.613125
0.00306	0.633011	0.0124	0.57182	0.0057	0.988021	0.0057	0.579155
0.00312	0.805524	0.0126	0.559039	0.0058	1.0751	0.0058	0.566006
0.00318	0.611127	0.0128	0.597007	0.0059	0.95795	0.0059	0.702339
0.00324	0.687885	0.013	0.552589	0.006	1.10952	0.006	0.648228
0.0033	0.7691	0.0132	0.549239	0.0061	1.11564	0.0061	0.652767
0.00336	0.635993	0.0134	0.569377	0.0062	1.02424	0.0062	0.604298
0.00342	0.64045	0.0136	0.608771	0.0063	1.07855	0.0063	0.623497
0.00348	0.67756	0.0138	0.620463	0.0064	1.09544	0.0064	0.735547
0.00354	0.704009	0.014	0.591172	0.0065	1.12764	0.0065	0.714626
0.0036	0.776514	0.0142	0.604403	0.0066	1.15018	0.0066	0.687607
0.00366	0.868505	0.0144	0.599097	0.0067	1.05904	0.0067	0.708634
0.00372	0.698541	0.0146	0.580239	0.0068	1.07084	0.0068	0.683411
0.00378	0.765496	0.0148	0.651213	0.0069	1.14404	0.0069	0.751064
0.00384	0.755876	0.015	0.637353	0.007	1.14466	0.007	0.669556
0.0039	0.815595	0.0152	0.599265	0.0071	1.14791	0.0071	0.724578
0.00396	0.849317	0.0154	0.60916	0.0072	1.14313	0.0072	0.77773
0.00402	0.881621	0.0156	0.645463	0.0073	1.20628	0.0073	0.734039
0.00408	0.698973	0.0158	0.652804	0.0074	1.13935	0.0074	0.743103
0.00414	0.846825	0.016	0.638789	0.0075	1.14162	0.0075	0.716569
0.0042	0.849406	0.0162	0.617886	0.0076	1.1508	0.0076	0.666809
0.00426	0.90292	0.0164	0.637639	0.0077	1.16236	0.0077	0.822578
0.00432	0.967439	0.0166	0.659013	0.0078	1.16699	0.0078	0.864811
0.00438	0.930875	0.0168	0.624787	0.0079	1.1672	0.0079	0.755883
0.00444	0.876166	0.017	0.677161	0.008	1.28936	0.008	0.779083
0.0045	0.869071	0.0172	0.677174	0.0081	1.25383	0.0081	0.765606
0.00456	0.918083	0.0174	0.682281	0.0082	1.16595	0.0082	0.814888
0.00462	0.957883	0.0176	0.661603	0.0083	1.22116	0.0083	0.853085
0.00468	0.824108	0.0178	0.639226	0.0084	1.16006	0.0084	0.878963
0.00474	0.876846	0.018	0.621388	0.0085	1.20276	0.0085	0.791107
0.0048	0.839316	0.0182	0.677258	0.0086	1.17015	0.0086	0.815445
0.00486	0.889785	0.0184	0.665059	0.0087	1.20472	0.0087	0.724186
0.00492	0.925312	0.0186	0.716961	0.0088	1.18075	0.0088	0.846317
0.00498	0.983366	0.0188	0.641766	0.0089	1.30601	0.0089	0.835918
0.00504	0.952797	0.019	0.64219	0.009	1.28033	0.009	0.850365
0.0051	1.02195	0.0192	0.668294	0.0091	1.25368	0.0091	0.862526
0.00516	0.922324	0.0194	0.676968	0.0092	1.27334	0.0092	0.845966
0.00522	0.880477	0.0196	0.678584	0.0093	1.2736	0.0093	0.788681
0.00528	0.865212	0.0198	0.70127	0.0094	1.29518	0.0094	0.844257
0.00534	0.800209	0.02	0.69324	0.0095	1.30247	0.0095	0.929657
0.0054	0.904713	0.0202	0.651782	0.0096	1.26835	0.0096	0.842095
0.00546	0.837917	0.0204	0.686097	0.0097	1.38646	0.0097	0.830562
0.00552	0.873795	0.0206	0.705394	0.0098	1.34236	0.0098	0.843381
0.00558	0.913595	0.0208	0.751025	0.0099	1.29379	0.0099	0.951958
0.00564	0.928765	0.021	0.689273	0.01	1.31398	0.01	0.938202
0.0057	1.02956	0.0212	0.707202	0.0101	1.27024	0.0101	0.901539
0.00576	0.87478	0.0214	0.688456	0.0102	1.28364	0.0102	0.970837
0.00582	0.794233	0.0216	0.718686	0.0103	1.36206	0.0103	0.911785
0.00588	0.949383	0.0218	0.681031	0.0104	1.31707	0.0104	0.970917
0.00594	0.990995	0.022	0.673243	0.0105	1.26024	0.0105	0.953083
0.006	0.972837	0.0222	0.76682	0.0106	1.34606	0.0106	0.958073
0.00606	1.06527	0.0224	0.718028	0.0107	1.35448	0.0107	0.89922
0.00612	0.917587	0.0226	0.710467	0.0108	1.34602	0.0108	0.855988
0.00618	0.962709	0.0228	0.725575	0.0109	1.34611	0.0109	0.921379
0.00624	0.900428	0.023	0.74463	0.011	1.38716	0.011	0.993019
0.0063	1.02853	0.0232	0.715542	0.0111	1.36437	0.0111	0.987553
0.00636	1.01213	0.0234	0.750392	0.0112	1.3658	0.0112	0.889896
0.00642	0.922127	0.0236	0.732846	0.0113	1.43335	0.0113	0.992527
0.00648	0.935975	0.0238	0.732775	0.0114	1.44044	0.0114	0.963928
0.00654	1.05723	0.024	0.733537	0.0115	1.33838	0.0115	0.924992
0.0066	1.00589	0.0242	0.744187	0.0116	1.44739	0.0116	0.95414
0.00666	0.899932	0.0244	0.710791	0.0117	1.44312	0.0117	0.944134
0.00672	1.06436	0.0246	0.692408	0.0118	1.3715	0.0118	1.00312
0.00678	0.866871	0.0248	0.740201	0.0119	1.3423	0.0119	0.960014
0.00684	0.99177	0.025	0.741841	0.012	1.37778	0.012	1.01326
0.0069	0.944138	0.0252	0.77489	0.0121	1.4332	0.0121	1.0161
0.00696	1.04818	0.0254	0.718491	0.0122	1.37764	0.0122	1.06328
0.00702	1.00924	0.0256	0.764533	0.0123	1.40396	0.0123	0.99878
0.00708	1.02991	0.0258	0.790932	0.0124	1.33293	0.0124	1.04411
0.00714	1.03863	0.026	0.775857	0.0125	1.42517	0.0125	1.03212
0.0072	1.04129	0.0262	0.750829	0.0126	1.25861	0.0126	1.04204
0.00726	1.00262	0.0264	0.761815	0.0127	1.39228	0.0127	1.00895
0.00732	0.936152	0.0266	0.746806	0.0128	1.43168	0.0128	1.07283
0.00738	1.10914	0.0268	0.761982	0.0129	1.41868	0.0129	0.981746
0.00744	0.995789	0.027	0.807431	0.013	1.37179	0.013	1.08777
0.0075	0.962137	0.0272	0.763659	0.0131	1.3337	0.0131	0.999039
0.00756	1.00959	0.0274	0.742503	0.0132	1.40695	0.0132	1.03624
0.00762	1.03446	0.0276	0.788051	0.0133	1.40121	0.0133	1.01984
0.00768	1.0581	0.0278	0.79494	0.0134	1.3947	0.0134	1.07938
0.00774	0.897828	0.028	0.770606	0.0135	1.34874	0.0135	0.987335
0.0078	1.00648	0.0282	0.794314	0.0136	1.43306	0.0136	1.06921
0.00786	0.921853	0.0284	0.841797	0.0137	1.38954	0.0137	1.08238
0.00792	1.11633	0.0286	0.822669	0.0138	1.38974	0.0138	1.0335
0.00798	1.17816	0.0288	0.758977	0.0139	1.47422	0.0139	1.001
0.00804	1.18359	0.029	0.768309	0.014	1.43956	0.014	1.09154
0.0081	0.967471	0.0292	0.77576	0.0141	1.40499	0.0141	1.01833
0.00816	1.05579	0.0294	0.77666	0.0142	1.44362	0.0142	1.19418
0.00822	1.0903	0.0296	0.752139	0.0143	1.42807	0.0143	1.11844
0.00828	1.02174	0.0298	0.790158	0.0144	1.47719	0.0144	1.09141
0.00834	0.991643	0.03	0.824236	0.0145	1.44798	0.0145	1.13924
0.0084	1.13941	0.0302	0.755311	0.0146	1.47674	0.0146	1.00827
0.00846	1.00334	0.0304	0.810208	0.0147	1.51024	0.0147	1.06791
0.00852	1.08403	0.0306	0.793092	0.0148	1.5308	0.0148	1.13717
0.00858	1.18727	0.0308	0.786814	0.0149	1.46554	0.0149	1.13457
0.00864	1.03547	0.031	0.817424	0.015	1.52631	0.015	1.03725
0.0087	1.02428	0.0312	0.804496	0.0151	1.37092	0.0151	1.08351
0.00876	1.05154	0.0314	0.825427	0.0152	1.42958	0.0152	1.07547
0.00882	1.00123	0.0316	0.851977	0.0153	1.4536	0.0153	1.08649
0.00888	1.15735	0.0318	0.819941	0.0154	1.43869	0.0154	1.08838
0.00894	1.16433	0.032	0.808505	0.0155	1.49973	0.0155	1.08431
0.009	1.04752	0.0322	0.778098	0.0156	1.44082	0.0156	1.11891
0.00906	1.19513	0.0324	0.784953	0.0157	1.46581	0.0157	1.08271
0.00912	1.21588	0.0326	0.828805	0.0158	1.4597	0.0158	1.08864
0.00918	1.08923	0.0328	0.82105	0.0159	1.47602	0.0159	1.17839
0.00924	1.08477	0.033	0.785197	0.016	1.42674	0.016	1.07351
0.0093	1.02114	0.0332	0.836932	0.0161	1.38531	0.0161	1.15401
0.00936	1.06469	0.0334	0.857094	0.0162	1.51152	0.0162	1.12928
0.00942	1.01002	0.0336	0.795037	0.0163	1.56402	0.0163	1.13374
0.00948	1.13465	0.0338	0.819565	0.0164	1.47506	0.0164	1.07738
0.00954	1.10361	0.034	0.824345	0.0165	1.48298	0.0165	1.07707
0.0096	1.13695	0.0342	0.857361	0.0166	1.44953	0.0166	1.06172
0.00966	0.988516	0.0344	0.821187	0.0167	1.41672	0.0167	1.08314
0.00972	1.1553	0.0346	0.844411	0.0168	1.4359	0.0168	1.10871
0.00978	1.06667	0.0348	0.851769	0.0169	1.3496	0.0169	1.11237
0.00984	1.10694	0.035	0.825967	0.017	1.47461	0.017	1.07727
0.0099	0.967293	0.0352	0.790495	0.0171	1.50347	0.0171	1.10464
0.00996	1.15632	0.0354	0.819943	0.0172	1.44612	0.0172	1.05667
0.01002	1.09556	0.0356	0.832246	0.0173	1.41177	0.0173	1.04045
0.01008	1.07325	0.0358	0.8739	0.0174	1.4514	0.0174	1.24335
0.01014	0.906601	0.036	0.806403	0.0175	1.47154	0.0175	1.01296
0.0102	0.955162	0.0362	0.886237	0.0176	1.45553	0.0176	1.13252
0.01026	1.10434	0.0364	0.873427	0.0177	1.47581	0.0177	1.17351
0.01032	1.1953	0.0366	0.87904	0.0178	1.55771	0.0178	1.11515
0.01038	1.12079	0.0368	0.906726	0.0179	1.46617	0.0179	1.14611
0.01044	1.03254	0.037	0.821267	0.018	1.45256	0.018	1.12775
0.0105	1.05935	0.0372	0.858237	0.0181	1.44139	0.0181	1.22766
0.01056	1.12583	0.0374	0.851962	0.0182	1.53746	0.0182	1.18927
0.01062	1.11228	0.0376	0.858981	0.0183	1.41881	0.0183	1.1326
0.01068	1.06709	0.0378	0.885169	0.0184	1.48546	0.0184	1.16981
0.01074	1.00897	0.038	0.854514	0.0185	1.43215	0.0185	1.1933
0.0108	1.01491	0.0382	0.859292	0.0186	1.51144	0.0186	1.23544
0.01086	1.16791	0.0384	0.845376	0.0187	1.41121	0.0187	1.13306
0.01092	1.12478	0.0386	0.842452	0.0188	1.46175	0.0188	1.15606
0.01098	1.07608	0.0388	0.841391	0.0189	1.47184	0.0189	1.1187
0.01104	1.09617	0.039	0.8896	0.019	1.52418	0.019	1.15745
0.0111	0.998891	0.0392	0.896033	0.0191	1.4967	0.0191	1.22048
0.01116	1.10202	0.0394	0.864754	0.0192	1.46585	0.0192	1.19482
0.01122	1.14647	0.0396	0.870238	0.0193	1.49379	0.0193	1.20006
0.01128	1.15599	0.0398	0.876422	0.0194	1.48614	0.0194	1.18914
0.01134	1.21382	0.04	0.861203	0.0195	1.53436	0.0195	1.17546
0.0114	1.07606	0.0402	0.864331	0.0196	1.45934	0.0196	1.20559
0.01146	1.08255	0.0404	0.953061	0.0197	1.42555	0.0197	1.21365
0.01152	1.11555	0.0406	0.865851	0.0198	1.57365	0.0198	1.15969
0.01158	1.09441	0.0408	0.874102	0.0199	1.48859	0.0199	1.13599
0.01164	1.08274	0.041	0.894416	0.02	1.53071	0.02	1.19125
0.0117	1.13292	0.0412	0.880429	0.0201	1.52246	0.0201	1.2004
0.01176	1.21319	0.0414	0.889962	0.0202	1.54472	0.0202	1.23971
0.01182	1.22548	0.0416	0.880177	0.0203	1.556	0.0203	1.17546
0.01188	1.16467	0.0418	0.903163	0.0204	1.51074	0.0204	1.29676
0.01194	1.19603	0.042	0.864759	0.0205	1.54559	0.0205	1.22452
0.012	1.05356	0.0422	0.893877	0.0206	1.48088	0.0206	1.29376
0.01206	1.11011	0.0424	0.85569	0.0207	1.55874	0.0207	1.14624
0.01212	1.24386	0.0426	0.886548	0.0208	1.527	0.0208	1.1961
0.01218	1.16092	0.0428	0.858882	0.0209	1.45161	0.0209	1.23794
0.01224	1.10087	0.043	0.902522	0.021	1.50298	0.021	1.17269
0.0123	1.0728	0.0432	0.911696	0.0211	1.45528	0.0211	1.29113
0.01236	1.1341	0.0434	0.853518	0.0212	1.44297	0.0212	1.26607
0.01242	1.198	0.0436	0.842038	0.0213	1.52411	0.0213	1.18774
0.01248	1.11282	0.0438	0.879281	0.0214	1.44824	0.0214	1.26326
0.01254	1.08112	0.044	0.938222	0.0215	1.63189	0.0215	1.20694
0.0126	1.12291	0.0442	0.9154	0.0216	1.58413	0.0216	1.20935
0.01266	1.16026	0.0444	0.884612	0.0217	1.52761	0.0217	1.24557
0.01272	1.1477	0.0446	0.883469	0.0218	1.50651	0.0218	1.24751
0.01278	1.14135	0.0448	0.932435	0.0219	1.58314	0.0219	1.23805
0.01284	1.19991	0.045	0.901934	0.022	1.55961	0.022	1.30153
0.0129	1.10343	0.0452	0.910594	0.0221	1.49729	0.0221	1.24032
0.01296	1.14286	0.0454	0.907891	0.0222	1.57623	0.0222	1.21569
0.01302	0.878691	0.0456	0.877242	0.0223	1.56008	0.0223	1.22095
0.01308	1.04764	0.0458	0.905906	0.0224	1.56335	0.0224	1.23618
0.01314	1.10426	0.046	0.881655	0.0225	1.48504	0.0225	1.30027
0.0132	1.17235	0.0462	0.88161	0.0226	1.5066	0.0226	1.32282
0.01326	1.07219	0.0464	0.874612	0.0227	1.61753	0.0227	1.23943
0.01332	1.11436	0.0466	0.949048	0.0228	1.48442	0.0228	1.23458
0.01338	1.19299	0.0468	0.886085	0.0229	1.45075	0.0229	1.28622
0.01344	1.13442	0.047	0.922849	0.023	1.56446	0.023	1.25671
0.0135	1.24257	0.0472	0.934409	0.0231	1.55744	0.0231	1.2214
0.01356	1.0984	0.0474	0.941971	0.0232	1.58862	0.0232	1.22807
0.01362	1.13083	0.0476	0.93501	0.0233	1.53199	0.0233	1.24168
0.01368	1.07332	0.0478	0.905797	0.0234	1.49825	0.0234	1.2508
0.01374	1.15845	0.048	0.930976	0.0235	1.52835	0.0235	1.29929
0.0138	1.24575	0.0482	0.918912	0.0236	1.60095	0.0236	1.19834
0.01386	1.16704	0.0484	0.963702	0.0237	1.55385	0.0237	1.23567
0.01392	1.12752	0.0486	0.869847	0.0238	1.50975	0.0238	1.27016
0.01398	1.13651	0.0488	0.906682	0.0239	1.4918	0.0239	1.27206
0.01404	1.28395	0.049	0.945431	0.024	1.54779	0.024	1.17405
0.0141	1.1633	0.0492	0.914752	0.0241	1.51581	0.0241	1.27166
0.01416	1.22389	0.0494	0.915839	0.0242	1.53108	0.0242	1.31256
0.01422	1.21601	0.0496	0.934634	0.0243	1.49255	0.0243	1.29611
0.01428	1.09761	0.0498	0.932664	0.0244	1.56663	0.0244	1.19264
0.01434	1.07692	0.05	0.949126	0.0245	1.56005	0.0245	1.17711
0.0144	1.17011	0.0502	0.898957	0.0246	1.54277	0.0246	1.31502
0.01446	1.26832	0.0504	0.894019	0.0247	1.55116	0.0247	1.26758
0.01452	1.16151	0.0506	0.9082	0.0248	1.59444	0.0248	1.21663
0.01458	1.15302	0.0508	0.925219	0.0249	1.61796	0.0249	1.25683
0.01464	1.19076	0.051	0.969224	0.025	1.50708	0.025	1.34684
0.0147	1.07861	0.0512	0.921763	0.0251	1.56715	0.0251	1.25293
0.01476	1.20335	0.0514	0.937256	0.0252	1.49989	0.0252	1.21414
0.01482	1.16604	0.0516	0.926366	0.0253	1.52443	0.0253	1.27852
0.01488	1.15334	0.0518	0.922198	0.0254	1.54529	0.0254	1.26645
0.01494	1.19705	0.052	0.889661	0.0255	1.53843	0.0255	1.26525
0.015	1.25415	0.0522	0.933353	0.0256	1.48008	0.0256	1.24284
0.01506	1.14522	0.0524	0.919114	0.0257	1.55132	0.0257	1.29519
0.01512	1.19481	0.0526	0.93657	0.0258	1.57164	0.0258	1.20753
0.01518	1.08283	0.0528	0.972562	0.0259	1.65495	0.0259	1.21367
0.01524	1.18017	0.053	0.945309	0.026	1.53126	0.026	1.174
0.0153	1.14721	0.0532	0.966493	0.0261	1.58207	0.0261	1.19103
0.01536	1.16433	0.0534	0.917304	0.0262	1.43944	0.0262	1.28465
0.01542	1.20459	0.0536	0.961648	0.0263	1.62127	0.0263	1.31305
0.01548	1.20258	0.0538	0.944382	0.0264	1.59281	0.0264	1.31007
0.01554	1.25425	0.054	0.962932	0.0265	1.57753	0.0265	1.325
0.0156	1.2023	0.0542	0.953162	0.0266	1.59984	0.0266	1.31117
0.01566	1.32038	0.0544	0.976773	0.0267	1.60152	0.0267	1.41516
0.01572	1.07388	0.0546	0.992429	0.0268	1.51234	0.0268	1.34834
0.01578	1.16765	0.0548	0.858803	0.0269	1.50477	0.0269	1.29035
0.01584	1.1636	0.055	0.889787	0.027	1.56955	0.027	1.3709
0.0159	1.09036	0.0552	0.895789	0.0271	1.60537	0.0271	1.29211
0.01596	1.28827	0.0554	0.954135	0.0272	1.57523	0.0272	1.25104
0.01602	1.22703	0.0556	0.942231	0.0273	1.6173	0.0273	1.28236
0.01608	1.1286	0.0558	0.928126	0.0274	1.60968	0.0274	1.29049
0.01614	1.16628	0.056	0.910159	0.0275	1.58843	0.0275	1.28806
0.0162	1.2335	0.0562	0.977153	0.0276	1.6408	0.0276	1.2398
0.01626	1.1241	0.0564	0.91632	0.0277	1.59068	0.0277	1.36413
0.01632	1.08508	0.0566	0.970547	0.0278	1.50279	0.0278	1.35173
0.01638	1.10655	0.0568	0.943495	0.0279	1.6043	0.0279	1.28785
0.01644	1.10058	0.057	0.936005	0.028	1.57325	0.028	1.25082
0.0165	1.09493	0.0572	0.954249	0.0281	1.61362	0.0281	1.32053
0.01656	1.23438	0.0574	0.9539	0.0282	1.53614	0.0282	1.29412
0.01662	1.14077	0.0576	0.97005	0.0283	1.58317	0.0283	1.28757
0.01668	1.16615	0.0578	0.974036	0.0284	1.61132	0.0284	1.32806
0.01674	1.14928	0.058	0.959248	0.0285	1.48932	0.0285	1.29527
0.0168	1.19905	0.0582	1.0052	0.0286	1.53605	0.0286	1.3019
0.01686	1.15239	0.0584	0.954564	0.0287	1.62618	0.0287	1.3178
0.01692	1.11877	0.0586	0.979239	0.0288	1.59026	0.0288	1.27621
0.01698	1.18066	0.0588	0.997073	0.0289	1.53871	0.0289	1.29546
0.01704	1.22954	0.059	0.959836	0.029	1.54004	0.029	1.264
0.0171	1.19443	0.0592	0.935073	0.0291	1.59158	0.0291	1.30427
0.01716	1.17114	0.0594	0.990414	0.0292	1.60523	0.0292	1.37249
0.01722	1.21655	0.0596	1.02806	0.0293	1.64533	0.0293	1.40075
0.01728	1.16525	0.0598	0.956832	0.0294	1.59703	0.0294	1.30687
0.01734	1.19984	0.06	0.972753	0.0295	1.52462	0.0295	1.26663
0.0174	1.1942	0.0602	0.973304	0.0296	1.52353	0.0296	1.28426
0.01746	1.15097	0.0604	0.987923	0.0297	1.59326	0.0297	1.28661
0.01752	1.17788	0.0606	0.965426	0.0298	1.55122	0.0298	1.2891
0.01758	1.11715	0.0608	0.964309	0.0299	1.57899	0.0299	1.30938
0.01764	1.27831	0.061	0.919579	0.03	1.56376	0.03	1.28651
0.0177	1.13888	0.0612	0.958549	0.0301	1.61948	0.0301	1.33604
0.01776	1.13323	0.0614	0.965287	0.0302	1.59464	0.0302	1.35549
0.01782	1.18779	0.0616	0.972725	0.0303	1.51201	0.0303	1.44959
0.01788	1.32492	0.0618	0.976333	0.0304	1.54276	0.0304	1.28335
0.01794	1.08886	0.062	0.953179	0.0305	1.52226	0.0305	1.38881
0.018	1.15801	0.0622	1.01741	0.0306	1.59536	0.0306	1.27427
0.01806	1.28121	0.0624	0.955491	0.0307	1.6536	0.0307	1.33406
0.01812	1.25418	0.0626	0.991673	0.0308	1.59607	0.0308	1.29108
0.01818	1.2124	0.0628	0.930154	0.0309	1.56349	0.0309	1.35904
0.01824	1.14265	0.063	1.00584	0.031	1.55992	0.031	1.36273
0.0183	1.19628	0.0632	1.05152	0.0311	1.53036	0.0311	1.29241
0.01836	1.1513	0.0634	0.933259	0.0312	1.51052	0.0312	1.37045
0.01842	1.24009	0.0636	0.95687	0.0313	1.58097	0.0313	1.33409
0.01848	1.21489	0.0638	0.956143	0.0314	1.63613	0.0314	1.37181
0.01854	1.09542	0.064	0.966832	0.0315	1.53965	0.0315	1.38831
0.0186	1.24097	0.0642	0.982585	0.0316	1.64571	0.0316	1.35306
0.01866	1.17231	0.0644	0.96152	0.0317	1.62426	0.0317	1.36581
0.01872	1.16192	0.0646	0.986661	0.0318	1.5342	0.0318	1.32469
0.01878	1.2074	0.0648	0.964511	0.0319	1.67088	0.0319	1.32874
0.01884	1.11805	0.065	0.988128	0.032	1.54682	0.032	1.42259
0.0189	1.1532	0.0652	0.955327	0.0321	1.67382	0.0321	1.36681
0.01896	1.19786	0.0654	0.987821	0.0322	1.58353	0.0322	1.30636
0.01902	1.25866	0.0656	0.999833	0.0323	1.55039	0.0323	1.40628
0.01908	1.10574	0.0658	0.940469	0.0324	1.5178	0.0324	1.41942
0.01914	1.11918	0.066	0.996693	0.0325	1.67755	0.0325	1.36544
0.0192	1.18207	0.0662	1.014	0.0326	1.54123	0.0326	1.36663
0.01926	1.12033	0.0664	1.04462	0.0327	1.61286	0.0327	1.38721
0.01932	1.07899	0.0666	1.00986	0.0328	1.60802	0.0328	1.36979
0.01938	1.20387	0.0668	1.03893	0.0329	1.61956	0.0329	1.39547
0.01944	1.13183	0.067	1.04341	0.033	1.61929	0.033	1.2976
0.0195	1.1414	0.0672	0.993136	0.0331	1.59308	0.0331	1.42457
0.01956	1.27235	0.0674	0.968581	0.0332	1.60179	0.0332	1.45417
0.01962	1.17176	0.0676	0.984252	0.0333	1.59348	0.0333	1.31766
0.01968	1.23976	0.0678	0.940486	0.0334	1.51324	0.0334	1.30533
0.01974	1.13655	0.068	1.00149	0.0335	1.58653	0.0335	1.3822
0.0198	1.13269	0.0682	1.03183	0.0336	1.64937	0.0336	1.34925
0.01986	1.28183	0.0684	0.997735	0.0337	1.62622	0.0337	1.33358
0.01992	1.2326	0.0686	0.99437	0.0338	1.62952	0.0338	1.31603
0.01998	1.16335	0.0688	1.01425	0.0339	1.59974	0.0339	1.37818
0.02004	1.135	0.069	1.01679	0.034	1.55387	0.034	1.36824
0.0201	1.19155	0.0692	0.940827	0.0341	1.54881	0.0341	1.34789
0.02016	1.19047	0.0694	0.970425	0.0342	1.5879	0.0342	1.41949
0.02022	1.15441	0.0696	1.00197	0.0343	1.52196	0.0343	1.35766
0.02028	1.1474	0.0698	1.04424	0.0344	1.54053	0.0344	1.3578
0.02034	1.24357	0.07	1.00716	0.0345	1.55118	0.0345	1.42951
0.0204	1.12439	0.0702	1.01906	0.0346	1.60864	0.0346	1.38661
0.02046	1.25722	0.0704	0.98819	0.0347	1.54066	0.0347	1.32096
0.02052	1.17933	0.0706	1.01522	0.0348	1.57554	0.0348	1.36643
0.02058	1.19269	0.0708	1.00671	0.0349	1.55424	0.0349	1.36836
0.02064	1.20021	0.071	0.998084	0.035	1.58254	0.035	1.37596
0.0207	1.25555	0.0712	0.973338	0.0351	1.59538	0.0351	1.323
0.02076	1.15764	0.0714	0.955239	0.0352	1.73142	0.0352	1.41101
0.02082	1.20743	0.0716	0.98042	0.0353	1.62257	0.0353	1.33619
0.02088	1.16978	0.0718	0.980374	0.0354	1.63274	0.0354	1.39903
0.02094	1.20727	0.072	1.0214	0.0355	1.68387	0.0355	1.48043
0.021	1.17377	0.0722	1.03132	0.0356	1.59534	0.0356	1.40042
0.02106	1.12709	0.0724	0.984282	0.0357	1.63742	0.0357	1.41275
0.02112	1.26021	0.0726	1.03005	0.0358	1.66383	0.0358	1.42498
0.02118	1.10012	0.0728	1.02612	0.0359	1.58713	0.0359	1.426
0.02124	1.21688	0.073	1.04889	0.036	1.61907	0.036	1.42638
0.0213	1.17871	0.0732	1.02581	0.0361	1.56381	0.0361	1.47148
0.02136	1.22458	0.0734	0.987481	0.0362	1.64668	0.0362	1.35378
0.02142	1.10821	0.0736	0.982864	0.0363	1.53106	0.0363	1.42803
0.02148	1.16706	0.0738	0.977847	0.0364	1.47482	0.0364	1.4235
0.02154	1.03547	0.074	1.00456	0.0365	1.59635	0.0365	1.43957
0.0216	1.28986	0.0742	1.03919	0.0366	1.60668	0.0366	1.42309
0.02166	1.27773	0.0744	1.03153	0.0367	1.62049	0.0367	1.38641
0.02172	1.13171	0.0746	1.06548	0.0368	1.57248	0.0368	1.30622
0.02178	1.1732	0.0748	1.01909	0.0369	1.60939	0.0369	1.38848
0.02184	1.25771	0.075	0.9738	0.037	1.58727	0.037	1.31089
0.0219	1.20298	0.0752	1.01495	0.0371	1.64523	0.0371	1.4798
0.02196	1.17457	0.0754	1.02031	0.0372	1.61589	0.0372	1.36903
0.02202	1.10994	0.0756	0.99388	0.0373	1.70322	0.0373	1.32964
0.02208	1.22153	0.0758	0.978522	0.0374	1.61344	0.0374	1.41932
0.02214	1.23263	0.076	0.98986	0.0375	1.60421	0.0375	1.44988
0.0222	1.29199	0.0762	1.0236	0.0376	1.57168	0.0376	1.37833
0.02226	1.21947	0.0764	1.0308	0.0377	1.61833	0.0377	1.3763
0.02232	1.25137	0.0766	1.04096	0.0378	1.65998	0.0378	1.48447
0.02238	1.3571	0.0768	0.973237	0.0379	1.60532	0.0379	1.39101
0.02244	1.13447	0.077	1.05914	0.038	1.71422	0.038	1.37102
0.0225	1.23908	0.0772	1.10449	0.0381	1.67895	0.0381	1.35544
0.02256	1.16763	0.0774	0.969972	0.0382	1.61781	0.0382	1.33074
0.02262	1.12778	0.0776	1.02704	0.0383	1.61659	0.0383	1.35437
0.02268	1.31008	0.0778	0.956912	0.0384	1.43141	0.0384	1.48326
0.02274	1.2381	0.078	0.928683	0.0385	1.63064	0.0385	1.39186
0.0228	1.212	0.0782	1.04432	0.0386	1.64624	0.0386	1.37275
0.02286	1.17247	0.0784	1.00807	0.0387	1.57493	0.0387	1.39938
0.02292	1.23498	0.0786	1.03164	0.0388	1.59796	0.0388	1.38269
0.02298	1.29555	0.0788	1.05875	0.0389	1.6562	0.0389	1.45226
0.02304	1.22652	0.079	1.0333	0.039	1.57233	0.039	1.30934
0.0231	1.22494	0.0792	1.00121	0.0391	1.56444	0.0391	1.47424
0.02316	1.21777	0.0794	0.981887	0.0392	1.54182	0.0392	1.39749
0.02322	1.14402	0.0796	1.03922	0.0393	1.59523	0.0393	1.40931
0.02328	1.13635	0.0798	1.0082	0.0394	1.57857	0.0394	1.43774
0.02334	1.15895	0.08	1.02423	0.0395	1.55501	0.0395	1.42951
0.0234	1.19015	0.0802	0.974042	0.0396	1.4858	0.0396	1.41362
0.02346	1.30432	0.0804	1.02129	0.0397	1.58762	0.0397	1.33336
0.02352	1.20416	0.0806	0.974328	0.0398	1.64415	0.0398	1.3966
0.02358	1.20995	0.0808	1.0087	0.0399	1.54325	0.0399	1.36725
0.02364	1.20501	0.081	1.00159	0.04	1.63072	0.04	1.47387
0.0237	1.18732	0.0812	1.06409	0.0401	1.60167	0.0401	1.34175
0.02376	1.1018	0.0814	1.0499	0.0402	1.59071	0.0402	1.41707
0.02382	1.19082	0.0816	1.02436	0.0403	1.64689	0.0403	1.45416
0.02388	1.18272	0.0818	1.0219	0.0404	1.56942	0.0404	1.32691
0.02394	1.21646	0.082	0.967906	0.0405	1.68594	0.0405	1.35017
0.024	1.11561	0.0822	1.03153	0.0406	1.58311	0.0406	1.41529
0.02406	1.24365	0.0824	1.01601	0.0407	1.62638	0.0407	1.39138
0.02412	1.19374	0.0826	0.988952	0.0408	1.68094	0.0408	1.49478
0.02418	1.28717	0.0828	1.00378	0.0409	1.65937	0.0409	1.32116
0.02424	1.37737	0.083	0.984067	0.041	1.63311	0.041	1.43567
0.0243	1.2184	0.0832	1.03931	0.0411	1.62792	0.0411	1.38647
0.02436	1.28878	0.0834	1.02494	0.0412	1.65966	0.0412	1.4255
0.02442	1.25329	0.0836	1.05068	0.0413	1.52222	0.0413	1.49056
0.02448	1.25469	0.0838	1.00886	0.0414	1.67123	0.0414	1.41211
0.02454	1.23173	0.084	1.07748	0.0415	1.58568	0.0415	1.40891
0.0246	1.22232	0.0842	1.04464	0.0416	1.58211	0.0416	1.38009
0.02466	1.20789	0.0844	1.06153	0.0417	1.60929	0.0417	1.41727
0.02472	1.17704	0.0846	1.01961	0.0418	1.5349	0.0418	1.36468
0.02478	1.18965	0.0848	1.02216	0.0419	1.59716	0.0419	1.36086
0.02484	1.15821	0.085	1.04416	0.042	1.60393	0.042	1.45624
0.0249	1.20168	0.0852	1.00056	0.0421	1.54785	0.0421	1.34601
0.02496	1.11401	0.0854	0.999984	0.0422	1.52674	0.0422	1.42157
0.02502	1.21093	0.0856	0.981347	0.0423	1.54414	0.0423	1.34608
0.02508	1.19131	0.0858	1.02755	0.0424	1.61197	0.0424	1.42833
0.02514	1.07254	0.086	0.999955	0.0425	1.6565	0.0425	1.42421
0.0252	1.28956	0.0862	1.01393	0.0426	1.56357	0.0426	1.50955
0.02526	1.17437	0.0864	1.06678	0.0427	1.68993	0.0427	1.47408
0.02532	1.1263	0.0866	1.08402	0.0428	1.59951	0.0428	1.37761
0.02538	1.29325	0.0868	1.07097	0.0429	1.56415	0.0429	1.36094
0.02544	1.20293	0.087	1.0227	0.043	1.52583	0.043	1.41431
0.0255	1.2362	0.0872	1.06221	0.0431	1.52549	0.0431	1.43173
0.02556	1.27244	0.0874	1.05696	0.0432	1.68231	0.0432	1.48303
0.02562	1.10495	0.0876	1.03634	0.0433	1.61528	0.0433	1.3292
0.02568	1.17996	0.0878	0.991439	0.0434	1.65213	0.0434	1.4305
0.02574	1.33157	0.088	1.01062	0.0435	1.53235	0.0435	1.38433
0.0258	1.16694	0.0882	1.05052	0.0436	1.59609	0.0436	1.3101
0.02586	1.16635	0.0884	1.04523	0.0437	1.59358	0.0437	1.34086
0.02592	1.0776	0.0886	0.986935	0.0438	1.6568	0.0438	1.40631
0.02598	1.04536	0.0888	1.01752	0.0439	1.6277	0.0439	1.3578
0.02604	1.27024	0.089	1.06785	0.044	1.55681	0.044	1.37698
0.0261	1.15753	0.0892	1.06159	0.0441	1.57572	0.0441	1.4005
0.02616	1.09454	0.0894	1.03544	0.0442	1.68481	0.0442	1.3428
0.02622	1.20265	0.0896	1.01855	0.0443	1.67588	0.0443	1.48805
0.02628	1.19021	0.0898	1.01638	0.0444	1.63922	0.0444	1.39035
0.02634	1.22182	0.09	0.992123	0.0445	1.52748	0.0445	1.43195
0.0264	1.27782	0.0902	1.08041	0.0446	1.56433	0.0446	1.42165
0.02646	1.2157	0.0904	1.02372	0.0447	1.67065	0.0447	1.41381
0.02652	1.24301	0.0906	1.00404	0.0448	1.65862	0.0448	1.5193
0.02658	1.15095	0.0908	1.07686	0.0449	1.60214	0.0449	1.43112
0.02664	1.16715	0.091	1.0383	0.045	1.716	0.045	1.41067
0.0267	1.09852	0.0912	1.03557	0.0451	1.59907	0.0451	1.32811
0.02676	1.14695	0.0914	1.03584	0.0452	1.56089	0.0452	1.51722
0.02682	1.17807	0.0916	1.01685	0.0453	1.72262	0.0453	1.4631
0.02688	1.06469	0.0918	1.06222	0.0454	1.65105	0.0454	1.45304
0.02694	1.16277	0.092	0.994725	0.0455	1.62936	0.0455	1.41369
0.027	1.16688	0.0922	1.01728	0.0456	1.58184	0.0456	1.39418
0.02706	1.1795	0.0924	1.04323	0.0457	1.57861	0.0457	1.39698
0.02712	1.23705	0.0926	1.0735	0.0458	1.57211	0.0458	1.44171
0.02718	1.30913	0.0928	1.00821	0.0459	1.52945	0.0459	1.46172
0.02724	1.26646	0.093	1.07163	0.046	1.687	0.046	1.40195
0.0273	1.18529	0.0932	1.04258	0.0461	1.61544	0.0461	1.35908
0.02736	1.13661	0.0934	1.05353	0.0462	1.62942	0.0462	1.42758
0.02742	1.02819	0.0936	1.04319	0.0463	1.64341	0.0463	1.39382
0.02748	1.2644	0.0938	1.08847	0.0464	1.50177	0.0464	1.37294
0.02754	1.21443	0.094	1.03328	0.0465	1.63452	0.0465	1.46717
0.0276	1.12282	0.0942	1.05715	0.0466	1.56426	0.0466	1.40335
0.02766	1.11089	0.0944	1.06221	0.0467	1.58885	0.0467	1.41546
0.02772	1.18357	0.0946	1.01938	0.0468	1.60569	0.0468	1.41329
0.02778	1.08365	0.0948	1.03728	0.0469	1.62246	0.0469	1.39814
0.02784	1.23464	0.095	1.02211	0.047	1.62337	0.047	1.39004
0.0279	1.27817	0.0952	1.02958	0.0471	1.66858	0.0471	1.36167
0.02796	1.19613	0.0954	1.03539	0.0472	1.59299	0.0472	1.38278
0.02802	1.09624	0.0956	1.0039	0.0473	1.61293	0.0473	1.42808
0.02808	1.09925	0.0958	1.04635	0.0474	1.66795	0.0474	1.45183
0.02814	1.22524	0.096	1.0119	0.0475	1.67612	0.0475	1.45315
0.0282	1.16248	0.0962	1.03344	0.0476	1.63274	0.0476	1.41183
0.02826	1.10326	0.0964	1.0492	0.0477	1.64608	0.0477	1.51385
0.02832	1.24083	0.0966	1.02918	0.0478	1.59435	0.0478	1.43386
0.02838	1.12937	0.0968	1.01068	0.0479	1.53314	0.0479	1.39322
0.02844	1.25236	0.097	1.01195	0.048	1.62809	0.048	1.43124
0.0285	1.16488	0.0972	1.00809	0.0481	1.64433	0.0481	1.37049
0.02856	1.19386	0.0974	0.95699	0.0482	1.68768	0.0482	1.43618
0.02862	1.21281	0.0976	0.975058	0.0483	1.60316	0.0483	1.54415
0.02868	1.15923	0.0978	1.0267	0.0484	1.58624	0.0484	1.43048
0.02874	1.28497	0.098	1.10773	0.0485	1.56946	0.0485	1.39792
0.0288	1.24098	0.0982	1.03288	0.0486	1.60234	0.0486	1.40668
0.02886	1.14594	0.0984	1.02118	0.0487	1.63386	0.0487	1.54533
0.02892	1.15077	0.0986	1.05538	0.0488	1.63761	0.0488	1.46904
0.02898	1.07139	0.0988	1.06571	0.0489	1.55582	0.0489	1.47028
0.02904	1.24184	0.099	1.0657	0.049	1.65004	0.049	1.38753
0.0291	1.20276	0.0992	1.05568	0.0491	1.56897	0.0491	1.45798
0.02916	1.16294	0.0994	1.01294	0.0492	1.63989	0.0492	1.3955
0.02922	1.03881	0.0996	1.03535	0.0493	1.54456	0.0493	1.53756
0.02928	1.08816	0.0998	1.00465	0.0494	1.55182	0.0494	1.40737
0.02934	1.15654	0.1	1.04507	0.0495	1.57736	0.0495	1.40801
0.0294	1.24073	0.1002	1.04751	0.0496	1.53545	0.0496	1.42438
0.02946	1.15805	0.1004	0.995828	0.0497	1.54507	0.0497	1.48673
0.02952	1.16563	0.1006	1.05445	0.0498	1.62356	0.0498	1.48304
0.02958	1.14201	0.1008	1.09238	0.0499	1.5761	0.0499	1.45286
0.02964	1.16047	0.101	1.07437	0.05	1.69141	0.05	1.46096
0.0297	1.19526	0.1012	1.02273	0.0501	1.58664	0.0501	1.49747
0.02976	1.10106	0.1014	1.06616	0.0502	1.62022	0.0502	1.45652
0.02982	1.14486	0.1016	1.04949	0.0503	1.61681	0.0503	1.42358
0.02988	1.18794	0.1018	1.03808	0.0504	1.57261	0.0504	1.46402
0.02994	1.19915	0.102	1.03899	0.0505	1.63332	0.0505	1.4868
0.03	1.32193	0.1022	1.05776	0.0506	1.62659	0.0506	1.46566
0.03006	1.16433	0.1024	1.06294	0.0507	1.58902	0.0507	1.42405
0.03012	1.11517	0.1026	1.05372	0.0508	1.62706	0.0508	1.53634
0.03018	1.31464	0.1028	1.03819	0.0509	1.61666	0.0509	1.4668
0.03024	1.26399	0.103	1.05437	0.051	1.64963	0.051	1.49776
0.0303	1.2001	0.1032	1.04998	0.0511	1.55294	0.0511	1.3918
0.03036	1.19865	0.1034	1.06268	0.0512	1.63105	0.0512	1.40303
0.03042	1.1857	0.1036	1.04737	0.0513	1.55181	0.0513	1.48503
0.03048	1.27333	0.1038	1.04038	0.0514	1.61582	0.0514	1.44624
0.03054	1.14932	0.104	1.05358	0.0515	1.63407	0.0515	1.50589
0.0306	1.20381	0.1042	1.03567	0.0516	1.63672	0.0516	1.5124
0.03066	1.20349	0.1044	1.0321	0.0517	1.59934	0.0517	1.46108
0.03072	1.37018	0.1046	1.07168	0.0518	1.55307	0.0518	1.48178
0.03078	1.12313	0.1048	1.07815	0.0519	1.52349	0.0519	1.43738
0.03084	1.13446	0.105	1.03046	0.052	1.65584	0.052	1.43277
0.0309	1.41257	0.1052	1.08367	0.0521	1.55639	0.0521	1.39529
0.03096	1.26783	0.1054	1.07797	0.0522	1.62593	0.0522	1.42101
0.03102	1.10826	0.1056	1.05519	0.0523	1.6722	0.0523	1.48041
0.03108	1.21543	0.1058	1.07963	0.0524	1.63456	0.0524	1.51205
0.03114	1.16765	0.106	1.08561	0.0525	1.56925	0.0525	1.42331
0.0312	1.19259	0.1062	1.02523	0.0526	1.59373	0.0526	1.45497
0.03126	1.22227	0.1064	1.01286	0.0527	1.64135	0.0527	1.49085
0.03132	1.14094	0.1066	1.04961	0.0528	1.55958	0.0528	1.55118
0.03138	1.19427	0.1068	1.0758	0.0529	1.6604	0.0529	1.46409
0.03144	1.24161	0.107	1.06178	0.053	1.59631	0.053	1.45378
0.0315	1.14471	0.1072	1.06213	0.0531	1.59342	0.0531	1.49513
0.03156	1.09694	0.1074	1.05465	0.0532	1.57596	0.0532	1.48838
0.03162	1.28216	0.1076	1.01814	0.0533	1.6208	0.0533	1.52759
0.03168	1.1786	0.1078	1.13775	0.0534	1.54753	0.0534	1.39653
0.03174	1.18841	0.108	1.05989	0.0535	1.6539	0.0535	1.45873
0.0318	1.30157	0.1082	1.09935	0.0536	1.60532	0.0536	1.57004
0.03186	1.23521	0.1084	1.05911	0.0537	1.61563	0.0537	1.4329
0.03192	1.19396	0.1086	1.06541	0.0538	1.66304	0.0538	1.48336
0.03198	1.22702	0.1088	1.04345	0.0539	1.63205	0.0539	1.53285
0.03204	0.997633	0.109	1.08651	0.054	1.6075	0.054	1.49551
0.0321	1.2122	0.1092	1.04452	0.0541	1.70232	0.0541	1.413
0.03216	1.22955	0.1094	1.09762	0.0542	1.63367	0.0542	1.47372
0.03222	1.29304	0.1096	1.09235	0.0543	1.68102	0.0543	1.42887
0.03228	1.08493	0.1098	1.02969	0.0544	1.63739	0.0544	1.51635
0.03234	1.10757	0.11	0.985797	0.0545	1.59323	0.0545	1.45473
0.0324	1.33206	0.1102	1.08963	0.0546	1.62121	0.0546	1.53148
0.03246	1.16367	0.1104	1.03569	0.0547	1.59604	0.0547	1.46829
0.03252	1.16407	0.1106	1.01697	0.0548	1.53773	0.0548	1.46218
0.03258	1.20474	0.1108	0.976882	0.0549	1.67815	0.0549	1.45175
0.03264	1.2217	0.111	1.04779	0.055	1.59575	0.055	1.53835
0.0327	1.15603	0.1112	0.987979	0.0551	1.53113	0.0551	1.38009
0.03276	1.24834	0.1114	1.0698	0.0552	1.62836	0.0552	1.41759
0.03282	1.09208	0.1116	1.05962	0.0553	1.61	0.0553	1.44821
0.03288	1.11936	0.1118	1.04094	0.0554	1.66766	0.0554	1.4625
0.03294	1.24232	0.112	1.03897	0.0555	1.66487	0.0555	1.46231
0.033	1.03919	0.1122	1.04744	0.0556	1.63593	0.0556	1.4582
0.03306	1.17627	0.1124	1.08491	0.0557	1.56383	0.0557	1.559
0.03312	1.30276	0.1126	1.05297	0.0558	1.56305	0.0558	1.50171
0.03318	1.18998	0.1128	1.03469	0.0559	1.66378	0.0559	1.39402
0.03324	1.20665	0.113	1.06427	0.056	1.57365	0.056	1.40051
0.0333	1.10957	0.1132	1.08628	0.0561	1.62381	0.0561	1.30831
0.03336	1.22311	0.1134	1.06151	0.0562	1.68534	0.0562	1.49
0.03342	1.18616	0.1136	1.03413	0.0563	1.60077	0.0563	1.42229
0.03348	1.183	0.1138	1.06896	0.0564	1.58203	0.0564	1.4468
0.03354	1.2096	0.114	1.05236	0.0565	1.60409	0.0565	1.43642
0.0336	1.25621	0.1142	1.0538	0.0566	1.53333	0.0566	1.39307
0.03366	1.1841	0.1144	1.04762	0.0567	1.60768	0.0567	1.44287
0.03372	1.29951	0.1146	1.07596	0.0568	1.57254	0.0568	1.46444
0.03378	1.03567	0.1148	1.08649	0.0569	1.61079	0.0569	1.46039
0.03384	1.20686	0.115	1.10307	0.057	1.5829	0.057	1.53354
0.0339	1.26047	0.1152	1.02576	0.0571	1.61363	0.0571	1.49279
0.03396	1.32769	0.1154	1.08702	0.0572	1.58576	0.0572	1.48737
0.03402	1.24317	0.1156	1.03612	0.0573	1.5877	0.0573	1.4859
0.03408	1.23713	0.1158	1.07961	0.0574	1.53585	0.0574	1.40868
0.03414	1.15089	0.116	1.01403	0.0575	1.64358	0.0575	1.49975
0.0342	1.22498	0.1162	1.05705	0.0576	1.63427	0.0576	1.45192
0.03426	1.14288	0.1164	1.04405	0.0577	1.64084	0.0577	1.49576
0.03432	1.21374	0.1166	1.05948	0.0578	1.6464	0.0578	1.42688
0.03438	1.23278	0.1168	1.05024	0.0579	1.60753	0.0579	1.44314
0.03444	1.22379	0.117	1.0739	0.058	1.65161	0.058	1.40442
0.0345	1.14192	0.1172	1.08196	0.0581	1.51747	0.0581	1.45545
0.03456	1.26036	0.1174	1.05389	0.0582	1.6286	0.0582	1.49671
0.03462	1.23236	0.1176	1.06418	0.0583	1.53939	0.0583	1.4842
0.03468	1.25095	0.1178	1.08025	0.0584	1.57037	0.0584	1.45799
0.03474	1.25624	0.118	1.06561	0.0585	1.60895	0.0585	1.40567
0.0348	1.1359	0.1182	1.04795	0.0586	1.62296	0.0586	1.41499
0.03486	1.16508	0.1184	1.10865	0.0587	1.57738	0.0587	1.4436
0.03492	1.10139	0.1186	1.08013	0.0588	1.60329	0.0588	1.52475
0.03498	1.25211	0.1188	1.09681	0.0589	1.64512	0.0589	1.50043
0.03504	1.24801	0.119	1.05289	0.059	1.60452	0.059	1.3703
0.0351	1.17941	0.1192	1.05611	0.0591	1.61965	0.0591	1.51564
0.03516	1.17385	0.1194	1.0398	0.0592	1.57199	0.0592	1.46499
0.03522	1.11046	0.1196	1.09014	0.0593	1.58432	0.0593	1.41771
0.03528	1.26041	0.1198	1.03954	0.0594	1.60259	0.0594	1.54387
0.03534	1.23308	0.12	1.02663	0.0595	1.56373	0.0595	1.4399
0.0354	1.25122	0.1202	1.10787	0.0596	1.59658	0.0596	1.49723
0.03546	1.18572	0.1204	1.09926	0.0597	1.59871	0.0597	1.40696
0.03552	1.25561	0.1206	1.01584	0.0598	1.65974	0.0598	1.39096
0.03558	1.2723	0.1208	1.00506	0.0599	1.56148	0.0599	1.46859
0.03564	1.19312	0.121	1.09122	0.06	1.5474	0.06	1.43586
0.0357	1.29563	0.1212	1.09372	0.0601	1.58081	0.0601	1.44879
0.03576	1.1862	0.1214	1.04088	0.0602	1.61385	0.0602	1.30097
0.03582	1.22281	0.1216	1.09197	0.0603	1.58555	0.0603	1.39715
0.03588	1.27811	0.1218	1.09528	0.0604	1.60516	0.0604	1.45322
0.03594	1.25528	0.122	1.06722	0.0605	1.60156	0.0605	1.56469
0.036	1.11133	0.1222	1.0329	0.0606	1.67081	0.0606	1.44317
0.03606	1.21987	0.1224	1.07419	0.0607	1.57991	0.0607	1.47888
0.03612	1.30543	0.1226	1.1074	0.0608	1.59159	0.0608	1.46323
0.03618	1.3448	0.1228	1.04313	0.0609	1.63619	0.0609	1.43605
0.03624	1.21497	0.123	0.996241	0.061	1.61895	0.061	1.40066
0.0363	1.17994	0.1232	1.04533	0.0611	1.56696	0.0611	1.46756
0.03636	1.20604	0.1234	1.04491	0.0612	1.62346	0.0612	1.52329
0.03642	1.23255	0.1236	1.11123	0.0613	1.59132	0.0613	1.46601
0.03648	1.16927	0.1238	1.07327	0.0614	1.5666	0.0614	1.44562
0.03654	1.05178	0.124	1.10706	0.0615	1.64323	0.0615	1.59304
0.0366	1.1178	0.1242	1.07793	0.0616	1.55546	0.0616	1.48959
0.03666	1.23743	0.1244	1.11162	0.0617	1.64061	0.0617	1.42489
0.03672	1.19761	0.1246	1.01106	0.0618	1.55646	0.0618	1.49374
0.03678	1.31205	0.1248	1.03799	0.0619	1.57105	0.0619	1.45359
0.03684	1.27876	0.125	1.07548	0.062	1.59877	0.062	1.43376
0.0369	1.13041	0.1252	1.0664	0.0621	1.69586	0.0621	1.50139
0.03696	1.26453	0.1254	1.12211	0.0622	1.56086	0.0622	1.52317
0.03702	1.19923	0.1256	1.09779	0.0623	1.56254	0.0623	1.34192
0.03708	1.25366	0.1258	1.04957	0.0624	1.64073	0.0624	1.57405
0.03714	1.26335	0.126	1.04997	0.0625	1.63411	0.0625	1.53652
0.0372	1.16549	0.1262	1.05535	0.0626	1.54636	0.0626	1.42965
0.03726	1.27942	0.1264	0.991839	0.0627	1.57563	0.0627	1.47506
0.03732	1.12281	0.1266	1.10574	0.0628	1.54138	0.0628	1.44473
0.03738	1.11814	0.1268	1.08271	0.0629	1.69847	0.0629	1.51849
0.03744	1.20601	0.127	1.06255	0.063	1.69947	0.063	1.48678
0.0375	1.19178	0.1272	1.06574	0.0631	1.58328	0.0631	1.44391
0.03756	1.13684	0.1274	1.06975	0.0632	1.60887	0.0632	1.46262
0.03762	1.22269	0.1276	1.10535	0.0633	1.58138	0.0633	1.49214
0.03768	1.19827	0.1278	1.09995	0.0634	1.57865	0.0634	1.54438
0.03774	1.20673	0.128	1.06994	0.0635	1.54226	0.0635	1.40944
0.0378	1.25774	0.1282	1.0479	0.0636	1.63752	0.0636	1.56871
0.03786	1.12787	0.1284	1.10646	0.0637	1.59402	0.0637	1.493
0.03792	1.11545	0.1286	1.07017	0.0638	1.61507	0.0638	1.43575
0.03798	1.11752	0.1288	1.06756	0.0639	1.58743	0.0639	1.50554
0.03804	1.13176	0.129	1.08606	0.064	1.61406	0.064	1.48853
0.0381	1.18362	0.1292	1.04529	0.0641	1.55249	0.0641	1.5234
0.03816	1.14331	0.1294	1.05816	0.0642	1.48153	0.0642	1.47346
0.03822	1.22747	0.1296	1.05123	0.0643	1.61843	0.0643	1.5128
0.03828	1.28414	0.1298	1.10083	0.0644	1.59689	0.0644	1.45506
0.03834	1.23501	0.13	1.10598	0.0645	1.63555	0.0645	1.50763
0.0384	1.34708	0.1302	1.07066	0.0646	1.58531	0.0646	1.43841
0.03846	1.28398	0.1304	1.06068	0.0647	1.58374	0.0647	1.48158
0.03852	1.27991	0.1306	1.05553	0.0648	1.537	0.0648	1.56107
0.03858	1.13194	0.1308	1.04471	0.0649	1.55924	0.0649	1.4947
0.03864	1.20943	0.131	1.06156	0.065	1.70192	0.065	1.43423
0.0387	1.28832	0.1312	1.06411	0.0651	1.50463	0.0651	1.42406
0.03876	1.1981	0.1314	1.0204	0.0652	1.52739	0.0652	1.47711
0.03882	1.23108	0.1316	1.04047	0.0653	1.63082	0.0653	1.51045
0.03888	1.2506	0.1318	1.03413	0.0654	1.58693	0.0654	1.45075
0.03894	1.29253	0.132	1.00426	0.0655	1.61205	0.0655	1.44886
0.039	1.19143	0.1322	1.05045	0.0656	1.58134	0.0656	1.39676
0.03906	1.24418	0.1324	1.05754	0.0657	1.45851	0.0657	1.51656
0.03912	1.19598	0.1326	0.999532	0.0658	1.58291	0.0658	1.38942
0.03918	1.27309	0.1328	1.04452	0.0659	1.63982	0.0659	1.5074
0.03924	1.13611	0.133	1.04554	0.066	1.64052	0.066	1.40568
0.0393	1.13146	0.1332	1.0127	0.0661	1.48429	0.0661	1.44991
0.03936	1.03272	0.1334	1.05847	0.0662	1.63171	0.0662	1.49107
0.03942	1.2729	0.1336	1.09946	0.0663	1.5515	0.0663	1.46233
0.03948	1.26536	0.1338	1.04333	0.0664	1.52003	0.0664	1.48301
0.03954	1.26291	0.134	1.08685	0.0665	1.61025	0.0665	1.48172
0.0396	1.23865	0.1342	1.0527	0.0666	1.58865	0.0666	1.42839
0.03966	1.25689	0.1344	1.05684	0.0667	1.55332	0.0667	1.59494
0.03972	1.11388	0.1346	1.07965	0.0668	1.55163	0.0668	1.39587
0.03978	1.20611	0.1348	1.0838	0.0669	1.57842	0.0669	1.46702
0.03984	1.13136	0.135	1.09988	0.067	1.61141	0.067	1.47964
0.0399	1.19369	0.1352	1.10111	0.0671	1.55432	0.0671	1.48886
0.03996	1.11919	0.1354	1.04346	0.0672	1.6078	0.0672	1.52586
0.04002	1.25783	0.1356	1.03196	0.0673	1.63544	0.0673	1.44123
0.04008	1.24949	0.1358	1.05293	0.0674	1.55528	0.0674	1.51838
0.04014	1.13815	0.136	1.08878	0.0675	1.53448	0.0675	1.40935
0.0402	1.2395	0.1362	1.08735	0.0676	1.58704	0.0676	1.46416
0.04026	1.36649	0.1364	1.09111	0.0677	1.55214	0.0677	1.55153
0.04032	1.20736	0.1366	1.07146	0.0678	1.61688	0.0678	1.38795
0.04038	1.19608	0.1368	1.06443	0.0679	1.63133	0.0679	1.42126
0.04044	1.20164	0.137	1.04577	0.068	1.58711	0.068	1.4014
0.0405	1.21954	0.1372	1.06959	0.0681	1.61632	0.0681	1.47323
0.04056	1.09348	0.1374	1.10479	0.0682	1.57975	0.0682	1.43229
0.04062	1.25135	0.1376	1.09134	0.0683	1.63893	0.0683	1.41389
0.04068	1.21163	0.1378	1.05119	0.0684	1.68568	0.0684	1.49136
0.04074	1.21186	0.138	1.05191	0.0685	1.58385	0.0685	1.4813
0.0408	1.19686	0.1382	1.09154	0.0686	1.63734	0.0686	1.45301
0.04086	1.27532	0.1384	1.05956	0.0687	1.56883	0.0687	1.50122
0.04092	1.30192	0.1386	1.04996	0.0688	1.59135	0.0688	1.5416
0.04098	1.18181	0.1388	1.07234	0.0689	1.59824	0.0689	1.41825
0.04104	1.15747	0.139	1.06075	0.069	1.59738	0.069	1.48125
0.0411	1.22832	0.1392	0.973884	0.0691	1.61004	0.0691	1.53515
0.04116	1.07915	0.1394	1.0447	0.0692	1.49409	0.0692	1.43662
0.04122	1.20037	0.1396	1.04913	0.0693	1.60135	0.0693	1.44527
0.04128	1.27223	0.1398	1.04583	0.0694	1.51981	0.0694	1.58679
0.04134	1.15727	0.14	1.06816	0.0695	1.60915	0.0695	1.48059
0.0414	1.2326	0.1402	1.09032	0.0696	1.5555	0.0696	1.51866
0.04146	1.2532	0.1404	1.06795	0.0697	1.56416	0.0697	1.4755
0.04152	1.2792	0.1406	1.08535	0.0698	1.54521	0.0698	1.45421
0.04158	1.12549	0.1408	1.05682	0.0699	1.64823	0.0699	1.48766
0.04164	1.29508	0.141	1.0668	0.07	1.60018	0.07	1.47407
0.0417	1.21397	0.1412	1.09539	0.0701	1.51741	0.0701	1.52847
0.04176	1.16393	0.1414	1.06941	0.0702	1.57766	0.0702	1.43841
0.04182	1.27303	0.1416	1.04646	0.0703	1.53305	0.0703	1.4679
0.04188	1.24901	0.1418	1.0866	0.0704	1.66363	0.0704	1.49411
0.04194	1.08421	0.142	1.04558	0.0705	1.62799	0.0705	1.52536
0.042	1.13991	0.1422	1.06436	0.0706	1.71438	0.0706	1.42841
0.04206	1.21957	0.1424	1.03258	0.0707	1.54679	0.0707	1.46897
0.04212	1.22962	0.1426	1.11518	0.0708	1.48314	0.0708	1.54581
0.04218	1.29561	0.1428	1.11768	0.0709	1.6108	0.0709	1.48345
0.04224	1.25806	0.143	1.08001	0.071	1.59344	0.071	1.44648
0.0423	1.21267	0.1432	1.05786	0.0711	1.52762	0.0711	1.44356
0.04236	1.22995	0.1434	1.06764	0.0712	1.61603	0.0712	1.55214
0.04242	1.26468	0.1436	1.07542	0.0713	1.54318	0.0713	1.54012
0.04248	1.22942	0.1438	1.05844	0.0714	1.51446	0.0714	1.43482
0.04254	1.29522	0.144	1.11474	0.0715	1.57741	0.0715	1.53243
0.0426	1.20284	0.1442	1.10411	0.0716	1.50885	0.0716	1.45625
0.04266	1.22563	0.1444	1.12409	0.0717	1.59754	0.0717	1.46311
0.04272	1.21075	0.1446	0.986073	0.0718	1.63173	0.0718	1.45476
0.04278	1.20429	0.1448	1.06063	0.0719	1.61038	0.0719	1.43416
0.04284	1.14571	0.145	1.09737	0.072	1.64512	0.072	1.44954
0.0429	1.25478	0.1452	1.09924	0.0721	1.58834	0.0721	1.43553
0.04296	1.15481	0.1454	1.04977	0.0722	1.64117	0.0722	1.54594
0.04302	1.10195	0.1456	1.07393	0.0723	1.69554	0.0723	1.44817
0.04308	1.15671	0.1458	1.08292	0.0724	1.54741	0.0724	1.50231
0.04314	1.23447	0.146	1.0765	0.0725	1.49384	0.0725	1.41832
0.0432	1.20537	0.1462	1.0169	0.0726	1.50473	0.0726	1.43156
0.04326	1.16	0.1464	1.05705	0.0727	1.6109	0.0727	1.54844
0.04332	1.12008	0.1466	1.03564	0.0728	1.51287	0.0728	1.39887
0.04338	1.29052	0.1468	1.05771	0.0729	1.49963	0.0729	1.49317
0.04344	1.19101	0.147	1.06523	0.073	1.56001	0.073	1.44488
0.0435	1.18231	0.1472	1.12255	0.0731	1.53914	0.0731	1.55288
0.04356	1.24635	0.1474	1.04821	0.0732	1.69337	0.0732	1.48885
0.04362	1.20473	0.1476	1.07064	0.0733	1.64277	0.0733	1.49714
0.04368	1.1232	0.1478	1.09104	0.0734	1.59337	0.0734	1.44853
0.04374	1.12897	0.148	1.1111	0.0735	1.63229	0.0735	1.46631
0.0438	1.21847	0.1482	1.07565	0.0736	1.5263	0.0736	1.51163
0.04386	1.20283	0.1484	1.06359	0.0737	1.57623	0.0737	1.4919
0.04392	1.11566	0.1486	1.0695	0.0738	1.50793	0.0738	1.46396
0.04398	1.17018	0.1488	1.06253	0.0739	1.50973	0.0739	1.54721
0.04404	1.25874	0.149	1.07807	0.074	1.5754	0.074	1.44937
0.0441	1.16648	0.1492	1.03191	0.0741	1.66368	0.0741	1.46845
0.04416	1.24957	0.1494	0.981623	0.0742	1.6285	0.0742	1.45298
0.04422	1.20736	0.1496	1.03053	0.0743	1.64037	0.0743	1.42819
0.04428	1.23868	0.1498	1.09225	0.0744	1.57376	0.0744	1.57688
0.04434	1.12165	0.15	1.019	0.0745	1.59703	0.0745	1.43828
0.0444	1.20204	0.1502	1.06667	0.0746	1.66007	0.0746	1.47741
0.04446	1.21565	0.1504	1.06959	0.0747	1.52319	0.0747	1.50857
0.04452	1.20082	0.1506	1.07277	0.0748	1.66967	0.0748	1.50371
0.04458	1.15685	0.1508	1.05094	0.0749	1.58318	0.0749	1.48134
0.04464	1.22128	0.151	1.09086	0.075	1.54516	0.075	1.49451
0.0447	1.12866	0.1512	1.04868	0.0751	1.54249	0.0751	1.48193
0.04476	1.1927	0.1514	1.01645	0.0752	1.59294	0.0752	1.38217
0.04482	1.20979	0.1516	1.04856	0.0753	1.55895	0.0753	1.44143
0.04488	1.0944	0.1518	1.11515	0.0754	1.56468	0.0754	1.48124
0.04494	1.28103	0.152	1.06308	0.0755	1.56377	0.0755	1.53531
0.045	1.20286	0.1522	1.05063	0.0756	1.5979	0.0756	1.44937
0.04506	1.19836	0.1524	1.03353	0.0757	1.61884	0.0757	1.50296
0.04512	1.28202	0.1526	1.0515	0.0758	1.58414	0.0758	1.44526
0.04518	1.26408	0.1528	1.04929	0.0759	1.5965	0.0759	1.40939
0.04524	1.15824	0.153	1.05908	0.076	1.56763	0.076	1.44149
0.0453	1.19726	0.1532	1.10571	0.0761	1.57238	0.0761	1.5156
0.04536	1.26428	0.1534	1.0845	0.0762	1.58559	0.0762	1.4756
0.04542	1.17572	0.1536	1.0807	0.0763	1.60499	0.0763	1.49933
0.04548	1.29304	0.1538	1.05566	0.0764	1.48345	0.0764	1.47706
0.04554	1.15902	0.154	1.06603	0.0765	1.5275	0.0765	1.47773
0.0456	1.27869	0.1542	1.05527	0.0766	1.46719	0.0766	1.42301
0.04566	1.2454	0.1544	1.05944	0.0767	1.56046	0.0767	1.50383
0.04572	1.27319	0.1546	1.05477	0.0768	1.58882	0.0768	1.44103
0.04578	1.22393	0.1548	1.03991	0.0769	1.54727	0.0769	1.42705
0.04584	1.12923	0.155	1.06861	0.077	1.56176	0.077	1.36987
0.0459	1.27804	0.1552	1.04566	0.0771	1.67365	0.0771	1.51311
0.04596	1.28387	0.1554	1.06377	0.0772	1.55273	0.0772	1.4411
0.04602	1.28522	0.1556	1.04074	0.0773	1.52648	0.0773	1.4406
0.04608	1.28094	0.1558	1.07148	0.0774	1.59228	0.0774	1.49193
0.04614	1.13974	0.156	1.06679	0.0775	1.54515	0.0775	1.55398
0.0462	1.14853	0.1562	1.05755	0.0776	1.55405	0.0776	1.42642
0.04626	1.16222	0.1564	1.09964	0.0777	1.58297	0.0777	1.52762
0.04632	1.2291	0.1566	1.06168	0.0778	1.64957	0.0778	1.40678
0.04638	1.16653	0.1568	1.07976	0.0779	1.61652	0.0779	1.50899
0.04644	1.15351	0.157	1.04377	0.078	1.5948	0.078	1.43315
0.0465	1.12804	0.1572	1.02272	0.0781	1.5063	0.0781	1.532
0.04656	1.17397	0.1574	1.09214	0.0782	1.51772	0.0782	1.44377
0.04662	1.16084	0.1576	1.02849	0.0783	1.54785	0.0783	1.50257
0.04668	1.19644	0.1578	1.05455	0.0784	1.55029	0.0784	1.54544
0.04674	1.25016	0.158	1.09988	0.0785	1.59887	0.0785	1.43175
0.0468	1.21523	0.1582	1.03801	0.0786	1.57566	0.0786	1.44473
0.04686	1.23105	0.1584	1.05648	0.0787	1.5188	0.0787	1.52608
0.04692	1.2147	0.1586	1.03561	0.0788	1.51427	0.0788	1.52723
0.04698	1.11817	0.1588	1.05755	0.0789	1.56777	0.0789	1.44334
0.04704	1.32125	0.159	1.03501	0.079	1.54669	0.079	1.57548
0.0471	1.25313	0.1592	1.07227	0.0791	1.56861	0.0791	1.51684
0.04716	1.23442	0.1594	1.03423	0.0792	1.59054	0.0792	1.45195
0.04722	1.19466	0.1596	1.05528	0.0793	1.63809	0.0793	1.48111
0.04728	1.21103	0.1598	1.06769	0.0794	1.54855	0.0794	1.4508
0.04734	1.22405	0.16	1.07887	0.0795	1.54872	0.0795	1.48878
0.0474	1.25444	0.1602	1.05177	0.0796	1.60883	0.0796	1.6301
0.04746	1.28105	0.1604	1.05578	0.0797	1.48357	0.0797	1.52251
0.04752	1.23829	0.1606	1.09555	0.0798	1.56702	0.0798	1.45502
0.04758	1.17337	0.1608	1.09169	0.0799	1.61874	0.0799	1.53563
0.04764	1.27059	0.161	1.0748	0.08	1.5787	0.08	1.43933
0.0477	1.36635	0.1612	1.06229	0.0801	1.57822	0.0801	1.51001
0.04776	1.16968	0.1614	1.09882	0.0802	1.56776	0.0802	1.42114
0.04782	1.16392	0.1616	1.07856	0.0803	1.60018	0.0803	1.5032
0.04788	1.17399	0.1618	1.05598	0.0804	1.65374	0.0804	1.4056
0.04794	1.19518	0.162	1.04399	0.0805	1.48239	0.0805	1.46619
0.048	1.2248	0.1622	1.06004	0.0806	1.56836	0.0806	1.4292
0.04806	1.17319	0.1624	1.09778	0.0807	1.59826	0.0807	1.53666
0.04812	1.2346	0.1626	1.06383	0.0808	1.57095	0.0808	1.48472
0.04818	1.16179	0.1628	1.06834	0.0809	1.59822	0.0809	1.47337
0.04824	1.15643	0.163	1.07202	0.081	1.52853	0.081	1.47293
0.0483	1.22416	0.1632	1.04593	0.0811	1.58437	0.0811	1.46713
0.04836	1.27249	0.1634	1.12419	0.0812	1.60467	0.0812	1.47018
0.04842	1.04281	0.1636	1.12523	0.0813	1.61851	0.0813	1.45647
0.04848	1.19822	0.1638	1.04831	0.0814	1.52836	0.0814	1.5615
0.04854	1.11115	0.164	1.0378	0.0815	1.6075	0.0815	1.45603
0.0486	1.19238	0.1642	1.11726	0.0816	1.64756	0.0816	1.59832
0.04866	1.24418	0.1644	1.018	0.0817	1.53489	0.0817	1.43666
0.04872	1.29575	0.1646	1.09647	0.0818	1.53552	0.0818	1.46998
0.04878	1.33574	0.1648	1.03711	0.0819	1.54163	0.0819	1.53527
0.04884	1.25438	0.165	1.03591	0.082	1.49782	0.082	1.5286
0.0489	1.17762	0.1652	1.02759	0.0821	1.53288	0.0821	1.43008
0.04896	1.25204	0.1654	0.989609	0.0822	1.56881	0.0822	1.51929
0.04902	1.19671	0.1656	1.04853	0.0823	1.56486	0.0823	1.54448
0.04908	1.20988	0.1658	1.04374	0.0824	1.52759	0.0824	1.46785
0.04914	1.2334	0.166	1.01617	0.0825	1.62393	0.0825	1.45987
0.0492	1.24816	0.1662	1.07471	0.0826	1.51277	0.0826	1.45389
0.04926	1.28844	0.1664	1.08362	0.0827	1.55655	0.0827	1.52275
0.04932	1.12633	0.1666	1.0986	0.0828	1.5212	0.0828	1.4564
0.04938	1.22157	0.1668	1.07792	0.0829	1.4521	0.0829	1.52282
0.04944	1.23366	0.167	1.04421	0.083	1.54065	0.083	1.46216
0.0495	1.18998	0.1672	1.08782	0.0831	1.5628	0.0831	1.48299
0.04956	1.2092	0.1674	1.06459	0.0832	1.47895	0.0832	1.47084
0.04962	1.28422	0.1676	1.07425	0.0833	1.60982	0.0833	1.46507
0.04968	1.17456	0.1678	1.06372	0.0834	1.61557	0.0834	1.53075
0.04974	1.10537	0.168	1.06207	0.0835	1.4499	0.0835	1.45039
0.0498	1.21904	0.1682	1.09253	0.0836	1.60065	0.0836	1.50235
0.04986	1.20838	0.1684	1.04063	0.0837	1.55643	0.0837	1.51929
0.04992	1.14088	0.1686	1.04782	0.0838	1.57405	0.0838	1.5441
0.04998	1.29117	0.1688	1.06344	0.0839	1.66877	0.0839	1.52197
0.05004	1.13064	0.169	1.04574	0.084	1.58221	0.084	1.46405
0.0501	1.23652	0.1692	1.04007	0.0841	1.54661	0.0841	1.45305
0.05016	1.16925	0.1694	1.05415	0.0842	1.57077	0.0842	1.50602
0.05022	1.10718	0.1696	1.09039	0.0843	1.65846	0.0843	1.56556
0.05028	1.12774	0.1698	1.0008	0.0844	1.58652	0.0844	1.50674
0.05034	1.14023	0.17	1.05467	0.0845	1.67597	0.0845	1.42413
0.0504	1.12811	0.1702	1.05383	0.0846	1.53885	0.0846	1.49609
0.05046	1.35366	0.1704	1.01966	0.0847	1.62248	0.0847	1.48542
0.05052	1.17533	0.1706	1.02508	0.0848	1.60433	0.0848	1.52948
0.05058	1.14203	0.1708	1.07343	0.0849	1.53473	0.0849	1.49057
0.05064	1.17804	0.171	0.982154	0.085	1.54113	0.085	1.46276
0.0507	1.30035	0.1712	1.04853	0.0851	1.49502	0.0851	1.50339
0.05076	1.18983	0.1714	1.0745	0.0852	1.55072	0.0852	1.51162
0.05082	1.24827	0.1716	1.00486	0.0853	1.54886	0.0853	1.49825
0.05088	1.22335	0.1718	1.05242	0.0854	1.5778	0.0854	1.54447
0.05094	1.30847	0.172	1.08194	0.0855	1.4942	0.0855	1.46385
0.051	1.2599	0.1722	1.06717	0.0856	1.49813	0.0856	1.48253
0.05106	1.17641	0.1724	1.08465	0.0857	1.62204	0.0857	1.52774
0.05112	1.18569	0.1726	1.08502	0.0858	1.58053	0.0858	1.43919
0.05118	1.19468	0.1728	1.06846	0.0859	1.54712	0.0859	1.42667
0.05124	1.32707	0.173	1.09069	0.086	1.55645	0.086	1.47563
0.0513	1.34499	0.1732	1.05827	0.0861	1.527	0.0861	1.53329
0.05136	1.15268	0.1734	1.07041	0.0862	1.5667	0.0862	1.49024
0.05142	1.08123	0.1736	1.01838	0.0863	1.5402	0.0863	1.47696
0.05148	1.12296	0.1738	1.05249	0.0864	1.55286	0.0864	1.43518
0.05154	1.17346	0.174	1.06002	0.0865	1.58227	0.0865	1.50932
0.0516	1.30875	0.1742	1.03407	0.0866	1.48544	0.0866	1.51342
0.05166	1.21183	0.1744	1.05461	0.0867	1.55428	0.0867	1.47368
0.05172	1.15929	0.1746	1.10947	0.0868	1.61541	0.0868	1.50076
0.05178	1.12893	0.1748	1.0066	0.0869	1.57165	0.0869	1.49187
0.05184	1.16662	0.175	0.989045	0.087	1.54604	0.087	1.49789
0.0519	1.24776	0.1752	1.05529	0.0871	1.57201	0.0871	1.46201
0.05196	1.17996	0.1754	1.05991	0.0872	1.51469	0.0872	1.48883
0.05202	1.16487	0.1756	1.04694	0.0873	1.54821	0.0873	1.48233
0.05208	1.19136	0.1758	1.01762	0.0874	1.55715	0.0874	1.50038
0.05214	1.15831	0.176	1.05547	0.0875	1.61871	0.0875	1.43974
0.0522	1.21552	0.1762	1.11413	0.0876	1.6505	0.0876	1.43483
0.05226	1.24147	0.1764	1.04085	0.0877	1.55844	0.0877	1.45376
0.05232	1.0747	0.1766	1.07091	0.0878	1.56934	0.0878	1.51165
0.05238	1.18285	0.1768	1.04652	0.0879	1.50382	0.0879	1.49782
0.05244	1.21425	0.177	1.06984	0.088	1.48455	0.088	1.50425
0.0525	1.23457	0.1772	1.07511	0.0881	1.51509	0.0881	1.46226
0.05256	1.23477	0.1774	1.05103	0.0882	1.62789	0.0882	1.4926
0.05262	1.1275	0.1776	1.12893	0.0883	1.65124	0.0883	1.60476
0.05268	1.22768	0.1778	1.08104	0.0884	1.56112	0.0884	1.51533
0.05274	1.21038	0.178	1.02532	0.0885	1.57848	0.0885	1.57944
0.0528	1.18392	0.1782	1.03185	0.0886	1.58707	0.0886	1.50241
0.05286	1.25078	0.1784	1.08765	0.0887	1.60865	0.0887	1.47902
0.05292	1.34942	0.1786	1.00197	0.0888	1.54	0.0888	1.54277
0.05298	1.22483	0.1788	1.02477	0.0889	1.62301	0.0889	1.46844
0.05304	1.2689	0.179	1.09249	0.089	1.59975	0.089	1.47939
0.0531	1.36443	0.1792	1.0578	0.0891	1.56906	0.0891	1.47836
0.05316	1.14431	0.1794	1.02082	0.0892	1.50291	0.0892	1.46267
0.05322	1.09796	0.1796	1.06918	0.0893	1.53394	0.0893	1.42079
0.05328	1.17312	0.1798	1.06982	0.0894	1.55687	0.0894	1.54662
0.05334	1.21011	0.18	1.07342	0.0895	1.65338	0.0895	1.54331
0.0534	1.16136	0.1802	1.03438	0.0896	1.5921	0.0896	1.56893
0.05346	1.20586	0.1804	1.07915	0.0897	1.57573	0.0897	1.47953
0.05352	1.15508	0.1806	1.07004	0.0898	1.62355	0.0898	1.42921
0.05358	1.20345	0.1808	1.06351	0.0899	1.58068	0.0899	1.4675
0.05364	1.02987	0.181	1.08027	0.09	1.56407	0.09	1.50762
0.0537	1.21654	0.1812	1.0437	0.0901	1.52833	0.0901	1.47193
0.05376	1.30585	0.1814	1.05744	0.0902	1.66907	0.0902	1.39599
0.05382	1.29622	0.1816	1.04954	0.0903	1.49304	0.0903	1.54835
0.05388	1.21293	0.1818	1.05717	0.0904	1.54611	0.0904	1.54942
0.05394	1.11918	0.182	1.07143	0.0905	1.51831	0.0905	1.5383
0.054	1.19745	0.1822	1.03508	0.0906	1.58961	0.0906	1.49631
0.05406	1.20995	0.1824	1.07564	0.0907	1.6427	0.0907	1.42576
0.05412	1.2081	0.1826	1.1098	0.0908	1.5593	0.0908	1.43436
0.05418	1.1419	0.1828	1.00919	0.0909	1.63106	0.0909	1.52312
0.05424	1.21748	0.183	1.00477	0.091	1.53427	0.091	1.50031
0.0543	1.26115	0.1832	1.05327	0.0911	1.56697	0.0911	1.54502
0.05436	1.17963	0.1834	1.03262	0.0912	1.6579	0.0912	1.56848
0.05442	1.18383	0.1836	1.0312	0.0913	1.59482	0.0913	1.49226
0.05448	1.25113	0.1838	1.00654	0.0914	1.62865	0.0914	1.39982
0.05454	1.24851	0.184	1.04487	0.0915	1.49774	0.0915	1.49206
0.0546	1.33501	0.1842	1.03518	0.0916	1.61507	0.0916	1.52472
0.05466	1.17507	0.1844	1.05165	0.0917	1.55348	0.0917	1.4797
0.05472	1.18327	0.1846	1.0321	0.0918	1.5571	0.0918	1.58398
0.05478	1.27466	0.1848	1.04885	0.0919	1.55733	0.0919	1.54129
0.05484	1.30295	0.185	1.06891	0.092	1.51862	0.092	1.5387
0.0549	1.16088	0.1852	1.02738	0.0921	1.52493	0.0921	1.47071
0.05496	1.14879	0.1854	1.05483	0.0922	1.64518	0.0922	1.47302
0.05502	1.27316	0.1856	1.03341	0.0923	1.59686	0.0923	1.4859
0.05508	1.25847	0.1858	1.03176	0.0924	1.54663	0.0924	1.57398
0.05514	1.21198	0.186	1.0565	0.0925	1.61336	0.0925	1.46942
0.0552	1.2169	0.1862	1.04345	0.0926	1.56753	0.0926	1.47775
0.05526	1.22999	0.1864	1.06264	0.0927	1.53396	0.0927	1.54899
0.05532	1.13232	0.1866	1.05617	0.0928	1.63729	0.0928	1.55838
0.05538	1.28911	0.1868	1.07848	0.0929	1.53627	0.0929	1.47205
0.05544	1.18645	0.187	1.05989	0.093	1.53065	0.093	1.54647
0.0555	1.22618	0.1872	1.08897	0.0931	1.52643	0.0931	1.54102
0.05556	1.18017	0.1874	1.05583	0.0932	1.48755	0.0932	1.50783
0.05562	1.1298	0.1876	1.01572	0.0933	1.5701	0.0933	1.44973
0.05568	1.21714	0.1878	1.05197	0.0934	1.60474	0.0934	1.54763
0.05574	1.19856	0.188	1.09564	0.0935	1.52462	0.0935	1.57149
0.0558	1.2065	0.1882	1.05424	0.0936	1.52959	0.0936	1.47063
0.05586	1.22484	0.1884	0.995373	0.0937	1.59129	0.0937	1.4396
0.05592	1.25738	0.1886	1.07608	0.0938	1.56434	0.0938	1.56942
0.05598	1.07146	0.1888	1.05352	0.0939	1.62484	0.0939	1.40543
0.05604	1.21166	0.189	0.98681	0.094	1.54472	0.094	1.54695
0.0561	1.27384	0.1892	1.05263	0.0941	1.58865	0.0941	1.49618
0.05616	1.2838	0.1894	1.03473	0.0942	1.51511	0.0942	1.51659
0.05622	1.17072	0.1896	1.06829	0.0943	1.5716	0.0943	1.52779
0.05628	1.19369	0.1898	1.05891	0.0944	1.54903	0.0944	1.54603
0.05634	1.12544	0.19	1.04596	0.0945	1.51158	0.0945	1.44585
0.0564	1.28822	0.1902	1.02212	0.0946	1.54923	0.0946	1.466
0.05646	1.14866	0.1904	1.00726	0.0947	1.55542	0.0947	1.45571
0.05652	1.29615	0.1906	1.03066	0.0948	1.61105	0.0948	1.56814
0.05658	1.13219	0.1908	1.06947	0.0949	1.49026	0.0949	1.51963
0.05664	1.27406	0.191	0.998665	0.095	1.5457	0.095	1.46753
0.0567	1.13226	0.1912	1.06994	0.0951	1.55314	0.0951	1.51145
0.05676	1.17637	0.1914	1.07032	0.0952	1.5764	0.0952	1.53686
0.05682	1.26607	0.1916	1.06843	0.0953	1.53992	0.0953	1.54889
0.05688	1.14649	0.1918	1.0595	0.0954	1.5756	0.0954	1.46654
0.05694	1.20686	0.192	1.06709	0.0955	1.64712	0.0955	1.46405
0.057	1.2379	0.1922	1.00723	0.0956	1.56963	0.0956	1.45063
0.05706	1.28737	0.1924	1.06617	0.0957	1.53291	0.0957	1.52064
0.05712	1.13857	0.1926	1.06361	0.0958	1.55723	0.0958	1.52878
0.05718	1.23451	0.1928	1.10606	0.0959	1.58789	0.0959	1.50239
0.05724	1.16962	0.193	1.11244	0.096	1.64527	0.096	1.43857
0.0573	1.27991	0.1932	1.04655	0.0961	1.51389	0.0961	1.5275
0.05736	1.21312	0.1934	1.09052	0.0962	1.5289	0.0962	1.43739
0.05742	1.17978	0.1936	1.0175	0.0963	1.5951	0.0963	1.51109
0.05748	1.28263	0.1938	1.00643	0.0964	1.48305	0.0964	1.47408
0.05754	1.08013	0.194	1.01304	0.0965	1.5401	0.0965	1.46962
0.0576	1.18559	0.1942	1.00089	0.0966	1.53604	0.0966	1.45811
0.05766	1.23861	0.1944	1.0636	0.0967	1.46187	0.0967	1.45443
0.05772	1.06913	0.1946	1.05718	0.0968	1.54567	0.0968	1.42101
0.05778	1.20878	0.1948	1.06593	0.0969	1.58364	0.0969	1.4391
0.05784	1.27743	0.195	1.09301	0.097	1.55937	0.097	1.5356
0.0579	1.19678	0.1952	1.0553	0.0971	1.52973	0.0971	1.38735
0.05796	1.23039	0.1954	1.08465	0.0972	1.53015	0.0972	1.50032
0.05802	1.20686	0.1956	1.04451	0.0973	1.54541	0.0973	1.54784
0.05808	1.16723	0.1958	1.0646	0.0974	1.58662	0.0974	1.53614
0.05814	1.24636	0.196	1.10342	0.0975	1.53945	0.0975	1.51709
0.0582	1.16665	0.1962	1.04345	0.0976	1.414	0.0976	1.56533
0.05826	1.20282	0.1964	1.10625	0.0977	1.57938	0.0977	1.55808
0.05832	1.26567	0.1966	1.03472	0.0978	1.44277	0.0978	1.55953
0.05838	1.30685	0.1968	1.01905	0.0979	1.53108	0.0979	1.49032
0.05844	1.26759	0.197	1.03437	0.098	1.53828	0.098	1.44725
0.0585	1.06404	0.1972	1.08618	0.0981	1.53139	0.0981	1.54018
0.05856	1.19822	0.1974	1.02386	0.0982	1.64084	0.0982	1.50629
0.05862	1.27686	0.1976	1.06461	0.0983	1.56515	0.0983	1.5138
0.05868	1.22461	0.1978	1.03186	0.0984	1.52915	0.0984	1.39872
0.05874	1.28135	0.198	1.07881	0.0985	1.64661	0.0985	1.45319
0.0588	1.19474	0.1982	1.00671	0.0986	1.5316	0.0986	1.48363
0.05886	1.22268	0.1984	1.03264	0.0987	1.60348	0.0987	1.41619
0.05892	1.33235	0.1986	1.06551	0.0988	1.6256	0.0988	1.45472
0.05898	1.31084	0.1988	1.06654	0.0989	1.48445	0.0989	1.47906
