# Supplementary material for: Kinetic regulation of kinesin’s two motor domains coordinates its stepping along microtubules
Source: eLife. 2025 Apr 17;14:RP106228. doi: 10.7554/eLife.106228 (PMC12005725; doi:10.7554/eLife.106228)
Supplement: Figure 2—figure supplement 2—source data 1. [file elife-106228-fig2-figsupp2-data1.xlsx]

## Sheet: WT ATP
mantATP binding trace		WT & E236A monomer		Fig.2-suppl 2A
Time (s)	Fl1	Fl2	Fl3	Fl4
0.0001	4.62993	4.82378	4.48642	4.59966
0.0002	4.74398	4.81472	4.47175	4.6111
0.0003	4.76146	4.84653	4.61689	4.52935
0.0004	4.63167	5.00744	4.61492	4.59479
0.0005	4.70282	4.96889	4.62075	4.60994
0.0006	4.7855	4.9181	4.63398	4.57023
0.0007	4.80652	4.93776	4.58638	4.74732
0.0008	4.87629	5.13582	4.7842	4.75974
0.0009	4.9254	5.12771	4.74411	4.86132
0.001	4.95319	5.18439	4.79885	4.81247
0.0011	4.89051	5.16274	4.85869	4.83948
0.0012	4.92359	5.15616	4.88183	4.8696
0.0013	4.99036	5.16701	4.90723	4.94852
0.0014	5.11736	5.26198	4.97704	4.91305
0.0015	5.13225	5.15757	4.95006	4.96824
0.0016	5.08333	5.25502	4.97757	4.93615
0.0017	5.13665	5.39196	4.95557	4.97106
0.0018	5.11264	5.30448	5.1039	5.02521
0.0019	5.24993	5.44076	5.12131	5.13074
0.002	5.19671	5.35351	5.14625	5.13942
0.0021	5.30466	5.27836	5.14109	5.1592
0.0022	5.35608	5.46923	5.03638	5.24076
0.0023	5.2851	5.47292	5.15728	5.28533
0.0024	5.32576	5.54577	5.15371	5.26987
0.0025	5.39585	5.57061	5.17043	5.23188
0.0026	5.35169	5.64513	5.28696	5.18667
0.0027	5.49099	5.58414	5.34623	5.26958
0.0028	5.383	5.52782	5.38688	5.31208
0.0029	5.45975	5.56412	5.2931	5.39585
0.003	5.44297	5.56813	5.36139	5.38318
0.0031	5.53928	5.53826	5.3798	5.50657
0.0032	5.57171	5.78508	5.35737	5.48359
0.0033	5.55266	5.63401	5.39229	5.44727
0.0034	5.66425	5.65122	5.48943	5.45298
0.0035	5.59975	5.67525	5.49939	5.43096
0.0036	5.58765	5.6511	5.41956	5.51323
0.0037	5.52182	5.63858	5.44068	5.57697
0.0038	5.61068	5.73284	5.50916	5.4775
0.0039	5.6009	5.82111	5.57428	5.543
0.004	5.64875	5.88378	5.47921	5.44373
0.0041	5.5909	5.78801	5.52401	5.47037
0.0042	5.62655	5.70722	5.54906	5.43844
0.0043	5.62207	5.86611	5.53686	5.58727
0.0044	5.57947	5.85213	5.49836	5.51253
0.0045	5.63144	5.81209	5.58571	5.51911
0.0046	5.75158	5.74547	5.66532	5.5339
0.0047	5.68845	5.76172	5.52668	5.59322
0.0048	5.67127	5.92344	5.58082	5.73421
0.0049	5.78116	5.93863	5.54415	5.55503
0.005	5.8196	5.99639	5.68256	5.65792
0.0051	5.68627	5.98729	5.70627	5.56578
0.0052	5.66787	5.95713	5.75164	5.69449
0.0053	5.83301	5.86773	5.745	5.61391
0.0054	5.60778	5.93056	5.74471	5.70815
0.0055	5.81705	5.96604	5.76336	5.64866
0.0056	5.80697	6.00553	5.71174	5.68638
0.0057	5.78115	6.03702	5.84119	5.60915
0.0058	5.97178	5.99067	5.66538	5.71668
0.0059	5.86326	5.99528	5.70731	5.76121
0.006	5.89026	5.93833	5.85395	5.74245
0.0061	5.85651	6.11118	5.82953	5.76799
0.0062	5.76455	6.03893	5.75946	5.74987
0.0063	5.77216	6.0985	5.77781	5.65273
0.0064	5.77935	6.12919	5.7632	5.83457
0.0065	5.85143	6.21537	5.79096	5.80092
0.0066	5.8032	6.13671	5.87676	5.80036
0.0067	5.94719	6.10021	5.77221	5.81458
0.0068	5.93303	6.181	5.79558	5.85755
0.0069	5.97681	6.01027	5.81238	5.81037
0.007	5.87253	5.98874	5.88627	5.83538
0.0071	6.00007	6.0422	6.06194	5.81807
0.0072	5.93192	6.15323	5.76178	5.79233
0.0073	6.00541	6.10415	5.91399	5.79935
0.0074	5.9267	6.14577	5.89304	5.88741
0.0075	6.02488	6.06499	5.88688	5.81253
0.0076	5.96396	6.10979	5.86799	5.8145
0.0077	6.0271	6.09907	5.94581	5.82456
0.0078	5.9598	6.09131	5.95957	5.90101
0.0079	5.90653	6.16053	5.96521	5.83901
0.008	5.91878	6.17672	5.86278	5.85901
0.0081	5.91469	6.35935	5.88747	5.90642
0.0082	6.04583	6.09853	5.96451	5.88756
0.0083	5.96753	6.17994	5.93004	5.94777
0.0084	5.84754	6.08226	5.90241	5.89974
0.0085	6.07894	6.21303	5.83667	5.78608
0.0086	5.99314	6.18839	6.09313	5.92
0.0087	5.96421	6.15453	5.90397	5.99622
0.0088	5.95931	6.10778	5.9894	5.85557
0.0089	5.93074	6.10621	5.94794	5.84601
0.009	5.92743	6.28394	5.85257	5.90004
0.0091	6.003	6.26757	5.99085	5.81858
0.0092	6.01734	6.12903	5.90352	5.8835
0.0093	5.93145	6.2741	5.88497	5.94002
0.0094	5.99274	6.25164	6.032	5.94584
0.0095	5.97275	6.13967	6.02781	5.89124
0.0096	6.07489	6.10715	5.97257	5.89512
0.0097	6.02892	6.27976	6.01107	5.88865
0.0098	6.04029	6.12984	5.90803	5.86683
0.0099	6.1236	6.30401	5.93509	5.86945
0.01	5.95115	6.10605	5.93412	5.81398
0.0101	6.17711	6.20609	5.91008	5.90039
0.0102	5.95601	6.20122	6.05567	5.96955
0.0103	6.03463	6.29238	5.96471	6.10093
0.0104	6.15305	6.28885	6.02065	5.96047
0.0105	5.98194	6.35755	5.89704	6.02457
0.0106	6.12536	6.25309	6.00008	5.98285
0.0107	6.10743	6.30886	5.94986	5.97901
0.0108	6.10958	6.30816	6.08669	5.91645
0.0109	6.03951	6.20787	5.89676	5.89985
0.011	6.02915	6.2678	6.03261	5.90095
0.0111	6.1617	6.15392	6.06618	5.92719
0.0112	6.22199	6.17901	5.99453	5.99553
0.0113	6.10912	6.29073	5.95545	5.86669
0.0114	6.14272	6.20737	5.98305	6.00742
0.0115	6.04154	6.25684	6.03627	5.95965
0.0116	6.12146	6.12781	5.90433	5.9585
0.0117	6.16903	6.16164	6.04429	6.01339
0.0118	6.18758	6.25087	6.07584	6.06543
0.0119	6.19967	6.07815	5.97591	5.84136
0.012	6.09488	6.2919	6.00286	5.92766
0.0121	6.10732	6.30109	5.94721	5.93677
0.0122	6.17495	6.13067	6.10004	6.00513
0.0123	6.06975	6.19709	6.01067	5.98542
0.0124	6.16575	6.28711	6.07843	5.9845
0.0125	6.07	6.17661	6.0597	5.95945
0.0126	6.05315	6.16042	5.98575	6.02544
0.0127	6.09557	6.20308	6.05446	5.99918
0.0128	6.19512	6.16491	5.91623	6.06443
0.0129	6.003	6.29792	6.11808	5.85947
0.013	5.99218	6.21032	6.0002	5.91091
0.0131	6.187	6.23015	6.00841	5.94948
0.0132	6.10022	6.13573	6.03455	5.96015
0.0133	6.0306	6.30805	6.06167	6.17046
0.0134	6.07135	6.13262	6.0842	6.04081
0.0135	6.22567	6.2863	5.98566	5.98481
0.0136	6.08802	6.26191	6.09795	5.93837
0.0137	6.1592	6.27425	6.05629	6.04442
0.0138	6.01121	6.21509	6.02936	5.96084
0.0139	6.01934	6.28063	5.93729	6.00504
0.014	6.16034	6.24891	6.05684	6.03949
0.0141	6.07193	6.17357	5.96067	5.96636
0.0142	6.11051	6.14338	6.02875	6.02182
0.0143	6.06012	6.1857	5.93439	6.03521
0.0144	6.01961	6.13674	5.84408	5.9918
0.0145	6.10256	6.19523	5.94504	5.95231
0.0146	6.04042	6.26763	5.94982	5.99463
0.0147	6.05416	6.20653	5.95011	5.99865
0.0148	6.07979	6.25061	5.92716	5.92577
0.0149	5.99624	6.245	5.89386	5.95243
0.015	6.08161	6.2257	5.94524	5.92608
0.0151	5.95673	6.14901	6.0616	6.05536
0.0152	6.06839	6.09659	6.01226	5.99694
0.0153	6.02178	6.31258	6.11826	5.90229
0.0154	6.13161	6.31821	6.06363	5.88845
0.0155	6.16907	6.25315	6.04133	6.03777
0.0156	6.15134	6.06394	6.02054	5.89376
0.0157	6.22553	6.1449	6.08097	6.11107
0.0158	6.08794	6.21682	6.01087	5.94436
0.0159	6.07486	6.14878	6.00045	6.0133
0.016	6.05504	6.18551	6.07967	5.91082
0.0161	5.99927	6.36371	5.84429	6.00013
0.0162	6.11747	6.18239	5.92435	5.87072
0.0163	6.07123	6.15711	5.96123	5.96464
0.0164	6.1093	6.17736	5.7979	6.05933
0.0165	6.2047	6.17667	5.99019	6.03052
0.0166	6.08822	6.21674	6.00826	5.97991
0.0167	6.11475	6.24761	5.96866	5.94979
0.0168	6.05671	6.18872	6.06659	5.91701
0.0169	6.05172	6.22988	5.97881	6.03052
0.017	6.19518	6.33132	5.99938	5.99575
0.0171	6.08088	6.27578	6.02245	6.10849
0.0172	6.11921	6.10074	5.95	5.90293
0.0173	6.14464	6.27656	5.91048	5.9805
0.0174	6.0718	6.25148	5.94332	5.96651
0.0175	6.00786	6.31038	5.98356	5.87468
0.0176	6.15664	6.25522	6.00458	6.01978
0.0177	6.03484	6.11512	5.97921	6.01607
0.0178	6.10267	6.16782	6.00718	5.94036
0.0179	6.01697	6.12592	6.00571	5.89086
0.018	6.16611	6.2837	6.06093	6.07917
0.0181	6.04094	6.18396	6.04494	5.9387
0.0182	5.9769	6.08657	5.97494	5.85625
0.0183	5.97802	6.22812	5.83603	5.87035
0.0184	6.12294	6.19292	6.02858	6.03453
0.0185	6.0728	6.18206	5.98015	5.97306
0.0186	6.05927	6.06875	5.99915	5.99733
0.0187	6.03194	6.18642	6.10119	5.97725
0.0188	6.13114	6.13929	6.0588	5.96847
0.0189	6.00615	6.21428	6.11435	5.99236
0.019	5.99349	6.25431	6.05202	5.88085
0.0191	5.96309	6.15873	5.94011	5.93061
0.0192	6.03069	6.21416	5.93377	5.99305
0.0193	6.09093	6.29827	6.13817	5.86364
0.0194	6.13219	6.21116	5.90793	5.91204
0.0195	6.11588	6.27176	5.9999	6.02001
0.0196	6.03057	6.21621	5.94606	5.91256
0.0197	6.0647	6.18364	5.94825	6.01073
0.0198	6.0441	6.2085	6.0432	6.0262
0.0199	6.12104	6.26748	6.0031	5.96204
0.02	6.07404	6.15142	6.07212	5.96608
0.0201	6.04157	6.17197	6.05858	5.81652
0.0202	6.06383	6.2576	5.94419	5.88555
0.0203	6.07724	6.27015	5.91431	6.03949
0.0204	6.00538	6.2418	5.85384	5.92913
0.0205	6.08571	6.21061	5.81629	5.86677
0.0206	6.0989	6.08754	5.9301	5.88416
0.0207	6.12851	6.18499	5.98658	5.98281
0.0208	6.12107	6.12154	5.95559	5.89829
0.0209	6.08764	6.14159	5.9811	5.81014
0.021	6.2007	6.13935	5.97852	5.97506
0.0211	6.01142	6.25045	6.01098	5.95269
0.0212	6.08446	6.27897	6.085	5.8507
0.0213	5.97622	6.18056	6.07755	5.97695
0.0214	6.06885	6.25124	5.94103	5.863
0.0215	5.95417	6.23594	6.06006	5.93844
0.0216	6.05785	6.30919	5.96116	5.90267
0.0217	6.11316	6.22203	5.98565	5.98761
0.0218	6.13504	6.1982	5.89463	5.84736
0.0219	5.98475	6.27843	5.99859	5.91749
0.022	5.99846	6.27451	5.99433	5.97989
0.0221	6.07367	6.18451	6.05239	5.87546
0.0222	5.97359	6.07891	6.04809	5.9229
0.0223	6.10695	6.22872	5.95475	5.9618
0.0224	6.04641	6.1401	6.08292	6.01059
0.0225	6.07496	6.14654	6.03818	5.83786
0.0226	6.16942	6.18433	6.0048	5.90915
0.0227	6.16336	6.2011	6.06057	5.9909
0.0228	6.15386	6.23009	5.8975	5.92586
0.0229	5.97939	6.10982	5.99814	5.88138
0.023	6.12574	6.20904	5.92304	5.86556
0.0231	6.12517	6.2336	6.03202	5.80463
0.0232	6.06475	6.24248	6.04601	5.90006
0.0233	6.06524	6.20281	5.93989	5.98707
0.0234	6.02033	6.29644	5.76903	5.86742
0.0235	5.9556	6.0757	5.95621	5.84485
0.0236	6.08916	6.24521	5.85541	5.90613
0.0237	5.98775	6.18851	5.86237	6.049
0.0238	6.07024	6.18093	5.89907	5.85767
0.0239	6.08834	6.23916	6.01314	5.85445
0.024	6.01264	6.28011	5.99183	5.90467
0.0241	6.05396	6.21419	5.88698	5.93392
0.0242	6.07715	6.18854	6.08239	6.00121
0.0243	6.05452	6.28775	6.06049	5.89936
0.0244	6.11847	6.16523	5.92496	5.87539
0.0245	6.08417	6.19282	5.96366	5.99256
0.0246	6.15413	6.0709	6.09343	5.89042
0.0247	6.07132	6.22875	6.0011	6.01004
0.0248	6.06829	6.26532	6.04978	6.00863
0.0249	6.00252	6.28081	5.91697	5.82177
0.025	5.91848	6.09832	5.95649	6.02535
0.0251	6.05669	6.19928	5.88614	5.94655
0.0252	6.09186	6.18114	5.918	5.94449
0.0253	5.97336	6.09115	6.04071	5.8832
0.0254	6.16501	6.21125	6.00417	5.8279
0.0255	6.10097	6.13833	5.98656	5.81928
0.0256	6.1014	6.16907	5.95029	5.96534
0.0257	6.10135	6.21908	5.94869	5.89594
0.0258	6.075	6.17666	5.93081	5.98299
0.0259	6.08086	6.20829	5.90229	5.8818
0.026	5.95316	6.40304	5.99167	5.92806
0.0261	6.10013	6.12177	6.00155	5.83413
0.0262	6.10891	6.21763	5.91864	5.90645
0.0263	6.02334	6.31655	5.96476	6.01381
0.0264	6.00553	6.19745	5.80938	5.9218
0.0265	5.98896	6.15241	5.95121	5.90459
0.0266	6.20803	6.17623	5.95244	5.79764
0.0267	6.08672	6.27558	5.95525	6.00336
0.0268	6.03936	6.30309	6.0494	5.9188
0.0269	5.99613	6.17985	5.82952	5.92203
0.027	6.06537	6.16709	5.963	5.87932
0.0271	6.08252	6.18355	5.95601	5.89975
0.0272	6.06487	6.12648	6.01221	5.94484
0.0273	6.1189	6.31208	5.9155	5.82563
0.0274	6.04639	6.15084	5.98057	5.86885
0.0275	5.94504	6.21613	5.76796	5.80307
0.0276	6.02689	6.22959	5.83343	5.96882
0.0277	6.06272	6.11899	5.97123	5.91323
0.0278	6.11263	6.09412	5.94822	5.78379
0.0279	6.08301	6.09897	6.00489	5.90145
0.028	5.98381	6.15397	5.95322	5.80394
0.0281	6.10207	6.18744	5.941	5.93737
0.0282	6.12429	6.21793	5.93599	5.80222
0.0283	5.96756	6.26391	5.8649	5.87709
0.0284	5.97681	6.21453	5.9227	5.88682
0.0285	5.94661	6.19814	6.00911	5.80485
0.0286	6.07494	6.15148	5.88489	5.94805
0.0287	5.90365	6.19199	5.95505	5.93711
0.0288	6.07438	6.16526	5.976	5.91269
0.0289	5.99442	6.20639	5.90513	6.00684
0.029	5.96163	6.18793	5.9518	5.81284
0.0291	5.97637	6.1888	6.05297	5.81003
0.0292	6.09523	6.24199	5.95437	5.86805
0.0293	6.04604	6.27021	5.93183	5.98446
0.0294	5.95955	6.15416	6.00634	5.90403
0.0295	6.10808	6.13271	5.96013	5.84243
0.0296	6.08851	6.19902	5.92266	5.96824
0.0297	6.11286	6.2862	5.98362	5.98713
0.0298	6.00413	6.08687	6.02387	5.9059
0.0299	6.02826	6.11883	5.93276	5.97463
0.03	5.96668	6.30367	5.89971	5.85309
0.0301	6.0421	6.07149	5.94486	5.92229
0.0302	6.11921	6.25077	6.01763	5.89414
0.0303	6.11818	6.22695	5.93903	5.92104
0.0304	6.07439	6.16829	5.98307	5.92867
0.0305	5.99601	6.09162	5.91604	5.82679
0.0306	6.00017	6.04992	5.87452	5.91874
0.0307	5.98304	6.21167	5.90143	5.82074
0.0308	5.97591	6.13071	6.03772	5.94939
0.0309	6.00699	6.23058	5.94663	5.8362
0.031	5.94845	6.17922	5.94063	5.85219
0.0311	6.14121	6.1334	5.91906	5.98157
0.0312	6.04088	6.15616	5.89608	6.01182
0.0313	6.04615	6.13689	6.04349	5.8789
0.0314	6.03344	6.17501	5.93343	5.90451
0.0315	6.06812	6.20803	5.85764	5.84871
0.0316	6.01339	6.19292	6.07833	5.94874
0.0317	5.84406	6.1863	5.89963	5.90245
0.0318	6.07488	6.16475	5.874	5.87427
0.0319	5.99965	6.07145	5.88617	5.88575
0.032	6.02285	6.13326	5.96389	5.91582
0.0321	6.00255	6.2212	6.00585	5.90154
0.0322	6.044	6.0458	6.09684	5.77895
0.0323	5.99942	6.13865	5.96238	5.85238
0.0324	6.02117	6.16932	5.86286	5.92336
0.0325	5.93709	6.22774	6.01207	5.922
0.0326	6.07793	6.09328	5.96268	5.83103
0.0327	6.00428	6.22103	6.01337	5.98194
0.0328	6.07332	6.17266	5.96012	5.93809
0.0329	6.05224	6.10848	5.93079	5.8935
0.033	6.02129	6.0736	5.90732	5.77939
0.0331	6.09308	6.19477	5.93798	5.86283
0.0332	6.02526	6.17844	5.94726	5.89647
0.0333	6.20925	6.1486	6.04596	5.92888
0.0334	6.04699	6.16627	5.97374	6.03136
0.0335	6.07404	6.127	5.89084	5.97945
0.0336	5.87232	6.23963	5.89776	5.81023
0.0337	5.92785	6.16425	5.93487	5.9375
0.0338	6.11565	6.16205	6.01606	5.94124
0.0339	5.94469	6.1417	5.98012	5.83314
0.034	6.10866	6.15499	6.01366	5.80823
0.0341	6.00495	6.20417	5.8883	5.80016
0.0342	5.98827	6.20357	5.95034	5.95014
0.0343	6.07125	6.22446	5.95609	5.9368
0.0344	6.13346	6.13576	5.90995	5.88109
0.0345	6.01822	6.09919	6.00727	5.98081
0.0346	6.0779	6.20482	5.8087	5.73647
0.0347	6.00496	6.10459	5.9816	5.78261
0.0348	6.07988	6.13413	6.00915	5.88372
0.0349	6.045	6.23368	5.87729	5.85096
0.035	6.0402	6.14814	5.91979	5.93236
0.0351	6.04654	6.15441	5.9267	5.82491
0.0352	6.08539	6.18184	5.96956	5.88425
0.0353	6.01946	6.23337	5.87743	5.85004
0.0354	6.0757	6.13933	5.84774	5.91175
0.0355	5.98063	6.13282	5.95533	5.94541
0.0356	6.09353	6.19318	5.97731	5.9294
0.0357	6.01011	6.11219	5.89603	5.92321
0.0358	5.96489	6.20839	5.93679	5.81283
0.0359	6.05675	6.18847	5.8057	5.89978
0.036	6.00536	6.27614	5.94864	5.88146
0.0361	6.01757	6.21926	5.91567	5.9179
0.0362	6.06865	6.29735	5.98334	5.86655
0.0363	6.03867	6.27779	5.95481	5.91367
0.0364	5.9887	6.21622	5.80555	5.87375
0.0365	6.08591	6.16463	5.96465	5.79122
0.0366	6.01929	6.26781	5.81092	5.84997
0.0367	5.95275	6.18952	5.8808	5.93813
0.0368	6.11637	6.22733	5.94864	5.82065
0.0369	6.06493	6.12369	5.93999	5.8384
0.037	5.9484	6.16933	5.89011	5.84328
0.0371	6.01799	6.05825	5.91993	5.82499
0.0372	6.01093	6.13083	5.96602	5.72736
0.0373	6.08995	6.17029	5.96839	5.94365
0.0374	5.9583	6.20391	6.07325	5.91877
0.0375	5.98426	6.05993	5.97519	5.96143
0.0376	6.05919	6.20812	5.89419	5.80654
0.0377	6.08051	6.1169	5.86925	5.85073
0.0378	5.98195	6.2201	5.86188	5.81864
0.0379	5.99123	6.1344	5.95167	5.809
0.038	6.05132	6.15259	5.96648	5.83993
0.0381	5.96276	6.09542	5.92029	5.89777
0.0382	6.0546	6.16169	5.93587	5.99035
0.0383	5.91875	6.15575	5.80079	5.81905
0.0384	6.03487	6.19344	5.90178	5.8599
0.0385	6.0308	6.23555	6.01848	5.79485
0.0386	5.92856	6.03054	6.07756	5.941
0.0387	6.02916	6.12334	5.83892	5.8685
0.0388	5.98365	6.23803	5.99885	5.87917
0.0389	5.94796	6.1147	6.00023	5.81424
0.039	5.9189	6.11245	5.95936	5.79683
0.0391	5.98014	6.1697	5.89219	5.9002
0.0392	6.17171	6.13711	5.95362	5.80051
0.0393	5.91866	6.16392	5.92963	5.89542
0.0394	5.99106	6.18278	5.86951	5.73636
0.0395	5.98111	6.27878	5.95006	5.89145
0.0396	5.9016	6.16277	5.94445	5.85271
0.0397	5.91797	6.21564	5.85793	5.90578
0.0398	6.05117	6.17377	5.9377	5.91678
0.0399	6.00132	6.22468	5.91092	5.82216
0.04	6.06745	6.03766	5.98075	5.91433
0.0401	6.00943	6.10393	5.89708	5.77804
0.0402	6.03908	6.23383	5.81127	5.94906
0.0403	5.9365	6.13805	5.79259	5.976
0.0404	6.03984	6.10892	5.93914	5.98964
0.0405	5.87684	6.14118	5.79546	5.86405
0.0406	5.93583	6.22223	5.89754	5.83834
0.0407	6.06734	6.15241	5.76889	5.86519
0.0408	6.05756	6.23658	6.03834	5.87386
0.0409	5.89727	6.17902	6.01893	5.9016
0.041	6.02996	6.17746	5.9619	5.76398
0.0411	6.09339	6.24976	5.87079	5.82981
0.0412	6.09169	6.18796	5.92518	5.96763
0.0413	5.98197	6.04657	5.99421	5.82627
0.0414	5.97649	6.05817	5.90873	5.82935
0.0415	6.07377	6.10891	6.01084	5.85622
0.0416	5.94957	6.04172	5.89757	5.98081
0.0417	6.06191	6.03676	6.00649	5.93114
0.0418	5.99154	6.14924	5.93032	5.87891
0.0419	6.03097	6.23223	5.988	5.86779
0.042	5.85901	6.30782	5.93238	5.95435
0.0421	5.99216	6.06716	5.98424	5.92887
0.0422	5.99643	6.08326	5.9267	5.84978
0.0423	6.01424	6.13961	6.00808	5.81414
0.0424	6.04027	6.05355	5.89176	5.83918
0.0425	6.029	6.10259	5.93253	5.90597
0.0426	6.11484	6.27266	5.85277	5.76131
0.0427	6.06084	6.28516	5.84708	5.74358
0.0428	5.91492	6.2293	5.94425	5.844
0.0429	5.92377	6.15607	5.83878	5.83129
0.043	5.90307	6.14403	5.81423	5.78467
0.0431	5.9892	6.25728	5.9348	5.83635
0.0432	6.09163	6.10453	5.98745	5.97326
0.0433	5.89766	6.22918	5.9349	5.81087
0.0434	6.01265	6.21148	5.90218	5.91732
0.0435	6.12876	6.19562	5.85569	5.91988
0.0436	6.07212	6.12255	5.93393	5.86487
0.0437	6.02433	6.105	5.98975	5.89374
0.0438	5.98205	6.24163	5.95093	5.72358
0.0439	5.87868	6.16199	5.88962	5.81318
0.044	5.99962	6.17054	5.95775	5.83806
0.0441	5.99207	6.24517	5.9636	5.80752
0.0442	5.89042	6.13919	5.967	5.87143
0.0443	6.06846	6.17785	5.96885	5.78811
0.0444	6.06934	6.12664	5.90108	5.82871
0.0445	5.9959	6.17539	6.00448	5.89159
0.0446	6.03045	6.22062	5.88929	5.75963
0.0447	5.92505	6.12775	5.90899	5.97843
0.0448	6.04679	6.10401	5.86027	5.85521
0.0449	5.96567	5.97005	5.90087	5.83455
0.045	5.97171	6.14437	5.86211	5.91752
0.0451	5.93389	6.19338	5.94278	5.7577
0.0452	5.95981	6.18163	5.89353	5.73902
0.0453	6.15304	6.06365	5.88897	5.93717
0.0454	5.97518	6.12436	6.02433	5.8936
0.0455	6.08719	6.08501	5.93744	5.81429
0.0456	5.91453	6.13262	5.94922	5.81
0.0457	5.98801	6.21993	5.98734	5.85138
0.0458	5.8348	6.21999	5.97698	5.89826
0.0459	5.9181	6.0676	5.98719	5.9526
0.046	5.99338	6.23527	5.79787	5.92924
0.0461	5.892	5.94469	5.96531	5.79198
0.0462	5.97506	6.14554	5.9157	5.8613
0.0463	6.11609	6.13059	5.91385	5.87673
0.0464	6.05156	6.19869	6.01006	5.92772
0.0465	5.82468	6.1854	5.85746	5.92945
0.0466	6.09392	6.22251	5.98733	5.96174
0.0467	5.98086	6.12746	5.80848	5.93242
0.0468	5.92611	6.14092	5.95966	5.84438
0.0469	5.99308	6.19814	5.94919	5.85076
0.047	6.02622	6.19336	5.92699	5.76619
0.0471	6.06244	6.11365	5.95977	5.80555
0.0472	6.068	5.99509	5.90511	5.72522
0.0473	6.0637	6.10584	5.95366	5.80356
0.0474	5.97867	6.16964	5.928	5.91263
0.0475	5.98237	6.11196	5.90151	5.79824
0.0476	5.97838	6.16338	5.97864	5.71753
0.0477	5.85448	6.20867	5.9641	5.83256
0.0478	5.9365	6.16309	5.94524	5.84829
0.0479	5.9936	6.20479	6.01015	5.79998
0.048	6.01293	6.07009	5.93992	5.90003
0.0481	6.02291	6.1278	5.96444	5.90982
0.0482	5.84749	6.06763	5.89081	5.82076
0.0483	5.97319	6.08873	5.89811	5.86339
0.0484	5.94579	6.15009	5.80011	5.78879
0.0485	5.90885	6.19097	5.95604	5.8937
0.0486	6.03861	6.15358	6.02248	5.84658
0.0487	5.88297	6.0729	5.92295	5.85912
0.0488	5.98424	6.11123	5.82741	5.85138
0.0489	6.14609	6.17344	5.95762	5.88024
0.049	5.96686	6.05304	5.95234	5.88117
0.0491	6.00283	6.20684	5.92342	5.89564
0.0492	5.94239	6.254	5.83602	5.75544
0.0493	5.93694	6.20124	6.0075	5.83701
0.0494	6.04552	6.20743	5.97994	5.71935
0.0495	6.00315	6.23339	6.03099	5.91654
0.0496	6.01639	6.14626	6.05988	5.76716
0.0497	6.10549	6.10955	5.90552	5.82135
0.0498	6.08663	6.14536	5.9927	5.92335
0.0499	5.98427	6.11796	5.91541	5.80379
0.05	6.02015	6.01786	5.79975	5.85007
0.0501	6.10712	6.14084	5.97924	5.91419
0.0502	5.99824	6.15107	5.87986	5.90735
0.0503	6.1513	6.21506	5.94194	5.93862
0.0504	5.9175	6.21291	5.89144	5.87612
0.0505	6.0318	6.22461	5.98119	5.92243
0.0506	6.04583	6.15786	6.02283	5.86113
0.0507	5.99735	6.11654	5.99996	5.72449
0.0508	5.98707	6.17006	5.87777	5.84612
0.0509	6.07094	6.07612	5.93526	5.88685
0.051	6.02472	6.15827	5.92725	5.78466
0.0511	6.01061	6.09018	5.9561	5.81559
0.0512	6.00672	6.14669	5.87786	5.8091
0.0513	5.89733	6.20885	5.83809	5.84118
0.0514	6.00557	6.21393	5.97237	5.86971
0.0515	5.97271	6.34157	5.8133	5.86246
0.0516	5.94445	6.13797	5.7893	5.84757
0.0517	5.90803	6.13752	5.89	5.77465
0.0518	5.98529	6.20047	5.89235	5.94442
0.0519	6.00486	6.08371	5.82238	5.89699
0.052	6.02489	6.12204	5.82508	5.87742
0.0521	6.0756	6.10047	6.05149	5.96373
0.0522	6.04195	6.14213	5.91665	5.84356
0.0523	5.87592	6.12993	5.94017	5.75713
0.0524	5.96932	6.06136	5.9181	5.91613
0.0525	6.0188	6.18767	5.87732	5.82816
0.0526	5.95417	6.09548	5.89762	5.85379
0.0527	6.01175	6.09864	5.97436	5.83974
0.0528	6.11161	6.15665	5.97875	5.80623
0.0529	5.88575	6.10224	5.92928	5.92985
0.053	6.00837	6.22084	5.90358	5.784
0.0531	5.98694	6.10276	5.88715	5.85515
0.0532	6.04593	6.08719	5.87757	5.81176
0.0533	5.99033	6.11062	5.84469	5.86527
0.0534	6.15766	6.07682	5.83632	5.81843
0.0535	6.02237	6.11297	5.85877	5.88534
0.0536	5.97945	6.13665	5.89339	5.80727
0.0537	6.04451	6.01755	6.02958	5.81963
0.0538	6.07703	6.19164	5.89835	5.81507
0.0539	5.97907	6.113	5.86182	5.74105
0.054	5.9824	6.10624	5.90911	5.81836
0.0541	6.05289	6.14541	5.93512	5.82911
0.0542	5.99752	6.1292	5.94309	5.82335
0.0543	5.94335	6.06609	5.93056	5.8234
0.0544	6.02176	6.1751	5.93642	5.89029
0.0545	5.9267	6.08439	5.91416	5.9645
0.0546	6.07167	6.33245	5.93549	5.75676
0.0547	5.96198	6.16637	5.92966	5.82033
0.0548	6.01748	6.16894	5.7974	5.84272
0.0549	6.00301	6.09328	5.89039	5.81292
0.055	5.94558	6.14733	5.82822	5.88894
0.0551	5.91843	6.18979	5.87256	5.81339
0.0552	5.91492	6.17737	5.94448	5.78011
0.0553	5.86652	6.15984	5.88112	5.78365
0.0554	6.05451	6.1787	5.85935	5.8388
0.0555	6.00489	6.05788	5.94588	5.83895
0.0556	5.9887	6.15183	5.93769	5.83417
0.0557	5.98305	6.09673	5.93522	5.784
0.0558	5.87766	6.20243	5.98226	5.8956
0.0559	5.88762	6.09108	5.86638	5.82799
0.056	5.98835	6.17937	5.88602	5.89133
0.0561	5.94185	6.21334	5.90532	5.80228
0.0562	5.98418	6.1307	5.9283	5.88726
0.0563	5.94477	5.98147	5.97129	5.8333
0.0564	5.98198	6.12745	5.77445	5.8897
0.0565	6.0145	6.20762	5.99941	5.78431
0.0566	5.96177	6.15142	5.92533	5.82148
0.0567	5.91272	6.08909	5.94553	5.87453
0.0568	6.07615	6.19806	5.90949	5.82396
0.0569	5.91306	6.12299	5.9468	5.76412
0.057	5.9676	6.16662	6.00147	5.86368
0.0571	6.10881	6.14176	5.94027	5.81211
0.0572	5.9245	6.06484	5.98449	5.81366
0.0573	5.97129	6.12351	5.95948	5.83014
0.0574	5.91066	6.21403	5.91997	5.92811
0.0575	5.98665	6.06124	5.88877	5.9292
0.0576	5.92135	6.13471	5.90487	5.87653
0.0577	6.01581	6.0673	6.02584	5.82514
0.0578	5.99154	6.09812	5.91611	5.83139
0.0579	6.06469	6.03022	5.90973	5.90908
0.058	6.04419	6.04926	5.94423	5.91585
0.0581	5.97132	6.10234	5.86542	5.82171
0.0582	6.02823	6.20696	5.90368	5.84505
0.0583	6.01755	6.07886	5.86509	5.8996
0.0584	5.99888	6.19478	5.84298	5.90389
0.0585	5.9587	6.09937	5.98604	5.80182
0.0586	6.05971	6.12659	5.92136	5.79516
0.0587	6.00951	6.10317	6.04133	5.77324
0.0588	6.01272	6.02356	5.99532	5.81054
0.0589	5.98322	6.23008	5.96183	5.81934
0.059	5.87876	6.19809	5.92705	5.82331
0.0591	6.02074	6.18059	5.8488	5.87073
0.0592	5.97925	6.09223	5.85732	5.8025
0.0593	6.05208	6.05988	6.02161	5.9614
0.0594	5.83024	6.09591	6.0095	5.80189
0.0595	5.96663	6.07973	5.87938	5.96708
0.0596	5.88436	6.14173	5.85125	5.83286
0.0597	6.11144	6.04625	5.92942	5.86463
0.0598	6.10055	6.18009	5.93952	5.78923
0.0599	5.92403	6.24306	5.96459	5.77825
0.06	5.98525	6.1363	5.93194	5.63196
0.0601	6.08915	6.11712	5.92785	5.89309
0.0602	5.98754	6.14742	5.90606	5.84907
0.0603	5.95287	6.25644	5.86075	5.72454
0.0604	6.10802	6.28823	5.87981	5.91663
0.0605	6.02538	6.07128	5.79012	5.78853
0.0606	6.03721	6.14508	5.96067	5.80507
0.0607	6.06417	6.12185	6.05747	5.90587
0.0608	5.92849	6.23612	5.80797	5.82697
0.0609	5.96999	6.18735	5.881	5.79438
0.061	5.97437	6.11399	5.95267	5.80903
0.0611	5.92711	6.2179	5.88758	5.76958
0.0612	6.02021	6.13132	5.88036	5.78742
0.0613	5.93636	6.12011	5.91353	5.85456
0.0614	5.89466	6.09423	5.95702	5.75173
0.0615	5.94632	6.09678	5.93181	5.99422
0.0616	5.98742	6.10993	5.8745	5.78241
0.0617	5.96073	6.23142	5.909	5.85608
0.0618	6.01264	6.02039	5.91437	5.79
0.0619	5.98801	6.02535	5.83832	5.76833
0.062	5.93166	6.08922	5.92856	5.87648
0.0621	5.93552	6.0656	5.83762	5.83507
0.0622	5.98374	6.18206	5.77369	5.8207
0.0623	5.8886	6.17241	5.96804	5.90655
0.0624	6.0494	6.19147	5.90249	5.70478
0.0625	5.95542	6.02302	5.86214	5.85865
0.0626	5.99042	6.19271	5.83722	5.86914
0.0627	5.97321	6.19176	5.92698	5.74761
0.0628	5.98061	6.00979	5.83381	5.7999
0.0629	6.07442	6.08149	5.89425	5.74444
0.063	5.82371	6.05237	5.85701	5.7325
0.0631	6.07718	6.13703	5.97924	5.75954
0.0632	5.97814	6.15	5.89843	5.85378
0.0633	6.10705	6.0889	5.83191	5.77765
0.0634	6.01612	6.04038	5.82181	5.81806
0.0635	5.91651	6.19877	5.87981	5.82567
0.0636	6.08593	6.02164	5.93216	5.77897
0.0637	6.00206	6.05344	5.90725	5.89223
0.0638	5.95295	6.07746	5.85637	5.80869
0.0639	6.03983	6.11693	5.85557	5.83088
0.064	5.94471	6.10419	5.88157	5.82227
0.0641	5.90803	6.12197	5.90223	5.95031
0.0642	5.95363	6.18592	5.85874	5.86039
0.0643	6.10733	6.06807	5.89921	5.8738
0.0644	6.06192	6.19146	5.90107	5.82491
0.0645	5.98046	6.05518	5.87268	5.83973
0.0646	5.93924	6.06785	6.01418	5.83538
0.0647	5.91741	6.05135	5.82436	5.78507
0.0648	5.96019	6.07116	5.83057	5.7804
0.0649	5.91002	6.11097	5.98533	5.78571
0.065	5.92847	6.12905	5.92637	5.77762
0.0651	5.93111	6.10212	5.83747	5.84415
0.0652	5.97603	6.12177	5.76458	5.8998
0.0653	5.96914	6.11715	5.92769	5.904
0.0654	5.97223	6.15458	5.96464	5.82027
0.0655	5.90455	6.17193	5.91607	5.90655
0.0656	6.01285	6.05085	5.76224	5.76395
0.0657	6.02114	6.1475	5.8527	5.793
0.0658	6.08027	6.1733	5.81681	5.74296
0.0659	5.94759	6.17754	5.84983	5.68299
0.066	5.89071	6.06223	5.91031	5.87372
0.0661	6.04006	5.97161	5.89615	5.7919
0.0662	5.88865	6.03908	5.98032	5.79287
0.0663	5.98514	6.13274	5.85802	5.73055
0.0664	5.97138	6.09934	5.80524	5.90146
0.0665	5.98116	6.079	5.88437	5.84366
0.0666	5.89013	6.24322	5.94265	5.78524
0.0667	6.13515	6.24759	5.8378	5.78313
0.0668	5.91568	6.1218	5.97094	5.79241
0.0669	6.05436	6.08593	5.91427	5.80381
0.067	5.93082	6.14356	5.84932	5.9208
0.0671	5.9905	6.11725	5.97594	5.89429
0.0672	5.94634	6.20739	5.77021	5.91283
0.0673	5.98908	6.15749	5.90659	5.74183
0.0674	5.97901	6.1055	5.93004	5.80716
0.0675	5.94622	6.07782	5.96995	5.8062
0.0676	5.97731	6.12981	5.89136	5.77801
0.0677	5.98874	6.1832	5.88686	5.68789
0.0678	5.98755	6.10077	5.92496	5.81832
0.0679	5.97455	6.06904	5.93728	5.83854
0.068	5.93995	6.13692	5.93551	5.74164
0.0681	5.96421	6.13395	5.94388	5.77097
0.0682	5.94515	6.23253	5.90937	5.87497
0.0683	5.7706	6.19965	5.87851	5.84589
0.0684	5.98539	6.069	5.85726	5.82991
0.0685	6.06076	6.06952	5.85669	5.74103
0.0686	6.00234	6.12224	5.9316	5.81852
0.0687	6.01731	6.14637	5.85399	5.70669
0.0688	5.97033	6.18081	5.99881	5.73528
0.0689	6.0322	6.09317	5.88762	5.74927
0.069	5.98182	6.07935	5.81055	5.90052
0.0691	5.92559	6.03759	5.88666	5.8034
0.0692	6.0393	6.06711	5.89571	5.79839
0.0693	5.97286	6.11374	5.80584	5.74177
0.0694	5.96256	6.1758	5.88547	5.7506
0.0695	5.80361	6.03896	5.82862	5.81893
0.0696	5.7839	6.09301	5.92917	5.8729
0.0697	5.98566	6.03142	5.87365	5.81609
0.0698	6.00245	6.07287	5.94573	5.84064
0.0699	6.04259	6.05378	5.85965	5.88836
0.07	6.03992	6.198	5.96735	5.82775
0.0701	5.97138	6.18833	5.93673	5.86025
0.0702	5.98606	6.07787	5.94898	5.9334
0.0703	5.91709	6.11326	5.91137	5.91031
0.0704	5.93564	6.07869	5.78934	5.89475
0.0705	6.0066	6.2492	5.83492	5.84378
0.0706	6.00811	6.19086	5.93239	5.8369
0.0707	5.80401	6.11762	5.92035	5.78887
0.0708	5.93696	6.06545	5.84336	5.74187
0.0709	5.91091	6.14493	5.92907	5.72567
0.071	5.97188	6.13356	5.88257	5.75515
0.0711	6.04619	5.99775	5.80771	5.85608
0.0712	6.03974	6.1942	5.82235	5.82979
0.0713	6.02681	6.14766	5.95441	5.76423
0.0714	5.98694	6.13221	5.80736	5.83381
0.0715	5.98742	6.11174	5.85027	5.7781
0.0716	5.96174	6.1115	5.86783	5.69065
0.0717	6.07482	6.06592	5.86683	5.77247
0.0718	5.93885	6.11824	5.81826	5.66721
0.0719	5.97171	6.11142	5.75075	5.84929
0.072	5.9676	6.14541	5.91857	5.78928
0.0721	5.95455	6.19544	5.83263	5.87789
0.0722	5.9852	6.17113	5.87977	5.78885
0.0723	5.95675	6.20244	5.93265	5.83436
0.0724	5.96625	6.13117	5.9171	5.82778
0.0725	6.05562	6.0709	5.84641	5.82056
0.0726	6.01944	6.1695	5.82464	5.87697
0.0727	6.02691	6.1095	5.90294	5.69332
0.0728	5.93609	6.13886	5.77233	5.78954
0.0729	6.04215	6.1243	5.99379	5.80218
0.073	6.047	6.03657	5.8738	5.7902
0.0731	5.8918	6.09896	5.84867	5.92968
0.0732	5.9744	6.10463	5.88941	5.9119
0.0733	5.91016	6.13732	5.96909	5.79561
0.0734	6.02248	6.09182	5.80956	5.78635
0.0735	5.99271	6.20498	5.88015	5.66106
0.0736	5.96509	6.09377	6.00737	5.83535
0.0737	5.95022	6.07338	5.84252	5.86715
0.0738	5.98478	5.99338	5.8749	5.79285
0.0739	6.01873	6.16288	5.80393	5.80048
0.074	5.97681	6.01618	5.88974	5.76102
0.0741	5.91056	6.09981	5.79073	5.82433
0.0742	5.9806	6.08252	5.72408	5.71282
0.0743	6.01856	6.10436	5.931	5.72771
0.0744	5.90294	5.97608	5.84934	5.77832
0.0745	5.96766	6.21042	5.94793	5.71711
0.0746	5.92533	6.21721	5.79303	5.73441
0.0747	6.11626	6.15085	5.83941	5.8406
0.0748	5.88061	6.0624	5.95249	5.74445
0.0749	5.88642	6.12148	5.8194	5.74979
0.075	5.9258	6.13146	5.80778	5.72344
0.0751	6.04331	6.08968	5.83291	5.85613
0.0752	5.91718	6.21012	5.97582	5.74013
0.0753	6.09919	6.17258	5.76973	5.79223
0.0754	6.06446	6.04139	5.86037	5.68337
0.0755	5.88183	6.11751	5.93374	5.67075
0.0756	5.96941	6.0241	5.87696	5.89649
0.0757	6.08388	6.13152	5.94169	5.84571
0.0758	6.05558	6.1182	5.97999	5.79372
0.0759	5.96685	6.1558	5.82754	5.76203
0.076	5.9814	6.10201	5.9022	5.81421
0.0761	6.03092	6.14991	5.85143	5.78083
0.0762	5.96396	6.02037	5.9704	5.86261
0.0763	5.8239	6.20929	5.84534	5.80037
0.0764	5.99462	6.08249	5.91779	5.8044
0.0765	5.9327	6.13063	5.93892	5.73391
0.0766	5.93448	5.96636	5.92104	5.71775
0.0767	6.0131	6.07938	5.93068	5.90686
0.0768	5.97617	5.99131	5.95723	5.75628
0.0769	5.82586	6.06601	5.85299	5.74788
0.077	6.02445	6.06827	5.85863	5.76752
0.0771	6.03199	6.25144	5.89864	5.80189
0.0772	5.8993	6.0485	5.82639	5.85032
0.0773	6.0104	6.11684	5.92931	5.81653
0.0774	6.02976	6.07023	5.87836	5.83155
0.0775	5.97584	6.09298	5.89415	5.82967
0.0776	6.07454	6.08306	5.82171	5.75422
0.0777	5.98386	6.10007	5.9656	5.73929
0.0778	6.02811	6.0383	5.88456	5.75574
0.0779	5.84017	6.12542	5.82918	5.7519
0.078	6.12233	6.15722	5.86222	5.79412
0.0781	5.90384	6.13633	5.85775	5.85682
0.0782	5.96677	6.04004	5.79435	5.81562
0.0783	5.96119	6.16594	5.84427	5.78095
0.0784	5.97049	6.10587	5.74903	5.78949
0.0785	6.01796	6.12821	5.85018	5.90816
0.0786	5.91738	6.04551	5.74772	5.84754
0.0787	5.97846	6.09987	5.83623	5.73639
0.0788	5.95902	6.07999	5.81121	5.83298
0.0789	5.89254	6.07485	5.9804	5.79476
0.079	5.87603	6.11608	5.94494	5.72419
0.0791	5.83834	6.12777	5.94628	5.77378
0.0792	6.04339	6.01975	5.87622	5.78788
0.0793	5.91868	6.02022	5.85737	5.73836
0.0794	5.8695	6.15831	5.90529	5.79502
0.0795	5.88695	6.16016	5.79709	5.7474
0.0796	5.88527	6.0667	5.83837	5.80997
0.0797	5.97518	6.13622	5.79567	5.85909
0.0798	5.88706	6.15584	5.92049	5.85256
0.0799	6.01021	6.14649	5.82502	5.72127
0.08	5.99347	6.14533	5.85555	5.7504
0.0801	6.06316	6.13436	5.87731	5.70563
0.0802	6.07804	6.02076	5.83912	5.72306
0.0803	6.00419	6.10499	5.88634	5.69893
0.0804	5.94152	6.07711	5.82709	5.83239
0.0805	5.90474	6.12104	5.96035	5.73478
0.0806	5.99238	6.15281	5.97634	5.87703
0.0807	5.95998	6.08364	5.86194	5.88077
0.0808	5.93613	6.12887	5.79189	5.72605
0.0809	5.98974	6.08645	6.05694	5.70073
0.081	5.93541	6.13021	5.90471	5.82323
0.0811	5.94582	6.08318	5.9565	5.76589
0.0812	5.91056	5.98935	5.88889	5.9031
0.0813	6.01214	6.05115	5.92244	5.76586
0.0814	5.92554	5.99747	5.8205	5.81331
0.0815	6.00057	5.99309	5.74463	5.71749
0.0816	5.95481	6.16752	5.88103	5.87276
0.0817	5.92382	6.05424	5.88093	5.77448
0.0818	5.91224	6.09043	5.90944	5.85514
0.0819	6.00994	6.19159	5.81923	5.79734
0.082	5.96079	6.12709	5.78769	5.72075
0.0821	5.93212	6.06266	5.94219	5.79705
0.0822	5.93442	6.11944	5.92246	5.77895
0.0823	6.0553	5.99353	5.89071	5.71294
0.0824	6.12381	6.13195	5.89769	5.75591
0.0825	5.99802	6.06046	5.87922	5.7466
0.0826	5.91758	6.09314	5.97677	5.85212
0.0827	5.97095	6.10041	5.78862	5.83574
0.0828	5.95821	6.0757	5.95787	5.81623
0.0829	5.8604	6.01822	5.92746	5.75571
0.083	6.06199	6.08162	6.02868	5.72349
0.0831	5.88187	6.08602	5.78231	5.71505
0.0832	5.89739	5.94285	5.93569	5.69163
0.0833	5.88321	6.09816	5.92931	5.73058
0.0834	5.89461	6.083	5.8615	5.69311
0.0835	6.03357	6.10662	5.87229	5.73215
0.0836	6.08477	6.04183	5.88379	5.81179
0.0837	5.8167	6.073	5.96198	5.82317
0.0838	5.94356	6.044	5.88488	5.91456
0.0839	5.91533	5.98646	5.94602	5.85537
0.084	5.82943	5.98259	5.9036	5.75856
0.0841	5.95011	6.17649	5.84142	5.74125
0.0842	5.92008	5.92955	5.85326	5.79462
0.0843	6.01947	6.00994	5.87386	5.78505
0.0844	5.83521	6.07149	5.92095	5.76418
0.0845	5.8727	6.2417	5.87685	5.79262
0.0846	5.93917	6.09961	5.90281	5.81983
0.0847	5.95655	6.01587	5.75031	5.76587
0.0848	5.90143	6.11365	5.79664	5.74726
0.0849	6.03873	6.07534	5.75991	5.68567
0.085	5.93305	6.04848	5.79773	5.77324
0.0851	5.90784	6.14559	5.75397	5.77541
0.0852	5.95574	6.09644	5.67019	5.78797
0.0853	6.0517	6.08167	5.89498	5.68863
0.0854	6.0234	6.07644	6.02578	5.86921
0.0855	5.92324	6.23349	5.77134	5.73827
0.0856	5.89162	6.0468	5.92887	5.79024
0.0857	5.88558	6.05037	5.86529	5.80306
0.0858	5.95641	6.05643	5.79729	5.79206
0.0859	5.89983	5.98014	5.85961	5.83847
0.086	5.89617	6.06688	5.91777	5.81368
0.0861	5.88811	5.99529	5.83396	5.72075
0.0862	5.96569	6.17309	5.86381	5.80312
0.0863	6.03367	6.14123	5.92319	5.67211
0.0864	5.78498	6.05855	5.72231	5.83796
0.0865	5.93387	6.14985	5.92827	5.73937
0.0866	5.91192	6.08828	5.83471	5.73764
0.0867	5.95208	6.13306	5.85918	5.61786
0.0868	5.98824	5.94228	5.87735	5.70478
0.0869	5.97385	6.0282	6.00966	5.84453
0.087	5.96293	6.0608	5.72642	5.88253
0.0871	6.0716	6.02668	5.85106	5.78377
0.0872	5.90467	5.9755	5.91836	5.72466
0.0873	5.87987	5.98575	5.86271	5.65377
0.0874	5.88331	6.02085	5.86587	5.88485
0.0875	5.88585	5.95392	5.75141	5.83643
0.0876	6.0622	6.15332	5.96068	5.76627
0.0877	5.93911	6.07196	5.82488	5.79111
0.0878	6.05778	6.15526	5.92243	5.86364
0.0879	5.87792	6.06618	5.70965	5.81971
0.088	6.07837	6.0013	5.83387	5.72918
0.0881	5.88241	5.97193	5.79299	5.78338
0.0882	5.92083	6.10479	5.8993	5.7707
0.0883	5.95896	6.17592	5.98455	5.78139
0.0884	5.9787	6.1224	5.89269	5.71814
0.0885	5.99993	6.06582	5.8617	5.82657
0.0886	5.92322	6.06482	5.76438	5.6718
0.0887	5.89771	6.07471	5.81318	5.79403
0.0888	5.91463	6.11983	5.80866	5.76674
0.0889	5.93917	6.13814	5.87256	5.76815
0.089	5.92585	6.17858	5.89428	5.78702
0.0891	5.87522	6.07985	5.8481	5.76685
0.0892	5.91726	6.04899	5.91614	5.8234
0.0893	5.89039	6.1256	5.86484	5.83364
0.0894	5.90816	6.06074	5.82746	5.72127
0.0895	5.97785	6.17537	5.81478	5.83768
0.0896	5.97272	5.99031	5.89302	5.72031
0.0897	5.9601	6.14261	5.91474	5.70354
0.0898	5.96775	6.02559	5.89	5.77854
0.0899	5.89899	6.01163	5.87159	5.75676
0.09	5.95904	6.06421	5.84304	5.79178
0.0901	5.87206	6.13147	5.87076	5.7707
0.0902	5.92212	6.03061	5.81074	5.88234
0.0903	6.03139	6.11332	5.89675	5.89638
0.0904	5.99239	6.00835	5.89655	5.74828
0.0905	5.78788	6.12952	5.80933	5.78338
0.0906	6.05457	6.04511	5.72586	5.85521
0.0907	5.87638	6.03141	5.97016	5.8588
0.0908	5.83549	6.06344	5.89615	5.78385
0.0909	6.02373	6.04809	5.80788	5.70951
0.091	5.92937	6.03719	5.96396	5.84395
0.0911	5.95586	6.09794	5.9594	5.81759
0.0912	5.91219	6.03638	5.91132	5.73864
0.0913	6.00699	6.20955	5.82743	5.74881
0.0914	5.87009	5.98423	5.84617	5.81832
0.0915	6.01403	6.08118	5.87877	5.77164
0.0916	5.9585	6.00808	5.82554	5.81074
0.0917	5.94799	5.97848	5.91282	5.7425
0.0918	5.90917	6.02799	5.93973	5.75408
0.0919	5.88306	6.02759	5.87246	5.75994
0.092	5.9375	6.17035	5.81051	5.90841
0.0921	5.78998	6.15867	5.81173	5.80497
0.0922	5.96177	6.0819	5.83506	5.80066
0.0923	5.99735	6.00336	5.78106	5.66379
0.0924	5.80216	6.1043	5.86672	5.82746
0.0925	5.7847	6.12876	5.80901	5.78058
0.0926	5.97934	6.19558	5.88852	5.68453
0.0927	5.93964	6.08355	5.81791	5.76513
0.0928	6.00505	6.03687	5.81453	5.56894
0.0929	5.95644	6.12473	5.78972	5.64034
0.093	5.96058	5.97077	5.8714	5.7163
0.0931	5.95697	6.03621	5.9007	5.76082
0.0932	5.9262	6.11341	5.8815	5.7468
0.0933	5.91216	6.07637	5.88596	5.74624
0.0934	5.8883	6.0326	5.86156	5.72255
0.0935	5.92795	6.01682	5.82581	5.65291
0.0936	5.99627	6.0756	5.71663	5.70023
0.0937	5.85515	6.09051	5.89756	5.70552
0.0938	5.97464	6.09334	6.03428	5.77668
0.0939	5.8957	6.00934	5.7421	5.77651
0.094	5.95382	6.15166	5.84391	5.84824
0.0941	5.97693	6.04186	5.74785	5.74805
0.0942	5.95798	6.11211	5.83007	5.56971
0.0943	5.8642	6.14251	5.89887	5.67594
0.0944	5.93929	6.10132	5.90337	5.6971
0.0945	5.89341	6.10798	5.9016	5.82302
0.0946	6.02053	6.05572	5.96991	5.74459
0.0947	5.85788	6.07979	5.8827	5.82706
0.0948	5.88503	6.12162	5.88858	5.70353
0.0949	5.93433	6.17157	5.79464	5.78307
0.095	6.0214	6.09839	5.90156	5.74373
0.0951	5.94185	6.17449	5.81449	5.79859
0.0952	5.91868	6.08669	5.82483	5.72197
0.0953	5.91033	5.94436	5.85489	5.74572
0.0954	5.83788	6.03075	5.79246	5.87305
0.0955	5.95746	6.15905	5.88782	5.7493
0.0956	5.92519	6.14574	5.79519	5.85794
0.0957	5.95525	6.13276	5.79538	5.79178
0.0958	5.94388	6.05568	5.89687	5.81165
0.0959	5.81637	6.04339	5.76032	5.73212
0.096	6.02659	6.16318	5.8601	5.84131
0.0961	5.98192	6.10851	5.83552	5.73456
0.0962	5.87581	6.19545	5.74491	5.87212
0.0963	5.87607	6.14712	5.76687	5.8247
0.0964	5.89907	6.14696	5.77155	5.77668
0.0965	5.90789	6.05384	5.87781	5.75492
0.0966	5.96128	6.08783	5.85149	5.65474
0.0967	5.94428	6.03147	5.90095	5.76052
0.0968	5.97497	6.09621	5.91231	5.79618
0.0969	5.90052	6.05208	5.71096	5.68404
0.097	5.9191	6.03744	5.84554	5.62999
0.0971	5.92244	6.00199	5.95241	5.8136
0.0972	6.02949	6.0342	5.84171	5.86464
0.0973	5.77489	6.06994	5.89861	5.8098
0.0974	5.94635	6.20208	5.87766	5.68386
0.0975	5.92073	6.13714	5.72988	5.82602
0.0976	5.98086	6.1287	5.76481	5.70887
0.0977	6.02302	6.02941	5.91851	5.76262
0.0978	5.86977	6.08678	5.8733	5.88102
0.0979	5.91953	6.13694	5.94652	5.78064
0.098	5.9529	6.08504	5.8682	5.78966
0.0981	5.8817	6.00451	5.93	5.82367
0.0982	5.95133	6.03698	5.75882	5.80738
0.0983	5.93738	5.97585	5.96047	5.82575
0.0984	5.99573	5.99819	5.99337	5.71788
0.0985	5.89594	6.00536	5.79071	5.77872
0.0986	5.87627	6.08391	5.82547	5.76403
0.0987	6.00917	6.01934	5.80864	5.77541
0.0988	5.82644	6.07374	5.93931	5.7352
0.0989	5.9038	6.0755	5.91486	5.81093
0.099	6.0382	6.09238	5.87163	5.78399
0.0991	6.00858	6.0216	5.80797	5.85717
0.0992	5.85055	6.02639	5.83317	5.81485
0.0993	5.94178	6.04534	5.94431	5.82227
0.0994	5.99122	6.22516	5.94416	5.81095
0.0995	5.89791	6.06434	5.81824	5.70118
0.0996	5.84491	6.19579	5.91244	5.74414
0.0997	5.98046	5.9832	5.78519	5.75077
0.0998	5.92904	6.15044	5.8868	5.75754
0.0999	5.88448	6.20096	5.90398	5.76203
0.1	5.84804	6.0618	5.82535	5.91405

## Sheet: WT ADP
mantADP binding		WT monomer
Time (s)	Fl1	Fl2	Fl3
5e-05	4.7315	4.60204	4.67226
0.0001	4.53316	4.59261	4.66509
0.00015	4.71227	4.61333	4.81655
0.0002	4.55022	4.5859	4.76024
0.00025	4.75771	4.65218	4.71669
0.0003	4.77276	4.65563	4.68709
0.00035	4.71605	4.60644	4.64794
0.0004	4.68685	4.77108	4.80376
0.00045	4.68258	4.65752	4.79894
0.0005	4.89763	4.66305	4.91689
0.00055	4.76946	4.65017	4.88744
0.0006	4.82882	4.76638	4.8406
0.00065	4.96822	4.71486	4.80971
0.0007	4.85073	4.71535	4.8677
0.00075	4.83251	4.78591	4.84499
0.0008	4.85274	4.76516	4.89605
0.00085	4.9439	4.73595	4.93706
0.0009	4.9312	4.77212	4.81612
0.00095	4.80697	4.69066	4.92522
0.001	4.94143	4.84765	4.83986
0.00105	4.93447	4.82662	4.86101
0.0011	4.90737	4.91515	4.82766
0.00115	4.98052	4.93816	5.09966
0.0012	4.91582	5.00414	4.89412
0.00125	5.00237	4.89388	4.95552
0.0013	4.92363	5.01387	5.07357
0.00135	5.15069	4.91961	4.96038
0.0014	5.19005	4.81749	5.07985
0.00145	5.06334	4.95421	4.9804
0.0015	4.91042	4.8315	4.89809
0.00155	4.95382	4.90243	4.99782
0.0016	5.16073	4.96343	5.02587
0.00165	5.1516	5.00469	4.93209
0.0017	5.05108	5.06606	4.99297
0.00175	5.09658	5.01586	5.09386
0.0018	5.17766	5.13711	4.93053
0.00185	5.07009	5.01479	4.96804
0.0019	5.0758	4.9908	4.9688
0.00195	5.04296	4.86699	4.98696
0.002	5.04384	5.09322	4.88686
0.00205	5.11086	4.98815	5.17449
0.0021	5.20391	4.9638	5.02611
0.00215	5.20998	5.02321	5.06585
0.0022	5.11934	5.09118	5.1596
0.00225	5.17571	5.14699	5.14986
0.0023	5.17568	5.17217	5.11739
0.00235	5.15337	5.14025	5.12539
0.0024	5.1	5.01827	5.10717
0.00245	5.25075	5.20232	5.20754
0.0025	5.16036	5.28695	5.15456
0.00255	5.27044	5.07573	5.16366
0.0026	5.22268	4.93917	5.08577
0.00265	5.20681	5.12777	5.12185
0.0027	5.18099	5.12694	5.1195
0.00275	5.25136	5.15673	5.2546
0.0028	5.20217	5.16115	5.19076
0.00285	5.19561	5.21547	5.05629
0.0029	5.30651	5.18258	5.21962
0.00295	5.1874	5.20009	5.05684
0.003	5.14992	5.17638	5.09511
0.00305	5.23278	5.21883	5.20574
0.0031	5.31325	5.07488	5.13793
0.00315	5.15599	5.18981	5.1231
0.0032	5.16756	5.13723	5.21358
0.00325	5.27102	5.22213	5.08797
0.0033	5.27889	5.19341	5.2159
0.00335	5.23437	5.19829	5.38387
0.0034	5.30388	5.22585	5.1784
0.00345	5.2986	5.1613	5.11605
0.0035	5.35393	5.20745	5.23983
0.00355	5.24956	5.1548	5.01952
0.0036	5.09115	5.17391	5.17873
0.00365	5.25704	5.18368	5.13741
0.0037	5.23327	5.247	5.24138
0.00375	5.27541	5.15822	5.25496
0.0038	5.17464	5.24825	5.20974
0.00385	5.46456	5.21489	5.24233
0.0039	5.27041	5.2615	5.29711
0.00395	5.17916	5.20244	5.26687
0.004	5.19372	5.17959	5.36025
0.00405	5.13991	5.17339	5.39458
0.0041	5.26568	5.07976	5.23089
0.00415	5.27379	5.18517	5.21352
0.0042	5.40996	5.385	5.17913
0.00425	5.13027	5.14815	5.39269
0.0043	5.28441	5.24038	5.22344
0.00435	5.1798	5.19594	5.21847
0.0044	5.26684	5.21752	5.43309
0.00445	5.19613	5.1957	5.12438
0.0045	5.25118	5.35879	5.15947
0.00455	5.43544	5.19573	5.26409
0.0046	5.28655	5.08785	5.16491
0.00465	5.22399	5.19112	5.23027
0.0047	5.39119	5.23159	5.35439
0.00475	5.3785	5.19414	5.27642
0.0048	5.32473	5.15853	5.27382
0.00485	5.25777	5.20968	5.29619
0.0049	5.24083	5.20171	5.1408
0.00495	5.33645	5.14156	5.19848
0.005	5.3774	5.1675	5.25606
0.00505	5.35744	5.2878	5.31972
0.0051	5.3788	5.14995	5.19158
0.00515	5.3872	5.14388	5.22722
0.0052	5.33214	5.14287	5.35006
0.00525	5.35348	5.4543	5.24682
0.0053	5.3359	5.28542	5.30803
0.00535	5.13714	5.17669	5.11083
0.0054	5.21612	5.29165	5.17199
0.00545	5.26378	5.14687	5.25521
0.0055	5.10106	5.11953	5.29635
0.00555	5.40294	5.30089	5.26287
0.0056	5.32836	5.27636	5.27007
0.00565	5.35817	5.24636	5.17611
0.0057	5.39199	5.2058	5.33159
0.00575	5.32097	5.33373	5.20113
0.0058	5.41469	5.36431	5.33657
0.00585	5.26024	5.17305	5.33672
0.0059	5.34118	5.24324	5.45397
0.00595	5.30868	5.43123	5.31725
0.006	5.23018	5.24068	5.26613
0.00605	5.29998	5.23098	5.39898
0.0061	5.3059	5.22368	5.32259
0.00615	5.33141	5.26314	5.34127
0.0062	5.35192	5.49502	5.36455
0.00625	5.35912	5.2875	5.45095
0.0063	5.29656	5.34414	5.29964
0.00635	5.38512	5.2611	5.45742
0.0064	5.3886	5.29873	5.33745
0.00645	5.27093	5.17739	5.37334
0.0065	5.46141	5.26372	5.41765
0.00655	5.33602	5.28701	5.31011
0.0066	5.39	5.24544	5.20864
0.00665	5.3684	5.3171	5.37139
0.0067	5.39937	5.31148	5.39617
0.00675	5.31301	5.32769	5.37755
0.0068	5.40819	5.25817	5.43016
0.00685	5.39504	5.36065	5.37661
0.0069	5.36641	5.27224	5.29375
0.00695	5.36998	5.44011	5.32879
0.007	5.51198	5.20556	5.39364
0.00705	5.46129	5.29729	5.34139
0.0071	5.24935	5.3044	5.33394
0.00715	5.38134	5.23232	5.36123
0.0072	5.40343	5.2445	5.51384
0.00725	5.44301	5.34014	5.49852
0.0073	5.33208	5.24682	5.46413
0.00735	5.51156	5.32772	5.35744
0.0074	5.45113	5.26357	5.2798
0.00745	5.3564	5.26671	5.35894
0.0075	5.2911	5.2253	5.33184
0.00755	5.4193	5.25344	5.39803
0.0076	5.35061	5.28756	5.3268
0.00765	5.48253	5.23809	5.31838
0.0077	5.34685	5.40432	5.2863
0.00775	5.38039	5.27993	5.40917
0.0078	5.35784	5.35668	5.31222
0.00785	5.2889	5.2571	5.41085
0.0079	5.35747	5.29424	5.29079
0.00795	5.3695	5.28273	5.40636
0.008	5.47136	5.34139	5.42495
0.00805	5.34185	5.30581	5.55513
0.0081	5.46334	5.42775	5.26211
0.00815	5.44115	5.34752	5.46563
0.0082	5.30758	5.30681	5.37951
0.00825	5.2394	5.34588	5.39971
0.0083	5.38924	5.26265	5.43691
0.00835	5.35305	5.32619	5.33782
0.0084	5.36831	5.41903	5.3499
0.00845	5.30684	5.23064	5.35283
0.0085	5.46895	5.34258	5.26494
0.00855	5.33495	5.35332	5.27154
0.0086	5.34694	5.32876	5.3575
0.00865	5.36431	5.30629	5.359
0.0087	5.33141	5.24813	5.34127
0.00875	5.42891	5.23549	5.30602
0.0088	5.35897	5.23778	5.41259
0.00885	5.35137	5.2387	5.41518
0.0089	5.23571	5.34417	5.33339
0.00895	5.30877	5.53298	5.3922
0.009	5.26995	5.23464	5.41411
0.00905	5.33983	5.38372	5.31536
0.0091	5.41048	5.31441	5.34554
0.00915	5.36989	5.45458	5.36907
0.0092	5.32628	5.2629	5.38225
0.00925	5.45177	5.27614	5.44814
0.0093	5.48232	5.37075	5.29958
0.00935	5.35372	5.40358	5.25472
0.0094	5.30706	5.31856	5.31749
0.00945	5.4955	5.273	5.42
0.0095	5.52422	5.36855	5.23754
0.00955	5.4446	5.3423	5.54879
0.0096	5.39779	5.43667	5.41555
0.00965	5.45952	5.35888	5.42531
0.0097	5.50432	5.37688	5.4591
0.00975	5.29992	5.29329	5.27034
0.0098	5.48729	5.30913	5.39669
0.00985	5.39293	5.37609	5.29985
0.0099	5.38384	5.34447	5.48488
0.00995	5.58272	5.4323	5.47628
0.01	5.31515	5.27276	5.31627
0.01005	5.363	5.30874	5.35314
0.0101	5.40029	5.44643	5.43258
0.01015	5.28234	5.45235	5.43538
0.0102	5.46141	5.52831	5.41237
0.01025	5.46969	5.35729	5.3221
0.0103	5.46682	5.31545	5.35738
0.01035	5.49495	5.39666	5.34606
0.0104	5.40575	5.22106	5.44982
0.01045	5.42501	5.38473	5.42605
0.0105	5.37237	5.38729	5.45476
0.01055	5.39943	5.45168	5.43453
0.0106	5.51662	5.3926	5.40831
0.01065	5.40474	5.41716	5.31597
0.0107	5.34762	5.36162	5.38137
0.01075	5.48507	5.40691	5.49056
0.0108	5.50444	5.23784	5.46279
0.01085	5.50704	5.372	5.40737
0.0109	5.4797	5.46071	5.39928
0.01095	5.48	5.40929	5.44939
0.011	5.3944	5.35769	5.5147
0.01105	5.32778	5.35769	5.31222
0.0111	5.39254	5.4533	5.3019
0.01115	5.35308	5.39776	5.41976
0.0112	5.52309	5.30355	5.47594
0.01125	5.4858	5.35527	5.37063
0.0113	5.45043	5.30501	5.32683
0.01135	5.47341	5.40194	5.3398
0.0114	5.4612	5.4887	5.43688
0.01145	5.30352	5.35915	5.35195
0.0115	5.3796	5.41063	5.24553
0.01155	5.497	5.41863	5.3005
0.0116	5.25124	5.38198	5.45888
0.01165	5.41951	5.34466	5.56997
0.0117	5.41329	5.2636	5.29693
0.01175	5.41701	5.35607	5.24703
0.0118	5.51995	5.37533	5.38967
0.01185	5.44332	5.47387	5.34386
0.0119	5.39953	5.43328	5.33934
0.01195	5.45992	5.29876	5.41497
0.012	5.37011	5.29983	5.56203
0.01205	5.49553	5.51186	5.43087
0.0121	5.51137	5.34505	5.47027
0.01215	5.50188	5.37658	5.40133
0.0122	5.48055	5.3106	5.54827
0.01225	5.40505	5.47823	5.4507
0.0123	5.42742	5.40813	5.45928
0.01235	5.33202	5.23525	5.5599
0.0124	5.34728	5.42962	5.4471
0.01245	5.33156	5.33794	5.3659
0.0125	5.4457	5.32854	5.36544
0.01255	5.33895	5.40508	5.53569
0.0126	5.44793	5.33666	5.50209
0.01265	5.44655	5.21077	5.34578
0.0127	5.41051	5.32558	5.56124
0.01275	5.46856	5.40706	5.46172
0.0128	5.37386	5.35036	5.52041
0.01285	5.36373	5.27083	5.35616
0.0129	5.35506	5.50628	5.46969
0.01295	5.37981	5.54534	5.49038
0.013	5.48995	5.44661	5.51168
0.01305	5.47097	5.29836	5.43667
0.0131	5.44173	5.36333	5.5002
0.01315	5.45995	5.41369	5.43374
0.0132	5.65725	5.40834	5.53277
0.01325	5.47185	5.36577	5.36648
0.0133	5.50948	5.28817	5.50411
0.01335	5.28737	5.35296	5.50182
0.0134	5.37618	5.41991	5.35326
0.01345	5.46978	5.42165	5.47298
0.0135	5.41982	5.39965	5.18932
0.01355	5.29271	5.43703	5.38997
0.0136	5.33693	5.39345	5.53917
0.01365	5.39422	5.46004	5.3189
0.0137	5.38814	5.31984	5.41387
0.01375	5.4106	5.37093	5.47045
0.0138	5.47622	5.42516	5.48748
0.01385	5.6419	5.40935	5.30089
0.0139	5.5075	5.35393	5.43688
0.01395	5.38283	5.41564	5.38735
0.014	5.48696	5.25741	5.54055
0.01405	5.40227	5.39101	5.44048
0.0141	5.52684	5.2633	5.42885
0.01415	5.48031	5.3322	5.36797
0.0142	5.51238	5.3084	5.5042
0.01425	5.33916	5.27398	5.48937
0.0143	5.35592	5.39834	5.40432
0.01435	5.42702	5.37002	5.42766
0.0144	5.57836	5.56487	5.43471
0.01445	5.4439	5.36931	5.44289
0.0145	5.45165	5.33465	5.39299
0.01455	5.54436	5.43139	5.36055
0.0146	5.39611	5.47152	5.5371
0.01465	5.40435	5.4569	5.39403
0.0147	5.45998	5.4233	5.46645
0.01475	5.33468	5.27907	5.27477
0.0148	5.50402	5.46651	5.3087
0.01485	5.48754	5.42424	5.51333
0.0149	5.49087	5.25094	5.42483
0.01495	5.63488	5.31353	5.39943
0.015	5.37923	5.38823	5.50582
0.01505	5.57003	5.49526	5.46663
0.0151	5.59121	5.35912	5.38625
0.01515	5.41045	5.38512	5.37752
0.0152	5.51522	5.359	5.4143
0.01525	5.49303	5.27514	5.32869
0.0153	5.40358	5.38979	5.41127
0.01535	5.3723	5.48818	5.38912
0.0154	5.44857	5.38012	5.42257
0.01545	5.43956	5.44112	5.37288
0.0155	5.43773	5.39199	5.58797
0.01555	5.48501	5.30504	5.31453
0.0156	5.4207	5.26906	5.3788
0.01565	5.46468	5.45797	5.48888
0.0157	5.43761	5.57351	5.37655
0.01575	5.46599	5.50924	5.46398
0.0158	5.36504	5.33843	5.31331
0.01585	5.24724	5.36928	5.40902
0.0159	5.42305	5.51244	5.45479
0.01595	5.37273	5.48137	5.4002
0.016	5.32421	5.44017	5.32769
0.01605	5.36568	5.34408	5.42781
0.0161	5.30645	5.27691	5.57293
0.01615	5.47054	5.34295	5.39098
0.0162	5.40685	5.43377	5.43996
0.01625	5.37969	5.41442	5.34874
0.0163	5.45189	5.44689	5.4099
0.01635	5.53231	5.39153	5.40157
0.0164	5.51323	5.25478	5.39022
0.01645	5.35344	5.30697	5.40099
0.0165	5.45525	5.34957	5.38222
0.01655	5.45943	5.27114	5.45275
0.0166	5.4128	5.25887	5.37072
0.01665	5.58483	5.28505	5.34566
0.0167	5.30419	5.35805	5.46596
0.01675	5.40941	5.38918	5.42263
0.0168	5.45345	5.29854	5.45681
0.01685	5.54976	5.43865	5.38045
0.0169	5.57851	5.38689	5.47152
0.01695	5.3933	5.46242	5.45894
0.017	5.34533	5.52202	5.4786
0.01705	5.56014	5.3489	5.47008
0.0171	5.39678	5.37624	5.45592
0.01715	5.44893	5.39812	5.44103
0.0172	5.41802	5.39412	5.52819
0.01725	5.4283	5.37026	5.55162
0.0173	5.39824	5.33474	5.4345
0.01735	5.37978	5.34801	5.37941
0.0174	5.43279	5.31685	5.46029
0.01745	5.46138	5.43548	5.34612
0.0175	5.31057	5.33443	5.57723
0.01755	5.50725	5.41491	5.42818
0.0176	5.35399	5.46434	5.40447
0.01765	5.41649	5.47194	5.52633
0.0177	5.57097	5.36907	5.47432
0.01775	5.39071	5.3615	5.50078
0.0178	5.38521	5.27959	5.60442
0.01785	5.42315	5.46856	5.54668
0.0179	5.49587	5.44039	5.41799
0.01795	5.56054	5.45888	5.41582
0.018	5.38973	5.46224	5.40734
0.01805	5.50859	5.39712	5.21993
0.0181	5.48562	5.48437	5.29372
0.01815	5.33327	5.41967	5.58028
0.0182	5.44375	5.29305	5.44341
0.01825	5.39739	5.46932	5.37371
0.0183	5.38723	5.47936	5.47252
0.01835	5.44402	5.36452	5.54882
0.0184	5.30895	5.33297	5.37987
0.01845	5.37816	5.36474	5.47237
0.0185	5.37893	5.42083	5.27367
0.01855	5.39864	5.34292	5.42766
0.0186	5.40737	5.42708	5.4327
0.01865	5.56237	5.54613	5.62255
0.0187	5.41887	5.33181	5.44686
0.01875	5.5075	5.29888	5.46691
0.0188	5.45397	5.3004	5.40538
0.01885	5.53133	5.36434	5.4572
0.0189	5.52373	5.28536	5.32775
0.01895	5.50869	5.3817	5.51186
0.019	5.43429	5.42959	5.39913
0.01905	5.47921	5.3543	5.37517
0.0191	5.42849	5.44393	5.4479
0.01915	5.39165	5.43187	5.53075
0.0192	5.40035	5.333	5.44768
0.01925	5.50292	5.4605	5.41655
0.0193	5.32805	5.47689	5.42073
0.01935	5.4945	5.41362	5.3998
0.0194	5.41088	5.26387	5.3525
0.01945	5.52508	5.53457	5.51366
0.0195	5.33175	5.42794	5.53118
0.01955	5.41201	5.43889	5.5689
0.0196	5.43407	5.35973	5.53939
0.01965	5.3456	5.3651	5.46047
0.0197	5.46483	5.46203	5.38875
0.01975	5.30471	5.36507	5.47912
0.0198	5.33837	5.34386	5.33812
0.01985	5.35262	5.43972	5.53457
0.0199	5.36208	5.58983	5.49859
0.01995	5.37294	5.42113	5.48189
0.02	5.36965	5.38912	5.39483
0.02005	5.38985	5.41488	5.5465
0.0201	5.30309	5.39238	5.42098
0.02015	5.33343	5.48302	5.5071
0.0202	5.36779	5.376	5.49074
0.02025	5.35219	5.30837	5.46297
0.0203	5.50563	5.41188	5.44881
0.02035	5.30748	5.24538	5.50509
0.0204	5.44268	5.54262	5.51397
0.02045	5.53783	5.2354	5.5403
0.0205	5.4796	5.36791	5.56487
0.02055	5.53496	5.38833	5.39782
0.0206	5.39135	5.34527	5.43309
0.02065	5.4966	5.44408	5.35055
0.0207	5.42653	5.28362	5.57226
0.02075	5.44805	5.30257	5.36345
0.0208	5.37041	5.35796	5.52987
0.02085	5.36049	5.42101	5.48208
0.0209	5.46514	5.39278	5.46544
0.02095	5.43191	5.5363	5.37252
0.021	5.32131	5.52459	5.53688
0.02105	5.3131	5.35473	5.46221
0.0211	5.48086	5.22167	5.32146
0.02115	5.45943	5.37179	5.29955
0.0212	5.50328	5.3857	5.50396
0.02125	5.37765	5.26513	5.36529
0.0213	5.41942	5.35521	5.39534
0.02135	5.37569	5.42531	5.48247
0.0214	5.32055	5.4565	5.40105
0.02145	5.45531	5.36022	5.45373
0.0215	5.36596	5.35823	5.51461
0.02155	5.55507	5.2719	5.43776
0.0216	5.40389	5.40941	5.34508
0.02165	5.56811	5.407	5.30733
0.0217	5.43752	5.45165	5.40725
0.02175	5.32702	5.36071	5.53362
0.0218	5.45098	5.47359	5.41729
0.02185	5.29741	5.26055	5.39299
0.0219	5.50835	5.26476	5.32717
0.02195	5.40664	5.34426	5.27117
0.022	5.40953	5.50423	5.43956
0.02205	5.34496	5.23409	5.39757
0.0221	5.43639	5.22487	5.19521
0.02215	5.55269	5.40505	5.52959
0.0222	5.50856	5.41298	5.39476
0.02225	5.44069	5.33284	5.43267
0.0223	5.54332	5.34008	5.40087
0.02235	5.38735	5.43618	5.39364
0.0224	5.52447	5.37517	5.49855
0.02245	5.39739	5.31682	5.28145
0.0225	5.37096	5.48662	5.411
0.02255	5.40349	5.31948	5.46633
0.0226	5.45263	5.40136	5.47667
0.02265	5.4879	5.51131	5.3998
0.0227	5.40844	5.39867	5.42196
0.02275	5.46862	5.42965	5.38213
0.0228	5.37151	5.29824	5.4081
0.02285	5.41036	5.42156	5.43462
0.0229	5.44838	5.36693	5.36809
0.02295	5.39199	5.35854	5.35988
0.023	5.41646	5.30663	5.3818
0.02305	5.39251	5.2795	5.3423
0.0231	5.35998	5.37301	5.37978
0.02315	5.47524	5.52117	5.3395
0.0232	5.50661	5.3814	5.48833
0.02325	5.43261	5.32915	5.35213
0.0233	5.4862	5.37615	5.38445
0.02335	5.51754	5.30822	5.46743
0.0234	5.49212	5.501	5.38021
0.02345	5.37334	5.45171	5.42275
0.0235	5.36486	5.46407	5.26223
0.02355	5.45427	5.36794	5.45702
0.0236	5.44518	5.19597	5.4804
0.02365	5.40078	5.32506	5.48452
0.0237	5.40697	5.29485	5.52895
0.02375	5.39528	5.37355	5.41765
0.0238	5.39852	5.39086	5.47017
0.02385	5.37734	5.41555	5.36809
0.0239	5.49566	5.39947	5.45708
0.02395	5.54094	5.40279	5.49334
0.024	5.34118	5.40267	5.49663
0.02405	5.29326	5.3788	5.37075
0.0241	5.47265	5.43157	5.4316
0.02415	5.44793	5.41762	5.43532
0.0242	5.57915	5.43789	5.48412
0.02425	5.42299	5.39879	5.40383
0.0243	5.37481	5.36873	5.55388
0.02435	5.41588	5.39129	5.39559
0.0244	5.38122	5.37511	5.45855
0.02445	5.42284	5.48134	5.51104
0.0245	5.56148	5.40777	5.49187
0.02455	5.51943	5.43935	5.36083
0.0246	5.46013	5.37844	5.36348
0.02465	5.39834	5.37337	5.3727
0.0247	5.60714	5.46587	5.4435
0.02475	5.45733	5.28151	5.32109
0.0248	5.43328	5.41015	5.48733
0.02485	5.48494	5.36226	5.52785
0.0249	5.41787	5.66094	5.39391
0.02495	5.33431	5.41024	5.56572
0.025	5.44961	5.41176	5.4049
0.02505	5.47051	5.23656	5.39672
0.0251	5.33519	5.43956	5.50258
0.02515	5.39214	5.35537	5.44274
0.0252	5.49144	5.51058	5.32735
0.02525	5.40368	5.40542	5.43462
0.0253	5.28984	5.27419	5.33861
0.02535	5.44588	5.33022	5.47173
0.0254	5.41784	5.32726	5.33468
0.02545	5.40197	5.36568	5.39388
0.0255	5.40795	5.4352	5.52355
0.02555	5.40621	5.3612	5.42107
0.0256	5.36498	5.35564	5.44237
0.02565	5.38607	5.50347	5.46764
0.0257	5.36739	5.49486	5.42312
0.02575	5.28573	5.50387	5.4341
0.0258	5.32464	5.33693	5.46065
0.02585	5.40658	5.40526	5.45168
0.0259	5.5429	5.34221	5.40706
0.02595	5.4887	5.3488	5.48064
0.026	5.46706	5.46218	5.34401
0.02605	5.40551	5.47475	5.31417
0.0261	5.4507	5.5378	5.33831
0.02615	5.3579	5.44484	5.44231
0.0262	5.40566	5.47893	5.33785
0.02625	5.47701	5.43331	5.41408
0.0263	5.43267	5.34005	5.52639
0.02635	5.36815	5.4392	5.25762
0.0264	5.31829	5.33144	5.45235
0.02645	5.45305	5.40178	5.2878
0.0265	5.4435	5.31191	5.44463
0.02655	5.57756	5.48906	5.39214
0.0266	5.50521	5.14168	5.3976
0.02665	5.39019	5.41628	5.42968
0.0267	5.44817	5.33727	5.37548
0.02675	5.60149	5.51284	5.35927
0.0268	5.3854	5.37273	5.42162
0.02685	5.35537	5.37581	5.37221
0.0269	5.40218	5.38186	5.39815
0.02695	5.39763	5.46737	5.41988
0.027	5.35131	5.303	5.45635
0.02705	5.42485	5.38677	5.45046
0.0271	5.52584	5.38463	5.40474
0.02715	5.45461	5.33364	5.53161
0.0272	5.28499	5.61223	5.3879
0.02725	5.26873	5.40963	5.44045
0.0273	5.5468	5.34859	5.39126
0.02735	5.37374	5.44628	5.44243
0.0274	5.41359	5.33641	5.35555
0.02745	5.4392	5.48232	5.4963
0.0275	5.32479	5.36095	5.41466
0.02755	5.41341	5.26815	5.50121
0.0276	5.33684	5.37621	5.42376
0.02765	5.35726	5.52434	5.41463
0.0277	5.45629	5.51668	5.39324
0.02775	5.40902	5.54937	5.46236
0.0278	5.3004	5.4168	5.49669
0.02785	5.45141	5.35509	5.39358
0.0279	5.36834	5.32955	5.41659
0.02795	5.41295	5.25411	5.50017
0.028	5.37194	5.41903	5.44951
0.02805	5.33843	5.30617	5.54516
0.0281	5.41659	5.31328	5.46856
0.02815	5.46984	5.48458	5.39458
0.0282	5.3626	5.55953	5.39965
0.02825	5.41369	5.37722	5.55388
0.0283	5.23397	5.36596	5.46175
0.02835	5.3449	5.28109	5.35073
0.0284	5.49059	5.38378	5.32439
0.02845	5.45327	5.48201	5.4793
0.0285	5.3474	5.48449	5.4714
0.02855	5.55053	5.38073	5.45424
0.0286	5.41701	5.48855	5.49071
0.02865	5.43358	5.41155	5.26632
0.0287	5.44292	5.50158	5.43825
0.02875	5.50429	5.44442	5.53682
0.0288	5.36272	5.57393	5.36815
0.02885	5.43328	5.49657	5.37401
0.0289	5.46267	5.38128	5.3825
0.02895	5.40908	5.33504	5.4601
0.029	5.39476	5.38396	5.3727
0.02905	5.47872	5.39287	5.50393
0.0291	5.52233	5.30281	5.48693
0.02915	5.37035	5.41973	5.49135
0.0292	5.33019	5.3752	5.4157
0.02925	5.35366	5.29985	5.4388
0.0293	5.36388	5.42659	5.37551
0.02935	5.5133	5.47344	5.34978
0.0294	5.4479	5.43627	5.27706
0.02945	5.40133	5.37612	5.40349
0.0295	5.39699	5.41832	5.38781
0.02955	5.41121	5.34227	5.51873
0.0296	5.44796	5.4356	5.4031
0.02965	5.4143	5.43383	5.43206
0.0297	5.47466	5.29711	5.41924
0.02975	5.4272	5.4442	5.44646
0.0298	5.26131	5.43746	5.51961
0.02985	5.33169	5.31728	5.52288
0.0299	5.48317	5.42391	5.40841
0.02995	5.54696	5.40151	5.45806
0.03	5.46319	5.39345	5.48861
0.03005	5.26983	5.42443	5.48964
0.0301	5.44387	5.38671	5.34453
0.03015	5.41292	5.35021	5.355
0.0302	5.3358	5.33803	5.40459
0.03025	5.40691	5.30193	5.41591
0.0303	5.50728	5.46361	5.36934
0.03035	5.32879	5.36571	5.39351
0.0304	5.42153	5.41442	5.39382
0.03045	5.42797	5.40062	5.43718
0.0305	5.39043	5.40282	5.35558
0.03055	5.37709	5.36068	5.31725
0.0306	5.48214	5.24959	5.32113
0.03065	5.5291	5.37325	5.38988
0.0307	5.50561	5.31481	5.28188
0.03075	5.34703	5.42064	5.35622
0.0308	5.37026	5.47698	5.38979
0.03085	5.59551	5.37197	5.4272
0.0309	5.48742	5.34899	5.36431
0.03095	5.38652	5.324	5.5248
0.031	5.30315	5.36898	5.36709
0.03105	5.4507	5.38704	5.50655
0.0311	5.27324	5.40868	5.46319
0.03115	5.39132	5.33144	5.49389
0.0312	5.446	5.3521	5.41777
0.03125	5.35244	5.38811	5.39028
0.0313	5.43679	5.22448	5.45284
0.03135	5.37853	5.38875	5.38466
0.0314	5.44997	5.42611	5.32335
0.03145	5.49788	5.37606	5.42159
0.0315	5.52846	5.36751	5.29705
0.03155	5.50811	5.39977	5.47368
0.0316	5.44701	5.38076	5.3283
0.03165	5.56051	5.4486	5.3391
0.0317	5.41738	5.41775	5.515
0.03175	5.62032	5.53115	5.45025
0.0318	5.35476	5.36468	5.37087
0.03185	5.37496	5.30095	5.42949
0.0319	5.49324	5.37621	5.40737
0.03195	5.33675	5.34203	5.4544
0.032	5.49062	5.37584	5.35955
0.03205	5.32363	5.32836	5.35192
0.0321	5.35656	5.40267	5.4186
0.03215	5.46929	5.33153	5.2903
0.0322	5.37725	5.38125	5.47954
0.03225	5.44262	5.39168	5.36412
0.0323	5.30233	5.40599	5.50106
0.03235	5.41488	5.33687	5.44713
0.0324	5.36663	5.4193	5.53554
0.03245	5.30205	5.40731	5.4356
0.0325	5.52901	5.33809	5.3926
0.03255	5.29998	5.493	5.40224
0.0326	5.42965	5.38146	5.20232
0.03265	5.33336	5.34121	5.31447
0.0327	5.36565	5.39815	5.46373
0.03275	5.49666	5.31148	5.33474
0.0328	5.40239	5.34389	5.43395
0.03285	5.41805	5.39556	5.42962
0.0329	5.4626	5.43541	5.4327
0.03295	5.43511	5.53661	5.4424
0.033	5.40075	5.27801	5.37639
0.03305	5.32448	5.40453	5.38927
0.0331	5.47722	5.29729	5.45208
0.03315	5.46502	5.41674	5.41161
0.0332	5.51067	5.52892	5.36095
0.03325	5.51091	5.39553	5.43328
0.0333	5.4673	5.39629	5.4395
0.03335	5.52248	5.48784	5.41417
0.0334	5.42983	5.38402	5.43178
0.03345	5.42354	5.43123	5.40108
0.0335	5.44765	5.3568	5.40047
0.03355	5.38405	5.32015	5.34691
0.0336	5.29403	5.33419	5.37661
0.03365	5.28283	5.3893	5.42366
0.0337	5.41784	5.25304	5.52608
0.03375	5.44265	5.48903	5.34014
0.0338	5.3611	5.39565	5.36989
0.03385	5.37716	5.37832	5.44021
0.0339	5.37389	5.42254	5.37145
0.03395	5.35268	5.29525	5.30218
0.034	5.31044	5.43972	5.45244
0.03405	5.27187	5.31099	5.49282
0.0341	5.51491	5.32647	5.38912
0.03415	5.44021	5.34279	5.44024
0.0342	5.38018	5.33797	5.3752
0.03425	5.34606	5.29723	5.2965
0.0343	5.4334	5.42763	5.4041
0.03435	5.48082	5.28673	5.30983
0.0344	5.48131	5.36696	5.39705
0.03445	5.523	5.45916	5.40304
0.0345	5.31295	5.32296	5.33526
0.03455	5.282	5.58947	5.30471
0.0346	5.38842	5.37679	5.36571
0.03465	5.39345	5.37148	5.47591
0.0347	5.47359	5.39818	5.47069
0.03475	5.36879	5.33428	5.49727
0.0348	5.37612	5.31356	5.53493
0.03485	5.55324	5.55181	5.42952
0.0349	5.51241	5.44365	5.514
0.03495	5.48415	5.50075	5.44542
0.035	5.48433	5.4489	5.39419
0.03505	5.31493	5.31176	5.52144
0.0351	5.44552	5.39077	5.47078
0.03515	5.51107	5.45101	5.4543
0.0352	5.52382	5.2683	5.3453
0.03525	5.42183	5.26455	5.41955
0.0353	5.38253	5.33654	5.47808
0.03535	5.31246	5.37917	5.37545
0.0354	5.23858	5.37276	5.42659
0.03545	5.46462	5.34734	5.41625
0.0355	5.48147	5.33498	5.41744
0.03555	5.37978	5.37755	5.53038
0.0356	5.34826	5.33406	5.47472
0.03565	5.5468	5.35872	5.38558
0.0357	5.3341	5.381	5.47142
0.03575	5.44356	5.34762	5.46279
0.0358	5.46679	5.17376	5.30443
0.03585	5.5158	5.33068	5.3423
0.0359	5.55626	5.25377	5.46499
0.03595	5.44817	5.34758	5.47686
0.036	5.46801	5.38189	5.39165
0.03605	5.33599	5.36254	5.41637
0.0361	5.32927	5.2867	5.39846
0.03615	5.38012	5.43593	5.38289
0.0362	5.42138	5.29726	5.37389
0.03625	5.52437	5.2936	5.41686
0.0363	5.40587	5.38476	5.31801
0.03635	5.38585	5.33654	5.44695
0.0364	5.47905	5.39577	5.29244
0.03645	5.40844	5.34118	5.47426
0.0365	5.54763	5.36663	5.44988
0.03655	5.46129	5.42418	5.41897
0.0366	5.43883	5.4883	5.53963
0.03665	5.3817	5.4858	5.44506
0.0367	5.45629	5.40316	5.43795
0.03675	5.50579	5.42623	5.43691
0.0368	5.37917	5.32116	5.42568
0.03685	5.26427	5.43041	5.41793
0.0369	5.45153	5.34676	5.35625
0.03695	5.36489	5.32934	5.36529
0.037	5.39684	5.40288	5.42565
0.03705	5.38735	5.21251	5.43648
0.0371	5.40914	5.31157	5.28103
0.03715	5.40258	5.23919	5.46444
0.0372	5.2054	5.26714	5.46325
0.03725	5.46032	5.30712	5.44503
0.0373	5.26729	5.35814	5.53203
0.03735	5.47127	5.252	5.50002
0.0374	5.34371	5.36721	5.49855
0.03745	5.48061	5.34282	5.43526
0.0375	5.31194	5.40493	5.39086
0.03755	5.35354	5.34624	5.4302
0.0376	5.33172	5.4171	5.43191
0.03765	5.49459	5.32207	5.32549
0.0377	5.3651	5.48891	5.46669
0.03775	5.58358	5.35759	5.44887
0.0378	5.42623	5.28023	5.44317
0.03785	5.35573	5.38527	5.3525
0.0379	5.38424	5.35967	5.38598
0.03795	5.52398	5.43142	5.48086
0.038	5.39895	5.52895	5.42519
0.03805	5.38591	5.40304	5.38445
0.0381	5.32717	5.41973	5.38289
0.03815	5.34243	5.31246	5.55922
0.0382	5.44457	5.28417	5.43548
0.03825	5.46422	5.35592	5.44951
0.0383	5.49633	5.213	5.44759
0.03835	5.34746	5.31682	5.45037
0.0384	5.52999	5.35582	5.46099
0.03845	5.58632	5.48131	5.39849
0.0385	5.47283	5.37865	5.49212
0.03855	5.27337	5.44863	5.39959
0.0386	5.4074	5.25148	5.4392
0.03865	5.45916	5.38985	5.36824
0.0387	5.32805	5.49941	5.42571
0.03875	5.34917	5.3948	5.44887
0.0388	5.36632	5.29607	5.27547
0.03885	5.4045	5.41655	5.42006
0.0389	5.34484	5.45296	5.48809
0.03895	5.46401	5.40239	5.49724
0.039	5.38411	5.27724	5.36379
0.03905	5.4023	5.18194	5.37349
0.0391	5.53081	5.49492	5.48684
0.03915	5.42043	5.36422	5.42946
0.0392	5.48946	5.48055	5.4497
0.03925	5.41414	5.40551	5.34182
0.0393	5.48522	5.30697	5.47298
0.03935	5.31759	5.32024	5.34688
0.0394	5.38625	5.33251	5.37652
0.03945	5.35518	5.35372	5.48351
0.0395	5.39443	5.46834	5.45864
0.03955	5.41753	5.36452	5.4175
0.0396	5.36037	5.35241	5.38958
0.03965	5.40935	5.38463	5.43493
0.0397	5.28466	5.25585	5.28686
0.03975	5.41112	5.38787	5.36986
0.0398	5.34594	5.37029	5.27037
0.03985	5.46386	5.40084	5.32406
0.0399	5.43306	5.42229	5.3413
0.03995	5.42763	5.46849	5.42345
0.04	5.48952	5.43068	5.48626
0.04005	5.36724	5.34395	5.51522
0.0401	5.43605	5.3962	5.42971
0.04015	5.44332	5.48928	5.44146
0.0402	5.38344	5.4106	5.36931
0.04025	5.34203	5.44423	5.46615
0.0403	5.32189	5.23177	5.29329
0.04035	5.42098	5.3781	5.43343
0.0404	5.41066	5.53847	5.50322
0.04045	5.43987	5.32634	5.4367
0.0405	5.41598	5.37371	5.4005
0.04055	5.55614	5.36644	5.27468
0.0406	5.42675	5.38595	5.32503
0.04065	5.27599	5.37954	5.49324
0.0407	5.36977	5.43743	5.35332
0.04075	5.42202	5.30361	5.45287
0.0408	5.45549	5.26165	5.51568
0.04085	5.4189	5.47786	5.43194
0.0409	5.2423	5.40352	5.31032
0.04095	5.31145	5.44723	5.35466
0.041	5.3767	5.44527	5.38988
0.04105	5.34563	5.27376	5.37087
0.0411	5.40813	5.27431	5.42898
0.04115	5.6411	5.43483	5.30736
0.0412	5.44082	5.33452	5.42025
0.04125	5.4666	5.34816	5.42629
0.0413	5.39428	5.45412	5.50219
0.04135	5.50231	5.37307	5.53969
0.0414	5.3669	5.32268	5.47893
0.04145	5.38601	5.30687	5.47182
0.0415	5.39977	5.41561	5.41771
0.04155	5.29668	5.432	5.37691
0.0416	5.5158	5.36013	5.38796
0.04165	5.37652	5.21657	5.45754
0.0417	5.4861	5.44768	5.33831
0.04175	5.3965	5.29461	5.36864
0.0418	5.29592	5.35189	5.36507
0.04185	5.38839	5.26919	5.35726
0.0419	5.48098	5.2539	5.42812
0.04195	5.47365	5.49135	5.43859
0.042	5.43737	5.41137	5.44756
0.04205	5.29336	5.43264	5.47796
0.0421	5.37179	5.42684	5.37517
0.04215	5.41423	5.50515	5.49315
0.0422	5.4703	5.41073	5.47728
0.04225	5.42373	5.39293	5.33745
0.0423	5.40172	5.42568	5.35131
0.04235	5.44402	5.35726	5.40627
0.0424	5.27584	5.43459	5.4703
0.04245	5.35238	5.27855	5.38436
0.0425	5.42757	5.35436	5.54119
0.04255	5.4049	5.33892	5.35387
0.0426	5.51467	5.32824	5.29809
0.04265	5.39034	5.45574	5.27279
0.0427	5.37887	5.42733	5.45437
0.04275	5.39394	5.36718	5.40938
0.0428	5.44338	5.29216	5.45269
0.04285	5.42544	5.32866	5.44307
0.0429	5.48406	5.32238	5.50554
0.04295	5.303	5.50533	5.24541
0.043	5.40566	5.44768	5.28853
0.04305	5.41158	5.47432	5.28252
0.0431	5.35705	5.37841	5.37148
0.04315	5.41585	5.31902	5.26522
0.0432	5.50014	5.39888	5.34539
0.04325	5.43795	5.48122	5.48668
0.0433	5.48879	5.4002	5.35024
0.04335	5.48015	5.33922	5.48873
0.0434	5.53881	5.58303	5.31661
0.04345	5.41341	5.47377	5.48443
0.0435	5.3044	5.54577	5.39058
0.04355	5.44872	5.36391	5.57287
0.0436	5.42522	5.41033	5.3915
0.04365	5.2842	5.39293	5.38158
0.0437	5.30825	5.21489	5.46798
0.04375	5.51577	5.37505	5.55333
0.0438	5.56286	5.29159	5.47966
0.04385	5.3629	5.21523	5.37484
0.0439	5.3865	5.208	5.46096
0.04395	5.38601	5.14126	5.43072
0.044	5.4262	5.43679	5.43862
0.04405	5.41659	5.33486	5.4507
0.0441	5.30761	5.41112	5.49691
0.04415	5.38155	5.44295	5.37975
0.0442	5.37645	5.29235	5.44369
0.04425	5.41503	5.35311	5.31353
0.0443	5.48525	5.38515	5.43722
0.04435	5.50054	5.31737	5.42565
0.0444	5.35198	5.35631	5.39715
0.04445	5.37539	5.19924	5.40636
0.0445	5.3153	5.35302	5.47054
0.04455	5.38546	5.38976	5.47048
0.0446	5.43026	5.4219	5.40633
0.04465	5.41958	5.34322	5.4879
0.0447	5.47722	5.42418	5.50557
0.04475	5.3879	5.49087	5.33086
0.0448	5.35448	5.56252	5.38265
0.04485	5.34591	5.37185	5.41192
0.0449	5.37017	5.32439	5.31521
0.04495	5.44555	5.41985	5.46685
0.045	5.2922	5.36834	5.34017
0.04505	5.5469	5.37856	5.50777
0.0451	5.40377	5.39641	5.25713
0.04515	5.33742	5.34612	5.46413
0.0452	5.35961	5.40935	5.59426
0.04525	5.42019	5.3106	5.43642
0.0453	5.55547	5.454	5.5114
0.04535	5.31948	5.35955	5.49013
0.0454	5.47292	5.41701	5.39055
0.04545	5.45723	5.34121	5.37664
0.0455	5.43724	5.27681	5.4825
0.04555	5.41649	5.45623	5.35039
0.0456	5.50365	5.35582	5.47347
0.04565	5.376	5.38573	5.48968
0.0457	5.36049	5.27913	5.43703
0.04575	5.37401	5.34368	5.41527
0.0458	5.4991	5.40282	5.39959
0.04585	5.42501	5.4211	5.46767
0.0459	5.47887	5.51134	5.48522
0.04595	5.5089	5.34041	5.40606
0.046	5.502	5.44799	5.52172
0.04605	5.52395	5.26394	5.4251
0.0461	5.42949	5.29909	5.43319
0.04615	5.4952	5.3124	5.3807
0.0462	5.50197	5.30816	5.60527
0.04625	5.41655	5.29302	5.46416
0.0463	5.39669	5.41921	5.35128
0.04635	5.37505	5.38445	5.30635
0.0464	5.31899	5.27681	5.4746
0.04645	5.37706	5.48647	5.35705
0.0465	5.32976	5.27224	5.49746
0.04655	5.42156	5.33822	5.41921
0.0466	5.39937	5.25417	5.49004
0.04665	5.46901	5.30825	5.42373
0.0467	5.53817	5.3789	5.37664
0.04675	5.454	5.49364	5.38613
0.0468	5.31542	5.41051	5.42662
0.04685	5.38909	5.32851	5.44567
0.0469	5.42565	5.23006	5.47387
0.04695	5.51375	5.34395	5.47835
0.047	5.57665	5.39947	5.32665
0.04705	5.37304	5.38698	5.39888
0.0471	5.35735	5.37572	5.41484
0.04715	5.4894	5.31811	5.3543
0.0472	5.45144	5.34771	5.40316
0.04725	5.43309	5.2473	5.34487
0.0473	5.44436	5.28002	5.45614
0.04735	5.36153	5.41832	5.34676
0.0474	5.28048	5.25933	5.37749
0.04745	5.30376	5.42046	5.38524
0.0475	5.19597	5.41384	5.54735
0.04755	5.36324	5.31176	5.47384
0.0476	5.37774	5.4197	5.41982
0.04765	5.39611	5.26879	5.42153
0.0477	5.38976	5.38237	5.29979
0.04775	5.43068	5.38097	5.46145
0.0478	5.27144	5.46276	5.36361
0.04785	5.40349	5.30462	5.43691
0.0479	5.38652	5.20025	5.37005
0.04795	5.38094	5.37682	5.33977
0.048	5.43572	5.30394	5.47817
0.04805	5.3171	5.30553	5.3138
0.0481	5.44902	5.21999	5.37417
0.04815	5.38537	5.39763	5.45037
0.0482	5.43511	5.40612	5.46868
0.04825	5.55062	5.4168	5.27688
0.0483	5.53707	5.31261	5.33141
0.04835	5.4208	5.38744	5.29964
0.0484	5.41777	5.49322	5.37526
0.04845	5.42605	5.32314	5.48147
0.0485	5.32226	5.34203	5.44286
0.04855	5.39144	5.26864	5.43676
0.0486	5.39223	5.33193	5.40926
0.04865	5.36617	5.42757	5.49727
0.0487	5.36013	5.437	5.42821
0.04875	5.38707	5.38457	5.34285
0.0488	5.39437	5.33669	5.40535
0.04885	5.57522	5.3951	5.42788
0.0489	5.38799	5.42516	5.45922
0.04895	5.31044	5.40886	5.34349
0.049	5.3948	5.32674	5.38241
0.04905	5.36602	5.26702	5.45635
0.0491	5.40136	5.34923	5.32924
0.04915	5.42693	5.33352	5.47619
0.0492	5.34405	5.27184	5.55642
0.04925	5.43636	5.32006	5.48137
0.0493	5.28988	5.39016	5.45296
0.04935	5.38347	5.28624	5.28713
0.0494	5.41662	5.37346	5.38714
0.04945	5.38298	5.31813	5.37633
0.0495	5.35076	5.38711	5.44805
0.04955	5.47432	5.4059	5.38073
0.0496	5.44301	5.26754	5.44799
0.04965	5.42293	5.28795	5.4219
0.0497	5.39446	5.35955	5.47792
0.04975	5.38637	5.28103	5.21175
0.0498	5.41655	5.31289	5.42034
0.04985	5.43703	5.4872	5.34884
0.0499	5.40191	5.44484	5.40825
0.04995	5.51638	5.20037	5.34349
0.05	5.50518	5.20101	5.29531

## Sheet: E236A ATP
mantATP binding		E236A monomer
Time (s)	Fl1	Fl2	Fl3
5e-05	2.9142	2.76146	2.94454
0.0001	2.84084	2.76305	2.89003
0.00015	2.96169	2.8246	2.89284
0.0002	2.95937	2.84593	2.89034
0.00025	3.00755	2.88036	2.9146
0.0003	2.98894	2.86537	2.90834
0.00035	2.94463	2.82274	2.95165
0.0004	2.94591	2.87001	2.91982
0.00045	3.04418	2.91826	2.93871
0.0005	3.06526	2.9333	3.04634
0.00055	3.05257	2.9059	2.9691
0.0006	3.0573	2.83962	3.06822
0.00065	3.05123	2.92824	3.09432
0.0007	3.17821	2.98738	3.06822
0.00075	3.13387	2.92067	3.10469
0.0008	3.10308	2.97313	3.07161
0.00085	3.09471	3.06066	3.13741
0.0009	3.10884	2.96144	3.19231
0.00095	3.07668	3.03987	3.20833
0.001	3.09291	2.99574	3.13295
0.00105	3.15083	3.06954	3.10707
0.0011	3.2213	3.13176	3.17885
0.00115	3.10655	3.10359	3.16158
0.0012	3.1097	3.05672	3.14324
0.00125	3.1671	3.01656	3.13728
0.0013	3.209	3.09032	3.08891
0.00135	3.21797	3.1104	3.16402
0.0014	3.30074	3.19518	3.15758
0.00145	3.21996	3.15544	3.17104
0.0015	3.2293	3.12331	3.31355
0.00155	3.19582	3.13545	3.21544
0.0016	3.27004	3.20696	3.14006
0.00165	3.21776	3.20314	3.20622
0.0017	3.32338	3.22975	3.21498
0.00175	3.28389	3.25169	3.21541
0.0018	3.2509	3.37932	3.31438
0.00185	3.31285	3.304	3.3188
0.0019	3.42757	3.29796	3.34813
0.00195	3.24965	3.3687	3.27037
0.002	3.33339	3.25215	3.34868
0.00205	3.33891	3.35426	3.27199
0.0021	3.30257	3.28926	3.38796
0.00215	3.42684	3.43215	3.28212
0.0022	3.35964	3.32964	3.3235
0.00225	3.38057	3.48842	3.43151
0.0023	3.32976	3.32549	3.35088
0.00235	3.3033	3.40297	3.35542
0.0024	3.38433	3.49373	3.38759
0.00245	3.39037	3.42635	3.37285
0.0025	3.4467	3.44335	3.37703
0.00255	3.47096	3.41426	3.3683
0.0026	3.48445	3.53218	3.40178
0.00265	3.52571	3.49556	3.45824
0.0027	3.53047	3.43468	3.4268
0.00275	3.41139	3.41374	3.53221
0.0028	3.51656	3.4539	3.47808
0.00285	3.45265	3.44194	3.5255
0.0029	3.50792	3.43321	3.46156
0.00295	3.52715	3.50313	3.49379
0.003	3.5703	3.44536	3.55565
0.00305	3.60704	3.61244	3.64678
0.0031	3.57393	3.45857	3.52953
0.00315	3.53484	3.54305	3.54149
0.0032	3.55846	3.47795	3.58385
0.00325	3.62676	3.51784	3.55483
0.0033	3.62508	3.66893	3.57997
0.00335	3.60555	3.54125	3.66753
0.0034	3.74559	3.50462	3.58376
0.00345	3.60167	3.55409	3.66084
0.0035	3.64848	3.65138	3.59422
0.00355	3.66097	3.64888	3.59642
0.0036	3.51515	3.67058	3.62019
0.00365	3.61641	3.63439	3.61882
0.0037	3.69893	3.65465	3.70754
0.00375	3.7115	3.62547	3.56215
0.0038	3.61415	3.65071	3.65242
0.00385	3.73812	3.72127	3.66307
0.0039	3.76439	3.63136	3.70281
0.00395	3.7842	3.66838	3.67305
0.004	3.68962	3.65624	3.68691
0.00405	3.73341	3.6751	3.67076
0.0041	3.76845	3.75649	3.6761
0.00415	3.73906	3.72499	3.6964
0.0042	3.69438	3.75475	3.75316
0.00425	3.73464	3.69933	3.70522
0.0043	3.8401	3.62917	3.83589
0.00435	3.7841	3.71807	3.77474
0.0044	3.79405	3.85152	3.76256
0.00445	3.80178	3.62947	3.8033
0.0045	3.7841	3.68135	3.7228
0.00455	3.75432	3.6473	3.76576
0.0046	3.77358	3.68932	3.72853
0.00465	3.77968	3.81932	3.74269
0.0047	3.79085	3.82179	3.80119
0.00475	3.82878	3.77617	3.82863
0.0048	3.84572	3.79488	3.84749
0.00485	3.77712	3.83092	3.90077
0.0049	3.85317	3.8625	3.81941
0.00495	3.92552	3.79692	3.82115
0.005	3.83354	3.79256	3.77791
0.00505	3.96898	3.81914	3.84325
0.0051	3.8998	3.86278	3.83409
0.00515	3.86162	3.75832	3.84886
0.0052	3.87801	3.87544	3.78557
0.00525	3.99718	3.90184	3.97127
0.0053	3.81438	3.81188	3.82933
0.00535	3.89937	3.81645	3.87187
0.0054	3.88146	3.88774	3.84621
0.00545	3.94319	3.86244	3.92824
0.0055	3.93095	3.85045	3.94002
0.00555	3.92278	4.03798	3.80846
0.0056	4.07787	3.88567	3.94014
0.00565	4.06182	3.92812	3.87392
0.0057	3.94746	3.92333	3.92818
0.00575	3.98387	3.95442	3.8568
0.0058	3.91707	3.91063	3.99187
0.00585	3.89644	3.8755	4.00047
0.0059	3.9568	3.93761	3.93917
0.00595	4.22454	3.90901	4.01604
0.006	4.08544	4.01225	3.86617
0.00605	3.97219	3.93218	3.96736
0.0061	4.01387	3.95207	3.99858
0.00615	3.98912	3.88512	3.97749
0.0062	4.03307	3.88704	4.01286
0.00625	4.02864	3.99059	4.00112
0.0063	4.01534	4.05443	3.94704
0.00635	4.04772	3.82994	4.0255
0.0064	4.01558	4.00075	4.05373
0.00645	4.05696	4.05446	3.98579
0.0065	4.09725	3.98873	4.02184
0.00655	3.98836	4.01616	3.95564
0.0066	4.10402	4.07094	3.96358
0.00665	4.14409	4.04738	3.98518
0.0067	4.06536	4.10228	4.16216
0.00675	4.01583	4.01433	4.2199
0.0068	4.03694	4.04946	4.02434
0.00685	4.09508	4.04903	4.11904
0.0069	4.12432	4.11324	4.05916
0.00695	4.09596	4.08132	4.06337
0.007	4.07988	4.15184	4.09514
0.00705	4.04885	4.0688	4.16481
0.0071	4.14711	4.0699	4.04396
0.00715	4.10738	4.22218	4.13121
0.0072	4.11754	4.049	4.21422
0.00725	4.1248	4.0836	4.25124
0.0073	4.19594	4.15044	4.09685
0.00735	4.07588	4.08138	4.14443
0.0074	4.12929	4.13521	4.16054
0.00745	4.21144	4.06041	4.1061
0.0075	4.31844	4.06633	4.14156
0.00755	4.24941	4.1249	4.20256
0.0076	4.12618	4.13667	4.19515
0.00765	4.25875	4.04372	4.07637
0.0077	4.14778	4.1237	4.14974
0.00775	4.19621	4.13011	4.20192
0.0078	4.24861	4.07665	4.23506
0.00785	4.10088	4.14464	4.25087
0.0079	4.25896	4.16274	4.27025
0.00795	4.19417	4.10811	4.16673
0.008	4.25612	4.25527	4.18083
0.00805	4.23928	4.33812	4.20171
0.0081	4.30193	4.15636	4.33321
0.00815	4.23232	4.15279	4.1617
0.0082	4.18245	4.25932	4.1975
0.00825	4.27116	4.18248	4.23937
0.0083	4.22667	4.16679	4.1559
0.00835	4.26347	4.21999	4.19948
0.0084	4.27635	4.29036	4.28725
0.00845	4.18276	4.18901	4.30391
0.0085	4.22646	4.24547	4.18303
0.00855	4.17696	4.28328	4.15968
0.0086	4.28014	4.13222	4.29558
0.00865	4.30156	4.19579	4.33141
0.0087	4.25243	4.31004	4.31114
0.00875	4.30336	4.2968	4.1635
0.0088	4.29469	4.29793	4.35036
0.00885	4.265	4.27388	4.30162
0.0089	4.32765	4.23964	4.37209
0.00895	4.37245	4.30168	4.21938
0.009	4.33699	4.35225	4.31578
0.00905	4.32308	4.23277	4.33629
0.0091	4.29305	4.22521	4.17418
0.00915	4.40367	4.18407	4.28786
0.0092	4.18703	4.33861	4.30077
0.00925	4.3553	4.26357	4.34645
0.0093	4.21712	4.31072	4.3185
0.00935	4.32204	4.30965	4.33986
0.0094	4.28893	4.32836	4.32875
0.00945	4.33278	4.29109	4.40035
0.0095	4.37959	4.40968	4.33772
0.00955	4.35426	4.40212	4.37401
0.0096	4.34795	4.29354	4.38063
0.00965	4.45851	4.28142	4.28191
0.0097	4.43596	4.39125	4.32918
0.00975	4.49165	4.39614	4.3615
0.0098	4.33229	4.31011	4.31523
0.00985	4.45162	4.47197	4.31532
0.0099	4.43785	4.37935	4.44472
0.00995	4.41872	4.35466	4.36064
0.01	4.39296	4.38213	4.41991
0.01005	4.39708	4.35524	4.38399
0.0101	4.47643	4.38051	4.25597
0.01015	4.31853	4.32427	4.39565
0.0102	4.37837	4.43623	4.44432
0.01025	4.46889	4.40294	4.40712
0.0103	4.41084	4.412	4.48555
0.01035	4.44887	4.40633	4.49562
0.0104	4.40334	4.4568	4.44792
0.01045	4.40422	4.29097	4.33571
0.0105	4.37178	4.39919	4.42381
0.01055	4.38365	4.43648	4.24663
0.0106	4.372	4.42131	4.42549
0.01065	4.53118	4.40535	4.51711
0.0107	4.50575	4.40297	4.37245
0.01075	4.43755	4.45345	4.49461
0.0108	4.41606	4.39583	4.40718
0.01085	4.48674	4.45265	4.46877
0.0109	4.41197	4.37786	4.38866
0.01095	4.44273	4.4623	4.48622
0.011	4.38228	4.40541	4.49855
0.01105	4.47365	4.31963	4.42058
0.0111	4.51946	4.28841	4.40798
0.01115	4.43272	4.42513	4.53786
0.0112	4.46111	4.43895	4.39821
0.01125	4.40456	4.55608	4.3965
0.0113	4.53487	4.4764	4.38033
0.01135	4.4247	4.42131	4.42915
0.0114	4.49437	4.5121	4.43199
0.01145	4.51747	4.49562	4.50923
0.0115	4.45958	4.46596	4.48345
0.01155	4.44862	4.53258	4.58772
0.0116	4.51021	4.56597	4.59844
0.01165	4.55644	4.60173	4.5367
0.0117	4.40346	4.46718	4.5009
0.01175	4.56059	4.57094	4.40938
0.0118	4.5837	4.54186	4.50966
0.01185	4.46559	4.45244	4.4959
0.0119	4.51775	4.49666	4.55425
0.01195	4.53826	4.57405	4.63011
0.012	4.51183	4.46996	4.4998
0.01205	4.56715	4.5176	4.46846
0.0121	4.65498	4.56285	4.43981
0.01215	4.64806	4.56987	4.59288
0.0122	4.61614	4.63539	4.64711
0.01225	4.61769	4.60457	4.60368
0.0123	4.62477	4.56441	4.5595
0.01235	4.5519	4.50841	4.68828
0.0124	4.61455	4.6313	4.63075
0.01245	4.53288	4.6003	4.57976
0.0125	4.55202	4.58983	4.61797
0.01255	4.57356	4.6057	4.54555
0.0126	4.52583	4.55409	4.5064
0.01265	4.52818	4.56468	4.65184
0.0127	4.60826	4.58003	4.60671
0.01275	4.60918	4.67958	4.56658
0.0128	4.64757	4.45564	4.5067
0.01285	4.5862	4.5385	4.4915
0.0129	4.67549	4.48265	4.60164
0.01295	4.61055	4.57387	4.64553
0.013	4.60436	4.65486	4.64491
0.01305	4.7079	4.59847	4.51537
0.0131	4.51259	4.55339	4.6259
0.01315	4.58885	4.58177	4.4821
0.0132	4.62572	4.6407	4.63371
0.01325	4.69451	4.57243	4.58223
0.0133	4.60353	4.67293	4.68974
0.01335	4.61504	4.55458	4.53288
0.0134	4.631	4.51997	4.60225
0.01345	4.6628	4.65935	4.57186
0.0135	4.68465	4.56941	4.56542
0.01355	4.68611	4.62279	4.62422
0.0136	4.61968	4.54057	4.53053
0.01365	4.65825	4.662	4.65529
0.0137	4.73833	4.60018	4.68691
0.01375	4.68095	4.55178	4.62114
0.0138	4.53993	4.58901	4.45827
0.01385	4.60875	4.60668	4.58281
0.0139	4.79805	4.70638	4.59834
0.01395	4.67732	4.67626	4.69118
0.014	4.67464	4.59954	4.68923
0.01405	4.69829	4.67861	4.62892
0.0141	4.57851	4.619	4.77751
0.01415	4.63268	4.63469	4.71065
0.0142	4.66646	4.64427	4.60149
0.01425	4.68181	4.66603	4.55678
0.0143	4.68007	4.71144	4.59395
0.01435	4.64708	4.72835	4.76979
0.0144	4.65047	4.59426	4.59905
0.01445	4.67708	4.64183	4.75627
0.0145	4.69435	4.67772	4.66152
0.01455	4.69686	4.67186	4.69237
0.0146	4.63234	4.63439	4.72328
0.01465	4.60719	4.69115	4.67836
0.0147	4.67073	4.71138	4.60942
0.01475	4.77181	4.60118	4.71694
0.0148	4.6942	4.69768	4.64507
0.01485	4.7581	4.67021	4.72933
0.0149	4.65456	4.5435	4.66716
0.01495	4.66451	4.79436	4.75893
0.015	4.71562	4.66789	4.63716
0.01505	4.71285	4.65712	4.6859
0.0151	4.67708	4.70805	4.70189
0.01515	4.76518	4.80162	4.77623
0.0152	4.74632	4.72017	4.52294
0.01525	4.73732	4.69475	4.61998
0.0153	4.65792	4.54735	4.68309
0.01535	4.73915	4.5948	4.82097
0.0154	4.64128	4.6895	4.71605
0.01545	4.68684	4.68218	4.7115
0.0155	4.72044	4.69829	4.7068
0.01555	4.76232	4.66475	4.72777
0.0156	4.69136	4.63194	4.64784
0.01565	4.69658	4.66808	4.61592
0.0157	4.75826	4.81419	4.7469
0.01575	4.68581	4.77321	4.79222
0.0158	4.71572	4.787	4.69664
0.01585	4.73058	4.71877	4.84343
0.0159	4.7773	4.81017	4.65349
0.01595	4.81676	4.78447	4.74919
0.016	4.73357	4.88829	4.7458
0.01605	4.84285	4.75877	4.75279
0.0161	4.72832	4.76445	4.76573
0.01615	4.68001	4.69057	4.68996
0.0162	4.76818	4.64275	4.63899
0.01625	4.786	4.80055	4.81502
0.0163	4.81667	4.62373	4.84996
0.01635	4.79152	4.76927	4.79903
0.0164	4.7321	4.7401	4.84673
0.01645	4.73421	4.76473	4.6317
0.0165	4.92397	4.75469	4.76186
0.01655	4.84764	4.88558	4.77852
0.0166	4.73036	4.76732	4.75023
0.01665	4.7625	4.75203	4.76567
0.0167	4.76485	4.89375	4.74056
0.01675	4.80388	4.79079	4.80928
0.0168	4.78322	4.83687	4.8048
0.01685	4.82655	4.67455	4.80241
0.0169	4.86131	4.68883	4.81859
0.01695	4.87685	4.70882	4.77336
0.017	4.84184	4.74761	4.81407
0.01705	4.84065	4.80455	4.73085
0.0171	4.83864	4.69533	4.83455
0.01715	4.77419	4.67269	4.78166
0.0172	4.8084	4.72579	4.77486
0.01725	4.74324	4.81935	4.79817
0.0173	4.81481	4.74031	4.74205
0.01735	4.86168	4.75072	4.73637
0.0174	4.91161	4.85674	4.89488
0.01745	4.78224	4.76796	4.82701
0.0175	4.77675	4.73628	4.74184
0.01755	4.72398	4.83449	4.72273
0.0176	4.83687	4.83702	4.82814
0.01765	4.83931	4.82927	4.83571
0.0177	4.88097	4.84258	4.83135
0.01775	4.79689	4.8019	4.77898
0.0178	4.76894	4.77034	4.81572
0.01785	4.85231	4.84496	4.72084
0.0179	4.80602	4.75252	4.81502
0.01795	4.87724	4.76909	4.73003
0.018	4.87337	4.88686	4.76857
0.01805	4.829	4.71556	4.83833
0.0181	4.88008	4.78346	4.81862
0.01815	4.80153	4.81191	4.79589
0.0182	4.9449	4.86714	4.80318
0.01825	4.71108	4.80507	4.843
0.0183	4.80907	4.85521	4.76381
0.01835	4.83763	4.76912	4.81621
0.0184	4.81123	4.79067	4.8647
0.01845	4.91655	4.82375	4.67009
0.0185	4.87944	4.83657	4.86638
0.01855	4.78261	4.83827	4.88561
0.0186	4.87831	4.74938	4.82069
0.01865	4.92143	4.82665	4.85292
0.0187	4.92626	4.83324	4.82796
0.01875	4.92183	4.83568	4.80632
0.0188	4.86604	4.63564	4.68767
0.01885	4.83864	4.74928	4.83962
0.0189	4.88292	4.8253	4.78679
0.01895	4.87453	4.9214	4.90209
0.019	4.83873	4.82927	4.9413
0.01905	4.81954	4.90932	4.80144
0.0191	4.92641	4.80977	4.80235
0.01915	4.93694	4.87145	4.80159
0.0192	4.89134	4.78612	4.8532
0.01925	4.86763	4.84389	4.75951
0.0193	4.95809	4.7874	4.81529
0.01935	4.9189	4.86376	4.82894
0.0194	4.88121	4.80129	4.91322
0.01945	4.90993	4.83803	4.88912
0.0195	4.95171	4.87728	4.79949
0.01955	4.9218	4.81429	4.74269
0.0196	4.90291	4.82833	4.9041
0.01965	5.01753	4.8752	4.96275
0.0197	4.94548	4.99596	4.85426
0.01975	4.89153	4.8235	4.83263
0.0198	4.87758	4.76711	4.89104
0.01985	4.81157	4.83336	4.74428
0.0199	4.99169	4.8474	4.89
0.01995	4.93025	4.86385	4.88307
0.02	4.9438	4.9391	4.90761
0.02005	4.83287	4.89928	4.97551
0.0201	5.01628	4.91985	4.88701
0.02015	4.94127	4.93709	4.81032
0.0202	4.959	4.88323	4.81676
0.02025	4.97643	4.93791	4.96239
0.0203	4.87917	4.86504	4.75066
0.02035	4.99022	4.88988	4.85341
0.0204	4.87001	4.93447	4.95677
0.02045	4.94908	4.99461	4.84664
0.0205	4.93187	4.89916	4.8803
0.02055	4.92076	4.88588	4.95143
0.0206	4.89092	4.88179	4.80007
0.02065	4.96739	4.92632	4.83516
0.0207	4.90599	4.93169	4.83727
0.02075	5.00533	4.8907	4.88005
0.0208	4.93453	4.9073	4.85213
0.02085	4.96111	4.91777	4.92354
0.0209	5.04143	4.79698	4.90498
0.02095	5.02498	5.00725	4.88023
0.021	4.95552	4.97252	5.02104
0.02105	4.97334	4.97136	4.77538
0.0211	5.01116	4.95552	4.93868
0.02115	4.97655	4.96181	5.04015
0.0212	4.92961	4.90489	4.85719
0.02125	4.89888	5.03438	4.93007
0.0213	4.99544	4.99727	4.93623
0.02135	5.04949	4.99767	4.89717
0.0214	4.80553	4.89513	4.84963
0.02145	4.92385	4.92754	4.93389
0.0215	4.93684	4.85896	4.97124
0.02155	4.93941	4.94917	4.97637
0.0216	4.96004	4.92607	4.94151
0.02165	5.02144	4.93434	4.95879
0.0217	4.93904	4.90086	4.78081
0.02175	4.92372	4.85497	4.94438
0.0218	4.94634	4.8542	4.97664
0.02185	4.9695	5.07008	4.95094
0.0219	4.83418	4.98323	4.99562
0.02195	5.05336	5.00057	5.01549
0.022	4.98433	5.00609	4.87981
0.02205	5.07146	4.88704	4.93318
0.0221	5.04543	4.78557	4.8683
0.02215	4.86885	4.90907	4.85997
0.0222	5.00173	4.86989	4.97524
0.02225	5.02623	4.95561	4.88478
0.0223	5.01619	4.92723	4.95754
0.02235	5.00093	4.90886	4.9409
0.0224	5.00862	4.92201	4.87309
0.02245	4.84334	4.93837	4.9756
0.0225	4.94142	4.99422	4.93105
0.02255	4.96065	4.89089	5.01882
0.0226	4.94139	4.92269	5.06639
0.02265	5.07393	4.92513	4.96239
0.0227	5.04061	5.0844	4.97929
0.02275	5.08949	4.96929	4.97005
0.0228	5.08745	4.95113	4.96547
0.02285	5.05834	4.87148	4.87999
0.0229	4.94222	4.98207	4.97685
0.02295	4.99745	4.8933	4.81236
0.023	4.96852	4.94548	4.94988
0.02305	5.10207	4.93269	4.97707
0.0231	5.01787	5.02059	4.97356
0.02315	4.99959	4.95772	4.96202
0.0232	4.90526	4.94679	4.95326
0.02325	4.94804	4.93477	4.93788
0.0233	4.95757	4.83931	4.93303
0.02335	4.97911	4.97331	5.00649
0.0234	5.05004	4.8355	4.93523
0.02345	4.97731	4.92851	4.9439
0.0235	5.03136	4.99339	4.93471
0.02355	5.0157	4.98534	4.95845
0.0236	5.06413	4.86495	4.91509
0.02365	4.93953	4.91127	4.95467
0.0237	4.97786	4.93672	4.86534
0.02375	4.88332	4.92436	4.86125
0.0238	4.98104	5.09789	4.89269
0.02385	5.06392	4.89327	4.87843
0.0239	5.11156	5.01772	4.91939
0.02395	4.97417	4.9514	4.99004
0.024	4.99095	4.93663	4.95467
0.02405	5.05647	4.97218	4.93599
0.0241	4.99611	4.95427	4.92281
0.02415	4.94036	4.93819	4.92052
0.0242	4.9175	5.02437	4.98073
0.02425	4.92125	4.99758	5.01405
0.0243	5.10979	4.94463	5.01256
0.02435	4.99996	4.92882	4.9854
0.0244	5.00636	5.03371	4.89672
0.02445	4.91829	5.01647	4.94292
0.0245	5.00051	5.06773	5.04381
0.02455	4.9572	4.91448	4.95842
0.0246	4.97771	4.95891	4.9807
0.02465	5.07658	4.911	4.95738
0.0247	5.10857	5.00807	5.00328
0.02475	4.9829	4.89897	4.88445
0.0248	5.00136	4.83864	5.06279
0.02485	5.00551	5.01955	5.0222
0.0249	5.02886	5.09963	4.96807
0.02495	4.93526	5.00819	5.03093
0.025	5.00655	4.9735	5.05501
0.02505	5.12532	5.04811	4.94161
0.0251	5.09474	4.93831	4.99697
0.02515	5.07002	4.9475	5.08583
0.0252	5.07277	5.01701	4.90398
0.02525	5.04887	5.08794	4.93657
0.0253	4.88265	5.06844	4.91222
0.02535	4.95479	5.07097	4.93328
0.0254	5.0255	4.94289	4.99858
0.02545	5.01912	5.03682	5.00847
0.0255	5.13933	5.03096	5.08299
0.02555	4.97704	4.99339	5.06307
0.0256	5.09026	4.90953	5.07573
0.02565	5.1415	5.00868	5.0016
0.0257	5.01009	5.06835	5.04826
0.02575	5.04976	4.99788	4.97066
0.0258	5.09334	4.94609	5.06474
0.02585	5.06581	5.02632	4.92595
0.0259	4.9641	4.9052	5.13216
0.02595	5.04921	5.0775	5.0259
0.026	4.95503	4.99825	5.03502
0.02605	4.90956	5.02577	5.06661
0.0261	4.98991	5.08785	5.03737
0.02615	5.0645	4.97304	5.11489
0.0262	5.14119	4.99535	4.99379
0.02625	4.94145	5.03456	5.09325
0.0263	5.01302	5.08495	4.98406
0.02635	5.16704	5.04628	5.0522
0.0264	5.10393	5.09303	4.97527
0.02645	5.09865	4.99642	5.07356
0.0265	5.00661	5.04173	5.03218
0.02655	5.04842	5.04671	5.04857
0.0266	5.03294	5.11327	4.96956
0.02665	4.99822	4.95992	5.03023
0.0267	5.07262	5.0811	5.10515
0.02675	5.09007	5.0728	5.02065
0.0268	4.91222	5.01488	5.06392
0.02685	5.06584	5.05947	5.02162
0.0269	4.99599	4.98491	5.01833
0.02695	5.01457	5.05153	4.96279
0.027	5.16176	5.01454	4.9922
0.02705	5.05879	4.96358	5.01085
0.0271	5.06639	4.96413	5.08766
0.02715	5.07741	4.99214	5.13936
0.0272	5.17262	4.94078	5.11845
0.02725	5.07158	4.97627	4.99449
0.0273	5.08467	5.09068	5.04741
0.02735	5.09404	5.07671	4.92137
0.0274	5.01705	5.01973	5.04564
0.02745	4.91326	4.93807	4.89571
0.0275	5.00786	5.03838	5.10384
0.02755	5.00121	5.03844	5.10289
0.0276	5.03859	5.05116	5.07463
0.02765	5.08455	5.01256	4.96678
0.0277	5.06566	5.04985	5.05095
0.02775	5.09435	4.89223	5.0287
0.0278	5.07314	4.97237	5.08177
0.02785	5.09981	4.9362	5.07909
0.0279	5.02077	4.94133	5.0916
0.02795	5.0623	5.02828	4.94829
0.028	5.0995	5.08531	5.11128
0.02805	4.91164	5.07723	5.0193
0.0281	5.0172	4.9381	4.9215
0.02815	5.10252	4.98073	5.09969
0.0282	5.101	5.1201	4.87584
0.02825	5.10686	5.05089	5.03285
0.0283	5.06349	4.9395	5.13579
0.02835	5.00984	5.05779	5.04332
0.0284	5.12746	4.9315	5.10997
0.02845	5.05504	4.9655	4.96755
0.0285	5.0493	5.02739	5.03676
0.02855	5.07259	5.00011	5.04146
0.0286	5.14583	4.99111	5.01201
0.02865	5.08366	4.95961	4.99272
0.0287	5.04122	5.05431	4.85194
0.02875	5.06548	5.00017	5.11827
0.0288	5.03365	5.05217	5.02822
0.02885	5.10628	5.09969	5.15907
0.0289	5.08684	5.18157	4.95677
0.02895	5.144	5.12126	5.01811
0.029	4.94982	5.07646	5.06362
0.02905	5.11693	5.11681	5.09737
0.0291	5.04704	5.23854	5.00618
0.02915	5.09657	5.05983	5.04274
0.0292	5.14284	5.03704	4.95171
0.02925	5.06874	5.05074	5.00313
0.0293	5.13185	5.11104	5.10015
0.02935	5.13881	5.02229	5.1599
0.0294	5.07549	5.13149	4.98702
0.02945	5.13478	5.0277	5.09603
0.0295	5.1577	5.00493	5.13664
0.02955	5.07753	5.03542	4.97093
0.0296	4.97337	5.05092	4.96059
0.02965	4.98934	5.06706	5.05861
0.0297	4.9977	5.09285	5.17198
0.02975	5.06432	5.01256	5.13127
0.0298	5.088	5.092	5.13316
0.02985	4.98943	5.15029	5.02825
0.0299	5.18083	5.02184	4.94625
0.02995	5.07701	5.06551	5.11696
0.03	5.08263	4.95653	5.1068
0.03005	5.0692	5.09038	5.15349
0.0301	5.13188	5.16423	4.99742
0.03015	5.17198	5.10787	5.05718
0.0302	5.15093	5.07332	4.99925
0.03025	5.12911	5.1649	4.97194
0.0303	5.07127	5.11391	5.09309
0.03035	5.10304	5.16249	5.07994
0.0304	5.13564	5.09722	4.95741
0.03045	5.15962	5.1563	5.01903
0.0305	5.10274	5.06856	5.21983
0.03055	5.13316	5.05782	4.97499
0.0306	5.04823	5.06771	4.99751
0.03065	5.12978	5.04485	5.01521
0.0307	5.03478	5.15383	5.09462
0.03075	5.24141	5.07347	5.09758
0.0308	5.14452	5.14806	5.09856
0.03085	5.24358	4.96626	4.99065
0.0309	5.10762	5.09389	4.98476
0.03095	5.05229	5.05223	5.06423
0.031	4.98079	5.1874	5.13063
0.03105	4.96614	5.06807	5.05019
0.0311	5.09462	5.25231	5.08934
0.03115	5.06624	5.07674	5.08122
0.0312	5.20375	5.04506	5.02114
0.03125	5.15895	5.12111	5.11165
0.0313	5.12441	5.14739	4.99294
0.03135	5.08666	5.17665	5.12236
0.0314	5.17275	5.09947	5.14192
0.03145	5.12547	5.12514	5.17674
0.0315	5.09282	5.17928	5.04286
0.03155	5.1462	5.2372	5.11882
0.0316	5.19283	5.03612	5.22374
0.03165	5.14586	5.14952	5.14507
0.0317	5.12721	5.23039	5.04033
0.03175	5.09404	5.1183	5.1881
0.0318	5.14678	5.04698	5.1361
0.03185	5.13298	5.09294	5.06636
0.0319	5.21678	5.08391	5.16521
0.03195	5.12285	5.20464	5.0602
0.032	5.11958	5.08055	5.04549
0.03205	4.98277	5.10259	5.04628
0.0321	5.06017	5.01729	5.19728
0.03215	5.09392	5.08135	5.1472
0.0322	5.0443	5.09892	5.04122
0.03225	5.0721	5.1877	4.97145
0.0323	5.17976	5.17961	5.10503
0.03235	5.21437	5.10069	5.23699
0.0324	5.16707	5.12309	5.06383
0.03245	5.09081	5.127	5.05293
0.0325	5.11855	5.15633	5.12084
0.03255	5.12401	5.12203	5.00585
0.0326	5.08299	4.99382	5.12483
0.03265	5.07186	5.15889	5.08431
0.0327	5.29128	5.14861	4.97942
0.03275	5.15755	5.21416	5.1021
0.0328	5.05223	5.11711	5.15242
0.03285	5.13588	5.04601	5.09026
0.0329	5.16008	5.04338	5.11122
0.03295	5.20793	5.06648	5.09245
0.033	5.18413	5.10048	5.06246
0.03305	5.10875	5.1086	5.00273
0.0331	5.17037	5.04131	5.15096
0.03315	5.09435	5.05214	5.10622
0.0332	5.07759	5.13014	4.99269
0.03325	5.09654	5.12434	5.11168
0.0333	5.14174	5.0797	5.03127
0.03335	4.95705	5.13658	5.12941
0.0334	5.14076	5.13454	5.06481
0.03345	5.24074	5.13729	5.16966
0.0335	5.2134	5.20622	5.10661
0.03355	5.07369	5.18105	5.00292
0.0336	5.03652	5.14699	5.14406
0.03365	5.10161	5.13225	5.12593
0.0337	5.26042	5.2274	5.07066
0.03375	5.1461	5.15743	5.11339
0.0338	5.19872	5.20961	5.12401
0.03385	5.1191	5.24724	5.07799
0.0339	5.05113	5.08711	5.07939
0.03395	5.18056	5.0613	5.17812
0.034	5.22411	5.19206	5.15727
0.03405	5.15184	5.15044	5.03639
0.0341	5.13167	5.15553	5.03929
0.03415	5.21941	5.07387	5.0977
0.0342	5.21788	5.17177	5.03252
0.03425	5.06343	5.09059	5.09276
0.0343	5.11385	5.20326	5.08733
0.03435	5.17412	5.06923	5.1592
0.0344	5.07118	5.20525	5.079
0.03445	5.16982	5.09251	5.20036
0.0345	5.21971	5.04213	5.1151
0.03455	5.18715	5.01436	5.05016
0.0346	5.10378	5.05449	5.04973
0.03465	5.1422	5.18776	5.07787
0.0347	5.07488	5.07942	5.00569
0.03475	5.20601	5.08373	5.18285
0.0348	5.08657	5.12807	5.23683
0.03485	5.18871	5.17516	5.09474
0.0349	5.19194	5.04747	5.0847
0.03495	5.1725	5.14327	5.0323
0.035	5.22716	5.08202	5.15801
0.03505	5.19725	5.16127	5.18816
0.0351	5.20903	5.19393	5.15422
0.03515	4.96559	5.14009	5.07955
0.0352	5.20931	5.08318	5.07723
0.03525	5.14769	5.19627	5.17125
0.0353	5.14842	5.18422	5.13542
0.03535	5.19396	5.10069	5.15126
0.0354	5.10912	5.05013	5.13085
0.03545	5.07396	5.13191	5.06294
0.0355	5.15444	5.07622	5.10237
0.03555	5.17284	5.18224	5.14433
0.0356	5.10338	5.15273	5.07921
0.03565	5.33528	5.23928	5.10951
0.0357	5.12697	5.10561	5.21013
0.03575	5.15968	5.15074	5.19478
0.0358	5.16271	5.14577	5.18706
0.03585	5.19151	5.1638	5.09752
0.0359	5.13561	5.06609	5.19804
0.03595	5.17967	5.10994	5.09297
0.036	5.1787	5.11394	5.13258
0.03605	5.17085	5.12514	5.11784
0.0361	5.05199	5.07555	5.04637
0.03615	5.10878	5.27065	5.11443
0.0362	5.17284	5.29924	5.17787
0.03625	5.09728	5.2051	5.22942
0.0363	5.21358	5.18501	5.01525
0.03635	5.25875	5.12978	5.12551
0.0364	5.25063	5.04311	5.06947
0.03645	5.12456	5.10121	5.18678
0.0365	5.25145	5.157	5.07564
0.03655	5.11928	5.04344	5.1509
0.0366	5.11214	5.1895	5.13216
0.03665	5.15572	5.1891	5.11665
0.0367	5.17778	5.22307	5.10246
0.03675	5.18312	5.12178	5.29454
0.0368	5.23241	5.20427	5.0519
0.03685	5.14244	5.12883	5.15514
0.0369	5.13646	5.12627	5.0118
0.03695	5.15447	5.21858	5.16387
0.037	5.16997	5.05101	5.19801
0.03705	5.12889	5.19603	5.15968
0.0371	5.13747	5.22637	5.23769
0.03715	5.23674	5.23458	5.12288
0.0372	5.14449	5.19417	5.10491
0.03725	5.29204	5.21883	4.98485
0.0373	5.17201	5.1779	5.17152
0.03735	5.18843	5.16777	5.08916
0.0374	5.26216	5.26332	5.21163
0.03745	5.07723	5.18657	5.14961
0.0375	5.15016	5.24385	5.07051
0.03755	5.21163	5.04256	5.26058
0.0376	5.23424	5.18077	5.06062
0.03765	5.12929	5.12456	5.16756
0.0377	5.13249	5.15712	5.18413
0.03775	5.23195	5.09056	5.14235
0.0378	5.13786	5.22438	5.11537
0.03785	5.15209	5.17561	5.11864
0.0379	5.11519	5.07497	5.07597
0.03795	5.21703	5.14733	5.10347
0.038	5.27303	5.1194	5.08659
0.03805	5.2086	5.1155	5.05361
0.0381	5.22939	5.16655	5.10262
0.03815	5.16737	5.27153	5.05638
0.0382	5.15559	5.14211	5.12462
0.03825	5.20772	5.15422	4.99739
0.0383	5.31804	5.22218	5.10918
0.03835	5.11611	5.09575	5.13701
0.0384	5.24703	5.17912	5.11669
0.03845	5.15636	5.03771	5.13667
0.0385	5.15911	5.19979	5.11522
0.03855	5.07158	5.18346	5.13912
0.0386	5.11293	5.13844	5.11681
0.03865	5.19631	5.22267	5.15209
0.0387	5.13796	5.25051	5.16204
0.03875	5.09251	5.23689	5.07482
0.0388	5.2531	5.14568	5.13036
0.03885	5.13698	5.21953	4.96669
0.0389	5.2148	5.24159	5.15901
0.03895	5.27709	5.15727	5.16844
0.039	5.16454	5.28816	5.13127
0.03905	5.18224	5.20793	5.16637
0.0391	5.20204	5.16332	5.37923
0.03915	5.16954	5.19182	5.19014
0.0392	5.16326	5.09499	5.21944
0.03925	5.20418	5.12328	5.14601
0.0393	5.14766	5.05068	5.11345
0.03935	5.18272	5.11836	5.21611
0.0394	5.11025	5.16435	5.19078
0.03945	5.19814	5.06297	5.27858
0.0395	5.19988	5.14928	5.13832
0.03955	5.20696	5.13405	5.15154
0.0396	5.21562	5.29808	5.11745
0.03965	5.2451	5.12816	5.1768
0.0397	5.15456	5.06282	5.09593
0.03975	5.2115	5.22127	5.23497
0.0398	5.14049	5.119	5.1361
0.03985	5.21101	5.24324	5.06096
0.0399	5.10436	5.15001	5.04823
0.03995	5.1855	5.14443	5.10796
0.04	5.17085	5.16075	5.28328
0.04005	5.17116	5.06685	5.20537
0.0401	5.19957	5.12569	5.11485
0.04015	5.09365	5.18514	5.2679
0.0402	5.12679	5.06471	5.12883
0.04025	5.22133	5.16167	5.18193
0.0403	5.12715	5.09776	5.16081
0.04035	5.27788	5.12114	5.12074
0.0404	5.25246	5.08641	5.15654
0.04045	5.20995	5.15309	5.14742
0.0405	5.29198	5.1353	5.20448
0.04055	5.23	5.23009	5.12593
0.0406	5.26955	5.21974	5.38097
0.04065	5.20662	5.23113	5.0786
0.0407	5.22356	5.10399	5.15236
0.04075	5.23665	5.08647	5.14516
0.0408	5.22441	5.14623	5.14653
0.04085	5.23247	5.10237	5.05345
0.0409	5.20674	5.15029	5.18294
0.04095	5.26573	5.14183	5.20241
0.041	5.17797	5.28563	5.15422
0.04105	5.39696	5.23265	5.12206
0.0411	5.22908	5.35637	5.12218
0.04115	5.22066	5.15794	5.32982
0.0412	5.10896	5.29802	5.14812
0.04125	5.28462	5.24071	5.18193
0.0413	5.16545	5.17232	5.17323
0.04135	5.25307	5.25347	5.17152
0.0414	5.25282	5.2137	5.02614
0.04145	5.23567	5.11135	5.09035
0.0415	5.30821	5.17159	5.25621
0.04155	5.24361	5.20033	5.17418
0.0416	5.17116	5.08284	5.26845
0.04165	5.25621	5.39238	5.15596
0.0417	5.32201	5.26363	5.20595
0.04175	5.19454	5.20616	5.17836
0.0418	5.22942	5.07439	5.1852
0.04185	5.21828	5.16539	5.18932
0.0419	5.2267	5.2325	5.23668
0.04195	5.1855	5.19496	5.18651
0.042	5.21819	5.22029	5.1042
0.04205	5.30336	5.16844	5.10759
0.0421	5.14995	5.12828	5.11327
0.04215	5.23036	5.17739	5.16484
0.0422	5.18965	5.02916	5.07381
0.04225	5.23354	5.32646	5.20024
0.0423	5.11891	5.25737	5.13887
0.04235	5.09642	5.18334	5.19087
0.0424	5.21105	5.10753	5.12373
0.04245	5.11803	5.17973	5.19481
0.0425	5.24236	5.26625	5.15273
0.04255	5.22301	5.12587	5.12383
0.0426	5.18022	5.26143	5.17909
0.04265	5.31264	5.25169	5.05061
0.0427	5.26	5.22878	5.27507
0.04275	5.20894	5.19719	5.22096
0.0428	5.20922	5.14351	5.25465
0.04285	5.1715	5.217	5.12383
0.0429	5.28044	5.25835	5.11519
0.04295	5.26067	5.23183	5.01527
0.043	5.15273	5.18779	5.17262
0.04305	5.2401	5.13707	5.00484
0.0431	5.2928	5.24349	5.18926
0.04315	5.31041	5.23073	5.27324
0.0432	5.18932	5.24202	5.12532
0.04325	5.24162	5.24489	5.16197
0.0433	5.21388	5.23619	5.13051
0.04335	5.34526	5.32454	5.174
0.0434	5.34554	5.21077	5.24736
0.04345	5.21053	5.15242	5.12932
0.0435	5.27971	5.19292	5.1671
0.04355	5.17122	5.19838	5.17241
0.0436	5.28246	5.11913	5.11342
0.04365	5.19206	5.14452	5.10652
0.0437	5.24519	5.26497	5.10619
0.04375	5.22582	5.16576	5.16063
0.0438	5.12087	5.12581	5.17479
0.04385	5.26396	5.25917	5.13588
0.0439	5.09728	5.12721	5.08019
0.04395	5.16631	5.24974	5.09444
0.044	5.16707	5.08296	5.04393
0.04405	5.27495	5.25847	5.06163
0.0441	5.14101	5.24165	5.12334
0.04415	5.24928	5.27944	5.07933
0.0442	5.11589	5.17958	5.26143
0.04425	5.30391	5.21687	5.08836
0.0443	5.16069	5.16332	5.06676
0.04435	5.3355	5.21236	5.27361
0.0444	5.27043	5.15636	5.12227
0.04445	5.21819	5.27068	5.21587
0.0445	5.26216	5.19881	5.13719
0.04455	5.26006	5.2596	5.14183
0.0446	5.24147	5.28993	5.16304
0.04465	5.19264	5.16676	5.1129
0.0447	5.21886	5.22649	5.07823
0.04475	5.19444	5.12404	5.25289
0.0448	5.23125	5.16783	5.22624
0.04485	5.34981	5.23949	5.19914
0.0449	5.23613	5.35024	5.23097
0.04495	5.28743	5.27321	5.11852
0.045	5.19985	5.25618	5.12978
0.04505	5.16313	5.15962	5.18123
0.0451	5.21813	5.35576	5.19475
0.04515	5.25377	5.30241	5.13533
0.0452	5.2917	5.22383	5.19808
0.04525	5.2383	5.32787	5.04048
0.0453	5.25447	5.23204	5.10176
0.04535	5.18269	5.19313	5.18508
0.0454	5.22273	5.22023	5.08577
0.04545	5.29302	5.16927	5.13063
0.0455	5.27092	5.22359	5.11388
0.04555	5.19304	5.19923	5.2748
0.0456	5.19753	5.19835	5.12843
0.04565	5.31035	5.23543	5.16146
0.0457	5.2087	5.20006	5.27608
0.04575	5.31008	5.12056	5.20866
0.0458	5.27898	5.1996	5.08748
0.04585	5.22853	5.19801	5.17247
0.0459	5.29021	5.35167	5.14284
0.04595	5.196	5.15727	5.23909
0.046	5.27199	5.18038	5.28948
0.04605	5.21471	5.17705	5.01586
0.0461	5.30654	5.26329	5.12328
0.04615	5.09706	5.16289	5.23378
0.0462	5.23683	5.32225	5.2329
0.04625	5.17091	5.39476	5.07738
0.0463	5.23003	5.15962	5.19808
0.04635	5.2534	5.29094	5.26586
0.0464	5.2462	5.26375	5.27803
0.04645	5.25505	5.32677	5.28468
0.0465	5.24996	5.23204	5.14211
0.04655	5.28795	5.31584	5.19219
0.0466	5.25224	5.17381	5.13814
0.04665	5.1686	5.24812	5.11025
0.0467	5.39281	5.23375	5.31221
0.04675	5.24495	5.20104	5.20357
0.0468	5.26415	5.31654	5.04717
0.04685	5.2578	5.25011	5.22237
0.0469	5.21697	5.1566	5.17238
0.04695	5.19963	5.06282	5.18504
0.047	5.26717	5.20543	5.25475
0.04705	5.18968	5.27315	5.1353
0.0471	5.22121	5.20183	5.07918
0.04715	5.23702	5.18187	5.18773
0.0472	5.23909	5.16383	5.18721
0.04725	5.18193	5.22225	5.18764
0.0473	5.34169	5.20644	5.31041
0.04735	5.3167	5.28713	5.17644
0.0474	5.29518	5.23769	5.12184
0.04745	5.37755	5.30037	5.15172
0.0475	5.25643	5.16933	5.15303
0.04755	5.30199	5.31322	5.2209
0.0476	5.3084	5.24327	5.17986
0.04765	5.22862	5.08922	5.18242
0.0477	5.25112	5.22261	5.09017
0.04775	5.14943	5.23677	5.09343
0.0478	5.34221	5.34325	5.17601
0.04785	5.278	5.25536	5.2104
0.0479	5.27397	5.15587	5.24422
0.04795	5.28356	5.17983	5.1733
0.048	5.35286	5.24446	5.21431
0.04805	5.29222	5.24184	5.25694
0.0481	5.37181	5.16683	5.19536
0.04815	5.23091	5.21748	5.14397
0.0482	5.22948	5.33452	5.09505
0.04825	5.3	5.2737	5.19905
0.0483	5.38979	5.18654	5.27529
0.04835	5.27529	5.24892	5.16127
0.0484	5.23888	5.17339	5.17458
0.04845	5.29411	5.18724	5.20662
0.0485	5.20503	5.15764	5.12847
0.04855	5.26537	5.22844	5.0385
0.0486	5.16371	5.29943	5.15898
0.04865	5.13994	5.22081	5.22841
0.0487	5.23824	5.27297	5.11769
0.04875	5.23076	5.30837	5.15935
0.0488	5.27126	5.32982	5.04399
0.04885	5.20146	5.37184	5.12074
0.0489	5.35198	5.28557	5.20265
0.04895	5.22627	5.16762	5.16097
0.049	5.17912	5.17311	5.35042
0.04905	5.33562	5.20277	5.26714
0.0491	5.36525	5.19979	5.23863
0.04915	5.3477	5.2437	5.21239
0.0492	5.32268	5.17858	5.30284
0.04925	5.37798	5.32015	5.03346
0.0493	5.3738	5.2256	5.20552
0.04935	5.16487	5.17534	5.26271
0.0494	5.33266	5.24571	5.13466
0.04945	5.29589	5.24669	5.06893
0.0495	5.32964	5.21419	5.21425
0.04955	5.34749	5.1606	5.22185
0.0496	5.25582	5.23341	5.15898
0.04965	5.26912	5.32588	5.16118
0.0497	5.27547	5.26112	5.1245
0.04975	5.24306	5.3051	5.24153
0.0498	5.14855	5.2538	5.24608
0.04985	5.3625	5.27101	5.10634
0.0499	5.21742	5.29286	5.26094
0.04995	5.25618	5.22484	4.99724
0.05	5.31139	5.19417	5.04064

## Sheet: E236A ADP
mantADP binding		E236A monomer
Time (s)	Fl1	Fl2	Fl3
5e-05	4.33413	4.16958	4.29409
0.0001	4.19	4.25591	4.23297
0.00015	4.19744	4.14626	4.16952
0.0002	4.37585	4.2301	4.25729
0.00025	4.30743	4.28451	4.31262
0.0003	4.26647	4.22024	4.34564
0.00035	4.33019	4.2521	4.24474
0.0004	4.32589	4.36398	4.36688
0.00045	4.37631	4.39575	4.29144
0.0005	4.28668	4.41299	4.33706
0.00055	4.42812	4.29098	4.27749
0.0006	4.49237	4.24887	4.31552
0.00065	4.3959	4.36532	4.34344
0.0007	4.41692	4.36309	4.40347
0.00075	4.47152	4.32586	4.51263
0.0008	4.41564	4.38506	4.38421
0.00085	4.38351	4.30792	4.37048
0.0009	4.44607	4.43304	4.36715
0.00095	4.42382	4.42416	4.33062
0.001	4.49761	4.40334	4.40853
0.00105	4.52709	4.41213	4.44256
0.0011	4.39657	4.30694	4.40334
0.00115	4.25198	4.43313	4.29473
0.0012	4.56115	4.4194	4.46374
0.00125	4.63024	4.45086	4.49386
0.0013	4.5436	4.55248	4.53378
0.00135	4.48904	4.41418	4.48257
0.0014	4.58264	4.29928	4.46072
0.00145	4.47003	4.35034	4.53362
0.0015	4.56146	4.46267	4.50115
0.00155	4.59228	4.55749	4.49829
0.0016	4.55258	4.54852	4.43313
0.00165	4.60711	4.48828	4.36315
0.0017	4.59619	4.54388	4.47134
0.00175	4.5509	4.64279	4.42257
0.0018	4.5957	4.54171	4.45178
0.00185	4.67083	4.62524	4.56646
0.0019	4.59872	4.50405	4.54849
0.00195	4.51644	4.65255	4.54354
0.002	4.6145	4.51321	4.58975
0.00205	4.53378	4.53216	4.59014
0.0021	4.54016	4.59564	4.57202
0.00215	4.49172	4.62179	4.60577
0.0022	4.50378	4.61883	4.44192
0.00225	4.64657	4.5613	4.58309
0.0023	4.68627	4.53066	4.61361
0.00235	4.69363	4.58148	4.52172
0.0024	4.58523	4.58721	4.67971
0.00245	4.67559	4.60147	4.5093
0.0025	4.71725	4.66326	4.61566
0.00255	4.68337	4.53597	4.51962
0.0026	4.65704	4.56701	4.66226
0.00265	4.77117	4.60958	4.61248
0.0027	4.65093	4.61434	4.74514
0.00275	4.74941	4.73333	4.68585
0.0028	4.7434	4.74212	4.67285
0.00285	4.73156	4.76537	4.68664
0.0029	4.7445	4.72964	4.50991
0.00295	4.6704	4.68874	4.57266
0.003	4.69799	4.54846	4.62624
0.00305	4.63714	4.73947	4.68493
0.0031	4.85681	4.63461	4.65405
0.00315	4.6983	4.58596	4.63482
0.0032	4.76287	4.74206	4.70794
0.00325	4.73233	4.65405	4.65533
0.0033	4.75881	4.68224	4.62426
0.00335	4.72305	4.68237	4.72525
0.0034	4.63125	4.63229	4.72326
0.00345	4.84555	4.75106	4.66235
0.0035	4.81744	4.78878	4.64794
0.00355	4.7138	4.94387	4.79064
0.0036	4.74966	4.75958	4.62139
0.00365	4.70086	4.64199	4.75402
0.0037	4.71948	4.78527	4.73709
0.00375	4.79409	4.89205	4.79373
0.0038	4.91824	4.61135	4.78994
0.00385	4.70068	4.70101	4.84188
0.0039	4.74401	4.68572	4.81463
0.00395	4.81124	4.81548	4.73531
0.004	4.77313	4.69158	4.8276
0.00405	4.67694	4.75997	4.77978
0.0041	4.76901	4.77136	4.79687
0.00415	4.84026	4.74032	4.86465
0.0042	4.89657	4.78857	4.81655
0.00425	4.83593	4.94662	4.81213
0.0043	4.71478	4.88973	4.63592
0.00435	4.8012	4.81347	4.80203
0.0044	4.80364	4.83663	4.83959
0.00445	4.68215	4.77227	4.75183
0.0045	4.81613	4.98068	4.81445
0.00455	4.7337	4.71255	4.80111
0.0046	4.90374	4.90173	4.8114
0.00465	4.98715	4.70928	4.70806
0.0047	5.00567	4.80282	4.77444
0.00475	4.8417	4.81237	4.77319
0.0048	4.82974	4.7687	4.82717
0.00485	4.90182	4.83419	4.94564
0.0049	4.85885	4.80993	4.70916
0.00495	4.8515	4.88079	4.88796
0.005	4.87634	4.92703	4.91006
0.00505	4.88577	4.73342	4.75707
0.0051	4.85733	4.92013	4.84307
0.00515	4.84255	5.00393	4.79901
0.0052	4.87454	4.85723	4.83636
0.00525	5.03054	4.82705	4.77654
0.0053	4.97582	4.79495	4.84786
0.00535	4.9631	4.71768	4.68856
0.0054	4.93356	4.8124	4.88519
0.00545	4.89855	4.83816	4.86373
0.0055	4.90136	4.9689	4.82556
0.00555	5.06646	4.74401	4.79434
0.0056	4.94598	4.70947	4.92159
0.00565	5.0108	4.67187	4.92144
0.0057	4.8901	4.84976	4.86834
0.00575	4.90066	4.859	4.92535
0.0058	5.09622	4.80251	4.72955
0.00585	4.98147	4.89855	4.82672
0.0059	4.93716	5.05255	4.82641
0.00595	4.94305	4.8738	4.82403
0.006	4.95611	4.90026	4.93283
0.00605	4.95663	4.85442	4.81271
0.0061	4.92175	4.85061	4.85144
0.00615	5.02017	4.88589	4.84811
0.0062	4.87081	4.91442	4.8897
0.00625	4.99932	4.84661	5.02304
0.0063	5.03607	4.89636	4.90066
0.00635	4.91055	5.01867	4.88598
0.0064	4.87795	4.90573	4.97009
0.00645	4.96679	4.92123	4.80538
0.0065	4.90878	5.04794	4.82608
0.00655	4.87106	4.87051	4.91033
0.0066	5.03439	4.90786	4.87747
0.00665	5.00558	4.84634	4.94561
0.0067	5.15304	4.82235	4.89147
0.00675	4.98913	4.98693	4.88522
0.0068	5.06854	4.92361	4.87057
0.00685	4.9707	4.80224	4.87408
0.0069	4.97942	4.82125	4.88213
0.00695	4.99896	4.86495	4.82421
0.007	4.89739	4.84612	5.0845
0.00705	5.06674	4.90692	4.90972
0.0071	4.96371	4.98269	4.89691
0.00715	5.053	4.91238	4.94085
0.0072	4.94048	4.92645	4.9851
0.00725	5.00124	5.04501	4.88119
0.0073	5.01077	4.97003	4.86004
0.00735	4.99685	4.92809	4.94216
0.0074	4.99826	4.8579	4.9783
0.00745	5.01635	5.03366	5.03634
0.0075	4.97607	4.98098	4.91967
0.00755	4.99566	4.97567	4.96838
0.0076	5.01654	5.01248	4.89459
0.00765	5.01358	4.99059	5.00192
0.0077	4.89111	4.90484	4.90914
0.00775	4.92181	5.06091	4.98834
0.0078	5.03799	4.9526	5.03295
0.00785	5.09072	4.94726	5.06274
0.0079	4.91271	4.88632	5.01006
0.00795	5.02697	4.93362	4.86721
0.008	4.96145	5.02383	4.91992
0.00805	5.01986	4.96374	4.88146
0.0081	4.99313	4.98638	5.12612
0.00815	4.85211	4.92132	4.93759
0.0082	5.06304	4.81249	4.92053
0.00825	5.10797	5.00201	5.00674
0.0083	5.03756	4.93371	5.10052
0.00835	5.0787	5.04989	4.99862
0.0084	5.10482	4.94732	4.99621
0.00845	5.05886	4.77444	5.06512
0.0085	5.05172	4.86266	4.95306
0.00855	5.10973	4.99352	5.01647
0.0086	5.09277	4.95953	5.0494
0.00865	4.95956	4.97134	5.06228
0.0087	4.92858	5.04714	5.06231
0.00875	5.00152	5.09213	4.93252
0.0088	4.90634	4.99212	4.82269
0.00885	5.04757	5.08044	5.06643
0.0089	5.04833	5.10504	4.97579
0.00895	5.17837	5.00384	4.9302
0.009	5.00527	5.0975	5.0769
0.00905	5.08502	5.09313	4.91778
0.0091	4.99972	4.97241	4.97491
0.00915	5.11096	5.01187	4.92172
0.0092	5.08612	5.09011	4.8912
0.00925	5.19467	4.91162	4.88458
0.0093	4.98303	5.09423	4.95611
0.00935	4.92745	5.19821	4.94186
0.0094	4.94958	4.9732	5.04925
0.00945	5.13912	4.95709	5.0783
0.0095	5.16293	5.06249	4.94186
0.00955	5.06362	5.02233	5.01244
0.0096	5.06204	5.0382	5.06759
0.00965	5.11389	5.13296	5.02352
0.0097	5.13082	4.94708	5.05389
0.00975	4.99166	5.03066	5.05227
0.0098	5.04653	4.93844	4.95593
0.00985	5.15341	4.92391	5.03179
0.0099	5.18463	5.02624	5.02709
0.00995	5.18707	5.01837	4.85296
0.01	5.1827	5.04214	4.89526
0.01005	5.27599	5.0574	5.06799
0.0101	5.12948	5.23031	5.08437
0.01015	5.0668	5.15869	5.05435
0.0102	5.11859	4.94772	4.95712
0.01025	5.04605	4.87808	5.13802
0.0103	4.99215	5.07791	5.09579
0.01035	5.13928	4.97848	4.9999
0.0104	5.14666	5.10406	5.0747
0.01045	5.01611	5.1152	5.01983
0.0105	5.07635	5.08642	4.87976
0.01055	5.07769	4.98245	5.07205
0.0106	5.14541	5.04955	5.04693
0.01065	5.18746	5.00408	4.9996
0.0107	5.02944	4.91174	5.07623
0.01075	5.26309	5.02282	5.0509
0.0108	5.21069	4.98901	5.01705
0.01085	5.15417	5.01919	5.04244
0.0109	5.0892	5.12673	5.14623
0.01095	5.10021	5.10031	5.03741
0.011	5.10064	5.09887	5.07937
0.01105	5.06039	5.08755	5.05401
0.0111	5.21008	5.05462	4.99603
0.01115	4.97525	5.14227	4.93124
0.0112	5.0068	5.03402	5.10894
0.01125	5.22738	4.95202	5.1051
0.0113	5.12487	5.09814	5.07519
0.01135	5.13519	5.05355	5.11514
0.0114	5.0979	4.99163	4.9269
0.01145	4.96408	5.20297	5.01159
0.0115	5.0256	5.12484	4.94305
0.01155	5.0545	5.03161	4.98748
0.0116	5.14266	5.09408	5.14517
0.01165	5.14483	5.16918	5.11312
0.0117	5.10696	5.23791	5.13571
0.01175	5.12313	5.03692	5.04717
0.0118	5.06689	4.98031	5.07925
0.01185	5.12243	5.10208	5.05187
0.0119	5.12554	4.96691	5.1213
0.01195	5.07757	5.12869	4.93865
0.012	5.00948	5.01669	5.16372
0.01205	5.21157	5.0491	5.14852
0.0121	5.12936	5.14385	5.16015
0.01215	5.2767	5.10247	5.0602
0.0122	5.10436	5.13418	5.13809
0.01225	5.08608	5.05963	4.97445
0.0123	5.1975	5.02334	4.97552
0.01235	5.07516	5.09204	5.15759
0.0124	5.03231	5.15399	4.92926
0.01245	5.09145	5.14361	5.03262
0.0125	5.14959	5.03756	5.04077
0.01255	5.13836	4.99185	4.90386
0.0126	5.06689	5.03027	4.92599
0.01265	5.01077	5.04565	5.00421
0.0127	5.01891	5.15139	5.04766
0.01275	5.06045	5.11703	5.09973
0.0128	5.14663	5.04974	4.98843
0.01285	5.14156	5.23275	4.98239
0.0129	5.1708	5.12557	5.0946
0.01295	5.27911	5.03982	4.97872
0.013	5.14572	5.11205	5.08477
0.01305	5.16381	5.15487	5.06167
0.0131	5.2058	5.12481	5.03814
0.01315	5.19372	4.96273	5.1676
0.0132	5.16583	5.11672	5.18246
0.01325	5.04653	4.99188	5.21197
0.0133	5.07699	5.17208	5.05877
0.01335	5.17037	5.11532	5.04894
0.0134	5.0393	5.08111	5.035
0.01345	5.00744	5.04284	5.08709
0.0135	5.09817	5.17358	5.1668
0.01355	5.14703	4.99804	5.15627
0.0136	5.1744	5.11398	5.11495
0.01365	5.12417	5.07778	5.03289
0.0137	5.09969	5.04589	5.16
0.01375	5.09374	5.02764	5.02447
0.0138	5.11047	4.97216	5.0389
0.01385	5.13094	5.09747	5.09417
0.0139	5.19146	5.01455	5.11737
0.01395	5.082	5.10415	5.13339
0.014	5.21444	5.02786	5.22018
0.01405	5.09957	5.08752	5.04901
0.0141	5.18594	5.19991	5.05917
0.01415	5.14092	5.01821	4.92993
0.0142	5.08355	5.14318	5.07534
0.01425	5.10122	4.96804	5.23797
0.0143	5.2116	5.1542	5.01992
0.01435	5.19665	5.04467	5.06143
0.0144	5.204	5.05828	5.07113
0.01445	5.24279	5.17987	5.09436
0.0145	5.21221	5.08401	5.07601
0.01455	5.14111	5.10507	5.04885
0.0146	5.23766	5.09362	5.07073
0.01465	5.12725	5.14797	5.13375
0.0147	5.07632	5.13091	5.14343
0.01475	5.29284	5.00762	5.18954
0.0148	5.24914	5.08584	5.17004
0.01485	5.17471	5.08801	5.13723
0.0149	5.1762	5.09533	5.19613
0.01495	5.22067	5.14514	5.14135
0.015	5.22588	5.19061	5.06658
0.01505	5.12359	5.06066	5.11886
0.0151	5.23257	5.08941	5.05816
0.01515	5.3724	5.09246	5.13046
0.0152	5.20773	5.09594	5.01745
0.01525	5.20947	5.08139	5.17184
0.0153	5.32433	5.17007	5.05529
0.01535	5.06311	5.05096	5.0859
0.0154	5.05322	4.96804	5.22634
0.01545	5.25445	5.13357	5.11508
0.0155	5.16125	5.09417	5.11688
0.01555	5.16268	5.10528	5.11932
0.0156	5.19555	5.00628	5.07522
0.01565	5.17062	5.09918	5.28247
0.0157	5.10201	5.24465	5.00271
0.01575	5.21038	5.04241	4.9569
0.0158	5.21087	5.01968	5.09213
0.01585	5.27111	5.03506	5.08444
0.0159	5.07876	5.04879	5.09426
0.01595	5.12609	5.10354	5.13168
0.016	5.20172	5.03475	5.05194
0.01605	5.14471	4.99981	5.01434
0.0161	5.1639	5.23916	5.121
0.01615	5.14514	5.2246	5.01513
0.0162	5.29476	5.15783	5.03665
0.01625	5.14095	5.0682	5.17324
0.0163	5.3132	5.16137	5.05303
0.01635	5.38403	5.22277	5.03109
0.0164	5.1415	5.08068	5.20721
0.01645	5.1972	5.24838	5.18511
0.0165	5.08712	5.09744	5.07745
0.01655	5.03393	5.04965	5.21545
0.0166	5.23794	5.10446	5.11737
0.01665	5.18243	5.23803	5.12417
0.0167	5.10855	5.12429	5.00472
0.01675	5.10595	5.0484	5.20291
0.0168	5.164	5.00616	5.11062
0.01685	5.14935	5.1509	5.13891
0.0169	5.20873	5.14865	4.99465
0.01695	5.18237	5.23989	5.11111
0.017	5.2441	5.16293	5.1806
0.01705	5.33068	5.14923	5.14718
0.0171	5.09976	5.14468	5.06869
0.01715	5.07974	4.9963	5.10809
0.0172	5.12319	5.3164	5.1058
0.01725	5.33798	5.07208	5.22512
0.0173	5.17993	5.22555	5.18344
0.01735	5.21819	5.06603	5.14291
0.0174	5.225	5.08392	5.13751
0.01745	5.1394	5.13677	5.09094
0.0175	5.17889	5.08419	5.0783
0.01755	5.17254	5.08364	5.11575
0.0176	5.19653	5.20736	5.00213
0.01765	5.28515	5.09222	5.25341
0.0177	5.20748	5.12451	4.98348
0.01775	5.3312	5.06268	5.1506
0.0178	5.33251	5.21389	5.11413
0.01785	5.18701	5.15899	5.14092
0.0179	5.26415	5.0567	5.12295
0.01795	5.28039	5.20513	5.15872
0.018	5.23629	5.03152	5.22894
0.01805	5.17233	4.98587	5.18731
0.0181	5.16085	5.0487	5.21859
0.01815	5.22463	5.06677	5.10003
0.0182	5.18798	5.23437	5.10668
0.01825	5.31851	5.09143	5.16818
0.0183	5.29247	5.27264	5.15646
0.01835	5.18139	5.23764	5.05697
0.0184	5.06613	5.11398	4.94491
0.01845	5.07464	5.08871	5.2319
0.0185	5.10754	5.14276	5.15805
0.01855	5.23177	5.23269	5.27957
0.0186	5.25927	5.06808	5.11233
0.01865	5.22412	5.1072	5.12252
0.0187	5.2579	5.11135	5.19717
0.01875	5.07611	5.1719	5.08853
0.0188	5.15881	5.08651	5.07516
0.01885	5.17895	5.06884	5.1665
0.0189	5.19488	5.05883	5.17034
0.01895	5.02362	5.0458	5.00936
0.019	5.25204	5.09265	5.10186
0.01905	5.25158	5.13967	5.13549
0.0191	5.17431	5.10235	5.21545
0.01915	5.10729	5.0599	5.27325
0.0192	5.14956	5.10943	5.10458
0.01925	5.15191	5.09417	5.13314
0.0193	5.29129	5.20306	4.96084
0.01935	5.35278	4.92489	5.1466
0.0194	5.18832	5.05312	5.07611
0.01945	5.26885	5.12805	5.1603
0.0195	5.22399	5.12808	5.23492
0.01955	5.20294	5.16839	5.11154
0.0196	5.17877	5.12246	4.98742
0.01965	5.21145	5.21438	5.16329
0.0197	5.1213	5.14901	5.12893
0.01975	5.1748	5.04711	5.13616
0.0198	5.20208	5.12332	5.26815
0.01985	5.25271	4.98541	5.08813
0.0199	5.12072	5.22082	5.17269
0.01995	5.33654	5.10797	5.10217
0.02	5.18899	5.19421	5.07525
0.02005	5.06185	4.96105	5.13171
0.0201	5.19335	5.15698	5.16073
0.02015	5.12069	5.03353	5.19341
0.0202	5.22527	5.13342	5.08853
0.02025	5.1701	5.07195	5.10299
0.0203	5.139	5.00051	5.14749
0.02035	5.13491	5.08831	5.10427
0.0204	5.28543	5.16885	5.15341
0.02045	5.2228	4.97448	5.104
0.0205	5.24044	5.20474	5.1704
0.02055	5.13107	5.10113	5.17373
0.0206	5.18215	5.1025	5.13314
0.02065	5.15301	5.09179	5.11972
0.0207	5.15978	5.14007	5.15344
0.02075	5.15524	5.06173	5.07494
0.0208	5.19589	5.13738	5.09503
0.02085	5.30145	5.03817	5.18994
0.0209	5.14355	5.13339	5.06497
0.02095	5.18774	5.03298	5.07498
0.021	5.16284	5.20117	5.16644
0.02105	5.28762	5.08642	5.24368
0.0211	5.14233	5.03536	5.24752
0.02115	5.10546	5.09936	5.04501
0.0212	5.21523	5.02267	5.12188
0.02125	5.10946	5.02172	5.03823
0.0213	5.1791	5.06109	5.1191
0.02135	5.16573	5.11993	5.20144
0.0214	5.1329	5.15627	5.26483
0.02145	5.36556	5.19906	5.17642
0.0215	5.20745	5.00314	5.11392
0.02155	5.26452	5.11828	5.19131
0.0216	5.36196	5.11312	5.06158
0.02165	5.39382	5.03411	5.10516
0.0217	5.05181	5.16091	5.21701
0.02175	5.2456	5.12225	5.1144
0.0218	5.3171	5.0541	5.27642
0.02185	5.16152	5.14349	5.2908
0.0219	5.19531	5.09884	5.08477
0.02195	5.10882	5.0472	4.95242
0.022	5.2969	5.12609	5.07345
0.02205	5.22183	5.13955	5.2178
0.0221	5.22042	5.09722	5.16821
0.02215	5.24288	5.09588	5.20568
0.0222	5.16342	5.07626	5.21526
0.02225	5.16763	5.07888	4.98715
0.0223	5.20565	5.19308	5.11096
0.02235	5.14608	5.10455	5.14385
0.0224	5.16223	5.1567	5.04983
0.02245	5.14901	5.06396	5.09567
0.0225	5.18389	5.10531	5.19226
0.02255	5.1415	5.02456	5.20742
0.0226	5.26925	5.1444	5.15258
0.02265	5.17974	5.19061	5.15008
0.0227	5.23785	5.11386	5.19692
0.02275	5.34564	5.21945	5.10372
0.0228	5.31158	5.18728	5.16879
0.02285	5.24902	5.15332	5.18109
0.0229	5.27575	5.22711	5.18102
0.02295	5.18884	5.03744	5.11019
0.023	5.12484	5.20318	5.17251
0.02305	5.08608	5.08059	5.18298
0.0231	5.25503	5.15569	5.11135
0.02315	5.15457	5.10797	5.07669
0.0232	5.23544	5.13339	5.16275
0.02325	5.1199	5.10977	5.05224
0.0233	5.22738	5.10323	5.13922
0.02335	5.23715	5.18969	5.07742
0.0234	5.28225	5.07476	5.13485
0.02345	5.22097	5.14785	5.16018
0.0235	5.23648	5.12704	5.082
0.02355	5.27572	5.14657	5.08251
0.0236	5.21582	5.09286	5.16784
0.02365	5.19555	5.07458	5.04119
0.0237	5.38622	5.17932	5.12863
0.02375	5.38351	5.23831	5.08169
0.0238	5.21038	5.18957	5.27114
0.02385	5.29028	5.22451	4.98516
0.0239	5.26873	5.0708	5.24008
0.02395	5.20526	5.13491	5.23837
0.024	5.09347	5.13235	5.02706
0.02405	5.2561	5.08615	5.06356
0.0241	5.1715	5.12063	5.21005
0.02415	5.21533	5.20535	5.1665
0.0242	5.31542	5.04891	5.16528
0.02425	5.25241	5.12618	5.15637
0.0243	5.24166	5.06478	5.17788
0.02435	5.19937	5.1415	5.23373
0.0244	5.16085	5.07659	5.04812
0.02445	5.07952	5.08093	5.1043
0.0245	5.22424	5.25338	5.13571
0.02455	5.14999	5.15158	5.0895
0.0246	5.26821	5.12203	5.03457
0.02465	5.16094	5.11901	5.12911
0.0247	5.13241	4.98818	5.14987
0.02475	5.21838	5.11193	5.05957
0.0248	5.24505	5.01144	5.18423
0.02485	5.18438	5.09002	5.18188
0.0249	5.22021	5.16812	5.22296
0.02495	5.20007	5.16223	5.03445
0.025	5.26907	5.15521	5.10366
0.02505	5.28573	5.07879	5.15338
0.0251	5.1517	5.12176	5.08016
0.02515	5.28906	5.2048	5.24246
0.0252	5.07061	5.177	5.17016
0.02525	5.06976	5.28427	5.20648
0.0253	5.19183	5.23272	5.1665
0.02535	5.28695	5.15203	5.1864
0.0254	5.12512	5.1123	5.18518
0.02545	5.11676	5.01995	5.09258
0.0255	5.32711	5.19921	5.06191
0.02555	5.27441	5.13143	5.24597
0.0256	5.29461	5.02816	5.15994
0.02565	5.26089	5.09533	5.22271
0.0257	5.26602	5.14254	5.1235
0.02575	5.31509	5.07348	5.17611
0.0258	5.32681	5.27911	5.13528
0.02585	5.20358	5.0653	5.06844
0.0259	5.3337	5.13326	5.19174
0.02595	5.27407	5.18118	5.1217
0.026	5.2557	5.15521	5.14935
0.02605	5.28152	5.23202	5.14541
0.0261	5.28735	5.03518	5.02627
0.02615	5.09481	4.95318	5.18139
0.0262	5.25683	5.13207	5.15716
0.02625	5.24658	5.13052	5.13143
0.0263	5.16076	5.15649	5.25222
0.02635	5.31686	5.16665	5.27932
0.0264	5.17556	5.13818	5.16277
0.02645	5.28842	5.30288	5.14013
0.0265	5.19668	5.11825	5.09927
0.02655	5.34103	5.20773	5.17791
0.0266	5.13851	5.05123	5.07635
0.02665	5.11453	5.20251	5.30224
0.0267	5.1759	5.17602	5.34951
0.02675	5.22314	5.11074	5.24179
0.0268	5.2265	5.13723	5.12326
0.02685	5.12194	5.08682	5.11022
0.0269	5.1975	5.15588	5.14538
0.02695	5.17663	5.07342	5.07086
0.027	5.22039	4.9869	5.1264
0.02705	5.21008	5.18853	5.21737
0.0271	5.19827	5.10702	5.18224
0.02715	5.11575	5.11584	5.121
0.0272	5.31158	5.0921	5.19079
0.02725	5.15805	5.1799	5.15054
0.0273	5.27337	5.02352	5.02798
0.02735	5.34951	5.1445	5.18936
0.0274	5.38958	5.08828	5.20529
0.02745	5.21511	5.20089	5.13082
0.0275	5.17016	5.16656	5.15008
0.02755	5.15978	5.20523	5.17065
0.0276	5.28936	5.16394	5.20806
0.02765	5.21057	5.03362	5.08053
0.0277	5.18392	5.05493	4.98709
0.02775	5.38854	5.18472	5.17495
0.0278	5.27593	5.1722	5.18685
0.02785	5.21563	5.15502	5.0534
0.0279	5.25002	5.06112	5.20043
0.02795	5.24768	5.16125	5.13964
0.028	5.25991	5.12933	5.09451
0.02805	5.32183	5.1376	5.08236
0.0281	5.19885	5.03179	5.28222
0.02815	5.27847	5.0902	5.06149
0.0282	5.20404	5.13107	5.11596
0.02825	5.22942	5.08264	5.13265
0.0283	5.22351	5.18429	5.10076
0.02835	5.3833	5.20873	5.17803
0.0284	5.1769	5.23199	5.09316
0.02845	5.20666	5.048	5.04812
0.0285	5.24459	5.14569	5.16592
0.02855	5.25732	5.18569	5.23956
0.0286	5.15078	5.17343	5.18322
0.02865	5.03475	5.11117	5.12536
0.0287	5.31854	5.13567	5.21859
0.02875	5.2424	5.27636	5.02761
0.0288	5.21414	5.18401	5.10839
0.02885	5.31753	5.13943	5.16195
0.0289	5.22363	5.0744	5.20803
0.02895	5.26943	5.19122	5.1177
0.029	5.29141	5.19143	5.17919
0.02905	5.16625	5.17755	5.10104
0.0291	5.13229	5.10162	5.13949
0.02915	5.12374	5.11474	5.17776
0.0292	5.32726	5.16802	5.15948
0.02925	5.38336	5.08831	5.0285
0.0293	5.20248	5.07498	5.13476
0.02935	5.05053	5.22955	5.19137
0.0294	5.32803	5.05779	5.11721
0.02945	5.23562	5.19659	5.12481
0.0295	5.18649	5.22479	5.17684
0.02955	5.19326	5.2174	5.19924
0.0296	5.12609	5.17056	5.13656
0.02965	5.22152	5.16296	5.23583
0.0297	5.33853	5.09506	5.24514
0.02975	5.24551	4.95397	5.08724
0.0298	5.22848	5.15997	5.14599
0.02985	5.29513	5.2221	5.2265
0.0299	5.24816	5.06494	5.17248
0.02995	5.19204	5.13931	5.07592
0.03	5.20291	5.1007	5.16903
0.03005	5.12509	5.23641	5.10891
0.0301	5.34329	5.28262	5.23648
0.03015	5.268	5.2528	5.13433
0.0302	5.42147	5.15066	5.15866
0.03025	5.30551	5.09451	5.21133
0.0303	5.139	5.17245	5.10259
0.03035	5.31902	5.04308	5.11972
0.0304	5.36395	5.13989	5.07043
0.03045	5.17034	5.2218	5.04125
0.0305	5.25085	5.13888	5.12744
0.03055	5.18084	5.09762	5.25079
0.0306	5.32684	5.08343	5.20052
0.03065	5.36929	4.97796	5.12719
0.0307	5.3251	5.08175	5.1697
0.03075	5.20083	5.15249	5.28066
0.0308	5.27807	5.09698	5.09008
0.03085	5.2738	5.14935	5.19509
0.0309	5.16363	5.08682	5.12222
0.03095	5.21813	5.04351	5.13174
0.031	5.31133	5.17037	5.15713
0.03105	5.13479	5.14877	5.13207
0.0311	5.13012	5.07763	5.15551
0.03115	5.3117	5.16775	5.23684
0.0312	5.26126	5.15765	5.13653
0.03125	5.2123	5.01333	5.12283
0.0313	5.20013	5.15579	5.05526
0.03135	5.25213	5.18478	5.0679
0.0314	5.2477	5.15484	5.12521
0.03145	5.25237	5.19134	5.08392
0.0315	5.21743	5.13919	5.30609
0.03155	5.22064	5.0364	5.22756
0.0316	5.16986	5.0924	5.29959
0.03165	5.18139	5.1896	5.27304
0.0317	5.24798	5.25396	5.12911
0.03175	5.34786	5.14569	5.00317
0.0318	5.20584	5.05883	5.12493
0.03185	5.16378	5.10949	5.12222
0.0319	5.21502	5.09216	5.30957
0.03195	5.22732	5.16424	5.113
0.032	5.17782	5.19497	5.17364
0.03205	5.35708	5.22662	5.01647
0.0321	5.28887	5.16891	5.0895
0.03215	5.26379	5.04583	5.2431
0.0322	5.29025	5.21472	5.0472
0.03225	5.29504	5.1094	5.15197
0.0323	5.23825	5.27383	5.22048
0.03235	5.18862	5.12332	5.18801
0.0324	5.10626	5.18286	5.11718
0.03245	5.28884	5.08023	5.17452
0.0325	5.18859	5.10308	5.31591
0.03255	5.2492	5.07076	5.15576
0.0326	5.20916	5.18411	5.16616
0.03265	5.36816	5.07278	5.28982
0.0327	5.1932	5.19647	5.24926
0.03275	5.20953	5.11904	5.14395
0.0328	5.15304	5.18411	5.22116
0.03285	5.3056	5.06732	5.19372
0.0329	5.16073	4.92895	5.15304
0.03295	5.22506	5.08251	5.14291
0.033	5.26287	5.08392	5.20095
0.03305	5.24798	5.25262	5.14327
0.0331	5.35794	5.1004	5.14541
0.03315	5.27346	5.11501	5.05972
0.0332	5.26266	5.27148	5.05071
0.03325	5.26562	5.25823	5.25769
0.0333	5.29312	5.28552	5.02419
0.03335	5.24191	5.31607	5.08813
0.0334	5.3373	5.1686	5.26254
0.03345	5.20178	5.1824	5.18389
0.0335	5.12756	5.173	5.11138
0.03355	5.21173	5.22048	5.16421
0.0336	5.34295	5.15731	5.1874
0.03365	5.24539	5.10323	5.10238
0.0337	5.32153	5.24032	5.18725
0.03375	5.18679	5.26669	5.08358
0.0338	5.21533	5.12637	5.2955
0.03385	5.28958	5.06738	5.17056
0.0339	5.11047	5.13702	5.17544
0.03395	5.35116	5.11288	5.14865
0.034	5.16345	5.03109	5.20873
0.03405	5.20712	5.13726	5.19033
0.0341	5.21511	5.11205	5.21731
0.03415	5.11767	5.15215	5.23663
0.0342	5.2972	5.17047	5.2004
0.03425	5.31072	5.19381	5.18325
0.0343	5.32635	5.15826	5.13128
0.03435	5.12502	5.12594	5.12859
0.0344	5.20928	5.16567	5.04885
0.03445	5.3034	5.33685	5.19994
0.0345	5.25027	5.07681	5.2102
0.03455	5.27957	5.06469	5.19888
0.0346	5.12927	5.09826	5.06222
0.03465	5.26803	5.17504	5.0165
0.0347	5.24954	5.22985	5.20333
0.03475	5.19619	5.12554	5.10708
0.0348	5.28915	5.18948	5.10128
0.03485	5.21136	5.18212	5.22073
0.0349	5.18755	5.18438	5.0935
0.03495	5.14614	5.1993	5.19024
0.035	5.23928	5.20852	5.14892
0.03505	5.23101	5.06207	5.18038
0.0351	5.20001	5.11535	5.15127
0.03515	5.1506	5.2229	5.13213
0.0352	5.26019	5.09969	5.02429
0.03525	5.28808	5.18228	5.26071
0.0353	5.27599	5.28887	5.09231
0.03535	5.3247	5.09597	5.12951
0.0354	5.23522	5.11889	5.07641
0.03545	5.1853	5.26861	5.10659
0.0355	5.23202	5.07494	5.01895
0.03555	5.18099	5.2077	5.22622
0.0356	5.26507	5.1397	5.26867
0.03565	5.24606	5.10095	5.19692
0.0357	5.18685	5.21606	5.29586
0.03575	5.21197	5.19262	5.25619
0.0358	5.20443	5.25308	5.13644
0.03585	5.09316	5.1206	5.17999
0.0359	5.3796	5.23071	5.28478
0.03595	5.21938	5.19854	5.2055
0.036	5.10201	5.12246	5.14102
0.03605	5.3815	5.23983	5.16113
0.0361	5.2539	5.12472	5.27932
0.03615	5.15307	5.24502	5.04824
0.0362	5.11282	5.09283	5.24987
0.03625	5.32415	4.97863	5.1477
0.0363	5.06982	5.08129	5.11718
0.03635	5.2048	5.14645	5.26004
0.0364	5.13238	5.12734	5.08908
0.03645	5.17398	5.14431	5.22024
0.0365	5.24124	5.11627	5.27276
0.03655	5.11916	5.13122	5.25674
0.0366	5.26937	5.22369	5.17532
0.03665	5.16238	5.1647	5.16198
0.0367	5.21121	5.22732	5.23126
0.03675	5.15045	5.13	5.18273
0.0368	5.12274	5.15286	5.199
0.03685	5.11199	5.13085	5.2188
0.0369	5.27999	5.24447	5.11972
0.03695	5.26251	5.1647	5.09515
0.037	5.23904	5.17147	5.11471
0.03705	5.18444	5.14932	5.10455
0.0371	5.19561	5.23242	5.15127
0.03715	5.24694	5.31912	5.17712
0.0372	5.30187	5.17233	4.99389
0.03725	5.18661	5.28494	5.1918
0.0373	5.31545	5.13937	5.17138
0.03735	5.13937	4.9934	5.07403
0.0374	5.14868	5.20947	5.13561
0.03745	5.28915	5.33584	5.26632
0.0375	5.09075	5.18795	5.27383
0.03755	5.2915	5.09606	5.10043
0.0376	5.23849	5.08554	5.23831
0.03765	5.3236	5.134	5.11352
0.0377	5.24429	5.20712	5.11239
0.03775	5.19485	5.18105	5.11999
0.0378	5.20226	5.18035	5.09304
0.03785	5.2427	5.15927	5.12533
0.0379	5.2196	5.17773	5.16595
0.03795	5.19903	5.16967	5.18231
0.038	5.13622	5.09066	5.14913
0.03805	5.18542	5.07736	5.10296
0.0381	5.29812	5.09011	5.18847
0.03815	5.35165	5.08914	5.16775
0.0382	5.29192	5.15692	5.11737
0.03825	5.1817	5.16284	5.12139
0.0383	5.199	5.22347	5.28231
0.03835	5.16891	5.13094	5.12029
0.0384	5.2058	5.05819	5.23828
0.03845	5.28155	5.22366	5.22106
0.0385	5.25463	5.29357	5.2756
0.03855	5.21118	5.13766	5.09521
0.0386	5.1723	5.05386	5.19677
0.03865	5.16012	5.20059	5.22592
0.0387	5.12615	5.14977	5.17663
0.03875	5.38751	5.19631	5.238
0.0388	5.29928	5.16567	5.29095
0.03885	5.1947	5.03335	5.22466
0.0389	5.31072	5.15686	5.10192
0.03895	5.31146	5.37246	5.22338
0.039	5.25021	5.20385	5.22866
0.03905	5.11904	5.15267	5.1029
0.0391	5.23226	5.11184	5.29531
0.03915	5.26837	5.26464	5.10629
0.0392	5.19906	5.09048	5.0621
0.03925	5.26202	5.26425	5.15472
0.0393	5.24124	5.07653	5.20086
0.03935	5.23797	4.99969	5.06954
0.0394	5.27969	5.08386	5.15014
0.03945	5.2864	5.29565	5.10519
0.0395	5.29312	5.09271	5.2405
0.03955	5.20462	5.15328	5.17138
0.0396	5.17675	5.02136	5.06045
0.03965	5.24462	5.08416	5.10888
0.0397	5.27426	5.23828	5.22384
0.03975	5.10894	5.19262	4.97973
0.0398	5.21865	5.2629	5.16448
0.03985	5.20651	5.15524	5.11166
0.0399	5.16403	5.11831	5.18066
0.03995	5.28216	5.18957	5.12524
0.04	5.11031	5.18716	5.22933
0.04005	5.2012	5.1592	5.22973
0.0401	5.29418	5.15215	5.11498
0.04015	5.2239	5.06625	5.16259
0.0402	5.22268	4.99285	5.16146
0.04025	5.21383	5.26675	5.2763
0.0403	5.19296	5.04156	5.09185
0.04035	5.25091	5.03637	5.22433
0.0404	5.25402	5.07787	5.10998
0.04045	5.23605	5.16104	5.24124
0.0405	5.21353	5.11877	5.09686
0.04055	5.29473	5.11999	5.21539
0.0406	5.26406	5.15933	5.10156
0.04065	5.21069	5.14166	5.26647
0.0407	5.26089	5.2232	5.15856
0.04075	5.21462	4.97732	5.13448
0.0408	5.08901	5.15405	5.15838
0.04085	5.22009	5.05642	5.04711
0.0409	5.21401	5.21969	5.11666
0.04095	5.24447	5.22674	5.28012
0.041	5.20495	5.22644	5.15521
0.04105	5.2604	5.1538	5.23556
0.0411	5.26132	5.29031	5.1199
0.04115	5.33383	5.14544	5.1043
0.0412	5.39788	5.2214	5.12533
0.04125	5.2257	5.14626	5.09387
0.0413	5.22222	5.26611	5.16491
0.04135	5.21002	5.22762	5.18948
0.0414	5.28561	5.13565	5.21484
0.04145	5.31863	5.15917	5.22482
0.0415	5.24584	5.05322	5.20208
0.04155	5.17987	5.07491	5.20516
0.0416	5.16229	5.34274	5.1564
0.04165	5.32656	5.08215	5.15521
0.0417	5.25259	5.2824	5.17822
0.04175	5.29226	5.18844	5.26019
0.0418	5.24267	5.24395	5.24237
0.04185	5.20236	5.15441	5.1527
0.0419	5.31158	5.11685	5.22192
0.04195	5.25994	5.013	5.07522
0.042	5.28646	5.14166	5.10687
0.04205	5.14367	5.1325	5.09561
0.0421	5.2723	5.20614	5.08532
0.04215	5.25735	5.26806	5.11544
0.0422	5.2077	5.04791	5.18807
0.04225	5.09466	5.16125	5.14752
0.0423	5.29129	5.33419	5.10562
0.04235	5.38467	5.23568	5.07748
0.0424	5.26367	5.09811	5.09616
0.04245	5.29489	5.07589	5.07864
0.0425	5.15423	5.1206	5.01602
0.04255	5.20373	5.27899	5.05487
0.0426	5.33209	5.09616	5.17654
0.04265	5.26977	5.13336	5.23672
0.0427	5.10009	5.19354	5.17874
0.04275	5.2792	5.27111	5.31213
0.0428	5.16436	5.10562	5.02688
0.04285	5.23416	5.22875	5.16064
0.0429	5.31127	5.32348	5.18121
0.04295	5.19082	5.07394	5.07147
0.043	5.08602	5.13662	5.08459
0.04305	5.24761	5.15872	5.19338
0.0431	5.39517	5.19409	5.12161
0.04315	5.18224	5.20226	5.25015
0.0432	5.21591	5.07766	5.27569
0.04325	5.26983	5.20809	5.16332
0.0433	5.19787	5.17886	5.11471
0.04335	5.18298	5.22094	5.27215
0.0434	5.35827	5.18243	5.32751
0.04345	5.21899	5.30993	5.2489
0.0435	5.31368	5.21353	5.13177
0.04355	5.33175	5.09704	5.1708
0.0436	5.20043	5.11102	5.21481
0.04365	5.20657	5.22268	5.13229
0.0437	5.26733	5.14974	5.30941
0.04375	5.27136	5.09255	5.24444
0.0438	5.19424	5.14523	5.0274
0.04385	5.09646	5.23303	5.10662
0.0439	5.31326	5.13714	5.0718
0.04395	5.27444	5.18975	5.19348
0.044	5.18176	5.07208	5.29394
0.04405	5.26016	5.2973	5.15179
0.0441	5.30682	5.16949	5.13085
0.04415	5.31942	4.99075	5.108
0.0442	5.29153	5.10488	5.28524
0.04425	5.3117	5.20907	5.23629
0.0443	5.15185	5.15408	5.25369
0.04435	5.2319	5.25637	5.03305
0.0444	5.20141	5.15893	5.12396
0.04445	5.18179	5.26376	5.15093
0.0445	5.22991	5.06726	5.0704
0.04455	5.29727	5.15624	5.20785
0.0446	5.29186	5.06909	5.18029
0.04465	5.24163	5.16134	5.13586
0.0447	5.25704	5.17254	5.26461
0.04475	5.27664	5.17996	5.16125
0.0448	5.27026	5.20864	5.10421
0.04485	5.23968	5.15594	4.94241
0.0449	5.2731	5.14004	5.2416
0.04495	5.34207	5.11492	5.15835
0.045	5.30508	5.07089	5.01702
0.04505	5.26934	5.20178	5.11483
0.0451	5.16375	5.20004	5.00927
0.04515	5.3999	5.15896	5.06225
0.0452	5.18267	5.17391	5.18771
0.04525	5.21997	5.13784	5.16879
0.0453	5.3533	5.18344	5.24719
0.04535	5.17373	5.17068	5.18228
0.0454	5.25897	5.12356	5.12414
0.04545	5.20504	5.21526	5.16668
0.0455	5.29913	5.27508	5.23031
0.04555	5.16723	5.19198	5.15084
0.0456	5.23294	5.09976	5.09384
0.04565	5.21774	5.22506	5.28524
0.0457	5.16458	5.31188	5.32125
0.04575	5.3576	5.12045	5.23791
0.0458	5.24975	5.19805	5.20614
0.04585	5.15307	5.02093	5.16162
0.0459	5.23394	5.11901	5.13473
0.04595	5.16116	5.17288	5.2044
0.046	5.22598	5.33822	5.19402
0.04605	5.29888	5.05099	5.11202
0.0461	5.3572	5.17919	5.16607
0.04615	5.55441	5.23434	5.14236
0.0462	5.31497	5.15298	5.23535
0.04625	5.26214	5.17529	5.17291
0.0463	5.32379	5.23388	5.22534
0.04635	5.24352	5.05853	5.26196
0.0464	5.23559	5.13641	5.24401
0.04645	5.19698	5.29974	5.16226
0.0465	5.21627	5.03561	5.02346
0.04655	5.25488	5.11843	5.06088
0.0466	5.25726	5.13269	5.17831
0.04665	5.2123	5.19839	5.08389
0.0467	5.22173	5.24264	5.03384
0.04675	5.16989	5.18792	5.10977
0.0468	5.19665	5.23177	5.16961
0.04685	5.19109	5.10787	5.1694
0.0469	5.18441	5.10494	5.19128
0.04695	5.38	5.19189	5.08608
0.047	5.21569	5.17602	5.0758
0.04705	5.3478	5.2434	5.08349
0.0471	5.26443	5.24508	5.03875
0.04715	5.16082	5.04989	5.19815
0.0472	5.29226	5.12911	5.21526
0.04725	5.33087	5.24658	5.17269
0.0473	5.33813	5.20925	5.24444
0.04735	5.31002	5.09088	5.21572
0.0474	5.30035	5.21487	5.17156
0.04745	5.29708	5.21224	5.29186
0.0475	5.23367	5.19155	5.31249
0.04755	5.24795	5.29122	5.20498
0.0476	5.17947	5.15786	5.17651
0.04765	5.1528	5.16992	5.28469
0.0477	5.28372	5.13091	5.19766
0.04775	5.33465	5.15454	5.1564
0.0478	5.35787	5.11029	5.29427
0.04785	5.23754	5.18978	4.99255
0.0479	5.19433	5.06609	5.14944
0.04795	5.10662	5.21688	5.21066
0.048	5.30529	5.18185	5.20126
0.04805	5.15869	5.15817	5.22396
0.0481	5.07751	5.09612	5.05932
0.04815	5.19671	5.23709	5.08651
0.0482	5.32809	5.26608	5.16885
0.04825	5.36056	5.25314	5.0798
0.0483	5.17516	5.24313	5.21377
0.04835	5.30255	5.17083	4.9746
0.0484	5.15518	5.22378	5.19558
0.04845	5.3544	5.12094	5.25326
0.0485	5.36453	5.0881	5.16805
0.04855	5.36093	5.28381	5.09078
0.0486	5.14459	5.13073	5.17694
0.04865	5.26583	5.19287	5.23516
0.0487	5.21768	5.23489	5.22567
0.04875	5.28454	5.2326	5.13415
0.0488	5.14416	5.0856	5.17681
0.04885	5.30505	5.11807	5.13333
0.0489	5.19897	5.22747	5.21026
0.04895	5.32516	5.09387	5.07406
0.049	5.29235	5.17913	5.03228
0.04905	5.1582	5.15444	5.11587
0.0491	5.20602	5.16488	5.22692
0.04915	5.32904	5.07067	5.10742
0.0492	5.30322	5.12264	5.22042
0.04925	5.2427	5.18383	5.16967
0.0493	5.35266	5.20233	5.08425
0.04935	5.208	5.11395	5.16299
0.0494	5.13885	5.25518	5.12356
0.04945	5.26232	5.22656	5.1929
0.0495	5.2763	5.18664	5.15884
0.04955	5.25927	5.14154	5.12689
0.0496	5.19909	5.20129	4.99511
0.04965	5.26666	5.2749	5.21349
0.0497	5.3225	5.21404	5.06503
0.04975	5.27175	5.16348	5.13772
0.0498	5.21185	5.08865	5.1733
0.04985	5.20999	5.33978	5.19024
0.0499	5.24578	5.11456	5.09371
0.04995	5.18667	5.14504	5.13534
0.05	5.25421	5.10034	5.12701
