# Supplementary material for: Kinetic regulation of kinesin’s two motor domains coordinates its stepping along microtubules
Source: eLife. 2025 Apr 17;14:RP106228. doi: 10.7554/eLife.106228 (PMC12005725; doi:10.7554/eLife.106228)
Supplement: Figure 2—figure supplement 3—source data 1. [file elife-106228-fig2-figsupp3-data1.xls]

## Sheet: Sheet1
Single molecule fluorescent motility assay in the presence of Alexa-ATP							Fig.2-suppl 3B
50 uM	n71	mean 52.3	SD 25.2	SEM 3.0		30 uM	n 69	mean 32.7	SD 18.3	SEM 2.2		20 uM	n 77	mean 26.5	SD 16.4	SEM 1.86		10 uM	mean 11.76	SD 5.68	SEM 0.802
1	1.28	23.6	54.237			1	0.4	9.8	40.816			1	0.56	29.4	19.048			1	0.4	27.2	14.706
2	0.56	7	80			2	0.16	8.2	19.512			2	0.24	16.2	14.815			2	0.4	26.8	14.925
3	0.72	11.8	61.017			3	0.72	10	72			3	0.08	6.2	12.903			3	0.4	23.6	16.949
4	0.72	9.4	76.596			4	0.64	13.6	47.059			4	0.16	7.8	20.513			4	0.56	29.2	19.178
5	0.48	9.4	51.064			5	0.32	5	64			5	0.4	16.6	24.096			5	0.4	25	16
6	0.48	8	60			6	0.4	7.6	52.632			6	0.08	12.6	6.349			6	0.16	9.2	17.391
7	1.2	19.8	60.606			7	0.24	4.4	54.545			7	0.32	7.4	43.243			7	0.24	39	6.154
8	0.4	7.4	54.054			8	0.32	7	45.714			8	1.6	75.6	21.164			8	0.16	13	12.308
9	1.12	22	50.909			9	0.32	5	64			9	0.72	14.2	50.704			9	0.08	11.4	7.018
10	0.24	4.6	52.174			10	0.4	4.8	83.333			10	0.4	12.4	32.258			10	0.16	9.8	16.327
11	0.24	4.8	50			11	0.4	7.2	55.556			11	0.32	6.6	48.485			11	0.08	12	6.667
12	0.4	5.6	71.429			12	0.8	18.6	43.011			12	0.24	10.4	23.077			12	0.16	37	4.324
13	0.4	7.4	54.054			13	0.88	12	73.333			13	0.64	21	30.476			13	0.4	26.6	15.038
14	0.4	7.8	51.282			14	0.56	11.4	49.123			14	0.4	14.6	27.397			14	0.16	9.8	16.327
15	0.24	6.2	38.71			15	1.12	33.2	33.735			15	0.16	5.2	30.769			15	0.08	6.2	12.903
16	0.4	10.4	38.462			16	0.4	12.2	32.787			16	0.32	16.4	19.512			16	0.16	8.2	19.512
17	0.16	6.8	23.529			17	0.24	6.4	37.5			17	0.32	9.4	34.043			17	0.08	14	5.714
18	0.16	4.8	33.333			18	0.48	18.2	26.374			18	0.48	20.2	23.762			18	0.08	5.6	14.286
19	0.72	7.2	100			19	0.08	9.4	8.511			19	0.48	36	13.333			19	0.24	34	7.059
20	0.32	3.2	100			20	0.16	10.8	14.815			20	0.8	25.4	31.496			20	0.56	25.4	22.047
21	0	3	0			21	0.08	4.2	19.048			21	0.16	6	26.667			21	0.24	45.6	5.263
22	0.4	13.6	29.412			22	0.08	5.4	14.815			22	0.24	9.4	25.532			22	0.08	7.6	10.526
23	0.8	11.2	71.429			23	0.56	14.8	37.838			23	0.24	9.2	26.087			23	0.32	87	3.678
24	0.24	3.2	75			24	0.72	23.2	31.034			24	0.08	6.2	12.903			24	0.56	97.6	5.738
25	0.24	4.2	57.143			25	0.64	19.8	32.323			25	0.32	17	18.824			25	0.08	13.8	5.797
26	0.4	4.2	95.238			26	0.32	10	32			26	0.16	8.4	19.048			26	0.08	23	3.478
27	0.4	5	80			27	0.08	4.8	16.667			27	0	7.8	0			27	0.32	34.2	9.357
28	0.72	18.6	38.71			28	0.56	33.8	16.568			28	0.08	7	11.429			28	0.16	42.2	3.791
29	0.64	14.6	43.836			29	0.24	19.2	12.5			29	0.48	16.6	28.916			29	0.32	14.4	22.222
30	0.8	25.4	31.496			30	0.48	9	53.333			30	0.4	13.2	30.303			30	0.08	4	20
31	0.32	4.6	69.565			31	0.56	13.2	42.424			31	0.88	90.4	9.735			31	0.16	12.4	12.903
32	0.24	12.4	19.355			32	0.8	15.6	51.282			32	0.56	21.6	25.926			32	0.24	28	8.571
33	0.16	3.8	42.105			33	0.4	25	16			33	0.48	13.2	36.364			33	0.16	18	8.889
34	0.4	5.8	68.966			34	1.68	39.4	42.64			34	0.24	11.4	21.053			34	0.16	18.4	8.696
35	0.32	5.2	61.538			35	0.96	27.4	35.036			35	0.32	23.6	13.559			35	0.08	23	3.478
36	0.4	10.4	38.462			36	0.4	6.6	60.606			36	0.24	10.8	22.222			36	0.08	9.4	8.511
37	0.56	8.8	63.636			37	0.56	17.8	31.461			37	0.56	23.6	23.729			37	0.32	18.8	17.021
38	0.64	10	64			38	0.08	6.2	12.903			38	0.4	12.2	32.787			38	0.16	26.6	6.015
39	0.8	17.2	46.512			39	0.64	18	35.556			39	0.16	9.8	16.327			39	0.16	16.8	9.524
40	0.72	11.2	64.286			40	0.32	19.6	16.327			40	0.24	12	20			40	0.48	42.6	11.268
41	0.64	16	40			41	0.72	21.2	33.962			41	0.4	5.8	68.966			41	0.16	12.8	12.5
42	0.88	19.8	44.444			42	0.4	69.6	5.747			42	0.16	2.6	61.538			42	0.08	13.6	5.882
43	0.56	10.2	54.902			43	0.16	5.6	28.571			43	0.4	3.8	105.263			43	0.16	9.8	16.327
44	0.56	12.8	43.75			44	0.08	5.4	14.815			44	1.2	50	24			44	0.4	21.8	18.349
45	0.16	5	32			45	0.16	6.6	24.242			45	0.48	6.4	75			45	0.4	36.4	10.989
46	0.32	6.8	47.059			46	0.64	11.4	56.14			46	0.88	24.8	35.484			46	0.08	22	3.636
47	0.32	5.8	55.172			47	0.24	4.6	52.174			47	0.48	13.8	34.783			47	0.24	11.2	21.429
48	0.32	3.6	88.889			48	0.16	9	17.778			48	0.32	12.2	26.23			48	0.48	28.6	16.783
49	1.36	9	151.111			49	0.48	15.8	30.38			49	0.24	6	40			49	0.24	12.8	18.75
50	0.48	14.4	33.333			50	1.2	29.4	40.816			50	0.4	9.4	42.553			50	0.4	28.8	13.889
51	0.64	16.8	38.095			51	0.56	18.4	30.435			51	0.4	16.8	23.81
52	0.72	17.8	40.449			52	1.12	33.2	33.735			52	0.4	11.8	33.898
53	0.56	7.6	73.684			53	0.48	35	13.714			53	0.56	16	35
54	0.32	3	106.667			54	0.24	27.2	8.824			54	0.32	10.2	31.373
55	0.32	4	80			55	0.08	41.6	1.923			55	0.72	30	24
56	0.24	9.6	25			56	0	4	0			56	0.8	35.2	22.727
57	0.08	4.4	18.182			57	0.72	24.6	29.268			57	0.24	14	17.143
58	0.08	10.2	7.843			58	0.16	8.2	19.512			58	0.24	10.2	23.529
59	0.48	11.4	42.105			59	0.56	14.8	37.838			59	0.08	7.4	10.811
60	0.4	7.8	51.282			60	0.56	15.8	35.443			60	0.08	9.2	8.696
61	0.4	8.8	45.455			61	0.32	20	16			61	0.16	5.4	29.63
62	0.32	8	40			62	0.08	6.6	12.121			62	0	5.6	0
63	0.16	4.2	38.095			63	0.4	12.8	31.25			63	0.64	31	20.645
64	0.64	18.4	34.783			64	0.48	13.8	34.783			64	0.56	27.6	20.29
65	0.08	4.2	19.048			65	0	5	0			65	0.96	39.6	24.242
66	0.64	19.6	32.653			66	0.4	10.2	39.216			66	0	5.6	0
67	0.24	5.8	41.379			67	0.16	8.6	18.605			67	0.56	19	29.474
68	0.08	3.4	23.529			68	0.32	9.6	33.333			68	0.64	18.4	34.783
69	0.4	14.8	27.027			69	0.08	3.4	23.529			69	1.12	35	32
70	0.48	11.6	41.379									70	0.64	22.6	28.319
71	0.32	3.4	94.118									71	0.48	37	12.973
												72	0.56	25	22.4
												73	0.64	22.2	28.829
												74	0.24	31.6	7.595
												75	0.16	16	10
												76	0.08	6.8	11.765
												77	0.4	12.2	32.787
