# Supplementary material for: Kinetic regulation of kinesin’s two motor domains coordinates its stepping along microtubules
Source: eLife. 2025 Apr 17;14:RP106228. doi: 10.7554/eLife.106228 (PMC12005725; doi:10.7554/eLife.106228)
Supplement: Figure 2—figure supplement 4—source data 1. [file elife-106228-fig2-figsupp4-data1.xlsx]

## Sheet: Sheet1
Alexa-ATP binding		Dwell time in the high FRET state
Fig.4-suppl 3		Fig.6-suppl 5		Fig.6-suppl 5		Fig.2-suppl 4B
E236A/WT						K349 monomer
G0 hist	G0 hist x	G7 hist	G7 hist x	G12 hist	G12 hist x	monomer hist	monomer hist x
23	0	36	0	108	0	72	0
6	5	13	5	37	5	43	0.5
10	10	12	10	22	10	53	1
5	15	8	15	15	15	16	1.5
3	20	6	20	9	20	22	2
4	25	7	25	3	25	7	2.5
4	30	3	30	7	30	15	3
4	35	7	35	6	35	2	3.5
3	40	9	40	5	40	9	4
3	45	5	45	2	45	2	4.5
3	50	4	50	1	50	3	5
1	55	1	55	5	55	2	5.5
2	60	5	60	2	60	6	6
3	65	3	65	2	65	5	6.5
4	70	2	70	5	70	3	7
2	75	3	75	1	75	2	7.5
1	80	4	80	1	80	2	8
1	85	6	85	1	85	2	8.5
2	90	0	90	1	90	1	9
0	95	1	95	2	95	5	9.5
0	100	2	100	1	100	0	10
1	105	4	105	0	105	1	10.5
2	110	0	110	0	110	2	11
1	115	1	115	1	115	1	11.5
0	120	1	120	1	120	3	12
3	125	1	125	1	125	0	12.5
1	130	3	130	3	130	2	13
3	135	1	135	1	135	1	13.5
0	140	3	140	2	140	1	14
2	145	1	145	0	145	0	14.5
1	150	2	150	0	150	0	15
0	155	2	155	0	155	2	15.5
0	160	0	160	1	160	1	16
1	165	1	165	0	165	0	16.5
1	170	1	170	0	170	0	17
1	175	2	175	0	175	1	17.5
0	180	2	180	0	180	1	18
2	185	0	185	0	185	0	18.5
2	190	1	190	1	190	1	19
6	195	4	195	1	195	1	19.5
30	200	7	200	7	200	0	20
0	205	0	205	0	205	1	20.5
						1	21
						0	21.5
						0	22
						0	22.5
						0	23
						0	23.5
						1	24
						3	24.5
						1	25
						2	25.5
						0	26
						0	26.5
						1	27
						0	27.5
						0	28
						1	28.5
						0	29
						0	29.5
						1	30
						0	30.5
						0	31
						0	31.5
						0	32
						0	32.5
						0	33
						0	33.5
						0	34
						0	34.5
						0	35
						0	35.5
						0	36
						0	36.5
						0	37
						0	37.5
						0	38
						0	38.5
						0	39
						0	39.5
						0	40
						0	40.5
						0	41
						0	41.5
						0	42
						0	42.5
						0	43
						0	43.5
						0	44
						0	44.5
						0	45
						0	45.5
						1	46
						0	46.5
						0	47
						0	47.5
						0	48
						0	48.5
						0	49
						0	49.5
						0	50
						0	50.5
						0	51
						0	51.5
						0	52
						0	52.5
						0	53
						0	53.5
						0	54
						0	54.5
						0	55
						0	55.5
						0	56
						0	56.5
						0	57
						0	57.5
						0	58
						0	58.5
						0	59
						0	59.5
						0	60
						0	60.5
						0	61
						0	61.5
						0	62
						0	62.5
						0	63
						0	63.5
						0	64
						0	64.5
						0	65
						0	65.5
						0	66
						0	66.5
						0	67
						0	67.5
						0	68
						0	68.5
						0	69
						0	69.5
						0	70
						0	70.5
						0	71
						0	71.5
						0	72
						0	72.5
						0	73
						0	73.5
						0	74
						0	74.5
						0	75
						0	75.5
						0	76
						0	76.5
						0	77
						0	77.5
						0	78
						0	78.5
						0	79
						0	79.5
						0	80
						0	80.5
						0	81
						0	81.5
						0	82
						0	82.5
						0	83
						0	83.5
						0	84
						0	84.5
						0	85
						0	85.5
						0	86
						0	86.5
						0	87
						0	87.5
						0	88
						0	88.5
						0	89
						0	89.5
						0	90
						0	90.5
						0	91
						0	91.5
						0	92
						0	92.5
						0	93
						0	93.5
						0	94
						0	94.5
						0	95
						0	95.5
						0	96
						0	96.5
						0	97
						0	97.5
						0	98
						0	98.5
						0	99
						0	99.5
						0	100
						0	100.5
						0	101
						0	101.5
						0	102
						0	102.5
						0	103
						0	103.5
						0	104
						0	104.5
						0	105
						0	105.5
						0	106
						0	106.5
						0	107
						0	107.5
						0	108
						0	108.5
						0	109
						0	109.5
						0	110
						0	110.5
						0	111
						0	111.5
						0	112
						0	112.5
						0	113
						0	113.5
						0	114
						0	114.5
						0	115
						0	115.5
						0	116
						0	116.5
						0	117
						0	117.5
						0	118
						0	118.5
						0	119
						0	119.5
						0	120
						0	120.5
						0	121
						0	121.5
						0	122
						0	122.5
						0	123
						0	123.5
						0	124
						0	124.5
						0	125
						0	125.5
						0	126
						0	126.5
						0	127
						0	127.5
						0	128
						0	128.5
						0	129
						0	129.5
						0	130
						0	130.5
						0	131
						0	131.5
						0	132
						0	132.5
						0	133
						0	133.5
						0	134
						0	134.5
						0	135
						0	135.5
						0	136
						0	136.5
						0	137
						0	137.5
						0	138
						0	138.5
						0	139
						0	139.5
						0	140
						0	140.5
						0	141
						0	141.5
						0	142
						0	142.5
						0	143
						0	143.5
						0	144
						0	144.5
						0	145
						0	145.5
						0	146
						0	146.5
						0	147
						0	147.5
						0	148
						0	148.5
						0	149
						0	149.5
						0	150
						0	150.5
						0	151
						0	151.5
						0	152
						0	152.5
						0	153
						0	153.5
						0	154
						0	154.5
						0	155
						0	155.5
						0	156
						0	156.5
						0	157
						0	157.5
						0	158
						0	158.5
						0	159
						0	159.5
						0	160
						0	160.5
						0	161
						0	161.5
						0	162
						0	162.5
						0	163
						0	163.5
						0	164
						0	164.5
						0	165
						0	165.5
						0	166
						0	166.5
						0	167
						0	167.5
						0	168
						0	168.5
						0	169
						0	169.5
						0	170
						0	170.5
						0	171
						0	171.5
						0	172
						0	172.5
						0	173
						0	173.5
						0	174
						0	174.5
						0	175
						0	175.5
						0	176
						0	176.5
						0	177
						0	177.5
						0	178
						0	178.5
						0	179
						0	179.5
						0	180
						0	180.5
						0	181
						0	181.5
						0	182
						0	182.5
						0	183
						0	183.5
						0	184
						0	184.5
						0	185
						0	185.5
						0	186
						0	186.5
						0	187
						0	187.5
						0	188
						0	188.5
						0	189
						0	189.5
						0	190
						0	190.5
						0	191
						0	191.5
						0	192
						0	192.5
						0	193
						0	193.5
						0	194
						0	194.5
						0	195
						0	195.5
						0	196
						0	196.5
						0	197
						0	197.5
						0	198
						0	198.5
						0	199
						0	199.5
						0	200
						0	200.5
