# Supplementary material for: Kinetic regulation of kinesin’s two motor domains coordinates its stepping along microtubules
Source: eLife. 2025 Apr 17;14:RP106228. doi: 10.7554/eLife.106228 (PMC12005725; doi:10.7554/eLife.106228)
Supplement: Figure 2—source data 1. [file elife-106228-fig2-data1.xlsx]

## Sheet: Sheet1
mantATP binding kobs plot			Fig.2A & Fig.3-suppl 4B
[uM]
conc 60	4/330 Cu	4/330 DTT	47/328 DTT	47/328 Cu	WT conc	WT DTT	WT Cu	conc 60	222/334 DTT	222/334 Cu	47/335 DTT	47/335 Cu
5	100.53	155.21	109.8	48.35	5	165.01	144.71	5	133.51	9.6926	151.7	63.771
10	133.02	158.06	136.64	60.486	10	183.13	179.71	10	160.72	20.837	175.39	84.716
15	162.49	211.17	159.18	70.437	15	226.18	218	15	177.25	31.16	203.68	109.46
20	164.79	259.17	171.34	84.094	25	274.5	287.86	20	247.08	42.42	264.87	131.04
25	220.44	299.43	187.04	103.97	35	327.29	363.08	30	243.74	58.191	349.31	177.71
30	232.47	333.87	220.17	104.84	50	399.87	402.84	40	388.77	66.867	445.97	216.38
40	264.49	334.75	276.28	116.81	60	471.19	489.57	50	355.39	87.216	521.83	250.45
50	300.97	372.21	290.82	148.41				60	400.22	94.111	649.48	319.85
60	322.5	409.23	325.14	158.27
