# Supplementary material for: Kinetic regulation of kinesin’s two motor domains coordinates its stepping along microtubules
Source: eLife. 2025 Apr 17;14:RP106228. doi: 10.7554/eLife.106228 (PMC12005725; doi:10.7554/eLife.106228)
Supplement: Figure 2—source data 2. [file elife-106228-fig2-data2.xlsx]

## Sheet: WT
Fl-ATP binding	WT monomer	time trace	Fig. 2D,E
100 fps
frame	Cy3	Cy5	Cy3	Cy5
1	-15.403	67.699	39.599	56.696
2	-6.432	65.148	16.323	22.363
3	27.916	72.481	17.468	44.696
4	-13.925	84.554	-10.72	33.928
5	22.814	66.337	13.888	31.436
6	-9.157	79.003	15.468	52.189
7	9.423	88.583	15.83	48.638
8	-7.345	88.076	4.483	57.001
9	27.684	81.525	4.903	44.015
10	12.351	69.757	-14.793	25.783
11	4.858	75.163	-25.996	51.899
12	14.785	53.496	10.309	51.624
13	-5.823	66.887	13.642	54.059
14	10.438	70.757	14.584	39.044
15	5.684	60.96	17.396	48.03
16	-0.504	71.264	14.613	54.725
17	-19.519	39.134	4.454	43.45
18	4.496	65.829	-4.996	56.015
19	1.583	77.351	7.178	53.508
20	5.684	45.206	8.599	44.131
21	7.322	56.452	2.004	28.653
22	14.133	70.844	3.613	54.682
23	-4.591	65.597	14.541	27.262
24	4.09	71.989	41.352	5.522
25	1.583	70.829	16.57	47.537
26	11.467	63.612	4.917	47.262
27	-5.475	86.076	21.178	50.537
28	-6.852	76.51	-12.228	43.464
29	-8.417	56.047	15.656	46.349
30	5.887	75.221	8.309	41.754
31	-8.649	70.076	25.512	59.32
32	-6.823	64.481	7.077	45.928
33	8.959	72.467	15.642	37.522
34	4.148	76.757	2.483	40.537
35	24.264	66.974	-1.532	53.798
36	-11.78	59.308	21.178	39.841
37	0.568	65.177	-4.88	41.682
38	7.206	70.003	17.265	53.624
39	15.988	75.032	21.57	68.189
40	-13.026	72.003	2.613	36.378
41	-10.809	87.945	-0.416	42.088
42	4.8	81.931	-4.184	48.58
43	-3.113	75.119	-16.793	35.711
44	2.901	69.887	21.859	41.696
45	8.278	69.264	-1.619	55.262
46	-4.389	66.945	17.468	55.653
47	-14.519	51.554	1.352	38.856
48	14.235	66.192	-2.836	36.479
49	6.901	72.134	15.555	51.363
50	-6.794	60.51	14.787	35.754
51	6.496	65.626	9.961	58.146
52	-1.91	70.09	20.12	56.754
53	18.046	50.641	3.454	40.914
54	-7.823	60.105	-3.822	39.609
55	9.684	84.322	16.323	67.769
56	12.394	72.134	1.729	55.841
57	-8.215	84.438	0.859	52.044
58	-10.838	63.25	-0.735	41.218
59	3.713	68.279	23.57	36.059
60	1.075	64.206	-4.228	27.088
61	-1.302	68.235	13.613	55.58
62	4.669	67.496	4.99	34.986
63	-12.186	76.119	2.28	39.015
64	17.235	63.597	-1.88	41.233
65	-10.157	53.989	9.178	39.334
66	10.104	72.525	-4.735	33.262
67	15.017	66.395	14.584	71.595
68	4.51	55.945	4.801	49.291
69	1.206	68.583	-1.561	57.16
70	-3.055	67.452	-6.662	40.117
71	14.481	76.09	9.164	47.218
72	6.945	56.467	5.526	46.291
73	0.075	56.699	-1.865	48.044
74	8.887	60.206	8.338	42.899
75	0.93	67.293	20.961	55.957
76	-19.519	64.235	7.903	45.972
77	6.264	51.409	8.091	33.812
78	-10.244	52.67	-7.981	45.667
79	-2.012	68.467	8.729	51.464
80	9.394	65.568	-1.749	50.638
81	7.293	68.873	25.135	60.363
82	-3.649	50.612	4.541	48.088
83	-10.273	52.308	6.483	52.204
84	25.438	77.366	-6.793	42.856
85	-22.519	62.061	14.468	68.001
86	3.438	57.757	7.671	63.885
87	30.206	66.148	16.222	61.03
88	5.626	63.221	14.396	38.32
89	-2.041	70.67	-2.358	45.682
90	20.858	61.626	7.613	56.682
91	-12.533	58.047	0.599	58.957
92	13.438	53.395	-1.344	34.305
93	4.684	70.279	-2.43	43.986
94	-16.925	51.003	26.091	47.595
95	6.959	52.684	-1.387	33.044
96	-0.041	71.177	31.425	52.189
97	-7.417	102.916	21.106	41.667
98	13.64	75.337	14.975	46.827
99	-7.939	100.38	14.512	44.551
100	-4.548	88.148	4.41	39.334
101	17.452	95.395	11.048	38.088
102	6.785	87.38	-19.17	42.276
103	23.38	83.626	16.222	37.856
104	1.003	97.322	-1.025	59.189
105	-0.533	114.351	-7.981	52.233
106	2.307	79.67	4.454	53.45
107	5.148	93.728	-7.706	32.609
108	-9.055	89.873	5.497	42.276
109	-16.389	79.206	5.178	49.392
110	-0.215	73.757	14.888	49.609
111	-7.852	89.902	26.468	33.305
112	4.583	74.032	31.917	52.58
113	-0.954	98.771	22.077	44.349
114	9.916	61.192	-13.836	38.059
115	-2.055	60.51	-12.561	56.45
116	7.438	73.829	-10.213	51.986
117	-5.983	70.481	6.338	37.131
118	-8.432	66.061	-9.691	31.885
119	-12.78	72.815	-6.778	42.32
120	1.438	59.786	0.888	45.667
121	-16.287	65.221	-1.445	38.754
122	2.742	45.525	-8.257	47.45
123	-0.649	59.684	-17.199	39.566
124	1.64	54.206	2.801	53.899
125	-6.461	69.525	15.946	57.595
126	-1.229	50.423	-13.822	41.856
127	-9.606	72.38	18.222	53.291
128	-14.374	57.539	12.135	53.073
129	-7.287	70.119	5.613	62.291
130	7.162	82.757	27.193	38.566
131	2.626	72.134	8.729	54.914
132	-1.026	47.018	-9.575	31.566
133	-9.345	58.742	20.265	47.769
134	21.611	61.989	6.512	55.45
135	5.8	80.902	21.28	56.986
136	-2.157	63.931	-2.749	52.088
137	4.771	95.757	1.83	36.841
138	10.38	81.844	-12.851	66.87
139	5.669	78.38	7.758	61.827
140	3.22	87.003	-2.952	41.262
141	3.829	98.337	4.758	34.493
142	-1.316	71.308	14.135	51.914
143	4.032	85.395	2.917	53.001
144	9.162	81.047	21.83	42.189
145	-2.287	81.221	0.526	40.551
146	13.901	89.887	-14.59	49.131
147	-3.287	74.916	14.033	51.175
148	12.93	91.279	14.396	49.131
149	3.611	93.525	2.439	65.407
150	-3.954	88.409	3.787	48.45
151	-5.997	84.264	3.396	36.87
152	26.858	72.018	13.859	46.856
153	15.771	96.583	8.265	42.943
154	-5.925	100.206	6.497	36.856
155	17.771	72.279	6.917	45.334
156	1.046	93.945	-1.996	50.711
157	-1.954	98.713	7.497	15.45
158	12.148	77.061	11.787	58.508
159	16.481	98.366	19.497	53.986
160	-8.432	80.366	21.28	57.928
161	25.293	106.351	0.859	47.566
162	-11.302	84.09	-4.619	45.696
163	-8.678	80.583	15.164	54.291
164	-16.794	71.742	13.874	48.711
165	-0.968	101.003	9.555	45.117
166	11.394	100.206	-17.807	52.001
167	16.539	66.076	7.294	35.392
168	2.974	64.786	-9.952	41.493
169	5.177	83.221	-11.083	58.653
170	-3.113	70.279	4.106	71.508
171	3.727	58.902	-10.358	53.03
172	6.771	66.858	5.439	55.233
173	2.336	81.728	14.439	-5.304
174	-2.446	88.206	0.004	-2.579
175	-0.954	81.916	12.019	7.305
176	-17.838	78.51	0.41	-5.709
177	10.481	82.09	15.468	-0.622
178	-0.012	74.568	25.628	5.87
179	10.119	94.38	26.483	15.479
180	-20.591	79.815	-8.822	3.204
181	12.814	94.134	12.309	-7.463
182	15.409	77.032	-14.909	-2.796
183	11.771	92.945	-1.401	-4.869
184	-9.78	89.293	-5.648	-4.695
185	8.597	100.467	5.729	-7.188
186	-7.316	66.467	-3.662	-6.246
187	21.742	79.192	6.048	3.682
188	-23.968	77.293	3.338	0.928
189	1.293	79.221	-16.677	-7.347
190	-14.345	59.539	7.236	-9.608
191	-32.287	83.134	14.12	9.972
192	1.322	69.887	9.294	-0.217
193	19.322	85.699	4.932	-8.492
194	-3.316	85.641	-7.401	-4.767
195	-2.736	76.337	12.077	5.16
196	-16.446	78.09	-2.749	-2.521
197	18.698	82.974	1.41	-5.289
198	23.568	105.786	-5.865	-1.333
199	7.278	72.221	3.599	-7.811
200	18.597	72.612	7.685	-13.637
201	9.307	77.134	-8.242	13.189
202	-22.36	97.337	9.584	-2.376
203	-11.417	117.525	1.396	-4.767
204	-7.171	87.061	-3.648	-3.536
205	-2.983	103.742	24.772	-0.434
206	-4.562	70.597	16.483	4.812
207	29.438	95.003	5.352	10.32
208	4.727	82.134	19.642	-7.738
209	-3.722	80.337	-1.184	-10.753
210	-21.809	76.409	-3.894	-9.622
211	6.452	69.67	15.309	-3.13
212	24.278	63.409	7.497	-5.014
213	-0.273	88.279	3.888	2.16
214	20.452	90.713	-6.344	-0.188
215	23.742	96.684	9.555	-7.449
216	1.829	86.264	-4.315	2.233
217	-7.331	77.452	24.468	15.117
218	8.655	85.844	16.077	1.233
219	4.278	91.902	-8.112	-1.304
220	-4.504	63.655	2.903	11.725
221	24.322	71.713	-22.996	-12.608
222	13.09	74.496	12.656	0.609
223	17.293	63.337	7.483	4.059
224	-4.577	59.887	-13.807	2.247
225	5.22	56.771	-6.025	-6.304
226	-12.649	53.67	-4.677	-2.434
227	1.467	78.525	-2.938	-5.275
228	1.351	51.337	1.888	3.059
229	0.032	57.684	10.309	6.073
230	11.829	55.96	-2.315	-8.434
231	18.336	59.974	-8.59	2.059
232	21.8	90.786	4.135	-8.767
233	3.843	70.742	-2.286	-0.869
234	0.032	58.105	0.236	-0.202
235	0.756	78.829	-12.3	6.986
236	5.872	54.366	-2.416	2.841
237	0.872	63.38	-6.735	0.073
238	39.452	63.945	-3.822	-3.028
239	-23.635	55.264	6.555	7.305
240	8.133	77.641	-8.749	1.856
241	13.611	53.742	17.367	-1.883
242	4.235	77.206	-3.141	-11.405
243	0.974	68.931	17.555	1.885
244	6.814	65.858	-0.387	-4.333
245	14.293	82.351	2.961	8.45
246	-8.606	37.148	7.28	-10.086
247	-13.128	62.467	-1.938	-4.898
248	2.583	43.264	-3.836	1.102
249	-4.707	67.539	23.091	8.537
250	16.467	65.337	-10.43	7.45
251	8.959	73.945	6.149	-7.536
252	-3.649	75.192	-5.228	-5.159
253	-5.041	58.134	3.222	-1.956
254	4.988	51.047	-6.633	-10.289
255	-4.084	69.409	18.903	7.696
256	2.843	65.568	1.628	11.436
257	11.249	83.105	-1.199	-2.159
258	14.119	67.177	15.236	-8.564
259	-2.345	62.018	-6.764	2.566
260	9.293	54.163	10.671	-1.927
261	25.394	22.134	6.685	10.928
262	57.148	10.308	4.801	10.189
263	48.568	5.96	21.178	-1.724
264	0.742	8.076	-9.619	-4.159
265	5.8	4.366	16.859	6.32
266	0.467	-1.316	7.685	0.58
267	2.525	5.032	9.859	-2.362
268	-2.287	-2.33	14.859	-0.724
269	7.93	-4.417	5.106	6.638
270	15.713	1.525	10.975	-10.97
271	1.785	1.786	11.917	-1.26
272	11.64	-2.417	18.41	-13.84
273	4.727	8.018	10.019	8.667
274	-6.331	9.105	-7.575	-9.072
275	15.554	11.395	10.483	4.87
276	-3.591	3.351	2.135	-3.869
277	12.191	4.351	5.251	3.624
278	-20.533	-4.113	7.062	-15.086
279	28.51	-1.446	-0.561	3.479
280	-14.664	-1.721	2.656	4.001
281	2.061	-4.069	5.468	-1.811
282	7.409	-4.098	16.729	7.725
283	-3.229	15.945	13.99	-4.666
284	4.046	-15.75	3.787	4.798
285	11.032	-1.75	11.367	1.58
286	11.843	2.235	-4.068	-7.507
287	5.452	1.423	26.599	5.972
288	-2.809	6.829	7.338	-10.753
289	15.104	2.641	11.642	-8.622
290	7.075	3.09	-8.996	11.117
291	-4.649	6.452	29.062	-2.072
292	-1.504	-0.243	1.41	-2.405
293	-12.374	-1.519	14.251	3.378
294	1.843	-4.49	-4.459	-0.13
295	14.64	7.134	-2.677	2.073
296	0.162	-5.388	-0.575	-9.854
297	-4.722	4.626	15.656	7.653
298	7.09	-4.504	-2.358	-11.999
299	-4.113	3.554	4.917	4.493
300	-22.997	-3.504	-4.257	5.088
301	-3.287	9.757	13.555	0.957
302	0.771	2.771	-0.199	-11.463
303	13.293	-0.156	14.758	-3.521
304	-10.142	-4.866	7.975	-6.956
305	-2.504	6.989	8.41	5.32
306	-23.229	2.67	-4.358	-7.057
307	3.8	0.003	4.149	-5.449
308	13.916	0.351	-4.286	-1.217
309	-3.809	7.206	23.236	9.827
310	-3.649	9.728	24.396	-2.028
311	-12.751	3.496	-13.996	-9.246
312	-7.649	5.51	11.816	-2.536
313	15.293	5.032	-20.749	-6.55
314	1.974	-1.91	-3.677	-1.463
315	-1.287	4.409	9.091	12.798
316	8.611	-3.461	4.917	-4.869
317	-6.041	24.757	18.381	-3.086
318	-9.446	12.887	0.149	6.392
319	-5.389	8.742	0.497	2.059
320	-22.649	5.192	6.483	2.059
321	-21.186	15.163	12.497	2.464
322	2.8	-11.374	5.381	7.45
323	5.814	5.076	11.352	12.711
324	30.698	1.626	7.497	-4.405
325	-15.968	1.409	1.642	-6.608
326	5.206	-0.2	11.845	1.001
327	-15.823	13.525	1.236	-4.478
328	-3.997	1.293	-16.938	-2.333
329	3.119	13.8	-10.517	-8.985
330	9.539	-0.852	15.454	-3.825
331	6.525	-1.968	-4.488	-9.202
332	5.742	3.887	-10.025	5.783
333	-11.055	-3.692	-9.315	-7.521
334	19.119	8.641	-10.155	-2.028
335	-5.867	-2.229	3.656	3.044
336	-2.244	-6.258	14.468	-0.304
337	7.148	0.119	4.859	4.392
338	-9.954	-4.649	10.28	-8.115
339	-2.49	4.351	17.062	6.088
340	-17.36	3.568	-3.619	-3.043
341	3.64	0.742	5.526	3.479
342	-1.012	7.844	7.12	-0.782
343	12.365	11.134	9.077	-1.144
344	-3.823	-5.171	-6.01	-2.217
345	42.075	8.221	7.338	-10.564
346	-10.736	-7.214	0.874	-3.188
347	7.669	6.51	-14.315	-2.564
348	-3.983	7.279	-15.909	-10.376
349	14.264	7.945	-6.3	-9.622
350	-4.736	-3.953	7.772	0.624
351	24.887	-0.127	0.193	-5.318
352	-10.519	-7.475	15.062	1.972
353	14.423	-3.359	-0.3	-1.159
354	-10.838	4.264	4.193	-7.883
355	23.423	3.974	10.004	-2.854
356	-8.461	-9.634	-10.691	3.551
357	-3.649	-10.591	20.932	-0.347
358	4.061	-3.374	-6.083	-8.275
359	15.481	16.061	5.149	-4.202
360	-0.461	8.395	-19.257	-0.666
361	25.38	-3.055	-1.083	-0.028
362	-10.968	-0.765	-15.807	0.885
363	10.104	0.525	-8.141	-9.449
364	32.583	6.438	-12.242	-4.898
365	12.104	5.279	4.077	-1.014
366	-9.157	-0.272	6.193	-7.97
367	-22.099	1.337	5.917	3.537
368	2.278	8.858	0.816	0.131
369	-3.722	15.032	0.859	4.378
370	-17.171	-1.924	-14.894	-2.68
371	-7.157	8.525	15.772	4.856
372	0.974	1.003	23.888	-4.376
373	6.611	-1.982	-6.604	-2.521
374	-11.736	5.395	7.801	-3.289
375	9.945	10.134	3.28	-6.622
376	14.322	-1.968	-0.271	2.189
377	2.046	9.047	12.975	-5.825
378	7.322	6.235	-15.561	-8.608
379	13.872	4.844	2.193	-2.318
380	1.394	5.003	-12.286	1.291
381	28.597	12.423	-4.938	-1.941
382	2.525	2.887	0.946	-0.985
383	18.003	7.105	26.584	0.856
384	5.046	3.148	-7.532	-0.072
385	27.64	8.264	-1.996	-1.115
386	3.336	0.206	7.323	0.609
387	-3.823	5.264	19.99	1.146
388	24.525	-2.533	-2.213	-0.579
389	12.104	-4.185	1.613	3.566
390	-4.881	-3.417	1.903	-3.941
391	17.177	13.163	1.628	-7.318
392	-19.026	-7.939	-1.474	-4.695
393	11.322	6.67	12.874	-9.086
394	14.496	3.308	-11.01	-11.796
395	23.756	3.279	2.294	2.305
396	7.061	-2.359	-0.836	-12.043
397	8.351	15.423	-10.097	-6.695
398	17.235	2.061	4.207	-1.217
399	16.467	-1.721	-5.199	1.551
400	12.438	-1.316	11.874	-2.014
401	15.785	7.25	1.932	-1.463
402	13.655	15.032	21.396	-3.724
403	7.104	6.293	5.83	0.783
404	10.264	1.163	12.599	-10.84
405	4.032	-0.171	10.338	-2.608
406	11.988	-0.432	15.019	-3.478
407	15.756	0.641	-12.416	-17.347
408	1.394	2.192	19.714	-0.405
409	5.423	0.989	6.541	3.696
410	3.829	-1.866	5.193	-5.651
411	28.017	15.989	-7.271	-8.275
412	-1.678	-2.649	-16.503	-8.593
413	29.887	-4.2	-2.329	-7.072
414	-15.389	-9.2	5.859	0.247
415	6.38	12.264	12.729	-3.492
416	-6.142	-0.91	-6.054	-3.782
417	19.626	-4.417	23.12	0.16
418	16.336	-4.403	-20.401	8.638
419	2.727	5.771	17.584	-6.101
420	-10.128	-7.098	2.758	-12.521
421	14.539	0.496	18.613	0.769
422	-1.91	2.003	-3.662	-6.463
423	1.22	4.742	-5.286	5.812
424	-15.838	-7.011	10.28	-5.985
425	6.814	4.061	4.004	8.001
426	5.307	-5.127	-15.88	-3.333
427	6.032	2.438	28.396	2.247
428	6.959	11.409	19.265	-2.651
429	13.09	-3.533	-12.126	-0.898
430	25.872	-2.49	23.99	8.667
431	17.307	8.597	-3.807	2.291
432	-9.939	-1.939	-5.344	-17.97
433	9.365	6.032	10.12	2.305
434	-15.562	-4.142	-2.315	-6.521
435	4.597	5.395	-3.112	14.74
436	41.119	-2.388	18.439	-4.449
437	15.568	-2.982	13.367	-4.709
438	-3.316	-11.113	6.106	-6.115
439	-1.997	-0.127	-2.503	-8.507
440	25.554	11.684	-4.387	-3.463
441	4.075	9.931	-23.097	-1.883
442	2.177	6.539	6.584	4.58
443	-10.316	-2.519	4.584	-6.68
444	-1.099	7.366	12.555	-3.811
445	16.988	1.757	-6.604	2.015
446	-8.606	4.829	4.468	-5.086
447	-1.417	5.105	-1.619	9.783
448	21.945	5.8	-6.59	-6.695
449	-4.606	8.945	-0.126	-0.521
450	-7.026	1.003	21.019	-3.492
451	3.075	19.076	4.99	24.45
452	10.394	-10.272	-16.793	-3.68
453	1.38	7.829	-2.271	7.624
454	1.206	-8.185	2.396	-1.115
455	3.669	10.757	11.671	10.088
456	-5.562	1.887	-7.083	-14.376
457	-6.693	-9.185	11.685	-4.579
458	0.496	6.09	-2.952	-7.738
459	10.597	3.51	-1.749	1.667
460	7.496	-9.663	8.787	-14.202
461	-7.475	20.583	9.845	-0.84
462	-0.215	3.061	-10.619	-2.405
463	21.713	4.989	16.512	15.827
464	-6.171	-9.779	19.859	4.175
465	17.959	4.351	-11.459	4.32
466	16.626	2.612	-15.054	1.291
467	5.249	6.395	28.497	0.117
468	1.872	-8.504	9.004	-6.405
469	-12.997	2.438	14.338	-0.564
470	-4.562	8.815	6.656	-15.188
471	3.496	-2.968	2.772	-10.449
472	11.017	3.163	-16.851	-10.593
473	18.365	7.902	13.352	6.16
474	-11.287	-2.939	11.845	-4.637
475	12.394	8.989	-3.445	12.233
476	-7.968	-11.185	5.294	-0.086
477	3.061	-5.779	3.888	-5.608
478	-10.012	-10.924	1.975	-7.159
479	-2.07	0.989	8.888	9.044
480	-6.084	2.51	7.352	-0.188
481	10.496	-2.258	3.193	-4.608
482	0.061	8.322	-6.228	-9.68
483	14.887	6.554	2.99	-5.101
484	-7.533	-1.895	6.743	4.638
485	-20.896	3.047	9.381	-0.651
486	1.452	6.96	2.251	-10.347
487	26.655	-2.475	11.41	-2.898
488	-21.345	3.38	14.251	1.102
489	1.684	0.641	-1.691	-1.014
490	5.075	-10.823	-2.17	1.204
491	-15.446	-1.577	11.729	0.595
492	-14.635	-7.026	2.541	-4.796
493	-0.432	10.684	7.555	8.769
494	3.597	-3.968	-3.372	-3.26
495	13.597	7.583	-9.344	1.783
496	14.38	-7.345	-4.271	1.189
497	19.162	4.887	1.845	-9.26
498	19.713	6.96	-12.981	-5.405
499	6.655	6.481	11.483	7.233
500	-20.475	1.974	-8.735	-9.26

## Sheet: E236A
Fl-ATP binding	E235A monomer
5 fps
frame	Cy3	Cy5
1	0.661	12.183
2	0.777	9.299
3	-2.296	11.691
4	0.965	9.024
5	2.313	9.908
6	-0.904	12.314
7	3.11	12.98
8	-0.136	7.14
9	2.501	9.169
10	-0.774	9.691
11	-0.658	11.198
12	3.183	9.357
13	0.806	12.618
14	0.646	10.299
15	-1.658	9.575
16	0.052	12.198
17	-0.673	11.285
18	-1.513	11.43
19	0.617	10.995
20	-0.136	9.314
21	-0.832	9.401
22	-0.73	8.415
23	2.646	10.966
24	1.023	9.922
25	-0.31	12.299
26	0.429	9.56
27	-2.107	7.734
28	-0.571	9.56
29	2.226	8.995
30	0.777	9.372
31	1.342	13.009
32	-1.528	9.821
33	0.356	11.937
34	-0.702	11.343
35	-0.383	9.908
36	0.748	9.72
37	0.139	10.517
38	-0.252	10.082
39	-0.397	7.922
40	-0.455	9.053
41	2.733	12.763
42	0.27	5.444
43	2.429	8.748
44	-2.049	13.328
45	-0.31	10.502
46	-0.528	10.763
47	0.849	9.27
48	0.893	10.502
49	-0.296	9.009
50	-0.861	8.299
51	0.11	10.024
52	1.545	8.444
53	-1.136	9.633
54	-2.412	10.473
55	-0.977	10.096
56	-1.948	9.748
57	0.719	11.951
58	1.414	11.951
59	1.255	11.343
60	0.965	11.763
61	-1.064	10.154
62	0.255	8.285
63	2.11	10.198
64	0.385	12.937
65	-0.354	9.546
66	0.806	10.98
67	1.661	11.792
68	-0.803	9.604
69	3.516	13.488
70	-1.064	11.98
71	4.038	9.835
72	-0.817	9.227
73	1.733	12.038
74	-1.093	8.56
75	0.154	8.72
76	0.965	11.256
77	-0.716	8.633
78	1.212	8.343
79	-2.759	9.575
80	-1.194	12.343
81	-1.078	8.98
82	-1.078	8.734
83	0.98	10.531
84	-2.47	8.777
85	2.632	8.792
86	-1.354	9.169
87	0.893	12.328
88	-1.528	10.038
89	0.197	10.357
90	0.748	7.879
91	0.849	10.734
92	-0.209	8.864
93	-1.02	6.966
94	1.067	9.212
95	0.255	11.792
96	-1.441	12.299
97	-1.977	8.705
98	-0.441	7.546
99	-0.455	8.777
100	-1.368	11.647
101	0.835	11.227
102	-0.673	10.198
103	-0.18	8.125
104	-0.31	13.328
105	-0.962	11.328
106	-1.354	7.792
107	-2.803	7.951
108	1.284	12.256
109	-2.368	9.604
110	-0.977	8.357
111	-1.629	7.43
112	1.284	11.647
113	0.313	8.893
114	-1.049	9.618
115	4.067	9.372
116	-1.035	7.575
117	1.893	10.14
118	2.183	9.908
119	0.574	12.647
120	-1.049	9.096
121	3.617	10.618
122	0.646	10.792
123	1.559	10.792
124	-0.238	9.792
125	0.545	9.633
126	-2.817	10.227
127	3.371	8.299
128	4.081	10.096
129	1.168	10.517
130	-0.919	8.27
131	0.704	5.937
132	0.849	7.415
133	-1.122	9.72
134	-0.644	9.357
135	2.414	11.212
136	-1.035	8.343
137	3.98	10.343
138	0.067	9.517
139	3.951	9.951
140	1.443	11.792
141	1.414	9.835
142	0.864	9.27
143	-0.702	12.937
144	-1.151	7.517
145	0.588	10.647
146	0.559	9.922
147	3.922	9.43
148	-0.73	10.082
149	1.603	9.198
150	-0.658	9.473
151	0.704	10.415
152	0.806	9.169
153	1.806	8.792
154	0.168	10.763
155	-1.18	8.082
156	-1.687	9.27
157	0.661	9.748
158	-1.919	9.647
159	1.849	10.922
160	-1.383	10.589
161	4.154	8.676
162	0.69	8.806
163	0.487	10.98
164	-1.397	9.575
165	1.632	13.009
166	1.603	8.85
167	-1.513	8.777
168	0.907	11.85
169	0.762	8.314
170	-0.991	10.43
171	0.733	8.357
172	-1.702	12.096
173	-0.412	6.705
174	-1.499	11.401
175	-0.412	9.183
176	1.154	9.531
177	-0.571	7.401
178	-0.557	9.285
179	-1.049	9.647
180	-0.846	9.98
181	0.922	9.053
182	-1.977	9.154
183	1.212	10.053
184	0.835	8.169
185	1.038	7.256
186	-1.035	9.937
187	0.762	8.662
188	1.197	11.444
189	-0.919	11.56
190	1.574	10.212
191	0.125	9.328
192	1.777	11.835
193	4.675	9.009
194	0.298	11.618
195	-1.368	12.154
196	1.371	8.43
197	1.777	10.966
198	-1.962	10.024
199	-0.339	11.864
200	1.835	8.169
201	-1.368	11.473
202	0.806	11.85
203	0.212	8.806
204	-1.513	11.256
205	0.356	10.806
206	-0.586	11.908
207	0.777	10.821
208	2.298	9.995
209	0.11	16.56
210	1.487	9.328
211	-1.223	8.676
212	2.501	10.864
213	0.893	11.835
214	0.298	10.995
215	0.632	12.096
216	0.907	13.299
217	1.69	12.56
218	0.125	10.038
219	-1.47	8.285
220	-0.513	10.14
221	2.4	10.647
222	-0.629	9.864
223	0.951	9.473
224	-0.991	8.792
225	3.994	11.43
226	1.154	12.43
227	1.733	11.082
228	1.965	9.995
229	0.298	8.922
230	-1.919	10.386
231	2.951	12.212
232	-0.948	9.647
233	5.11	4.256
234	5.748	5.053
235	10.82	5.125
236	6.82	1.893
237	4.096	6.14
238	-1.759	9.734
239	-0.716	10.575
240	0.603	17.676
241	3.023	8.415
242	-0.673	10.488
243	0.806	13.154
244	0.748	10.067
245	-0.962	14.908
246	0.038	10.328
247	0.458	12.647
248	-0.267	8.473
249	0.487	12.328
250	1.023	8.633
251	2.545	6.053
252	8.791	2.357
253	6.661	3.43
254	8.733	1.357
255	3.806	6.56
256	0.777	10.792
257	5.067	6.502
258	0.313	11.038
259	1.414	9.488
260	-0.586	8.227
261	0.864	11.444
262	2.574	8.777
263	-1.122	10.763
264	0.791	10.314
265	-0.006	11.096
266	-2.817	9.357
267	1.777	14.198
268	0.907	12.777
269	0.516	12.922
270	-1.817	9.893
271	0.284	9.357
272	-0.339	9.154
273	-0.875	12.024
274	-2.702	6.908
275	-0.412	9.357
276	-1.035	8.517
277	-0.933	11.647
278	-1.861	10.154
279	-0.861	8.633
280	-0.194	7.821
281	0.791	10.748
282	0.574	7.792
283	-0.586	10.241
284	-0.817	11.72
285	-0.803	12.357
286	-1.223	9.777
287	-0.788	10.966
288	-0.73	9.995
289	-0.557	11.647
290	0.82	6.473
291	1.125	10.038
292	0.298	12.125
293	-1.093	8.951
294	2.516	13.067
295	1.516	11.459
296	-1.571	7.922
297	0.342	10.995
298	0.284	9.806
299	1.878	10.647
300	1.806	9.169
301	-0.586	10.589
302	-0.716	12.618
303	-0.296	13.096
304	-1.499	11.285
305	2.27	10.154
306	0.487	9.372
307	2.806	9.256
308	-1.484	14.27
309	2.603	13.589
310	-1.644	10.72
311	0.298	11.502
312	2.284	10.009
313	1.472	12.517
314	0.878	10.575
315	-1.615	13.038
316	-0.238	8.908
317	1.183	15.517
318	-0.006	9.299
319	0.864	14.009
320	0.023	12.067
321	0.574	13.488
322	2.719	13.56
323	1.965	14.835
324	-1.252	12.835
325	0.298	10.777
326	-0.47	12.908
327	0.835	11.299
328	0.443	12.777
329	1.414	11.589
330	-0.426	8.734
331	0.501	14.575
332	-1.499	14.604
333	-1.267	12.908
334	0.994	7.691
335	2.675	3.995
336	7.067	2.299
337	7.704	3.314
338	6.139	1.053
339	2.675	9.314
340	-1.441	8.096
341	-0.586	7.285
342	-1.151	9.111
343	-0.658	7.154
344	-0.803	10.705
345	-0.788	10.169
346	0.023	8.589
347	2.762	9.256
348	-1.397	9.256
349	-2.209	5.009
350	-1.73	11.792
351	-0.035	11.401
352	2.052	11.821
353	0.777	10.386
354	-1.803	9.835
355	-0.18	10.328
356	-0.948	8.589
357	-1.02	9.125
358	-0.586	10.154
359	-0.817	10.633
360	-1.354	8.922
361	0.791	9.053
362	0.443	8.256
363	-0.093	13.662
364	1.168	11.096
365	0.125	8.589
366	-0.006	11.14
367	1.646	12.198
368	0.936	9.72
369	1.458	8.125
370	0.385	9.43
371	0.27	10.024
372	-0.223	7.72
373	0.241	11.575
374	0.385	9.328
375	2.733	10.415
376	1.11	7.502
377	-0.861	9.43
378	-0.687	8.937
379	-1.557	9.473
380	-0.209	10.212
381	0.197	8.183
382	-1.064	9.067
383	0.487	13.169
384	-0.223	9.27
385	-0.542	9.864
386	-0.716	11.111
387	-1.252	10.676
388	2.067	8.575
389	0.893	10.198
390	-0.339	6.183
391	3.632	11.879
392	-1.107	8.473
393	-1.238	6.444
394	-0.658	11.676
395	-0.933	9.748
396	0.936	10.14
397	0.458	10.299
398	-0.571	6.502
399	-1.281	8.792
400	-1.02	8.517
401	0.4	10.893
402	-1.339	10.328
403	1.298	11.734
404	2.125	10.966
405	0.038	11.169
406	-0.542	13.198
407	-0.629	7.575
408	0.313	8.937
409	0.69	8.589
410	-0.194	8.038
411	0.052	12.183
412	-0.441	10.401
413	0.936	12.43
414	2.385	12.198
415	-0.049	9.401
416	-2.673	8.618
417	-0.817	11.212
418	-0.47	9.604
419	2.038	11.067
420	-1.397	9.676
421	2.487	12.575
422	-1.629	8.285
423	0.356	11.575
424	-1.267	8.038
425	2.168	11.604
426	-0.846	9.038
427	2.139	12.459
428	-0.484	11.531
429	0.472	11.589
430	2.139	10.575
431	1.748	12.459
432	0.472	8.183
433	2.009	10.067
434	-1.441	9.864
435	0.385	12.56
436	-1.673	9.589
437	2.052	8.748
438	-0.252	5.473
439	0.588	9.908
440	2.472	9.43
441	-1.745	9.691
442	0.212	14.285
443	-0.644	11.502
444	-1.049	8.357
445	-0.615	10.169
446	2.226	8.966
447	1.298	9.154
448	-1.513	9.589
449	-0.991	11.14
450	5.125	10.43
451	-1.035	8.067
452	-0.948	6.691
453	-1.31	13.096
454	0.98	8.951
455	1.327	11.72
456	0.11	11.096
457	2.313	9.98
458	1.878	9.647
459	2.183	11.821
460	1.038	8.72
461	-0.18	8.56
462	3.53	8.502
463	-1.6	9.038
464	-1.325	5.748
465	-0.542	11.082
466	-2.513	5.806
467	-0.049	11.125
468	-0.484	9.343
469	0.936	10.85
470	0.081	7.14
471	1.748	10.038
472	-3.122	6.676
473	0.646	13.328
474	1.69	9.995
475	1.748	11.575
476	1.125	9.473
477	1.472	13.111
478	-1.064	6.531
479	0.777	9.56
480	-1.281	11.72
481	1.284	10.444
482	-0.977	9.241
483	-0.832	12.937
484	0.849	9.951
485	0.11	11.27
486	-0.542	8.43
487	-0.136	9.589
488	-0.035	10.357
489	0.168	8.56
490	-0.209	10.053
491	0.951	11.053
492	0.806	9.531
493	0.298	12.72
494	-1.31	6.285
495	-0.267	10.488
496	1.096	11.154
497	1.704	9.835
498	-0.093	8.937
499	2.835	10.604
500	1.748	9.473
501	-1.107	10.27
502	3.414	6.792
503	1.588	10.241
504	0.907	7.169
505	2.443	10.908
506	0.936	8.835
507	1.806	6.328
508	0.009	7.009
509	0.4	9.517
510	0.704	7.85
511	0.719	7.748
512	1.067	6.198
513	-1.194	8.662
514	1.82	8.618
515	2.356	14.241
516	-0.412	6.864
517	2.009	10.908
518	-0.426	11.343
519	0.11	7.111
520	2.603	11.705
521	2.125	10.328
522	0.197	7.763
523	1.385	10.85
524	0.472	8.937
525	1.574	8.604
526	0.849	10.024
527	0.762	11.053
528	1.516	8.763
529	1.081	11.299
530	0.327	7.662
531	1.849	8.792
532	1.154	7.98
533	0.298	9.14
534	-0.89	8.604
535	1.212	7.835
536	-2.615	6.618
537	3.009	10.183
538	-2.035	10.111
539	-0.078	8.633
540	0.009	9.575
541	-0.484	9.763
542	5.125	2.314
543	5.516	2.444
544	7.777	1.705
545	6.762	2.14
546	5.719	0.154
547	5.994	0.56
548	3.168	1.691
549	6.342	4.212
550	2.516	8.415
551	1.154	7.575
552	-2.687	6.256
553	3.777	7.835
554	-1.267	8.256
555	-0.658	7.951
556	-1.136	8.85
557	0.487	7.604
558	-0.209	8.705
559	2.212	11.082
560	2.704	7.459
561	1.11	10.633
562	1.501	7.835
563	1.298	13.546
564	2.284	9.922
565	-0.122	9.72
566	1.965	9.053
567	3.617	8.893
568	-0.383	10.169
569	0.212	11.908
570	1.907	6.111
571	0.849	9.43
572	-1.658	6.169
573	2.588	10.386
574	1.139	9.893
575	3.255	10.575
576	3.878	11.227
577	1.588	10.096
578	-3.035	10.082
579	-0.484	7.517
580	-1.296	7.676
581	0.385	10.473
582	-1.73	8.995
583	-0.325	9.589
584	1.719	10.806
585	2.385	8.14
586	-0.093	8.72
587	0.719	12.937
588	-1.513	8.937
589	-0.542	9.893
590	-1.209	9.676
591	-1.615	8.922
592	-0.499	9.734
593	-0.223	7.038
594	0.385	10.473
595	-0.47	10.415
596	-0.861	9.024
597	1.777	12.444
598	0.313	9.908
599	-0.977	11.575
600	-0.6	7.502
601	0.154	10.705
602	0.226	9.198
603	-0.803	7.966
604	-1.281	12.27
605	-0.89	8.227
606	1.936	11.633
607	1.762	10.835
608	1.298	9.691
609	-0.455	7.705
610	0.241	9.27
611	0.994	11.038
612	-0.339	10.618
613	1.719	9.662
614	-1.165	5.618
615	-0.716	10.575
616	-0.455	8.763
617	-1.006	9.096
618	-0.586	8.401
619	-0.093	10.459
620	2.777	10.806
621	-0.513	7.806
622	2.632	11.154
623	1.125	9.386
624	-1.093	7.56
625	1.197	10.256
626	-1.817	10.792
627	1.212	12.27
628	-2.788	8.879
629	1.052	8.154
630	0.545	9.328
631	-1.136	9.415
632	1.096	10.169
633	-1.557	10.082
634	-0.049	7.705
635	1.748	7.647
636	-1.296	11.792
637	0.574	10.777
638	-0.499	7.806
639	2.588	9.937
640	-0.209	9.604
641	-1.673	9.908
642	-2.629	7.024
643	5.53	4.922
644	4.632	4.879
645	2.733	10.024
646	0.806	7.908
647	-0.267	2.198
648	-0.252	1.459
649	1.704	2.212
650	-0.441	0.43
651	-0.484	-0.773
652	-2.267	-0.049
653	1.791	-1.092
654	-1.252	1.444
655	-0.832	0.633
656	0.806	2.14
657	1.733	1.357
658	-1.238	1.067
659	0.241	0.415
660	0.458	0.343
661	-0.977	1.024
662	0.661	0.459
663	-1.325	-1.049
664	-1.644	1.444
665	-0.455	0.922
666	-2.441	-0.889
667	0.183	1.082
668	-2.151	-1.86
669	-0.368	1.024
670	0.501	0.835
671	2.023	0.328
672	-2.107	1.125
673	0.617	-0.701
674	-1.455	0.517
675	-1.006	1.821
676	2.951	2.299
677	0.052	1.922
678	0.385	-0.933
679	1.284	-0.28
680	2.125	0.459
681	-0.716	1.777
682	0.501	1.473
683	0.009	-0.237
684	-0.991	0.14
685	-0.194	2.198
686	-2.615	-0.686
687	-1.18	0.401
688	-1.325	0.314
689	2.298	1.198
690	-3.339	-0.541
691	-0.615	0.691
692	0.356	0.212
693	-0.136	-0.324
694	0.603	-0.483
695	-1.716	-0.715
696	-2.354	-0.121
697	1.212	-0.353
698	-1.89	-1.86
699	1.617	0.314
700	-1.499	0.096
701	-0.093	0.067
702	-2.397	-0.541
703	-3.441	-0.86
704	-4.107	-1.266
705	-0.165	0.777
706	-0.078	1.705
707	-1.441	-0.136
708	-1.455	0.082
709	-1.788	1.328
710	-0.078	2.009
711	-1.325	0.154
712	0.458	2.444
713	0.574	3.082
714	-1.209	2.256
715	0.081	0.618
716	-1.339	0.488
717	-2.136	0.198
718	0.878	0.111
719	1.052	1.821
720	0.067	-0.657
721	-0.078	0.111
722	-0.615	0.241
723	-0.687	0.748
724	-2.528	0.082
725	0.255	0.748
726	-1.702	-0.063
727	-0.397	0.372
728	-0.238	-0.628
729	-0.89	0.111
730	-1.745	0.488
731	0.11	0.908
732	-0.716	-0.208
733	-1.658	-0.005
734	2.458	0.676
735	-0.557	-0.802
736	-0.948	-0.309
737	-0.962	0.14
738	0.255	0.966
739	-1.281	0.647
740	1.327	0.893
741	-1.397	2.27
742	-2.977	0.299
743	-0.47	0.604
744	0.385	-0.672
745	1.516	0.676
746	-2.455	-0.15
747	1.414	2.038
748	-1.31	-0.889
749	-0.948	0.546
750	-0.977	-1.556
751	0.922	0.183
752	-1.122	-0.541
753	0.038	0.56
754	-1.528	0.647
755	-1.673	0.966
756	0.241	-0.121
757	-0.933	0.893
758	-1.238	-0.411
759	-0.528	3.676
760	0.154	0.169
761	-1.049	0.748
762	-2.281	-1.252
763	-0.586	0.082
764	-1.47	-2.962
765	0.241	-0.599
766	-1.542	1.821
767	-1.484	0.386
768	-2.817	0.531
769	2.241	0.444
770	-2.049	-1.266
771	0.994	1.082
772	-1.049	0.937
773	-1.006	0.169
774	-4.325	-2.585
775	-0.962	0.299
776	-0.832	0.372
777	1.052	0.72
778	1.443	0.314
779	-1.629	1.241
780	-1.165	0.864
781	-0.557	-0.933
782	-1.875	0.241
783	-0.557	-0.643
784	-1.817	-0.875
785	-0.31	-0.628
786	-1.02	1.067
787	0.241	0.995
788	0.501	1.72
789	-1.542	2.256
790	1.212	-0.817
791	-0.571	0.009
792	0.559	0.806
793	-0.412	1.386
794	-0.832	1.821
795	0.791	-0.454
796	0.067	-1.309
797	2.603	0.879
798	0.067	0.763
799	0.4	-0.136
800	-0.064	0.212
801	-0.803	0.879
802	-1.919	0.966
803	2.835	-0.875
804	-2.875	0.98
805	-1.919	0.038
806	1.168	1.082
807	4.183	-0.15
808	-0.513	-0.527
809	-0.426	3.43
810	-1.252	-0.223
811	-1.296	0.328
812	-2.223	-0.889
813	0.139	-0.049
814	0.154	0.546
815	0.516	0.27
816	-0.499	-1.933
817	1.472	1.241
818	-3.223	0.169
819	-2.774	-0.933
820	-2.47	-1.28
821	-0.658	-0.483
822	-1.687	-0.252
823	0.313	2.009
824	2.675	1.502
825	0.458	0.27
826	-2.02	-0.498
827	-1.078	0.096
828	-0.339	1.111
829	0.849	0.227
830	-1.194	-0.049
831	-0.513	-0.078
832	0.603	2.401
833	0.791	0.864
834	-0.252	-0.788
835	-0.702	0.473
836	-1.122	2.517
837	-1.354	0.024
838	-0.644	-0.136
839	-0.151	-0.324
840	-0.426	0.125
841	2.11	2.096
842	0.864	0.98
843	-0.035	1.662
844	-0.557	0.995
845	-1.223	0.575
846	-3.18	-0.107
847	-2.107	0.908
848	-2.455	-1.367
849	-1.875	1.241
850	-0.078	-0.165
851	1.951	1.125
852	-1.455	1.415
853	0.516	0.473
854	-0.165	0.517
855	0.501	0.864
856	-1.02	-0.063
857	0.472	0.299
858	-0.861	0.821
859	2.371	1.328
860	0.038	0.067
861	0.516	-0.672
862	-2.252	-0.991
863	-0.02	0.154
864	-0.064	-0.643
865	0.371	0.879
866	-1.861	1.937
867	0.414	1.009
868	0.501	1.285
869	-0.383	0.821
870	0.096	1.604
871	0.893	1.604
872	-2.629	-0.15
873	-0.977	2.922
874	-1.18	1.575
875	0.096	-0.411
876	0.965	0.995
877	-0.47	-1.237
878	-2.049	-0.121
879	-0.31	1.473
880	0.82	-0.107
881	1.472	1.415
882	-0.078	2.328
883	-2.18	-0.223
884	-2.325	-0.512
885	-0.136	0.531
886	-0.354	2.517
887	-2.122	-0.165
888	-2.151	-0.136
889	0.154	-1.194
890	2.53	0.169
891	2.183	0.951
892	-2.354	-0.889
893	-0.296	-0.57
894	0.183	0.734
895	1.067	2.285
896	-0.281	1.691
897	-1.629	-0.309
898	-0.803	-0.237
899	-0.658	-0.063
900	-1.064	-1.367
901	-0.02	-0.846
902	-0.209	1.893
903	2.443	1.633
904	-0.252	-0.918
905	0.385	1.748
906	-0.368	-0.962
907	-0.557	2.241
908	-1.397	0.676
909	0.835	0.328
910	0.632	2.56
911	-1.73	-0.744
912	-3.528	0.343
913	-0.151	0.908
914	-1.383	1.053
915	-1.194	1.386
916	-3.223	1.212
917	1.632	0.43
918	0.052	1.198
919	1.125	3.343
920	0.82	1.473
921	0.501	0.676
922	0.081	1.343
923	1.4	1.777
924	-2.47	-0.194
925	-0.528	-1.107
926	0.864	0.922
927	-0.397	1.633
928	-1.6	-1.454
929	1.53	-0.165
930	-0.629	-0.324
931	2.545	0.691
932	-0.702	-0.396
933	-0.933	0.096
934	0.893	0.792
935	0.009	3.111
936	-0.093	-0.309
937	-2.571	1.227
938	-2.426	0.951
939	0.081	-0.136
940	0.458	0.256
941	0.69	1.676
942	1.4	-0.889
943	0.212	2.372
944	-0.267	0.966
945	0.009	1.517
946	-2.383	0.517
947	0.429	0.734
948	0.125	-0.237
949	-0.02	1.821
950	-1.383	1.966
951	-0.948	0.198
952	-0.238	-0.643
953	-0.455	1.27
954	-1.919	-0.918
955	0.067	1.009
956	-3.209	-1.367
957	-0.281	0.227
958	-0.774	-0.165
959	-2.209	0.372
960	-3.383	0.111
961	-1.194	0.835
962	-0.049	0.067
963	1.617	0.676
964	-0.499	1.531
965	0.342	-0.005
966	-3.542	-0.657
967	1.313	1.14
968	-0.513	0.618
969	-1.281	-0.599
970	-0.209	-0.643
971	-1.919	0.372
972	-0.281	-0.353
973	-0.093	0.98
974	-1.136	-0.252
975	1.443	0.98
976	-2.267	2.125
977	-1.078	1.546
978	-1.368	0.357
979	-1.397	-0.556
980	-3.528	-0.962
981	-2.846	0.212
982	-2.194	0.183
983	-1.962	1.922
984	-1.368	-0.57
985	-0.542	-0.194
986	-1.296	0.183
987	-0.919	-0.599
988	-1.513	-0.324
989	-2.209	0.459
990	-0.339	-1.454
991	-0.064	0.806
992	0.371	-0.686
993	0.342	2.314
994	0.922	-1.28
995	-2.049	1.517
996	0.603	-0.57
997	-0.194	0.72
998	-1.455	-1.063
999	-0.687	1.198
1000	-1.426	-0.614
