# Supplementary material for: Kinetic regulation of kinesin’s two motor domains coordinates its stepping along microtubules
Source: eLife. 2025 Apr 17;14:RP106228. doi: 10.7554/eLife.106228 (PMC12005725; doi:10.7554/eLife.106228)
Supplement: Figure 3—figure supplement 1—source data 1. [file elife-106228-fig3-figsupp1-data1.xlsx]

## Sheet: Sheet1
Light scattering trace		ATP-induced MT dissociation			Fig.3-suppl 1,4
Timer 0.4s	DTT 0.4s	Cu 0.4s	Timer 1s	WT DTT 1s	WT Cu 1s	47/328 DTT 1s	47/328 Cu 1s	47/335 DTT 1s	47/335 Cu 1s	4/330 DTT 1s	4/330 Cu 1s	222/334 DTT 1s	222/334 Cu 1s
0.0004	0.724918	0.596571	0.001	0.583256	0.583256	0.824582	0.824582	0.688255	0.68923	0.66368	0.663937	0.962614	0.962098
0.0008	0.724944	0.596347	0.002	0.580757	0.582735	0.823955	0.822745	0.68787	0.688087	0.661962	0.661962	0.964692	0.964692
0.0012	0.723539	0.595882	0.003	0.578529	0.582533	0.822871	0.821636	0.687826	0.687826	0.659722	0.660302	0.964337	0.968317
0.0016	0.721805	0.59528	0.004	0.577729	0.582121	0.823463	0.820486	0.687334	0.687737	0.658892	0.65903	0.961639	0.968499
0.002	0.719692	0.595383	0.005	0.578545	0.581646	0.822374	0.821232	0.686572	0.68726	0.657173	0.657637	0.955824	0.959504
0.0024	0.719196	0.595188	0.006	0.578749	0.580941	0.821318	0.821155	0.685849	0.686378	0.656097	0.656182	0.953244	0.958631
0.0028	0.718203	0.595221	0.007	0.578553	0.580482	0.821295	0.822523	0.685532	0.686191	0.654993	0.653815	0.950829	0.959612
0.0032	0.71812	0.594987	0.008	0.577827	0.57977	0.821012	0.82136	0.685031	0.685984	0.653562	0.651442	0.948706	0.958509
0.0036	0.717597	0.595231	0.009	0.577122	0.579289	0.820457	0.821171	0.684517	0.685809	0.652023	0.6503	0.946804	0.957897
0.004	0.717582	0.594889	0.01	0.57734	0.578331	0.820897	0.821906	0.685094	0.686022	0.651319	0.649491	0.945785	0.956781
0.0044	0.717568	0.593897	0.011	0.575683	0.577903	0.820628	0.821908	0.68497	0.685364	0.65076	0.64778	0.943968	0.957785
0.0048	0.719919	0.593682	0.012	0.575197	0.577351	0.819206	0.821419	0.684172	0.685201	0.649488	0.646881	0.943048	0.957075
0.0052	0.719656	0.592783	0.013	0.575345	0.576872	0.819666	0.821845	0.6843	0.684392	0.648879	0.64623	0.941907	0.957486
0.0056	0.719895	0.592473	0.014	0.574888	0.576257	0.818735	0.821718	0.682656	0.684413	0.648151	0.645043	0.941406	0.958641
0.006	0.719632	0.591867	0.015	0.574505	0.575512	0.818114	0.821168	0.681981	0.684192	0.647731	0.643975	0.940347	0.95857
0.0064	0.719842	0.592009	0.016	0.573694	0.575119	0.818333	0.8213	0.68192	0.684398	0.647239	0.642955	0.938814	0.957865
0.0068	0.719324	0.591966	0.017	0.572964	0.574587	0.818106	0.821514	0.681444	0.684066	0.646199	0.64216	0.93883	0.959082
0.0072	0.718759	0.59176	0.018	0.572497	0.574158	0.818097	0.821425	0.68027	0.6834	0.645121	0.641576	0.937334	0.958989
0.0076	0.718187	0.591443	0.019	0.572165	0.573397	0.817842	0.820818	0.680184	0.683356	0.644577	0.640869	0.936712	0.957155
0.008	0.718064	0.591419	0.02	0.571849	0.573036	0.817475	0.820637	0.680456	0.683151	0.643905	0.64049	0.936037	0.957891
0.0084	0.718193	0.590929	0.021	0.571316	0.572619	0.817119	0.820826	0.680003	0.682623	0.643287	0.640299	0.934942	0.958725
0.0088	0.717865	0.591051	0.022	0.570749	0.572628	0.817226	0.821138	0.679486	0.682754	0.642755	0.639718	0.933988	0.958332
0.0092	0.717529	0.590832	0.023	0.570564	0.572565	0.81743	0.821659	0.678821	0.682914	0.642323	0.639586	0.934179	0.95802
0.0096	0.717506	0.590044	0.024	0.570407	0.572538	0.817187	0.821529	0.679066	0.682381	0.641949	0.639386	0.934324	0.958538
0.01	0.717294	0.59	0.025	0.570002	0.572335	0.817216	0.821421	0.679108	0.681957	0.641451	0.639151	0.933399	0.958607
0.0104	0.716953	0.590064	0.026	0.569509	0.571993	0.816607	0.821055	0.678984	0.681893	0.640907	0.638798	0.932574	0.958251
0.0108	0.716439	0.590091	0.027	0.5691	0.571596	0.815576	0.820896	0.678627	0.682045	0.640296	0.638112	0.93208	0.958298
0.0112	0.7157	0.589737	0.028	0.56855	0.571456	0.815329	0.820894	0.678391	0.68198	0.639797	0.637688	0.931622	0.960379
0.0116	0.715672	0.589271	0.029	0.568307	0.571499	0.815311	0.820758	0.678603	0.681954	0.639607	0.637666	0.931339	0.961338
0.012	0.715138	0.589231	0.03	0.568335	0.571571	0.815057	0.821019	0.678584	0.681835	0.639428	0.637663	0.931333	0.960562
0.0124	0.715008	0.58933	0.031	0.568323	0.571558	0.8149	0.821538	0.678403	0.68173	0.639311	0.637422	0.931048	0.96044
0.0128	0.715176	0.589234	0.032	0.568537	0.57167	0.814841	0.821501	0.678187	0.681797	0.639236	0.636987	0.930747	0.960815
0.0132	0.714785	0.589378	0.033	0.568809	0.571509	0.814513	0.821124	0.678133	0.681806	0.639062	0.636659	0.930636	0.960969
0.0136	0.714448	0.589391	0.034	0.568664	0.571196	0.814209	0.820881	0.678118	0.681664	0.638933	0.636313	0.930525	0.961364
0.014	0.714525	0.589128	0.035	0.568364	0.570956	0.81393	0.820573	0.677901	0.681401	0.638768	0.635842	0.930425	0.96183
0.0144	0.714426	0.588689	0.036	0.567971	0.570727	0.814091	0.820299	0.677736	0.680962	0.638547	0.635339	0.930161	0.962078
0.0148	0.714139	0.588775	0.037	0.567545	0.570473	0.814136	0.820018	0.677487	0.68067	0.638178	0.635057	0.929463	0.961909
0.0152	0.713851	0.58871	0.038	0.567287	0.570106	0.813733	0.81977	0.676995	0.680728	0.637941	0.635045	0.92906	0.961191
0.0156	0.713314	0.588501	0.039	0.567074	0.569929	0.813473	0.819673	0.676573	0.680866	0.6379	0.635234	0.928755	0.960469
0.016	0.713049	0.588445	0.04	0.567195	0.569836	0.813406	0.81985	0.676253	0.68111	0.637899	0.635431	0.928676	0.959865
0.0164	0.713098	0.588359	0.041	0.567242	0.569822	0.813386	0.820124	0.676132	0.681285	0.637909	0.635602	0.92873	0.959583
0.0168	0.713221	0.588202	0.042	0.567263	0.569636	0.813261	0.820271	0.676202	0.681361	0.637935	0.635689	0.928964	0.959634
0.0172	0.713403	0.588205	0.043	0.567294	0.569455	0.813325	0.820318	0.676229	0.681292	0.63799	0.635708	0.929078	0.959629
0.0176	0.713402	0.58829	0.044	0.567091	0.569407	0.813648	0.820325	0.676304	0.680994	0.63798	0.635624	0.928976	0.959589
0.018	0.713128	0.587955	0.045	0.566748	0.569199	0.813876	0.820465	0.676192	0.680489	0.637804	0.635437	0.928809	0.959198
0.0184	0.712695	0.587547	0.046	0.566395	0.568877	0.814014	0.820791	0.67604	0.68005	0.637563	0.635258	0.928723	0.958793
0.0188	0.712338	0.587379	0.047	0.56604	0.568646	0.813937	0.821013	0.675826	0.679663	0.637297	0.635102	0.928561	0.958857
0.0192	0.712242	0.587285	0.048	0.565772	0.568546	0.813639	0.821045	0.675624	0.679602	0.637103	0.635018	0.928264	0.958877
0.0196	0.712194	0.587301	0.049	0.565697	0.568701	0.813351	0.821037	0.675531	0.67972	0.637025	0.635049	0.927934	0.958874
0.02	0.712223	0.587196	0.05	0.565701	0.568879	0.813157	0.820997	0.675549	0.679829	0.636996	0.635146	0.927575	0.958809
0.0204	0.712284	0.58705	0.051	0.565727	0.569029	0.813001	0.820983	0.675651	0.679874	0.636975	0.635245	0.92735	0.95845
0.0208	0.712056	0.587112	0.052	0.565853	0.569132	0.812991	0.820868	0.675673	0.679792	0.636947	0.635349	0.927247	0.958228
0.0212	0.711913	0.586996	0.053	0.565952	0.56914	0.813096	0.820603	0.675631	0.67971	0.63683	0.635347	0.927176	0.958048
0.0216	0.711912	0.586995	0.054	0.56601	0.569114	0.813155	0.820316	0.675574	0.679616	0.636599	0.635261	0.927186	0.957755
0.022	0.711734	0.586834	0.055	0.565976	0.569089	0.813132	0.820106	0.675531	0.679561	0.636337	0.635161	0.927105	0.95773
0.0224	0.711482	0.586501	0.056	0.565935	0.569029	0.812982	0.81997	0.675456	0.679504	0.636154	0.634996	0.926789	0.957789
0.0228	0.711307	0.586289	0.057	0.565899	0.569027	0.812787	0.820018	0.675484	0.679504	0.636055	0.634864	0.926516	0.957973
0.0232	0.711113	0.586102	0.058	0.565894	0.569027	0.812621	0.820123	0.675572	0.679498	0.636062	0.634803	0.926253	0.958004
0.0236	0.710824	0.585814	0.059	0.565899	0.569092	0.812529	0.820234	0.675609	0.679491	0.636141	0.634813	0.926073	0.958035
0.024	0.71094	0.585601	0.06	0.565863	0.569164	0.81256	0.82035	0.675586	0.679465	0.636257	0.634839	0.925995	0.957831
0.0244	0.710987	0.585471	0.061	0.565853	0.569218	0.812637	0.820409	0.675516	0.679399	0.636417	0.634889	0.926019	0.95768
0.0248	0.710907	0.585476	0.062	0.565851	0.569239	0.812702	0.820446	0.675406	0.679346	0.636579	0.634872	0.926244	0.957733
0.0252	0.710738	0.585348	0.063	0.565869	0.56915	0.812678	0.820408	0.675263	0.679248	0.63672	0.634839	0.926382	0.957718
0.0256	0.710525	0.585171	0.064	0.56589	0.568998	0.812628	0.820367	0.675121	0.679095	0.636777	0.634827	0.926446	0.957811
0.026	0.710437	0.584988	0.065	0.565792	0.568779	0.812568	0.820331	0.674963	0.679013	0.63678	0.63479	0.92641	0.958017
0.0264	0.710398	0.584871	0.066	0.565606	0.568592	0.812449	0.820229	0.674748	0.678907	0.63674	0.634715	0.926307	0.958188
0.0268	0.710298	0.584589	0.067	0.565377	0.56845	0.812417	0.820216	0.674537	0.678796	0.63665	0.634597	0.926229	0.958471
0.0272	0.710121	0.584369	0.068	0.565184	0.568384	0.81246	0.820268	0.674387	0.678726	0.636588	0.634521	0.926216	0.958691
0.0276	0.70989	0.584175	0.069	0.565049	0.568377	0.812549	0.820301	0.674258	0.678647	0.636567	0.634527	0.926322	0.958827
0.028	0.709693	0.584055	0.07	0.564977	0.568389	0.812628	0.820379	0.674182	0.678635	0.636556	0.634669	0.926574	0.959021
0.0284	0.709678	0.58399	0.071	0.564965	0.568368	0.81275	0.820485	0.674159	0.678668	0.636576	0.634842	0.926789	0.95921
0.0288	0.709632	0.584013	0.072	0.56493	0.568298	0.812884	0.820544	0.67415	0.678703	0.636545	0.634998	0.926965	0.959284
0.0292	0.709512	0.583987	0.073	0.564962	0.568221	0.812975	0.820492	0.674135	0.678708	0.636484	0.635097	0.927029	0.959383
0.0296	0.709409	0.584043	0.074	0.564973	0.568163	0.81303	0.820357	0.674081	0.678699	0.636359	0.635069	0.927002	0.95942
0.03	0.709176	0.584094	0.075	0.564989	0.568151	0.813047	0.820165	0.674062	0.678704	0.636233	0.635017	0.926868	0.959403
0.0304	0.709063	0.584099	0.076	0.56506	0.568183	0.813044	0.820009	0.67407	0.678717	0.636155	0.634896	0.926619	0.959425
0.0308	0.708913	0.584034	0.077	0.565116	0.568275	0.813095	0.820015	0.674141	0.678766	0.63613	0.634765	0.926357	0.959573
0.0312	0.708853	0.583941	0.078	0.56521	0.56839	0.813138	0.820063	0.674302	0.678772	0.636159	0.634646	0.926113	0.959805
0.0316	0.708756	0.58397	0.079	0.565296	0.568545	0.813139	0.820077	0.674488	0.678781	0.636173	0.634489	0.926019	0.959995
0.032	0.708572	0.583902	0.08	0.565381	0.568706	0.813127	0.820025	0.674675	0.678773	0.63616	0.634379	0.926005	0.960105
0.0324	0.708421	0.583847	0.081	0.565449	0.568847	0.812985	0.819897	0.674761	0.678706	0.636116	0.634283	0.926028	0.96016
0.0328	0.708272	0.583777	0.082	0.565501	0.56896	0.81281	0.819771	0.674785	0.678622	0.636093	0.634246	0.925956	0.960226
0.0332	0.708151	0.583773	0.083	0.565564	0.568999	0.812654	0.819659	0.674752	0.678566	0.63606	0.634211	0.925885	0.960253
0.0336	0.70795	0.583687	0.084	0.565652	0.568974	0.812523	0.819634	0.674668	0.678483	0.636025	0.634189	0.925754	0.960261
0.034	0.707861	0.583585	0.085	0.565707	0.568877	0.81243	0.81955	0.674544	0.67837	0.635997	0.634161	0.925552	0.960219
0.0344	0.707714	0.583424	0.086	0.565787	0.56874	0.81237	0.819476	0.674365	0.678273	0.63598	0.634109	0.925446	0.960104
0.0348	0.707605	0.583336	0.087	0.565841	0.568608	0.812332	0.819391	0.67418	0.67817	0.635954	0.634044	0.925387	0.960054
0.0352	0.707468	0.583272	0.088	0.565872	0.568464	0.812337	0.819234	0.673968	0.678134	0.63599	0.63401	0.925312	0.960004
0.0356	0.707275	0.583116	0.089	0.565868	0.568322	0.812412	0.819077	0.673823	0.678088	0.636079	0.634034	0.925328	0.959959
0.036	0.707081	0.582908	0.09	0.565913	0.56822	0.812522	0.818983	0.673725	0.678067	0.636189	0.634155	0.925468	0.95984
0.0364	0.706821	0.582747	0.091	0.5659	0.568093	0.812593	0.818951	0.673658	0.678053	0.63628	0.634263	0.925601	0.959665
0.0368	0.706573	0.582655	0.092	0.565891	0.567976	0.812649	0.818963	0.673616	0.67804	0.636359	0.634411	0.925706	0.95952
0.0372	0.706379	0.582584	0.093	0.565783	0.567835	0.812674	0.818972	0.673572	0.678013	0.636362	0.634499	0.925785	0.95931
0.0376	0.706228	0.582573	0.094	0.56562	0.567717	0.812659	0.818988	0.673525	0.677975	0.636346	0.634538	0.925809	0.959167
0.038	0.70612	0.582571	0.095	0.565493	0.567625	0.812645	0.819029	0.673465	0.677919	0.636314	0.63453	0.925887	0.959054
0.0384	0.706059	0.582683	0.096	0.565352	0.567627	0.812643	0.819153	0.673416	0.67789	0.636293	0.634549	0.925964	0.959072
0.0388	0.706052	0.5827	0.097	0.565249	0.56769	0.812693	0.819254	0.673455	0.677882	0.636267	0.634583	0.926033	0.959039
0.0392	0.706078	0.582759	0.098	0.56517	0.567761	0.812753	0.819381	0.673563	0.677921	0.636215	0.634686	0.926068	0.959026
0.0396	0.70613	0.582772	0.099	0.565097	0.56783	0.812747	0.819481	0.673727	0.677973	0.636182	0.634759	0.926053	0.958971
0.04	0.706286	0.58286	0.1	0.565	0.567904	0.812787	0.819563	0.673872	0.678032	0.636167	0.634746	0.926035	0.958953
0.0404	0.706481	0.583	0.101	0.564898	0.567962	0.812831	0.819623	0.673991	0.678049	0.636164	0.634701	0.926052	0.958921
0.0408	0.706651	0.583117	0.102	0.564862	0.568034	0.812813	0.819587	0.674088	0.678049	0.636185	0.634641	0.925985	0.958967
0.0412	0.706784	0.583215	0.103	0.564799	0.568133	0.812768	0.81957	0.674187	0.678028	0.636144	0.634555	0.925919	0.959096
0.0416	0.706938	0.583228	0.104	0.564825	0.568222	0.812688	0.81956	0.674297	0.678	0.636105	0.634431	0.92582	0.959212
0.042	0.707072	0.583286	0.105	0.564832	0.56833	0.812571	0.819564	0.674413	0.67798	0.635997	0.634271	0.925735	0.959388
0.0424	0.707197	0.583315	0.106	0.564857	0.56841	0.812476	0.819566	0.674499	0.677889	0.635899	0.634085	0.925694	0.959443
0.0428	0.707221	0.583286	0.107	0.564876	0.568462	0.812357	0.81957	0.674542	0.677787	0.635774	0.633932	0.925646	0.959436
0.0432	0.707282	0.583212	0.108	0.564967	0.568518	0.81227	0.819541	0.674597	0.677699	0.635712	0.633869	0.925593	0.959384
0.0436	0.707279	0.583136	0.109	0.565071	0.568613	0.812254	0.819393	0.674687	0.67767	0.635748	0.633871	0.925567	0.959344
0.044	0.7073	0.583044	0.11	0.565181	0.568647	0.812231	0.819301	0.674789	0.677667	0.635796	0.633926	0.925592	0.959382
0.0444	0.707196	0.582978	0.111	0.565263	0.568612	0.812228	0.819213	0.674831	0.677647	0.635891	0.633993	0.925639	0.959459
0.0448	0.707106	0.582928	0.112	0.565323	0.568506	0.812194	0.81915	0.674791	0.677623	0.63601	0.634004	0.925658	0.959508
0.0452	0.707003	0.582852	0.113	0.56534	0.568359	0.812121	0.819065	0.674728	0.677527	0.636092	0.633996	0.925624	0.959558
0.0456	0.706888	0.582786	0.114	0.56533	0.568216	0.812046	0.81896	0.67463	0.677439	0.636141	0.633975	0.925596	0.959523
0.046	0.706776	0.582721	0.115	0.565304	0.568046	0.811957	0.818819	0.674502	0.677368	0.636172	0.633952	0.925549	0.959419
0.0464	0.706643	0.582656	0.116	0.565286	0.567896	0.811955	0.818703	0.674342	0.677321	0.636192	0.633918	0.925594	0.959355
0.0468	0.706524	0.582605	0.117	0.565284	0.567782	0.811977	0.818671	0.674187	0.677308	0.636157	0.63393	0.925699	0.959362
0.0472	0.706471	0.582524	0.118	0.565248	0.567717	0.812013	0.818699	0.67406	0.677287	0.636142	0.634003	0.925805	0.959468
0.0476	0.706431	0.582434	0.119	0.565207	0.567717	0.812043	0.818772	0.673971	0.677283	0.636144	0.634188	0.925968	0.959636
0.048	0.706384	0.582358	0.12	0.565139	0.567749	0.812108	0.818876	0.673967	0.677267	0.636163	0.634408	0.926095	0.959802
0.0484	0.7064	0.582349	0.121	0.565034	0.567751	0.812196	0.818977	0.67399	0.677251	0.636208	0.634575	0.926156	0.959889
0.0488	0.706432	0.582298	0.122	0.564898	0.567755	0.81228	0.819048	0.674018	0.677227	0.636286	0.634704	0.926137	0.959898
0.0492	0.706451	0.582274	0.123	0.564798	0.567796	0.812402	0.819121	0.67406	0.677193	0.636331	0.634744	0.926141	0.959878
0.0496	0.706473	0.582265	0.124	0.564688	0.567847	0.812484	0.819217	0.674084	0.677156	0.636339	0.634726	0.926078	0.959808
0.05	0.706507	0.582273	0.125	0.564646	0.567911	0.812562	0.819268	0.674086	0.677148	0.63628	0.634703	0.925951	0.95975
0.0504	0.706567	0.58231	0.126	0.564623	0.567993	0.812611	0.819271	0.674127	0.677166	0.636176	0.634643	0.925828	0.959724
0.0508	0.706579	0.582355	0.127	0.564625	0.568084	0.812629	0.819294	0.674188	0.677196	0.636049	0.634535	0.925745	0.959749
0.0512	0.706699	0.582329	0.128	0.564626	0.568203	0.812636	0.819305	0.674245	0.6772	0.63594	0.634457	0.925685	0.959792
0.0516	0.706743	0.582335	0.129	0.56467	0.568371	0.812698	0.81932	0.674343	0.67721	0.635859	0.634364	0.925732	0.959816
0.052	0.706775	0.582308	0.13	0.564773	0.568538	0.812781	0.819303	0.674491	0.677188	0.635834	0.634321	0.925775	0.959752
0.0524	0.706835	0.582226	0.131	0.564895	0.568658	0.812828	0.819245	0.674642	0.677199	0.635832	0.634291	0.92583	0.959597
0.0528	0.706939	0.582137	0.132	0.565042	0.568701	0.812768	0.819143	0.674757	0.677152	0.635837	0.63424	0.925783	0.959386
0.0532	0.706973	0.582063	0.133	0.565137	0.568672	0.812647	0.819017	0.674802	0.677074	0.635826	0.634136	0.925714	0.959225
0.0536	0.706971	0.58201	0.134	0.565233	0.568614	0.812493	0.818887	0.674788	0.676964	0.635775	0.633988	0.925698	0.959123
0.054	0.70697	0.58193	0.135	0.565318	0.568611	0.812405	0.818761	0.674781	0.676863	0.635736	0.633888	0.92571	0.959062
0.0544	0.706941	0.581813	0.136	0.565426	0.568636	0.812379	0.818714	0.674753	0.676819	0.635745	0.633842	0.925699	0.959073
0.0548	0.706854	0.581702	0.137	0.565566	0.568612	0.812393	0.818754	0.674729	0.676826	0.635831	0.633829	0.925693	0.959091
0.0552	0.706759	0.581587	0.138	0.565661	0.568545	0.812421	0.818767	0.674676	0.676848	0.635949	0.633817	0.925676	0.959073
0.0556	0.706695	0.581481	0.139	0.565692	0.568437	0.812454	0.81877	0.674611	0.676856	0.636101	0.633862	0.925734	0.95898
0.056	0.70666	0.581444	0.14	0.565675	0.568351	0.812505	0.818718	0.674552	0.676833	0.636215	0.633916	0.92579	0.958865
0.0564	0.706638	0.581384	0.141	0.565614	0.568246	0.812536	0.818624	0.674449	0.676802	0.636273	0.633975	0.925822	0.958713
0.0568	0.706551	0.581317	0.142	0.565529	0.56815	0.812569	0.818503	0.674337	0.676777	0.63631	0.634049	0.925836	0.95858
0.0572	0.706523	0.581265	0.143	0.5654	0.568028	0.812579	0.818468	0.674259	0.67677	0.636297	0.634133	0.925834	0.958517
0.0576	0.7065	0.581245	0.144	0.565282	0.567963	0.812544	0.818574	0.674168	0.676744	0.636293	0.634212	0.925812	0.958508
0.058	0.706495	0.581208	0.145	0.565156	0.567904	0.812538	0.818707	0.67412	0.676703	0.636265	0.634308	0.925819	0.958546
0.0584	0.706494	0.581242	0.146	0.565052	0.567885	0.81257	0.818848	0.674063	0.676672	0.636227	0.634423	0.925771	0.958602
0.0588	0.706519	0.581256	0.147	0.56496	0.567976	0.812675	0.818924	0.674024	0.676651	0.636193	0.634523	0.925677	0.958629
0.0592	0.706538	0.581249	0.148	0.564867	0.568068	0.812767	0.818951	0.673981	0.67667	0.636168	0.634627	0.925523	0.958643
0.0596	0.706581	0.58128	0.149	0.564816	0.568191	0.812843	0.818955	0.673959	0.676695	0.636176	0.634716	0.925388	0.958648
0.06	0.706601	0.581287	0.15	0.56479	0.568302	0.81289	0.819003	0.673943	0.676731	0.636165	0.634739	0.92528	0.95867
0.0604	0.706665	0.581311	0.151	0.564789	0.568354	0.812943	0.819067	0.673971	0.676746	0.636088	0.634708	0.925222	0.958728
0.0608	0.706645	0.581324	0.152	0.564793	0.568423	0.812938	0.819067	0.673997	0.676768	0.635973	0.634634	0.925182	0.958774
0.0612	0.706594	0.581354	0.153	0.564843	0.568493	0.812891	0.819103	0.674032	0.676802	0.635846	0.634501	0.925134	0.958874
0.0616	0.706562	0.581365	0.154	0.564889	0.568602	0.81284	0.819108	0.674069	0.676838	0.635726	0.634357	0.925074	0.958955
0.062	0.706508	0.581365	0.155	0.564969	0.568725	0.812767	0.819064	0.674109	0.676874	0.63568	0.634181	0.924998	0.958967
0.0624	0.706444	0.581334	0.156	0.565083	0.568887	0.812738	0.818998	0.674162	0.676849	0.63569	0.634005	0.924979	0.958898
0.0628	0.706332	0.581322	0.157	0.565175	0.568992	0.812697	0.818949	0.674258	0.676819	0.635732	0.633866	0.925006	0.958786
0.0632	0.706261	0.58133	0.158	0.565273	0.569055	0.812635	0.818901	0.674376	0.676752	0.635761	0.633803	0.925015	0.9587
0.0636	0.706153	0.581294	0.159	0.565362	0.569088	0.812553	0.818829	0.674464	0.676693	0.635795	0.633778	0.925034	0.958605
0.064	0.706052	0.581234	0.16	0.56542	0.569048	0.812433	0.818732	0.674492	0.676657	0.635755	0.633727	0.92506	0.958566
0.0644	0.705967	0.581188	0.161	0.565448	0.568985	0.812331	0.818619	0.674443	0.676593	0.635773	0.633662	0.92511	0.958514
0.0648	0.705862	0.581136	0.162	0.565473	0.568912	0.812226	0.818463	0.674346	0.676548	0.635813	0.633613	0.925195	0.958494
0.0652	0.705739	0.581092	0.163	0.565532	0.568856	0.812149	0.818387	0.674234	0.676517	0.63588	0.633599	0.925297	0.958475
0.0656	0.70568	0.581052	0.164	0.565589	0.56883	0.812093	0.818306	0.674151	0.676515	0.635979	0.633615	0.925382	0.958452
0.066	0.705577	0.581041	0.165	0.565651	0.568806	0.812027	0.818245	0.674049	0.676542	0.636099	0.633644	0.925407	0.958375
0.0664	0.705562	0.58102	0.166	0.565668	0.568757	0.812017	0.818229	0.673983	0.676539	0.636189	0.633676	0.925412	0.958311
0.0668	0.705508	0.581033	0.167	0.565619	0.568666	0.81202	0.818225	0.673922	0.67655	0.636223	0.6337	0.925435	0.95823
0.0672	0.705496	0.581055	0.168	0.565543	0.568539	0.812077	0.818227	0.673879	0.676529	0.636243	0.633778	0.925524	0.95822
0.0676	0.705524	0.581067	0.169	0.565471	0.568445	0.812157	0.818221	0.673782	0.676519	0.636248	0.633877	0.92559	0.958252
0.068	0.705571	0.581094	0.17	0.565383	0.568372	0.81224	0.818268	0.673688	0.676496	0.636247	0.634018	0.925646	0.958345
0.0684	0.705663	0.581165	0.171	0.565302	0.568291	0.812321	0.818332	0.673616	0.676505	0.636221	0.634135	0.925655	0.958397
0.0688	0.705731	0.581241	0.172	0.565156	0.568227	0.812375	0.818437	0.673574	0.676524	0.636213	0.63426	0.925602	0.958418
0.0692	0.705777	0.581269	0.173	0.56504	0.568208	0.812455	0.818563	0.673563	0.676553	0.636216	0.6343	0.925516	0.95841
0.0696	0.705871	0.581334	0.174	0.564927	0.568218	0.812539	0.818671	0.673578	0.676579	0.636186	0.634285	0.92539	0.958374
0.07	0.705979	0.581383	0.175	0.564911	0.568274	0.812613	0.81875	0.673652	0.676604	0.636205	0.634247	0.925224	0.958363
0.0704	0.706058	0.581438	0.176	0.564943	0.568356	0.812669	0.818817	0.673796	0.676644	0.636219	0.634191	0.92508	0.958376
0.0708	0.706116	0.581461	0.177	0.564983	0.568448	0.812716	0.818878	0.67396	0.676672	0.636186	0.634126	0.925	0.958412
0.0712	0.706187	0.581464	0.178	0.565021	0.568494	0.812736	0.818919	0.674125	0.676643	0.636112	0.634054	0.924942	0.95842
0.0716	0.706237	0.58145	0.179	0.565033	0.568543	0.81272	0.818917	0.6742	0.676588	0.636003	0.633941	0.924953	0.958426
0.072	0.706275	0.581479	0.18	0.565038	0.56859	0.812681	0.818876	0.674262	0.676475	0.635889	0.633819	0.924948	0.958407
0.0724	0.706283	0.581478	0.181	0.565046	0.568636	0.812559	0.818804	0.674285	0.676404	0.635789	0.633714	0.924939	0.958385
0.0728	0.70628	0.581443	0.182	0.565114	0.568705	0.81243	0.818708	0.674302	0.676356	0.635746	0.633625	0.924921	0.958351
0.0732	0.706278	0.581433	0.183	0.565194	0.568831	0.812364	0.818627	0.674328	0.676344	0.635746	0.633562	0.924926	0.958304
0.0736	0.706233	0.581417	0.184	0.565278	0.568913	0.81234	0.818617	0.674381	0.676322	0.635755	0.633473	0.924929	0.958267
0.074	0.706177	0.581374	0.185	0.565377	0.569004	0.812341	0.818544	0.674409	0.676282	0.635782	0.633424	0.924976	0.958246
0.0744	0.7061	0.581357	0.186	0.565511	0.569025	0.812338	0.818447	0.67438	0.676265	0.63581	0.633398	0.925041	0.958247
0.0748	0.706061	0.581341	0.187	0.565609	0.568978	0.8123	0.818353	0.674299	0.676226	0.635814	0.633423	0.925068	0.95823
0.0752	0.70604	0.581333	0.188	0.565676	0.568879	0.812256	0.818192	0.674192	0.676203	0.635841	0.633444	0.925108	0.958195
0.0756	0.70603	0.58129	0.189	0.565683	0.568757	0.812204	0.818079	0.674071	0.676194	0.635911	0.633497	0.925125	0.958109
0.076	0.706003	0.581286	0.19	0.565619	0.568645	0.812154	0.818022	0.673971	0.676176	0.635992	0.633559	0.925201	0.958002
0.0764	0.705953	0.581258	0.191	0.565563	0.568497	0.812126	0.818022	0.673875	0.676157	0.636076	0.633614	0.92523	0.957899
0.0768	0.705958	0.581219	0.192	0.565513	0.568378	0.812102	0.818034	0.673791	0.676158	0.636155	0.633677	0.925229	0.957831
0.0772	0.705959	0.581166	0.193	0.565472	0.568303	0.812108	0.818082	0.673753	0.676196	0.636188	0.633766	0.925212	0.95783
0.0776	0.705941	0.581155	0.194	0.565387	0.568308	0.812136	0.818106	0.673752	0.676228	0.636228	0.633849	0.925187	0.957846
0.078	0.705906	0.581123	0.195	0.565286	0.568291	0.812197	0.818114	0.67374	0.676248	0.636283	0.633941	0.925189	0.957888
0.0784	0.705875	0.581099	0.196	0.565175	0.568302	0.812267	0.818147	0.673737	0.676262	0.636347	0.63401	0.925175	0.957955
0.0788	0.705877	0.581039	0.197	0.565097	0.568279	0.812364	0.818177	0.673757	0.676248	0.636353	0.634069	0.925184	0.958023
0.0792	0.705847	0.581039	0.198	0.564996	0.568264	0.81242	0.818249	0.673751	0.676247	0.636298	0.634096	0.925157	0.958059
0.0796	0.705825	0.581014	0.199	0.564932	0.568266	0.812452	0.818294	0.67375	0.67625	0.636226	0.63408	0.925053	0.958052
0.08	0.705815	0.581029	0.2	0.564866	0.568312	0.81247	0.818368	0.673734	0.676243	0.636101	0.633996	0.924971	0.958048
0.0804	0.705821	0.581021	0.201	0.56476	0.568321	0.812455	0.818449	0.67373	0.67622	0.635944	0.633897	0.924935	0.958054
0.0808	0.7058	0.581005	0.202	0.56471	0.568398	0.812455	0.818515	0.673751	0.676185	0.63581	0.63379	0.924969	0.958087
0.0812	0.705783	0.581005	0.203	0.564694	0.568495	0.812449	0.81857	0.673825	0.676173	0.635732	0.633713	0.925023	0.958149
0.0816	0.705733	0.580995	0.204	0.564718	0.568596	0.812447	0.818596	0.673924	0.676189	0.635658	0.633632	0.925074	0.958188
0.082	0.705705	0.580948	0.205	0.56478	0.568674	0.812421	0.818584	0.673989	0.676214	0.6356	0.633539	0.925095	0.958212
0.0824	0.705668	0.580961	0.206	0.564822	0.56876	0.812379	0.818579	0.674046	0.676202	0.635577	0.633464	0.925119	0.958189
0.0828	0.705656	0.580974	0.207	0.564837	0.568818	0.812315	0.818532	0.674093	0.676167	0.635517	0.633383	0.925128	0.958138
0.0832	0.705571	0.580948	0.208	0.564829	0.568889	0.81226	0.81844	0.674124	0.676108	0.635465	0.633328	0.925142	0.958066
0.0836	0.705541	0.580936	0.209	0.56485	0.568914	0.812213	0.81832	0.674174	0.676077	0.635424	0.633284	0.925119	0.958007
0.084	0.705487	0.58095	0.21	0.564932	0.568913	0.812146	0.818238	0.674206	0.676082	0.635408	0.633183	0.925082	0.958017
0.0844	0.705443	0.580942	0.211	0.565056	0.568863	0.812078	0.818157	0.674235	0.676095	0.635442	0.63311	0.925084	0.958049
0.0848	0.705388	0.580916	0.212	0.565198	0.568782	0.81203	0.818067	0.674217	0.676088	0.635505	0.633044	0.925112	0.95808
0.0852	0.705339	0.580889	0.213	0.565328	0.56871	0.812025	0.817994	0.674175	0.676072	0.635606	0.633009	0.925182	0.958081
0.0856	0.70527	0.580884	0.214	0.565429	0.568651	0.812031	0.817888	0.674145	0.67607	0.63569	0.633019	0.925213	0.958044
0.086	0.705208	0.58086	0.215	0.565509	0.568587	0.812066	0.817795	0.674125	0.676069	0.63579	0.633074	0.925202	0.957953
0.0864	0.705205	0.580833	0.216	0.565536	0.5685	0.812098	0.817735	0.6741	0.676075	0.635917	0.633181	0.925205	0.957846
0.0868	0.705143	0.580839	0.217	0.565518	0.568365	0.812116	0.817772	0.674033	0.676086	0.635962	0.633268	0.925226	0.95777
0.0872	0.705134	0.580842	0.218	0.565448	0.568224	0.812126	0.817839	0.673944	0.676088	0.635973	0.63337	0.925215	0.957726
0.0876	0.70516	0.58087	0.219	0.565302	0.568096	0.812149	0.817899	0.673864	0.676096	0.635959	0.633445	0.925186	0.957755
0.088	0.705165	0.58087	0.22	0.565178	0.567991	0.812154	0.817966	0.673813	0.676115	0.635931	0.633502	0.925089	0.957834
0.0884	0.705178	0.580903	0.221	0.56509	0.567923	0.812158	0.817963	0.673763	0.676125	0.635942	0.633547	0.925012	0.957885
0.0888	0.705198	0.580916	0.222	0.565021	0.567872	0.812157	0.817971	0.673682	0.676138	0.635949	0.633596	0.924906	0.957893
0.0892	0.705249	0.580966	0.223	0.564933	0.567886	0.812185	0.818033	0.67361	0.676138	0.635952	0.633645	0.924842	0.957866
0.0896	0.70529	0.581002	0.224	0.564822	0.567928	0.812266	0.818132	0.673557	0.676131	0.635941	0.633669	0.924793	0.957833
0.09	0.705335	0.581079	0.225	0.564717	0.567979	0.812348	0.818271	0.673546	0.676121	0.635949	0.63369	0.924773	0.95776
0.0904	0.705391	0.581108	0.226	0.564615	0.568018	0.812425	0.81836	0.673559	0.676118	0.635931	0.63366	0.924736	0.957737
0.0908	0.705442	0.581193	0.227	0.564574	0.56801	0.812477	0.818474	0.673536	0.676117	0.635863	0.633591	0.924739	0.957765
0.0912	0.705465	0.581242	0.228	0.564544	0.568007	0.812471	0.818489	0.673515	0.676089	0.635769	0.633535	0.924756	0.957815
0.0916	0.70555	0.581261	0.229	0.564549	0.568073	0.812418	0.818461	0.673535	0.676084	0.635664	0.633458	0.92485	0.957909
0.092	0.705595	0.581323	0.23	0.564573	0.568207	0.812319	0.818443	0.673637	0.676044	0.635555	0.633348	0.924944	0.957969
0.0924	0.705645	0.581351	0.231	0.564654	0.568351	0.812222	0.818378	0.673766	0.676005	0.635438	0.63326	0.925004	0.957968
0.0928	0.705726	0.581411	0.232	0.564817	0.568488	0.812144	0.818272	0.673875	0.675956	0.63538	0.633177	0.924993	0.957906
0.0932	0.705782	0.581439	0.233	0.56499	0.568612	0.812101	0.818167	0.673942	0.675908	0.635359	0.633115	0.924961	0.957905
0.0936	0.70585	0.581444	0.234	0.565103	0.568656	0.81204	0.818086	0.673972	0.675879	0.635365	0.633056	0.924993	0.95791
0.094	0.705904	0.581467	0.235	0.565208	0.568709	0.811988	0.817972	0.673978	0.675866	0.635427	0.633021	0.925054	0.957948
0.0944	0.705943	0.581492	0.236	0.565278	0.568718	0.81196	0.817874	0.673932	0.675886	0.635501	0.632983	0.925136	0.957999
0.0948	0.705945	0.581488	0.237	0.56534	0.568712	0.811946	0.817775	0.673897	0.67589	0.635551	0.632934	0.925213	0.958037
0.0952	0.706003	0.581472	0.238	0.565377	0.568677	0.811955	0.817668	0.673846	0.675935	0.635564	0.632893	0.92527	0.958043
0.0956	0.706034	0.581436	0.239	0.565396	0.56861	0.811949	0.817619	0.673793	0.675941	0.635593	0.632879	0.9253	0.957983
0.096	0.70607	0.581436	0.24	0.565369	0.568541	0.811959	0.817579	0.673743	0.675957	0.63561	0.632894	0.92532	0.957896
0.0964	0.706125	0.581423	0.241	0.565356	0.568465	0.811927	0.817582	0.67373	0.675937	0.635649	0.632944	0.925298	0.957762
0.0968	0.706154	0.581421	0.242	0.565356	0.568397	0.811899	0.81757	0.673694	0.675923	0.635762	0.633045	0.92526	0.957639
0.0972	0.706198	0.581386	0.243	0.565322	0.568301	0.81188	0.817565	0.673616	0.675886	0.63587	0.633163	0.925228	0.95754
0.0976	0.706209	0.581364	0.244	0.56525	0.568198	0.811863	0.817603	0.673546	0.675835	0.635942	0.633285	0.925175	0.957504
0.098	0.706272	0.581342	0.245	0.56513	0.568087	0.811862	0.81766	0.673433	0.675814	0.635983	0.633379	0.925152	0.957498
0.0984	0.706316	0.581328	0.246	0.564986	0.567992	0.811883	0.817755	0.673366	0.675795	0.636006	0.633455	0.92514	0.957512
0.0988	0.706359	0.581275	0.247	0.564879	0.567928	0.811928	0.817845	0.673315	0.675815	0.635989	0.633477	0.925099	0.957515
0.0992	0.706367	0.58126	0.248	0.564759	0.567883	0.811986	0.8179	0.673338	0.675845	0.63592	0.633487	0.92505	0.957505
0.0996	0.706353	0.581222	0.249	0.564704	0.567881	0.812059	0.817979	0.673365	0.675868	0.635842	0.633512	0.925008	0.957492
0.1	0.706382	0.581197	0.25	0.564668	0.567898	0.812122	0.81806	0.673364	0.675877	0.635721	0.633482	0.924977	0.957477
0.1004	0.706343	0.581142	0.251	0.564631	0.567923	0.812194	0.818201	0.673353	0.675872	0.635605	0.63346	0.924951	0.957484
0.1008	0.70632	0.581096	0.252	0.564655	0.568009	0.812247	0.818309	0.673342	0.675828	0.635499	0.633437	0.924947	0.957563
0.1012	0.706301	0.581047	0.253	0.564702	0.568127	0.812266	0.818395	0.673356	0.675818	0.635424	0.633398	0.924952	0.957652
0.1016	0.706289	0.581014	0.254	0.564753	0.568271	0.812305	0.818448	0.673419	0.6758	0.635355	0.633356	0.924948	0.957741
0.102	0.706233	0.581005	0.255	0.564784	0.568401	0.812301	0.818445	0.673476	0.675807	0.6353	0.633271	0.924959	0.957782
0.1024	0.706208	0.580954	0.256	0.564817	0.568518	0.812286	0.818401	0.673539	0.675791	0.635272	0.633185	0.92495	0.957768
0.1028	0.706179	0.580907	0.257	0.564814	0.568608	0.812292	0.818328	0.67358	0.675759	0.635211	0.633066	0.924934	0.957703
0.1032	0.706188	0.580878	0.258	0.564858	0.568687	0.812306	0.818217	0.673673	0.675724	0.635177	0.632963	0.924921	0.957638
0.1036	0.706126	0.580875	0.259	0.564953	0.568745	0.81231	0.818053	0.673767	0.675713	0.635179	0.632924	0.924901	0.957607
0.104	0.706098	0.580875	0.26	0.565079	0.568751	0.812303	0.817936	0.673871	0.675719	0.635189	0.632905	0.924876	0.957607
0.1044	0.706077	0.580842	0.261	0.565194	0.568726	0.812256	0.817866	0.673924	0.675717	0.635251	0.632886	0.924901	0.957647
0.1048	0.706056	0.580801	0.262	0.565305	0.568674	0.812169	0.817794	0.673899	0.675711	0.63533	0.632862	0.924916	0.957675
0.1052	0.706044	0.580751	0.263	0.565419	0.568631	0.812101	0.817739	0.673854	0.675702	0.635442	0.632825	0.924932	0.957672
0.1056	0.706014	0.580734	0.264	0.565486	0.568602	0.812066	0.817627	0.673808	0.675709	0.635532	0.632803	0.924935	0.957624
0.106	0.705962	0.580718	0.265	0.565487	0.568549	0.812007	0.81749	0.673754	0.675716	0.635625	0.632791	0.924851	0.957534
0.1064	0.705937	0.580671	0.266	0.565419	0.568518	0.811993	0.817407	0.673725	0.675709	0.635707	0.632836	0.924833	0.957437
0.1068	0.705907	0.580618	0.267	0.565335	0.568439	0.811948	0.817396	0.673647	0.67565	0.635758	0.632887	0.924809	0.957355
0.1072	0.705818	0.580582	0.268	0.565219	0.568329	0.811971	0.817429	0.67356	0.675571	0.635829	0.633009	0.924866	0.957356
0.1076	0.705747	0.580562	0.269	0.565117	0.568218	0.811994	0.817463	0.673437	0.675523	0.63585	0.633119	0.924968	0.957391
0.108	0.705692	0.580531	0.27	0.565	0.568081	0.812021	0.817521	0.673333	0.675524	0.635878	0.633254	0.924999	0.957491
0.1084	0.705655	0.580564	0.271	0.564918	0.56792	0.812024	0.817548	0.673249	0.675562	0.635906	0.633357	0.925052	0.95757
0.1088	0.705584	0.580572	0.272	0.564816	0.567799	0.812024	0.817599	0.673189	0.675593	0.635913	0.633403	0.925044	0.957602
0.1092	0.705542	0.580616	0.273	0.564744	0.567765	0.812025	0.817674	0.673122	0.67561	0.635905	0.633408	0.925036	0.957618
0.1096	0.705473	0.580677	0.274	0.564666	0.567763	0.812064	0.817769	0.673088	0.675639	0.635829	0.633389	0.924974	0.957597
0.11	0.705475	0.580729	0.275	0.564592	0.567857	0.812136	0.81787	0.673114	0.675674	0.63574	0.633361	0.924937	0.957535
0.1104	0.705448	0.580774	0.276	0.564564	0.567981	0.812205	0.817965	0.673164	0.67571	0.635632	0.633356	0.924936	0.957488
0.1108	0.705422	0.580831	0.277	0.564552	0.568079	0.812276	0.818103	0.673273	0.675718	0.635523	0.633321	0.924957	0.957486
0.1112	0.705404	0.580863	0.278	0.56459	0.568163	0.812333	0.818211	0.673381	0.675683	0.635432	0.63326	0.924995	0.957518
0.1116	0.705398	0.5809	0.279	0.564636	0.568232	0.81233	0.818272	0.673466	0.675636	0.635367	0.633178	0.925028	0.957629
0.112	0.705414	0.580932	0.28	0.564678	0.568303	0.812328	0.818274	0.673561	0.675585	0.635302	0.633079	0.925026	0.957707
0.1124	0.705372	0.580958	0.281	0.564718	0.568384	0.812257	0.818196	0.673624	0.675555	0.635254	0.63297	0.924986	0.957743
0.1128	0.705366	0.581011	0.282	0.564793	0.568492	0.812182	0.818083	0.673714	0.675537	0.635258	0.63284	0.924899	0.957692
0.1132	0.705291	0.581015	0.283	0.564905	0.56861	0.812128	0.817948	0.673835	0.675541	0.635278	0.632711	0.92479	0.957638
0.1136	0.705288	0.581054	0.284	0.565042	0.568714	0.812072	0.817853	0.673911	0.675543	0.635294	0.632593	0.924707	0.957559
0.114	0.705275	0.581084	0.285	0.565153	0.568786	0.81206	0.817742	0.673961	0.675542	0.635302	0.632525	0.924697	0.957514
0.1144	0.70525	0.581115	0.286	0.565233	0.568798	0.812063	0.817665	0.673934	0.675574	0.635292	0.632486	0.92476	0.957508
0.1148	0.705223	0.581164	0.287	0.565277	0.568795	0.81206	0.817581	0.673932	0.675569	0.635298	0.632479	0.924843	0.957541
0.1152	0.705222	0.581206	0.288	0.565317	0.568757	0.812032	0.817498	0.67387	0.675573	0.635306	0.632428	0.924908	0.957555
0.1156	0.705216	0.581234	0.289	0.565383	0.568661	0.811992	0.817481	0.673818	0.675568	0.635367	0.632426	0.924915	0.957533
0.116	0.705231	0.581293	0.29	0.565392	0.568548	0.811978	0.817481	0.673763	0.67555	0.63544	0.632452	0.924904	0.957476
0.1164	0.705215	0.58133	0.291	0.565354	0.568389	0.811921	0.817519	0.673711	0.675539	0.635515	0.632489	0.924825	0.957373
0.1168	0.70522	0.581368	0.292	0.565249	0.568305	0.8119	0.817488	0.673636	0.675536	0.635613	0.632551	0.924738	0.957274
0.1172	0.705194	0.581386	0.293	0.565175	0.568229	0.811875	0.817449	0.67354	0.675565	0.635689	0.632603	0.924679	0.95721
0.1176	0.705235	0.581427	0.294	0.565086	0.568148	0.811853	0.817445	0.673449	0.67558	0.635748	0.632689	0.92466	0.957193
0.118	0.705204	0.581454	0.295	0.565036	0.56804	0.811871	0.817393	0.673345	0.675576	0.635772	0.632788	0.924728	0.957194
0.1184	0.705197	0.581506	0.296	0.564937	0.567933	0.811898	0.817392	0.673261	0.675573	0.635795	0.632908	0.924873	0.957214
0.1188	0.70516	0.581528	0.297	0.564852	0.56787	0.811957	0.817397	0.673253	0.675563	0.635776	0.632977	0.924974	0.95726
0.1192	0.705147	0.581566	0.298	0.564747	0.567841	0.812012	0.817462	0.673272	0.675583	0.635727	0.633008	0.925002	0.95728
0.1196	0.705155	0.581627	0.299	0.564704	0.567815	0.812043	0.817536	0.673318	0.675598	0.635678	0.633014	0.924979	0.957258
0.12	0.705151	0.581663	0.3	0.564664	0.567822	0.812099	0.817697	0.673385	0.675614	0.635578	0.632978	0.924896	0.957224
0.1204	0.705175	0.581742	0.301	0.564609	0.567824	0.812124	0.817867	0.673415	0.675618	0.63546	0.632937	0.924853	0.957142
0.1208	0.705194	0.581771	0.302	0.564585	0.567917	0.812158	0.817948	0.673429	0.675591	0.635323	0.632917	0.924828	0.957139
0.1212	0.705216	0.581803	0.303	0.564573	0.568058	0.812186	0.818017	0.673432	0.675563	0.635205	0.632908	0.924838	0.957233
0.1216	0.705243	0.581829	0.304	0.564601	0.568208	0.812252	0.818047	0.673461	0.675514	0.635123	0.632905	0.924853	0.957353
0.122	0.705261	0.581859	0.305	0.564644	0.568302	0.812281	0.818027	0.673511	0.675499	0.635092	0.632919	0.924859	0.957466
0.1224	0.705343	0.581854	0.306	0.564674	0.568363	0.812283	0.817995	0.673617	0.675481	0.635107	0.632901	0.924872	0.957524
0.1228	0.705339	0.581854	0.307	0.564674	0.568433	0.812215	0.817934	0.673707	0.675488	0.635123	0.632832	0.924865	0.957524
0.1232	0.705363	0.581865	0.308	0.56471	0.568478	0.812111	0.817873	0.673799	0.67549	0.635162	0.632731	0.924774	0.957552
0.1236	0.705385	0.581861	0.309	0.564792	0.568574	0.812029	0.817771	0.673834	0.675528	0.635203	0.632618	0.924675	0.95751
0.124	0.705385	0.5818	0.31	0.56488	0.568641	0.812	0.817721	0.673867	0.675559	0.635217	0.632526	0.924591	0.95749
0.1244	0.705383	0.581811	0.311	0.56496	0.56865	0.811981	0.817653	0.673906	0.675569	0.635232	0.632443	0.924566	0.957464
0.1248	0.705366	0.58176	0.312	0.565034	0.568597	0.811959	0.81757	0.673914	0.675582	0.635248	0.632388	0.924613	0.957476
0.1252	0.705321	0.581765	0.313	0.565093	0.56852	0.811914	0.8175	0.673942	0.675555	0.63528	0.632362	0.924699	0.957465
0.1256	0.705312	0.581726	0.314	0.565172	0.568423	0.811896	0.817425	0.67395	0.675506	0.635327	0.632358	0.924791	0.957459
0.126	0.705295	0.581699	0.315	0.565232	0.568327	0.811845	0.817347	0.673909	0.675462	0.635431	0.632377	0.924796	0.957364
0.1264	0.705286	0.581659	0.316	0.565269	0.568231	0.811828	0.8173	0.673859	0.675432	0.635571	0.632434	0.924802	0.9573
0.1268	0.705264	0.581601	0.317	0.565215	0.568153	0.811778	0.817274	0.673835	0.675385	0.63565	0.632479	0.924786	0.957237
0.1272	0.705303	0.581546	0.318	0.565111	0.568079	0.811711	0.817253	0.673813	0.675342	0.635725	0.632559	0.924777	0.957182
0.1276	0.705278	0.581518	0.319	0.564993	0.567988	0.811637	0.817187	0.6737	0.675315	0.63571	0.632673	0.92475	0.957129
0.128	0.705264	0.581483	0.32	0.564867	0.567901	0.811582	0.817204	0.673604	0.6753	0.635651	0.632796	0.924734	0.957129
0.1284	0.705201	0.581442	0.321	0.564802	0.567836	0.811607	0.817175	0.673451	0.67533	0.635608	0.6329	0.924734	0.957144
0.1288	0.705217	0.581398	0.322	0.564716	0.567775	0.811624	0.817204	0.67332	0.675352	0.635552	0.63296	0.924789	0.957175
0.1292	0.705163	0.581407	0.323	0.564667	0.567728	0.811706	0.817276	0.673226	0.675369	0.635488	0.632952	0.924887	0.957193
0.1296	0.705134	0.581405	0.324	0.564625	0.567712	0.811764	0.817413	0.673157	0.675391	0.635399	0.632898	0.924933	0.957198
0.13	0.705126	0.581375	0.325	0.564593	0.567697	0.811807	0.817543	0.673086	0.675416	0.635336	0.63286	0.924909	0.957159
0.1304	0.705115	0.581393	0.326	0.564579	0.567749	0.811874	0.817705	0.673096	0.675419	0.635275	0.632815	0.924828	0.957119
0.1308	0.705052	0.581383	0.327	0.564549	0.567841	0.811944	0.817888	0.673148	0.675396	0.635247	0.63273	0.924762	0.95712
0.1312	0.705029	0.581371	0.328	0.564511	0.567972	0.812037	0.817977	0.673239	0.675366	0.635227	0.632677	0.924711	0.957172
0.1316	0.704981	0.58133	0.329	0.564468	0.568099	0.812063	0.818033	0.673329	0.675341	0.63519	0.632588	0.924673	0.957264
0.132	0.704929	0.581309	0.33	0.564485	0.568218	0.812059	0.818016	0.673413	0.675321	0.635134	0.632559	0.924667	0.957388
0.1324	0.704875	0.581259	0.331	0.564516	0.568341	0.812041	0.817941	0.673496	0.675328	0.635069	0.632587	0.924681	0.957472
0.1328	0.70483	0.581226	0.332	0.564603	0.568458	0.812051	0.817833	0.67358	0.675352	0.635048	0.632642	0.924671	0.957486
0.1332	0.704774	0.581172	0.333	0.564713	0.568585	0.81206	0.817728	0.673635	0.675404	0.635055	0.632677	0.924709	0.957441
0.1336	0.70472	0.581129	0.334	0.564833	0.568644	0.812038	0.817659	0.673645	0.675449	0.635062	0.632626	0.924736	0.957362
0.134	0.704625	0.581101	0.335	0.564955	0.5687	0.811984	0.817586	0.673653	0.67548	0.635089	0.632557	0.924776	0.957287
0.1344	0.704566	0.581058	0.336	0.565059	0.568721	0.811914	0.817527	0.673657	0.675522	0.635083	0.632475	0.924782	0.957263
0.1348	0.704546	0.581036	0.337	0.565129	0.568698	0.811876	0.81747	0.673709	0.67554	0.635067	0.632381	0.924741	0.957265
0.1352	0.704466	0.581044	0.338	0.565184	0.568661	0.811887	0.817363	0.673697	0.675536	0.635049	0.632308	0.92475	0.957288
0.1356	0.704396	0.581046	0.339	0.565192	0.568586	0.811863	0.817262	0.673642	0.67551	0.635074	0.632247	0.92478	0.957281
0.136	0.704362	0.581042	0.34	0.565204	0.568511	0.811838	0.817191	0.673548	0.675471	0.635121	0.632243	0.924857	0.957254
0.1364	0.704356	0.581085	0.341	0.565178	0.568373	0.811794	0.817163	0.673496	0.675425	0.635201	0.632291	0.924907	0.95717
0.1368	0.70434	0.581108	0.342	0.565171	0.568245	0.811775	0.817126	0.673445	0.675385	0.635272	0.632377	0.92493	0.957087
0.1372	0.704318	0.581148	0.343	0.56513	0.568147	0.81179	0.817109	0.673373	0.675394	0.635355	0.632467	0.924912	0.957006
0.1376	0.704305	0.581185	0.344	0.565032	0.568023	0.811763	0.817107	0.67329	0.675383	0.635441	0.632543	0.924901	0.956975
0.138	0.704318	0.58122	0.345	0.56494	0.567922	0.811749	0.8171	0.673176	0.675382	0.635521	0.632605	0.924944	0.956986
0.1384	0.704322	0.581263	0.346	0.564871	0.567865	0.811689	0.8171	0.673094	0.675365	0.63555	0.632653	0.924948	0.957039
0.1388	0.704322	0.581312	0.347	0.564841	0.567858	0.811668	0.817097	0.673066	0.675357	0.635494	0.632688	0.924929	0.95705
0.1392	0.70433	0.581344	0.348	0.564797	0.567832	0.811675	0.817127	0.673039	0.675351	0.635367	0.63272	0.924845	0.957029
0.1396	0.704381	0.581411	0.349	0.564778	0.567803	0.811732	0.817211	0.673045	0.675326	0.635255	0.632751	0.924752	0.956981
0.14	0.704421	0.581433	0.35	0.564734	0.567778	0.811829	0.817368	0.673031	0.675319	0.635164	0.632751	0.92469	0.956977
0.1404	0.704433	0.581478	0.351	0.564668	0.567741	0.811972	0.817523	0.673021	0.675297	0.635082	0.632755	0.924667	0.957005
0.1408	0.704414	0.581518	0.352	0.564625	0.567774	0.812056	0.817671	0.67309	0.675277	0.635011	0.632753	0.924672	0.957085
0.1412	0.704465	0.581548	0.353	0.564593	0.567827	0.812126	0.81778	0.673191	0.675268	0.634936	0.632735	0.92465	0.957178
0.1416	0.704523	0.58157	0.354	0.564568	0.567928	0.812124	0.817816	0.673298	0.675247	0.634855	0.632693	0.924584	0.957244
0.142	0.704535	0.581612	0.355	0.564557	0.568054	0.812117	0.817814	0.673356	0.675243	0.634868	0.632652	0.924513	0.957279
0.1424	0.704566	0.581645	0.356	0.564583	0.568223	0.81211	0.81778	0.673399	0.675241	0.634919	0.632609	0.924475	0.957221
0.1428	0.704586	0.581663	0.357	0.564699	0.568379	0.812104	0.817725	0.673454	0.675261	0.63495	0.632548	0.924483	0.957149
0.1432	0.7046	0.581688	0.358	0.564848	0.568507	0.812085	0.817669	0.673517	0.675297	0.634948	0.63251	0.924465	0.957083
0.1436	0.70461	0.5817	0.359	0.565027	0.568599	0.812055	0.817589	0.673567	0.675336	0.634956	0.63246	0.924429	0.957041
0.144	0.704649	0.58173	0.36	0.565152	0.568626	0.812042	0.817563	0.673615	0.675358	0.634956	0.632394	0.924439	0.957054
0.1444	0.704649	0.581742	0.361	0.565185	0.568616	0.812033	0.817536	0.673668	0.675345	0.634987	0.632336	0.924474	0.957081
0.1448	0.704654	0.581775	0.362	0.565205	0.56857	0.812023	0.817489	0.673743	0.675309	0.635009	0.632246	0.924585	0.957069
0.1452	0.704663	0.581774	0.363	0.565219	0.568544	0.811966	0.81744	0.673779	0.675235	0.63501	0.632165	0.924657	0.957015
0.1456	0.704681	0.581779	0.364	0.565233	0.568518	0.811886	0.81735	0.673776	0.675163	0.635007	0.632128	0.92469	0.95691
0.146	0.704729	0.581794	0.365	0.565209	0.568461	0.811764	0.817221	0.67374	0.675127	0.635045	0.632072	0.924643	0.956792
0.1464	0.70475	0.581821	0.366	0.56518	0.568422	0.811689	0.817104	0.67369	0.675108	0.635112	0.632071	0.924597	0.956701
0.1468	0.704802	0.581812	0.367	0.565165	0.568332	0.811647	0.81703	0.673625	0.675101	0.635211	0.63208	0.924601	0.95665
0.1472	0.704877	0.58184	0.368	0.565158	0.568229	0.811649	0.816982	0.673539	0.675103	0.635333	0.632151	0.924643	0.956668
0.1476	0.70493	0.581846	0.369	0.565149	0.56814	0.811629	0.816946	0.673455	0.675112	0.635416	0.632246	0.924706	0.956698
0.148	0.704983	0.581838	0.37	0.56511	0.568043	0.811619	0.816988	0.673376	0.675129	0.635441	0.632349	0.924726	0.956738
0.1484	0.70503	0.58184	0.371	0.56502	0.567966	0.811655	0.816992	0.67332	0.675147	0.635438	0.63241	0.92472	0.956741
0.1488	0.705082	0.581822	0.372	0.564873	0.567866	0.811682	0.817047	0.673263	0.675181	0.635454	0.632478	0.92472	0.956721
0.1492	0.705135	0.581821	0.373	0.564737	0.567779	0.81174	0.817102	0.673194	0.675193	0.63547	0.632509	0.924757	0.956672
0.1496	0.705182	0.581807	0.374	0.56463	0.567728	0.811819	0.817204	0.673117	0.675207	0.635433	0.632534	0.924784	0.956631
0.15	0.705223	0.581775	0.375	0.56454	0.56772	0.811911	0.817314	0.673045	0.675217	0.635369	0.632589	0.924764	0.956639
0.1504	0.70522	0.581727	0.376	0.564477	0.567777	0.812002	0.817431	0.673021	0.675227	0.635268	0.632627	0.92468	0.956669
0.1508	0.705256	0.581711	0.377	0.564399	0.567839	0.812082	0.817628	0.673057	0.675257	0.635178	0.632661	0.924611	0.956709
0.1512	0.705267	0.581644	0.378	0.564375	0.567931	0.812133	0.81777	0.673152	0.675244	0.635094	0.632666	0.92455	0.956805
0.1516	0.70525	0.58158	0.379	0.564339	0.568015	0.812136	0.817871	0.673289	0.675228	0.635025	0.632631	0.924544	0.956881
0.152	0.705242	0.581535	0.38	0.564356	0.568135	0.812096	0.817902	0.673426	0.675206	0.634992	0.632561	0.924516	0.956935
0.1524	0.70517	0.58148	0.381	0.564376	0.568254	0.812028	0.817861	0.673539	0.6752	0.634946	0.632485	0.924446	0.956938
0.1528	0.70517	0.581428	0.382	0.564469	0.568391	0.811933	0.817747	0.673638	0.675214	0.634939	0.63241	0.924366	0.956895
0.1532	0.705135	0.581387	0.383	0.564592	0.568518	0.811831	0.81759	0.673705	0.675235	0.63495	0.632328	0.924351	0.956874
0.1536	0.70505	0.581355	0.384	0.564767	0.568598	0.811793	0.817505	0.673754	0.675243	0.634964	0.632266	0.924377	0.956857
0.154	0.705028	0.581356	0.385	0.564941	0.568659	0.811825	0.817392	0.673759	0.675258	0.634959	0.632212	0.924446	0.956902
0.1544	0.704984	0.581342	0.386	0.565081	0.568691	0.811862	0.817324	0.673734	0.675267	0.634943	0.632167	0.924531	0.956952
0.1548	0.704964	0.581335	0.387	0.565162	0.568716	0.811879	0.817263	0.673718	0.675254	0.6349	0.632121	0.924537	0.956989
0.1552	0.704934	0.581357	0.388	0.56516	0.568664	0.811873	0.817181	0.67372	0.675239	0.634879	0.632038	0.924505	0.956992
0.1556	0.704927	0.581369	0.389	0.565126	0.568568	0.811825	0.817121	0.673728	0.675193	0.634865	0.631957	0.924482	0.956941
0.156	0.704901	0.581399	0.39	0.565043	0.568453	0.811778	0.817062	0.673713	0.675121	0.634898	0.631911	0.924476	0.956878
0.1564	0.704912	0.581428	0.391	0.564988	0.568346	0.811689	0.817011	0.673686	0.675062	0.634977	0.631887	0.924486	0.956797
0.1568	0.70489	0.581459	0.392	0.564948	0.568242	0.81161	0.816966	0.673612	0.675014	0.635085	0.631948	0.924492	0.956724
0.1572	0.704875	0.581483	0.393	0.564909	0.568155	0.811535	0.816943	0.673503	0.675008	0.635175	0.632062	0.924497	0.956678
0.1576	0.704859	0.581503	0.394	0.564892	0.568047	0.811489	0.816961	0.673393	0.675033	0.635249	0.632172	0.924537	0.956685
0.158	0.704851	0.581491	0.395	0.564869	0.567946	0.811514	0.816985	0.673311	0.675067	0.635298	0.632271	0.924579	0.956747
0.1584	0.704871	0.581523	0.396	0.56485	0.567882	0.811591	0.817018	0.673243	0.675102	0.635349	0.632338	0.924698	0.956795
0.1588	0.704854	0.581527	0.397	0.564827	0.567851	0.811684	0.817029	0.67321	0.675132	0.63537	0.63236	0.924728	0.956799
0.1592	0.704824	0.581505	0.398	0.564772	0.567811	0.811718	0.817039	0.673156	0.675151	0.635299	0.632378	0.924705	0.956726
0.1596	0.70478	0.581531	0.399	0.564695	0.567769	0.811728	0.817051	0.673085	0.675157	0.635187	0.632384	0.924633	0.956654
0.16	0.704744	0.581507	0.4	0.564588	0.567746	0.811734	0.817173	0.673048	0.675158	0.635061	0.632389	0.924576	0.956602
0.1604	0.704733	0.581524	0.401	0.564455	0.567731	0.81177	0.817339	0.673065	0.675128	0.634981	0.632416	0.924566	0.956632
0.1608	0.704676	0.581516	0.402	0.564396	0.567763	0.811819	0.817494	0.67311	0.675105	0.634933	0.632471	0.924532	0.956665
0.1612	0.704635	0.581514	0.403	0.564382	0.567838	0.811857	0.817632	0.673187	0.675091	0.634896	0.632502	0.92453	0.956732
0.1616	0.704581	0.581518	0.404	0.564375	0.567898	0.81189	0.817702	0.673251	0.675098	0.634863	0.632495	0.924527	0.956768
0.162	0.70453	0.5815	0.405	0.564373	0.568007	0.811871	0.817715	0.673295	0.675131	0.634844	0.632429	0.924492	0.95677
0.1624	0.704473	0.581487	0.406	0.564391	0.568108	0.81192	0.817709	0.673337	0.675186	0.634831	0.632337	0.924496	0.956757
0.1628	0.704433	0.581486	0.407	0.564449	0.568263	0.81193	0.817683	0.67342	0.675257	0.634825	0.632218	0.924502	0.956753
0.1632	0.704405	0.581497	0.408	0.564547	0.568362	0.811899	0.817659	0.673507	0.675309	0.634797	0.632133	0.924484	0.956743
0.1636	0.70439	0.581506	0.409	0.56467	0.568441	0.811841	0.81759	0.673598	0.675349	0.634762	0.632055	0.924424	0.956729
0.164	0.70439	0.581482	0.41	0.564741	0.568485	0.811781	0.817536	0.673666	0.675383	0.634756	0.631982	0.924355	0.956763
0.1644	0.704362	0.581503	0.411	0.564769	0.56851	0.811776	0.817442	0.673704	0.675359	0.634739	0.631925	0.924331	0.956801
0.1648	0.704381	0.58152	0.412	0.564825	0.568497	0.811789	0.81733	0.673723	0.67531	0.634768	0.631854	0.924358	0.956834
0.1652	0.704408	0.581507	0.413	0.564887	0.568458	0.811774	0.817241	0.67372	0.675234	0.634784	0.631799	0.924407	0.956824
0.1656	0.704469	0.581535	0.414	0.564948	0.568412	0.811746	0.817122	0.673741	0.675164	0.634824	0.631767	0.924434	0.956757
0.166	0.704519	0.581577	0.415	0.564975	0.568365	0.811693	0.817015	0.673755	0.675112	0.634868	0.631771	0.924405	0.956666
0.1664	0.704562	0.581587	0.416	0.564978	0.568311	0.811653	0.816948	0.673729	0.675074	0.634931	0.63178	0.924357	0.956583
0.1668	0.704598	0.581594	0.417	0.564972	0.568217	0.811616	0.816944	0.673665	0.67506	0.634971	0.631796	0.924309	0.956514
0.1672	0.704681	0.581604	0.418	0.564944	0.568109	0.811577	0.816974	0.67356	0.675059	0.635059	0.631824	0.924351	0.956504
0.1676	0.704718	0.58161	0.419	0.564942	0.567985	0.811537	0.81698	0.673449	0.675081	0.635157	0.631864	0.924418	0.956527
0.168	0.704785	0.581624	0.42	0.564944	0.56789	0.811489	0.816984	0.673336	0.675098	0.635229	0.631948	0.924463	0.956562
0.1684	0.704799	0.581643	0.421	0.564977	0.567829	0.811526	0.816926	0.673229	0.675133	0.635267	0.632045	0.924492	0.956582
0.1688	0.704822	0.581666	0.422	0.564939	0.567756	0.811549	0.81687	0.673097	0.675156	0.635283	0.632139	0.924528	0.956587
0.1692	0.704837	0.581688	0.423	0.564868	0.567729	0.811629	0.816866	0.672991	0.67514	0.635316	0.632174	0.924538	0.956574
0.1696	0.704889	0.581718	0.424	0.56476	0.567669	0.811688	0.816951	0.672948	0.675124	0.635305	0.632203	0.924516	0.956586
0.17	0.704901	0.581798	0.425	0.564646	0.567654	0.811708	0.817076	0.672937	0.675094	0.635254	0.632229	0.924464	0.956563
0.1704	0.704914	0.58182	0.426	0.564573	0.567671	0.811764	0.817227	0.672922	0.675069	0.635184	0.632264	0.924375	0.956559
0.1708	0.704924	0.58185	0.427	0.564483	0.567704	0.811786	0.817382	0.672936	0.675068	0.635073	0.63232	0.924297	0.956575
0.1712	0.704959	0.581841	0.428	0.564448	0.567762	0.811847	0.817507	0.672969	0.675095	0.634975	0.632354	0.924287	0.956567
0.1716	0.704962	0.581854	0.429	0.564431	0.567852	0.81191	0.817607	0.673025	0.675116	0.634907	0.63236	0.924339	0.956619
0.172	0.704974	0.581839	0.43	0.564519	0.567972	0.811941	0.81768	0.673103	0.675111	0.63486	0.632327	0.9244	0.956646
0.1724	0.704973	0.581867	0.431	0.564594	0.568079	0.8119	0.81768	0.673191	0.675094	0.63479	0.632294	0.92439	0.956668
0.1728	0.705029	0.581845	0.432	0.56469	0.568216	0.811879	0.817585	0.67328	0.67507	0.63474	0.632236	0.924358	0.956607
0.1732	0.704992	0.581793	0.433	0.56477	0.568332	0.811895	0.817465	0.673324	0.675058	0.63472	0.632161	0.924301	0.9566
0.1736	0.705036	0.581759	0.434	0.564825	0.568424	0.811903	0.817385	0.673359	0.675043	0.6347	0.632042	0.924305	0.956608
0.174	0.705045	0.581746	0.435	0.564903	0.568538	0.811874	0.817309	0.673421	0.675008	0.634697	0.631979	0.92429	0.956664
0.1744	0.705088	0.581692	0.436	0.564976	0.568632	0.811854	0.817251	0.673443	0.674968	0.634691	0.631935	0.924328	0.956687
0.1748	0.705142	0.581673	0.437	0.565064	0.568694	0.811814	0.817203	0.673496	0.674943	0.634646	0.631914	0.924374	0.956688
0.1752	0.70517	0.58167	0.438	0.565095	0.568673	0.811785	0.817119	0.673496	0.674956	0.634632	0.631882	0.924412	0.956651
0.1756	0.705252	0.581653	0.439	0.565125	0.568587	0.811771	0.81706	0.673484	0.674989	0.634664	0.631836	0.924461	0.956585
0.176	0.705301	0.581615	0.44	0.565142	0.568486	0.81175	0.817033	0.673463	0.67501	0.634744	0.631775	0.924494	0.956523
0.1764	0.705338	0.5816	0.441	0.565141	0.568374	0.811669	0.816988	0.67347	0.674986	0.634838	0.631736	0.924452	0.956412
0.1768	0.705395	0.581563	0.442	0.565125	0.568276	0.811583	0.816918	0.673477	0.674947	0.634945	0.63176	0.924428	0.956299
0.1772	0.705447	0.581545	0.443	0.565107	0.568205	0.811506	0.816882	0.67345	0.67491	0.635043	0.631837	0.924413	0.956258
0.1776	0.70547	0.581508	0.444	0.565052	0.568126	0.811442	0.816857	0.673406	0.674893	0.635112	0.63196	0.924422	0.956263
0.178	0.705436	0.581424	0.445	0.564986	0.568031	0.811429	0.816852	0.673309	0.674912	0.635174	0.632075	0.924512	0.956301
0.1784	0.705422	0.581386	0.446	0.564936	0.567935	0.811425	0.816858	0.673214	0.674938	0.635162	0.632201	0.924584	0.956339
0.1788	0.705408	0.581335	0.447	0.564912	0.567866	0.811439	0.816855	0.673148	0.67499	0.635147	0.632294	0.924624	0.956341
0.1792	0.705362	0.58129	0.448	0.564867	0.56778	0.811454	0.816864	0.673063	0.675051	0.635116	0.632359	0.924585	0.956338
0.1796	0.705318	0.58126	0.449	0.564823	0.567731	0.811451	0.816894	0.672983	0.675105	0.635098	0.632406	0.924517	0.956301
0.18	0.705257	0.581213	0.45	0.56473	0.5677	0.811503	0.817002	0.67291	0.675131	0.635046	0.632375	0.924426	0.956265
0.1804	0.705206	0.581228	0.451	0.564618	0.567686	0.811556	0.817155	0.672889	0.675106	0.63495	0.632368	0.924342	0.956232
0.1808	0.705121	0.58115	0.452	0.564531	0.567752	0.811611	0.817283	0.672925	0.675056	0.634852	0.632324	0.924261	0.956251
0.1812	0.705072	0.581129	0.453	0.56443	0.567863	0.811668	0.817431	0.672996	0.675069	0.634762	0.632284	0.924196	0.956354
0.1816	0.705002	0.581133	0.454	0.564377	0.567932	0.811739	0.817521	0.673069	0.675095	0.634678	0.632235	0.924152	0.956451
0.182	0.704976	0.581117	0.455	0.564344	0.567974	0.811808	0.817531	0.673102	0.67514	0.634621	0.632177	0.924124	0.956528
0.1824	0.704939	0.581113	0.456	0.564365	0.568025	0.811896	0.817522	0.673149	0.675145	0.634572	0.632115	0.924159	0.956546
0.1828	0.70492	0.581129	0.457	0.564421	0.568091	0.811955	0.817514	0.673188	0.675124	0.634519	0.632023	0.924189	0.956524
0.1832	0.704877	0.581109	0.458	0.564504	0.568203	0.811932	0.817498	0.673216	0.675096	0.634516	0.631962	0.924184	0.956509
0.1836	0.704857	0.581143	0.459	0.564608	0.568338	0.811906	0.817422	0.673302	0.67509	0.634562	0.631898	0.924142	0.956484
0.184	0.704837	0.581144	0.46	0.564704	0.568425	0.811875	0.817381	0.673376	0.675085	0.634582	0.63177	0.924112	0.9565
0.1844	0.704847	0.581163	0.461	0.564755	0.568481	0.811842	0.817315	0.673456	0.675051	0.634615	0.631656	0.924134	0.956515
0.1848	0.70484	0.581179	0.462	0.564806	0.568521	0.811814	0.817241	0.673533	0.67502	0.634616	0.631535	0.924188	0.956556
0.1852	0.704819	0.581208	0.463	0.564862	0.568552	0.811769	0.817184	0.67358	0.674995	0.634633	0.631455	0.924243	0.956553
0.1856	0.70479	0.581226	0.464	0.564943	0.568555	0.811744	0.817124	0.673624	0.674971	0.634672	0.631442	0.924303	0.956545
0.186	0.704747	0.581246	0.465	0.565016	0.568536	0.811711	0.81703	0.673646	0.674965	0.634702	0.631476	0.924337	0.956462
0.1864	0.704763	0.581266	0.466	0.565061	0.568492	0.811676	0.816949	0.673655	0.674934	0.634781	0.631516	0.924358	0.956385
0.1868	0.704718	0.581271	0.467	0.565102	0.568401	0.81165	0.81691	0.673637	0.674885	0.634876	0.631557	0.924383	0.956299
0.1872	0.704687	0.581281	0.468	0.565175	0.568308	0.811587	0.816869	0.673589	0.674818	0.635011	0.631629	0.924413	0.956291
0.1876	0.704639	0.581297	0.469	0.565248	0.568245	0.811523	0.816834	0.673503	0.674764	0.635129	0.63169	0.924458	0.956305
0.188	0.704629	0.581281	0.47	0.56527	0.568178	0.811482	0.816813	0.673369	0.674763	0.635168	0.631769	0.924514	0.956364
0.1884	0.704607	0.581287	0.471	0.565212	0.568093	0.811492	0.816793	0.673263	0.674784	0.635141	0.631809	0.92454	0.956355
0.1888	0.70458	0.581316	0.472	0.565107	0.567985	0.811509	0.8168	0.673153	0.674818	0.635071	0.631869	0.92456	0.956309
0.1892	0.704561	0.581324	0.473	0.564964	0.567887	0.811599	0.816858	0.67308	0.674823	0.634992	0.631918	0.924572	0.956211
0.1896	0.704569	0.581356	0.474	0.564816	0.567816	0.811671	0.816981	0.673029	0.674833	0.6349	0.632007	0.924569	0.956105
0.19	0.70456	0.58141	0.475	0.564622	0.567782	0.811732	0.817108	0.672987	0.674857	0.634844	0.632054	0.924525	0.955998
0.1904	0.704527	0.581442	0.476	0.564472	0.567801	0.811763	0.817246	0.672957	0.674875	0.6348	0.632114	0.924429	0.955956
0.1908	0.704577	0.581474	0.477	0.564323	0.567851	0.811795	0.817401	0.673002	0.674872	0.634759	0.632138	0.924287	0.955992
0.1912	0.704551	0.581521	0.478	0.564245	0.567892	0.811793	0.817517	0.673089	0.674847	0.634721	0.632167	0.924163	0.956073
0.1916	0.70458	0.581554	0.479	0.564237	0.567991	0.811762	0.817601	0.673179	0.674836	0.634723	0.632167	0.924087	0.956184
0.192	0.704586	0.581635	0.48	0.564322	0.568091	0.811773	0.817609	0.673272	0.674852	0.634705	0.632145	0.924076	0.956251
0.1924	0.704619	0.581657	0.481	0.564426	0.568161	0.811759	0.817549	0.67332	0.674866	0.634655	0.632095	0.924059	0.956279
0.1928	0.704636	0.5817	0.482	0.564569	0.568268	0.811752	0.817462	0.673417	0.674896	0.634597	0.632046	0.924013	0.956265
0.1932	0.70468	0.58174	0.483	0.5647	0.568322	0.811743	0.817381	0.673542	0.674935	0.634517	0.631969	0.924013	0.956308
0.1936	0.704704	0.58176	0.484	0.564791	0.568358	0.811748	0.817364	0.673657	0.674946	0.634432	0.631853	0.924006	0.956361
0.194	0.704795	0.581822	0.485	0.564856	0.56839	0.811749	0.817296	0.673723	0.674925	0.634375	0.631735	0.924034	0.95642
0.1944	0.704836	0.581863	0.486	0.564881	0.568446	0.811725	0.817241	0.673717	0.674934	0.634354	0.631604	0.924046	0.956453
0.1948	0.704856	0.581918	0.487	0.564932	0.56848	0.811669	0.817193	0.673738	0.674921	0.634384	0.631513	0.924053	0.956428
0.1952	0.704909	0.581993	0.488	0.564975	0.568486	0.811631	0.817093	0.67375	0.674919	0.63444	0.631446	0.924085	0.956354
0.1956	0.704929	0.582039	0.489	0.565016	0.568462	0.811571	0.817012	0.673775	0.674901	0.634522	0.63144	0.924075	0.956298
0.196	0.704958	0.582109	0.49	0.56503	0.568419	0.811538	0.816914	0.673804	0.674879	0.634641	0.631444	0.924122	0.956266
0.1964	0.704973	0.582149	0.491	0.565044	0.568357	0.811513	0.816817	0.673762	0.67486	0.634759	0.631455	0.92416	0.956241
0.1968	0.705003	0.582187	0.492	0.565034	0.568277	0.811468	0.81673	0.673675	0.674866	0.634876	0.631489	0.924212	0.956193
0.1972	0.705041	0.582189	0.493	0.565021	0.568153	0.811454	0.816687	0.673574	0.674876	0.634952	0.631506	0.924266	0.956196
0.1976	0.705039	0.582157	0.494	0.564987	0.568048	0.811423	0.816676	0.673479	0.674877	0.634973	0.631549	0.924308	0.956217
0.198	0.705082	0.582139	0.495	0.56493	0.567902	0.811402	0.816676	0.67337	0.674897	0.634983	0.631613	0.92433	0.956219
0.1984	0.705098	0.582109	0.496	0.564832	0.567795	0.811395	0.816689	0.67327	0.674923	0.635014	0.631685	0.924369	0.956213
0.1988	0.705113	0.582027	0.497	0.564703	0.567689	0.811393	0.816675	0.673189	0.674935	0.634988	0.631726	0.924403	0.956181
0.1992	0.705099	0.58199	0.498	0.564558	0.567613	0.811388	0.816696	0.673143	0.67495	0.634977	0.631767	0.924388	0.956126
0.1996	0.705133	0.581962	0.499	0.564457	0.567559	0.811419	0.816746	0.673129	0.674966	0.634966	0.631829	0.924325	0.95606
0.2	0.705135	0.581883	0.5	0.564363	0.567542	0.811499	0.81685	0.673115	0.674973	0.634926	0.631903	0.924234	0.956023
0.2004	0.705122	0.58186	0.501	0.56428	0.567547	0.811598	0.817023	0.673116	0.674948	0.634883	0.631955	0.924197	0.956023
0.2008	0.705106	0.58184	0.502	0.564194	0.56758	0.81167	0.817177	0.673076	0.674904	0.634828	0.632025	0.924173	0.956048
0.2012	0.70511	0.581782	0.503	0.564125	0.567614	0.811725	0.817297	0.673049	0.674876	0.63475	0.632042	0.924146	0.956118
0.2016	0.705154	0.581778	0.504	0.564102	0.567678	0.811756	0.817373	0.673042	0.67485	0.634669	0.63204	0.924123	0.956168
0.202	0.70512	0.581751	0.505	0.564109	0.567767	0.811721	0.817397	0.673028	0.674841	0.634614	0.631979	0.924114	0.956225
0.2024	0.705107	0.58172	0.506	0.564186	0.567877	0.811702	0.817427	0.673048	0.674855	0.634589	0.63186	0.924143	0.956233
0.2028	0.705139	0.58168	0.507	0.564297	0.568015	0.811709	0.81743	0.673106	0.674875	0.634572	0.631738	0.924207	0.956258
0.2032	0.705173	0.581623	0.508	0.564431	0.568094	0.811719	0.817412	0.673182	0.674887	0.634538	0.631638	0.924255	0.956242
0.2036	0.705163	0.58157	0.509	0.564556	0.568164	0.811739	0.817357	0.673262	0.674906	0.634513	0.631542	0.92425	0.956236
0.204	0.705153	0.581545	0.51	0.564631	0.568218	0.811775	0.817349	0.673373	0.674896	0.634472	0.631493	0.924261	0.956232
0.2044	0.705128	0.581465	0.511	0.564691	0.568279	0.811783	0.817333	0.673483	0.674859	0.634493	0.631444	0.924277	0.956207
0.2048	0.70512	0.581418	0.512	0.564772	0.568331	0.811756	0.817313	0.673552	0.674846	0.63451	0.631418	0.924298	0.956231
0.2052	0.705087	0.581395	0.513	0.564836	0.568357	0.811679	0.817251	0.673582	0.674795	0.634555	0.631411	0.924258	0.956267
0.2056	0.705051	0.581388	0.514	0.564934	0.568369	0.811576	0.817144	0.673627	0.674758	0.6346	0.631396	0.924205	0.956276
0.206	0.704992	0.581395	0.515	0.565002	0.568368	0.811462	0.816988	0.673656	0.674714	0.634632	0.631412	0.924127	0.956226
0.2064	0.704944	0.58137	0.516	0.565095	0.568401	0.811379	0.816806	0.673663	0.674693	0.634667	0.631424	0.924092	0.956167
0.2068	0.704912	0.581375	0.517	0.565216	0.568396	0.811339	0.816739	0.673637	0.674695	0.634668	0.631461	0.924098	0.956099
0.2072	0.704814	0.581383	0.518	0.56527	0.568355	0.811307	0.816693	0.673563	0.674698	0.634656	0.631524	0.924133	0.956063
0.2076	0.704783	0.581373	0.519	0.565262	0.568241	0.811322	0.816675	0.673503	0.674717	0.634671	0.631589	0.924174	0.956058
0.208	0.704744	0.58137	0.52	0.565182	0.568094	0.811327	0.816704	0.673429	0.674747	0.63467	0.63164	0.924197	0.956085
0.2084	0.704712	0.58138	0.521	0.565066	0.567974	0.81135	0.81671	0.673354	0.674781	0.634696	0.631665	0.924212	0.956083
0.2088	0.704649	0.581369	0.522	0.564887	0.567868	0.811374	0.816757	0.67324	0.674793	0.634702	0.631721	0.924188	0.956054
0.2092	0.704626	0.581334	0.523	0.564765	0.567788	0.811366	0.816809	0.673121	0.674797	0.634703	0.631794	0.924174	0.955992
0.2096	0.704592	0.581357	0.524	0.564646	0.567741	0.81135	0.816867	0.673033	0.674803	0.634686	0.631871	0.924125	0.955907
0.21	0.704525	0.581318	0.525	0.564559	0.567728	0.811324	0.816938	0.672944	0.674793	0.634655	0.631958	0.92403	0.955889
0.2104	0.704529	0.581283	0.526	0.564498	0.567759	0.811323	0.817015	0.672873	0.674797	0.634622	0.632043	0.923959	0.955901
0.2108	0.704473	0.581287	0.527	0.564431	0.567788	0.811348	0.817133	0.672828	0.674824	0.634595	0.632085	0.923933	0.955941
0.2112	0.704445	0.581257	0.528	0.564385	0.56778	0.811421	0.817231	0.672815	0.674843	0.634587	0.632106	0.923984	0.956
0.2116	0.704429	0.581263	0.529	0.564374	0.567763	0.811488	0.817366	0.672857	0.674873	0.634586	0.632087	0.924059	0.95608
0.212	0.7044	0.581236	0.53	0.564405	0.567799	0.81159	0.817436	0.672915	0.674894	0.63453	0.632024	0.924138	0.956148
0.2124	0.704413	0.581241	0.531	0.564439	0.567881	0.811675	0.817454	0.673	0.674893	0.634452	0.631919	0.924173	0.956183
0.2128	0.704367	0.581227	0.532	0.564493	0.568014	0.811718	0.817405	0.673072	0.674875	0.634365	0.631835	0.924201	0.956205
0.2132	0.704379	0.581229	0.533	0.564559	0.568159	0.811739	0.817363	0.67317	0.674856	0.634284	0.631726	0.924192	0.956225
0.2136	0.704361	0.581214	0.534	0.56461	0.568244	0.81175	0.81737	0.673233	0.674848	0.634222	0.631641	0.92417	0.956235
0.214	0.704357	0.581213	0.535	0.564688	0.568322	0.811735	0.817326	0.673315	0.674829	0.634212	0.631554	0.924126	0.956263
0.2144	0.704389	0.58122	0.536	0.564774	0.5684	0.811763	0.817285	0.673359	0.674845	0.63422	0.631482	0.924107	0.956308
0.2148	0.704367	0.581233	0.537	0.564863	0.568466	0.811773	0.817235	0.673403	0.674841	0.634236	0.631418	0.92411	0.956325
0.2152	0.704357	0.581254	0.538	0.564932	0.568504	0.811767	0.81716	0.673418	0.674851	0.634311	0.631383	0.924168	0.956273
0.2156	0.704388	0.581277	0.539	0.564986	0.568499	0.811741	0.817097	0.673411	0.674844	0.634425	0.631339	0.924191	0.956159
0.216	0.704383	0.581334	0.54	0.565023	0.56846	0.811704	0.817076	0.67341	0.674826	0.634542	0.631301	0.924227	0.956063
0.2164	0.704388	0.581392	0.541	0.565052	0.5684	0.811607	0.816976	0.673423	0.674796	0.634627	0.631284	0.924234	0.955957
0.2168	0.704363	0.58146	0.542	0.565076	0.568345	0.811525	0.816848	0.673432	0.674766	0.634694	0.631303	0.924241	0.955899
0.2172	0.704353	0.581494	0.543	0.565068	0.568275	0.811496	0.816767	0.673437	0.674774	0.634715	0.631333	0.924227	0.955861
0.2176	0.704376	0.581567	0.544	0.56501	0.568168	0.811514	0.816692	0.673407	0.674774	0.634727	0.631399	0.9242	0.955841
0.218	0.704395	0.581607	0.545	0.564943	0.568027	0.811537	0.816657	0.673331	0.674769	0.634779	0.63148	0.924202	0.955845
0.2184	0.704439	0.581676	0.546	0.564846	0.567892	0.811535	0.81666	0.67327	0.674753	0.634819	0.631601	0.924204	0.95585
0.2188	0.704416	0.581717	0.547	0.564786	0.567816	0.811524	0.816667	0.673196	0.674741	0.634823	0.63167	0.924206	0.955839
0.2192	0.704434	0.581727	0.548	0.564695	0.567789	0.811504	0.816683	0.673168	0.674715	0.634823	0.631732	0.924167	0.955814
0.2196	0.704495	0.581742	0.549	0.564592	0.567775	0.811471	0.816724	0.673151	0.674687	0.634803	0.631799	0.924133	0.955767
0.22	0.70453	0.58178	0.55	0.564483	0.567768	0.811491	0.81681	0.673122	0.67467	0.634775	0.631827	0.924095	0.955726
0.2204	0.70455	0.581784	0.551	0.564404	0.567713	0.811496	0.816897	0.673104	0.674648	0.634735	0.631859	0.924091	0.955718
0.2208	0.704587	0.581793	0.552	0.564379	0.567661	0.811482	0.816964	0.673048	0.674622	0.634679	0.631903	0.924099	0.95573
0.2212	0.704637	0.581807	0.553	0.564431	0.567676	0.811485	0.81704	0.67304	0.674602	0.634579	0.63197	0.924143	0.955784
0.2216	0.704662	0.581795	0.554	0.564509	0.567724	0.811542	0.81709	0.673062	0.674591	0.634504	0.631993	0.92417	0.955825
0.222	0.704669	0.581803	0.555	0.564556	0.567807	0.811616	0.817165	0.673093	0.67461	0.634436	0.63197	0.924163	0.955858
0.2224	0.704713	0.581797	0.556	0.564592	0.567899	0.811702	0.817236	0.673136	0.674616	0.634404	0.631865	0.92414	0.955847
0.2228	0.704743	0.581808	0.557	0.564626	0.568018	0.811737	0.817292	0.673198	0.674643	0.63435	0.631711	0.924065	0.95587
0.2232	0.70478	0.581803	0.558	0.564676	0.568129	0.811731	0.8173	0.67325	0.674653	0.634302	0.631566	0.92398	0.955901
0.2236	0.704789	0.581796	0.559	0.564721	0.568283	0.811743	0.817241	0.673298	0.674658	0.634266	0.631457	0.9239	0.955952
0.224	0.704844	0.581782	0.56	0.564778	0.568392	0.811712	0.817188	0.673349	0.674676	0.634226	0.631344	0.923836	0.956015
0.2244	0.704896	0.581751	0.561	0.564827	0.568488	0.811687	0.817135	0.673429	0.674651	0.63421	0.631288	0.923819	0.95607
0.2248	0.704923	0.581746	0.562	0.564899	0.568508	0.811663	0.817078	0.673503	0.674657	0.63422	0.631246	0.92387	0.956101
0.2252	0.704951	0.581744	0.563	0.564991	0.56852	0.811615	0.817057	0.673612	0.674644	0.634248	0.631214	0.923928	0.956142
0.2256	0.704977	0.581743	0.564	0.565095	0.568507	0.81158	0.817003	0.673724	0.674629	0.634285	0.631189	0.923981	0.956135
0.226	0.704976	0.581712	0.565	0.56516	0.568462	0.81153	0.816893	0.673783	0.674618	0.634386	0.631154	0.923999	0.95607
0.2264	0.704983	0.58171	0.566	0.565186	0.568418	0.811497	0.816757	0.673836	0.674635	0.63451	0.631099	0.924003	0.955981
0.2268	0.704979	0.581676	0.567	0.565162	0.568333	0.811457	0.816661	0.67382	0.674673	0.634634	0.631061	0.924036	0.955852
0.2272	0.705027	0.581695	0.568	0.565131	0.568233	0.811397	0.816606	0.673782	0.674686	0.634691	0.631044	0.924068	0.955769
0.2276	0.705035	0.581672	0.569	0.565097	0.56816	0.811357	0.816576	0.673691	0.67467	0.634717	0.631098	0.924104	0.955761
0.228	0.70501	0.581668	0.57	0.565019	0.568109	0.811311	0.816599	0.673579	0.674655	0.634667	0.631185	0.924133	0.955832
0.2284	0.704994	0.581634	0.571	0.564928	0.568039	0.811301	0.816597	0.673495	0.674627	0.634637	0.631321	0.924178	0.955877
0.2288	0.705026	0.581584	0.572	0.564815	0.567917	0.811313	0.816615	0.673385	0.674623	0.634606	0.631431	0.92421	0.955856
0.2292	0.705058	0.581565	0.573	0.564697	0.567783	0.811356	0.816657	0.673284	0.674612	0.634617	0.631477	0.924247	0.955786
0.2296	0.70507	0.581528	0.574	0.564612	0.567676	0.811407	0.8167	0.673189	0.67462	0.634624	0.63149	0.924261	0.955697
0.23	0.70508	0.581509	0.575	0.564511	0.567634	0.811447	0.816751	0.673104	0.674625	0.634658	0.631529	0.924255	0.955658
0.2304	0.705087	0.581452	0.576	0.564426	0.567633	0.811461	0.816814	0.67304	0.674646	0.634699	0.63154	0.92421	0.955644
0.2308	0.705081	0.581446	0.577	0.564303	0.567617	0.811446	0.816935	0.673046	0.674641	0.634694	0.631556	0.924204	0.95569
0.2312	0.705052	0.581383	0.578	0.564225	0.567604	0.811448	0.817056	0.67304	0.674657	0.634668	0.631556	0.92423	0.955759
0.2316	0.705017	0.581347	0.579	0.564199	0.567652	0.811466	0.817207	0.673067	0.674698	0.634611	0.631581	0.924251	0.955835
0.232	0.70497	0.581298	0.58	0.564253	0.567729	0.811492	0.817302	0.673113	0.674733	0.634541	0.631582	0.92426	0.955884
0.2324	0.704915	0.581285	0.581	0.56432	0.567835	0.811518	0.817323	0.673206	0.674754	0.634448	0.631613	0.924196	0.955942
0.2328	0.704873	0.58129	0.582	0.564435	0.567934	0.81157	0.817283	0.673311	0.67477	0.63438	0.631601	0.92411	0.955924
0.2332	0.704786	0.581274	0.583	0.564516	0.568052	0.811677	0.817267	0.673415	0.674773	0.63432	0.631524	0.924031	0.955916
0.2336	0.70473	0.581252	0.584	0.564576	0.568181	0.811755	0.817254	0.673505	0.674753	0.634257	0.631404	0.923989	0.955929
0.234	0.704652	0.581274	0.585	0.564646	0.568316	0.811817	0.817243	0.673575	0.674727	0.634234	0.631303	0.923928	0.955961
0.2344	0.704591	0.581287	0.586	0.564722	0.568431	0.811797	0.817244	0.673637	0.674716	0.634189	0.631219	0.923878	0.956016
0.2348	0.704524	0.581288	0.587	0.564786	0.568505	0.81172	0.817206	0.673724	0.674699	0.634173	0.63118	0.923821	0.956039
0.2352	0.704517	0.581289	0.588	0.564843	0.568496	0.811642	0.817117	0.673773	0.67471	0.634156	0.631133	0.923804	0.95601
0.2356	0.704416	0.581302	0.589	0.564895	0.568462	0.811563	0.817002	0.673786	0.674697	0.634176	0.631094	0.923814	0.955925
0.236	0.704372	0.58131	0.59	0.56494	0.568407	0.811501	0.816876	0.673789	0.674682	0.634223	0.631056	0.923851	0.95582
0.2364	0.704373	0.581337	0.591	0.565008	0.568363	0.811445	0.81676	0.67376	0.674678	0.634294	0.631053	0.923872	0.955714
0.2368	0.704393	0.581364	0.592	0.56502	0.568353	0.811423	0.816608	0.673738	0.674656	0.634401	0.631048	0.923869	0.955608
0.2372	0.704369	0.581382	0.593	0.565015	0.568288	0.811402	0.816513	0.673648	0.674641	0.634523	0.63103	0.923875	0.955606
0.2376	0.704371	0.581376	0.594	0.564939	0.568215	0.811379	0.816466	0.673584	0.674627	0.63461	0.631042	0.923912	0.955628
0.238	0.704383	0.58141	0.595	0.564886	0.568082	0.811354	0.81642	0.673507	0.67461	0.634667	0.631081	0.923977	0.95568
0.2384	0.704411	0.581454	0.596	0.56484	0.56798	0.811317	0.816453	0.673446	0.674567	0.634675	0.631153	0.924045	0.955771
0.2388	0.704432	0.581473	0.597	0.564837	0.567912	0.811289	0.816468	0.673401	0.674509	0.634619	0.631245	0.924089	0.955813
0.2392	0.704443	0.5815	0.598	0.564789	0.567815	0.811247	0.816464	0.673317	0.674481	0.634558	0.631321	0.924115	0.955777
0.2396	0.704462	0.581519	0.599	0.564718	0.567768	0.811185	0.816504	0.673214	0.674486	0.634511	0.631423	0.924133	0.955733
0.24	0.704445	0.581556	0.6	0.564632	0.567714	0.811211	0.816608	0.673127	0.674505	0.634518	0.631476	0.924168	0.955678
0.2404	0.704471	0.581574	0.601	0.564543	0.56766	0.811238	0.816757	0.673067	0.674518	0.634525	0.631497	0.924204	0.955676
0.2408	0.704464	0.581593	0.602	0.564486	0.567643	0.81128	0.816881	0.672991	0.674531	0.63452	0.631499	0.924219	0.955707
0.2412	0.704456	0.581624	0.603	0.564442	0.567646	0.811326	0.816992	0.672941	0.674567	0.634472	0.631515	0.924189	0.95577
0.2416	0.704428	0.581663	0.604	0.5644	0.567698	0.811399	0.817052	0.672917	0.674591	0.634421	0.63153	0.924127	0.955811
0.242	0.704447	0.581712	0.605	0.564353	0.567745	0.811479	0.817134	0.672917	0.674615	0.634338	0.631525	0.924081	0.955819
0.2424	0.704431	0.581726	0.606	0.564351	0.567816	0.811577	0.81722	0.672962	0.674633	0.634267	0.631515	0.924041	0.955812
0.2428	0.704442	0.581758	0.607	0.564405	0.567921	0.811704	0.817276	0.673032	0.674644	0.634188	0.631467	0.924018	0.955785
0.2432	0.704474	0.581792	0.608	0.564478	0.568001	0.81176	0.817326	0.673086	0.67466	0.634134	0.631421	0.923981	0.955815
0.2436	0.704472	0.581834	0.609	0.564552	0.568088	0.811754	0.81732	0.673159	0.674696	0.634116	0.631359	0.923971	0.955832
0.244	0.704537	0.581866	0.61	0.564586	0.568148	0.811705	0.817315	0.673243	0.674747	0.634151	0.631297	0.923928	0.955891
0.2444	0.704542	0.581887	0.611	0.564598	0.56822	0.811621	0.817314	0.673309	0.674761	0.634259	0.631222	0.923895	0.955879
0.2448	0.70456	0.581936	0.612	0.564676	0.568305	0.811558	0.817271	0.673369	0.674787	0.634349	0.631132	0.923882	0.955862
0.2452	0.704595	0.581973	0.613	0.564746	0.568414	0.811474	0.81721	0.673467	0.674767	0.634414	0.631056	0.923879	0.955864
0.2456	0.704585	0.581974	0.614	0.564841	0.568474	0.811402	0.817076	0.673595	0.674746	0.634409	0.63101	0.923896	0.955836
0.246	0.704625	0.581985	0.615	0.564923	0.56847	0.811303	0.816924	0.673673	0.674704	0.634405	0.630955	0.923893	0.955781
0.2464	0.70467	0.582011	0.616	0.564981	0.568441	0.81123	0.816799	0.673702	0.674682	0.634431	0.630897	0.923909	0.955732
0.2468	0.704687	0.581996	0.617	0.565008	0.568383	0.811256	0.816734	0.67367	0.674659	0.634435	0.63087	0.923949	0.955688
0.2472	0.70474	0.581969	0.618	0.565036	0.568285	0.811294	0.816639	0.673602	0.674621	0.634454	0.630861	0.924003	0.955649
0.2476	0.704759	0.581926	0.619	0.565063	0.568146	0.811354	0.816528	0.6735	0.674582	0.634489	0.630923	0.924064	0.955669
0.248	0.704837	0.58193	0.62	0.565018	0.568011	0.811386	0.816505	0.673382	0.674581	0.634519	0.631024	0.9241	0.955696
0.2484	0.704883	0.581888	0.621	0.564935	0.567888	0.811399	0.816474	0.673261	0.674573	0.634555	0.631132	0.924108	0.955703
0.2488	0.704945	0.581831	0.622	0.564811	0.56777	0.811382	0.816507	0.673181	0.674557	0.634616	0.631217	0.924055	0.955682
0.2492	0.705009	0.581812	0.623	0.564686	0.567693	0.811353	0.816549	0.673133	0.674552	0.63464	0.631269	0.924031	0.955632
0.2496	0.705048	0.581762	0.624	0.564593	0.567609	0.81133	0.816585	0.673114	0.674524	0.634597	0.631324	0.924009	0.955544
0.25	0.705075	0.581712	0.625	0.564479	0.56753	0.811327	0.816606	0.673078	0.67452	0.634518	0.631378	0.924019	0.95545
0.2504	0.705099	0.581637	0.626	0.564435	0.567472	0.811346	0.816679	0.673015	0.674513	0.634459	0.631414	0.92402	0.955404
0.2508	0.705117	0.581596	0.627	0.564351	0.567418	0.811364	0.81681	0.672952	0.674533	0.634386	0.631438	0.924045	0.955385
0.2512	0.705108	0.581576	0.628	0.564332	0.567415	0.811397	0.816921	0.67292	0.674552	0.634357	0.631431	0.924041	0.955396
0.2516	0.705067	0.581526	0.629	0.564314	0.567496	0.811467	0.81705	0.67289	0.674551	0.634287	0.631401	0.924076	0.955484
0.252	0.705045	0.58149	0.63	0.564357	0.567573	0.811589	0.817096	0.672905	0.674532	0.63422	0.631374	0.924073	0.955563
0.2524	0.705004	0.581421	0.631	0.564389	0.567657	0.811683	0.817119	0.672965	0.674527	0.634158	0.631374	0.92399	0.955651
0.2528	0.704984	0.5814	0.632	0.56446	0.567778	0.81173	0.817101	0.673083	0.674536	0.634132	0.631404	0.923862	0.955687
0.2532	0.704995	0.581385	0.633	0.564531	0.567939	0.811762	0.817118	0.673219	0.674533	0.634119	0.631398	0.923767	0.955724
0.2536	0.705007	0.581372	0.634	0.564615	0.568089	0.811763	0.817147	0.673365	0.674493	0.63405	0.631354	0.923733	0.955734
0.254	0.705008	0.581361	0.635	0.564683	0.568219	0.811742	0.817127	0.673465	0.674436	0.63398	0.631294	0.923742	0.955757
0.2544	0.70503	0.581339	0.636	0.564781	0.568314	0.811707	0.817107	0.673517	0.674432	0.633893	0.631212	0.923776	0.955781
0.2548	0.705063	0.581304	0.637	0.564859	0.568365	0.811651	0.817063	0.673557	0.674442	0.633871	0.631157	0.923794	0.955815
0.2552	0.705064	0.58129	0.638	0.564948	0.568382	0.811573	0.817004	0.673565	0.674496	0.633891	0.631065	0.923819	0.955838
0.2556	0.705073	0.581277	0.639	0.565011	0.568367	0.811491	0.816961	0.673568	0.674521	0.633948	0.63091	0.923875	0.955825
0.256	0.705053	0.581258	0.64	0.565064	0.568369	0.811429	0.816879	0.673573	0.674542	0.634018	0.63078	0.923948	0.955804
0.2564	0.705026	0.581214	0.641	0.565101	0.568349	0.811421	0.816783	0.673563	0.674548	0.6341	0.630733	0.923995	0.955739
0.2568	0.704999	0.581201	0.642	0.565101	0.568334	0.81143	0.816632	0.673598	0.67454	0.634175	0.630754	0.924048	0.955637
0.2572	0.704954	0.581147	0.643	0.565079	0.568315	0.81145	0.816528	0.67363	0.674537	0.634264	0.630821	0.924077	0.955587
0.2576	0.704885	0.581083	0.644	0.565028	0.568264	0.811457	0.816463	0.67367	0.674488	0.634353	0.630883	0.924095	0.955565
0.258	0.704832	0.581055	0.645	0.564936	0.568171	0.811418	0.816431	0.673634	0.674461	0.63443	0.630942	0.924111	0.955631
0.2584	0.704805	0.581043	0.646	0.564852	0.568047	0.811348	0.816454	0.673552	0.674418	0.634476	0.631023	0.924152	0.955718
0.2588	0.70476	0.581014	0.647	0.564764	0.56795	0.811267	0.816474	0.673419	0.674416	0.634521	0.631092	0.924158	0.955739
0.2592	0.704754	0.580974	0.648	0.564698	0.567824	0.811185	0.816523	0.673299	0.674464	0.634533	0.631143	0.924132	0.955676
0.2596	0.704716	0.581	0.649	0.564609	0.567747	0.811135	0.816603	0.673187	0.674517	0.634576	0.631178	0.924112	0.955528
0.26	0.704714	0.581013	0.65	0.564522	0.567679	0.811153	0.816722	0.673135	0.674568	0.634597	0.631161	0.924079	0.955411
0.2604	0.704728	0.581009	0.651	0.564466	0.567627	0.811141	0.816862	0.673067	0.674579	0.63456	0.631166	0.924106	0.955375
0.2608	0.704731	0.581044	0.652	0.564439	0.567631	0.811167	0.816965	0.67299	0.674573	0.634502	0.631248	0.924132	0.955411
0.2612	0.704719	0.581064	0.653	0.564417	0.567689	0.81122	0.817062	0.672971	0.674575	0.634416	0.631346	0.924164	0.955495
0.2616	0.704695	0.581103	0.654	0.564399	0.567758	0.811294	0.817094	0.672967	0.674588	0.634353	0.631441	0.924127	0.955549
0.262	0.704693	0.581114	0.655	0.564383	0.567824	0.811364	0.817129	0.673001	0.67461	0.634295	0.631478	0.924026	0.955588
0.2624	0.704645	0.581119	0.656	0.564411	0.5679	0.811434	0.817157	0.673006	0.674607	0.634269	0.631477	0.92393	0.955612
0.2628	0.704649	0.581124	0.657	0.564465	0.567985	0.811498	0.817176	0.673018	0.674587	0.634217	0.63142	0.923823	0.955606
0.2632	0.70461	0.581165	0.658	0.564501	0.568108	0.811531	0.817195	0.673057	0.674556	0.634185	0.631362	0.923703	0.955578
0.2636	0.704598	0.581202	0.659	0.564549	0.568281	0.811605	0.817186	0.673132	0.674552	0.634175	0.631289	0.923588	0.955541
0.264	0.704584	0.5812	0.66	0.564587	0.568391	0.811646	0.817186	0.673295	0.674569	0.634176	0.631168	0.923541	0.955554
0.2644	0.704575	0.581224	0.661	0.564664	0.568439	0.81164	0.817164	0.673467	0.67457	0.634185	0.631046	0.923609	0.955601
0.2648	0.704567	0.581251	0.662	0.564744	0.568472	0.811619	0.817114	0.673606	0.674584	0.634166	0.630916	0.923731	0.955677
0.2652	0.704586	0.581272	0.663	0.564804	0.568529	0.811538	0.817075	0.673685	0.674567	0.634137	0.63085	0.923865	0.955719
0.2656	0.704593	0.581288	0.664	0.564852	0.568581	0.811473	0.816968	0.673725	0.674536	0.634106	0.630787	0.923932	0.955709
0.266	0.704595	0.581327	0.665	0.564892	0.56861	0.811418	0.816788	0.673761	0.674489	0.63409	0.630725	0.923951	0.955621
0.2664	0.704602	0.581394	0.666	0.564908	0.56859	0.8114	0.816644	0.673812	0.67444	0.634108	0.630651	0.923938	0.955544
0.2668	0.704595	0.581371	0.667	0.564897	0.568496	0.811395	0.816557	0.673814	0.674414	0.634098	0.630596	0.92393	0.955512
0.2672	0.704591	0.581409	0.668	0.56492	0.56836	0.811407	0.816493	0.673788	0.674363	0.634153	0.630586	0.923907	0.955523
0.2676	0.704591	0.58143	0.669	0.564944	0.568232	0.811442	0.816421	0.673723	0.67432	0.634178	0.630604	0.923919	0.95554
0.268	0.704601	0.581437	0.67	0.564915	0.568113	0.811463	0.816386	0.67366	0.67428	0.634251	0.630669	0.923931	0.955554
0.2684	0.70457	0.581472	0.671	0.564853	0.567966	0.811466	0.816327	0.6736	0.674261	0.634309	0.630734	0.923981	0.955506
0.2688	0.704542	0.581487	0.672	0.564739	0.567844	0.811408	0.81631	0.673527	0.674254	0.634364	0.630823	0.924017	0.955442
0.2692	0.704538	0.581499	0.673	0.564618	0.567725	0.811294	0.816336	0.673442	0.67426	0.634429	0.630915	0.924076	0.955349
0.2696	0.704542	0.581526	0.674	0.564453	0.567624	0.811185	0.816433	0.673316	0.674285	0.634423	0.630997	0.924085	0.955229
0.27	0.704569	0.581565	0.675	0.564336	0.567553	0.811111	0.816505	0.673165	0.674327	0.6344	0.631083	0.924072	0.95518
0.2704	0.704577	0.581597	0.676	0.564235	0.567525	0.811106	0.816571	0.673064	0.674393	0.634363	0.631131	0.923997	0.955143
0.2708	0.704635	0.581659	0.677	0.564165	0.567486	0.81118	0.816659	0.673026	0.674448	0.634317	0.631148	0.923938	0.955211
0.2712	0.704681	0.581652	0.678	0.564131	0.567458	0.811319	0.816706	0.673004	0.674485	0.634272	0.631149	0.923902	0.955304
0.2716	0.704726	0.581703	0.679	0.564166	0.567464	0.811428	0.816806	0.673001	0.674512	0.634253	0.631172	0.923877	0.955392
0.272	0.704772	0.58169	0.68	0.564225	0.567512	0.811491	0.816904	0.673036	0.674488	0.634215	0.631217	0.923869	0.955463
0.2724	0.704853	0.581716	0.681	0.564245	0.567604	0.811511	0.81697	0.673101	0.674484	0.634172	0.631246	0.923812	0.955502
0.2728	0.704912	0.581727	0.682	0.564282	0.567763	0.811511	0.817011	0.673208	0.674467	0.634146	0.631231	0.92375	0.955507
0.2732	0.704947	0.581719	0.683	0.564298	0.567926	0.811522	0.817036	0.673305	0.674462	0.634146	0.631157	0.923702	0.95549
0.2736	0.704974	0.581721	0.684	0.564333	0.568064	0.811521	0.81708	0.67341	0.674472	0.634126	0.631047	0.923678	0.955525
0.274	0.704982	0.581702	0.685	0.564454	0.568184	0.811517	0.817086	0.673469	0.674481	0.634102	0.630944	0.923678	0.955572
0.2744	0.70501	0.58168	0.686	0.564571	0.568272	0.811478	0.817103	0.673514	0.674517	0.63405	0.630861	0.923701	0.955644
0.2748	0.705056	0.581658	0.687	0.564686	0.568326	0.811436	0.817091	0.673566	0.67456	0.634006	0.630792	0.923728	0.955717
0.2752	0.705082	0.581631	0.688	0.564807	0.568344	0.811426	0.817033	0.673589	0.674616	0.633968	0.630692	0.923732	0.955771
0.2756	0.70511	0.581588	0.689	0.564891	0.5683	0.811405	0.816991	0.673608	0.674629	0.633988	0.630601	0.923735	0.955733
0.276	0.70512	0.581557	0.69	0.564958	0.568236	0.811393	0.816922	0.673619	0.674641	0.634012	0.630543	0.923756	0.955661
0.2764	0.705133	0.581538	0.691	0.565	0.568187	0.811342	0.816839	0.673619	0.674625	0.634058	0.630512	0.92377	0.955549
0.2768	0.705177	0.58149	0.692	0.565006	0.568179	0.811295	0.816722	0.673592	0.674586	0.634167	0.630502	0.923736	0.955445
0.2772	0.705221	0.581478	0.693	0.564983	0.568183	0.811251	0.816639	0.673567	0.674552	0.634267	0.630494	0.923696	0.95537
0.2776	0.705198	0.581444	0.694	0.564912	0.568137	0.811222	0.816555	0.673539	0.67451	0.634351	0.630534	0.923671	0.955347
0.278	0.705206	0.581426	0.695	0.564859	0.568051	0.811189	0.816485	0.673477	0.67448	0.634402	0.630584	0.9237	0.955346
0.2784	0.705184	0.581386	0.696	0.564824	0.567918	0.811149	0.816455	0.673409	0.674448	0.634393	0.630675	0.923777	0.95538
0.2788	0.705161	0.581356	0.697	0.564798	0.56781	0.811095	0.816438	0.673372	0.674449	0.634388	0.630763	0.923844	0.955377
0.2792	0.705122	0.581342	0.698	0.564728	0.567669	0.811029	0.816434	0.673318	0.674462	0.634386	0.630867	0.923869	0.955352
0.2796	0.705069	0.581327	0.699	0.564596	0.567575	0.810974	0.816428	0.673254	0.674469	0.634393	0.63094	0.923888	0.955302
0.28	0.705033	0.581307	0.7	0.564479	0.567498	0.810971	0.816488	0.67317	0.674454	0.634408	0.631008	0.923904	0.955257
0.2804	0.705005	0.58131	0.701	0.564393	0.567457	0.810996	0.816543	0.673039	0.674423	0.634368	0.631043	0.923953	0.955243
0.2808	0.704966	0.581293	0.702	0.564335	0.567476	0.811074	0.816609	0.672933	0.674409	0.634316	0.63113	0.923999	0.955273
0.2812	0.704923	0.581281	0.703	0.564288	0.567525	0.811146	0.816689	0.67285	0.674435	0.634236	0.631216	0.923999	0.955377
0.2816	0.704875	0.581271	0.704	0.564299	0.567636	0.811251	0.816797	0.672829	0.674473	0.634159	0.631268	0.923991	0.95544
0.282	0.704867	0.581253	0.705	0.564301	0.567717	0.811357	0.816916	0.672829	0.674534	0.634122	0.631313	0.923943	0.955483
0.2824	0.704835	0.581227	0.706	0.564356	0.567805	0.811466	0.817023	0.67285	0.67455	0.634067	0.6313	0.923938	0.955478
0.2828	0.704806	0.581228	0.707	0.564412	0.567869	0.81155	0.817081	0.672896	0.674541	0.633997	0.63126	0.923909	0.955432
0.2832	0.704765	0.581213	0.708	0.564432	0.567928	0.811619	0.817108	0.672981	0.674513	0.633939	0.631204	0.923837	0.955401
0.2836	0.704707	0.581188	0.709	0.564441	0.56803	0.811628	0.817124	0.673113	0.674457	0.633904	0.63114	0.923752	0.955361
0.284	0.704655	0.581176	0.71	0.56446	0.568124	0.811601	0.817147	0.673267	0.674398	0.633845	0.631033	0.923712	0.955405
0.2844	0.704622	0.581144	0.711	0.564483	0.568213	0.811595	0.817138	0.673408	0.67433	0.633857	0.630918	0.923681	0.9555
0.2848	0.704588	0.581141	0.712	0.564545	0.568259	0.811557	0.817127	0.673474	0.674278	0.633851	0.630774	0.923702	0.955634
0.2852	0.704555	0.581136	0.713	0.564663	0.568301	0.811538	0.81706	0.673525	0.67424	0.633869	0.630645	0.923732	0.955693
0.2856	0.70449	0.581094	0.714	0.564758	0.568353	0.811521	0.816945	0.673528	0.674242	0.633867	0.630561	0.923732	0.955666
0.286	0.704491	0.581074	0.715	0.564893	0.568371	0.81147	0.816779	0.673538	0.67426	0.633876	0.630498	0.923728	0.955562
0.2864	0.704487	0.581065	0.716	0.565007	0.568379	0.811449	0.816644	0.673551	0.674264	0.633932	0.630487	0.923676	0.955462
0.2868	0.704458	0.581071	0.717	0.565074	0.568332	0.811407	0.816572	0.673566	0.674255	0.633981	0.630499	0.923645	0.955372
0.2872	0.70446	0.581073	0.718	0.565095	0.568247	0.811361	0.8165	0.673556	0.674251	0.63404	0.630559	0.923617	0.955352
0.2876	0.704458	0.581055	0.719	0.565079	0.568194	0.811274	0.816422	0.673531	0.674254	0.63411	0.630635	0.923612	0.955347
0.288	0.704448	0.581048	0.72	0.565041	0.568137	0.811206	0.816362	0.673487	0.674269	0.634146	0.63074	0.923605	0.95539
0.2884	0.704427	0.581082	0.721	0.564994	0.568059	0.811164	0.816315	0.67344	0.674292	0.634191	0.630819	0.923644	0.95538
0.2888	0.704422	0.581102	0.722	0.564871	0.567916	0.811137	0.816313	0.673359	0.674302	0.634219	0.630887	0.923678	0.955315
0.2892	0.704408	0.581134	0.723	0.564766	0.567762	0.811095	0.816351	0.673224	0.674282	0.634275	0.630923	0.923743	0.955255
0.2896	0.7044	0.581159	0.724	0.564664	0.56766	0.811099	0.816406	0.673075	0.674285	0.634289	0.630932	0.923771	0.955197
0.29	0.70436	0.58121	0.725	0.564564	0.567601	0.811114	0.81644	0.672952	0.674286	0.634293	0.630971	0.923812	0.955167
0.2904	0.704364	0.581263	0.726	0.564488	0.567584	0.811159	0.816519	0.672848	0.674313	0.634312	0.631004	0.923849	0.95518
0.2908	0.704364	0.581293	0.727	0.564401	0.567561	0.811207	0.816622	0.67279	0.674342	0.634309	0.631049	0.923858	0.955226
0.2912	0.704367	0.581343	0.728	0.564338	0.56753	0.811285	0.81672	0.672779	0.674358	0.634301	0.631109	0.923848	0.955297
0.2916	0.704363	0.58139	0.729	0.564313	0.567581	0.811332	0.816816	0.67278	0.674416	0.634287	0.631177	0.923784	0.955377
0.292	0.704363	0.581437	0.73	0.56432	0.567701	0.811392	0.816898	0.672826	0.674481	0.634205	0.631241	0.923712	0.955408
0.2924	0.70438	0.581458	0.731	0.564343	0.567848	0.811433	0.816965	0.672914	0.674524	0.634092	0.63127	0.923626	0.955418
0.2928	0.704388	0.581493	0.732	0.564416	0.56797	0.811468	0.817015	0.672998	0.674552	0.634031	0.631284	0.923607	0.955388
0.2932	0.704375	0.581523	0.733	0.56447	0.568047	0.811506	0.817081	0.673094	0.674536	0.633964	0.631277	0.92363	0.955383
0.2936	0.704418	0.581532	0.734	0.564519	0.568074	0.811536	0.81717	0.673195	0.674502	0.633885	0.631203	0.923689	0.9554
0.294	0.704423	0.581576	0.735	0.564566	0.568111	0.811555	0.817203	0.673301	0.674458	0.633828	0.631078	0.923733	0.955442
0.2944	0.704451	0.58159	0.736	0.564627	0.56816	0.811562	0.81719	0.673367	0.674424	0.633737	0.63094	0.923796	0.955492
0.2948	0.704442	0.581612	0.737	0.564668	0.56822	0.811523	0.817152	0.673426	0.674367	0.633709	0.630803	0.92385	0.955514
0.2952	0.704494	0.581647	0.738	0.564693	0.568274	0.81153	0.817049	0.673462	0.674352	0.633696	0.630663	0.923909	0.955474
0.2956	0.70454	0.581657	0.739	0.564749	0.568298	0.811521	0.81695	0.673509	0.674332	0.63375	0.630575	0.923906	0.955415
0.296	0.70457	0.581705	0.74	0.564805	0.568341	0.811534	0.81684	0.673536	0.674348	0.633806	0.630476	0.923875	0.955307
0.2964	0.704598	0.581723	0.741	0.564883	0.568348	0.811527	0.816681	0.673574	0.674364	0.633834	0.630428	0.923801	0.95518
0.2968	0.704669	0.581748	0.742	0.564908	0.568344	0.811495	0.816505	0.673577	0.674374	0.63389	0.630445	0.923722	0.955049
0.2972	0.704724	0.581753	0.743	0.564879	0.568266	0.81146	0.816398	0.673565	0.674379	0.633972	0.63047	0.923708	0.954956
0.2976	0.70477	0.581743	0.744	0.564834	0.568156	0.81139	0.816327	0.673547	0.674349	0.634051	0.630521	0.923724	0.954908
0.298	0.704839	0.581764	0.745	0.564807	0.568049	0.811346	0.8163	0.67353	0.674304	0.634148	0.630562	0.923794	0.954933
0.2984	0.704886	0.581749	0.746	0.564728	0.567952	0.811268	0.816307	0.673525	0.674251	0.63418	0.630584	0.923904	0.95503
0.2988	0.704959	0.581747	0.747	0.564616	0.567878	0.811176	0.816292	0.673549	0.674214	0.634173	0.630597	0.923965	0.955078
0.2992	0.705025	0.581729	0.748	0.564478	0.567775	0.811061	0.816297	0.673518	0.674182	0.634182	0.630647	0.923927	0.955117
0.2996	0.705025	0.581743	0.749	0.564383	0.567669	0.810989	0.816341	0.673445	0.67418	0.634196	0.63071	0.92388	0.955082
0.3	0.70505	0.581731	0.75	0.564345	0.56758	0.81098	0.816435	0.673309	0.674195	0.634215	0.630785	0.92383	0.955038
0.3004	0.705047	0.581702	0.751	0.564365	0.567504	0.81106	0.816518	0.673179	0.674225	0.634215	0.630833	0.923799	0.955022
0.3008	0.705031	0.581704	0.752	0.564389	0.567485	0.811157	0.816572	0.673052	0.674227	0.634182	0.630876	0.923787	0.955007
0.3012	0.705055	0.581664	0.753	0.564384	0.567493	0.811252	0.816659	0.672953	0.674249	0.634089	0.630917	0.923723	0.955046
0.3016	0.705009	0.581627	0.754	0.564366	0.567491	0.811329	0.816756	0.672942	0.674243	0.634026	0.63097	0.923652	0.955077
0.302	0.704969	0.581611	0.755	0.564347	0.567507	0.811384	0.816869	0.672979	0.674274	0.633995	0.631011	0.923575	0.955108
0.3024	0.704945	0.581542	0.756	0.564385	0.567581	0.811378	0.816966	0.673073	0.674272	0.634008	0.630999	0.92354	0.955133
0.3028	0.704935	0.581529	0.757	0.564416	0.567686	0.811383	0.817027	0.673201	0.674272	0.634004	0.630963	0.923504	0.955174
0.3032	0.704923	0.581485	0.758	0.564451	0.567796	0.811335	0.817014	0.673328	0.674268	0.633969	0.630939	0.923438	0.955187
0.3036	0.704916	0.581438	0.759	0.564496	0.567903	0.811319	0.817007	0.673447	0.674268	0.633939	0.630896	0.923389	0.955204
0.304	0.704912	0.581404	0.76	0.564559	0.567991	0.811304	0.817037	0.673502	0.674281	0.633923	0.630822	0.923387	0.955253
0.3044	0.704896	0.581402	0.761	0.5646	0.568087	0.811335	0.817026	0.673558	0.674275	0.63391	0.630766	0.923439	0.95533
0.3048	0.704884	0.581379	0.762	0.564662	0.568181	0.81138	0.817013	0.673557	0.674271	0.633898	0.63063	0.923516	0.955435
0.3052	0.704836	0.58135	0.763	0.564728	0.56828	0.811418	0.816987	0.673576	0.674237	0.633922	0.630491	0.923605	0.955522
0.3056	0.704825	0.581344	0.764	0.564759	0.568331	0.811443	0.816931	0.673626	0.674209	0.633932	0.630349	0.923632	0.955568
0.306	0.704784	0.58134	0.765	0.564817	0.568346	0.811427	0.816833	0.673706	0.674209	0.633942	0.630288	0.92365	0.955524
0.3064	0.704749	0.581341	0.766	0.564844	0.568383	0.811347	0.81671	0.673793	0.674241	0.633964	0.630256	0.923635	0.955411
0.3068	0.704694	0.581336	0.767	0.564885	0.568387	0.811277	0.816607	0.673835	0.674259	0.633987	0.630264	0.923675	0.955301
0.3072	0.704669	0.581324	0.768	0.564904	0.568374	0.811212	0.816502	0.673876	0.674256	0.633999	0.63029	0.923747	0.955246
0.3076	0.704641	0.581289	0.769	0.56492	0.568334	0.811167	0.816437	0.673874	0.674248	0.63405	0.630353	0.9238	0.955261
0.308	0.70463	0.581306	0.77	0.564885	0.568264	0.811124	0.816397	0.673836	0.67427	0.634069	0.630415	0.923833	0.955333
0.3084	0.704608	0.581307	0.771	0.564809	0.568202	0.811111	0.816323	0.673765	0.67428	0.634112	0.630484	0.923897	0.955354
0.3088	0.704592	0.581315	0.772	0.564693	0.568082	0.811086	0.816304	0.673643	0.674314	0.634172	0.630583	0.923949	0.955313
0.3092	0.704623	0.581319	0.773	0.564571	0.568005	0.811089	0.816312	0.673506	0.674331	0.634243	0.630628	0.924019	0.955238
0.3096	0.704582	0.581309	0.774	0.564449	0.567895	0.811093	0.816339	0.673364	0.674346	0.634282	0.63065	0.924033	0.955104
0.31	0.704584	0.581303	0.775	0.564331	0.567785	0.811084	0.816336	0.673218	0.674364	0.634331	0.630707	0.924021	0.955002
0.3104	0.704592	0.581314	0.776	0.564225	0.567684	0.811106	0.816415	0.673056	0.674379	0.634344	0.630771	0.923991	0.954949
0.3108	0.704567	0.581295	0.777	0.564134	0.567593	0.811128	0.816547	0.672953	0.6744	0.6343	0.630833	0.923965	0.954967
0.3112	0.7045	0.5813	0.778	0.564073	0.567503	0.811184	0.816675	0.672906	0.674397	0.634234	0.630912	0.923945	0.955012
0.3116	0.704482	0.581264	0.779	0.564042	0.567508	0.811234	0.816771	0.672914	0.674395	0.634171	0.630978	0.923901	0.955094
0.312	0.704435	0.581246	0.78	0.564035	0.567556	0.811287	0.816841	0.672971	0.674378	0.634104	0.630989	0.923805	0.955111
0.3124	0.704373	0.581233	0.781	0.564032	0.567642	0.811353	0.816843	0.673054	0.67437	0.634016	0.631008	0.923675	0.955071
0.3128	0.704313	0.58122	0.782	0.564092	0.567753	0.811339	0.816822	0.67312	0.674361	0.633928	0.631028	0.92355	0.955046
0.3132	0.70431	0.581215	0.783	0.564188	0.567851	0.811357	0.816862	0.673218	0.674367	0.633835	0.631012	0.923493	0.955032
0.3136	0.704242	0.581203	0.784	0.564285	0.567932	0.811319	0.816884	0.673302	0.674364	0.633767	0.630927	0.923447	0.955064
0.314	0.704227	0.581178	0.785	0.564387	0.568013	0.811288	0.816952	0.673372	0.674376	0.63375	0.630817	0.923465	0.955152
0.3144	0.704165	0.58117	0.786	0.564478	0.56811	0.811305	0.817017	0.673378	0.674387	0.633725	0.630715	0.923477	0.955257
0.3148	0.704159	0.581183	0.787	0.564566	0.568202	0.81133	0.817085	0.673361	0.674366	0.633752	0.630633	0.923448	0.955315
0.3152	0.704153	0.581193	0.788	0.564612	0.568286	0.811367	0.81706	0.673318	0.674337	0.633791	0.630567	0.92344	0.955308
0.3156	0.704157	0.581205	0.789	0.564669	0.568334	0.811388	0.816994	0.67332	0.674298	0.633799	0.630494	0.923414	0.955267
0.316	0.704135	0.581264	0.79	0.564709	0.568361	0.811398	0.816873	0.673346	0.674268	0.633839	0.630437	0.923389	0.955199
0.3164	0.704144	0.58129	0.791	0.564758	0.568346	0.811352	0.816739	0.673404	0.674241	0.633857	0.630364	0.92336	0.955112
0.3168	0.704137	0.581334	0.792	0.564798	0.568322	0.81128	0.816557	0.673429	0.674238	0.633907	0.630341	0.923327	0.955021
0.3172	0.704131	0.581386	0.793	0.564858	0.568262	0.811213	0.816458	0.673439	0.674258	0.63392	0.630336	0.923309	0.954977
0.3176	0.704148	0.581438	0.794	0.564852	0.568133	0.81114	0.816402	0.673473	0.674278	0.633953	0.630333	0.923347	0.954964
0.318	0.704197	0.581497	0.795	0.564856	0.568039	0.811105	0.816348	0.673428	0.674278	0.633969	0.630364	0.923392	0.954961
0.3184	0.704198	0.581541	0.796	0.564828	0.567915	0.811059	0.816307	0.673418	0.674269	0.634023	0.630423	0.923454	0.954994
0.3188	0.704204	0.581604	0.797	0.564787	0.567837	0.811003	0.816286	0.673366	0.674256	0.634055	0.630484	0.9235	0.954996
0.3192	0.704227	0.581631	0.798	0.564738	0.567769	0.810951	0.816305	0.673311	0.67424	0.63406	0.630574	0.923545	0.955008
0.3196	0.704258	0.581694	0.799	0.564651	0.567707	0.810906	0.816333	0.673228	0.674238	0.634067	0.630669	0.923566	0.955
0.32	0.704318	0.581727	0.8	0.564577	0.567616	0.810909	0.816414	0.673166	0.674232	0.634088	0.630723	0.923583	0.955003
0.3204	0.704351	0.581747	0.801	0.564499	0.567499	0.81094	0.816465	0.673089	0.674217	0.634095	0.63078	0.923618	0.954992
0.3208	0.70441	0.581761	0.802	0.564465	0.56742	0.81098	0.816501	0.672994	0.67422	0.634092	0.630845	0.923649	0.954983
0.3212	0.704449	0.581758	0.803	0.564426	0.567375	0.811052	0.816587	0.672908	0.674242	0.634049	0.630898	0.923659	0.955021
0.3216	0.704483	0.581773	0.804	0.564399	0.567385	0.81113	0.816684	0.67286	0.674279	0.633975	0.630968	0.923647	0.955059
0.322	0.704492	0.581758	0.805	0.564385	0.56743	0.811225	0.816788	0.672868	0.674316	0.633865	0.631022	0.923612	0.955091
0.3224	0.70454	0.581771	0.806	0.564368	0.567518	0.811305	0.816871	0.672898	0.674337	0.633758	0.631034	0.923585	0.955099
0.3228	0.704573	0.581786	0.807	0.564368	0.567614	0.811356	0.816943	0.672958	0.67433	0.633679	0.630998	0.923534	0.955095
0.3232	0.704591	0.581781	0.808	0.564375	0.56774	0.811387	0.816978	0.672991	0.67432	0.633626	0.630966	0.923502	0.95507
0.3236	0.704628	0.581794	0.809	0.564414	0.567886	0.811399	0.817015	0.673048	0.674322	0.633638	0.630934	0.923475	0.955062
0.324	0.704669	0.581794	0.81	0.564457	0.567981	0.811418	0.817088	0.673128	0.674328	0.633684	0.630868	0.923521	0.955108
0.3244	0.704683	0.581784	0.811	0.564545	0.568039	0.811428	0.81711	0.673212	0.674282	0.633743	0.630814	0.923572	0.955186
0.3248	0.704732	0.581789	0.812	0.564608	0.568108	0.811454	0.817114	0.673264	0.674242	0.633772	0.630724	0.923616	0.955254
0.3252	0.704768	0.581794	0.813	0.564696	0.568151	0.811447	0.817065	0.673305	0.67419	0.633807	0.630655	0.923657	0.955307
0.3256	0.704798	0.581751	0.814	0.564722	0.568203	0.811458	0.817	0.673355	0.67418	0.63378	0.630608	0.923647	0.955313
0.326	0.704868	0.581693	0.815	0.56476	0.568232	0.811473	0.816911	0.673442	0.674186	0.633754	0.630533	0.923614	0.955283
0.3264	0.70492	0.581673	0.816	0.564775	0.568248	0.811444	0.816815	0.673574	0.674214	0.633714	0.630433	0.923572	0.955229
0.3268	0.704974	0.581638	0.817	0.564826	0.568253	0.811395	0.816695	0.673696	0.674234	0.633697	0.630314	0.923565	0.955155
0.3272	0.705035	0.581616	0.818	0.564937	0.568246	0.811314	0.816555	0.673754	0.674234	0.633734	0.63026	0.923582	0.955095
0.3276	0.70506	0.581573	0.819	0.565017	0.568202	0.811237	0.816428	0.67372	0.674233	0.633787	0.630251	0.923586	0.955042
0.328	0.705098	0.581541	0.82	0.565036	0.568123	0.811162	0.816379	0.673679	0.674222	0.633838	0.630333	0.923634	0.955007
0.3284	0.705086	0.581511	0.821	0.564973	0.56801	0.811118	0.816347	0.67364	0.674213	0.633869	0.630407	0.923668	0.955005
0.3288	0.705092	0.58144	0.822	0.564871	0.567917	0.811071	0.816361	0.673579	0.674222	0.633941	0.630471	0.923663	0.954952
0.3292	0.705075	0.581412	0.823	0.564763	0.567851	0.811066	0.816351	0.673462	0.674215	0.63401	0.630487	0.923658	0.954866
0.3296	0.705064	0.581369	0.824	0.564647	0.567785	0.81107	0.816314	0.673297	0.67423	0.634068	0.630512	0.9236	0.954755
0.33	0.705037	0.581342	0.825	0.564506	0.567723	0.811053	0.816316	0.673142	0.674252	0.63412	0.630569	0.923531	0.954672
0.3304	0.705018	0.581274	0.826	0.564392	0.567665	0.811029	0.816363	0.673023	0.674264	0.634143	0.630616	0.92346	0.954627
0.3308	0.705005	0.581215	0.827	0.564266	0.567609	0.811026	0.816475	0.672976	0.67428	0.634113	0.630648	0.923449	0.954616
0.3312	0.704964	0.581156	0.828	0.564226	0.567588	0.811029	0.816555	0.672934	0.674245	0.634088	0.630695	0.923475	0.954654
0.3316	0.704949	0.581101	0.829	0.564255	0.567585	0.811086	0.816637	0.672922	0.674239	0.634054	0.630733	0.923485	0.954705
0.332	0.704929	0.581059	0.83	0.564323	0.567615	0.81114	0.81667	0.672913	0.67422	0.634016	0.630783	0.923477	0.954813
0.3324	0.704886	0.581048	0.831	0.56437	0.567657	0.811167	0.816727	0.672939	0.674204	0.633921	0.630831	0.923433	0.954892
0.3328	0.70488	0.581016	0.832	0.564399	0.567753	0.811194	0.816774	0.673004	0.674186	0.633841	0.630862	0.923382	0.954923
0.3332	0.704828	0.581025	0.833	0.564428	0.567897	0.811226	0.816872	0.673069	0.674187	0.633752	0.63083	0.923335	0.95495
0.3336	0.704767	0.580986	0.834	0.564463	0.568017	0.811275	0.81698	0.673138	0.674173	0.633679	0.630757	0.923319	0.954996
0.334	0.70472	0.580991	0.835	0.564529	0.568154	0.811296	0.817039	0.673206	0.67414	0.633638	0.630681	0.923337	0.955054
0.3344	0.704678	0.580962	0.836	0.564606	0.568289	0.811342	0.817096	0.673288	0.674133	0.63361	0.630628	0.923355	0.955154
0.3348	0.704637	0.580958	0.837	0.564702	0.568354	0.81138	0.817117	0.673369	0.674101	0.633592	0.63058	0.923404	0.955201
0.3352	0.704592	0.580951	0.838	0.564794	0.568394	0.811419	0.817096	0.673453	0.674126	0.633587	0.630519	0.923442	0.955218
0.3356	0.704558	0.580927	0.839	0.564895	0.568414	0.811412	0.81703	0.673524	0.674129	0.633612	0.630466	0.923468	0.955143
0.336	0.704538	0.58091	0.84	0.564951	0.568412	0.811418	0.816946	0.673586	0.674138	0.633649	0.630377	0.923527	0.955082
0.3364	0.704532	0.58089	0.841	0.564977	0.568384	0.811382	0.816825	0.673629	0.67415	0.633676	0.630334	0.923544	0.955022
0.3368	0.704528	0.58089	0.842	0.56496	0.568373	0.811326	0.816691	0.673654	0.674176	0.633699	0.63033	0.923508	0.954961
0.3372	0.704497	0.580919	0.843	0.564922	0.568337	0.811276	0.81662	0.673665	0.674217	0.63373	0.630253	0.923472	0.954908
0.3376	0.704504	0.580912	0.844	0.564873	0.568276	0.811204	0.81656	0.673708	0.674237	0.633799	0.630203	0.92349	0.954883
0.338	0.704481	0.580914	0.845	0.564848	0.568195	0.811149	0.816464	0.673721	0.674248	0.633885	0.630197	0.923562	0.954881
0.3384	0.704486	0.580936	0.846	0.564822	0.568083	0.811102	0.816332	0.673706	0.674236	0.63396	0.63025	0.923647	0.95491
0.3388	0.704435	0.580932	0.847	0.564778	0.567994	0.811117	0.816232	0.673655	0.674198	0.634036	0.630315	0.923719	0.954962
0.3392	0.704418	0.580997	0.848	0.564703	0.56792	0.811114	0.816151	0.673557	0.67415	0.634062	0.630409	0.92374	0.954941
0.3396	0.704405	0.581023	0.849	0.564621	0.567886	0.811092	0.816149	0.67346	0.674101	0.634099	0.630492	0.923733	0.954866
0.34	0.70438	0.581039	0.85	0.564536	0.567819	0.811052	0.81625	0.673333	0.674106	0.634108	0.630525	0.923701	0.95478
0.3404	0.704348	0.581064	0.851	0.564419	0.567716	0.811003	0.816323	0.673244	0.674118	0.634117	0.63055	0.923653	0.954737
0.3408	0.704318	0.581107	0.852	0.564344	0.567635	0.810968	0.816389	0.673159	0.674135	0.634078	0.630603	0.923592	0.954749
0.3412	0.704296	0.581146	0.853	0.564251	0.567541	0.810997	0.816479	0.673105	0.674163	0.633975	0.63065	0.923562	0.95482
0.3416	0.704289	0.581204	0.854	0.564231	0.567478	0.811054	0.816572	0.673088	0.674171	0.633885	0.630684	0.923526	0.954893
0.342	0.70427	0.581231	0.855	0.564217	0.567466	0.811118	0.816637	0.673036	0.674199	0.633817	0.630725	0.923507	0.95491
0.3424	0.704277	0.581259	0.856	0.564224	0.567477	0.811173	0.816705	0.673063	0.674207	0.633745	0.630783	0.923538	0.954887
0.3428	0.704328	0.581319	0.857	0.564237	0.567524	0.811225	0.816759	0.673101	0.674216	0.633686	0.630807	0.923554	0.954861
0.3432	0.704292	0.581367	0.858	0.564272	0.567583	0.811265	0.816819	0.673141	0.674209	0.633689	0.630789	0.923546	0.95478
0.3436	0.704343	0.581402	0.859	0.564331	0.567688	0.811347	0.81688	0.67319	0.674191	0.633711	0.630719	0.9235	0.954742
0.344	0.704401	0.581461	0.86	0.564382	0.567821	0.811391	0.816943	0.673235	0.674186	0.633746	0.630592	0.923434	0.954771
0.3444	0.704386	0.581471	0.861	0.564435	0.567925	0.811413	0.816983	0.673281	0.674173	0.633772	0.630451	0.923363	0.954847
0.3448	0.704429	0.581492	0.862	0.564461	0.568037	0.811412	0.81697	0.673333	0.674209	0.633787	0.630334	0.923308	0.954957
0.3452	0.704444	0.581523	0.863	0.56452	0.568113	0.811367	0.816935	0.673384	0.674198	0.633762	0.630241	0.923315	0.955015
0.3456	0.704496	0.581536	0.864	0.564574	0.568145	0.811353	0.816854	0.673491	0.674197	0.633698	0.630183	0.923315	0.955047
0.346	0.704523	0.581556	0.865	0.564662	0.568142	0.811302	0.816786	0.673609	0.674169	0.633641	0.630119	0.923301	0.955017
0.3464	0.704592	0.581591	0.866	0.564727	0.568133	0.811273	0.816714	0.673705	0.674182	0.633632	0.63007	0.923313	0.954972
0.3468	0.704639	0.581618	0.867	0.564782	0.568107	0.811248	0.816677	0.673806	0.674197	0.633657	0.630013	0.923346	0.954913
0.3472	0.704689	0.581614	0.868	0.564795	0.568081	0.811198	0.816592	0.673853	0.674199	0.633745	0.629976	0.923386	0.954858
0.3476	0.704759	0.581627	0.869	0.56481	0.56807	0.811164	0.816505	0.673875	0.674184	0.633819	0.629928	0.923444	0.95484
0.348	0.704834	0.581618	0.87	0.564774	0.568056	0.81111	0.81645	0.673878	0.674155	0.633877	0.629923	0.923476	0.954872
0.3484	0.704911	0.581636	0.871	0.564755	0.568053	0.811045	0.816384	0.673848	0.674123	0.63393	0.629929	0.923496	0.954874
0.3488	0.704984	0.581621	0.872	0.564682	0.568024	0.810994	0.816344	0.673743	0.674113	0.633957	0.630017	0.923535	0.954849
0.3492	0.705049	0.581618	0.873	0.564626	0.567965	0.810968	0.816313	0.673611	0.67411	0.634026	0.630089	0.923558	0.954798
0.3496	0.705075	0.581601	0.874	0.564557	0.567844	0.810968	0.816286	0.673473	0.674111	0.634022	0.630183	0.923558	0.954683
0.35	0.705102	0.581579	0.875	0.564497	0.567738	0.81097	0.81628	0.67335	0.67412	0.63402	0.630291	0.923552	0.954566
0.3504	0.705125	0.581533	0.876	0.564457	0.567634	0.810978	0.816317	0.673218	0.674131	0.633989	0.630375	0.923543	0.954531
0.3508	0.705079	0.581538	0.877	0.564364	0.567588	0.811002	0.816416	0.673116	0.67416	0.633942	0.63044	0.923529	0.954557
0.3512	0.705079	0.581477	0.878	0.564287	0.567564	0.811043	0.816486	0.673044	0.674194	0.633897	0.630507	0.923515	0.95467
0.3516	0.705077	0.581476	0.879	0.564239	0.567555	0.811076	0.816584	0.672975	0.674213	0.633856	0.630578	0.923494	0.954797
0.352	0.705027	0.581457	0.88	0.564221	0.567566	0.811083	0.816648	0.672978	0.674206	0.633804	0.630639	0.92345	0.954904
0.3524	0.704977	0.581416	0.881	0.56425	0.56759	0.81105	0.816705	0.67303	0.674214	0.633742	0.63071	0.92337	0.954935
0.3528	0.704971	0.581367	0.882	0.564339	0.567637	0.811026	0.816741	0.673089	0.674198	0.633681	0.630751	0.923327	0.954925
0.3532	0.704953	0.581336	0.883	0.564406	0.56772	0.811066	0.816787	0.673155	0.674187	0.633629	0.630751	0.923349	0.954894
0.3536	0.704931	0.581306	0.884	0.564448	0.567777	0.811131	0.816851	0.673219	0.674168	0.633588	0.630718	0.923405	0.954908
0.354	0.704893	0.58127	0.885	0.56447	0.567839	0.811216	0.816906	0.673253	0.674154	0.633579	0.630652	0.923412	0.954931
0.3544	0.704907	0.581226	0.886	0.564467	0.567901	0.811258	0.816971	0.673248	0.674149	0.633568	0.630565	0.923398	0.955006
0.3548	0.704894	0.581182	0.887	0.56448	0.56797	0.811307	0.817043	0.673262	0.67413	0.633532	0.630437	0.923344	0.955037
0.3552	0.704852	0.581123	0.888	0.564483	0.568005	0.811345	0.817032	0.673291	0.674148	0.633503	0.630309	0.923277	0.955063
0.3556	0.704848	0.581078	0.889	0.564505	0.568051	0.811364	0.816984	0.673346	0.67416	0.633516	0.630178	0.92325	0.955054
0.356	0.704843	0.581043	0.89	0.564573	0.56812	0.811391	0.816887	0.673411	0.67418	0.633515	0.630097	0.923217	0.954981
0.3564	0.704833	0.581005	0.891	0.564654	0.568152	0.811357	0.816772	0.673471	0.67418	0.633505	0.630067	0.923179	0.954892
0.3568	0.704785	0.580981	0.892	0.564766	0.568175	0.811289	0.816632	0.673546	0.674198	0.633543	0.630088	0.923187	0.954762
0.3572	0.704747	0.580954	0.893	0.564854	0.568145	0.811256	0.816536	0.673596	0.674218	0.633567	0.630096	0.923225	0.954696
0.3576	0.704746	0.580944	0.894	0.564877	0.568127	0.811197	0.816493	0.673639	0.674235	0.633669	0.630074	0.923286	0.954696
0.358	0.704743	0.580939	0.895	0.564816	0.568085	0.811175	0.816423	0.673625	0.674249	0.633789	0.630018	0.923343	0.954716
0.3584	0.704752	0.580943	0.896	0.564689	0.568049	0.811107	0.816402	0.673576	0.674203	0.633918	0.629963	0.923378	0.954757
0.3588	0.704745	0.580953	0.897	0.564572	0.568008	0.811029	0.816295	0.67349	0.674161	0.634008	0.629963	0.923394	0.954711
0.3592	0.70474	0.580944	0.898	0.564473	0.567966	0.810943	0.816166	0.673358	0.674135	0.634047	0.630021	0.923375	0.954645
0.3596	0.704751	0.58096	0.899	0.564405	0.567881	0.810869	0.816035	0.673207	0.674108	0.634061	0.630134	0.923397	0.954579
0.36	0.704752	0.580959	0.9	0.564387	0.567789	0.81085	0.816011	0.673066	0.674109	0.634036	0.630238	0.923428	0.954535
0.3604	0.704757	0.580962	0.901	0.56441	0.567682	0.81084	0.81606	0.672972	0.674104	0.633989	0.63036	0.923476	0.954552
0.3608	0.704758	0.580964	0.902	0.564454	0.567613	0.810878	0.816158	0.672892	0.674112	0.633887	0.630477	0.923495	0.95459
0.3612	0.704722	0.580978	0.903	0.564487	0.567556	0.810905	0.816332	0.672877	0.67413	0.633779	0.630576	0.923502	0.954668
0.3616	0.704706	0.580951	0.904	0.564508	0.567512	0.810948	0.816485	0.672883	0.674158	0.633699	0.630619	0.923512	0.954728
0.362	0.704675	0.580954	0.905	0.56447	0.567458	0.810972	0.816609	0.672893	0.674186	0.633688	0.630621	0.923491	0.954758
0.3624	0.704616	0.580972	0.906	0.564413	0.567456	0.811002	0.816712	0.672913	0.674193	0.633725	0.630583	0.923473	0.954731
0.3628	0.704588	0.581004	0.907	0.564338	0.567517	0.811067	0.816796	0.672915	0.674183	0.633699	0.630532	0.923437	0.954692
0.3632	0.704541	0.581029	0.908	0.564302	0.567636	0.811078	0.816843	0.672946	0.674124	0.633629	0.630511	0.923392	0.954639
0.3636	0.704501	0.581016	0.909	0.564346	0.567789	0.811128	0.816888	0.672992	0.674074	0.633564	0.630532	0.923356	0.954607
0.364	0.704464	0.581063	0.91	0.564384	0.567883	0.811215	0.816988	0.673034	0.67408	0.633514	0.630501	0.92337	0.954649
0.3644	0.704435	0.581093	0.911	0.564412	0.567911	0.811311	0.817074	0.673068	0.674077	0.633505	0.630446	0.92338	0.954722
0.3648	0.704405	0.581099	0.912	0.564454	0.567939	0.811421	0.817139	0.67308	0.6741	0.633518	0.630359	0.92338	0.954832
0.3652	0.704425	0.581127	0.913	0.564526	0.567987	0.811499	0.817164	0.673149	0.674106	0.633483	0.630259	0.923374	0.954886
0.3656	0.704387	0.581162	0.914	0.564583	0.568051	0.811534	0.817108	0.673226	0.674085	0.633454	0.63018	0.923279	0.954909
0.366	0.704378	0.581179	0.915	0.564673	0.568133	0.811466	0.816997	0.673365	0.674063	0.633444	0.630071	0.92319	0.954886
0.3664	0.704351	0.581196	0.916	0.564734	0.568192	0.811395	0.816865	0.673471	0.674065	0.633469	0.629971	0.923152	0.954897
0.3668	0.704323	0.581222	0.917	0.564803	0.56822	0.811314	0.816779	0.673567	0.674081	0.633474	0.629874	0.923163	0.954901
0.3672	0.704323	0.581269	0.918	0.564878	0.568248	0.811254	0.816654	0.673662	0.674079	0.633475	0.629839	0.923242	0.954872
0.3676	0.704287	0.58129	0.919	0.564925	0.568288	0.811202	0.816589	0.673748	0.67407	0.633475	0.629875	0.923362	0.954841
0.368	0.70428	0.581332	0.92	0.564931	0.568232	0.811157	0.81649	0.673778	0.674048	0.633507	0.629949	0.923482	0.954803
0.3684	0.704294	0.581409	0.921	0.564899	0.568144	0.811126	0.816389	0.673773	0.674062	0.633602	0.630025	0.923579	0.954772
0.3688	0.704266	0.581427	0.922	0.564812	0.567996	0.81111	0.816318	0.673705	0.674051	0.633678	0.63011	0.923615	0.954772
0.3692	0.704265	0.581441	0.923	0.564687	0.567856	0.811091	0.816279	0.673625	0.674039	0.633738	0.630194	0.923614	0.954714
0.3696	0.704299	0.581526	0.924	0.564572	0.567731	0.811065	0.816253	0.673519	0.674027	0.633738	0.630276	0.923531	0.954651
0.37	0.704328	0.581565	0.925	0.564457	0.56765	0.810979	0.816251	0.673445	0.674004	0.633753	0.630397	0.923427	0.95457
0.3704	0.704379	0.581604	0.926	0.564407	0.567538	0.810951	0.816283	0.673363	0.673995	0.633754	0.630483	0.923369	0.954532
0.3708	0.704415	0.58165	0.927	0.564353	0.567441	0.81093	0.816341	0.673293	0.673999	0.63374	0.63056	0.923376	0.954531
0.3712	0.704488	0.581665	0.928	0.564372	0.567357	0.810958	0.816388	0.673216	0.674018	0.633699	0.630597	0.923415	0.954542
0.3716	0.704553	0.58166	0.929	0.564385	0.567341	0.811002	0.816462	0.673143	0.674022	0.633659	0.630627	0.923469	0.954582
0.372	0.704607	0.581673	0.93	0.564408	0.567353	0.811049	0.816542	0.673094	0.67401	0.63361	0.630619	0.923534	0.954601
0.3724	0.70466	0.581694	0.931	0.564394	0.56737	0.811064	0.816615	0.673088	0.674013	0.633554	0.630625	0.923476	0.954645
0.3728	0.704715	0.581687	0.932	0.564366	0.567431	0.811042	0.816649	0.673114	0.674008	0.633549	0.630596	0.923419	0.9547
0.3732	0.704744	0.581702	0.933	0.564321	0.5675	0.811042	0.816697	0.673154	0.67402	0.633526	0.630538	0.923367	0.954727
0.3736	0.704767	0.581687	0.934	0.564253	0.567569	0.81107	0.816769	0.673186	0.673985	0.633491	0.630485	0.923313	0.954735
0.374	0.7048	0.581669	0.935	0.564248	0.5677	0.811106	0.816835	0.67318	0.673966	0.633457	0.630438	0.923268	0.954759
0.3744	0.704809	0.581639	0.936	0.564285	0.567839	0.811151	0.816913	0.673203	0.673961	0.633399	0.630376	0.923244	0.954784
0.3748	0.704805	0.581609	0.937	0.56438	0.567943	0.811188	0.816959	0.67326	0.673948	0.633342	0.630332	0.923236	0.954854
0.3752	0.704815	0.581594	0.938	0.564484	0.568041	0.811218	0.816935	0.673356	0.673962	0.633329	0.630255	0.923234	0.954892
0.3756	0.704861	0.581556	0.939	0.564617	0.568095	0.811229	0.816897	0.673444	0.673987	0.633347	0.630146	0.923235	0.954864
0.376	0.704866	0.58152	0.94	0.564697	0.568133	0.811227	0.816831	0.673514	0.674002	0.633382	0.630019	0.923263	0.954801
0.3764	0.70488	0.581509	0.941	0.564748	0.568148	0.811171	0.816738	0.673605	0.674008	0.633453	0.62992	0.923227	0.954703
0.3768	0.704897	0.581481	0.942	0.564764	0.568171	0.811106	0.81658	0.673703	0.674027	0.633516	0.629846	0.923215	0.954602
0.3772	0.704946	0.581469	0.943	0.564785	0.568193	0.811052	0.816443	0.673815	0.674051	0.633595	0.629803	0.923228	0.954519
0.3776	0.704964	0.581483	0.944	0.564772	0.568211	0.811034	0.816369	0.673889	0.67405	0.633667	0.629759	0.923269	0.954509
0.378	0.70494	0.581431	0.945	0.564756	0.568231	0.811003	0.816264	0.673921	0.674027	0.633735	0.629716	0.923365	0.95455
0.3784	0.704977	0.58144	0.946	0.564734	0.568215	0.810975	0.81619	0.673899	0.673989	0.633794	0.62975	0.92342	0.954606
0.3788	0.704974	0.581429	0.947	0.564691	0.568169	0.810938	0.816087	0.673819	0.67396	0.633845	0.629775	0.923431	0.95467
0.3792	0.704976	0.581402	0.948	0.564625	0.568063	0.810891	0.81598	0.673728	0.673969	0.633883	0.629859	0.923402	0.954659
0.3796	0.704973	0.581393	0.949	0.564575	0.567932	0.810867	0.815932	0.673621	0.673997	0.633956	0.629956	0.923395	0.954598
0.38	0.704954	0.581397	0.95	0.564504	0.567813	0.810899	0.815987	0.673525	0.67401	0.633982	0.630004	0.923385	0.954535
0.3804	0.704974	0.581332	0.951	0.564442	0.567687	0.810922	0.816085	0.673426	0.674015	0.633962	0.630068	0.923416	0.954487
0.3808	0.704962	0.581303	0.952	0.564378	0.56759	0.810967	0.816169	0.673318	0.674018	0.633912	0.630148	0.923434	0.954545
0.3812	0.704921	0.581262	0.953	0.564362	0.567507	0.810959	0.816305	0.673214	0.674047	0.633825	0.630214	0.923474	0.954604
0.3816	0.704933	0.581199	0.954	0.564359	0.567453	0.810978	0.8164	0.673157	0.674074	0.633763	0.630244	0.92348	0.954631
0.382	0.704884	0.581144	0.955	0.564343	0.567448	0.810996	0.816502	0.673152	0.674094	0.633739	0.630228	0.92347	0.954577
0.3824	0.704887	0.581108	0.956	0.564341	0.567517	0.811035	0.816618	0.673145	0.674094	0.63377	0.63017	0.923479	0.954485
0.3828	0.704882	0.581048	0.957	0.564312	0.567582	0.811076	0.816749	0.67311	0.674074	0.633755	0.630145	0.923469	0.954414
0.3832	0.70482	0.580986	0.958	0.564282	0.567676	0.811104	0.816826	0.673064	0.674071	0.633734	0.630147	0.923429	0.954376
0.3836	0.704789	0.580942	0.959	0.564253	0.567764	0.811142	0.816887	0.673052	0.674077	0.633711	0.630178	0.923356	0.954372
0.384	0.704747	0.58091	0.96	0.56424	0.56786	0.811169	0.816973	0.67308	0.67411	0.63366	0.630164	0.923278	0.954436
0.3844	0.704703	0.580886	0.961	0.564245	0.567933	0.811207	0.817036	0.673163	0.674088	0.633602	0.630155	0.923251	0.954553
0.3848	0.704663	0.580867	0.962	0.564291	0.567995	0.811253	0.817063	0.673274	0.674088	0.633562	0.630131	0.923259	0.954723
0.3852	0.704593	0.580848	0.963	0.564338	0.568037	0.811289	0.817086	0.673368	0.674057	0.633476	0.630107	0.923274	0.954854
0.3856	0.70454	0.580818	0.964	0.564405	0.568085	0.811292	0.817023	0.67344	0.674036	0.633386	0.630061	0.923285	0.954906
0.386	0.70449	0.580816	0.965	0.564507	0.568114	0.81122	0.816917	0.673504	0.674036	0.633351	0.630011	0.923288	0.954848
0.3864	0.704472	0.580841	0.966	0.564595	0.568155	0.811143	0.816804	0.673603	0.674031	0.633383	0.62991	0.92329	0.954762
0.3868	0.70444	0.580847	0.967	0.564679	0.568166	0.811133	0.816728	0.673729	0.674025	0.633433	0.629785	0.923327	0.954705
0.3872	0.704376	0.5809	0.968	0.564724	0.568154	0.811138	0.81661	0.673805	0.674006	0.633507	0.629722	0.923411	0.954666
0.3876	0.704368	0.580886	0.969	0.564744	0.568114	0.811137	0.8165	0.673834	0.674029	0.633594	0.629725	0.923489	0.954701
0.388	0.704344	0.580914	0.97	0.564772	0.568072	0.811095	0.816397	0.673825	0.674045	0.633648	0.629756	0.923533	0.954735
0.3884	0.704303	0.580951	0.971	0.564744	0.567981	0.811079	0.81628	0.673773	0.674072	0.633691	0.629793	0.923565	0.954711
0.3888	0.70428	0.580966	0.972	0.564735	0.567881	0.811037	0.816178	0.67367	0.674076	0.633726	0.629847	0.92358	0.954618
0.3892	0.704273	0.581011	0.973	0.564685	0.567761	0.81102	0.816133	0.673557	0.67405	0.633773	0.62989	0.923609	0.954526
0.3896	0.704218	0.58104	0.974	0.564601	0.567667	0.811	0.816107	0.673408	0.674015	0.63376	0.629955	0.923603	0.954433
0.39	0.704208	0.58108	0.975	0.564481	0.567554	0.810937	0.81609	0.673271	0.673978	0.633741	0.63004	0.923572	0.954361
0.3904	0.704173	0.581109	0.976	0.564381	0.567442	0.810891	0.816104	0.673173	0.67397	0.633731	0.630102	0.923534	0.954354
0.3908	0.704128	0.581108	0.977	0.564299	0.567336	0.810882	0.816183	0.673118	0.673984	0.633763	0.630123	0.923508	0.954331
0.3912	0.704113	0.581139	0.978	0.564246	0.567239	0.810924	0.816244	0.673082	0.674001	0.633818	0.63013	0.923469	0.95434
0.3916	0.70412	0.581162	0.979	0.564239	0.567195	0.810973	0.816341	0.673044	0.674015	0.633863	0.630152	0.923458	0.954397
0.392	0.704113	0.581185	0.98	0.564264	0.567213	0.810983	0.816464	0.673019	0.673984	0.633863	0.630196	0.923409	0.954429
0.3924	0.704164	0.581192	0.981	0.564281	0.567264	0.811034	0.816553	0.672956	0.673985	0.633772	0.630257	0.923355	0.954434
0.3928	0.704159	0.581209	0.982	0.564288	0.567369	0.811024	0.816595	0.672898	0.673982	0.633653	0.630305	0.923305	0.954423
0.3932	0.704177	0.581237	0.983	0.564301	0.567496	0.811017	0.816685	0.67289	0.673993	0.633559	0.63033	0.92328	0.95445
0.3936	0.704212	0.581299	0.984	0.564284	0.567614	0.811001	0.816791	0.67289	0.673998	0.633432	0.63033	0.923276	0.954526
0.394	0.704281	0.5813	0.985	0.56428	0.567759	0.810973	0.816837	0.672904	0.673987	0.633336	0.630299	0.923217	0.954623
0.3944	0.704255	0.581333	0.986	0.564278	0.567889	0.810974	0.816846	0.672974	0.674009	0.633243	0.630222	0.923136	0.954731
0.3948	0.704283	0.581349	0.987	0.56429	0.567973	0.810999	0.816828	0.673064	0.674008	0.633179	0.630131	0.923039	0.954819
0.3952	0.704329	0.581378	0.988	0.56433	0.568006	0.811081	0.8168	0.673183	0.674043	0.633126	0.630026	0.922969	0.954795
0.3956	0.70432	0.581411	0.989	0.564415	0.568008	0.811163	0.816796	0.673283	0.674049	0.633141	0.629924	0.922943	0.954747
0.396	0.704346	0.581452	0.99	0.564532	0.567996	0.811225	0.816775	0.673412	0.674021	0.633179	0.629801	0.922953	0.95467
0.3964	0.704344	0.5815	0.991	0.564651	0.568002	0.81128	0.816755	0.673509	0.673996	0.633224	0.629712	0.922958	0.954587
0.3968	0.704412	0.581538	0.992	0.564766	0.568007	0.811276	0.816644	0.673583	0.673967	0.633331	0.629681	0.922967	0.9545
0.3972	0.704471	0.581585	0.993	0.5648	0.568005	0.811233	0.816539	0.67362	0.673959	0.633457	0.629638	0.923016	0.954454
0.3976	0.704494	0.581592	0.994	0.564834	0.568024	0.811157	0.81642	0.673664	0.673957	0.633578	0.6296	0.923077	0.954464
0.398	0.704534	0.581614	0.995	0.564838	0.568034	0.811088	0.816296	0.673682	0.673943	0.633678	0.629623	0.923159	0.954512
0.3984	0.704565	0.581609	0.996	0.564853	0.568061	0.811012	0.816226	0.673683	0.67391	0.633736	0.629682	0.923203	0.954605
0.3988	0.704608	0.581609	0.997	0.564843	0.568047	0.81096	0.816152	0.673687	0.673876	0.63373	0.629777	0.923232	0.954642
0.3992	0.704654	0.581604	0.998	0.564809	0.567967	0.810944	0.816076	0.673619	0.673861	0.633688	0.629861	0.923222	0.954609
0.3996	0.70468	0.581577	0.999	0.564748	0.567862	0.81093	0.816021	0.673509	0.673856	0.633689	0.629914	0.923263	0.954533
0.4	0.704686	0.581539	1	0.564643	0.567704	0.810958	0.816056	0.673361	0.673855	0.633675	0.629936	0.923303	0.954431
