# Supplementary material for: Kinetic regulation of kinesin’s two motor domains coordinates its stepping along microtubules
Source: eLife. 2025 Apr 17;14:RP106228. doi: 10.7554/eLife.106228 (PMC12005725; doi:10.7554/eLife.106228)
Supplement: Figure 3—figure supplement 2—source data 1. [file elife-106228-fig3-figsupp2-data1.xlsx]

## Sheet: WT
Binding Frequency		Fig.3-suppl 2,4
WT
	DTT
No	cumaltive num	num of points	width	height		um/s/nM
1	20	20	115	2000	0.108696	0.543478
3	31	11	121	2000	0.0568182	0.284091
5	56	25	114	2000	0.137061	0.685307
7	77	21	114	2000	0.115132	0.575658
9	102	25	125	2000	0.125	0.625
15	129	27	127	2000	0.132874	0.66437
17	149	20	125	2000	0.1	0.5
20	171	22	123	2000	0.111789	0.558943
22	184	13	125	2000	0.065	0.325
		20.4444			mean	0.529094
					sd	0.140398
					sem	0.0467994
					n	9
	Cu
No	cumaltive num	num of points	width	height		um/s/nM
2_1	23	23	125	2000	0.115	0.575
3	54	31	141	2000	0.137411	0.687057
20	70	16	149	2000	0.0671141	0.33557
22	90	20	143	2000	0.0874126	0.437063
30	110	20	138	2000	0.0905797	0.452899
32	135	25	141	2000	0.110816	0.554078
39	159	24	128	2000	0.117188	0.585938
1_1	178	19	131	2000	0.0906489	0.453244
3	190	12	117	2000	0.0641026	0.320513
5	205	15	126	2000	0.0744048	0.372024
					mean	0.477339
					sd	0.120086
					sem	0.0379745
					n	10

## Sheet: 222 334
Binding Frequency
222/334
DTT			500nM
FileNumber	number	number of binding	width(pix)	height
1	84	84	127	2000	0.826772
5	135	51	125	2000	0.51
7	191	56	119	2000	0.588235
9	257	66	126	2000	0.654762
10	328	71	129	2000	0.687984
13	398	70	124	2000	0.705645
14	449	51	143	2000	0.445804
15	488	39	142	2000	0.34331
17	560	72	106	2000	0.849057
19	620	60	125	2000	0.6
21	682	62	122	2000	0.635246
25	744	62	127	2000	0.610236
27	795	51	124	2000	0.514113
					0.613166	mean
					0.141342	sd
					0.0392012	sem
					13	n
Cu			500nM
FileNumber	number	number of binding	width	height
1	13	13	117	2000	0.138889
2	27	14	127	2000	0.137795
3	42	15	117	2000	0.160256
5	52	10	111	2000	0.112613
7	58	6	126	2000	0.0595238
8	67	9	127	2000	0.0885827
9	70	3	124	2000	0.0302419
12	72	2	123	2000	0.0203252
13	78	6	128	2000	0.0585938
15	84	6	106	2000	0.0707547
18	98	14	123	2000	0.142276
19	113	15	127	2000	0.147638
21	120	7	109	2000	0.0802752
23	127	7	119	2000	0.0735294
24	140	13	123	2000	0.132114
					0.0968939	mean
					0.0449734	sd
					0.0116121	sem
					15	n
				15.8022	%

## Sheet: 47 328
Binding Frequency

## Sheet: 4 330
Binding Frequency
4/330
	DTT
No	cumaltive num	num of points	width	height		um/s/nM
1	15	15	96	2000	0.0976562	0.195312
3	27	12	131	2000	0.0572519	0.114504
5	45	18	125	2000	0.09	0.18
7	66	21	125	2000	0.105	0.21
9	92	26	142	2000	0.114437	0.228873
11	108	16	124	2000	0.0806452	0.16129
13	131	23	143	2000	0.100524	0.201049
15	151	20	88	2000	0.142045	0.284091
17	175	24	142	2000	0.105634	0.211268
19	194	19	128	2000	0.0927734	0.185547
22	213	19	128	2000	0.0927734	0.185547
24	227	14	120	2000	0.0729167	0.145833
27	267	40	127	2000	0.19685	0.393701
29	289	22	128	2000	0.107422	0.214844
		20.6429			mean	0.20799
					sd	0.0665417
					sem	0.017784
					n	14
	Cu
No	cumaltive num	num of points	width	height		um/s/nM
1	8	8	106	2000	0.0471698	0.0943396
3	21	13	121	2000	0.0671488	0.134298
5	37	16	149	2000	0.0671141	0.134228
7	48	11	130	2000	0.0528846	0.105769
11	54	6	126	2000	0.0297619	0.0595238
15	63	9	133	2000	0.0422932	0.0845865
17	73	10	152	2000	0.0411184	0.0822368
22	88	15	127	2000	0.0738189	0.147638
24	94	6	128	2000	0.0292969	0.0585938
26	111	17	130	2000	0.0817308	0.163462
28	143	32	128	2000	0.15625	0.3125
20	151	8	126	2000	0.0396825	0.0793651
					mean	0.121378
					sd	0.0692253
					sem	0.0199836
					n	12

## Sheet: 47 335
Binding Frequency
47_335
	DTT
No	cumaltive num	num of points	width	height		um/s/nM
3	28	28	140	2000	0.125	0.625
6	45	17	118	2000	0.090042	0.450212
8	74	29	129	2000	0.140504	0.702519
10	96	22	128	2000	0.107422	0.537109
12	112	16	149	2000	0.067114	0.33557
14	151	39	132	2000	0.184659	0.923295
16	171	20	130	2000	0.096154	0.480769
20	187	16	118	2000	0.084746	0.423729
23	219	32	129	2000	0.155039	0.775194
25	250	31	128	2000	0.151367	0.756836
					mean	0.601023
					sd	0.18635
					sem	0.058929
					n	10
Cu
No	cumaltive num	num of points	width	height		um/s/nM
1	29	28	134	2000	0.130597	0.652985
3	80	51	129	2000	0.247093	1.23547
5	123	43	128	2000	0.209961	1.04981
7	178	55	129	2000	0.266473	1.33236
11	219	41	154	2000	0.166396	0.831981
13	265	46	127	2000	0.226378	1.13189
17	311	46	130	2000	0.221154	1.10577
19	371	60	130	2000	0.288462	1.44231
21	429	58	128	2000	0.283203	1.41602
26	498	70	128	2000	0.341797	1.70898
					mean	1.19076
					sd	0.307879
					sem	0.09736
					n	10
