# Supplementary material for: Kinetic regulation of kinesin’s two motor domains coordinates its stepping along microtubules
Source: eLife. 2025 Apr 17;14:RP106228. doi: 10.7554/eLife.106228 (PMC12005725; doi:10.7554/eLife.106228)
Supplement: Figure 3—figure supplement 2—source data 2. [file elife-106228-fig3-figsupp2-data2.xlsx]

## Sheet: WT
Dwell time of the microtubule-bound state (s)			Fig.2-suppl 2,4
WT DTT	WT Cu
0.03	0.01
0.11	0.02
0.11	0.01
0.02	0.01
0.01	0.01
0.01	0.01
0.01	0.11
0.07	0.02
0.01	0.02
0.02	0.01
0.02	0.03
0.03	0.02
0.06	0.02
0.06	0.01
0.01	0.01
0.05	0.03
0.07	0.01
0.12	0.08
0.03	0.04
0.04	0.02
0.09	0.03
0.01	0.02
0.08	0.01
0.07	0.06
0.01	0.01
0.06	0.02
0.02	0.03
0.05	0.05
0.04	0.01
0.02	0.01
0.03	0.05
0.02	0.03
0.02	0.02
0.01	0.13
0.03	0.06
0.09	0.04
0.01	0.02
0.01	0.01
0.01	0.01
0.02	0.01
0.06	0.03
0.01	0.01
0.03	0.02
0.02	0.01
0.09	0.02
0.02	0.69
0.03	0.02
0.04	0.03
0.01	0.03
0.02	0.04
0.04	0.01
0.01	0.05
0.05	0.02
0.06	0.01
0.07	0.04
0.07	0.01
0.05	0.04
0.02	0.02
0.01	0.01
0.03	0.02
0.1	0.07
0.01	0.01
0.01	0.16
0.02	0.02
0.01	0.01
0.01	0.02
0.01	0.01
0.04	0.02
0.01	0.01
0.01	0.01
0.04	0.01
0.04	0.01
0.01	0.01
0.05	0.01
0.01	0.06
0.01	0.07
0.01	0.02
0.03	0.01
0.01	0.03
0.02	0.12
0.02	0.04
0.05	0.02
0.02	0.01
0.03	0.02
0.02	0.01
0.03	0.07
0.01	0.01
0.03	0.01
0.14	0.02
0.04	0.04
0.05	0.03
0.07	0.05
0.01	0.07
0.04	0.01
0.02	0.02
0.04	0.03
0.01	0.02
0.01	0.08
0.01	0.15
0.05	0.05
0.02	0.02
0.02	0.04
0.01	0.02
0.04	0.01
0.11	0.05
0.01	0.01
0.02	0.07
0.01	0.07
0.05	0.21
0.01	0.01
0.01	0.19
0.01	0.01
0.04	0.03
0.02	0.07
0.05	0.01
0.03	0.03
0.09	0.05
0.03	0.02
0.01	0.01
0.04	0.17
0.04	0.04
0.01	0.12
0.01	0.02
0.17	0.03
0.01	0.01
0.04	0.06
0.02	0.04
0.03	0.02
0.03	0.04
0.01	0.02
0.02	0.03
0.06	0.03
0.01	0.09
0.01	0.03
0.02	0.04
0.11	0.14
0.02	0.03
0.04	0.03
0.02	0.13
0.01	0.05
0.01	0.02
0.03	0.03
0.01	0.01
0.02	0.03
0.02	0.03
0.01	0.01
0.03	0.01
0.01	0.03
0.13	0.05
0.03	0.04
0.01	0.02
0.07	0.01
0.14	0.02
0.01	0.01
0.02	0.14
0.01	0.01
0.02	0.11
0.04	0.19
0.01	0.03
0.1	0.01
0.03	0.02
0.01	0.07
0.03	0.04
0.02	0.08
0.01	0.03
0.02	0.24
0.02	0.02
0.02	0.06
0.02	0.02
0.03	0.01
0.02	0.01
0.01	0.01
0.01	0.05
0.05	0.04
0.01	0.01
0.02	0.06
0.02	0.02
0.05	0.01
0.01	0.01
0.03	0.04
0.01	0.02
0.02	0.02
0.01	0.02
0.01	0.08
	0.42
	0.02
	0.12
	0.09
	0.05
	0.04
	0.01
	0.07
	0.08
	0.01
	0.02
	0.13
	0.01
	0.01
	0.02
	0.01
	0.01
	0.04
	0.02
	0.03
	0.01

## Sheet: 222 334
Dwell time of the microtubule-bound state (s)
222/334 DTT	222/334 Cu
0.06	0.8
0.01	0.01
0.03	0.02
0.01	0.01
0.02	0.03
0.06	0.01
0.03	0.01
0.02	0.01
0.01	0.01
0.03	0.07
0.02	1.53
0.01	0.01
0.02	0.05
0.03	0.02
0.02	0.01
0.03	0.01
0.03	0.01
0.01	0.02
0.21	0.02
0.12	0.02
0.08	0.01
0.01	0.05
0.23	0.02
0.14	0.02
0.01	0.01
0.03	0.01
0.02	0.21
0.01	0.01
0.02	0.01
0.01	0.03
0.01	0.01
0.01	0.01
0.01	0.01
0.02	0.07
0.06	0.01
0.01	0.01
0.05	0.03
0.02	0.02
0.03	0.02
0.02	0.06
0.02	0.02
0.03	0.01
0.03	0.05
0.08	0.01
0.04	0.04
0.07	0.34
0.01	0.1
0.01	0.02
0.02	0.03
0.01	0.01
0.02	0.02
0.07	0.02
0.01	0.07
0.01	0.02
0.04	0.01
0.13	0.1
0.02	0.09
0.01	0.01
0.01	0.01
0.01	0.06
0.02	0.11
0.09	0.03
0.06	0.01
0.05	0.83
0.18	0.02
0.02	0.01
0.21	0.11
0.1	0.05
0.02	0.02
0.1	0.02
0.1	0.03
0.06	0.02
0.01	0.02
0.01	0.01
0.02	0.01
0.07	0.13
0.05	0.01
0.01	0.01
0.03	0.43
0.03	0.43
0.07	0.15
0.05	0.01
0.09	0.04
0.04	0.01
0.02	0.06
0.05	0.01
0.05	0.09
0.03	0.02
0.04	0.02
0.04	0.02
0.02	0.03
0.01	0.01
0.08	0.09
0.01	0.01
0.06	0.05
0.01	0.08
0.02	0.03
0.01	0.05
0.02	0.02
0.04	0.59
0.03	0.03
0.01	0.01
0.03	0.01
0.03	0.02
0.01	0.01
0.04	0.01
0.67	0.14
0.02	0.04
0.01	0.03
0.02	0.15
0.01	0.04
0.02	0.04
0.01	0.06
0.05	0.01
0.01	0.01
0.06	0.01
0.02	0.03
0.01	0.06
0.09	0.01
0.03	0.01
0.01	0.05
0.01	0.03
1.12	0.36
0.04	0.03
0.02	0.01
0.01	0.02
0.01	0.03
0.03	0.03
0.01	0.05
0.03	0.04
0.02	0.01
0.01	0.12
0.06	0.01
0.08	0.03
0.01	0.01
0.03	0.02
0.01	0.03
0.01	0.01
0.01	0.06
0.02	0.01
0.05
0.03
0.02
0.02
0.01
0.01
0.03
0.02
0.01
0.15
0.01
0.02
0.03
0.03
0.07
0.01
0.18
0.01
0.02
0.03
0.01
0.03
0.01
0.09
0.05
0.08
0.01
0.04
0.33
0.04
0.01
0.03
0.02
0.02
0.04
0.04
0.02
0.01
0.01
0.01
0.01
0.01
0.02
0.08
0.08
0.02
0.04
0.02
0.01
0.04
0.01
0.01
0.02
0.02
0.01
0.01
0.04
0.01
0.07
0.01
0.03
0.01
0.01
0.02
0.01
0.01
0.01
0.06
0.04
0.03
0.02
0.08
0.04
0.01
0.04
0.03
0.02
0.11
0.12
0.01
0.01
0.02
0.01
0.01
0.03
0.01
0.11
0.02
0.09
0.02
0.22
0.08
0.02
0.02
0.02
0.01
0.18
0.23
0.06
0.28
0.1
0.08
0.11
0.01
0.02
0.03
0.01
0.04
0.03
0.03
0.01
0.01
0.14
0.06
0.02
0.01
0.01
0.11
0.01
0.04
0.08
0.04
0.06
0.07
0.22
0.03
0.03
0.04
0.01
0.01
0.04
0.13
0.04
0.03
0.06
0.02
0.01
0.09
0.04
0.02
0.11
0.02
0.1
0.02
0.02
0.01
0.01
0.01
0.01
0.05
0.37
0.01
0.02
0.05
0.04
0.01
0.05
0.04
0.04
0.06
0.06
0.29
0.01
0.05
0.04
0.02
0.04
0.01
0.01
0.01
0.01
0.01
0.01
0.01
0.05
0.02
0.01
0.01
0.02
0.07
0.1
0.05
0.26
0.01
0.02
0.05
0.07
0.01
0.03
0.05
0.01
0.02
0.03
0.08
0.02
0.13
0.04
0.01
0.02
0.03
0.01
0.08
0.04
0.01
0.09
0.07
0.01
0.02
0.07
0.02
0.02
0.04
0.03
0.01
0.01
0.01
0.02
0.01
0.03
0.05
0.01
0.03
0.01
0.14
0.12
0.04
0.02
0.01
0.01
0.01
0.05
0.01
0.02
0.02
0.08
0.01
0.14
0.04
0.01
0.02
0.07
0.06
0.01
0.02
0.03
0.06
0.15
0.06
0.01
0.02
0.03
0.05
0.01
0.01
0.03
0.01
0.01
0.01
0.12
0.09
0.12
0.02
0.11
0.02
0.05
0.03
0.02
0.01
0.01
0.02
0.02
0.09
0.08
0.01
0.03
0.01
0.03
0.03
0.02
0.01
0.02
0.01
0.01
0.03
0.02
0.01
0.02
0.04
0.03
0.01
0.01
0.01
0.03
0.01
0.01
0.04
0.03
0.02
0.01
0.02
0.4
0.02
0.02
0.01
0.01
0.1
0.05
0.01
0.01
0.05
0.1
0.01
0.01
0.01
0.01
0.22
0.01
0.01
0.07
0.02
0.01
0.05
0.01
0.03
0.01
0.02
0.01
0.02
0.01
0.04
0.15
0.03
0.01
0.04
0.02
0.01
0.01
0.01
0.01
0.02
0.13
0.01
0.01
0.01
0.01
0.01
0.04
0.04
0.03
0.05
0.04
0.04
0.03
0.01
0.01
0.01
0.09
0.02
0.11
0.07
0.06
0.16
0.02
0.01
0.01
0.01
0.03
0.03
0.02
0.03
0.02
0.06
0.02
0.01
0.08
0.02
0.01
0.01
0.02
0.01
0.01
0.01
0.01
0.02
0.02
0.01
0.01
0.01
0.03
0.01
0.01
0.04
0.06
0.02
0.01
0.01
0.01
0.05
0.01
0.01
0.06
0.01
0.01
0.03
0.02
0.01
0.02
0.04
0.01
0.01
0.01
0.01
0.01
0.03
0.02
0.02
0.09
0.02
0.01
0.02
0.01
0.01
0.02
0.11
0.01
0.01
0.01
0.05
0.3
0.06
0.01
0.05
0.01
0.05
0.01
0.01
0.04
0.02
0.03
0.01
0.05
0.02
0.03
0.01
0.03
0.01
0.06
0.05
0.01
0.02
0.1
0.01
0.02
0.05
0.01
0.22
0.06
0.01
0.02
0.02
0.01
0.03
0.03
0.01
0.05
0.08
0.02
0.79
0.06
0.05
0.01
0.03
0.01
0.01
0.05
0.07
0.01
0.05
0.02
0.04
0.01
0.01
0.04
0.01
0.07
0.01
0.03
0.02
0.05
0.02
0.03
0.09
0.02
0.01
0.03
0.06
0.05
0.02
0.02
0.05
0.05
0.11
0.02
0.03
0.07
0.03
0.03
0.02
0.01
0.01
0.02
0.01
0.02
0.02
0.05
0.01
0.02
0.03
0.06
0.03
0.02
0.04
0.06
0.02
0.01
0.01
0.2
0.02
0.04
0.03
0.01
0.02
0.01
0.01
0.02
0.01
0.01
0.02
0.46
0.4
0.03
0.01
0.01
0.07
0.01
0.07
0.01
0.04
0.03
0.04
0.01
0.01
0.03
0.02
0.02
0.01
0.02
0.02
0.02
0.02
0.02
0.02
0.19
0.05
0.02
0.02
0.01
0.09
0.02
0.01
0.01
0.05
0.01
0.03
0.01
0.02
0.03
0.01
0.01
0.03
0.19
0.01
0.09
0.02
0.09
0.02
0.02
0.01
0.01
0.15
0.02
0.01
0.08
0.01
0.07
0.08
0.02
0.02
0.02
0.02
0.02
0.04
0.07
0.01
0.08
0.04
0.01
0.01
0.12
0.03
0.04
0.04
0.02
0.01
0.03
0.02
0.01
0.01
0.01
0.01
0.01
0.05
0.04
0.01
0.13
0.19
0.01
0.06
0.05
0.03
0.03
0.06
2.84
0.04
0.05
0.04
0.04
0.14
0.04
0.02
0.03
0.06
0.01
0.01
0.01
0.01
0.03
0.02
0.03
0.02
0.01
0.03
0.02
0.03
0.06

## Sheet: 47 328
Dwell time of the microtubule-bound state (s)
47/328 DTT	47/328 Cu
0.01	1.86
0.02	0.71
0.01	0.59
0.01	0.88
0.04	0.23
0.01	0.08
0.07	0.06
0.04	0.02
0.01	0.12
0.05	0.2
0.04	0.56
0.02	0.17
0.1	0.35
0.01	0.11
0.01	0.04
0.01	0.25
0.03	0.28
0.01	0.02
0.01	0.13
0.06	0.26
0.02	0.28
0.01	0.37
0.02	0.1
0.01	0.09
0.01	0.62
0.02	0.16
0.03	0.15
0.03	0.53
0.01	0.25
0.19	0.14
0.01	0.1
0.01	0.59
0.07	0.61
0.01	0.44
0.01	0.14
0.05	0.8
0.03	0.24
0.01	0.32
0.01	0.02
0.01	0.05
0.03	0.49
0.1	0.41
0.72	0.35
0.01	1.35
0.02	0.27
0.12	0.06
0.03	0.01
0.01	0.11
0.01	0.01
0.01	0.09
0.03	0.16
0.01	0.03
0.03	0.01
0.07	0.14
3.37	0.2
0.06	0.4
0.02	0.5
0.01	0.43
0.01	0.16
0.01	0.07
0.09	0.13
0.04	0.24
0.05	0.05
0.05	0.04
0.01	0.29
0.01	0.33
0.01	0.15
0.01	0.22
0.02	0.59
0.08	0.36
0.02	0.36
0.02	0.05
0.02	0.05
0.01	0.68
0.26	0.26
0.02	0.48
0.02	0.12
0.03	0.12
0.03	0.23
0.01	0.75
0.01	0.24
0.04	0.58
0.02	0.89
0.01	0.53
0.85	0.08
0.01	0.41
0.04	0.04
0.01	0.12
0.05	0.08
0.02	1.14
0.01	1.89
0.07	0.88
0.02	0.08
0.01	0.09
0.01	0.17
0.03	0.4
0.02	0.54
0.02	0.11
0.02	0.51
0.07	1.01
0.03	0.08
0.01	0.2
0.1	0.15
0.06	0.15
0.08	0.37
0.02	0.3
0.04	0.54
0.06	0.45
0.01	0.25
0.08	0.09
0.01	0.06
0.02	0.14
0.02	0.14
0.03	0.13
0.04	1.22
0.01	0.4
0.03	0.79
0.12	0.16
0.03	0.44
0.03	0.05
0.06	0.07
0.04	0.31
0.02	0.31
0.01	0.75
0.04	2.34
0.01	0.41
0.02	0.01
0.01	0.77
0.02	0.08
0.13	0.48
0.01	0.01
0.03	0.06
0.02	0.04
0.02	0.11
0.03	0.51
0.01	0.16
0.01	0.23
0.02	0.02
0.42	0.19
0.01	0.22
0.14	0.02
0.03	0.39
0.02	0.73
0.02	0.16
0.02	1.67
0.02	1.29
0.02	0.67
0.04	0.53
0.03	0.07
0.03	0.34
0.02	0.04
0.09	0.06
0.01	0.1
0.07	0.45
0.01	0.14
0.11	0.3
0.03	0.14
0.03	0.05
0.04	0.35
0.03	0.05
0.05	1.84
0.08	0.31
0.01	0.12
0.02	0.27
0.02	0.02
0.01	0.64
1.31	0.56
0.84	1.07
0.01	0.7
0.01	0.31
0.01	0.56
0.01	0.52
0.44	0.34
0.03	0.07
0.03	0.27
0.01	0.31
0.23	0.42
0.07	0.12
0.38	0.15
0.03	0.85
0.01	0.26
0.02	0.06
0.02	0.14
0.08	0.43
0.15	1.41
0.02	0.15
0.01	0.08
0.33	0.21
0.04	0.1
0.22	1.14
0.08	1.27
0.02	0.09
0.02	0.63
0.01	0.62
0.13	0.2
0.04	0.3
0.02	0.55
0.07	0.23
0.03	0.66
0.03	0.21
0.03	0.15
0.1	0.11
0.34	0.03
0.07	0.23
0.13	0.11
0.03	0.25
0.03	0.19
0.03	0.1
0.01	0.39
0.1	0.17
0.01	0.31
0.01	0.11
0.06	0.06
0.45	0.04
0.01	0.03
0.02	0.02
0.01	0.12
0.05	0.13
0.04	0.81
0.03	0.17
0.18	0.38
0.03	1.01
0.01	0.06
0.01	0.37
0.02	0.2
0.01	0.22
0.3	0.44
0.35	0.27
0.04	0.31
0.05	0.02
0.02	0.01
0.01	0.01
0.01	0.01
0.02	0.26
0.03	0.12
0.01	0.02
0.01	0.08
0.02	0.01
0.02	0.66
0.05	0.58
0.04	0.09
0.01	0.17
0.01	0.56
0.01	0.19
0.05	0.24
0.01	0.08
0.03	0.57
0.05	0.54
0.16	0.05
0.03	0.01
0.03	0.03
0.22	0.02
0.02	0.31
0.04	0.14
0.01	0.81
0.01	0.11
0.05	0.53
0.02	0.56
0.02	0.27
0.09	0.65
0.03	0.03
0.06	0.22
0.04	0.27
0.02	0.06
0.01	0.05
0.03	0.35
0.01	0.37
0.02	0.13
0.2	0.27
0.01	0.13
0.08	2.02
0.05	0.03
0.03	0.28
0.01	0.09
0.04	0.6
0.02	0.14
0.07	0.1
0.11	0.15
0.04	0.02
0.01	0.01
0.1	0.2
0.02	0.38
0.05	0.31
0.07	0.13
0.04	0.13
0.04	0.36
0.48	0.02
0.41	0.45
0.03	1.08
0.02	0.12
0.02	2.19
0.01	2.05
0.02	0.38
0.03	0.2
0.06	0.04
0.03	0.13
0.01	0.45
0.02	1.01
0.14	0.06
0.02	0.26
0.02	0.19
0.27	1.41
0.04	0.04
0.06	0.1
0.01	0.18
0.01	0.97
0.01	2.12
0.04	0.85
0.48	0.1
0.03	1.19
0.02	0.42
0.08	0.54
0.01	0.14
0.01	0.61
0.01	0.03
0.01	1.44
	0.48
	0.19
	0.28
	0.61
	0.07
	0.32
	0.17
	0.34
	0.38
	0.35
	0.03
	0.06
	0.67
	2.01
	0.7
	0.02
	0.33
	2.34
	0.4
	0.08
	0.69
	0.12
	0.01
	0.52
	1.02
	0.05
	0.41
	0.41
	1.05
	0.42
	0.58
	1.76
	0.15
	0.16
	0.02
	0.12
	0.43
	1.33
	0.27
	1.77
	0.11
	0.34
	1.73
	0.54
	0.09
	0.2
	0.38
	0.21
	1.19
	0.09
	0.03
	0.03
	0.26
	0.39
	0.6
	0.42
	2.23
	0.28
	0.94
	1.87
	1.27
	1.1
	0.83
	0.12
	0.35
	1.04
	0.17
	0.3
	0.43
	0.6
	0.81
	0.4
	0.97
	0.13
	0.9
	0.04
	0.07
	0.23
	0.27
	0.1
	0.1
	0.65
	0.94
	0.43
	0.2
	0.43
	0.05
	0.32
	0.4
	0.32
	1.55
	1.89
	0.02
	0.33
	0.28
	0.2
	0.62
	1.1
	0.26
	0.2
	0.1
	0.24
	0.05
	0.24
	0.08
	0.15
	0.3
	0.19
	0.12
	0.3
	0.15
	0.2
	0.03
	0.13
	0.07
	0.24
	0.03
	0.01
	0.19
	1.86
	0.55
	1.67
	0.39
	0.09
	0.1
	0.09
	0.26
	0.06
	0.01
	0.27
	0.06
	0.13
	0.17
	0.07
	0.4
	0.13
	0.11
	0.4
	0.06
	0.12
	0.04
	0.29
	0.62
	0.02
	0.71
	0.07
	0.02
	1.72
	0.13
	0.04
	0.11
	0.35
	2.14
	0.97
	0.4
	0.63
	1.71
	0.17
	0.42
	1.03
	1.33
	1.25
	0.06
	0.19
	0.64
	0.02
	0.12
	0.29
	0.22
	1.37
	0.38
	0.07
	0.5
	0.09
	0.69
	1.37
	0.05
	2.05
	0.2
	0.22
	0.05
	0.03
	0.29
	0.03
	0.18
	0.85
	1.28
	0.6
	0.2
	0.13
	0.19
	0.23
	1.22
	0.25
	0.2
	0.08
	0.07
	0.13
	0.83
	0.12
	0.01
	0.8
	0.74
	0.22
	0.21
	0.07
	0.57
	0.1
	0.48
	0.84
	0.09
	0.16
	0.07
	0.31
	0.11
	0.78
	0.4
	0.18
	0.44
	0.33
	0.31
	0.21
	0.04
	0.26
	0.71
	0.9
	0.47
	0.21
	1.03
	0.82
	1.19
	0.15
	0.37
	0.34
	0.58
	0.94
	0.17
	0.51
	0.46
	0.24
	0.93
	0.52
	0.67
	0.09
	0.01
	0.42
	0.02
	0.21
	0.01
	0.1
	0.99
	0.14
	0.8
	0.22
	0.26
	0.15
	0.78
	0.75
	0.17
	1.87
	0.84
	1.19
	0.29
	0.17
	3.61
	1.43
	0.5
	0.57
	0.15
	0.52
	0.47
	0.8
	1.38
	0.4
	1.1
	0.14
	0.44
	0.22
	0.19
	0.01
	0.61
	0.89
	0.53
	0.18
	0.43
	0.64
	0.3
	0.56
	0.04
	0.09
	0.13
	0.29
	0.07
	0.03
	0.19
	0.31
	0.26
	0.16
	0.14
	0.34
	0.26
	0.04
	1.34
	0.23
	0.4
	0.31
	0.59
	0.51
	0.47
	0.26
	0.37
	0.05
	0.05
	0.29
	0.23
	0.19
	0.32
	0.65
	2.1
	0.54
	0.81
	0.5
	0.32
	0.34
	0.02
	0.12
	0.25
	0.77
	0.11
	0.09
	0.11
	0.64
	0.29
	0.09
	0.36
	0.26
	1.03
	0.11
	0.1
	0.27
	0.21
	0.43
	0.19
	0.21
	2.3
	0.07
	0.13
	0.06
	0.47
	0.04
	0.63
	0.59
	0.24
	0.11
	0.17
	0.4
	0.39
	0.15
	0.06
	0.43
	0.29
	0.26
	0.15
	0.03
	0.38
	0.96
	0.02
	0.33
	0.02
	0.21
	0.07
	0.27
	1.5
	4.15
	0.31
	0.13
	0.12
	0.09
	0.76
	0.31
	0.48
	0.22
	0.51
	1.52
	0.26
	0.24
	0.52
	0.12
	0.04
	0.11
	0.38
	1.73
	0.45
	1.16
	0.79
	0.56
	0.31
	0.72
	0.26
	0.35
	0.15
	0.77
	0.48
	0.46
	2.1
	0.42
	0.18
	0.42
	0.19
	0.12
	0.01
	0.45
	0.06
	2.16
	0.63
	0.83
	0.31
	0.42
	0.31
	0.91
	0.79
	0.06
	0.38
	0.19
	0.97
	0.08
	0.4
	0.88
	0.29
	0.58
	0.03
	0.47
	1.34
	0.18
	0.66
	0.61
	0.33
	0.16
	0.29
	0.04
	0.26
	0.11
	0.2
	0.05
	0.31
	0.13
	1.24
	0.34
	0.27
	0.38
	0.64
	0.43
	0.05
	1.03
	0.72
	0.27
	0.63
	0.16
	0.53
	0.08
	0.06
	0.06
	0.05
	0.92
	0.83
	0.25
	0.28
	0.24
	0.22
	0.26
	0.02
	0.02
	0.45
	0.02
	0.15
	0.23
	0.03
	0.44
	0.62
	0.14
	0.11
	0.3
	0.6
	0.61
	0.19
	0.85
	0.18
	0.5
	0.99
	0.13
	0.52
	0.47
	0.39
	1.35
	0.64
	0.38
	0.04
	0.38
	0.88
	2.56
	2.31
	1.35
	1.08
	0.36
	0.99
	0.61
	0.77
	0.35
	1.93
	0.16
	0.78
	0.64
	1.75
	0.37
	0.47
	0.12
	0.48
	0.46
	0.05
	0.14
	0.15
	0.33
	0.58
	0.71
	0.35
	0.04
	0.1
	0.15
	0.08
	0.19
	0.2
	0.2
	0.05
	0.05
	0.02
	0.16
	0.09
	0.05
	0.02
	0.03
	3.01
	0.44
	3.28
	0.73
	0.56
	0.48
	0.11
	1.84
	0.79
	0.07
	1.03
	0.12
	0.09
	0.09
	0.36
	0.05
	0.17
	0.57
	2.67
	0.41
	0.4
	0.16
	0.27
	1.58
	0.7
	0.3
	0.12
	0.37
	0.29
	2.97
	0.09
	0.24
	0.27
	0.1
	0.78
	0.13
	0.36
	1.05
	0.26
	0.48
	0.23
	0.12
	0.91
	0.23
	0.33
	1
	1.73
	0.42
	0.15
	0.27
	0.52
	1.25
	0.26
	0.47
	0.12
	0.26
	0.29
	1.16
	1.15
	0.42
	0.5
	0.29
	0.23
	0.1
	0.7
	1.52
	0.11
	0.02
	0.51
	1.23
	0.28
	0.36
	0.83
	1.57
	1.8
	0.23
	0.13
	0.47
	0.3
	0.09
	0.26
	0.26
	0.53
	1.05
	0.73
	0.18
	0.15
	0.89
	1.11
	1.06
	0.73
	0.05
	0.71
	0.07
	0.19
	0.07
	0.29
	0.96
	1.13
	0.23
	0.27
	0.53
	0.82
	0.67
	0.25
	0.01
	0.3
	0.54
	0.06
	0.05
	1.65
	0.55
	0.01
	1.76
	1.74
	0.45
	0.08
	0.15
	0.32
	0.17
	1.25
	0.51
	1.42
	0.62
	0.28
	1.09
	1.09
	0.78
	0.88
	1.16
	0.53
	0.98
	0.22
	0.15
	0.19
	0.22
	0.59
	0.15
	0.48
	0.65
	0.13
	0.11
	0.63
	0.19
	0.23
	0.55
	0.36
	0.24
	0.04
	0.21
	0.74
	1.55
	0.14
	1.51
	0.12
	0.07
	0.7
	0.02
	0.07
	0.01
	0.61
	0.07
	0.73
	0.44
	1.8
	1.16
	0.77
	0.59
	0.35
	0.42
	0.04
	0.23
	0.69
	0.12
	0.53
	0.26
	0.04
	0.59
	0.22
	0.23
	0.56
	0.85
	0.84
	0.96
	0.1
	0.59
	0.06
	0.03
	0.13
	0.16
	0.14
	0.22
	0.04
	0.17
	0.15
	0.33
	1.23
	0.35
	0.5
	0.37
	0.53
	0.39
	0.09
	1.07
	0.49
	0.42
	0.89
	0.08
	0.12
	0.02
	0.07
	0.53
	0.35
	0.21
	0.05
	0.24
	0.08
	0.61
	1.93
	0.02
	0.47
	1
	0.17
	2.6
	0.71
	0.26
	0.11
	0.4
	0.57
	0.02
	0.04
	0.53
	0.5
	0.19
	0.38
	0.14
	0.05
	1.65
	0.27
	0.77
	0.66
	0.19
	0.08
	0.01
	1.23
	0.44
	0.32
	1.08
	3.34
	0.1
	2.83
	0.54
	0.44
	0.24
	0.1
	0.07
	0.2
	0.25
	0.03
	0.11
	0.14
	1.1
	0.03
	0.69
	0.95
	0.04
	1.65
	0.21
	0.65
	0.18
	1.25
	0.2
	3.95
	0.42
	0.22
	1.69
	0.25
	0.69
	0.28
	0.19
	0.18
	0.9
	0.46
	1.15
	0.73
	0.38
	0.19
	0.95
	0.32
	0.15
	0.57
	0.11
	0.47
	0.42
	0.47
	0.13
	0.73
	0.75
	0.43
	0.6
	1.99
	0.76
	0.68
	0.42
	0.18
	0.08
	2.01
	1.12
	0.19
	0.39
	0.82
	0.17
	0.16
	1.83
	0.1
	0.2
	0.18
	0.13
	0.03
	0.21
	1.35
	0.49
	0.27
	0.92
	0.31
	0.96
	0.08
	0.21
	0.2
	0.3
	0.74
	0.7
	0.2
	0.74
	1.69
	0.39
	0.25
	0.55
	0.13
	0.12
	1.34
	0.97
	0.58
	0.48
	1.04
	0.08
	0.04
	0.48
	0.48
	0.11
	0.19
	0.01
	0.22
	0.58
	1.25
	0.02
	0.01
	0.09
	0.68
	0.78
	1.34
	0.65
	1.39
	0.3
	0.17
	0.06
	0.28
	0.89

## Sheet: 4 330
Dwell time of the microtubule-bound state (s)
4/330 DTT	4/330 Cu
0.06	0.01
0.15	0.01
0.02	0.02
0.01	0.01
0.02	0.01
0.01	0.02
0.04	0.48
0.05	0.01
0.01	0.01
0.03	0.02
0.13	0.01
0.02	0.04
0.01	0.01
0.03	0.02
0.07	0.01
0.01	0.05
0.01	0.08
0.03	0.01
0.06	0.05
0.02	0.19
0.03	0.03
0.07	0.02
0.02	0.01
0.04	0.04
0.06	0.13
0.05	0.01
0.01	0.07
0.01	0.01
0.01	0.03
0.03	0.02
0.01	0.01
0.02	0.01
0.01	0.01
0.17	0.04
0.07	0.02
0.02	0.01
0.03	0.01
0.02	0.01
0.01	0.01
0.03	0.03
0.01	0.03
0.43	0.01
0.03	0.01
0.01	0.01
0.01	0.03
0.01	0.02
0.04	0.01
0.02	0.01
0.01	0.01
0.01	0.06
0.01	2.84
0.02	0.03
0.01	0.06
0.01	0.01
0.12	0.01
0.01	0.03
0.01	0.01
0.01	0.07
0.17	0.02
0.02	0.03
0.01	0.02
0.05	0.01
0.01	0.02
0.01	0.03
0.02	0.05
0.02	0.01
0.02	0.03
0.01	0.04
0.01	0.21
0.01	0.03
0.02	0.02
0.02	0.03
0.23	0.02
0.04	0.06
0.01	0.19
0.02	0.02
0.01	0.01
0.02	0.05
0.02	0.05
0.01	0.01
0.01	0.01
0.14	0.02
0.01	0.03
0.03	0.03
0.03	0.07
0.02	0.01
0.02	0.03
0.01	0.01
0.02	0.04
0.01	0.03
0.02	0.01
0.01	0.05
0.03	0.01
0.05	0.01
0.08	0.01
0.02	0.01
0.01	0.02
0.02	0.01
0.05	0.03
0.01	0.02
0.02	0.02
0.02	0.01
0.03	0.07
0.09	0.02
0.01	0.01
0.01	0.02
0.01	0.02
0.02	0.01
0.03	0.01
0.06	0.01
0.01	0.05
0.07	0.02
0.01	0.01
0.01	0.03
0.02	0.06
0.02	0.01
0.1	0.03
0.04	0.05
0.15	0.01
0.02	0.07
0.05	0.01
0.01	0.03
0.02	0.02
0.16	0.01
0.01	0.06
0.04	0.01
0.07	0.06
0.02	0.05
0.01	0.02
0.02	0.01
0.01	0.02
0.05	0.02
0.02	0.01
0.04	0.02
0.03	0.01
0.01	0.01
0.06	0.02
0.02	0.03
0.01	0.04
0.02	0.11
0.02	0.02
0.03	0.01
0.18	0.01
0.04	0.01
0.08	0.03
0.01	0.06
0.03	0.01
0.04	0.1
0.05	0.03
0.02	0.01
0.01	0.01
2.22
0.02
0.01
0.26
0.01
0.05
0.03
0.12
0.01
0.1
0.01
0.01
0.01
0.04
0.01
0.02
0.06
0.01
0.02
0.02
0.01
0.01
0.02
0.01
0.01
0.01
0.03
0.01
0.04
0.05
0.01
0.01
0.03
0.01
0.04
0.01
0.12
0.01
0.05
0.03
0.02
0.01
0.02
0.01
0.01
0.1
0.02
0.06
0.02
0.06
0.01
0.22
0.01
0.01
0.05
0.04
0.01
0.02
0.01
0.03
0.09
0.05
0.02
0.02
0.02
0.02
0.01
0.03
0.01
0.01
0.01
0.04
0.13
0.06
0.04
0.01
0.06
0.01
0.01
0.01
0.01
0.05
0.05
0.06
0.01
0.01
0.05
0.01
0.01
0.02
0.06
0.1
0.01
0.05
0.01
0.01
0.01
0.03
0.02
0.03
0.08
0.01
0.01
0.04
0.01
0.01
0.05
0.05
0.02
0.14
0.01
0.01
0.01
0.07
0.01
0.01
0.01
0.02
0.01
0.01
0.09
0.01
0.01
0.01
0.03
0.01
0.02
0.04
0.03
0.04
0.01
0.07
0.04
0.02
0.15
0.09
0.11
0.03

## Sheet: 47 335
Dwell time of the microtubule-bound state (s)
47/335 DTT	47/335 Cu
0.03	0.01
0.03	0.01
0.16	0.01
0.03	0.02
0.02	0.03
0.02	0.03
0.03	0.08
0.04	0.54
0.13	0.24
0.06	0.02
0.01	0.06
0.02	0.02
0.03	0.05
0.05	0.08
0.04	0.02
0.02	0.27
0.03	0.26
0.02	0.01
0.02	0.06
0.02	0.05
0.05	0.08
0.01	0.04
0.06	0.05
0.15	0.11
0.08	0.01
0.03	0.02
0.03	0.02
0.01	0.04
0.01	0.02
0.06	0.14
0.04	0.06
0.02	0.06
0.06	0.01
0.15	0.03
0.01	0.04
0.01	0.01
0.03	0.09
0.01	0.03
0.02	0.03
0.02	0.11
0.09	0.13
0.03	0.03
0.04	0.01
0.03	0.01
0.01	0.02
0.01	0.04
0.01	0.01
0.07	0.01
0.04	0.01
0.01	0.03
0.02	0.01
0.03	0.22
0.03	0.01
0.03	0.04
0.02	0.14
0.03	0.03
0.02	0.01
0.11	0.03
0.01	0.01
0.01	0.02
0.03	0.04
0.07	0.02
0.01	0.02
0.01	0.07
0.03	0.01
0.01	0.06
0.01	0.05
0.05	0.01
0.01	0.02
0.22	0.24
0.04	0.03
0.03	0.02
0.03	0.12
0.02	0.03
0.01	0.05
0.03	0.04
0.04	0.12
0.01	0.01
0.18	0.02
0.04	0.04
0.01	0.09
0.01	0.02
0.13	0.02
0.03	0.08
0.01	0.02
0.02	0.01
0.01	0.04
0.04	0.02
0.11	0.19
0.01	0.04
0.01	0.03
0.02	0.08
0.07	0.05
0.02	0.01
0.06	0.01
0.01	0.1
0.07	0.01
0.03	0.01
0.06	0.03
0.17	0.06
0.18	0.02
0.01	0.12
0.01	0.04
0.01	0.11
0.01	0.11
0.01	0.07
0.05	0.01
0.05	0.01
0.01	0.02
0.15	0.02
0.01	0.02
0.01	0.03
0.01	0.02
0.06	0.03
0.01	0.02
0.02	0.06
0.02	0.01
0.08	0.06
0.01	0.36
0.02	0.05
0.05	0.03
0.02	0.09
0.02	0.07
0.03	0.09
0.09	0.02
0.01	0.08
0.01	0.02
0.01	0.02
0.01	0.01
0.06	0.04
0.02	0.03
0.03	0.09
0.03	0.06
0.07	0.01
0.01	0.06
0.01	0.03
0.02	0.32
0.07	0.01
0.01	0.01
0.07	0.01
0.01	0.03
0.11	0.03
0.01	0.07
0.01	0.02
0.01	0.01
0.02	0.01
0.02	0.06
0.08	0.03
0.05	0.03
0.02	0.01
0.01	0.02
0.01	0.03
0.03	0.04
0.02	0.06
0.08	0.1
0.04	0.02
0.04	0.01
0.01	0.03
0.01	0.02
0.15	0.01
0.2	0.11
0.01	0.08
0.03	0.58
0.06	0.13
0.03	0.02
0.08	0.02
0.01	0.23
0.01	0.02
0.04	0.01
0.01	0.13
0.01	0.01
0.01	0.01
0.02	0.01
0.01	0.04
0.02	0.01
0.01	0.03
0.01	0.01
0.02	0.03
0.02	0.06
0.02	0.04
0.02	0.03
0.06	0.89
0.02	0.07
0.01	0.02
0.05	0.03
0.01	0.12
0.01	0.02
0.06	0.06
0.04	0.02
0.11	0.01
0.04	0.04
0.02	0.05
0.02	0.04
0.01	0.03
0.02	0.92
0.01	0.08
0.01	0.02
0.01	0.05
0.01	0.02
0.06	0.82
0.02	0.2
0.06	0.01
0.01	0.05
0.01	0.04
0.01	0.09
0.01	0.12
0.02	0.03
0.01	0.02
0.03	0.01
0.02	0.05
0.02	0.02
0.01	0.02
0.03	0.02
0.08	0.03
0.01	0.04
0.05	0.01
0.05	0.01
0.01	0.05
0.01	0.01
0.02	0.02
0.01	0.05
0.01	0.07
0.03	0.01
0.06	0.03
0.01	0.03
0.01	0.03
0.03	0.08
0.01	0.1
0.03	0.07
0.06	0.01
0.05	0.06
0.14	0.01
0.07	0.09
0.03	0.02
0.03	0.02
0.01	0.04
0.02	0.03
0.67	0.06
0.01	0.01
0.06	0.01
0.01	0.12
0.01	0.02
0.01	0.02
0.05	0.11
0.01	0.03
0.01	0.02
0.01	0.03
0.01	0.02
0.02	0.04
0.01	0.05
	0.04
	0.08
	0.1
	0.12
	0.03
	0.02
	0.1
	0.02
	0.04
	0.02
	0.07
	0.02
	0.01
	0.06
	0.07
	0.03
	0.07
	0.07
	0.03
	0.01
	0.02
	0.01
	0.26
	0.42
	0.05
	0.02
	0.04
	0.02
	0.03
	0.02
	0.04
	0.05
	0.02
	0.05
	0.04
	0.04
	0.08
	0.01
	0.05
	0.19
	0.03
	0.02
	0.06
	0.04
	0.05
	0.02
	0.06
	0.01
	0.09
	0.04
	0.04
	0.03
	0.01
	0.05
	0.02
	0.01
	0.03
	0.03
	0.06
	0.01
	0.02
	0.03
	0.08
	0.05
	0.01
	0.09
	0.01
	0.04
	0.02
	0.07
	0.03
	0.05
	0.17
	0.02
	0.01
	1.65
	0.27
	0.02
	0.01
	0.07
	0.11
	0.03
	0.04
	0.45
	0.02
	0.04
	0.04
	0.05
	0.05
	0.05
	0.05
	0.18
	0.5
	0.03
	0.14
	0.02
	0.01
	0.04
	0.02
	0.04
	0.03
	0.03
	0.1
	0.01
	0.06
	0.02
	0.11
	0.03
	0.03
	0.05
	0.01
	0.05
	0.07
	0.06
	0.01
	0.04
	0.02
	0.01
	0.05
	0.04
	0.01
	0.1
	0.03
	1.63
	0.68
	0.11
	0.02
	0.04
	0.07
	0.04
	0.04
	0.09
	0.04
	0.02
	0.01
	0.15
	0.05
	0.05
	0.01
	0.03
	0.03
	0.06
	0.03
	0.01
	0.04
	0.04
	0.01
	0.9
	0.34
	0.04
	0.03
	0.12
	0.03
	0.05
	0.04
	0.04
	0.12
	0.04
	0.04
	0.03
	0.01
	0.03
	0.17
	0.01
	0.05
	0.04
	0.01
	0.08
	0.01
	0.05
	0.11
	0.01
	0.05
	0.01
	0.01
	0.04
	0.02
	0.02
	0.04
	0.05
	0.16
	0.06
	0.02
	0.01
	0.07
	0.04
	0.13
	0.68
	0.05
	0.08
	0.02
	0.1
	0.04
	0.01
	0.03
	0.01
	0.06
	0.07
	0.01
	0.14
	0.03
	0.63
	0.15
	0.62
	0.17
	0.04
	0.76
	2.82
	0.11
	0.03
	0.02
	0.03
	0.15
	0.14
	0.06
	0.05
	0.15
	0.08
	0.02
	0.09
	0.03
	0.04
	0.03
	0.07
	0.01
	0.03
	0.06
	0.02
	0.04
	0.08
	0.08
	0.02
	0.11
	0.07
	0.07
	0.02
	0.06
	0.05
	0.08
	0.1
	0.02
	0.07
	0.02
	0.08
	0.11
	0.05
	0.04
	0.08
	0.01
