# Supplementary material for: Kinetic regulation of kinesin’s two motor domains coordinates its stepping along microtubules
Source: eLife. 2025 Apr 17;14:RP106228. doi: 10.7554/eLife.106228 (PMC12005725; doi:10.7554/eLife.106228)
Supplement: Figure 4—figure supplement 1—source data 1. [file elife-106228-fig4-figsupp1-data1.xlsx]

## Sheet: Sheet1
smFRET	E236A/43-WT/215			E236A/215-WT/43			Fig.4-suppl 1B
50 fps
	Cy3	Cy5		Cy3	Cy5
	-0.487	-0.894		-3.736	-0.07275
	-1.139	-3.082		2.63375	-0.33
	1.774	11.527		10.46	-0.82275
	-3.226	13.498		10.6483	-1.214
	-0.299	12.483		10.235	-1.04
	3.875	23.092		12.7205	1.56875
	6.353	16.498		12.5902	4.547
	8.6	19.773		13.286	6.14825
	-0.473	16.396		14.3582	5.2095
	2.252	20.237		14.101	2.4775
	5.295	19.889		14.7063	2.51025
	-1.4	13.961		12.9998	4.09725
	1.89	10.541		10.018	4.3835
	2.948	21.57		9.9165	4.04675
	0.223	21.208		10.0757	2.873
	-2.922	15.353		9.51425	3.07225
	5.122	11.816		9.32225	3.99975
	-1.936	11.642		11.5288	2.38375
	-1.299	14.556		16.239	2.55025
	5.904	19.758		17.6775	4.68075
	2.078	17.889		15.326	4.3765
	3.136	13.802		12.9708	3.32575
	-2.197	11.57		13.1807	3.402
	2.846	19.483		14.8872	3.95275
	6.31	23.787		15.2895	5.48875
	1.658	21.106		14.3257	5.13
	8.672	24.918		15.6698	2.50325
	0.223	15.498		18.1805	2.3945
	-1.806	21.816		14.2713	0.9055
	0.614	13.541		10.8983	-2.13425
	4.064	20.613		13.036	-2.07275
	5.324	15.773		11.978	-0.94225
	5.266	20.063		10.5467	-0.50375
	-2.328	17.903		12.7242	-1.109
	-0.081	16.932		11.8765	-0.515
	1.803	23.729		9.27875	0.90175
	-2.357	17.208		10.6483	1.47075
	-4.792	11.671		12.6555	2.0395
	1.571	17.527		12.094	1.87275
	-3.023	9.628		10.1047	-0.39875
	5.571	17.831		8.391	-1.60525
	4.484	12.164		10.315	0.91975
	3.919	15.686		13.3003	1.753
	5.803	12.527		13.003	0.26775
	3.542	19.889		11.2677	-0.772
	1.977	15.773		10.2933	-0.7105
	0.151	20.382		10.2967	0.7495
	6.716	18.077		8.909	0.12275
	2.788	19.773		8.34	-1.11625
	2.977	20.005		12.9232	0.8075
	1.237	21.063		17.2278	3.34725
	1.629	17.179		16.9922	3.514
	5.266	14.15		12.9415	1.90175
	1.078	13.831		9.52875	2.072
	3.382	16.816		11.7065	2.543
	9.759	15.077		15.5723	1.69525
	4.252	14.106		15.467	0.746
	-0.603	19.324		13.5793	-0.01475
	5.672	18.874		13.9305	2.065
	-1.907	17.309		12.5973	3.37275
	-1.487	15.063		10.0433	2.15525
	3.266	21.903		11.1375	2.6915
	3.295	14.831		14.652	2.7785
	11.151	23.266		16.3657	0.2025
	5.179	14.222		14.3765	-1.22875
	1.469	10.657		12.507	-0.91
	-2.241	15.686		13.0177	0.84025
	2.353	18.744		12.3618	3.28975
	1.093	19.063		11.6735	2.8185
	3.093	21.28		12.478	2.4595
	5.919	12.932		11.9525	3.8545
	7.064	20.642		12.7385	3.4525
	2.136	19.802		15.3652	1.13725
	1.339	19.106		16.5102	-0.102
	2.701	16.498		13.8438	0.27475
	1.759	17.556		11.5578	0.4705
	2.861	14.918		13.0215	1.49975
	4.252	16.729		13.2532	1.786
	3.948	14.034		13.4307	0.66625
	6.745	16.266		12.3003	-0.917
	10.281	22.86		8.4415	-2.9025
	1.064	12.86		7.9415	-0.7975
	-2.154	15.889		9.967	2.2715
	2.846	16.642		10.4055	2.181
	-2.038	18.787		8.938	2.44175
	4.585	17.845		6.61925	1.97425
	0.977	23.729		6.9455	0.9235
	2.832	22.874		11.8078	3.1915
	0.208	18.961		18.3367	5.34725
	-2.936	16.729		20.768	4.4705
	-0.386	19.642		17.0975	5.68075
	-2.618	16.135		12.2858	6.33675
	1.89	13.208		11.4418	3.7245
	-1.052	18.7		11.1158	2.89825
	2.455	18.686		9.681	1.003
	4.411	11.353		12.0723	-1.12025
	7.194	25.179		13.8255	0.45975
	5.658	18.092		11.608	1.391
	0.411	16.918		9.9995	1.6735
	-1.299	19.222		12.7822	2.4815
	9.73	24.57		13.036	1.5215
	1.31	18.324		10.065	0.844
	0.904	22.338		12.5868	2.362
	-1.965	10.251		13.9418	2.23875
	4.556	22.744		11.706	0.2135
	1.6	19.512		9.724	-1.62325
	6.571	15.845		9.0465	-2.22825
	1.252	24.86		10.985	1.60125
	-1.487	18.816		10.851	4.3945
	1.701	15.584		10.7025	2.978
	1.252	12.077		12.5215	1.99275
	-0.748	27.628		11.315	0.80075
	0.281	17.947		9.9705	1.2355
	-3.676	9.527		10.463	2.74275
	3.498	23.932		10.684	2.24275
	1.078	16.86		10.608	3.3405
	-2.545	18.251		10.2713	4.18825
	1.295	14.237		9.90925	0.612
	-0.792	16.469		9.59425	-2.2685
	0.948	19.048		9.75725	-2.81175
	4.6	16.527		11.5252	-0.93475
	4.513	20.642		12.7027	2.99275
	7.948	21.237		11.5288	3.20625
	4.933	18.802		10.0467	1.35825
	4.064	21.845		9.909	0.52875
	-1.313	15.86		11.996	0.37675
	6.904	23.396		12.3112	0.489
	1.281	18.048		9.56475	0.29325
	-0.096	12.932		7.5105	-1.91325
	-1.719	22.15		7.45625	-3.22475
	6.035	20.744		10.7423	-0.88775
	0.89	19.164		13.5973	0.779
	5.585	21.28		12.0285	2.56875
	-0.878	14.758		11.1625	3.64825
	-2.11	21.86		14.1263	1.7895
	-0.299	15.671		16.17	1.3835
	4.846	18.266		13.9455	2.43425
	-1.647	15.179		10.2933	-0.20675
	-0.98	17.541		9.623	-2.20325
	-1.574	24.802		11.0975	1.64075
	2.049	20.309		10.9198	4.054
	0.904	12.469		12.1735	2.2825
	1.353	14.816		13.1303	1.047
	-1.661	17.671		10.123	0.80775
	-2.661	13.7		7.9815	0.3765
	-1.951	15.642		5.81475	0.257
	-0.792	18.019		6.583	2.7245
	5.469	22.57		11.159	4.74975
	-0.139	19.135		11.043	2.554
	6.745	16.932		8.42	1.98175
	9.194	21.599		8.949	3.39125
	4.469	13.729		8.83675	2.46
	0.716	10.295		6.86225	-0.09075
	5.165	13.758		8.46725	-1.0835
	4.151	18.454		11.4925	0.58325
	3.295	17.628		12.1555	1.547
	1.006	17.106		12.6155	1.1955
	4.107	18.86		11.6553	-0.272
	6.469	14.164		8.7495	-1.27575
	4.571	15.802		7.81475	0.496
	0.266	19.251		9.75325	3.5575
	2.774	14.338		12.101	5.2785
	3.136	17.44		15.0862	4.543
	3.745	21.802		16.4232	2.8545
	4.846	21.715		13.1628	1.53575
	2.861	14.425		11.4238	2.322
	1.498	9.411		12.3655	3.38725
	0.093	18.845		12.0247	1.60475
	0.759	14.758		10.4522	0.3365
	-0.11	17.222		9.05375	0.07925
	9.556	14.584		10.3112	0.1555
	3.687	19.28		11.623	2.2715
	9.281	20.903		11.4563	3.63375
	3.295	13.309		11.7205	1.996
	6.44	21.077		10.0862	0.7025
	0.919	13.135		7.36525	0.851
	1.397	15.034		6.34375	0.56475
	3.614	15.28		8.3405	0.688
	-1.096	14.903		12.4202	1.275
	0.266	15.584		13.344	1.22425
	2.658	13.816		11.1047	1.181
	5.179	17.266		9.7205	1.86225
	-2.125	15.527		9.438	1.659
	-5.748	10.019		10.6883	2.56475
	2.948	13.715		11.5542	5.623
	2.817	17.048		8.99975	5.6845
	4.875	20.729		7.7205	2.9885
	-1.487	16.671		9.15525	0.89075
	0.962	22.28		10.7315	0.4165
	-4.183	14.918		11.594	2.9455
	0.049	17.077		11.67	4.2315
	-0.777	13.787		10.8835	2.3075
	2.919	19.99		9.03575	1.94525
	-0.893	11.44		9.39825	2.76425
	0.469	8.367		11.0105	3.17
	3.02	17.918		10.5902	3.025
	4.469	10.469		12.007	2.64825
	2.093	18.092		15.4998	2.333
	5.324	21.642		14.1593	0.025
	-1.98	19.686		10.0578	-1.225
	5.455	12.816		10.4525	1.322
	2.962	15.787		13.0465	1.92325
	6.049	23.135		10.869	-0.63475
	7.89	13.758		7.8005	-2.05125
	-5.081	17.584		10.9093	-1.21425
	2.73	16.469		14.8547	-0.207
	2.672	13.541		14.0177	0.17
	3.295	17.019		11.2025	-0.26825
	1.078	20.469		9.3475	-2.7285
	2.194	17.338		9.14475	-3.20325
	5.324	20.425		9.65925	-0.94225
	1.585	14.208		9.13	-0.13425
	3.208	18.744		8.26025	0.525
	0.629	11.686		9.793	1.909
	-1.241	15.845		12.804	1.9055
	-0.255	16.135		14.507	0.90575
	6.774	16.28		14.4745	1.837
	-0.183	18.613		12.1013	3.71725
	2.89	19.019		9.38	3.949
	-0.777	13.932		9.1045	3.96725
	-1.009	18.671		11.1372	5.11225
	-1.357	14.005		12.246	4.902
	3.266	18.729		9.9815	0.54325
	0.513	12.99		7.862	-2.0475
	5.861	18.063		8.19875	0.666
	0.411	15.932		8.59725	2.387
	3.107	17.584		8.14825	0.543
	6.223	20.469		9.9345	-1.79375
	6.324	20.106		13.728	-2.18125
	1.107	18.295		15.6557	-0.221
	0.527	15.715		14.6448	2.0905
	1.295	11.657		11.2387	3.4815
	2.368	15.483		10.246	3.38725
	0.527	17.411		12.3908	1.739
	0.136	15.527		10.945	0.884
	1.382	13.353		9.5285	1.804
	2.817	16.208		11.286	3.39425
	-0.212	22.744		10.7317	2.51025
	12.846	19.874		10.9165	1.04325
	1.107	13.874		10.9672	1.25725
	4.643	17.715		8.949	-0.00725
	-1.574	22.034		9.717	-0.2175
	1.643	20.816		9.0105	1.99975
	3.774	18.874		7.73875	2.478
	8.527	22.976		9.63	1.1375
	4.122	22.758		10.746	1.2825
	-0.951	23.222		11.7027	2.27525
	-1.864	11.396		13.3695	0.6375
	-0.386	20.483		12.4455	-1.772
	-1.473	13.396		9.652	-1.102
	-0.56	22.686		8.46	1.51375
	2.006	23.034		9.88375	1.61175
	-2.023	15.831		10.3328	1.0575
	21.701	2.106		8.6805	1.78925
	36.571	4.816		8.224	-0.67075
	38.078	1.599		9.61175	-2.67775
	19.846	-1.401		12.1988	-0.3445
	27.962	-1.995		13.503	1.72075
	19.484	2.961		12.1335	2.02875
	28.759	2.208		8.601	2.40175
	16.266	-1.56		7.84725	2.18425
	31.339	-3.937		11.003	0.898
	30.006	6.773		11.0068	0.601
	29.73	6.512		9.543	1.95975
	31.6	3.527		9.57925	1.822
	36.614	0.164		8.49975	-0.428
	22.165	-1.444		6.5905	-1.43875
	30.788	2.961		5.8695	-1.89525
	35.368	-3.01		8.2535	-1.93525
	27.02	4.628		10.9708	0.6155
	27.324	3.092		9.2895	2.67
	25.817	0.932		5.3945	0.3475
	30.991	4.657		5.543	-1.939
	28.179	-2.155		8.06125	0.119
	33.064	4.266		9.7315	1.641
	29.919	-0.691		10.1263	1.4635
	29.223	2.324		9.2025	1.92
	24.571	3.193		9.344	1.6735
	31.223	-0.068		10.1192	0.02475
	29.179	-3.227		10.1372	-0.78325
	32.585	-1.792		8.61175	0.2605
	26.324	-1.517		7.89075	0.17025
	35.672	4.411		9.94175	-0.4385
	22.933	5.005		13.2967	1.0215
	28.397	-0.082		14.0683	3.181
	34.948	0.99		11.6082	4.018
	29.527	3.077		9.083	2.43475
	31.89	0.396		8.351	0.721
	31.803	-2.676		9.95625	0.362
	31.484	1.7		12.21	0.6445
	21.02	-1.444		13.13	2.51425
	25.658	0.816		12.2965	4.304
	27.136	5.57		12.0213	3.84375
	28.846	0.353		10.333	1.1555
	33.006	3.903		8.22075	-1.08
	36.397	2.976		8.68075	-0.89175
	33.803	3.44		9.17325	0.159
	28.904	-0.053		10.6695	1.402
	39.078	2.135		12.9232	2.663
	23.266	10.048		12.9778	1.31875
	22.397	-1.285		13.0358	-0.1415
	24.382	2.15		12.3402	2.7715
	41.02	5.657		8.489	4.85475
	32.006	-3.024		6.902	4.2785
	31.324	6.947		9.31475	4.09
	26.469	3.57		11.1225	2.5285
	23.498	6.498		8.898	0.31125
	34.208	5.15		7.141	-0.091
	33.324	-1.473		9.57575	0.97775
	31.89	4.932		11.2423	1.52125
	28.73	0.266		9.64425	-0.4025
	29.353	1.164		8.33275	-2.69225
	20.614	0.367		10.1265	-1.90975
	23.295	5.164		11.9055	0.1445
	32.252	0.845		10.4055	0.0105
	33.89	2.063		8.51775	-0.27925
	31.832	2.15		7.78225	1.45625
	35.165	0.976		4.41275	0.9635
	37.31	0.309		2.1625	-1.33725
	19.107	3.527		4.7855	-0.83
	29.266	1.932		7.86175	0.873
	24.208	0.715		9.19525	-0.70675
	23.542	-0.502		8.97775	-2.8445
	21.295	-0.097		7.64075	0.42725
	27.035	0.338		8.159	3.98875
	32.788	3.556		10.8872	2.648
	30.208	0.686		11.0102	0.869
	20.788	2.338		9.1335	0.7025
	30.194	9.005		9.6445	0.35125
	18.295	-1.531		12.4488	0.0215
	38.165	10.599		13.485	-0.46425
	25.919	2.889		10.7423	0.8835
	7.904	2.787		8.0285	2.99225
	-2.821	-3.72		8.6845	1.45975
	-1.951	-0.778		9.5215	-0.45675
	-1.893	-2.053		7.38	0.57575
	-0.284	-0.416		4.7965	1.7785
	6.658	2.28		3.706	0.94525
	21.89	3.019		5.0395	0.4345
	41.122	0.063		8.7715	1.27525
	26.6	-0.198		10.4853	2.0505
	39.469	10.164		8.88	1.177
	48.194	-0.155		7.1555	-1.38825
	17.498	8.005		8.43475	-1.1525
	24.716	3.961		11.4275	1.094
	23.629	4.599		13.228	1.99975
	34.527	1.845		15.5865	3.26075
	26.556	-1.691		17.1155	2.6195
	26.31	1.005		15.9488	-0.21025
	26.02	-0.662		13.9923	-0.761
	44.397	-0.937		13.0395	1.14475
	22.658	0.222		12.6735	3.36575
	21.194	0.802		11.1372	3.9345
	26.6	0.483		10.17	4.31125
	18.527	1.193		11.181	8.17725
	34.353	-1.3		8.181	12.4418
	39.324	5.686		0.88375	16.101
	10.469	0.527		-2.92075	20.0392
	34.716	14.686		-3.75775	20.2785
	12.846	2.57		-3.004	19.6955
	0.107	2.309		-1.71025	17.1375
	-2.27	3.005		-1.31175	13.5938
	-0.792	9.237		-1.881	16.3438
	2.31	-1.647		-3.93175	20.5285
	-1.371	1.324		-3.6525	20.7712
	-2.792	3.44		-1.475	17.1917
	-4.56	6.411		-0.696	15.6955
	1.861	3.802		-1.86625	20.518
	0.208	4.222		-4.68175	25.4275
	-5.531	3.889		-5.97175	27.8515
	2.266	1.382		-4.37025	28.4275
	4.064	7.338		-3.7905	24.2967
	-4.661	0.512		-5.55125	19.6807
	-3.777	1.019		-3.90625	20.1627
	0.035	4.758		0.7895	22.9415
	0.832	0.121		0.39825	21.5102
	-3.56	2.483		-2.033	13.8475
	-3.777	1.584		-2.66325	9.72075
	-2.081	6.57		-3.91675	12.246
	-5.11	1.425		-3.70325	14.065
	-4.415	5.077		-1.91725	15.4347
	1.542	4.005		0.793	18.1268
	-3.009	6.193		1.96	18.3367
	-4.11	4.512		-0.63425	14.583
	-0.69	7.034		-2.283	12.4563
	-0.299	4.15		-1.34075	13.7353
	-1.994	5.773		-0.55075	15.0902
	2.049	-1.937		-1.022	16.8803
	0.252	0.889		-1.85925	18.3622
	-1.806	0.367		-0.57675	17.6593
	-3.096	-5.358		0.84725	17.7063
	-2.096	-2.401		-0.62	18.9307
	0.31	-2.372		-2.504	18.061
	-3.444	-2.097		-3.6235	17.2495
	3.788	0.599		-4.656	14.7425
	-5.139	-3.372		-4.2465	13.257
	-4.531	3.671		-3.4205	14.438
	-2.371	2.135		-3.02225	9.746
	1.498	4.179		-1.8195	7.797
	-3.531	4.034		-1.35575	11.9817
	-0.4	3.222		-1.47525	11.822
	-1.719	0.309		-1.04025	9.514
	0.556	2.266		-1.95325	7.7715
	2.252	2.599		-3.70325	7.12675
	2.846	6.729		-3.46025	10.8513
	-2.936	0.498		-3.3115	13.9995
	2.266	1.454		-4.261	13.0175
	2.919	-0.227		-3.37	12.2568
	-1.792	-0.865		-1.87	13.228
	-0.661	-3.807		-1.6055	17.1157
	4.44	0.527		-1.80125	17.8693
	-2.56	0.019		-2.09125	11.3257
	-3.574	-1.676		-2.4245	9.025
	-1.342	0.353		-1.051	14.1082
	-1.632	-4.256		0.0795	15.2315
	-3.168	-1.285		-1.26475	12.1918
	2.165	6.092		-2.78275	14.7532
	-1.357	-0.053		-2.6595	14.6807
	2.353	1.758		-0.6995	10.699
	-0.574	-3.488		-0.6345	13.373
	-0.154	3.903		-2.62	16.2787
	-3.371	-2.082		-3.946	14.9525
	-3.212	-1.358		-4.6455	14.7858
	1.629	-1.01		-5.037	17.4125
	-0.589	-1.024		-4.7145	19.6227
	2.687	0.237		-2.96075	20.0433
	2.904	5.454		-1.2795	16.315
	3.093	5.7		-1.66725	11.0685
	7.035	5.44		-2.515	11.2387
	-0.647	-0.546		-0.167	15.4238
	-0.878	-2.502		1.275	17.4275
	2.353	4.498		-1.43875	16.1917
	-0.255	2.266		-2.38075	18.456
	-1.56	1.744		-1.0765	22.8618
	-0.632	-0.865		-2.2505	20.985
	-0.487	-0.778		-3.1925	18.0648
	0.006	1.179		-1.63075	20.322
	1.165	2.802		-0.5655	21.9127
	-1.719	1.164		-0.515	19.1193
	-1.821	-1.401		-0.91375	17.2495
	0.324	3.758		-1.17825	18.5212
	-0.444	3.309		-1.38825	18.9453
	1.875	2.005		-2.54375	16.9417
	1.194	0.57		-2.587	16.5105
	-0.241	0.527		-0.63425	17.0212
	-0.313	1.932		-0.89175	12.2208
	-1.618	-0.705		-3.551	6.3875
	-2.835	-1.618		-4.6995	7.072
	3.774	3.454		-4.16	13.5392
	1.484	-1.285		-4.87025	15.7568
	5.339	2.584		-5.8265	17.427
	-3.676	6.077		-5.56175	19.8618
	-3.632	-0.111		-3.848	14.4887
	0.817	-0.256		-1.24675	13.6845
	0.223	0.86		-1.7905	17.4273
	3.745	4.077		-2.624	15.6807
	-2.415	2.802		0.05375	16.0792
	-1.052	-3.763		0.681	18.554
	0.948	6.266		-2.4675	17.6953
	-1.545	1.077		-3.65975	17.6337
	-3.849	-2.053		-2.10175	19.8803
	-1.009	0.7		-1.388	20.0865
	-5.444	-3.314		-0.4605	18.637
	2.194	5.686		1.92725	20.7312
	-3.835	3.454		0.7495	19.2712
	-1.284	-1.097		-2.3375	9.891
	-4.603	2.628		-2.92425	1.56125
	5.397	5.15		-3.99675	4.3255
	0.89	-0.256		-4.88075	16.3182
	-3.835	0.642		-3.80825	24.67
	0.078	3.816		-2.9715	23.518
	-0.907	2.063		-3.09475	17.5577
	-1.444	4.729		-3.38825	14.17
	-4.849	-4.691		-3.66725	14.554
	2.165	1.584		-2.64525	17.967
	0.339	-1.14		-0.558	18.996
	-0.125	0.976		-0.75725	14.6047
	-4.009	-1.995		-3.69225	12.6192
	3.281	0.541		-5.102	14.909
	-0.965	-1.618		-2.6855	14.0938
	-4.4	-5.865		-0.852	11.3438
	-4.139	-6.778		-3.04025	13.9017
	-1.618	0.193		-6.0295	18.0285
	-4.56	-4.531		-5.74325	23.1083
	4.745	4.599		-3.243	27.0685
	1.266	3.584		-2.29	24.8583
	3.672	2.237		-2.638	23.572
	0.078	-4.618		-2.1925	26.2243
	-8.792	-2.401		-2.11625	24.2063
	-1.734	-1.444		-2.388	16.7318
	-2.618	0.599		-2.06925	14.6375
	-3.864	-1.575		-3.25025	16.1155
	-1.864	-1.169		-2.64525	18.8472
	-4.067	2.15		0.5285	22.8328
	3.861	-2.343		0.4415	23.6008
	-3.647	-3.908		-0.44975	21.8908
	-2.676	-1.285		0.11925	18.8185
	-1.342	-2.531		0.34025	16.2785
	-3.299	-2.053		-0.60175	16.4705
	-2.763	-3.401		-3.1595	18.525
