# Supplementary material for: Kinetic regulation of kinesin’s two motor domains coordinates its stepping along microtubules
Source: eLife. 2025 Apr 17;14:RP106228. doi: 10.7554/eLife.106228 (PMC12005725; doi:10.7554/eLife.106228)
Supplement: Figure 4—figure supplement 2—source data 1. [file elife-106228-fig4-figsupp2-data1.xlsx]

## Sheet: Front head
mantATP binding trace	E236A-WT	WT front head
Time	Fl1	Fl2	Fl3
0.0001	4.7618	4.64034	4.72173
0.0002	4.78926	4.67744	4.67735
0.0003	4.76897	4.69997	4.73116
0.0004	4.75661	4.76683	4.78075
0.0005	4.76201	4.70235	4.71657
0.0006	4.75215	4.77721	4.83491
0.0007	4.82152	4.65623	4.74779
0.0008	4.7614	4.81361	4.65297
0.0009	4.78831	4.81795	4.75194
0.001	4.86202	4.74034	4.72624
0.0011	4.80318	4.73482	4.79784
0.0012	4.81441	4.84255	4.85521
0.0013	4.80388	4.79009	4.86263
0.0014	4.88719	4.86202	4.8582
0.0015	4.84862	4.8069	4.75487
0.0016	4.71474	4.84016	4.80745
0.0017	4.6927	4.76762	4.81718
0.0018	4.8824	4.85579	4.80602
0.0019	4.92687	4.90898	4.81099
0.002	4.90279	4.93965	4.78862
0.0021	4.90871	4.78636	4.96309
0.0022	4.91808	4.79341	4.9204
0.0023	4.9033	4.8452	4.81236
0.0024	4.86717	4.81972	4.90178
0.0025	4.86818	4.90794	5.03029
0.0026	4.98463	4.79405	4.89006
0.0027	4.89269	4.98988	4.87584
0.0028	4.90947	4.757	4.83385
0.0029	5.0349	4.90398	4.91325
0.003	4.9167	4.88265	4.85722
0.0031	4.9641	4.98402	4.81578
0.0032	4.91402	4.90111	4.87462
0.0033	4.93883	4.94212	5.07701
0.0034	5.02867	4.95018	4.85689
0.0035	4.91334	4.92311	4.9669
0.0036	4.91045	4.80376	4.94167
0.0037	5.01332	4.86116	4.92262
0.0038	4.95802	4.92647	4.89323
0.0039	4.91234	4.90968	4.89815
0.004	4.92915	4.92204	5.01384
0.0041	4.99876	4.97166	5.00343
0.0042	4.99724	4.86607	5.00444
0.0043	5.00386	4.99104	5.01222
0.0044	4.94869	4.84114	5.00569
0.0045	5.041	4.98567	4.92546
0.0046	5.05864	4.94621	5.00215
0.0047	5.02123	5.05531	4.92348
0.0048	5.00786	5.00041	5.02736
0.0049	4.97862	5.14189	5.09477
0.005	5.03877	5.00285	4.98378
0.0051	5.20686	4.89738	5.04546
0.0052	5.05006	5.00533	5.03331
0.0053	5.00276	4.87294	4.98433
0.0054	4.99092	4.94109	5.00319
0.0055	5.136	4.96422	5.02516
0.0056	5.07381	5.19801	5.09047
0.0057	5.04246	4.95167	5.03136
0.0058	5.06722	5.04362	4.95982
0.0059	5.07118	5.07381	5.11604
0.006	5.1317	5.04479	5.25087
0.0061	5.0544	5.09248	5.0703
0.0062	5.0399	5.02303	5.07878
0.0063	5.04317	5.05406	4.93977
0.0064	5.05867	4.84795	5.09773
0.0065	5.07741	5.01625	4.9886
0.0066	5.11403	5.00639	4.90556
0.0067	5.03807	5.04356	4.96159
0.0068	5.1335	5.18083	4.99803
0.0069	4.95375	4.99532	5.13856
0.007	5.04335	5.08067	5.13631
0.0071	5.11357	5.02129	5.0276
0.0072	5.20039	5.02324	5.04198
0.0073	5.16933	5.08763	5.04713
0.0074	5.08626	4.96104	5.0255
0.0075	5.19218	5.01869	4.90349
0.0076	5.07878	5.04701	5.06804
0.0077	5.04295	5.10567	5.07365
0.0078	5.12666	4.91133	5.18535
0.0079	5.15291	5.12465	5.06688
0.008	5.18974	5.07463	5.06865
0.0081	5.07768	5.15257	5.13445
0.0082	5.15587	5.21425	5.15453
0.0083	5.29381	5.05693	5.0598
0.0084	5.21208	5.06233	5.07103
0.0085	5.08269	5.12624	5.11272
0.0086	4.99867	5.04973	5.16182
0.0087	5.1649	5.29237	5.16392
0.0088	5.1609	5.20006	5.08318
0.0089	5.22874	5.07994	5.08818
0.009	5.04945	5.08876	5.19453
0.0091	5.11644	5.15294	5.08955
0.0092	5.14058	5.10289	5.02629
0.0093	5.22121	5.11037	5.05251
0.0094	5.1371	5.19716	5.12383
0.0095	5.10698	5.11089	5.18016
0.0096	5.30864	5.02998	5.11992
0.0097	5.28517	5.19237	5.11226
0.0098	5.18285	5.13313	5.1422
0.0099	5.15974	5.14653	5.13359
0.01	5.16649	5.22057	5.16338
0.0101	5.2119	5.10262	5.17104
0.0102	5.11479	5.10637	5.12398
0.0103	5.23598	5.16222	5.13286
0.0104	5.07622	5.22621	5.1158
0.0105	5.25938	5.15453	5.13371
0.0106	5.12974	5.11821	5.16081
0.0107	5.12825	5.17937	5.20662
0.0108	5.13521	5.06819	5.06151
0.0109	5.15599	5.25044	5.1693
0.011	5.17177	4.99315	5.0377
0.0111	5.26643	5.03664	5.13814
0.0112	5.1599	5.11879	5.13152
0.0113	5.20409	5.19716	5.17931
0.0114	5.22282	5.22743	5.09468
0.0115	5.27589	5.22475	5.07469
0.0116	5.17348	5.15309	5.07982
0.0117	5.16933	5.08113	5.13756
0.0118	5.23149	5.08943	5.11198
0.0119	5.12288	5.23772	5.06981
0.012	5.27843	5.18297	5.13371
0.0121	5.22755	5.27174	5.19731
0.0122	5.17821	5.33488	5.17647
0.0123	5.14378	5.02092	5.11272
0.0124	5.25978	5.05705	5.12926
0.0125	5.14388	5.04747	5.29085
0.0126	5.1468	5.27	5.13963
0.0127	5.02577	5.2408	5.19127
0.0128	5.32979	5.16124	5.26503
0.0129	5.24083	5.26277	5.24644
0.013	5.24538	5.18599	5.43242
0.0131	5.19463	5.24822	5.20287
0.0132	5.16615	5.17137	5.16283
0.0133	5.24214	5.08302	5.0172
0.0134	5.2234	5.24235	5.17357
0.0135	5.25703	5.13106	5.18098
0.0136	5.11763	5.22215	5.19829
0.0137	5.18202	5.14064	5.2083
0.0138	5.20253	5.20216	5.23024
0.0139	5.19908	5.12795	5.21156
0.014	5.2469	5.25334	5.11934
0.0141	5.16121	5.04097	5.07646
0.0142	5.1953	5.16011	5.09413
0.0143	5.21687	5.14299	5.26219
0.0144	5.28206	5.21214	5.33162
0.0145	5.2748	5.25752	5.06642
0.0146	5.17107	5.26802	5.226
0.0147	5.1993	5.21727	5.2744
0.0148	5.27882	5.20341	5.21333
0.0149	5.30092	5.20198	5.21648
0.015	5.22441	5.07564	5.01775
0.0151	5.30562	5.0956	5.21788
0.0152	5.20952	5.2625	5.1111
0.0153	5.12843	5.24577	5.18623
0.0154	5.20345	5.13646	5.2076
0.0155	5.20329	5.21169	5.16518
0.0156	5.27684	5.15605	5.12917
0.0157	5.22243	5.20143	5.24147
0.0158	5.21828	5.17171	5.24138
0.0159	5.19469	5.11806	5.18025
0.016	5.26265	5.22017	5.23683
0.0161	5.27065	5.17107	5.19356
0.0162	5.25246	5.27919	5.26866
0.0163	5.19023	5.24382	5.11183
0.0164	5.27434	5.12367	5.13634
0.0165	5.12096	5.25856	5.1096
0.0166	5.31416	5.19035	5.22994
0.0167	5.34093	5.28352	5.2137
0.0168	5.17189	5.17961	5.0601
0.0169	5.12956	5.19667	5.30019
0.017	5.27605	5.20223	5.11516
0.0171	5.19716	5.24998	5.23155
0.0172	5.10622	5.209	5.14372
0.0173	5.18529	5.24583	5.28346
0.0174	5.14043	5.25435	5.32536
0.0175	5.23988	5.17912	5.17253
0.0176	5.10072	5.10811	5.18687
0.0177	5.27956	5.14363	5.20235
0.0178	5.25856	5.1494	5.19972
0.0179	5.16658	5.13854	5.09486
0.018	5.17076	5.24721	5.11446
0.0181	5.26356	5.20012	5.21153
0.0182	5.19963	5.28252	5.1537
0.0183	5.28303	5.19408	5.28233
0.0184	5.20985	5.28651	5.24883
0.0185	5.18095	5.18294	5.16017
0.0186	5.21101	5.11574	5.12254
0.0187	5.23937	5.18523	5.25731
0.0188	5.25261	5.18434	5.26729
0.0189	5.20012	5.15611	5.08598
0.019	5.31191	5.20921	5.25648
0.0191	5.25508	5.07872	5.33415
0.0192	5.24785	5.30595	5.32469
0.0193	5.19637	5.2184	5.33885
0.0194	5.13289	5.2075	5.15248
0.0195	5.24736	5.19603	5.14955
0.0196	5.27052	5.19951	5.16451
0.0197	5.28517	5.28886	5.17314
0.0198	5.30614	5.22737	5.11192
0.0199	5.30928	5.24855	5.17827
0.02	5.23537	5.15569	5.22804
0.0201	5.22871	5.29872	5.21999
0.0202	5.2112	5.30086	5.19087
0.0203	5.23741	5.11488	5.21474
0.0204	5.34261	5.2346	5.06642
0.0205	5.22923	5.17863	5.21263
0.0206	5.23225	5.35075	5.3253
0.0207	5.2408	5.31117	5.32784
0.0208	5.25899	5.22121	5.2596
0.0209	5.3586	5.16362	5.11568
0.021	5.25185	5.24736	5.20473
0.0211	5.188	5.19707	5.29964
0.0212	5.25847	5.21788	5.13777
0.0213	5.26094	5.22917	5.22584
0.0214	5.25218	5.30846	5.28383
0.0215	5.33754	5.09923	5.32671
0.0216	5.24602	5.20772	5.37389
0.0217	5.37804	5.26354	5.18748
0.0218	5.26527	5.38591	5.3156
0.0219	5.20521	5.21284	5.32466
0.022	5.18031	5.34431	5.21995
0.0221	5.30742	5.27827	5.25719
0.0222	5.14934	5.25954	5.23613
0.0223	5.17763	5.24696	5.18013
0.0224	5.26115	5.13033	5.15199
0.0225	5.25444	5.15968	5.24562
0.0226	5.16142	5.27315	5.27351
0.0227	5.12089	5.25975	5.2809
0.0228	5.27165	5.26985	5.09398
0.0229	5.12676	5.26448	5.30418
0.023	5.24214	5.29002	5.2253
0.0231	5.24751	5.22963	5.23631
0.0232	5.19179	5.1953	5.22453
0.0233	5.20702	5.235	5.29427
0.0234	5.31557	5.23497	5.11888
0.0235	5.25188	5.26219	5.12322
0.0236	5.28441	5.16746	5.18642
0.0237	5.40477	5.3466	5.12901
0.0238	5.31096	5.2954	5.21144
0.0239	5.31859	5.22649	5.26683
0.024	5.23436	5.218	5.14885
0.0241	5.33626	5.30769	5.334
0.0242	5.23073	5.21339	5.16441
0.0243	5.30104	5.29527	5.32027
0.0244	5.40053	5.10579	5.2686
0.0245	5.32661	5.19273	5.23244
0.0246	5.25661	5.1765	5.27101
0.0247	5.25603	5.34255	5.24364
0.0248	5.22508	5.1974	5.17137
0.0249	5.25258	5.21062	5.17253
0.025	5.2701	5.26866	5.04958
0.0251	5.24165	5.18526	5.15999
0.0252	5.2924	5.25819	5.32137
0.0253	5.16856	5.17052	5.18172
0.0254	5.31932	5.24461	5.24635
0.0255	5.17204	5.33363	5.12913
0.0256	5.2093	5.21159	5.27092
0.0257	5.30174	5.27791	5.28084
0.0258	5.15517	5.35594	5.2531
0.0259	5.31755	5.1899	5.30077
0.026	5.27037	5.25709	5.30955
0.0261	5.11876	5.31218	5.25691
0.0262	5.18562	5.20351	5.24074
0.0263	5.31578	5.30473	5.27113
0.0264	5.32851	5.21504	5.24281
0.0265	5.22798	5.25948	5.28444
0.0266	5.28914	5.23515	5.21541
0.0267	5.29167	5.2112	5.18074
0.0268	5.2993	5.19658	5.25203
0.0269	5.34599	5.26216	5.16728
0.027	5.26671	5.2766	5.15584
0.0271	5.16252	5.37639	5.2422
0.0272	5.22969	5.30275	5.33714
0.0273	5.2263	5.2028	5.20897
0.0274	5.21513	5.28017	5.21593
0.0275	5.3206	5.21498	5.21785
0.0276	5.2704	5.2812	5.31722
0.0277	5.28499	5.30562	5.25407
0.0278	5.313	5.22365	5.37984
0.0279	5.33162	5.21596	5.08089
0.028	5.1956	5.22755	5.23366
0.0281	5.32463	5.32426	5.23998
0.0282	5.27238	5.26991	5.26045
0.0283	5.28862	5.15315	5.22566
0.0284	5.213	5.35176	5.17506
0.0285	5.14415	5.22707	5.1786
0.0286	5.28404	5.40636	5.21056
0.0287	5.34923	5.34038	5.252
0.0288	5.31093	5.27171	5.36263
0.0289	5.23558	5.43346	5.20836
0.029	5.34804	5.12752	5.33031
0.0291	5.25801	5.1906	5.22597
0.0292	5.36397	5.16527	5.35976
0.0293	5.34865	5.26408	5.35487
0.0294	5.15993	5.15092	5.27592
0.0295	5.29475	5.2664	5.22466
0.0296	5.30837	5.29149	5.28648
0.0297	5.26036	5.23927	5.22731
0.0298	5.38039	5.26222	5.35609
0.0299	5.28743	5.33714	5.26665
0.03	5.3192	5.16405	5.25352
0.0301	5.35872	5.2231	5.32524
0.0302	5.14619	5.29906	5.26323
0.0303	5.19493	5.26637	5.28224
0.0304	5.23912	5.33122	5.26137
0.0305	5.25322	5.26073	5.30739
0.0306	5.15346	5.28627	5.29628
0.0307	5.32054	5.25829	5.24272
0.0308	5.2086	5.30449	5.26686
0.0309	5.1732	5.36232	5.15007
0.031	5.27712	5.31331	5.30669
0.0311	5.25591	5.27443	5.26125
0.0312	5.14015	5.1599	5.2751
0.0313	5.38454	5.28673	5.30327
0.0314	5.32234	5.2487	5.32167
0.0315	5.26259	5.27516	5.23527
0.0316	5.31837	5.27538	5.27748
0.0317	5.30617	5.30299	5.36833
0.0318	5.36327	5.25411	5.34483
0.0319	5.24327	5.38664	5.2202
0.032	5.24565	5.27034	5.19261
0.0321	5.2318	5.2776	5.20226
0.0322	5.23732	5.17213	5.31911
0.0323	5.40901	5.24333	5.25411
0.0324	5.23305	5.35344	5.21529
0.0325	5.36687	5.13393	5.19807
0.0326	5.42244	5.11266	5.22325
0.0327	5.2954	5.26802	5.33452
0.0328	5.29753	5.19264	5.28716
0.0329	5.35179	5.15749	5.11275
0.033	5.22252	5.26546	5.26985
0.0331	5.15337	5.30366	5.23085
0.0332	5.24675	5.23888	5.33363
0.0333	5.25774	5.3925	5.14369
0.0334	5.27675	5.21858	5.30952
0.0335	5.36046	5.2512	5.36534
0.0336	5.21584	5.26018	5.24855
0.0337	5.23497	5.22945	5.16524
0.0338	5.26732	5.28392	5.19521
0.0339	5.15391	5.24864	5.28813
0.034	5.33766	5.19588	5.22319
0.0341	5.32726	5.16423	5.18712
0.0342	5.36797	5.2227	5.21339
0.0343	5.25868	5.37694	5.18864
0.0344	5.19792	5.39916	5.23064
0.0345	5.44591	5.22932	5.39647
0.0346	5.3044	5.25258	5.29619
0.0347	5.28899	5.38869	5.20644
0.0348	5.32945	5.25597	5.33409
0.0349	5.43953	5.1552	5.35097
0.035	5.24464	5.30403	5.26308
0.0351	5.39201	5.34172	5.30129
0.0352	5.2979	5.21336	5.3235
0.0353	5.34688	5.30275	5.22481
0.0354	5.31395	5.27827	5.24245
0.0355	5.36296	5.30959	5.22234
0.0356	5.34572	5.31001	5.3148
0.0357	5.40944	5.30901	5.30879
0.0358	5.37056	5.25984	5.13719
0.0359	5.20149	5.16475	5.18809
0.036	5.15678	5.2122	5.29274
0.0361	5.19981	5.2285	5.33119
0.0362	5.41814	5.35069	5.17924
0.0363	5.26817	5.22676	5.25316
0.0364	5.17866	5.28239	5.22478
0.0365	5.30101	5.20525	5.40767
0.0366	5.03883	5.24501	5.35442
0.0367	5.40889	5.27425	5.21373
0.0368	5.21803	5.26119	5.18077
0.0369	5.24681	5.29082	5.31212
0.037	5.37923	5.244	5.35683
0.0371	5.31432	5.35933	5.34856
0.0372	5.31383	5.3232	5.26222
0.0373	5.27165	5.36186	5.25697
0.0374	5.25346	5.21394	5.26161
0.0375	5.3239	5.32201	5.07958
0.0376	5.18416	5.2462	5.30946
0.0377	5.37556	5.19777	5.27019
0.0378	5.27925	5.11784	5.36146
0.0379	5.24757	5.33095	5.16643
0.038	5.37456	5.27211	5.20741
0.0381	5.1639	5.27541	5.25407
0.0382	5.23204	5.12279	5.27309
0.0383	5.31349	5.2982	5.35286
0.0384	5.21901	5.30937	5.3177
0.0385	5.32497	5.21635	5.22484
0.0386	5.28026	5.44102	5.24696
0.0387	5.27205	5.30711	5.21056
0.0388	5.31428	5.35951	5.28587
0.0389	5.31407	5.20415	5.32017
0.039	5.32649	5.38973	5.15654
0.0391	5.23518	5.30595	5.20866
0.0392	5.37752	5.22142	5.28267
0.0393	5.35912	5.3293	5.32979
0.0394	5.38387	5.40337	5.28752
0.0395	5.36678	5.34807	5.42326
0.0396	5.27449	5.17635	5.36214
0.0397	5.38332	5.28322	5.25462
0.0398	5.4077	5.27492	5.29036
0.0399	5.295	5.28969	5.36269
0.04	5.32344	5.43697	5.35283
0.0401	5.23409	5.23839	5.24065
0.0402	5.34047	5.21596	5.3383
0.0403	5.2122	5.03975	5.19298
0.0404	5.32057	5.28093	5.21501
0.0405	5.22029	5.18895	5.29869
0.0406	5.46632	5.32381	5.14525
0.0407	5.3217	5.33247	5.22902
0.0408	5.27324	5.28029	5.29109
0.0409	5.41545	5.20375	5.32231
0.041	5.4406	5.36791	5.2108
0.0411	5.31886	5.24312	5.35979
0.0412	5.38136	5.24062	5.29924
0.0413	5.25343	5.21486	5.23604
0.0414	5.29857	5.20155	5.25581
0.0415	5.29768	5.37782	5.28841
0.0416	5.32127	5.2578	5.33971
0.0417	5.33272	5.3456	5.17751
0.0418	5.43468	5.20442	5.21425
0.0419	5.34566	5.23979	5.35692
0.042	5.33745	5.20091	5.25261
0.0421	5.31685	5.21544	5.20186
0.0422	5.31062	5.29317	5.21687
0.0423	5.46605	5.16212	5.12724
0.0424	5.1649	5.35539	5.24391
0.0425	5.29503	5.25484	5.19722
0.0426	5.36998	5.27293	5.27547
0.0427	5.27281	5.23982	5.38469
0.0428	5.33299	5.32784	5.27339
0.0429	5.33247	5.24818	5.22105
0.043	5.29787	5.26326	5.15596
0.0431	5.31697	5.27806	5.3036
0.0432	5.30574	5.26231	5.29598
0.0433	5.33684	5.23619	5.30623
0.0434	5.33159	5.29378	5.22649
0.0435	5.33495	5.17448	5.33693
0.0436	5.29488	5.3398	5.34471
0.0437	5.31108	5.31252	5.35359
0.0438	5.28502	5.33543	5.16194
0.0439	5.30519	5.23348	5.248
0.044	5.32667	5.41219	5.29393
0.0441	5.29317	5.21834	5.17387
0.0442	5.30318	5.23918	5.2542
0.0443	5.25984	5.25002	5.12038
0.0444	5.26695	5.25993	5.27937
0.0445	5.30629	5.32667	5.21257
0.0446	5.36412	5.25444	5.3177
0.0447	5.36394	5.49589	5.29655
0.0448	5.33989	5.31114	5.39711
0.0449	5.34563	5.29479	5.31874
0.045	5.33455	5.30525	5.14598
0.0451	5.4142	5.17149	5.32579
0.0452	5.34206	5.29158	5.35982
0.0453	5.28883	5.23558	5.18327
0.0454	5.39403	5.26173	5.33147
0.0455	5.30058	5.1989	5.19664
0.0456	5.42616	5.24202	5.26417
0.0457	5.26866	5.39156	5.19432
0.0458	5.22557	5.24345	5.27354
0.0459	5.38676	5.28618	5.34862
0.046	5.43443	5.34953	5.34068
0.0461	5.31548	5.29662	5.24229
0.0462	5.30574	5.29747	5.38734
0.0463	5.25908	5.3134	5.31706
0.0464	5.28838	5.24629	5.231
0.0465	5.42741	5.16637	5.2942
0.0466	5.40355	5.25069	5.35268
0.0467	5.29045	5.36229	5.23296
0.0468	5.40047	5.18156	5.24791
0.0469	5.51323	5.22166	5.38014
0.047	5.24745	5.33452	5.27861
0.0471	5.27959	5.18071	5.27617
0.0472	5.3737	5.31419	5.30937
0.0473	5.47264	5.29448	5.26405
0.0474	5.34462	5.11739	5.22627
0.0475	5.2935	5.34828	5.21892
0.0476	5.33641	5.24092	5.32286
0.0477	5.19701	5.2766	5.31245
0.0478	5.27843	5.2354	5.30965
0.0479	5.28731	5.17412	5.26396
0.048	5.28877	5.33281	5.26463
0.0481	5.44994	5.43016	5.3932
0.0482	5.30971	5.25261	5.29481
0.0483	5.51121	5.17848	5.28108
0.0484	5.30739	5.213	5.35829
0.0485	5.35814	5.30696	5.28947
0.0486	5.22798	5.41658	5.37889
0.0487	5.43333	5.34853	5.2411
0.0488	5.36437	5.20567	5.40868
0.0489	5.35622	5.24284	5.31859
0.049	5.43169	5.2523	5.28072
0.0491	5.34798	5.31325	5.25108
0.0492	5.21623	5.2657	5.34804
0.0493	5.36339	5.32414	5.42497
0.0494	5.33195	5.33885	5.312
0.0495	5.35252	5.42195	5.44005
0.0496	5.40437	5.35689	5.34468
0.0497	5.30525	5.34767	5.22816
0.0498	5.31291	5.31841	5.33583
0.0499	5.29811	5.2444	5.42262
0.05	5.32677	5.40114	5.31834
0.0501	5.34431	5.30785	5.29158
0.0502	5.17455	5.33339	5.22688
0.0503	5.30187	5.28712	5.43037
0.0504	5.36333	5.31871	5.32149
0.0505	5.30067	5.3549	5.37318
0.0506	5.3726	5.28035	5.34923
0.0507	5.29021	5.36616	5.29479
0.0508	5.50075	5.3232	5.23204
0.0509	5.30251	5.36769	5.24361
0.051	5.41237	5.35472	5.30855
0.0511	5.31969	5.22981	5.3304
0.0512	5.31862	5.33574	5.27757
0.0513	5.23759	5.334	5.14906
0.0514	5.22371	5.26778	5.26888
0.0515	5.35033	5.21269	5.44606
0.0516	5.38219	5.41881	5.21965
0.0517	5.26369	5.29509	5.32326
0.0518	5.32738	5.32976	5.24281
0.0519	5.35094	5.26125	5.41155
0.052	5.36308	5.34413	5.18507
0.0521	5.36137	5.32665	5.36745
0.0522	5.35774	5.38905	5.22411
0.0523	5.35558	5.29134	5.28334
0.0524	5.25862	5.27592	5.32548
0.0525	5.35097	5.32759	5.29387
0.0526	5.45296	5.18556	5.30251
0.0527	5.2466	5.30031	5.2719
0.0528	5.22243	5.35265	5.17101
0.0529	5.33232	5.35271	5.27031
0.053	5.31868	5.27458	5.32045
0.0531	5.29158	5.1761	5.29918
0.0532	5.26671	5.40846	5.35072
0.0533	5.36717	5.3008	5.42598
0.0534	5.2769	5.26958	5.20741
0.0535	5.31065	5.33827	5.32063
0.0536	5.29018	5.3528	5.40065
0.0537	5.25761	5.36366	5.26756
0.0538	5.27107	5.17909	5.33379
0.0539	5.30046	5.35835	5.22865
0.054	5.49174	5.22069	5.22783
0.0541	5.18523	5.34343	5.22264
0.0542	5.32539	5.13063	5.22896
0.0543	5.4211	5.36424	5.26753
0.0544	5.37285	5.35506	5.35823
0.0545	5.3311	5.4493	5.41756
0.0546	5.3297	5.21419	5.38878
0.0547	5.282	5.24718	5.34471
0.0548	5.24135	5.19243	5.39876
0.0549	5.39247	5.40868	5.36006
0.055	5.27504	5.40385	5.26662
0.0551	5.28587	5.30916	5.40297
0.0552	5.36018	5.41304	5.34807
0.0553	5.33434	5.36205	5.41392
0.0554	5.26143	5.2697	5.2411
0.0555	5.35466	5.26643	5.36266
0.0556	5.4312	5.1736	5.36571
0.0557	5.27437	5.38527	5.31059
0.0558	5.3134	5.4399	5.23415
0.0559	5.27712	5.36308	5.2523
0.056	5.41652	5.21693	5.32213
0.0561	5.26515	5.38817	5.36131
0.0562	5.36659	5.28038	5.3596
0.0563	5.30382	5.32423	5.27062
0.0564	5.36598	5.33003	5.17372
0.0565	5.26173	5.39623	5.36864
0.0566	5.32423	5.34197	5.27519
0.0567	5.26381	5.37691	5.26381
0.0568	5.23292	5.21306	5.31422
0.0569	5.23177	5.22395	5.23705
0.057	5.39528	5.26796	5.21318
0.0571	5.46907	5.23994	5.24278
0.0572	5.30309	5.39888	5.25166
0.0573	5.30049	5.42165	5.45866
0.0574	5.19963	5.37563	5.37968
0.0575	5.30708	5.38854	5.32838
0.0576	5.41005	5.31578	5.36702
0.0577	5.3242	5.29833	5.2968
0.0578	5.38612	5.29466	5.32604
0.0579	5.2061	5.28874	5.23839
0.058	5.31313	5.24898	5.31596
0.0581	5.28587	5.2444	5.41957
0.0582	5.42866	5.30733	5.45525
0.0583	5.31572	5.27858	5.28615
0.0584	5.40886	5.30595	5.28481
0.0585	5.2187	5.32506	5.3615
0.0586	5.21434	5.27519	5.26729
0.0587	5.26375	5.22456	5.30351
0.0588	5.3632	5.2831	5.28252
0.0589	5.45061	5.26323	5.35634
0.059	5.33037	5.31892	5.30534
0.0591	5.33617	5.3376	5.29246
0.0592	5.26939	5.28459	5.19337
0.0593	5.32948	5.36772	5.29411
0.0594	5.33086	5.42046	5.35503
0.0595	5.30995	5.3076	5.40456
0.0596	5.31239	5.27504	5.14922
0.0597	5.41933	5.23735	5.22591
0.0598	5.39296	5.32344	5.35756
0.0599	5.25783	5.38832	5.25468
0.06	5.23238	5.44856	5.19826
0.0601	5.25826	5.24361	5.4059
0.0602	5.33269	5.31902	5.34862
0.0603	5.312	5.32973	5.32109
0.0604	5.46852	5.21873	5.34038
0.0605	5.37239	5.28395	5.35323
0.0606	5.31953	5.22124	5.33394
0.0607	5.38741	5.39827	5.34053
0.0608	5.33479	5.19991	5.3629
0.0609	5.19618	5.21892	5.44658
0.061	5.21385	5.21596	5.25413
0.0611	5.37193	5.32109	5.27443
0.0612	5.27156	5.36351	5.28578
0.0613	5.34773	5.46709	5.27141
0.0614	5.23759	5.22005	5.2383
0.0615	5.37062	5.19188	5.38502
0.0616	5.39803	5.21236	5.30629
0.0617	5.32079	5.37981	5.35551
0.0618	5.34071	5.37483	5.22011
0.0619	5.29952	5.35115	5.33162
0.062	5.34285	5.38881	5.27016
0.0621	5.31267	5.29542	5.21758
0.0622	5.44322	5.37441	5.39748
0.0623	5.27895	5.35536	5.33833
0.0624	5.37703	5.18721	5.27507
0.0625	5.22002	5.27153	5.24281
0.0626	5.40212	5.19267	5.39433
0.0627	5.24281	5.33598	5.33537
0.0628	5.41695	5.15666	5.38756
0.0629	5.37337	5.38353	5.40797
0.063	5.37483	5.32594	5.36967
0.0631	5.28954	5.28621	5.15184
0.0632	5.41881	5.35777	5.40214
0.0633	5.21907	5.32161	5.41957
0.0634	5.45341	5.20784	5.47752
0.0635	5.35524	5.30736	5.35197
0.0636	5.25963	5.41875	5.09703
0.0637	5.34593	5.27605	5.29362
0.0638	5.42	5.41945	5.30534
0.0639	5.54509	5.22304	5.3535
0.064	5.31035	5.35454	5.24641
0.0641	5.33464	5.41371	5.34319
0.0642	5.34865	5.28719	5.24925
0.0643	5.32365	5.27956	5.18263
0.0644	5.44862	5.32674	5.30879
0.0645	5.32063	5.3459	5.27437
0.0646	5.1685	5.33379	5.3933
0.0647	5.22557	5.28102	5.24004
0.0648	5.28313	5.32774	5.29549
0.0649	5.33458	5.26561	5.31074
0.065	5.41991	5.27562	5.22581
0.0651	5.36125	5.1978	5.30672
0.0652	5.44957	5.25011	5.30083
0.0653	5.4398	5.39781	5.28609
0.0654	5.3571	5.45174	5.26717
0.0655	5.42998	5.42964	5.41637
0.0656	5.39659	5.24095	5.3307
0.0657	5.32301	5.39699	5.33614
0.0658	5.22179	5.22762	5.35692
0.0659	5.28536	5.30174	5.28911
0.066	5.38225	5.2014	5.35823
0.0661	5.28694	5.37151	5.31639
0.0662	5.44218	5.41801	5.2516
0.0663	5.37703	5.34911	5.22462
0.0664	5.35857	5.39531	5.28667
0.0665	5.32753	5.28825	5.38078
0.0666	5.21349	5.32567	5.36653
0.0667	5.15144	5.30519	5.34938
0.0668	5.31502	5.36803	5.18455
0.0669	5.34673	5.30431	5.37752
0.067	5.25798	5.38533	5.21095
0.0671	5.43495	5.33659	5.27504
0.0672	5.33461	5.39464	5.31136
0.0673	5.40849	5.38066	5.34056
0.0674	5.38957	5.16591	5.35655
0.0675	5.41087	5.35902	5.46785
0.0676	5.28899	5.31654	5.30415
0.0677	5.34969	5.27916	5.43251
0.0678	5.37874	5.27382	5.31007
0.0679	5.26732	5.36729	5.40047
0.068	5.28117	5.40138	5.25884
0.0681	5.26448	5.13487	5.21492
0.0682	5.27092	5.25682	5.38368
0.0683	5.41722	5.35902	5.39217
0.0684	5.27486	5.26955	5.24449
0.0685	5.42296	5.28944	5.39366
0.0686	5.29622	5.25594	5.28883
0.0687	5.42921	5.37871	5.41286
0.0688	5.50655	5.30925	5.37962
0.0689	5.35588	5.32072	5.30894
0.069	5.46025	5.38933	5.23656
0.0691	5.30669	5.32634	5.3644
0.0692	5.28435	5.27049	5.23644
0.0693	5.47963	5.37309	5.25996
0.0694	5.44612	5.46251	5.34612
0.0695	5.4301	5.36018	5.25209
0.0696	5.3932	5.26994	5.43263
0.0697	5.45805	5.34419	5.30849
0.0698	5.37532	5.34801	5.35817
0.0699	5.4333	5.38963	5.38271
0.07	5.31432	5.36205	5.24452
0.0701	5.45048	5.22914	5.34923
0.0702	5.27843	5.25594	5.38344
0.0703	5.39461	5.32924	5.23619
0.0704	5.33717	5.44423	5.25246
0.0705	5.29826	5.41066	5.23729
0.0706	5.35872	5.30882	5.35573
0.0707	5.31187	5.38939	5.25279
0.0708	5.28868	5.2953	5.24574
0.0709	5.2213	5.26784	5.24928
0.071	5.45082	5.41331	5.26729
0.0711	5.27965	5.39088	5.29582
0.0712	5.39552	5.22447	5.41759
0.0713	5.46666	5.34578	5.54671
0.0714	5.39891	5.34279	5.28938
0.0715	5.39146	5.45106	5.24416
0.0716	5.47276	5.32201	5.39607
0.0717	5.31288	5.37425	5.34911
0.0718	5.37483	5.33583	5.30013
0.0719	5.28996	5.3398	5.38731
0.072	5.31602	5.3278	5.25087
0.0721	5.47954	5.20683	5.31081
0.0722	5.27852	5.20677	5.36192
0.0723	5.34514	5.27095	5.37016
0.0724	5.28316	5.35851	5.32616
0.0725	5.34853	5.22124	5.3394
0.0726	5.20821	5.31853	5.27977
0.0727	5.29643	5.36488	5.26121
0.0728	5.38576	5.29683	5.39922
0.0729	5.30693	5.28426	5.32185
0.073	5.38942	5.38316	5.37913
0.0731	5.44762	5.36528	5.2227
0.0732	5.26558	5.27367	5.35646
0.0733	5.27608	5.2831	5.38103
0.0734	5.37703	5.24242	5.2484
0.0735	5.37047	5.27531	5.41255
0.0736	5.18266	5.37639	5.27983
0.0737	5.29896	5.23454	5.21803
0.0738	5.39967	5.35231	5.18773
0.0739	5.4268	5.31245	5.3347
0.074	5.36214	5.29378	5.31309
0.0741	5.3228	5.51817	5.28047
0.0742	5.31804	5.26189	5.3835
0.0743	5.4546	5.29723	5.38182
0.0744	5.30827	5.28929	5.36339
0.0745	5.43834	5.31407	5.36467
0.0746	5.22096	5.34337	5.31459
0.0747	5.21977	5.29997	5.27058
0.0748	5.30809	5.29448	5.26164
0.0749	5.3777	5.4124	5.38713
0.075	5.45439	5.27898	5.29732
0.0751	5.291	5.15416	5.32796
0.0752	5.29198	5.24989	5.32564
0.0753	5.43849	5.3799	5.24849
0.0754	5.38164	5.27074	5.33043
0.0755	5.37453	5.40038	5.4359
0.0756	5.35735	5.20384	5.40505
0.0757	5.29567	5.35118	5.39684
0.0758	5.32658	5.261	5.36144
0.0759	5.39214	5.42033	5.28764
0.076	5.35988	5.28563	5.16045
0.0761	5.20934	5.47328	5.28923
0.0762	5.40688	5.32481	5.34255
0.0763	5.21312	5.30305	5.42427
0.0764	5.28389	5.41457	5.29958
0.0765	5.27229	5.37297	5.35893
0.0766	5.347	5.24528	5.2011
0.0767	5.37309	5.4167	5.32204
0.0768	5.35027	5.37483	5.22484
0.0769	5.43483	5.21641	5.39912
0.077	5.44063	5.28145	5.27657
0.0771	5.42412	5.31844	5.24467
0.0772	5.36992	5.24751	5.24168
0.0773	5.26595	5.24504	5.38609
0.0774	5.38927	5.43611	5.34444
0.0775	5.35341	5.46263	5.34688
0.0776	5.23372	5.31148	5.4171
0.0777	5.31426	5.27599	5.50865
0.0778	5.34486	5.16744	5.36546
0.0779	5.55074	5.31001	5.36244
0.078	5.49031	5.25713	5.31963
0.0781	5.41579	5.43388	5.32826
0.0782	5.29561	5.41441	5.38265
0.0783	5.37477	5.40343	5.23726
0.0784	5.41948	5.34416	5.53969
0.0785	5.37807	5.25926	5.2513
0.0786	5.3149	5.26958	5.28474
0.0787	5.35179	5.18715	5.2672
0.0788	5.23991	5.33842	5.36983
0.0789	5.35121	5.42476	5.31963
0.079	5.39879	5.43068	5.27962
0.0791	5.39067	5.44078	5.40627
0.0792	5.39311	5.31627	5.30373
0.0793	5.50108	5.34288	5.31276
0.0794	5.26891	5.35893	5.31248
0.0795	5.2224	5.33629	5.2834
0.0796	5.34929	5.24352	5.32716
0.0797	5.45802	5.34007	5.52876
0.0798	5.39784	5.38881	5.49822
0.0799	5.28346	5.33244	5.34041
0.08	5.27184	5.38969	5.24968
0.0801	5.46245	5.30092	5.33839
0.0802	5.57124	5.31316	5.40984
0.0803	5.11391	5.45216	5.37352
0.0804	5.30611	5.34468	5.21852
0.0805	5.39598	5.33543	5.33666
0.0806	5.40077	5.31953	5.36784
0.0807	5.38377	5.28648	5.36937
0.0808	5.30522	5.35136	5.25014
0.0809	5.39214	5.41652	5.28242
0.081	5.36079	5.24452	5.48527
0.0811	5.49937	5.27901	5.24101
0.0812	5.32716	5.26787	5.40706
0.0813	5.32848	5.32039	5.39986
0.0814	5.43095	5.35109	5.32402
0.0815	5.37944	5.2115	5.43504
0.0816	5.4702	5.24486	5.25658
0.0817	5.2159	5.34941	5.25273
0.0818	5.25203	5.36946	5.20439
0.0819	5.40956	5.35146	5.27696
0.082	5.41435	5.28722	5.37309
0.0821	5.42513	5.31712	5.34373
0.0822	5.33211	5.3694	5.24648
0.0823	5.19771	5.24162	5.35231
0.0824	5.28023	5.44362	5.41219
0.0825	5.45708	5.37508	5.35838
0.0826	5.41914	5.41985	5.34966
0.0827	5.35146	5.32594	5.32597
0.0828	5.38966	5.4424	5.3008
0.0829	5.3813	5.34044	5.25966
0.083	5.47502	5.29503	5.39281
0.0831	5.28941	5.29201	5.29259
0.0832	5.40257	5.40947	5.39735
0.0833	5.54613	5.27965	5.23628
0.0834	5.43065	5.3885	5.36021
0.0835	5.43898	5.43452	5.41289
0.0836	5.29411	5.20558	5.22203
0.0837	5.5808	5.44502	5.28105
0.0838	5.37138	5.40645	5.32958
0.0839	5.37489	5.35875	5.31197
0.084	5.37593	5.26698	5.15062
0.0841	5.42952	5.34776	5.3499
0.0842	5.37434	5.28142	5.31166
0.0843	5.42177	5.37819	5.24528
0.0844	5.39522	5.41194	5.26714
0.0845	5.23982	5.33498	5.38338
0.0846	5.35432	5.49806	5.19096
0.0847	5.27705	5.41289	5.46184
0.0848	5.38509	5.33983	5.3661
0.0849	5.3412	5.29408	5.38466
0.085	5.35063	5.32408	5.3018
0.0851	5.46922	5.21129	5.31233
0.0852	5.35564	5.39537	5.3228
0.0853	5.38206	5.30345	5.30611
0.0854	5.37169	5.31313	5.24596
0.0855	5.43028	5.37706	5.37584
0.0856	5.35576	5.43037	5.27937
0.0857	5.47942	5.41136	5.35673
0.0858	5.44987	5.30785	5.28642
0.0859	5.4218	5.32887	5.23851
0.086	5.36235	5.32756	5.36009
0.0861	5.33736	5.30284	5.3589
0.0862	5.3361	5.48012	5.4218
0.0863	5.45717	5.40669	5.31984
0.0864	5.31157	5.37617	5.35582
0.0865	5.39696	5.37157	5.3539
0.0866	5.51659	5.41454	5.37547
0.0867	5.35347	5.29875	5.37437
0.0868	5.36311	5.39162	5.32408
0.0869	5.35069	5.31978	5.41017
0.087	5.31004	5.27602	5.29039
0.0871	5.4839	5.25563	5.32518
0.0872	5.25465	5.28752	5.41042
0.0873	5.34834	5.35445	5.45198
0.0874	5.31914	5.32625	5.32848
0.0875	5.41991	5.29518	5.35628
0.0876	5.39162	5.39751	5.27296
0.0877	5.38216	5.34462	5.43388
0.0878	5.36037	5.37685	5.24611
0.0879	5.34227	5.30208	5.42641
0.088	5.40227	5.26997	5.37419
0.0881	5.32329	5.326	5.33574
0.0882	5.34828	5.31984	5.38087
0.0883	5.39711	5.36543	5.29042
0.0884	5.3087	5.38167	5.34218
0.0885	5.3203	5.3658	5.37712
0.0886	5.33406	5.35735	5.39445
0.0887	5.4044	5.26476	5.35017
0.0888	5.23576	5.25523	5.34856
0.0889	5.44441	5.28963	5.29649
0.089	5.42558	5.35848	5.39
0.0891	5.35988	5.30363	5.27705
0.0892	5.35811	5.45924	5.45686
0.0893	5.34297	5.41307	5.42677
0.0894	5.47606	5.38438	5.2878
0.0895	5.31844	5.46761	5.31136
0.0896	5.24834	5.2953	5.36952
0.0897	5.30092	5.32115	5.19136
0.0898	5.2588	5.42857	5.29073
0.0899	5.35027	5.36317	5.3488
0.09	5.28804	5.274	5.42448
0.0901	5.39555	5.37401	5.32066
0.0902	5.39208	5.30708	5.34199
0.0903	5.31606	5.43217	5.36256
0.0904	5.33769	5.54332	5.33235
0.0905	5.40114	5.30605	5.31865
0.0906	5.43623	5.30843	5.4489
0.0907	5.23518	5.33806	5.44997
0.0908	5.37962	5.44411	5.2831
0.0909	5.35558	5.24193	5.30901
0.091	5.35716	5.37987	5.25685
0.0911	5.41133	5.19194	5.33003
0.0912	5.52522	5.20119	5.36299
0.0913	5.45262	5.26546	5.22185
0.0914	5.40654	5.31013	5.36958
0.0915	5.41676	5.39317	5.36198
0.0916	5.31374	5.42793	5.32082
0.0917	5.53026	5.30711	5.34099
0.0918	5.42561	5.21181	5.30965
0.0919	5.46535	5.35194	5.26668
0.092	5.3766	5.3188	5.28569
0.0921	5.49278	5.34758	5.27162
0.0922	5.32091	5.34502	5.32988
0.0923	5.29506	5.25731	5.3632
0.0924	5.44264	5.31563	5.28059
0.0925	5.43288	5.34645	5.33913
0.0926	5.35606	5.34975	5.25697
0.0927	5.30794	5.3217	5.38539
0.0928	5.35915	5.33293	5.35191
0.0929	5.45482	5.30165	5.30278
0.093	5.41725	5.34712	5.36626
0.0931	5.26891	5.36293	5.3343
0.0932	5.3903	5.35204	5.25945
0.0933	5.3217	5.37688	5.35731
0.0934	5.3232	5.33662	5.19377
0.0935	5.46059	5.22206	5.36824
0.0936	5.38664	5.35011	5.41441
0.0937	5.34526	5.32158	5.42604
0.0938	5.33141	5.31841	5.33742
0.0939	5.44011	5.32079	5.36482
0.094	5.36272	5.42018	5.43633
0.0941	5.43327	5.43315	5.37456
0.0942	5.4865	5.26961	5.38066
0.0943	5.43242	5.45647	5.36555
0.0944	5.35307	5.34566	5.21196
0.0945	5.38557	5.38167	5.38057
0.0946	5.34245	5.38219	5.36555
0.0947	5.41475	5.38741	5.41167
0.0948	5.32784	5.32109	5.42042
0.0949	5.29494	5.3575	5.39864
0.095	5.41789	5.27559	5.38921
0.0951	5.24883	5.32558	5.36708
0.0952	5.25224	5.29713	5.26744
0.0953	5.41951	5.24858	5.39751
0.0954	5.44133	5.44646	5.32481
0.0955	5.3322	5.30104	5.22881
0.0956	5.33641	5.37804	5.34706
0.0957	5.30452	5.31337	5.38579
0.0958	5.33409	5.40602	5.45769
0.0959	5.37352	5.38322	5.40663
0.096	5.33162	5.33629	5.3918
0.0961	5.32094	5.24449	5.22884
0.0962	5.30641	5.29414	5.30019
0.0963	5.40855	5.31016	5.45973
0.0964	5.47826	5.3091	5.34914
0.0965	5.39043	5.36146	5.43767
0.0966	5.39409	5.3839	5.41472
0.0967	5.35921	5.42317	5.26537
0.0968	5.31081	5.32466	5.37798
0.0969	5.37163	5.30067	5.16606
0.097	5.42735	5.37245	5.38594
0.0971	5.35518	5.49467	5.37737
0.0972	5.36134	5.36662	5.30598
0.0973	5.4012	5.28831	5.36504
0.0974	5.17055	5.33211	5.3481
0.0975	5.33021	5.39647	5.40721
0.0976	5.46025	5.30837	5.30363
0.0977	5.52547	5.30614	5.29796
0.0978	5.36165	5.38341	5.32378
0.0979	5.38313	5.35918	5.36629
0.098	5.3022	5.32814	5.43596
0.0981	5.45458	5.34599	5.37114
0.0982	5.2693	5.34499	5.2668
0.0983	5.37642	5.24751	5.30974
0.0984	5.3658	5.48775	5.36671
0.0985	5.32088	5.33772	5.46251
0.0986	5.23781	5.33223	5.33849
0.0987	5.37093	5.47411	5.31148
0.0988	5.4189	5.43181	5.30833
0.0989	5.38152	5.45348	5.29527
0.099	5.49968	5.33827	5.34074
0.0991	5.41405	5.48552	5.43132
0.0992	5.31609	5.57045	5.30937
0.0993	5.43339	5.34969	5.41795
0.0994	5.40358	5.27013	5.2711
0.0995	5.34538	5.22173	5.29533
0.0996	5.30379	5.31065	5.28566
0.0997	5.3893	5.28303	5.37727
0.0998	5.31325	5.28651	5.36809
0.0999	5.45369	5.4033	5.188
0.1	5.39152	5.25041	5.3495
1
0.0001	5.98777	6.02378	5.91886
0.0002	6.00354	5.97388	6.02976
0.0003	5.98377	6.01227	5.99894
0.0004	5.97043	6.04538	6.04483
0.0005	5.90992	6.0174	5.97138
0.0006	6.02396	6.01255	6.01511
0.0007	5.97605	6.0774	5.9263
0.0008	6.02314	5.99228	5.98288
0.0009	6.02118	5.96708	5.95374
0.001	5.95896	5.94407	5.9635
0.0011	6.05753	6.0521	6.00418
0.0012	6.00614	5.90186	5.95945
0.0013	6.00168	5.99558	6.01539
0.0014	6.01496	6.02008	5.99143
0.0015	6.01841	5.96833	5.97104
0.0016	5.98917	5.94571	5.94831
0.0017	6.00412	5.99128	5.98056
0.0018	6.04935	6.00989	5.98157
0.0019	5.96747	5.96915	5.96884
0.002	6.01297	5.97492	6.01941
0.0021	6.00403	5.96335	5.99341
0.0022	6.0304	6.07935	6.00693
0.0023	5.96558	5.95209	5.98716
0.0024	6.0167	5.96503	5.98044
0.0025	5.96515	6.05481	5.9838
0.0026	5.96732	5.9155	5.9795
0.0027	5.94425	6.02408	6.00333
0.0028	6.00696	5.97226	5.97821
0.0029	5.97632	6.00125	6.02253
0.003	5.96842	6.00748	6.00596
0.0031	6.02341	6.04416	5.9672
0.0032	5.98392	6.07987	6.05014
0.0033	5.98392	6.01776	6.0401
0.0034	5.94828	5.94672	6.00867
0.0035	5.98752	6.03913	6.03562
0.0036	5.98908	6.06516	6.01026
0.0037	5.94773	5.97986	6.03
0.0038	5.94986	6.02396	6.05085
0.0039	6.05146	6.04212	5.98679
0.004	5.95279	6.05039	5.98432
0.0041	5.96024	6.01499	5.93717
0.0042	5.97315	5.95392	6.00479
0.0043	5.98416	6.01276	6.00507
0.0044	5.97364	6.05521	6.03894
0.0045	5.92075	5.98578	5.90348
0.0046	5.94809	5.94382	5.91074
0.0047	5.98868	5.94483	5.97013
0.0048	5.99301	5.96076	6.01441
0.0049	6.04657	6.01917	6.01606
0.005	5.99915	6.02964	6.02533
0.0051	5.97208	5.97055	5.98642
0.0052	5.96997	5.93564	5.97828
0.0053	6.00473	5.90839	6.00983
0.0054	5.99408	6.05237	5.98014
0.0055	5.96997	6.05286	6.02109
0.0056	5.96445	5.96241	5.99262
0.0057	6.02033	6.00464	6.01737
0.0058	5.98566	6.05713	6.0709
0.0059	5.999	6.03357	6.05277
0.006	5.97644	6.0546	6.05082
0.0061	5.90573	6.01563	5.92597
0.0062	6.00263	6.02655	6.01334
0.0063	6.08631	5.99277	6.01007
0.0064	6.01227	6.00467	5.89182
0.0065	6.02338	6.00861	5.97272
0.0066	5.97599	5.99744	6.07904
0.0067	6.00583	6.04032	5.94013
0.0068	5.94132	5.97354	6.01456
0.0069	6.01325	5.99347	5.98426
0.007	5.94968	5.97123	5.96647
0.0071	5.97974	5.98301	6.02231
0.0072	5.96784	5.96903	5.94565
0.0073	6.03272	5.93107	6.0271
0.0074	6.0438	6.03721	6.04352
0.0075	6.03925	6.01783	5.956
0.0076	5.9495	5.99445	5.97721
0.0077	5.97388	5.94211	5.93232
0.0078	5.95221	6.00687	5.98487
0.0079	5.98249	5.99677	6.04471
0.008	5.93619	5.97825	5.98017
0.0081	6.01322	5.93076	5.92533
0.0082	6.06134	6.04496	6.0976
0.0083	6.06	6.02219	6.04017
0.0084	5.94565	6.02369	6.05954
0.0085	6.03974	6.02103	6.04502
0.0086	6.02927	6.03254	5.89246
0.0087	5.94062	5.95816	5.95444
0.0088	5.91626	5.95905	6.05207
0.0089	5.96976	6.00348	5.95792
0.009	5.905	5.98917	6.02161
0.0091	6.00455	5.95514	6.00751
0.0092	6.03046	5.98398	6.0167
0.0093	5.9672	6.03247	5.93317
0.0094	5.99762	5.97437	6.00638
0.0095	5.99189	6.0055	6.04367
0.0096	5.95462	5.97272	5.92118
0.0097	5.91944	6.00943	5.99195
0.0098	5.98392	5.97629	5.97022
0.0099	5.96589	5.98163	5.99665
0.01	5.99323	6.01007	6.14014
0.0101	5.97379	6.00431	6.04456
0.0102	6.02042	5.98307	5.98752
0.0103	5.94526	5.96985	5.9896
0.0104	5.93036	6.01148	6.04181
0.0105	6.00953	6.00205	5.96808
0.0106	5.89365	5.94168	6.02152
0.0107	5.99512	5.96729	6.01304
0.0108	6.0141	5.99979	5.97409
0.0109	5.9704	5.99274	5.97513
0.011	5.86182	6.02668	5.9368
0.0111	5.98169	5.9972	6.00586
0.0112	5.94904	5.95395	5.96872
0.0113	6.04706	5.95987	6.08844
0.0114	6.00394	5.98743	5.99765
0.0115	5.98487	6.05048	5.91898
0.0116	5.96262	5.99738	6.01307
0.0117	5.99357	6.02509	5.87983
0.0118	5.9303	5.9953	5.96744
0.0119	5.96765	5.98618	5.94428
0.012	5.9805	6.03406	5.96973
0.0121	5.9617	5.98368	5.93375
0.0122	5.92405	5.96534	5.98569
0.0123	5.8776	5.95585	5.99741
0.0124	6.00422	5.96576	5.96256
0.0125	5.92521	5.91617	5.94999
0.0126	6.00354	6.03208	5.96683
0.0127	6.04163	6.03357	5.93479
0.0128	5.9441	5.92487	6.03327
0.0129	6.01871	5.9614	5.9838
0.013	5.95304	6.0242	5.96454
0.0131	6.00168	6.02658	5.96869
0.0132	6.0235	6.05826	5.96277
0.0133	6.04254	6.02189	5.97324
0.0134	5.97513	6.02216	5.94437
0.0135	5.95328	6.05985	5.99775
0.0136	5.9719	6.02927	5.9393
0.0137	5.94797	6.00141	5.96283
0.0138	6.02454	5.97327	5.95871
0.0139	6.0174	5.95954	5.94486
0.014	5.99878	5.98801	5.91611
0.0141	5.99665	6.03336	6.05619
0.0142	5.96952	5.97678	5.92105
0.0143	5.98017	6.0098	6.02527
0.0144	5.95456	6.00122	5.93891
0.0145	6.00293	5.98233	6.01187
0.0146	5.97477	5.98999	6.02494
0.0147	6.02329	5.99173	5.96079
0.0148	5.99387	6.02979	5.91172
0.0149	6.01014	6.0261	5.97113
0.015	6.01691	6.02011	5.95426
0.0151	5.98365	6.03174	5.94818
0.0152	6.094	5.98136	6.00815
0.0153	5.98856	5.96634	5.94577
0.0154	5.97596	6.0456	5.91663
0.0155	5.92502	5.92487	5.97519
0.0156	5.87494	5.96045	5.96579
0.0157	5.96198	6.01285	5.99158
0.0158	6.00186	6.08222	5.90427
0.0159	6.00699	5.97693	5.96131
0.016	5.98972	5.94996	6.02588
0.0161	5.95133	5.9635	6.03141
0.0162	5.97721	5.98792	5.96442
0.0163	5.97687	5.9455	5.95749
0.0164	5.95237	5.97367	6.01514
0.0165	5.96561	5.99805	6.00977
0.0166	6.00605	5.95169	5.88285
0.0167	5.96604	6.03568	6.02301
0.0168	5.97058	6.03373	5.99918
0.0169	5.94248	6.0539	6.06565
0.017	6.00058	6.02182	5.98432
0.0171	5.87885	5.95939	5.99073
0.0172	6.03501	6.01972	6.03632
0.0173	5.90992	5.97486	5.98206
0.0174	5.97071	5.90967	5.9646
0.0175	6.02893	6.08765	5.90107
0.0176	5.99485	5.99475	5.90439
0.0177	6.01624	6.01157	5.97556
0.0178	5.9682	5.92569	5.91568
0.0179	5.96958	5.98075	5.95948
0.018	5.95475	5.95868	5.92426
0.0181	5.91773	6.03574	5.95969
0.0182	6.01758	5.97397	5.93067
0.0183	5.95386	5.9607	5.9711
0.0184	5.98493	5.89829	5.99036
0.0185	5.97217	6.00888	5.90454
0.0186	6.01856	5.97043	5.87064
0.0187	5.92197	5.99024	5.95902
0.0188	6.02228	5.94025	5.98197
0.0189	5.96503	6.01102	5.8996
0.019	6.01447	6.00705	5.98517
0.0191	5.99448	5.98932	5.95264
0.0192	6.03629	5.95932	5.99186
0.0193	5.96982	6.00669	5.95356
0.0194	5.97525	5.94944	5.92798
0.0195	5.94114	6.01737	5.91648
0.0196	6.00446	5.94907	5.9188
0.0197	5.95258	5.97748	5.9827
0.0198	5.98682	6.0022	5.9477
0.0199	5.94849	5.9581	6.02424
0.02	5.96268	5.98651	5.95047
0.0201	6.03202	6.00324	5.88187
0.0202	5.9715	6.04612	5.92575
0.0203	5.92228	5.98395	6.04862
0.0204	5.95646	5.9094	6.0138
0.0205	5.97297	6.04254	5.91349
0.0206	5.90741	5.96424	5.96888
0.0207	5.9899	5.97266	6.012
0.0208	6.04279	5.98044	6.03919
0.0209	5.98371	5.96552	5.98963
0.021	5.94693	5.94928	5.92408
0.0211	5.96048	5.89298	5.93973
0.0212	5.91285	5.97409	5.93555
0.0213	6.0134	5.94843	5.98703
0.0214	5.98081	6.04929	5.91812
0.0215	5.95627	5.96039	6.01816
0.0216	5.99384	5.99726	5.89637
0.0217	5.95939	5.93705	5.96586
0.0218	5.91791	6.06073	5.96778
0.0219	5.91767	6.00974	5.96903
0.022	5.99015	6.00138	5.9578
0.0221	5.90577	6.00003	5.90503
0.0222	5.96863	6.00846	5.92182
0.0223	5.96183	5.99244	5.99805
0.0224	5.94077	5.96543	5.8758
0.0225	5.91779	5.94709	5.92484
0.0226	5.93573	5.9953	5.94803
0.0227	5.97113	5.95197	5.83594
0.0228	5.92844	6.01151	5.89908
0.0229	5.93918	5.95118	5.89991
0.023	6.01099	5.99109	5.89096
0.0231	5.89328	5.97312	5.96619
0.0232	5.95356	6.02091	5.92566
0.0233	5.88617	6.03971	5.92994
0.0234	5.93387	6.0004	5.91581
0.0235	5.95453	5.95475	5.8964
0.0236	5.94495	5.9795	5.948
0.0237	5.9455	5.96399	5.96323
0.0238	5.9802	5.991	5.95575
0.0239	5.95978	5.97068	5.98087
0.024	5.92481	5.9234	5.92984
0.0241	5.93586	6.03604	5.90839
0.0242	5.96842	6.02393	5.9169
0.0243	5.95185	5.99711	5.92343
0.0244	5.90833	5.99085	5.96888
0.0245	5.99314	5.99118	5.88804
0.0246	5.9433	5.90799	5.88492
0.0247	5.94794	5.98792	5.96112
0.0248	5.9394	6.03464	5.89222
0.0249	5.8407	6.00833	5.9213
0.025	5.97867	5.91266	5.91208
0.0251	5.98236	6.01337	5.84833
0.0252	6.01142	6.01355	5.89112
0.0253	5.93033	6.04242	6.00833
0.0254	5.90284	5.99277	5.85962
0.0255	5.97211	5.95502	5.92124
0.0256	5.94935	5.91156	5.9285
0.0257	5.9805	5.9448	5.92624
0.0258	5.90744	6.02466	5.93561
0.0259	5.96857	6.06675	5.93061
0.026	5.95819	5.96222	5.90024
0.0261	5.94919	5.96973	5.97025
0.0262	5.93515	5.95505	5.91968
0.0263	5.94007	5.93436	5.90644
0.0264	5.91892	5.98667	5.9303
0.0265	5.94858	6.00339	5.86914
0.0266	6.01401	5.91419	5.88514
0.0267	5.96436	5.96811	5.94818
0.0268	5.99686	5.99939	5.92569
0.0269	5.96894	5.94724	5.92072
0.027	5.88898	5.99204	5.94974
0.0271	6.01774	5.96628	5.95435
0.0272	5.94165	5.99436	5.90723
0.0273	5.98651	5.95664	5.90458
0.0274	5.97065	6.01587	5.92859
0.0275	6.02509	5.9625	5.93827
0.0276	5.88568	5.97232	5.86692
0.0277	5.98218	5.97043	5.87012
0.0278	5.93659	5.99448	5.86332
0.0279	5.95813	6.03641	5.91034
0.028	5.97617	5.95005	5.93982
0.0281	5.99186	6.02387	5.95929
0.0282	5.89243	5.90094	5.90775
0.0283	5.90607	5.95627	5.91159
0.0284	5.92643	5.95026	5.89429
0.0285	5.96472	5.87064	5.91126
0.0286	5.97086	5.97892	5.88071
0.0287	5.89856	6.00568	5.93268
0.0288	5.93207	6.00559	5.97202
0.0289	5.93723	5.97272	5.89539
0.029	5.91434	5.99353	5.9527
0.0291	5.90702	6.0311	5.89618
0.0292	5.939	6.03351	5.87754
0.0293	5.97666	6.03376	5.89081
0.0294	6.0521	5.98438	5.91944
0.0295	6.00797	5.98328	5.92026
0.0296	6.0123	6.01981	6.03553
0.0297	5.97669	6.03107	5.88697
0.0298	5.9679	5.93219	5.84
0.0299	5.86728	5.92221	5.93347
0.03	5.87445	5.96463	5.88297
0.0301	5.90995	5.95118	5.8295
0.0302	5.96088	5.90241	5.9639
0.0303	5.92539	5.96024	5.88392
0.0304	5.9054	5.93778	5.93439
0.0305	5.97712	5.97464	5.85355
0.0306	5.94245	5.96247	5.93509
0.0307	5.917	5.97947	6.01285
0.0308	5.88507	5.98252	5.92658
0.0309	5.9141	5.91663	5.8971
0.031	5.95002	6.00464	5.85956
0.0311	5.96302	5.96393	5.90039
0.0312	5.88636	5.91071	5.89417
0.0313	5.81635	5.97104	5.89081
0.0314	5.9459	5.98783	5.85889
0.0315	5.85941	5.96015	5.92694
0.0316	5.97107	5.97773	5.94095
0.0317	5.92719	6.02399	5.94944
0.0318	5.91959	5.92328	5.8783
0.0319	5.88343	5.9552	5.9787
0.032	5.98676	5.86158	5.87964
0.0321	5.91172	5.91886	5.89264
0.0322	5.94693	6.04996	5.92399
0.0323	5.89032	5.89814	5.90305
0.0324	5.97647	5.91834	5.90592
0.0325	5.96805	6.00974	5.90598
0.0326	5.93363	5.94013	5.8588
0.0327	5.89924	5.94669	5.9188
0.0328	5.96119	5.94794	5.93689
0.0329	5.94574	6.00373	5.96232
0.033	5.83683	5.91571	5.96866
0.0331	5.91095	5.96625	5.85648
0.0332	5.88059	5.94605	5.98984
0.0333	5.8321	5.9784	5.86478
0.0334	5.93583	5.86264	5.91983
0.0335	5.87601	5.8989	5.91517
0.0336	5.88044	5.96668	5.93842
0.0337	5.93222	5.83796	5.9527
0.0338	5.92933	5.9859	5.91666
0.0339	5.90693	5.97846	5.92188
0.034	5.91657	5.96988	5.96775
0.0341	5.88794	5.98847	6.02436
0.0342	5.92694	5.95267	5.85151
0.0343	5.86954	5.97415	5.86447
0.0344	5.87705	5.87168	5.9473
0.0345	5.91248	5.89606	5.94748
0.0346	5.9364	5.95859	5.94471
0.0347	5.94315	5.98877	5.95075
0.0348	5.93177	5.92417	5.90888
0.0349	5.92179	6.03012	5.89701
0.035	5.98105	5.99619	5.95279
0.0351	5.93869	5.95496	5.96714
0.0352	5.99994	5.95697	5.88977
0.0353	5.99613	5.98206	5.88471
0.0354	5.92557	5.9263	5.96082
0.0355	5.83194	5.94794	5.89096
0.0356	5.90946	5.92508	5.97058
0.0357	5.90482	5.98795	5.98545
0.0358	5.91394	5.98435	5.88501
0.0359	5.92462	5.87549	5.88175
0.036	5.94776	5.9473	5.89862
0.0361	5.92508	5.95243	5.93674
0.0362	5.86615	5.96323	5.86438
0.0363	5.89481	5.91794	5.85907
0.0364	5.88993	5.87857	5.96979
0.0365	5.90073	5.98221	5.90912
0.0366	5.85535	5.87589	5.88996
0.0367	5.99173	5.97513	5.83347
0.0368	5.8898	5.85712	5.90363
0.0369	5.86451	5.96451	5.85679
0.037	5.81253	6.00486	5.92884
0.0371	5.84177	5.93222	5.95096
0.0372	5.93872	5.94287	5.91129
0.0373	5.92124	5.95585	5.85627
0.0374	5.86011	5.90854	5.91834
0.0375	5.83747	5.93711	5.89393
0.0376	5.94165	5.91336	5.86628
0.0377	5.89161	5.94346	5.9181
0.0378	5.87186	6.00425	5.83924
0.0379	5.90732	5.93082	5.96665
0.038	5.84384	5.95362	5.92609
0.0381	5.85376	5.93427	5.89481
0.0382	5.96979	5.85199	5.87217
0.0383	5.86396	5.97797	5.90528
0.0384	5.88581	6.01477	5.83057
0.0385	5.88974	5.92606	5.8888
0.0386	5.8656	5.91001	5.87833
0.0387	5.80231	5.94757	5.89002
0.0388	5.84793	5.97119	5.81681
0.0389	5.92362	5.93341	5.9028
0.039	5.96607	5.88617	5.91751
0.0391	5.91159	5.95511	5.94138
0.0392	5.93268	5.95273	5.92838
0.0393	5.91544	5.92951	5.84427
0.0394	5.95514	5.96515	5.887
0.0395	5.93216	5.96854	5.91632
0.0396	5.90683	5.86795	5.91205
0.0397	5.90186	5.92933	5.94883
0.0398	5.94748	5.94782	5.94178
0.0399	5.91159	5.9589	5.94327
0.04	5.86432	5.98478	5.89814
0.0401	5.90735	5.89164	5.89542
0.0402	5.878	5.85453	5.91318
0.0403	5.91843	5.92755	5.84488
0.0404	5.92453	5.83393	5.87925
0.0405	5.879	5.87836	5.90632
0.0406	5.91169	5.89246	5.80683
0.0407	5.90036	5.94703	5.87058
0.0408	5.86942	5.88614	5.84305
0.0409	5.87964	5.87122	5.86451
0.041	5.86469	5.88309	5.91205
0.0411	5.86795	5.95585	5.85712
0.0412	5.92051	5.95237	5.88871
0.0413	5.94684	5.84989	5.84574
0.0414	5.86725	6.02247	5.84919
0.0415	5.92447	5.9682	5.89176
0.0416	5.83051	5.88218	5.90137
0.0417	5.81711	5.9	5.9
0.0418	5.95185	5.97565	5.84745
0.0419	5.89438	5.91242	5.87564
0.042	5.90174	5.9119	5.8602
0.0421	5.92566	5.91043	5.92371
0.0422	5.86951	5.87384	5.90165
0.0423	5.93119	5.85828	5.87857
0.0424	5.87742	5.95615	5.83847
0.0425	5.98374	5.94538	5.75974
0.0426	5.87928	5.91169	5.85044
0.0427	5.86945	5.95139	5.90686
0.0428	5.87162	5.91495	5.83533
0.0429	5.95591	5.91211	5.91535
0.043	5.84784	5.92221	5.88416
0.0431	5.90329	5.86863	5.81528
0.0432	5.89051	5.87262	5.87671
0.0433	5.9516	5.90238	5.87891
0.0434	5.95853	5.93225	5.88181
0.0435	5.89344	5.88709	5.87296
0.0436	5.8552	5.96692	5.89234
0.0437	5.88636	5.85672	5.91196
0.0438	5.91544	5.91251	5.85526
0.0439	5.9701	5.96293	5.92359
0.044	5.92343	5.91223	5.97956
0.0441	5.8862	5.9545	5.8776
0.0442	5.93604	5.94983	5.83567
0.0443	5.83258	5.9083	5.84143
0.0444	5.81501	5.92267	5.87009
0.0445	5.88846	5.86332	5.87308
0.0446	5.84113	5.8523	5.88358
0.0447	5.89887	5.91501	5.83911
0.0448	5.89487	5.9636	5.94156
0.0449	5.82157	5.90418	5.89682
0.045	5.89856	5.85779	5.77915
0.0451	5.81354	5.8924	5.84931
0.0452	5.95951	5.92023	5.93888
0.0453	5.98612	5.91501	5.83567
0.0454	5.87833	5.90604	5.83014
0.0455	5.78876	5.93869	5.84482
0.0456	5.86911	5.88349	5.87723
0.0457	5.90268	5.87912	5.7851
0.0458	5.86438	5.86286	5.9105
0.0459	5.89017	5.92786	5.8689
0.046	5.91672	5.88272	5.90256
0.0461	5.94309	5.94629	5.95179
0.0462	5.91385	5.83869	5.83472
0.0463	5.85874	5.91883	5.89606
0.0464	5.82489	5.92527	5.86505
0.0465	5.88367	5.89139	5.91623
0.0466	5.86005	5.94434	5.88272
0.0467	5.81891	5.84125	5.86081
0.0468	5.94809	5.89222	5.90049
0.0469	5.90689	5.89347	5.87561
0.047	5.83045	5.84519	5.87223
0.0471	5.91162	5.94074	5.82825
0.0472	5.86811	5.85801	5.88685
0.0473	5.98966	5.9318	5.80933
0.0474	5.94931	5.88459	5.85269
0.0475	5.8574	5.94242	5.85923
0.0476	5.9054	5.89963	5.84293
0.0477	5.86951	5.89768	5.883
0.0478	5.9635	5.99714	5.84226
0.0479	5.892	5.85392	5.89975
0.048	5.90311	6.0008	5.85788
0.0481	5.92389	5.91596	5.91465
0.0482	5.84955	5.9057	5.84
0.0483	5.9151	5.96009	5.83451
0.0484	5.87458	5.89621	5.90689
0.0485	5.95139	5.94654	5.79169
0.0486	5.94526	5.87546	5.85459
0.0487	5.91376	5.85102	5.81974
0.0488	5.89389	5.91953	5.79059
0.0489	5.83799	5.85575	5.90674
0.049	5.86792	5.86933	5.85822
0.0491	5.86289	5.82761	5.84504
0.0492	5.95597	5.92356	5.83295
0.0493	5.94202	5.90702	5.83475
0.0494	5.84153	5.93201	5.8256
0.0495	5.86069	5.84211	5.8704
0.0496	5.98273	5.9133	5.93656
0.0497	5.84177	5.93229	5.91315
0.0498	5.9166	5.85355	5.83808
0.0499	5.89014	5.90586	5.92557
0.05	5.85831	5.99796	5.8606
0.0501	5.85566	5.87317	5.90113
0.0502	5.93036	5.85495	5.87674
0.0503	5.95377	5.86875	5.90107
0.0504	5.88504	5.88852	5.79139
0.0505	5.88004	5.89331	5.89945
0.0506	5.91843	5.92719	5.7746
0.0507	5.85682	5.94642	5.87879
0.0508	5.90259	5.87564	5.81025
0.0509	5.92417	5.96238	5.82752
0.051	5.89274	5.91556	5.80222
0.0511	5.83774	5.88333	5.89438
0.0512	5.79847	5.87104	5.88681
0.0513	5.88309	5.93076	5.80631
0.0514	5.84314	5.8989	5.86475
0.0515	5.85257	5.89811	5.91477
0.0516	5.89142	5.85334	5.83637
0.0517	5.89869	5.8729	5.86988
0.0518	5.90137	5.89719	5.80875
0.0519	5.86231	5.9057	5.83112
0.052	5.88468	5.88422	5.9437
0.0521	5.84561	5.87973	5.84269
0.0522	5.79932	5.92655	5.86084
0.0523	5.9238	5.91019	5.81711
0.0524	5.83374	5.91114	5.84305
0.0525	5.89267	5.83878	5.89563
0.0526	5.94361	5.9206	5.82831
0.0527	5.87555	5.92063	5.83472
0.0528	5.80072	5.90464	5.87076
0.0529	5.80387	5.94568	5.91391
0.053	5.96335	5.90146	5.88758
0.0531	5.89801	5.88495	5.8476
0.0532	5.86881	5.85117	5.81241
0.0533	5.85688	5.88465	5.91028
0.0534	5.81803	5.90259	5.80173
0.0535	5.85178	5.92102	5.86057
0.0536	5.90195	5.8862	5.86969
0.0537	5.89594	6.01276	5.91297
0.0538	5.87894	5.86799	5.91977
0.0539	5.93311	5.92572	5.85013
0.054	5.88736	5.88218	5.87793
0.0541	5.81934	5.87909	5.8028
0.0542	5.8505	5.94092	5.85019
0.0543	5.86823	5.89682	5.8758
0.0544	5.84561	5.94764	5.88221
0.0545	5.91715	5.9134	5.80213
0.0546	5.86948	5.88599	5.90222
0.0547	5.95432	5.88758	5.82352
0.0548	5.7945	5.86811	5.84186
0.0549	5.9325	5.89124	5.82117
0.055	5.87818	5.90122	5.86704
0.0551	5.87946	5.87494	5.87018
0.0552	5.85758	5.85666	5.8761
0.0553	5.88535	5.89032	5.87644
0.0554	5.88547	5.88742	5.86975
0.0555	5.82489	5.84552	5.86402
0.0556	5.82367	5.85303	5.89457
0.0557	5.90189	5.89856	5.86503
0.0558	5.88953	5.84079	5.8512
0.0559	5.8996	5.86908	5.87467
0.056	5.91315	5.86533	5.84446
0.0561	5.84696	5.92533	5.88187
0.0562	5.82904	5.91092	5.83026
0.0563	5.89862	5.93131	5.77619
0.0564	5.84531	5.86515	5.82074
0.0565	5.79728	5.86634	5.75409
0.0566	5.93692	5.87473	5.85718
0.0567	5.87711	5.94935	5.80832
0.0568	5.82718	5.8949	5.87192
0.0569	5.79541	5.84546	5.76667
0.057	5.88413	5.9021	5.85517
0.0571	5.83445	5.86823	5.82163
0.0572	5.78647	5.92466	5.87686
0.0573	5.8852	5.94587	5.68439
0.0574	5.86426	5.9101	5.88437
0.0575	5.91129	5.88245	5.88651
0.0576	5.91919	5.89557	5.79029
0.0577	5.88562	5.90024	5.85025
0.0578	5.78531	5.83176	5.93186
0.0579	5.87549	5.83933	5.80872
0.058	5.90012	5.84824	5.84275
0.0581	5.82309	5.82846	5.76502
0.0582	5.89554	5.88709	5.82444
0.0583	5.87079	5.87461	5.83487
0.0584	5.81604	5.95633	5.83591
0.0585	5.79364	5.88114	5.81464
0.0586	5.87922	5.80298	5.84485
0.0587	5.92188	5.92426	5.88782
0.0588	5.82624	5.9664	5.84534
0.0589	5.86185	5.91193	5.80649
0.059	5.87107	5.83631	5.84793
0.0591	5.86002	5.87748	5.92676
0.0592	5.8049	5.88636	5.88092
0.0593	5.95566	5.90137	5.90683
0.0594	5.92667	5.83918	5.81113
0.0595	5.92356	5.87033	5.80079
0.0596	5.8581	5.88288	5.79245
0.0597	5.92737	5.90995	5.91016
0.0598	5.83643	5.88446	5.87711
0.0599	5.92911	5.88047	5.85553
0.06	5.82291	5.82972	5.8057
0.0601	5.84952	5.82926	5.79612
0.0602	5.87049	5.85599	5.84204
0.0603	5.88764	5.8978	5.89554
0.0604	5.90839	5.81073	5.83216
0.0605	5.89463	5.79969	5.8093
0.0606	5.89133	5.80832	5.85477
0.0607	5.85416	5.80295	5.81052
0.0608	5.85578	5.91706	5.80362
0.0609	5.89194	5.91718	5.82706
0.061	5.8516	5.82804	5.84647
0.0611	5.82938	5.87442	5.84546
0.0612	5.89988	5.86289	5.76157
0.0613	5.84217	5.90683	5.84952
0.0614	5.80826	5.85212	5.89075
0.0615	5.89667	5.85419	5.85044
0.0616	5.83347	5.90869	5.82468
0.0617	5.87415	5.88501	5.85392
0.0618	5.9036	5.96915	5.82364
0.0619	5.89414	5.83368	5.78891
0.062	5.80344	5.82883	5.82312
0.0621	5.87519	5.82593	5.80368
0.0622	5.90143	5.83921	5.84015
0.0623	5.78373	5.92798	5.84949
0.0624	5.90149	5.93863	5.88556
0.0625	5.85926	5.83802	5.72934
0.0626	5.8454	5.9444	5.74106
0.0627	5.86371	5.96674	5.7996
0.0628	5.84662	5.86786	5.82029
0.0629	5.83469	5.91578	5.86899
0.063	5.8241	5.90409	5.81797
0.0631	5.85251	5.84278	5.862
0.0632	5.85007	5.89646	5.8176
0.0633	5.88544	5.87677	5.88254
0.0634	5.90632	5.89511	5.82477
0.0635	5.85492	5.81015	5.85733
0.0636	5.87458	5.82279	5.84311
0.0637	5.8971	5.84464	5.78321
0.0638	5.83777	5.86661	5.87677
0.0639	5.86588	5.89411	5.78458
0.064	5.85303	5.87854	5.84507
0.0641	5.90848	5.80716	5.84827
0.0642	5.87674	5.89328	5.89872
0.0643	5.8357	5.90412	5.88269
0.0644	5.86679	5.86725	5.88202
0.0645	5.87125	5.78711	5.77405
0.0646	5.85462	5.81476	5.8136
0.0647	5.8447	5.90161	5.90143
0.0648	5.78864	5.94925	5.88373
0.0649	5.80524	5.92939	5.85004
0.065	5.85025	5.92597	5.83738
0.0651	5.86194	5.87326	5.77811
0.0652	5.85608	5.85529	5.85584
0.0653	5.91904	5.88394	5.81455
0.0654	5.7706	5.87824	5.87571
0.0655	5.87903	5.90632	5.86768
0.0656	5.81873	5.87308	5.8487
0.0657	5.81318	5.91593	5.89756
0.0658	5.84891	5.91593	5.86405
0.0659	5.81961	5.88565	5.72345
0.066	5.85669	5.8703	5.84955
0.0661	5.88581	5.91904	5.78125
0.0662	5.90778	5.8898	5.81107
0.0663	5.91553	5.92554	5.82941
0.0664	5.86325	5.8544	5.90595
0.0665	5.82871	5.87632	5.80735
0.0666	5.84427	5.89621	5.84839
0.0667	5.86771	5.87186	5.76853
0.0668	5.86731	5.79547	5.7884
0.0669	5.87384	5.9076	5.81806
0.067	5.89502	5.88736	5.75025
0.0671	5.89197	5.86896	5.76541
0.0672	5.91346	5.978	5.81354
0.0673	5.83612	5.83789	5.77713
0.0674	5.89811	5.7901	5.77088
0.0675	5.83448	5.90906	5.86197
0.0676	5.81681	5.87223	5.80649
0.0677	5.8075	5.89481	5.84607
0.0678	5.87223	5.90525	5.79664
0.0679	5.89777	5.87656	5.82657
0.068	5.83667	5.80164	5.89368
0.0681	5.92667	5.89133	5.73908
0.0682	5.87101	5.86774	5.86338
0.0683	5.82672	5.83972	5.87091
0.0684	5.86734	5.87525	5.74521
0.0685	5.83414	5.86329	5.76395
0.0686	5.86176	5.91669	5.79999
0.0687	5.81519	5.85837	5.82721
0.0688	5.87934	5.8711	5.8205
0.0689	5.89039	5.91547	5.77277
0.069	5.89417	5.87381	5.83081
0.0691	5.7685	5.8302	5.84119
0.0692	5.83374	5.85712	5.74204
0.0693	5.8758	5.85581	5.8523
0.0694	5.909	5.86197	5.85154
0.0695	5.91477	5.88462	5.87378
0.0696	5.9216	5.83982	5.84382
0.0697	5.85404	5.88477	5.92343
0.0698	5.83655	5.89942	5.84366
0.0699	5.76505	5.78367	5.77033
0.07	5.88385	5.88517	5.85468
0.0701	5.84705	5.85254	5.85184
0.0702	5.83683	5.92969	5.78635
0.0703	5.90424	5.89124	5.82718
0.0704	5.86335	5.87946	5.80957
0.0705	5.80869	5.86609	5.8006
0.0706	5.86316	5.85367	5.84235
0.0707	5.88797	5.87021	5.80341
0.0708	5.904	5.89597	5.84357
0.0709	5.86149	5.87702	5.90696
0.071	5.87079	5.8689	5.78547
0.0711	5.83435	5.85196	5.77555
0.0712	5.85035	5.92777	5.80307
0.0713	5.86042	5.83857	5.87546
0.0714	5.78247	5.86737	5.83051
0.0715	5.89142	5.87864	5.91043
0.0716	5.77463	5.84797	5.81992
0.0717	5.81452	5.93015	5.77753
0.0718	5.85233	5.8537	5.86853
0.0719	5.85071	5.92554	5.86954
0.072	5.88105	5.87009	5.78659
0.0721	5.84748	5.86649	5.83268
0.0722	5.86539	5.76578	5.73844
0.0723	5.85852	5.8628	5.80646
0.0724	5.80753	5.87861	5.79859
0.0725	5.86194	5.9018	5.83146
0.0726	5.86188	5.85407	5.83292
0.0727	5.85691	5.90799	5.78937
0.0728	5.88749	5.85975	5.79563
0.0729	5.77405	5.85456	5.86368
0.073	5.84519	5.87384	5.80625
0.0731	5.85813	5.84366	5.8447
0.0732	5.81372	5.83609	5.73746
0.0733	5.8526	5.87482	5.81864
0.0734	5.818	5.9184	5.81305
0.0735	5.92325	5.77369	5.85062
0.0736	5.85657	5.88071	5.86536
0.0737	5.82102	5.88987	5.81116
0.0738	5.87528	5.8686	5.79441
0.0739	5.86048	5.8898	5.78965
0.074	5.89292	5.82746	5.85807
0.0741	5.77744	5.83509	5.85916
0.0742	5.8859	5.87986	5.81943
0.0743	5.85886	5.83024	5.84424
0.0744	5.84711	5.87159	5.80725
0.0745	5.79685	5.89011	5.85126
0.0746	5.82441	5.86188	5.86338
0.0747	5.82096	5.86515	5.83826
0.0748	5.88352	5.87455	5.75461
0.0749	5.81476	5.77762	5.83469
0.075	5.84592	5.80375	5.87058
0.0751	5.74909	5.89853	5.78751
0.0752	5.83829	5.97141	5.81409
0.0753	5.89747	5.82709	5.8172
0.0754	5.79779	5.835	5.76203
0.0755	5.85828	5.81995	5.86966
0.0756	5.84082	5.85477	5.77546
0.0757	5.82584	5.90888	5.76151
0.0758	5.84174	5.94785	5.82352
0.0759	5.84427	5.85621	5.8104
0.076	5.81168	5.78049	5.7869
0.0761	5.81235	5.87699	5.84949
0.0762	5.79862	5.8436	5.82282
0.0763	5.82813	5.82761	5.85132
0.0764	5.82596	5.84915	5.8595
0.0765	5.80393	5.84366	5.80936
0.0766	5.87314	5.8303	5.80326
0.0767	5.85797	5.8494	5.79325
0.0768	5.85102	5.88611	5.84232
0.0769	5.83316	5.91834	5.87906
0.077	5.848	5.89957	5.87668
0.0771	5.85834	5.84064	5.76163
0.0772	5.84964	5.80353	5.83573
0.0773	5.87809	5.80347	5.82779
0.0774	5.87375	5.89222	5.79767
0.0775	5.83222	5.84919	5.85544
0.0776	5.80735	5.85743	5.83292
0.0777	5.85709	5.89054	5.80597
0.0778	5.80768	5.78916	5.80454
0.0779	5.79218	5.81015	5.86374
0.078	5.84156	5.82968	5.80115
0.0781	5.82755	5.77426	5.79587
0.0782	5.83927	5.91187	5.80521
0.0783	5.73151	5.82608	5.8021
0.0784	5.8718	5.75946	5.77951
0.0785	5.80561	5.83548	5.8686
0.0786	5.80802	5.84095	5.85886
0.0787	5.79743	5.88663	5.84629
0.0788	5.76593	5.79337	5.86078
0.0789	5.85416	5.8404	5.84311
0.079	5.8389	5.88495	5.72208
0.0791	5.74707	5.80051	5.75943
0.0792	5.79633	5.7938	5.82486
0.0793	5.82941	5.83997	5.77881
0.0794	5.83881	5.91965	5.86319
0.0795	5.79444	5.85263	5.80478
0.0796	5.82117	5.80521	5.84382
0.0797	5.8703	5.88834	5.78733
0.0798	5.79966	5.84711	5.85099
0.0799	5.85123	5.85215	5.81324
0.08	5.85602	5.83399	5.71891
0.0801	5.86844	5.85978	5.77457
0.0802	5.86426	5.85642	5.80164
0.0803	5.92231	5.86512	5.72083
0.0804	5.866	5.88819	5.77927
0.0805	5.88373	5.82505	5.83179
0.0806	5.78809	5.84504	5.75531
0.0807	5.84204	5.84793	5.78531
0.0808	5.85999	5.91117	5.71042
0.0809	5.84696	5.82456	5.81263
0.081	5.75361	5.92032	5.81565
0.0811	5.86503	5.89881	5.75776
0.0812	5.80738	5.86518	5.82315
0.0813	5.82456	5.77951	5.80399
0.0814	5.80024	5.85602	5.83414
0.0815	5.82117	5.86008	5.732
0.0816	5.84678	5.89658	5.77869
0.0817	5.78727	5.814	5.86081
0.0818	5.79664	5.89783	5.8125
0.0819	5.77308	5.8906	5.90451
0.082	5.79731	5.84052	5.76249
0.0821	5.84583	5.84333	5.80018
0.0822	5.80222	5.78217	5.80915
0.0823	5.8548	5.81266	5.81305
0.0824	5.79236	5.85718	5.8415
0.0825	5.87607	5.85495	5.80576
0.0826	5.84037	5.77576	5.78327
0.0827	5.83002	5.86026	5.76615
0.0828	5.8331	5.78525	5.79358
0.0829	5.88358	5.85709	5.78357
0.083	5.76893	5.87088	5.8118
0.0831	5.80551	5.80231	5.78864
0.0832	5.77433	5.78653	5.76584
0.0833	5.8324	5.84876	5.81492
0.0834	5.77503	5.79773	5.77463
0.0835	5.79102	5.88227	5.81049
0.0836	5.81842	5.81571	5.78464
0.0837	5.88025	5.82441	5.82456
0.0838	5.81507	5.85321	5.80524
0.0839	5.78092	5.86817	5.84693
0.084	5.79136	5.89386	5.84537
0.0841	5.82013	5.76581	5.801
0.0842	5.79248	5.88944	5.7584
0.0843	5.77375	5.83097	5.81925
0.0844	5.79786	5.86399	5.87046
0.0845	5.84406	5.84098	5.84235
0.0846	5.81787	5.85874	5.79343
0.0847	5.79441	5.83966	5.86625
0.0848	5.81443	5.80762	5.78089
0.0849	5.76068	5.80457	5.75516
0.085	5.83796	5.82618	5.77967
0.0851	5.78077	5.8685	5.85916
0.0852	5.7363	5.83191	5.74222
0.0853	5.82218	5.83911	5.81589
0.0854	5.82596	5.86975	5.78876
0.0855	5.91449	5.84763	5.75797
0.0856	5.79276	5.80924	5.79209
0.0857	5.85984	5.77488	5.75113
0.0858	5.85379	5.89133	5.77619
0.0859	5.73938	5.8404	5.75598
0.086	5.84323	5.84888	5.7988
0.0861	5.77985	5.76038	5.79312
0.0862	5.81656	5.76703	5.75809
0.0863	5.78394	5.82166	5.78226
0.0864	5.83634	5.79865	5.77204
0.0865	5.78592	5.81946	5.83829
0.0866	5.75281	5.90723	5.84052
0.0867	5.84284	5.84177	5.79096
0.0868	5.82062	5.88785	5.78867
0.0869	5.76776	5.85688	5.7584
0.087	5.77555	5.8834	5.81073
0.0871	5.79599	5.87757	5.80893
0.0872	5.81391	5.85764	5.77356
0.0873	5.84345	5.75183	5.76093
0.0874	5.80567	5.79676	5.82907
0.0875	5.82972	5.84842	5.76276
0.0876	5.71653	5.80631	5.79224
0.0877	5.83411	5.73355	5.79358
0.0878	5.77262	5.8237	5.85227
0.0879	5.86329	5.80314	5.84082
0.088	5.87738	5.83676	5.80613
0.0881	5.90155	5.80658	5.83228
0.0882	5.7858	5.79807	5.78104
0.0883	5.79056	5.82175	5.82587
0.0884	5.80011	5.89222	5.76264
0.0885	5.82642	5.89304	5.7778
0.0886	5.79209	5.77488	5.78434
0.0887	5.84653	5.8494	5.78675
0.0888	5.76676	5.75739	5.76911
0.0889	5.80149	5.8631	5.76844
0.089	5.83783	5.8346	5.85975
0.0891	5.82587	5.87064	5.74579
0.0892	5.85025	5.86747	5.78211
0.0893	5.8591	5.80304	5.72165
0.0894	5.74372	5.85007	5.80384
0.0895	5.77097	5.78232	5.80896
0.0896	5.79102	5.80918	5.78409
0.0897	5.86954	5.8422	5.76636
0.0898	5.84378	5.87867	5.77857
0.0899	5.83747	5.84839	5.79615
0.09	5.81186	5.77469	5.76371
0.0901	5.8118	5.83445	5.8273
0.0902	5.85724	5.86414	5.80225
0.0903	5.83515	5.86936	5.77195
0.0904	5.80884	5.8071	5.89926
0.0905	5.84504	5.78647	5.86622
0.0906	5.76401	5.83133	5.8386
0.0907	5.8151	5.86329	5.76227
0.0908	5.86881	5.80951	5.81257
0.0909	5.85285	5.88102	5.80875
0.091	5.85636	5.85782	5.75785
0.0911	5.81607	5.85144	5.77604
0.0912	5.84574	5.79367	5.75
0.0913	5.80957	5.88825	5.72126
0.0914	5.72599	5.83121	5.78138
0.0915	5.90378	5.83826	5.82654
0.0916	5.83057	5.85474	5.85392
0.0917	5.8118	5.83252	5.72419
0.0918	5.85303	5.88327	5.75409
0.0919	5.78867	5.84241	5.82505
0.092	5.92594	5.91101	5.75507
0.0921	5.85923	5.78891	5.83457
0.0922	5.8617	5.80423	5.80951
0.0923	5.79193	5.8049	5.78363
0.0924	5.79258	5.79798	5.76142
0.0925	5.82749	5.81049	5.7479
0.0926	5.69492	5.73841	5.84824
0.0927	5.80368	5.76413	5.81824
0.0928	5.80704	5.82679	5.81986
0.0929	5.81391	5.81891	5.7569
0.093	5.78916	5.88712	5.77924
0.0931	5.82694	5.78797	5.75116
0.0932	5.80042	5.82312	5.76825
0.0933	5.76929	5.83689	5.88544
0.0934	5.83161	5.84421	5.82062
0.0935	5.80875	5.85318	5.72245
0.0936	5.77134	5.86643	5.75089
0.0937	5.81604	5.78098	5.89029
0.0938	5.83097	5.78235	5.8451
0.0939	5.79001	5.84156	5.82859
0.094	5.83554	5.92429	5.86078
0.0941	5.81864	5.86164	5.76386
0.0942	5.85575	5.79651	5.77884
0.0943	5.90357	5.82468	5.74802
0.0944	5.86515	5.8219	5.83091
0.0945	5.80027	5.85257	5.78745
0.0946	5.80249	5.79905	5.79078
0.0947	5.85895	5.78968	5.75974
0.0948	5.80262	5.81137	5.75657
0.0949	5.83362	5.81946	5.82331
0.095	5.81107	5.91315	5.76148
0.0951	5.82068	5.79608	5.77466
0.0952	5.82779	5.84189	5.72315
0.0953	5.80237	5.76813	5.81607
0.0954	5.83139	5.78171	5.75507
0.0955	5.79154	5.78122	5.84467
0.0956	5.86594	5.86921	5.89985
0.0957	5.77231	5.73597	5.77518
0.0958	5.79358	5.76987	5.81708
0.0959	5.82474	5.86179	5.81711
0.096	5.78702	5.79953	5.8259
0.0961	5.8017	5.85773	5.78397
0.0962	5.8516	5.72077	5.89002
0.0963	5.8349	5.81153	5.72159
0.0964	5.76715	5.87006	5.76984
0.0965	5.849	5.8602	5.76661
0.0966	5.76743	5.78037	5.73871
0.0967	5.80835	5.80497	5.80762
0.0968	5.86106	5.89841	5.81043
0.0969	5.8418	5.81189	5.79383
0.097	5.88199	5.74622	5.77024
0.0971	5.84076	5.85245	5.78223
0.0972	5.81281	5.84497	5.86496
0.0973	5.75049	5.80948	5.78733
0.0974	5.72119	5.75742	5.85477
0.0975	5.82605	5.76386	5.74936
0.0976	5.76871	5.80472	5.82477
0.0977	5.77732	5.80433	5.77918
0.0978	5.90372	5.83426	5.78556
0.0979	5.86609	5.75092	5.71979
0.098	5.81757	5.90451	5.79401
0.0981	5.79075	5.82068	5.80542
0.0982	5.84617	5.81711	5.75565
0.0983	5.78132	5.79416	5.80194
0.0984	5.77112	5.81467	5.7851
0.0985	5.82175	5.86542	5.75669
0.0986	5.8089	5.74927	5.74714
0.0987	5.75217	5.84382	5.73929
0.0988	5.75367	5.82294	5.78229
0.0989	5.82718	5.87189	5.78431
0.099	5.76129	5.78083	5.81687
0.0991	5.79029	5.7825	5.78281
0.0992	5.86725	5.76807	5.72739
0.0993	5.77655	5.75888	5.81452
0.0994	5.77744	5.8295	5.81784
0.0995	5.83097	5.87406	5.78391
0.0996	5.81946	5.83756	5.81357
0.0997	5.80194	5.83441	5.81043
[truncated: 3 more rows]

## Sheet: Rear head
mantATP binding trace	E236A-WT	E236A rear head		Fig.4-suppl 2
Time (s)	Fl1	Fl2
0.0001	3.53287	3.51966
0.0002	3.60814	3.53092
0.0003	3.61807	3.65456
0.0004	3.57503	3.58444
0.0005	3.58605	3.65888
0.0006	3.68269	3.59828
0.0007	3.73767	3.53533
0.0008	3.72951	3.60309
0.0009	3.64116	3.68076
0.001	3.73325	3.59044
0.0011	3.64732	3.71683
0.0012	3.67575	3.60286
0.0013	3.68919	3.70432
0.0014	3.72124	3.62476
0.0015	3.64815	3.69426
0.0016	3.73706	3.72258
0.0017	3.77246	3.62549
0.0018	3.74696	3.67293
0.0019	3.73859	3.74167
0.002	3.774	3.7747
0.0021	3.76634	3.66773
0.0022	3.78922	3.71242
0.0023	3.92204	3.74941
0.0024	3.79201	3.71402
0.0025	3.78157	3.78792
0.0026	3.808	3.73357
0.0027	3.80592	3.72965
0.0028	3.7784	3.81081
0.0029	3.83	3.77254
0.003	3.91971	3.8084
0.0031	3.7887	3.77326
0.0032	3.87148	3.75691
0.0033	3.80846	3.82868
0.0034	3.97579	3.89032
0.0035	3.91193	3.78789
0.0036	3.99156	3.67528
0.0037	3.88268	3.78841
0.0038	3.90479	3.8286
0.0039	3.86994	3.75572
0.004	3.83264	3.70921
0.0041	3.8353	3.85898
0.0042	3.79936	3.84375
0.0043	3.90477	3.76804
0.0044	3.94667	3.89282
0.0045	3.9509	3.88231
0.0046	3.84247	3.8401
0.0047	3.82121	3.78236
0.0048	3.91351	3.81749
0.0049	3.89891	3.85451
0.005	3.90572	3.88773
0.0051	3.86017	3.84764
0.0052	3.94724	3.87769
0.0053	3.89368	3.91606
0.0054	3.91416	3.91034
0.0055	3.92258	3.84091
0.0056	3.96607	3.94411
0.0057	3.90057	3.82275
0.0058	4.00051	3.84828
0.0059	3.94342	3.85544
0.006	3.92903	3.90601
0.0061	3.8885	3.88333
0.0062	3.93248	3.85839
0.0063	3.96956	3.94248
0.0064	3.96748	3.89452
0.0065	3.97104	3.88332
0.0066	3.97353	3.85487
0.0067	3.88405	3.9408
0.0068	4.08394	3.86199
0.0069	3.97061	3.88594
0.007	4.00527	3.9905
0.0071	3.95369	3.95607
0.0072	4.14032	3.87663
0.0073	4.05029	3.94631
0.0074	4.02208	3.98993
0.0075	4.1023	4.03938
0.0076	4.06497	4.01801
0.0077	4.02199	3.91304
0.0078	4.02789	4.03545
0.0079	3.99611	3.97412
0.008	4.01527	3.94287
0.0081	4.08678	4.06555
0.0082	4.03796	4.07239
0.0083	4.03102	4.0143
0.0084	3.99648	3.90625
0.0085	3.97539	3.97374
0.0086	4.04096	3.96086
0.0087	4.05599	4.07268
0.0088	4.06123	4.00035
0.0089	4.07874	3.98084
0.009	4.10689	4.04308
0.0091	4.02503	3.97928
0.0092	4.11093	4.08658
0.0093	4.10059	4.04926
0.0094	4.1075	4.03917
0.0095	4.15735	3.98038
0.0096	4.00871	3.99822
0.0097	4.07932	4.06758
0.0098	4.12322	3.98248
0.0099	4.15955	4.05693
0.01	4.09764	4.0255
0.0101	4.12029	4.10758
0.0102	4.19945	4.09348
0.0103	4.17331	4.02994
0.0104	4.03677	4.10312
0.0105	4.11493	4.12425
0.0106	4.09068	4.08788
0.0107	4.0919	4.18315
0.0108	4.16242	4.04607
0.0109	4.14227	4.08016
0.011	4.07726	4.1147
0.0111	4.16837	4.09811
0.0112	4.1443	4.11945
0.0113	4.07718	4.08171
0.0114	4.18121	4.13809
0.0115	4.03957	4.15813
0.0116	4.12271	4.13545
0.0117	4.28118	4.13233
0.0118	4.14527	4.07396
0.0119	4.19687	4.1035
0.012	4.11858	4.10935
0.0121	4.05696	4.09197
0.0122	4.13968	4.0416
0.0123	4.20877	4.10752
0.0124	4.15593	4.06966
0.0125	4.19486	4.07158
0.0126	4.21034	4.07588
0.0127	4.17996	4.08031
0.0128	4.22763	4.04648
0.0129	4.16867	4.22781
0.013	4.21898	4.24841
0.0131	4.12758	4.05751
0.0132	4.15682	4.18306
0.0133	4.20554	4.27071
0.0134	4.10565	4.14137
0.0135	4.17137	4.11289
0.0136	4.11208	4.22006
0.0137	4.20352	4.1651
0.0138	4.17928	4.17728
0.0139	4.18382	4.00359
0.014	4.24759	4.17789
0.0141	4.09809	4.22858
0.0142	4.22902	4.24445
0.0143	4.21976	4.16034
0.0144	4.22937	4.17552
0.0145	4.28646	4.20076
0.0146	4.1729	4.2227
0.0147	4.24323	4.19338
0.0148	4.30647	4.23444
0.0149	4.22153	4.16322
0.015	4.20067	4.20059
0.0151	4.25745	4.25627
0.0152	4.2561	4.13486
0.0153	4.23192	4.30815
0.0154	4.15051	4.18297
0.0155	4.29802	4.09708
0.0156	4.24855	4.18302
0.0157	4.20116	4.19553
0.0158	4.2108	4.12393
0.0159	4.11104	4.21065
0.016	4.20508	4.25948
0.0161	4.20146	4.16756
0.0162	4.22481	4.31095
0.0163	4.21874	4.16554
0.0164	4.26619	4.16689
0.0165	4.21329	4.2236
0.0166	4.27196	4.14327
0.0167	4.33728	4.21002
0.0168	4.26134	4.17877
0.0169	4.2791	4.22495
0.017	4.20218	4.25905
0.0171	4.27626	4.21706
0.0172	4.16675	4.17749
0.0173	4.16531	4.22602
0.0174	4.25052	4.22298
0.0175	4.23113	4.25559
0.0176	4.29033	4.25966
0.0177	4.21962	4.23493
0.0178	4.18099	4.25286
0.0179	4.17262	4.31693
0.018	4.19569	4.24115
0.0181	4.22748	4.32512
0.0182	4.22815	4.24558
0.0183	4.28333	4.23785
0.0184	4.25916	4.17767
0.0185	4.16774	4.30243
0.0186	4.26015	4.16251
0.0187	4.27925	4.21454
0.0188	4.28996	4.22801
0.0189	4.40987	4.3414
0.019	4.26625	4.21944
0.0191	4.32529	4.1805
0.0192	4.34197	4.29094
0.0193	4.25226	4.29263
0.0194	4.24516	4.12209
0.0195	4.24234	4.29593
0.0196	4.29357	4.25743
0.0197	4.33542	4.25051
0.0198	4.35365	4.32839
0.0199	4.39031	4.35295
0.02	4.26541	4.31285
0.0201	4.18208	4.28679
0.0202	4.3391	4.21134
0.0203	4.28984	4.27269
0.0204	4.36751	4.30051
0.0205	4.42461	4.26854
0.0206	4.32894	4.2652
0.0207	4.26566	4.20575
0.0208	4.34419	4.21614
0.0209	4.44618	4.27617
0.021	4.25121	4.29639
0.0211	4.38066	4.27553
0.0212	4.3559	4.31902
0.0213	4.36395	4.38394
0.0214	4.27594	4.27358
0.0215	4.38258	4.39505
0.0216	4.33843	4.30103
0.0217	4.39325	4.31079
0.0218	4.36905	4.46037
0.0219	4.31111	4.30875
0.022	4.39398	4.24275
0.0221	4.30936	4.32277
0.0222	4.36069	4.35883
0.0223	4.33553	4.31829
0.0224	4.16441	4.31023
0.0225	4.36371	4.34131
0.0226	4.42284	4.18796
0.0227	4.32718	4.33621
0.0228	4.3643	4.2522
0.0229	4.23514	4.33994
0.023	4.37116	4.24108
0.0231	4.43218	4.31053
0.0232	4.31065	4.29213
0.0233	4.4082	4.31342
0.0234	4.30809	4.32518
0.0235	4.39426	4.43262
0.0236	4.3263	4.29209
0.0237	4.36086	4.27231
0.0238	4.34892	4.24184
0.0239	4.41257	4.31868
0.024	4.43517	4.34438
0.0241	4.41718	4.41451
0.0242	4.39427	4.30585
0.0243	4.34366	4.34773
0.0244	4.37747	4.36847
0.0245	4.49983	4.3582
0.0246	4.43787	4.27779
0.0247	4.29608	4.3504
0.0248	4.37569	4.21868
0.0249	4.42021	4.19339
0.025	4.48435	4.31998
0.0251	4.31391	4.29099
0.0252	4.35175	4.26695
0.0253	4.30093	4.32747
0.0254	4.44791	4.38976
0.0255	4.35741	4.30437
0.0256	4.29648	4.33591
0.0257	4.37438	4.29842
0.0258	4.34798	4.35649
0.0259	4.30881	4.36597
0.026	4.40038	4.43674
0.0261	4.42444	4.32016
0.0262	4.34023	4.3522
0.0263	4.36249	4.35285
0.0264	4.33766	4.40998
0.0265	4.35701	4.35675
0.0266	4.35495	4.32492
0.0267	4.3748	4.31078
0.0268	4.53677	4.41113
0.0269	4.30872	4.47615
0.027	4.4489	4.35072
0.0271	4.29273	4.31771
0.0272	4.49507	4.31825
0.0273	4.43295	4.38318
0.0274	4.40013	4.33553
0.0275	4.44072	4.40602
0.0276	4.38764	4.37697
0.0277	4.4424	4.32556
0.0278	4.38964	4.33722
0.0279	4.414	4.31909
0.028	4.50273	4.42143
0.0281	4.39823	4.43247
0.0282	4.37694	4.41515
0.0283	4.36167	4.37979
0.0284	4.42046	4.3273
0.0285	4.40062	4.44562
0.0286	4.46813	4.24196
0.0287	4.48073	4.27887
0.0288	4.38309	4.31877
0.0289	4.42076	4.41263
0.029	4.41329	4.27931
0.0291	4.47646	4.30913
0.0292	4.39505	4.38181
0.0293	4.3996	4.44315
0.0294	4.36214	4.35497
0.0295	4.37874	4.37622
0.0296	4.50499	4.34056
0.0297	4.38565	4.35646
0.0298	4.51218	4.43956
0.0299	4.4077	4.33142
0.03	4.47319	4.4415
0.0301	4.49819	4.29311
0.0302	4.51405	4.39128
0.0303	4.45386	4.45859
0.0304	4.43269	4.4165
0.0305	4.48537	4.36232
0.0306	4.59927	4.45922
0.0307	4.46613	4.31848
0.0308	4.46744	4.49153
0.0309	4.37767	4.42099
0.031	4.46822	4.35759
0.0311	4.47769	4.43469
0.0312	4.40161	4.29036
0.0313	4.51816	4.37125
0.0314	4.48606	4.35953
0.0315	4.40998	4.35538
0.0316	4.47118	4.34999
0.0317	4.44974	4.44351
0.0318	4.42821	4.39575
0.0319	4.5022	4.32596
0.032	4.46419	4.42443
0.0321	4.47038	4.47862
0.0322	4.47284	4.43631
0.0323	4.47783	4.31532
0.0324	4.38729	4.4108
0.0325	4.49256	4.41211
0.0326	4.49776	4.42752
0.0327	4.50469	4.49167
0.0328	4.51506	4.36015
0.0329	4.51685	4.47038
0.033	4.43843	4.46184
0.0331	4.53429	4.43167
0.0332	4.4541	4.39456
0.0333	4.5715	4.403
0.0334	4.42459	4.55261
0.0335	4.46124	4.41622
0.0336	4.49724	4.48827
0.0337	4.47864	4.52202
0.0338	4.48778	4.3933
0.0339	4.56213	4.43561
0.034	4.50984	4.46771
0.0341	4.51245	4.46292
0.0342	4.50054	4.42865
0.0343	4.51804	4.4758
0.0344	4.46358	4.37425
0.0345	4.41763	4.4465
0.0346	4.52348	4.36212
0.0347	4.4413	4.37114
0.0348	4.52846	4.39917
0.0349	4.45834	4.34657
0.035	4.47371	4.48477
0.0351	4.54654	4.32907
0.0352	4.55902	4.4189
0.0353	4.52898	4.43259
0.0354	4.45389	4.39908
0.0355	4.57016	4.47415
0.0356	4.56914	4.45656
0.0357	4.50923	4.5262
0.0358	4.56616	4.47481
0.0359	4.50534	4.43169
0.036	4.50575	4.46489
0.0361	4.61809	4.42706
0.0362	4.65709	4.38358
0.0363	4.45639	4.52219
0.0364	4.53755	4.54636
0.0365	4.56551	4.39276
0.0366	4.49408	4.56481
0.0367	4.56745	4.48767
0.0368	4.60292	4.52944
0.0369	4.61873	4.4436
0.037	4.45566	4.50231
0.0371	4.6004	4.50459
0.0372	4.64581	4.47286
0.0373	4.56256	4.4648
0.0374	4.48825	4.47078
0.0375	4.61588	4.3982
0.0376	4.54303	4.47203
0.0377	4.54453	4.45712
0.0378	4.49718	4.59325
0.0379	4.54961	4.44992
0.038	4.56917	4.40559
0.0381	4.51653	4.51732
0.0382	4.52051	4.55228
0.0383	4.51845	4.53554
0.0384	4.64586	4.59999
0.0385	4.5138	4.42432
0.0386	4.54395	4.53951
0.0387	4.56355	4.55997
0.0388	4.55092	4.51474
0.0389	4.54167	4.53349
0.039	4.5351	4.51836
0.0391	4.519	4.46065
0.0392	4.5435	4.6059
0.0393	4.51718	4.43034
0.0394	4.45296	4.46602
0.0395	4.4561	4.45458
0.0396	4.60915	4.56207
0.0397	4.66283	4.47196
0.0398	4.54715	4.45403
0.0399	4.49329	4.52208
0.04	4.68263	4.48058
0.0401	4.50826	4.49932
0.0402	4.54868	4.43971
0.0403	4.5669	4.52561
0.0404	4.5109	4.49205
0.0405	4.55345	4.4807
0.0406	4.50841	4.44449
0.0407	4.56458	4.44908
0.0408	4.48825	4.60135
0.0409	4.52116	4.44866
0.041	4.6801	4.49205
0.0411	4.72392	4.52304
0.0412	4.60645	4.42471
0.0413	4.58595	4.50095
0.0414	4.59136	4.47356
0.0415	4.59954	4.45882
0.0416	4.64058	4.5958
0.0417	4.56107	4.50499
0.0418	4.60086	4.61818
0.0419	4.48431	4.56441
0.042	4.66216	4.50507
0.0421	4.59482	4.49504
0.0422	4.66655	4.55533
0.0423	4.55026	4.54692
0.0424	4.58321	4.58911
0.0425	4.64461	4.53861
0.0426	4.55495	4.51714
0.0427	4.60777	4.57137
0.0428	4.57561	4.49515
0.0429	4.5121	4.57376
0.043	4.52109	4.54106
0.0431	4.54538	4.53607
0.0432	4.59967	4.52423
0.0433	4.6546	4.53507
0.0434	4.58093	4.53781
0.0435	4.57784	4.5282
0.0436	4.5454	4.46115
0.0437	4.5389	4.62519
0.0438	4.62004	4.53681
0.0439	4.6563	4.60839
0.044	4.6638	4.50917
0.0441	4.58495	4.47519
0.0442	4.65219	4.5891
0.0443	4.64244	4.50189
0.0444	4.61997	4.56168
0.0445	4.57036	4.57532
0.0446	4.67714	4.57627
0.0447	4.51084	4.57594
0.0448	4.63764	4.47127
0.0449	4.53597	4.57874
0.045	4.62659	4.49968
0.0451	4.63251	4.48325
0.0452	4.61478	4.53316
0.0453	4.53996	4.50421
0.0454	4.57529	4.55492
0.0455	4.64131	4.69286
0.0456	4.57306	4.56598
0.0457	4.71265	4.62569
0.0458	4.48319	4.45781
0.0459	4.67172	4.49559
0.046	4.53665	4.60761
0.0461	4.70451	4.57716
0.0462	4.60083	4.56633
0.0463	4.68547	4.58675
0.0464	4.66165	4.53667
0.0465	4.5754	4.56615
0.0466	4.64148	4.54074
0.0467	4.58879	4.54752
0.0468	4.5874	4.60651
0.0469	4.65621	4.59892
0.047	4.62715	4.5199
0.0471	4.64136	4.50023
0.0472	4.65738	4.54489
0.0473	4.65128	4.63861
0.0474	4.6277	4.6861
0.0475	4.56375	4.52727
0.0476	4.64824	4.54646
0.0477	4.6741	4.56238
0.0478	4.50234	4.52846
0.0479	4.63764	4.44052
0.048	4.63866	4.64897
0.0481	4.61839	4.49201
0.0482	4.59467	4.72754
0.0483	4.54019	4.64586
0.0484	4.59349	4.56009
0.0485	4.58252	4.61403
0.0486	4.61791	4.64293
0.0487	4.63025	4.63774
0.0488	4.51885	4.64359
0.0489	4.7466	4.59932
0.049	4.64737	4.47833
0.0491	4.62338	4.42246
0.0492	4.62941	4.63262
0.0493	4.61037	4.55919
0.0494	4.53401	4.57219
0.0495	4.50588	4.52155
0.0496	4.59921	4.56189
0.0497	4.59722	4.61885
0.0498	4.68918	4.60712
0.0499	4.64665	4.55624
0.05	4.52423	4.62218
0.0501	4.57704	4.6617
0.0502	4.59975	4.56612
0.0503	4.61038	4.62833
0.0504	4.68515	4.56235
0.0505	4.53468	4.59926
0.0506	4.63725	4.70038
0.0507	4.6005	4.59691
0.0508	4.62084	4.53993
0.0509	4.63561	4.62161
0.051	4.65436	4.60005
0.0511	4.63303	4.54129
0.0512	4.65987	4.64554
0.0513	4.6254	4.60703
0.0514	4.55647	4.55512
0.0515	4.66525	4.61652
0.0516	4.631	4.59603
0.0517	4.49957	4.55658
0.0518	4.57361	4.57466
0.0519	4.75408	4.65654
0.052	4.65613	4.5582
0.0521	4.59767	4.61604
0.0522	4.60697	4.476
0.0523	4.63747	4.55794
0.0524	4.52866	4.53928
0.0525	4.65318	4.56792
0.0526	4.59689	4.64171
0.0527	4.69583	4.65308
0.0528	4.64511	4.61221
0.0529	4.63271	4.63548
0.053	4.6463	4.59445
0.0531	4.65662	4.65616
0.0532	4.65932	4.5416
0.0533	4.59857	4.61986
0.0534	4.64867	4.57002
0.0535	4.65416	4.66007
0.0536	4.65885	4.47943
0.0537	4.67647	4.70053
0.0538	4.68242	4.58978
0.0539	4.6252	4.62331
0.054	4.54459	4.55258
0.0541	4.77023	4.58708
0.0542	4.62816	4.58431
0.0543	4.69608	4.5802
0.0544	4.62741	4.68102
0.0545	4.60936	4.57343
0.0546	4.60077	4.5432
0.0547	4.69086	4.55779
0.0548	4.64999	4.60733
0.0549	4.63545	4.60388
0.055	4.66477	4.63823
0.0551	4.57318	4.64325
0.0552	4.7889	4.60387
0.0553	4.67468	4.62129
0.0554	4.61937	4.60094
0.0555	4.64948	4.57184
0.0556	4.69898	4.55248
0.0557	4.59473	4.60281
0.0558	4.68149	4.58772
0.0559	4.6933	4.63493
0.056	4.76169	4.7195
0.0561	4.68294	4.63344
0.0562	4.58763	4.58196
0.0563	4.70949	4.74578
0.0564	4.56412	4.68299
0.0565	4.69733	4.65523
0.0566	4.68743	4.72968
0.0567	4.61932	4.67334
0.0568	4.71822	4.63722
0.0569	4.62615	4.62953
0.057	4.73987	4.56667
0.0571	4.79732	4.68225
0.0572	4.62468	4.59822
0.0573	4.72311	4.56615
0.0574	4.60204	4.54237
0.0575	4.63582	4.61489
0.0576	4.70732	4.58255
0.0577	4.51747	4.68471
0.0578	4.61652	4.63529
0.0579	4.83631	4.60901
0.058	4.64816	4.73738
0.0581	4.60326	4.63121
0.0582	4.72196	4.62604
0.0583	4.58743	4.57204
0.0584	4.69815	4.64205
0.0585	4.67197	4.66261
0.0586	4.66747	4.68639
0.0587	4.61582	4.69838
0.0588	4.63329	4.64737
0.0589	4.56893	4.6406
0.059	4.72734	4.53418
0.0591	4.69795	4.66559
0.0592	4.65256	4.60015
0.0593	4.60938	4.60173
0.0594	4.59297	4.65088
0.0595	4.6619	4.6304
0.0596	4.70688	4.67616
0.0597	4.58202	4.61112
0.0598	4.65524	4.70362
0.0599	4.7119	4.60864
0.06	4.69801	4.6143
0.0601	4.70485	4.51799
0.0602	4.71791	4.623
0.0603	4.67781	4.67377
0.0604	4.67456	4.68808
0.0605	4.66071	4.6355
0.0606	4.66907	4.69043
0.0607	4.6597	4.70633
0.0608	4.67915	4.70174
0.0609	4.68065	4.57675
0.061	4.75974	4.68207
0.0611	4.62018	4.70723
0.0612	4.72078	4.59145
0.0613	4.63883	4.59914
0.0614	4.68196	4.57883
0.0615	4.6301	4.59453
0.0616	4.59451	4.63785
0.0617	4.62517	4.66782
0.0618	4.65529	4.68102
0.0619	4.59734	4.69785
0.062	4.68715	4.58084
0.0621	4.68352	4.56423
0.0622	4.75215	4.65967
0.0623	4.73772	4.61623
0.0624	4.72704	4.63466
0.0625	4.65973	4.65701
0.0626	4.75687	4.71837
0.0627	4.7018	4.66965
0.0628	4.65874	4.67627
0.0629	4.79263	4.69548
0.063	4.65737	4.61194
0.0631	4.67218	4.72736
0.0632	4.65349	4.66728
0.0633	4.64346	4.62787
0.0634	4.69513	4.67789
0.0635	4.66655	4.75632
0.0636	4.59851	4.67385
0.0637	4.58307	4.71059
0.0638	4.6127	4.55757
0.0639	4.57921	4.6008
0.064	4.68996	4.6622
0.0641	4.68834	4.61904
0.0642	4.65352	4.73572
0.0643	4.78922	4.64925
0.0644	4.62699	4.7099
0.0645	4.61637	4.57158
0.0646	4.63252	4.60738
0.0647	4.68602	4.71462
0.0648	4.72257	4.67275
0.0649	4.65901	4.64705
0.065	4.56735	4.67487
0.0651	4.66373	4.64797
0.0652	4.63672	4.63986
0.0653	4.65912	4.72147
0.0654	4.74494	4.65659
0.0655	4.73895	4.71457
0.0656	4.6855	4.7269
0.0657	4.75552	4.79785
0.0658	4.69006	4.74819
0.0659	4.65253	4.67278
0.066	4.71088	4.69067
0.0661	4.68337	4.75156
0.0662	4.58489	4.64112
0.0663	4.69087	4.67211
0.0664	4.63208	4.73111
0.0665	4.691	4.65227
0.0666	4.72884	4.50212
0.0667	4.76082	4.71485
0.0668	4.71083	4.67375
0.0669	4.79677	4.61737
0.067	4.69036	4.73682
0.0671	4.82202	4.71578
0.0672	4.64224	4.67819
0.0673	4.87016	4.70116
0.0674	4.73488	4.69011
0.0675	4.71312	4.64641
0.0676	4.80728	4.73235
0.0677	4.72208	4.82092
0.0678	4.71675	4.70331
0.0679	4.64264	4.69074
0.068	4.79298	4.73133
0.0681	4.71205	4.63994
0.0682	4.67302	4.66893
0.0683	4.68074	4.63519
0.0684	4.66138	4.64999
0.0685	4.72635	4.63945
0.0686	4.69904	4.70847
0.0687	4.76695	4.64592
0.0688	4.64023	4.62833
0.0689	4.66962	4.65782
0.069	4.73215	4.72139
0.0691	4.74263	4.75289
0.0692	4.69409	4.64905
0.0693	4.8068	4.68813
0.0694	4.79646	4.67505
0.0695	4.76917	4.68477
0.0696	4.72923	4.67003
0.0697	4.78151	4.69002
0.0698	4.72164	4.7312
0.0699	4.7009	4.69722
0.07	4.85108	4.67682
0.0701	4.76799	4.57204
0.0702	4.70427	4.61989
0.0703	4.71909	4.65724
0.0704	4.70683	4.68012
0.0705	4.71701	4.70282
0.0706	4.71353	4.62802
0.0707	4.75873	4.73104
0.0708	4.70598	4.68576
0.0709	4.67703	4.68643
0.071	4.77493	4.71872
0.0711	4.76938	4.67812
0.0712	4.7926	4.72345
0.0713	4.69156	4.61775
0.0714	4.81476	4.59674
0.0715	4.66237	4.69666
0.0716	4.71819	4.64653
0.0717	4.85217	4.68164
0.0718	4.74626	4.64507
0.0719	4.70751	4.58925
0.072	4.69652	4.71437
0.0721	4.69808	4.63645
0.0722	4.68195	4.68089
0.0723	4.70171	4.67148
0.0724	4.76712	4.72771
0.0725	4.70351	4.66248
0.0726	4.64484	4.66933
0.0727	4.74043	4.71014
0.0728	4.69165	4.68703
0.0729	4.78217	4.70546
0.073	4.72272	4.64867
0.0731	4.81075	4.63489
0.0732	4.78684	4.70635
0.0733	4.72223	4.67638
0.0734	4.62909	4.76906
0.0735	4.7117	4.70967
0.0736	4.82329	4.6657
0.0737	4.71211	4.81452
0.0738	4.74343	4.75752
0.0739	4.77951	4.64635
0.074	4.77088	4.70444
0.0741	4.69338	4.71066
0.0742	4.73599	4.64183
0.0743	4.75325	4.66164
0.0744	4.81346	4.66333
0.0745	4.71065	4.65347
0.0746	4.86272	4.73114
0.0747	4.81079	4.73708
0.0748	4.72232	4.7729
0.0749	4.73764	4.70925
0.075	4.72472	4.69542
0.0751	4.75325	4.75688
0.0752	4.77588	4.80222
0.0753	4.70299	4.61276
0.0754	4.75804	4.6299
0.0755	4.69147	4.73496
0.0756	4.71442	4.61348
0.0757	4.64624	4.71535
0.0758	4.80206	4.73515
0.0759	4.62897	4.67743
0.076	4.86565	4.76698
0.0761	4.74332	4.72821
0.0762	4.78166	4.72257
0.0763	4.65982	4.68909
0.0764	4.79076	4.81659
0.0765	4.87904	4.78504
0.0766	4.64067	4.72931
0.0767	4.71045	4.68285
0.0768	4.74559	4.73256
0.0769	4.7188	4.7441
0.077	4.70731	4.69498
0.0771	4.75226	4.65207
0.0772	4.64382	4.66232
0.0773	4.70876	4.72189
0.0774	4.80435	4.72473
0.0775	4.79852	4.63735
0.0776	4.87587	4.69293
0.0777	4.74925	4.78146
0.0778	4.7907	4.6848
0.0779	4.8882	4.74374
0.078	4.79628	4.69626
0.0781	4.71039	4.75974
0.0782	4.67244	4.77741
0.0783	4.8255	4.78955
0.0784	4.69374	4.7166
0.0785	4.85561	4.77152
0.0786	4.77896	4.69289
0.0787	4.82155	4.74657
0.0788	4.78411	4.67432
0.0789	4.67249	4.65785
0.079	4.68944	4.78461
0.0791	4.77567	4.77869
0.0792	4.87119	4.76785
0.0793	4.90399	4.78449
0.0794	4.74933	4.66596
0.0795	4.74507	4.7988
0.0796	4.77756	4.72882
0.0797	4.78517	4.64133
0.0798	4.64459	4.80771
0.0799	4.70052	4.80113
0.08	4.7437	4.71198
0.0801	4.85661	4.79456
0.0802	4.78768	4.71541
0.0803	4.7807	4.72006
0.0804	4.76135	4.74658
0.0805	4.75406	4.77619
0.0806	4.74547	4.84519
0.0807	4.8505	4.65509
0.0808	4.74742	4.78926
0.0809	4.77286	4.80998
0.081	4.72443	4.73087
0.0811	4.81658	4.77461
0.0812	4.78571	4.72377
0.0813	4.77274	4.77223
0.0814	4.8687	4.74602
0.0815	4.79747	4.71382
0.0816	4.79665	4.70592
0.0817	4.7402	4.68457
0.0818	4.75755	4.78934
0.0819	4.8259	4.80534
0.082	4.72357	4.79436
0.0821	4.81508	4.80373
0.0822	4.75098	4.70517
0.0823	4.82529	4.78023
0.0824	4.80193	4.78504
0.0825	4.74819	4.75969
0.0826	4.75617	4.75527
0.0827	4.82135	4.83852
0.0828	4.8284	4.61214
0.0829	4.83673	4.67357
0.083	4.80879	4.68736
0.0831	4.73961	4.8236
0.0832	4.83798	4.74996
0.0833	4.63889	4.7253
0.0834	4.87996	4.78944
0.0835	4.71014	4.77329
0.0836	4.80289	4.75392
0.0837	4.81949	4.76866
0.0838	4.87514	4.80657
0.0839	4.75836	4.7173
0.084	4.69538	4.70793
0.0841	4.78362	4.75531
0.0842	4.82695	4.79953
0.0843	4.856	4.70325
0.0844	4.88184	4.74332
0.0845	4.78409	4.71852
0.0846	4.74895	4.71127
0.0847	4.71108	4.72525
0.0848	4.76933	4.78111
0.0849	4.75289	4.73161
0.085	4.80213	4.71567
0.0851	4.76471	4.66719
0.0852	4.75769	4.7
0.0853	4.88704	4.7207
0.0854	4.78941	4.68178
0.0855	4.82257	4.77916
0.0856	4.75347	4.76651
0.0857	4.85185	4.72652
0.0858	4.73142	4.7177
0.0859	4.8004	4.73128
0.086	4.76377	4.7041
0.0861	4.78203	4.71921
0.0862	4.87625	4.62003
0.0863	4.7686	4.74538
0.0864	4.89764	4.66281
0.0865	4.77101	4.6769
0.0866	4.64908	4.82723
0.0867	4.75238	4.79958
0.0868	4.75687	4.60954
0.0869	4.79038	4.75522
0.087	4.80545	4.75491
0.0871	4.72449	4.74803
0.0872	4.80173	4.73853
0.0873	4.86661	4.64642
0.0874	4.81406	4.7092
0.0875	4.84535	4.81061
0.0876	4.81685	4.78746
0.0877	4.80815	4.68393
0.0878	4.75449	4.85275
0.0879	4.84513	4.7982
0.088	4.75594	4.83216
0.0881	4.8629	4.96048
0.0882	4.68095	4.75182
0.0883	4.77454	4.74339
0.0884	4.75449	4.83963
0.0885	4.80905	4.83621
0.0886	4.78749	4.73212
0.0887	4.84633	4.84555
0.0888	4.8271	4.78024
0.0889	4.87322	4.69292
0.089	4.89574	4.74423
0.0891	4.8122	4.6592
0.0892	4.76209	4.77922
0.0893	4.84439	4.80708
0.0894	4.75601	4.81863
0.0895	4.7585	4.66138
0.0896	4.79971	4.78215
0.0897	4.81651	4.75325
0.0898	4.84383	4.74195
0.0899	4.82465	4.7139
0.09	4.85961	4.72891
0.0901	4.74526	4.75034
0.0902	4.77626	4.78859
0.0903	4.87891	4.80133
0.0904	4.87692	4.74191
0.0905	4.91527	4.79318
0.0906	4.81455	4.81758
0.0907	4.91115	4.78229
0.0908	4.89192	4.77536
0.0909	4.73567	4.76821
0.091	4.84377	4.80136
0.0911	4.84338	4.8588
0.0912	4.76586	4.71875
0.0913	4.83429	4.85459
0.0914	4.80533	4.84215
0.0915	4.76624	4.81705
0.0916	4.75876	4.79108
0.0917	4.82463	4.77899
0.0918	4.76438	4.78102
0.0919	4.75839	4.73044
0.092	4.70427	4.68726
0.0921	4.76753	4.7599
0.0922	4.85133	4.76277
0.0923	4.8376	4.79573
0.0924	4.84006	4.69975
0.0925	4.87422	4.72859
0.0926	4.77348	4.84744
0.0927	4.86591	4.73895
0.0928	4.74184	4.77449
0.0929	4.88878	4.77313
0.093	4.77756	4.6915
0.0931	4.81755	4.90901
0.0932	4.83814	4.82434
0.0933	4.847	4.74335
0.0934	4.86984	4.81572
0.0935	4.82947	4.85755
0.0936	4.85335	4.72281
0.0937	4.79563	4.76854
0.0938	4.88074	4.76378
0.0939	4.85779	4.87242
0.094	4.88222	4.76511
0.0941	4.83435	4.73471
0.0942	4.79616	4.79332
0.0943	4.8678	4.77124
0.0944	4.80823	4.77118
0.0945	4.73232	4.72922
0.0946	4.82747	4.72508
0.0947	4.6564	4.91974
0.0948	4.88269	4.80055
0.0949	4.87192	4.85304
0.095	4.74991	4.8062
0.0951	4.79886	4.8214
0.0952	4.78615	4.73236
0.0953	4.78365	4.82642
0.0954	4.69887	4.78626
0.0955	4.95186	4.81937
0.0956	4.85724	4.80861
0.0957	4.73958	4.79441
0.0958	4.86685	4.76404
0.0959	4.7157	4.79643
0.096	4.83366	4.73792
0.0961	4.84215	4.78644
0.0962	4.7836	4.77179
0.0963	4.96993	4.8214
0.0964	4.90051	4.7255
0.0965	4.7691	4.77356
0.0966	4.80464	4.78546
0.0967	4.72974	4.69853
0.0968	4.74483	4.77484
0.0969	4.89208	4.65599
0.097	4.83647	4.91591
0.0971	4.86601	4.80074
0.0972	4.94005	4.72124
0.0973	4.87177	4.72226
0.0974	4.85436	4.7321
0.0975	4.81996	4.7596
0.0976	4.82984	4.86626
0.0977	4.856	4.86748
0.0978	4.7816	4.79709
0.0979	4.85111	4.77211
0.098	4.85478	4.82999
0.0981	4.79048	4.75723
0.0982	4.76666	4.74301
0.0983	4.85347	4.71265
0.0984	4.87419	4.71889
0.0985	4.94434	4.77585
0.0986	4.91701	4.76087
0.0987	4.90164	4.7599
0.0988	4.88336	4.83897
0.0989	4.76293	4.76888
0.099	4.89322	4.64568
0.0991	4.84606	4.87004
0.0992	4.80772	4.73252
0.0993	4.81825	4.621
0.0994	4.81648	4.79633
0.0995	5.00636	4.77063
0.0996	4.85375	4.83713
0.0997	4.82582	4.83063
0.0998	4.87863	4.80565
0.0999	4.73551	4.77837
0.1	4.82341	4.79833
