# Supplementary material for: Kinetic regulation of kinesin’s two motor domains coordinates its stepping along microtubules
Source: eLife. 2025 Apr 17;14:RP106228. doi: 10.7554/eLife.106228 (PMC12005725; doi:10.7554/eLife.106228)
Supplement: Figure 4—source data 1. [file elife-106228-fig4-data1.xlsx]

## Sheet: K349 WT
Fig.2-suppl 2B
			Double exponential fit					Model:	a*exp(-b*x)+c*exp(-d*x)+e
	mant-dATP		[mant] (uM)	Obs Rate (1/s)	Second Rate (1/s)	Time window (s)	num traces	a param	b param	c param	d param	e param
	ex280	1	5	183.6	16.11	0.1	4	-1.664	183.6	0.3747	16.11	5.191
		2	10	210.4	20.95	0.1	3	-1.838	210.4	0.2759	20.95	5.818
		3	15	251.9	35.18	0.1	4	-1.728	251.9	0.3257	35.18	5.877
		4	20	287.5	25.67	0.1	4	-1.673	287.5	0.2945	25.67	5.889
		5	25	301.4	42.94	0.1	3	-1.619	301.4	0.3716	42.94	5.713
		6	30	335	43.94	0.1	4	-1.53	335	0.3292	43.94	6.061
		7	40	389.6	49.36	0.1	4	-1.396	389.6	0.3042	49.36	5.95
		8	50	397	61.3	0.1	4	-1.227	397	0.2879	61.3	5.773
								-1.58438	294.55	0.320462	36.9313	5.784
	Constrained d parameter		Double exponential fit					Model:	a*exp(-b*x)+c*exp(-d*x)+e		constrained
	mant-dATP		[mant] (uM)	Obs Rate (1/s)	Second Rate (1/s)	Time window (s)	num traces	a param	b param	c param	d param	e param
	ex280	1	5			0.1	4	-1.8035	164.986	0.4579	35	5.2685
	Constrained d parameter	2	10			0.1	3	-1.9072	198.858	0.3251	35	5.8521
	35s-1	3	15			0.1	4	-1.7273	252.093	0.3249	35	5.8768
	from Taylor and Ma	4	20			0.1	4	-1.7102	275.001	0.3226	35	5.9097
		5	25			0.1	3	-1.5811	315.059	0.3338	35	5.7028
		6	30			0.1	4	-1.4947	350.956	0.2945	35	6.0507
		7	40			0.1	4	-1.3506	419.53	0.2571	35	5.9367
		8	50			0.1	4	-1.1548	451.915	0.2083	35	5.7563
								-1.59118	303.55	0.315525	35	5.7942
			Single exponential fit				Model:	a*exp(-b*x)+c
	mant-ADP		[mant] (uM)	Obs Rate (1/s)	Time window (s)	num traces	a param	b param	c param
	ex280	1	2.5	148.4	0.1		-0.9659	148.4	5.095
		2	5	168.8	0.1		-1.202	168.8	5.308
		3	10	213.8	0.05		-1.282	213.8	5.253
		4	15	323.3	0.05		-1.02	323.3	5.316
		5	20	376.4	0.05		-0.7564	376.4	5.406
		6	25	483.1	0.05		-0.6861	483.1	5.407
		7	30	520.6	0.05		-0.5934	520.6	5.501
		8	40	683.5	0.05		-0.3305	683.5	5.43
							-0.854537	364.737	5.3395
					(kon)		(koff)
					p1	p1 (95% Conf)	p2	p2 (95% Conf)	Rsquare	Transient fit type
				WT + dATP	5.014	(3.992, 6.036)	172.3	(143.5, 201.2)	0.96	double exponential	5 parameter fit
				WT + dATP	6.588	5.774 to 7.401	143	120.0 to 165.9	0.985	double exponential	4 parameter fit
				E236A + dATP	5.639	(5.11, 6.167)	-0.6062	(-18.28, 17.07)	0.987	burst

## Sheet: K349 E236A
Fig.2-suppl 2B
				Burst fit				Model:	a*exp(-b*x)+c*x+d
	mant-dATP		[mant] (uM)	Obs Rate (1/s)	Linear rate (1/s)	Time window (s)	num traces	a param	b param	c param	d param
	ex280	1	5	24.45	2.274	0.25	2	-3.168	24.45	2.274	4.895
		2	10	57.16	4.06	0.1	2	-2.821	57.16	4.06	5.188
		3	15	76.65	2.63	0.1	3	-2.494	76.65	2.63	2.63
		4	20	118.7	5.42	0.05	3	-2.112	118.7	5.42	4.975
		5	25	123.2	2.765	0.05	2	-2.153	123.2	2.765	5.175
		6	30	185	14.63	0.02	3	-1.666	185	14.63	4.759
		7	35	195.4	6.052	0.02	3	-1.53	195.4	6.052	5.274
		8	40	235.1	6.75	0.02	3	-1.294	235.1	6.75	5.208
		9	50	292.3	7.102	0.02	3	-1.101	292.3	7.102	5.202
		10	60	321.2	6.231	0.02	4	-1.038	321.2	6.231	5.06
								-1.9377	162.916	5.7914	4.8366
				Burst fit				Model:	a*exp(-b*x)+c*x+d
	mant-ADP		[mant] (uM)	Obs Rate (1/s)	Linear rate (1/s)	Time window (s)	num traces	a param	b param	c param	d param
	ex280	1	5	98.6	1.755	0.1	3	-1.835	98.6	1.755	5.142
		2	10	147.7	1.422	0.1	3	-1.535	147.7	1.422	5.716
		3	15	164.6	1.506	0.05	4	-1.311	164.6	1.506	5.351
		4	20	216.2	1.189	0.05	3	-0.8929	216.2	1.189	5.14
		5	25	259.6	0.8316	0.05	4	-0.7453	259.6	0.8316	5.406
		6	30	307.9	0.8112	0.05	3	-0.9132	307.9	0.8112	5.39
		7	35	351.4	1.342	0.05	3	-0.9103	351.4	1.342	5.352
		8	40	381.5	1.064	0.05	3	-0.953	381.5	1.064	5.348
		9	50	462.1	0.8742	0.05	5	-0.8868	462.1	0.8742	5.486
		10	60	529	1.236	0.05	4	-0.4514	529	1.236	5.568
								-1.04339	291.86	1.2031	5.3899
					(kon)		(koff)
					p1	p1 (95% Conf)	p2	p2 (95% Conf)	Rsquare	Transient fit type
				WT + ADP	14.61	(13.32, 15.89)	95.45	(67.09, 123.8)	0.9923	single exponential
				E236A + ADP	7.977	(7.589, 8.364)	60.54	(47.56, 73.52)	0.9965	burst

## Sheet: G0 HETERODIMER
Fig.4B
GO FRONT HEAD				Burst fit				Model:	a*exp(-b*x)+c*x+d
	mant-dATP		[mant] (uM)	Obs Rate (1/s)	Linear rate (1/s)	Time window (s)	num traces	a param	b param	c param	d param
	ex280	1	10	135	1.545	0.1	3	-0.511	135	1.545	5.225
		2	15	157.3	1.381	0.1	3	-0.5172	157.3	1.381	5.231
		3	20	204.7	1.14	0.05	3	-0.5101	204.7	1.14	5.379
		4	25	264	2.246	0.05	2	-0.5072	264	2.246	5.229
		5	30	250.5	1.719	0.05	3	-0.3763	250.5	1.719	5.163
		6	40	281	1.758	0.04	2	-0.382	281	1.758	4.258
		7	50	375.1	1.791	0.05	2	-0.3446	375.1	1.791	5.523
		8	60	403.7	1.252	0.02	5	-0.3029	403.7	1.252	5.286
								-0.431413	258.912	1.604	5.16175
GO REAR HEAD				Burst fit				Model:	a*exp(-b*x)+c*x+d
	mant-dATP		[mant] (uM)	Obs Rate (1/s)	Linear rate (1/s)	Time window (s)	num traces	a param	b param	c param	d param
	ex280	1	5	16.67	0.7772	0.5	2	-0.9878	16.67	0.7772	3.76
		2	7	20.96	0.8675	0.5	2	-1.057	20.96	0.8675	4.349
		3	10	32.89	1.774	0.25	2	-0.9827	32.89	1.774	4.508
		4	15	65.61	4.088	0.1	2	-0.7839	65.61	4.088	4.423
		5	20	85.91	3.337	0.1	2	-0.7035	85.91	3.337	4.59
		6	25	117.3	3.238	0.1	2	-0.5867	117.3	3.238	4.756
		7	30	136.2	4.249	0.05	3	-0.4788	136.2	4.249	4.408
		8	40	174.3	3.85	0.05	2	-0.4092	174.3	3.85	4.744
		9	50	202.9	3.816	0.05	2	-0.3766	202.9	3.816	4.905
					p1	p1 (95% Conf)	p2	p2 (95% Conf)	Rsquare	Transient fit type
				Front head heterodimer	5.337	(4.196, 6.477)	92.14	(51.91, 132.4)	0.9562	burst
				Rear head heterodimer	4.369	(3.921, 4.816)	-3.301	(-15.25, 8.644)	0.9871	burst
