# Supplementary material for: Kinetic regulation of kinesin’s two motor domains coordinates its stepping along microtubules
Source: eLife. 2025 Apr 17;14:RP106228. doi: 10.7554/eLife.106228 (PMC12005725; doi:10.7554/eLife.106228)
Supplement: Figure 5—figure supplement 2—source data 1. [file elife-106228-fig5-figsupp2-data1.xlsx]

## Sheet: Unbound
Unbound dwell time (ms)			Fig.5-suppl 2B
G0
state1	Nmolecule	Nstep	invtau	invtau_error	tau	tau_error
5	5	22	1.2011	0.0915	0.83257	0.0634253		1.05886	0.04643
10	8	35	0.72043	0.0769	1.38806	0.148164
20	4	35	1.5796	0.147	0.633072	0.0589146
50	3	41	1.2715	0.0831	0.786473	0.0514006
200	4	57	0.75128	0.0766	1.33106	0.135714
1000	7	93	0.72362	0.0862	1.38194	0.164621
state2
5	5	22	0.11164	0.0433	8.95736	3.47415		5.57258	0.637997
10	8	35	0.19342	0.0377	5.1701	1.00772
20	4	35	0.19713	0.0245	5.07279	0.630465
50	3	41	0.25001	0.018	3.99984	0.287977
200	4	57	0.22433	0.0384	4.45772	0.763056
1000	7	93	0.17308	0.0213	5.77768	0.711027
state3
5	5	22	0.061493	0.0107	16.262	2.82965
10	8	35	0.045868	0.00751	21.8017	3.56961
20	4	35	0.079383	0.00714	12.5972	1.13303
50	3	41	0.083801	0.00903	11.933	1.28585
200	4	57	0.095611	0.00763	10.459	0.834658
1000	7	93	0.16199	0.0123	6.17322	0.468736
totaｌ
5	5	22	0.02895	0.00318	34.5423	3.79429		0.099632	0.00247	10.0369	0.248828
10	8	35	0.039265	0.00645	25.468	4.18358		0.16661	0.00134	6.00204	0.0482728
20	4	35	0.060558	0.00448	16.5131	1.22162
50	3	41	0.06437	0.00627	15.5352	1.51321
200	4	57	0.061862	0.0039	16.165	1.0191
1000	7	93	0.092196	0.00722	10.8465	0.849402
kcat	79.677	7.36
KM	9.1495	3.72
1/kcat[ms]	12.5507	1.15934
kcat/KM	8.70834	3.63087
G7
ATPconc	Nmolecule	Nstep	invtau	invtau_error	tau	tau_error
5	7	126	0.16349	0.0135	6.11658	0.50507
10	13	403	0.19973	0.0133	5.00676	0.3334
20	8	104	0.26223	0.0121	3.81345	0.175963
50	16	401	0.32027	0.0267	3.12237	0.260303
200	6	210	0.20136	0.0106	4.96623	0.261432
1000	13	286	0.21184	0.0214	4.72054	0.476868
ave					4.32587
G12
ATPconc	Nmolecule	Nstep	invtau	invtau_error	tau	tau_error
1	5	39	0.12911	0.0101	7.74533	0.605901
2	3	21	0.13706	0.0136	7.29607	0.723965
5	10	131	0.078829	0.00581	12.6857	0.934984
10	17	434	0.10457	0.00654	9.56297	0.598086		5.00676	0.3334
20	7	157	0.22464	0.0102	4.45157	0.202128		5.11143	0.34226
50	16	323	0.14474	0.00594	6.90894	0.283537
1000	10	379	0.19124	0.0132	5.22903	0.360925		2.99437	0.22864
ave					7.69709
