# Supplementary material for: Kinetic regulation of kinesin’s two motor domains coordinates its stepping along microtubules
Source: eLife. 2025 Apr 17;14:RP106228. doi: 10.7554/eLife.106228 (PMC12005725; doi:10.7554/eLife.106228)
Supplement: Figure 5—figure supplement 2—source data 2. [file elife-106228-fig5-figsupp2-data2.xlsx]

## Sheet: Sheet1
2D histogram	E236A-WT	1mM ATP	Fig.5-suppl 2C
bound on-axis	bound off-axis		state1-on	state1-off		state2-on	state2-off		state3-on	state3-off
0.910845	-7.99061		-11.6674	-11.7345		-5.97238	-15.5325		-12.3674	3.73002
-0.847932	3.65095		-13.611	-21.7862		-9.92202	7.72261		-8.70187	-9.40869
-4.62013	5.31017		-6.10579	-7.80536		-12.3995	7.50749		-5.52399	-19.2845
-0.798506	11.9564		-2.87493	-18.9575		-15.1581	16.013		-7.79304	-13.7076
-1.90968	12.2703		-2.37639	5.80449		-15.2998	17.9267		-5.7216	-7.46532
-2.87607	10.4407		0.882393	-15.9277		-14.7558	17.0856		-3.64805	-27.3778
0.566244	9.70319		-1.43522	-29.4467		-13.7457	11.388		-3.54034	-28.2038
-2.16333	2.73015		2.29768	-13.0184		-16.7523	8.04147		0.40433	-24.7833
0.0192572	1.43484		2.67178	-11.0414		-15.8427	8.4016		-0.319211	-28.5159
4.64958	1.65153		-8.00791	-20.9885		-15.7195	11.6115		2.78493	-20.9252
2.59168	3.16256		-2.8473	-34.6064		-15.2328	12.684		-2.38517	2.89898
7.56614	1.70171		-6.39965	-31.2817		-14.6807	12.0076		2.75227	-10.5999
5.91209	2.97866		-6.70488	-28.5767		-13.1703	11.7675		-0.287773	3.70829
4.24709	4.30381		1.40815	-36.942		-15.5885	10.6282		-1.27249	9.68478
1.85946	3.36541		-4.59988	-35.6039		-14.7375	2.35241		1.42854	0.697513
3.36605	6.10421		-7.15728	-33.9001		-11.8364	2.08416		1.01027	2.18821
4.089	-0.471922		-1.00273	-36.9407		-12.6796	9.87584		4.44366	-12.9274
5.20581	3.38909		2.76444	-18.1286		-12.1136	-0.655972		1.64441	-2.60542
5.59109	-0.610212		-2.53483	-22.5432		-11.4256	-0.697533		-0.697483	4.92253
1.42481	1.04259		-8.87839	-22.263		-10.3314	-0.971468		0.85339	4.90472
-4.67947	-0.810966		-9.15308	-13.5454		-11.5105	1.18647		-0.875078	-1.51493
-4.56476	4.29203		-3.41243	-23.4849		-7.82562	-6.48351		0.714832	-4.95977
2.99252	1.27354		-8.37824	-24.3633		-10.0458	-8.54173		0.653818	1.69443
1.19197	0.541253		-14.5639	-29.3517		-13.741	6.06089		-3.71687	7.30058
1.8441	-0.353031		0.553954	-29.1918		-13.1383	1.24652		-0.324534	5.00887
-3.91566	4.49144		-14.4593	-16.2382		-15.8772	8.53088		-1.94115	12.3689
-3.13247	3.18551		-0.574944	-28.425		-14.6162	9.83217		-1.19208	-4.60686
-0.604832	3.01192		-3.02012	-20.505		-13.9512	6.28681		0.207967	-5.35864
-1.17777	4.19885		4.16129	-28.4021		-16.2252	12.0355		-1.17255	-9.75937
-0.64584	11.3385		-0.333419	-22.6003		-16.7948	11.1651		2.65084	-10.1386
0.978677	3.8827		-13.0928	6.32464		-15.1308	12.8259		1.78908	-8.3914
0.9996	2.17132		-9.39746	-3.94453		-15.5395	7.29443		0.366938	-3.53689
-2.1805	-0.788323		3.34238	-25.7043		-12.5898	10.057		3.04517	-5.59538
-4.63278	0.316755		1.96169	-6.49412		-10.6412	5.80449		4.52143	-11.9089
-0.650195	2.71373		-8.95794	-10.8559		-14.3305	11.0183		-3.72972	9.43305
0.933065	4.78768		-15.1118	-13.5975		-15.071	7.73026		1.23196	-9.43126
-0.100297	7.63381		-5.47687	-13.3207		-13.2605	8.20623		-5.78509	3.66361
-1.60679	3.16701		-2.62799	-25.4169		-10.4965	4.5476		-1.90572	0.553379
-0.737932	1.57164		-3.97809	-19.2639		-5.18131	-16.4387		2.42927	-24.5465
0.280989	5.24531		-7.48192	-3.85521		-13.2444	0.84304		-1.71219	-4.56772
1.00895	4.21408		1.07908	-8.14218		-16.2864	5.77851		0.261868	-7.23803
2.13549	6.78648		-7.75512	0.959842		-15.2841	8.84514		0.933193	-20.2682
3.61457	6.78808		3.25836	-18.9109		-14.2295	12.1242		-0.775027	-9.39123
1.86636	-4.67828		-5.65673	-8.15258		-13.1382	8.97815		3.22206	-11.8739
4.77767	-6.41287		-7.38552	-1.80227		-16.5663	12.5414		0.0218336	6.20316
4.38344	0.668201		-8.90999	2.02442		-15.0837	7.82426		4.33054	-2.98573
2.11645	-2.5314		-9.10253	-7.30985		-11.3051	11.6322		1.97823	9.21126
3.58608	-0.600405		-6.35735	-24.4252		-11.7775	9.59548		5.47587	-15.3713
7.31851	-1.14675		-0.788927	5.44772		-11.5125	12.9095		0.531145	12.8677
6.1815	0.120598		-3.97365	-5.85176		-12.6696	12.7757		0.909318	-6.31677
6.55431	-2.85564		-3.49332	-2.93021		-13.8043	11.3832		-0.53016	1.65342
3.73291	4.47909		-5.45807	-8.81927		-16.007	13.8479		-2.19117	6.11107
3.44673	10.3546		-0.150204	2.44045		-12.8931	11.0227		0.394962	-12.4924
1.67965	7.66134		-3.49845	-9.2242		-12.9905	10.7729		-0.252283	2.27261
0.337216	2.57878		-0.697634	-3.27083		-13.7494	10.2626		-0.909299	-8.88997
-0.0868142	0.108414		0.192465	-5.12477		-7.11409	-9.81961		1.95936	-2.0507
2.21406	-4.00457		-5.57505	-25.3592		-9.87653	6.25855		-1.34368	-1.24109
-3.61391	-1.43911		5.58127	-9.67081		-10.1928	6.06131		3.0012	-23.4957
-0.612979	-1.68732		4.15741	-17.4716		-13.7714	14.212		1.24709	-7.493
2.91382	5.73223		9.33463	-9.93819		-15.0406	11.2571		-0.132913	-8.91425
3.15814	3.25226		4.94054	-17.3707		-14.9032	13.8686		-2.83049	6.84891
-0.210401	-2.50975		-1.11348	-24.9033		-12.9324	8.9053		-1.9027	-3.92852
-6.07807	2.27505		-10.924	-26.1432		-16.3856	13.3717		-0.208259	-2.77954
-2.77185	2.13828		-3.26176	-8.18177		-13.2761	13.59		-4.72664	7.05158
-1.9696	12.02		-3.74327	-12.1821		-16.1074	14.8423		-2.54523	-9.42935
-0.103608	-2.35817		-5.85011	-1.75653		-15.3962	13.9296		-2.26397	11.0154
-1.63407	8.08873		0.647384	-16.0261		-17.4788	14.6036		-1.23076	3.07713
-3.48701	9.61828		-2.17665	-20.9649		-15.8755	11.7129		-2.06197	-1.40733
0.00181497	8.94823		-1.52246	-9.2909		-16.2511	13.4575		0.166583	-1.86016
-1.83369	6.1413		-1.21695	-19.727		-18.0455	13.5368		1.59453	-36.5924
0.619924	4.47719		-4.44302	-18.2		-13.8599	11.9809		-0.306515	-23.7785
-0.716703	7.07997		-3.2516	-19.7618		-15.1836	10.0129		1.63383	-35.2624
1.38527	7.96925		-4.10792	-27.388		-12.3424	12.0784		-4.36755	-43.397
-0.704278	9.82432		1.51725	-27.5355		-12.2226	14.0073		-0.914142	-20.9577
-1.73951	5.71205		-6.35019	-14.0622		-12.6227	14.567		0.366811	-13.4522
1.04628	5.69165		-1.25847	-30.9329		-14.6469	11.7202		-0.25149	-1.7202
0.827742	4.56801		-4.9487	-19.4042		-14.4419	12.352		-0.568249	4.13488
0.549973	12.1862		3.00777	-28.2325		-14.3619	6.85447		0.043415	1.76503
0.215292	1.97061		2.3626	-24.4073		-15.0144	9.05615		3.22352	-10.5027
-2.45192	3.0202		-3.49791	-15.5268		-12.0353	10.0988		2.11144	4.82819
1.27341	1.1325		-1.1536	-15.9211		-13.0537	8.55974		4.94063	2.31557
1.3848	0.812166		0.0403859	8.43851		-12.1113	9.90399		-0.0272124	15.5414
0.366859	7.78489		-2.19844	-2.98821		-10.3807	8.38115		1.55695	-10.531
-1.38901	4.62648		0.651903	-1.50155		-13.6608	10.3708		-1.99547	-11.2547
-1.68453	2.32703		4.77961	-4.08421		-14.6569	4.80707		5.02806	-33.4875
-0.94979	-3.43123		-0.410394	-13.1681		-17.367	9.97688		-13.8892	11.0565
0.464069	-1.89396		5.19816	10.3179		-16.4461	12.8852		-5.30172	-14.5262
-1.45027	-3.39027		10.5848	-14.6501		-15.8798	10.2681		-6.00155	-19.9836
1.38552	2.16807		4.38092	-29.0326		-14.0189	12.6278		-7.70739	-18.4673
0.0723506	-1.61905		-0.661639	-33.3209		-14.1534	10.4415		-1.90433	-34.0248
0.77181	0.764897		-1.82787	-26.2982		-16.4466	12.1999		-3.5297	-34.9204
2.57001	-2.62885		-9.14747	-36.005		-17.1927	8.42796		-4.56228	-36.9595
2.43125	2.09923		-8.68537	-25.2281		-15.6525	7.6482		-0.18897	-4.86269
1.44537	2.27116		-12.691	-11.7535		-14.7347	6.52542		-1.78125	-37.313
4.88818	5.82018		-15.9711	-8.98935		-16.363	11.2286		-2.3377	-25.7057
6.0429	3.59764		-1.97818	-9.47493		-17.074	12.0501		-3.35398	-1.98086
3.75586	-1.2547		-4.97042	-22.0921		-15.1178	14.3817		-2.40465	-10.7186
2.10511	3.25341		-4.37172	-17.823		-16.0932	12.9748		-3.30618	-16.9338
0.902583	-3.40497		-2.60615	-22.3387		-11.5647	12.868		-2.78607	-13.0318
-5.06395	-1.65501		-1.91496	-16.4129		-13.3199	11.7772		0.479353	-30.4862
-4.95666	3.04851		-4.69942	-21.1851		-10.4336	4.61998		-6.6501	-19.861
-3.62481	5.85055		-9.40649	-5.2585		-14.7096	10.0403		-4.84776	-21.8208
-8.55605	4.7554		-9.38782	-10.3791		-16.5302	13.6025		-7.15468	-15.7199
-2.04	3.87544		6.54691	-4.06643		-14.8985	7.78076		-0.390911	-40.135
-2.58123	-1.75349		-4.14993	-7.06453		-13.5056	12.2709		-1.3245	-36.2641
-3.17678	1.76497		-6.80321	-8.66052		-13.0732	8.13387		-3.55762	-39.2597
-1.95977	4.47079		1.08549	-1.8114		-10.803	12.0476		-1.84157	-34.9182
-0.482784	0.225519		4.16126	-0.521949		-13.1877	14.8702		0.135716	-9.02
-2.77437	5.87886		-3.62123	5.52753		-15.8781	14.0288		-1.06764	-6.95003
1.72743	-1.03829		-2.77819	3.13785		-16.2983	13.9447		1.994	-23.5313
-0.598552	8.11023		-1.35816	5.87484		-12.3202	15.2439		3.41724	-44.0348
0.639467	8.97569		-5.21122	-10.8772		-15.159	17.2393		-4.04002	1.25459
2.88125	7.79998		-2.80924	-9.7926		-14.1115	14.5099		1.28899	-1.70561
3.83874	8.7918		-6.19675	-12.7078		-16.1876	13.4587		-0.0670605	-8.95257
7.616	3.47889		-8.078	-6.08477		-13.5842	13.3929		0.261101	-2.19104
3.36718	5.82854		-4.69003	-8.13714		-14.7764	16.3542		1.57076	-0.0208622
7.25264	3.38504		-4.58972	-9.40324		-14.267	12.9034		1.07757	8.86999
5.83407	3.84226		-0.844941	-8.2529		-15.2231	17.2958		1.06908	7.80778
2.75289	7.99773		-1.55917	-3.41846		-11.6984	16.962		3.49409	4.49156
-1.99392	1.87043		-8.24055	-3.60555		-11.1972	15.3429		2.29846	-12.4795
2.01919	7.76231		-7.68126	-14.5089		-13.616	13.9326		0.703663	7.57975
6.90573	6.68626		-1.80744	-6.35116		-12.7943	11.157		1.9249	7.68909
3.96058	3.2086		-4.9489	4.48437		-12.9901	11.0415		1.10709	5.9758
0.473517	5.96289		-2.98576	6.21789		-16.0535	16.3561		4.13019	-9.24419
1.50144	9.58602		-2.07723	3.44962		-18.2817	14.4154		5.25392	-20.337
3.16989	6.11137		2.07567	1.98438		-13.7545	16.4241		5.73413	-27.7126
-1.28021	4.55126		-3.19984	5.92486		-15.6681	10.6517		2.49754	-30.0493
5.42408	-3.72698		-2.7328	6.05246		-13.449	13.4219		3.80598	-13.5905
5.23089	-2.14719		-5.15928	-0.767882		-16.7458	13.32		2.16683	-1.77864
4.99521	3.32573		-2.96829	1.94594		-15.2162	9.30782		1.4917	9.18382
2.78217	1.91439		5.23141	-10.4721		-17.2204	12.6655		3.80344	-6.87662
-2.34406	6.60696		-5.87401	-20.1178		-15.9066	13.2438		3.99007	2.26694
1.95823	1.76349		-2.46506	-31.0071		-16.6942	10.3931		3.75105	-5.43696
4.53323	2.09343		-6.68691	-23.8195		-14.3826	9.66385		0.307208	-6.19006
4.58811	5.84116		-2.69311	-21.0606		-15.3625	7.99027		4.69812	-15.1986
3.7837	1.80735		-0.956197	-17.9574		-14.1538	3.66799		-0.641318	-2.36103
5.7091	4.02114		-6.391	-4.28032		-16.0571	3.38596		-1.22003	4.18597
6.0666	8.2886		-17.4485	-6.88111		-14.491	0.993487		2.13486	-23.8441
4.00509	6.93495		-17.448	9.07238		-12.0267	-0.246683		-2.16921	-29.7381
3.11749	10.9652		-19.4244	10.4857		-13.0517	2.8194		-3.70029	-12.1061
5.05047	3.62473		-15.5422	8.24647		-14.6284	1.87493		-3.07699	-6.54402
8.20562	4.83541		-15.6934	4.80467		-13.8096	-4.97263		-2.55321	-10.4149
6.27217	3.52135		-15.69	9.23073		-12.5355	-2.07744		-2.5188	-13.8965
6.68464	11.3505		-12.2008	6.23717		-9.56003	-6.69131		-3.04369	-32.3706
5.25426	1.65722		-12.3232	5.80827		-10.7328	-1.44415		-2.65843	-33.0169
3.50553	5.18269		-17.0274	4.27434		-9.35795	-3.36253		-5.88975	-28.9683
3.04289	2.75517		-19.8504	1.28444		-6.98517	-4.09837		-4.7724	-28.016
2.50643	1.29578		-13.7246	8.20818		-9.03639	-0.565307		-7.29758	-18.0849
2.70069	1.88668		-8.84139	6.21834		-13.5632	11.4912		-9.22265	-22.6462
2.59385	1.65954		-11.7931	0.607747		-12.0808	5.35506		-6.73295	-34.1062
5.68317	-0.225766		-14.4843	9.35791		-12.8346	-0.837396		-0.96778	-44.3407
2.2816	-0.387131		-18.6314	1.95547		-12.641	11.7752		0.616363	-43.1073
1.9665	-0.660702		-15.8081	-0.85073		-7.42852	5.34337		-5.67902	-28.985
-0.799973	3.86579		-17.4046	2.91521		-9.46685	4.81967		-3.87146	-21.3775
0.657683	-0.0394466		-19.2748	-4.205		-8.75747	9.67013		-2.06634	-13.5688
3.26971	6.71443		-12.8827	-4.68813		-7.70259	7.87991		-3.56446	-20.6221
2.97861	5.25827		-16.018	-9.14516		-10.6876	11.0254		-11.3757	4.37816
3.5442	6.82117		-18.2204	-13.1297		-8.48293	7.92106		-5.88247	-28.1904
3.06147	5.66033		-8.62581	-4.13574		-11.652	8.44039		-7.47379	-12.6414
-0.367674	2.63788		-17.2179	-2.56049		-11.3888	0.920249		-7.19939	-23.0074
-0.965316	6.01269		-9.71622	-2.57338		-8.14481	-13.694		-3.30013	-36.1093
-2.38343	2.8459		-6.42051	-19.5594		-14.754	2.60745		-2.38473	-32.7746
-0.173532	8.54261		-7.4314	-4.81265		0.156065	-39.6548		-1.18288	-39.1844
-1.15763	9.02043		0.205529	-23.8378		-11.4475	-4.97824		-4.46813	-31.1369
4.38653	14.0704		-6.04998	-29.537		-13.6311	4.90306		-6.54292	-2.78252
-0.705311	2.53975		-7.81401	-27.676		-17.4322	3.70227		-7.60295	0.452699
3.88513	3.76804		-10.7093	-4.07429		-13.5457	2.15322		-5.23404	-22.23
1.63347	12.4428		-10.4565	3.41768		-18.5591	9.37065		-2.89258	-29.8474
-0.0335694	10.6406		-10.4359	-6.39319		-17.0408	8.63751		-5.52631	-3.25582
-1.12967	3.25508		-11.2589	-15.092		-21.1765	6.40949		-2.30174	-36.3055
-1.21319	5.98345		-6.17141	-3.59773		-20.8568	12.6469		-0.989981	-25.1952
3.93261	1.49008		1.61031	3.72292		-19.1516	9.73728		-5.04061	-36.7895
0.235047	1.90749		1.22743	8.72915		-18.3039	5.72816		-5.14246	-37.4092
-3.10545	-0.314228		-0.0955208	2.48412		-14.5347	2.96162		-5.53299	-28.2071
0.857629	2.33558		2.67755	5.9836		-16.8643	9.1417		-4.77025	-24.9333
-5.04609	2.95845		-2.41359	4.49939		-13.2501	1.00726		0.843551	-36.9497
-1.5928	1.22642		3.36484	-11.1644		-17.0678	6.47746		-3.6157	-27.3591
-1.80651	4.52481		-2.76291	-6.27169		-15.6312	5.33022		-3.37369	-19.9722
-2.91465	2.08006		-6.42287	-5.46289		-18.0778	6.81951		-1.87711	-14.8332
2.19698	2.39382		-5.84697	-19.3475		-16.049	3.10839		1.01508	0.785098
0.642547	3.27075		-8.03827	3.13788		-12.5862	5.27595		0.85012	5.34595
6.99592	-4.52578		-12.1792	6.29319		-14.914	7.87152		-1.29586	7.12833
3.08407	-2.79572		-15.9735	-1.80074		-14.4627	4.81997		-1.76828	12.2165
1.5484	2.84015		-11.1056	-31.9786		-14.2673	5.11795		1.35349	2.37106
5.64139	0.996085		-4.47063	-13.9338		-14.3961	5.49454		2.49652	2.83311
3.59474	6.37488		-10.3633	-4.99495		-14.1517	8.1424		1.34437	-0.343422
0.1936	0.295263		-5.18089	-6.48126		-14.6777	4.34352		1.86573	-11.7923
0.983715	-0.40938		-14.6248	4.34199		-14.5358	6.54843		0.921661	2.3027
-0.916542	0.137943		-16.416	-5.05526		-12.0783	4.68478		0.222034	11.9008
1.88482	-1.11457		-13.2784	-10.5588		-14.6813	2.9237		1.68681	-2.10451
-2.98367	2.17326		-7.27838	-11.8928		-16.0863	1.25505		2.46181	-12.4461
2.14723	0.52015		-13.1344	-5.56769		-16.9041	5.33811		1.5161	6.11725
3.93297	6.61635		-5.98838	-18.9405		-15.2449	4.68233		0.380161	6.41716
-1.90941	6.03915		-8.16554	7.02539		-17.6568	3.85856		3.36364	-6.88404
-0.9987	-0.0334133		-6.81118	7.73191		-19.5254	3.05413		-0.630253	5.02584
-1.20525	1.33664		0.37639	-5.01059		-19.7206	8.13174		-2.34487	-3.55843
-2.47512	1.24226		0.758384	-14.8316		-21.522	6.18085		-1.83195	-15.8796
-2.76792	7.95413		-1.9364	-15.8752		-16.0553	3.93165		1.60193	-28.8887
-0.802163	6.34494		1.04007	-18.0247		-17.2001	6.34671		1.28772	-37.7242
3.38521	3.50016		-1.56702	-18.0904		-17.2757	4.90604		1.79024	-32.8873
3.95191	0.17068		4.45662	-27.252		-19.3901	7.97549		-12.5331	-1.68408
0.249458	0.239127		5.69936	-11.1794		-19.8596	8.28777		-8.60277	-7.53737
3.05595	1.89654		-1.96692	-12.5111		-21.458	9.44418		-6.82529	-22.1787
4.32293	-0.230827		-5.04308	-11.1092		-15.0533	-0.0361147		-4.73305	-36.1502
2.57928	2.01286		-5.68011	-4.20701		-20.1205	9.42688		-4.31446	-40.8776
2.14883	0.0349254		-2.06243	-11.396		-16.4551	11.6368		0.945396	-12.6815
0.125909	3.02938		-9.20562	-5.03341		-18.5165	5.93819		1.96726	-11.6733
-3.24731	-1.0255		0.629534	7.99452		-14.9797	8.40943		1.38315	-15.2435
-3.85537	4.01135		2.41896	5.58108		-15.5604	12.7161		3.20033	-13.3032
-4.18034	0.36886		-0.369733	-3.21228		-15.2473	7.40284		2.357	-26.3417
-2.23525	1.5033		-4.79824	1.46024		-14.9846	5.80369		0.633061	-4.19519
-0.406748	-0.471129		-3.89945	-0.144047		-17.8273	1.83097		1.18219	-8.6324
2.76233	-6.90301		0.528934	-13.2442		-16.7049	9.24603		2.47045	-4.23251
1.63423	-2.47706		-5.86164	-31.1932		-17.4037	10.7841		-2.52991	3.93682
5.03609	-2.58178		-13.4882	-23.5828		-13.6871	6.6059		0.402398	-5.5482
-1.42206	-4.11877		-9.71609	-17.4835		-8.42021	-22.8505		0.689668	-7.17776
1.21798	-0.970431		-20.4919	-8.97845		-14.4115	9.28311		-1.68545	8.4418
4.57841	-1.28693		-8.90608	-31.3056		-11.4888	9.33693		-2.02239	9.42451
6.27738	1.22104		-3.91653	-25.7779		-12.1773	11.3704		2.26308	3.29493
-1.49999	-1.7974		-11.8454	-29.4553		-16.0998	13.6006		-0.405131	7.94056
3.61365	3.45873		-10.9824	-25.9904		-17.1208	13.2682		-1.88178	3.713
1.10301	-2.49727		2.62654	-23.1551		-16.6811	9.55681		2.336	-2.73568
4.40329	-5.25219		-7.30995	-4.20511		-14.412	13.4466		-3.19125	13.5743
1.13217	-0.690593		-10.6557	-7.03656		-17.5561	9.96632		0.818403	-3.26101
3.93762	-1.77953		-11.1428	-17.9935		-15.0251	11.8058		-2.23472	6.79211
1.62964	-3.81602		-3.02728	-19.4139		-13.8808	4.08933		-0.0118889	-0.355106
0.301476	2.03511		0.777301	-23.9004		-16.2168	11.3201		0.223716	-10.4853
2.25022	0.046208		-4.22448	-19.3736		-17.7335	8.70925		-3.1943	-0.837662
-2.16238	-2.72126		-7.79874	-18.0532		-14.8187	8.69686		0.603751	-6.08857
0.732044	-3.04618		-6.41395	-15.562		-13.18	10.554		0.74725	-34.1735
3.38853	2.42362		1.04499	-6.35384		-12.6006	10.5476		1.02194	-20.1133
5.43186	-4.64817		-9.13701	-2.3396		-14.1852	11.349		-0.70152	-17.2565
-0.302757	3.04072		-11.2486	-3.49049		-14.2814	7.32521		3.99249	-22.8753
2.35606	4.12038		-2.0414	-17.3549		-13.8691	9.66401		1.34662	-23.9585
1.66346	1.92877		-6.64126	-5.16225		-15.3665	14.7173		-0.395012	-1.08357
1.06585	-0.12178		-3.49265	-16.2584		-13.6626	12.1423		-1.18359	-17.5738
1.50987	4.2716		-4.64071	3.74881		-16.6767	9.76456		0.772581	7.36722
-2.14006	4.47383		2.10627	-0.664465		-14.7632	6.82285		-0.383818	7.89844
-0.714607	3.75183		6.29295	-12.4904		-13.7198	8.52583		1.33028	0.0487215
2.14175	3.07749		-1.73774	-27.9445		-13.8555	8.19367		0.322004	10.0596
2.41847	-3.15566		-5.03759	-19.9413		-12.1583	11.1825		1.06927	-7.08237
1.51709	-2.05937		-3.23226	-5.46037		-14.3749	14.6462		0.700397	10.4572
-1.88943	1.53518		1.51331	-22.4779		-14.9521	13.3264		-4.63777	7.76319
-3.88959	0.414512		-6.12576	-23.7036		-13.0572	16.5004		-1.34073	2.10597
-4.57329	-6.56863		-9.82476	-18.8935		-14.2001	9.95975		0.851359	4.45549
0.65769	-1.98977		0.735425	-18.3731		-17.0149	10.9022		0.641255	-1.92514
1.62197	0.743565		-11.4137	-6.11409		-16.6153	12.1607		2.49716	-7.9118
1.68954	3.25219		2.85025	-20.5801		-15.4884	7.42006		2.40469	-3.05422
3.77319	4.20731		-5.87626	-12.0781		-14.4947	11.5911		3.68551	-12.7028
-1.37941	3.66388		1.87326	-15.6034		-12.4226	11.0806		1.3869	-10.5848
-0.251572	-2.56472		-4.75708	-19.9193		-15.399	10.6959		0.819836	2.04772
3.32021	-1.41848		-2.79169	-14.5851		-15.7876	10.3718		1.35126	2.48372
2.93874	4.06408		-3.61448	-23.7918		-17.1557	11.5993		2.98995	3.163
5.36595	-3.48242		-10.9671	-7.66383		-14.3325	12.6071		0.551891	-6.03024
1.459	0.0996092		-13.6226	-4.77084		-12.7168	13.7871		1.68665	-13.1635
1.32847	-1.3153		1.13786	0.451908		-15.1901	12.1456		2.82306	-26.3166
-2.52478	-0.701344		-2.33569	0.0580272		-15.2426	10.0907		4.66286	-8.74036
-1.05895	-2.6671		0.465104	-5.25159		-17.022	11.2089		1.59288	-10.1028
1.93946	1.31172		-1.87428	7.43889		-17.3067	10.0794		-11.6044	4.46241
2.01681	2.28416		-3.28741	-6.96547		-16.1454	12.3374		-4.44002	-7.18347
0.597207	3.90121		-3.46731	-18.5104		-14.8604	13.3249		-5.2868	-8.34986
2.30222	0.110027		-0.577649	-0.0464118		-14.9892	10.8769		-2.19413	-21.3759
0.895022	-1.52713		-0.596779	-10.5499		-16.0432	9.17091		-3.36127	-38.1365
-1.04007	2.60856		-1.89127	-18.3347		-16.4445	13.2201		-4.14017	-33.4965
-0.477855	-2.07223		1.6811	-3.50913		-15.1065	10.7572		-4.9526	-19.4795
2.79358	1.5775		9.1115	-9.20662		-16.3508	10.6078		-3.83516	-10.9146
3.32873	-2.83808		-2.67172	2.74358		-9.54704	12.5911		0.627132	11.3459
-0.230901	-2.12059		-7.53556	7.12468		-17.2264	14.4774		2.59042	-8.21808
1.32612	-1.16887		-8.84669	-15.7955		-16.3468	10.5494		-1.97052	3.74601
4.7319	-2.83131		-5.56441	-21.9823		-17.7033	11.4695		2.11985	-8.88073
1.03571	-6.63536		-7.65835	-11.1669		-14.5698	9.51048		0.874697	-2.90234
1.50082	-9.79235		-2.0247	-3.90421		-15.0054	6.22		0.973552	6.79297
0.603262	-2.27637		-4.99116	3.94292		-14.475	5.50782		4.46118	-11.0647
0.313709	-2.71338		-8.7331	-3.94028		-12.2502	6.77332		2.83109	-11.9592
-4.75493	1.04782		2.45746	8.63378		-16.0414	11.2004		-0.492038	-6.32988
0.112126	-0.845695		-3.55903	-13.4306		-15.7386	5.98029		-2.05168	-28.5956
0.186323	1.04021		-4.61426	-3.9765		-14.3525	9.6806		-4.42698	-16.4033
3.26768	-0.281955		-5.47677	-8.96359		-14.0105	10.7836		-2.34632	-23.4688
0.798847	-2.32391		-2.50589	-10.973		-12.6117	7.63945		-6.03873	-6.73327
0.632185	-8.87215		2.1278	-15.6615		-13.6758	7.36787		-5.85024	-29.2369
-2.00843	-3.61495		5.83103	-18.0041		-17.2122	9.40105		-2.00484	-37.8332
-3.6522	-1.22197		-0.56773	-3.1594		-15.2598	1.44696		-3.00282	-31.3933
4.24347	-4.61077		-17.5014	-7.48035		-19.05	10.8037		-2.01324	-23.0701
1.89447	0.911312		-5.11581	-16.6225		-15.4104	4.75146		0.40438	-14.8309
-2.3515	-3.87673		-4.15402	-18.5087		-17.697	11.1258		1.67948	-2.97479
-1.38501	3.32952		-2.70331	-16.1359		-15.6961	10.2261		0.372457	-9.77614
0.226224	4.85856		-5.72635	-11.9563		-15.5415	5.47236		-0.435132	-13.9358
-0.131431	2.62771		-4.42014	-22.628		-16.0273	10.3791		0.191149	-33.8677
-2.59993	0.263849		-8.27768	-14.0198		-12.7126	13.6224		-1.99354	-22.2627
-1.5941	0.472242		-2.35686	-23.1574		-14.3431	11.9574		-1.81899	-18.2192
2.12392	-4.97092		-5.82596	-12.3716		-14.4906	11.5127		-0.517422	4.97274
2.68987	0.851337		0.705736	-4.59961		-15.5766	13.8449		0.265071	-11.0626
1.57838	-3.30338		2.92147	5.14171		-8.79125	-16.2961		-5.46644	-38.5637
-2.98129	-0.478998		0.626802	-1.33114		-16.2155	-0.242595		-6.20112	-25.0343
2.79844	4.40588		1.96931	-2.36902		-15.5457	0.336947		-3.10851	-11.7769
0.933764	6.12755		-12.369	-7.03651		-16.4385	0.117435		-2.51735	-3.06986
2.11916	1.0837		-2.6786	-3.09797		-18.2359	1.39087		-3.49996	-27.0048
4.43518	-0.745664		2.84987	-15.7385		-10.9986	-1.25689		-7.3727	-9.45889
4.56804	0.756718		-3.9919	-26.181		-13.3459	0.269154		-2.46783	-34.1578
6.27422	2.50815		-7.16266	-33.4698		-17.6478	-1.38682		-2.65604	-15.4927
4.59837	0.740966		3.03366	0.298567		-15.2462	3.08298		-4.46858	-34.8184
3.75164	-1.09835		-5.81596	8.28971		-17.4839	-0.152423		-8.23	-4.26804
2.39521	-6.51624		3.35615	-2.05887		-20.2519	1.83357		-4.9536	-3.46513
1.22951	2.62019		6.61584	-14.8076		-17.6198	1.28242		-5.87869	1.82093
2.55932	7.17106		-1.3004	-6.42953		-16.8617	1.5706		-4.38694	-3.25904
1.64594	4.7317		-7.64932	1.00283		-16.3817	1.74648		-8.12726	-4.98589
3.092	6.20786		-3.84936	-9.51731		-13.2487	-0.0873196		-6.04402	-4.19881
-1.17547	3.35342		7.88312	-20.1812		-10.714	2.56036		-4.57477	1.28486
3.04314	0.34481		-3.17492	-20.4818		-12.1865	0.886362		-4.56649	-6.19765
1.63156	2.0126		0.515485	-0.730548		-11.4138	4.33299		-7.95611	-9.26106
2.50479	0.145141		-11.6562	-16.7656		-15.2416	4.51105		-6.04814	-2.03834
1.87401	0.820423		-10.2902	-11.6031		-14.8911	1.66044		-4.97163	0.861733
2.38815	0.998901		-1.56714	-14.9146		-13.4649	3.09231		-8.17688	-8.36703
2.4422	-0.842275		1.50814	-23.273		-16.6035	5.39691		-5.97734	-16.4468
5.46718	0.0809839		-6.24298	2.8448		-13.4063	4.84666		-2.37255	-30.1654
2.51139	-4.64343		-5.16053	0.116685		-12.4932	3.67266		-4.6106	-21.9089
1.96774	-4.15576		-5.35911	7.37388		-14.1743	4.50523		-5.03652	-6.34874
-2.16071	-3.94348		-3.41528	7.19828		-13.5791	6.36148		-4.83938	-10.0047
5.75729	-4.16952		-7.99251	1.4872		-14.8595	4.21536		-10.0354	-1.13905
3.37936	0.531838		-7.42065	-8.68475		-12.539	4.45869		-9.35415	-2.71556
-0.510663	-1.9725		0.992128	-21.2754		-13.3204	4.56165		-10.8975	6.049
0.329165	0.489374		-10.045	-20.9711		-13.5102	1.75554		-12.1104	3.8464
0.882335	5.43211		-3.4373	-22.4703		-12.4498	2.5103		-6.33958	-17.5107
0.0810356	0.775864		7.82817	-14.3772		-12.5186	5.57849		-2.78206	-17.099
-1.67976	-4.00705		-8.45607	-5.91141		-11.788	4.93782		-3.45193	-21.1026
-2.10447	0.643047		4.87056	-8.18156		-12.4775	4.18765		-5.4642	-16.426
1.09964	0.110552		4.28906	-14.4478		-12.3576	4.40103		-2.53999	-12.6128
-1.44587	1.82321		-6.41905	-24.2721		-13.864	4.05613		-5.94423	-24.9125
-2.71289	3.44264		-7.86306	-26.1602		-17.072	-0.556326		-1.85316	-20.3178
-2.48969	3.25568		-0.909097	-10.9242		-16.8142	1.54915		-1.97032	-13.046
-0.600777	-2.78671		0.581646	-8.67421		-15.081	2.13725		-3.00554	-23.9132
-1.51796	-1.80163		2.89254	-2.88094		-19.8251	0.709971		-6.11695	-33.83
-6.70747	-4.39189		6.17038	-3.0374		-13.104	-0.331057		-11.5325	-10.1913
-2.56636	-4.76123		-2.12891	-1.85162		-14.3498	1.12988		-9.19304	-7.60547
0.539575	6.82634		0.0767488	2.44288		-15.993	-0.388897		-7.50142	-23.0506
0.851622	3.46248		-3.49286	-6.22552		-16.5957	0.15504		-6.64332	-20.0619
-0.0452516	2.2981		-2.05852	-9.24884		-17.8663	1.49129		-6.96199	-15.9564
-4.72813	-4.46367		-6.91376	-0.288246		-12.4724	-1.31314		-1.60309	-1.0087
-6.11469	-2.82764		-0.965421	-27.4417		-11.9741	-1.23227		-4.72639	-1.37633
1.02176	0.103126		-3.98386	-9.90304		-15.6324	-0.10951		-7.13753	-12.5866
-0.198741	-4.35637		-6.93841	-1.15201		-16.5068	1.39327		-6.86581	-2.01064
-3.14553	-0.962109		-4.91309	0.0757524		-17.1498	-0.119814		-6.21316	0.00880787
0.409033	-3.71559		-0.458318	-4.49854		-19.9969	-0.472696		-4.31637	4.76026
0.448141	-4.30471		-8.48727	-24.4003		-13.1419	-0.212673		-2.82198	1.81216
-1.31851	-1.91331		-8.39716	-23.8834		-11.9304	-2.31585		-5.34736	0.536911
-5.40589	-3.25223		-13.9929	-9.35408		-12.2512	-0.668498		-3.7416	-9.27523
-0.974596	-11.2095		-8.8204	-8.62127		-14.1704	0.0840208		-2.20246	-2.52095
-1.29492	-4.44836		-7.93561	-24.224		-15.9037	2.01605		-5.38757	-10.9527
-1.02239	-5.24535		-11.7454	-20.5873		-15.3	2.79834		-6.94078	0.101654
-0.999036	-2.81974		-11.76	-12.2155		-14.0494	0.335803		-7.67041	-11.6836
0.588224	-4.16094		-13.8367	-11.8992		-16.7197	-0.452158		-6.20942	2.69788
3.23853	-3.51039		-17.3677	2.55821		-15.4359	-0.58012		-5.12336	-6.86465
1.3821	-2.32275		-8.8478	-1.45504		-15.9035	0.400865		-3.21481	-2.70566
3.02163	-0.400768		-5.98266	-14.5457		-19.0066	-1.44209		-1.74635	-12.3395
0.615981	2.45265		0.1326	-22.2117		-17.7362	-0.423853		-0.956613	-12.5223
1.98623	-1.84627		-4.15929	-22.1654		-14.5952	2.84188		-10.6274	-0.50697
4.90188	-6.70725		-4.97722	-16.5421		-17.0383	2.75		-5.66133	-22.9686
5.62619	1.91305		-5.46879	-8.21707		-18.1892	4.05926		-4.97516	-20.526
1.52526	-5.21912		-0.622459	-7.74517		-15.384	3.46113		-4.03626	-28.3208
3.94069	-1.46801		4.61893	-10.7464		-17.9599	3.04936		-5.19222	-8.33668
9.00712	-1.69341		-0.491276	-23.9262		-15.4522	2.9676		-5.27864	-4.1386
2.97404	-5.66268		-15.4887	-1.03291		-13.4101	3.47796		-5.23091	-3.10009
5.79195	1.45658		-4.18149	-4.99958		-12.6658	3.54023		-9.67787	4.44718
3.73466	-2.97713		-6.31365	-4.94737		-13.5901	5.52949		-8.07556	0.506236
1.50403	0.00175712		-2.57369	-23.1121		-14.9792	4.33337		-12.1063	3.31602
3.93668	0.47913		-8.40558	-30.8992		-9.85435	6.58083		-8.766	-4.3358
-0.308834	-2.37627		-3.73222	-15.6686		-10.7642	4.11076		-6.15703	-4.08955
-1.06307	1.3267		-11.1807	-22.3137		-10.4187	5.19209		-4.16427	-18.1123
1.00875	4.62896		-6.80301	8.72144		-9.51048	6.27461		-6.16807	4.11611
1.58283	0.435673		0.814582	-0.336343		-13.2365	7.54301		-5.45789	-7.09978
5.85704	3.12277		-0.303977	-9.84537		-8.2711	6.72756		-9.7194	-4.04552
4.6213	3.0224		-3.95785	15.2076		-12.8958	5.4982		-9.36998	-5.38419
1.59315	2.2751		-0.878205	3.717		-14.6464	1.2318		-5.75649	-6.09665
-0.37771	0.324813		-9.88315	-2.11087		-14.601	6.93226		-10.5398	-2.15932
-0.157311	-1.05629		-5.44205	-8.10854		-14.7888	1.88881		-7.67717	-2.52539
0.842193	-1.5366		-12.9929	-9.84621		-14.6843	3.30349		-8.31822	-17.7944
-1.81465	-1.98956		-11.3051	-6.22563		-15.8535	4.0166		-5.88944	-11.4231
4.50467	-2.34396		-4.55861	-15.2095		-16.767	4.0876		-8.62588	7.52356
-0.338813	-6.34638		-5.4694	-9.85875		-12.7267	2.53768		-1.89984	-21.3902
3.00221	-4.93896		-2.48411	-11.7656		-15.3534	2.72828		-0.128775	-11.6733
4.03637	-6.51446		-4.37063	-12.727		-14.1106	1.17578		-4.13937	-5.26096
1.18024	-6.47956		-5.50246	-7.36439		-16.6957	2.91335		-3.96024	-17.0324
0.419543	0.265891		-6.51922	-14.2057		-17.3969	1.93767		-6.82951	-11.5759
1.59477	6.9498		-11.9492	-7.6528		-17.666	1.77814		-7.80249	-6.35666
6.32115	-1.16957		-8.37416	-14.154		-14.7258	-0.734199		-8.4151	2.37309
-2.04271	3.70105		-1.70821	-23.3378		-16.3496	1.7423		-5.7024	-0.185697
-1.06442	0.797686		-9.54678	-19.0256		-12.054	-0.672467		-7.20553	-5.50269
3.30774	3.21175		-14.0934	-24.206		-12.6967	4.54987		-1.21239	-3.62925
1.70302	-0.328038		1.36626	-16.6119		-15.7137	2.89775		-0.821152	-2.66618
1.35251	-1.47141		-3.78529	-8.70227		-12.8043	3.80931		0.521631	-2.76422
-0.747904	-0.0760057		-4.95582	-5.52405		-16.5999	3.23328		-0.792167	5.03289
-3.32927	-2.94346		-8.36456	-5.79101		-14.3573	3.32548		-5.14501	3.194
-4.33039	0.9373		-4.48127	-0.401435		-13.3941	3.08071		-4.46277	-4.22803
-4.83745	-0.0576976		-12.9535	-18.0076		-15.0097	0.989788		-5.9299	1.88463
0.0787239	-4.55458		-0.87705	-0.0378151		-10.6439	4.78651		-0.911674	3.06461
-2.7199	3.3718		-7.92737	-0.717122		-6.91755	4.55814		1.1145	-0.715625
-3.46905	-10.2361		0.185279	-12.2118		-6.65354	-10.2443		1.66074	2.09467
2.74474	-5.69151		-2.20413	-8.07048		-12.9203	2.55565		-1.84053	-7.61663
-2.16754	-8.64412		-5.2727	-21.8085		-18.0817	2.78436		1.80492	4.06989
1.05703	-2.02152		-2.44525	4.14215		-21.2788	5.56478		0.208081	-14.9812
-1.00886	2.37702		2.97076	11.1543		-19.1725	3.47904		-0.0427853	-8.78309
-1.90511	-2.25589		-6.55903	0.5968		-17.2291	5.50754		3.87912	4.1158
-1.59804	-1.72284		0.375012	-11.0448		-16.487	4.79631		6.34295	4.91032
0.799876	-1.89549		-10.8403	4.44416		-19.0078	5.17878		7.54434	1.55547
-3.99938	-4.06932		-8.32465	9.91736		-20.2754	5.71445		0.0469534	5.26787
-0.891646	-8.47299		-3.55493	-7.13657		-20.8532	3.1043		0.595904	4.63126
-1.39333	-0.251744		0.660732	1.28222		-20.6158	7.77659		-0.531401	-2.52667
-2.31523	-4.19517		-9.6157	-7.37281		-20.0634	5.83204		2.00375	8.00443
-1.57627	-0.359596		-4.14834	-0.294882		-23.0687	5.49715		7.43941	2.77868
0.529456	-1.71067		-12.978	4.65201		-18.4526	7.58477		5.28254	2.63161
-3.72826	1.73107		-12.2524	-9.65714		-15.3102	8.05712		4.32339	3.75034
-2.43896	0.19735		-4.62896	-16.9846		-13.4482	7.21548		0.750253	1.73897
0.0796296	-0.420902		-4.36475	-17.2895		-20.1873	8.00659		0.438852	0.567959
-1.19886	0.0890897		-14.3346	-27.4843		-18.5322	6.56603		-1.96104	-0.766257
-4.7816	-4.54983		-13.1287	-17.6419		-18.1848	6.41019		3.07469	4.83841
-3.74059	-3.17621		-11.6625	-3.37793		-15.5039	6.89032		1.69324	1.22247
-2.80014	-3.75532		-8.20642	4.50192		-16.5099	9.32438		-3.22881	2.25464
-2.00807	-4.03795		-2.50794	-5.07388		-14.3096	3.86151		-5.89894	-4.46788
-1.14614	3.78047		7.40048	-11.4204		-17.3262	8.32936		-9.77335	5.52451
0.305191	0.0902943		2.87488	-25.2681		-17.5561	4.39902		-8.09344	-4.85647
-1.4208	4.20987		-2.18628	-11.5891		-20.1101	7.61816		-11.1757	-5.23729
-1.05653	0.772585		-4.32638	-7.48111		-18.1447	4.5666		-7.63003	-9.01024
-0.798244	0.355813		-2.72559	-26.987		-17.5745	5.75577		-1.74336	-22.0793
-2.12883	-1.93015		-4.25997	-32.3465		-20.986	4.03808		-6.67737	4.55612
-4.97703	3.98741		-5.41045	-28.7487		-20.0178	4.0717		0.533456	-4.22766
-0.47277	1.32069		-7.49946	-25.3539		-20.2751	4.29796		0.908879	4.54606
-5.65881	0.561278		-7.56729	-16.0206		-15.8799	4.32797		-4.1044	0.0624549
-5.35143	-0.29801		-6.66174	-9.49882		-14.9822	7.58573		3.99935	4.26117
-0.230664	-3.44754		-2.72481	-11.1296		-16.5189	6.16133		1.99955	3.5504
-2.04164	9.34972		-9.6488	-18.2282		-17.6078	6.33475		0.562182	6.00586
0.447209	3.75406		-11.2135	-11.6516		-19.476	6.05997		1.06701	6.27302
-3.19995	4.84541		-14.2547	-19.0277		-19.717	3.60931		-1.93898	-5.37953
-3.80258	4.45636		-12.229	-7.02753		-22.0541	4.65122		0.841736	-1.0712
-2.56284	3.88641		-4.34987	-8.88268		-20.2723	4.62793		1.5782	7.52005
-4.87723	1.80706		-12.4165	-13.2223		-23.1376	4.28379		2.25943	5.05655
-1.00298	2.3016		0.509934	-11.7813		-21.4298	4.19588		-0.115016	8.19452
-1.35956	-3.22439		-8.13044	-9.22607		-23.7698	4.2335		1.25515	5.53213
0.399839	-1.54787		-12.045	-6.50735		-18.966	5.48949		0.653268	4.05025
-0.697566	3.77124		0.577497	-3.55775		-17.9551	3.22445		4.78535	5.68687
-1.09774	2.2495		3.21855	-17.0704		-25.4887	2.00666		4.14709	4.24598
-1.88386	0.646315		-4.42555	-10.8633		-22.3861	3.36865		3.5967	-14.4691
0.223259	5.4704		-9.89829	-10.5088		-21.6646	5.56707		6.65692	5.09721
-0.16184	4.66075		-9.13496	-28.2454		-19.568	5.80151		3.34127	3.63344
-1.41006	-3.98052		1.39398	-27.5309		-17.4942	4.51598		5.05766	2.14569
-3.15237	-4.80992		3.08767	-10.1499		-19.611	4.49803		4.88304	-8.35642
-4.25586	-0.365033		-0.882331	-10.2372		-20.6796	4.18783		1.91082	-10.886
-3.23841	2.52595		-0.532816	-11.1959		-21.3532	5.61173		-0.0574876	-15.7126
-5.37069	1.04539		-6.41031	-18.3979		-20.8624	5.65451		0.608875	-12.3954
-7.63112	-0.702618		-6.51247	-7.17239		-18.5724	6.01114		2.91678	-3.49897
-6.47048	-3.26587		-10.8539	-5.77327		-18.9475	2.95819		1.02832	-17.7136
-4.9188	-7.40554		-2.92669	-26.0127		-17.0668	6.32612		2.92325	-10.4334
-5.61188	-7.70134		-8.09936	-21.7606		-19.8338	8.82182		1.67579	-7.12413
-2.10905	0.526899		-5.94862	-8.12856		-20.7233	7.83559		1.40457	5.08684
-6.13129	4.50034		-4.74871	3.83276		-20.7596	7.08702		-3.2592	1.75489
-8.58282	2.92074		-5.96343	-7.0483		-19.557	7.55743		-0.248444	-2.39133
-8.87783	5.23688		-0.720586	-19.3112		-15.3428	7.3662		-4.85177	-6.65108
-4.15089	7.82373		0.532963	-22.3195		-19.1267	9.21078		-8.20446	-11.3612
-3.43878	3.94803		-4.04018	11.7972		-14.3195	5.94874		-5.29662	-18.0715
-2.31535	1.184		4.92309	-6.77625		-14.6095	5.60153		-6.15919	-12.673
-2.57597	1.80963		-6.39647	-7.10903		-16.36	5.55443		-8.7742	-3.2387
-1.33688	0.485886		-4.01128	12.4702		-17.7101	5.63444		-7.5851	-1.86913
-0.417086	-0.0845024		-3.82198	8.14634		-19.478	5.42057		-3.14524	-10.8381
-3.5454	4.52897		-2.25751	8.40413		-20.7136	7.39024		-1.873	-4.79428
-2.50679	6.59389		-4.15661	8.93325		-17.0858	6.05832		-1.68586	-13.1968
-2.67292	10.8955		-3.68718	-3.39219		-18.0026	7.11287		-2.63189	-8.55815
-0.0140775	8.38678		-3.44901	1.78712		-16.2097	8.84126		1.07504	7.22241
2.07929	5.69153		-1.96104	-23.8229		-18.625	8.4425		3.70096	6.08225
-3.67303	7.97066		-4.87044	-17.1236		-18.38	7.44512		2.09637	1.63241
-1.52652	2.07558		-7.80273	-10.2051		-19.9989	7.48739		4.46305	3.41729
-4.56605	-0.668896		-10.5574	-10.6341		-20.2087	5.90454		-0.336746	-6.42765
-4.67473	-1.04523		-5.99974	-24.4857		-17.9352	6.16182		0.128926	-20.4638
-5.43179	5.71697		-5.15332	-17.0143		-16.4452	9.14636		4.1481	3.90101
-3.76762	-1.39502		-8.73537	-9.10833		-17.5092	7.65372		5.10055	-4.09457
-0.97988	-1.50452		-6.33819	-6.50652		-15.5007	7.82834		5.59767	5.95107
-4.91811	-0.372254		-5.81169	-9.68806		-19.0914	6.47069		3.43242	-10.0244
-4.05571	1.20355		4.56371	-25.7587		-17.5771	6.80006		-0.660483	-6.04299
-3.40628	2.78361		-15.7675	0.827052		-18.5112	7.02722		-1.51548	-4.83016
-2.00572	2.06732		4.95697	-9.05007		-19.5063	6.18352		4.78798	1.49404
-1.35428	-1.11903		-3.49666	-9.26863		-22.9486	5.78648		4.41305	3.07338
-4.76932	5.2889		-4.65373	-11.1576		-20.6504	5.9303		3.97078	-3.2292
-4.27614	-2.40012		-5.13491	-0.256029		-22.6396	6.80549		-4.30952	-3.8195
-5.26702	-0.240397		3.89022	-23.4119		-18.7453	4.2036		1.62871	3.39772
-2.25342	-2.25249		-2.46212	-26.3068		-22.5658	5.08815		-0.794661	-20.1066
0.114038	0.9641		1.10961	-20.7864		-19.1353	5.95918		-2.62086	-12.5909
-2.40604	3.13728		2.75063	-0.948017		-23.0668	5.0058		-2.414	2.82208
-2.45655	-3.06007		3.67832	2.78121		-20.7904	5.84403		2.45548	-0.624996
-2.37381	-2.02149		7.62991	4.42586		-18.9111	4.05162		0.233425	-1.16722
-3.23428	-3.10101		2.75525	6.05747		-21.1415	5.65128		-3.17455	0.969065
-4.03015	-1.72919		-3.19057	-5.7367		-22.6585	3.91426		2.39559	-6.42076
-1.23956	-0.0177383		-5.01032	7.70084		-17.557	7.96443		1.51538	-7.24156
-2.34993	-3.40139		2.05008	-4.82776		-19.8035	7.92408		0.187301	-2.23504
-1.60933	6.1024		4.32132	-4.45541		-21.7693	5.20652		-2.12681	8.544
-1.02903	-2.59585		-6.57161	-5.70742		-19.9636	6.56558		-2.676	3.85941
-3.28596	-3.88935		-1.54623	-6.90527		-17.0505	5.68867		-6.40911	3.16239
-5.03918	1.95426		-1.79439	-20.4156		-16.373	6.71485		-4.61278	-22.6947
-4.1155	0.721556		2.03583	1.83774		-18.3141	6.57523		-5.09016	-23.1007
-3.07556	-3.30969		5.48341	-11.1692		-17.9248	5.33707		-5.17998	-22.3683
-2.97232	2.61646		-11.0229	-9.99076		-19.6019	7.13475		-5.91539	-6.21061
0.165939	0.61927		-10.2708	-15.3573		-19.879	5.24495		-3.38518	-7.1861
-3.6287	3.27327		0.0599286	-24.5264		-21.0419	8.20414		-9.63731	-10.192
-2.93476	-3.42578		-1.84833	-15.9865		-20.0048	8.82241		-8.19146	-10.2244
-1.92716	-4.97974		-1.36911	-6.09501		-15.7889	6.4436		-7.57584	-19.3065
-6.02959	1.10395		-9.95286	-2.04437		-21.7604	10.1076		-9.55003	-23.2329
0.692823	0.68787		-2.96749	-8.60229		-17.0769	8.06132		-10.753	-6.63848
-4.51119	8.02001		2.52478	-1.00337		-16.0957	7.97105		-7.88787	-9.64497
-4.4807	2.55044		-11.0723	4.82917		-17.0645	6.87915		-5.49453	-11.979
-5.86359	-1.83011		-7.51902	9.88437		-16.2427	7.94014		-5.50091	-15.9457
-7.20875	4.70165		-2.1197	0.184019		-17.719	8.6946		-1.7533	-3.96013
-6.02698	3.94756		-7.56955	2.0514		-15.6671	8.21728		-2.58743	6.57867
-6.75517	6.42003		-1.52422	7.75025		-19.9797	7.9934		-4.56629	-26.9328
-5.06164	2.12155		1.56153	6.07218		-18.9534	4.95683		-3.55845	-19.3819
-3.34324	-3.9859		-3.92852	-19.1676		-19.8298	7.94024		-6.57105	-1.88723
-4.89194	2.26381		0.30369	-12.2978		-17.6562	6.67349		-6.3092	-23.8933
-5.05946	7.59245		5.72235	-30.9028		-18.9272	5.3467		-7.67988	-16.9611
-5.69903	3.15028		-5.61257	-22.7034		-16.136	7.5074		-9.13607	-2.03095
-4.05077	0.987003		-10.8767	-13.2458		-15.4854	5.44369		-6.72733	0.00882074
-4.2661	0.171513		-5.78462	8.03346		-15.5509	5.92678		-3.84068	-13.284
-2.66107	0.448866		-7.04843	9.75179		-17.7254	5.69632		-6.67214	4.96545
-1.51667	2.16331		-2.9616	-4.88096		-20.6357	6.67366		-6.48476	-8.10146
-1.01092	-2.31011		-12.6271	-17.6368		-14.7612	6.31118		-2.33514	-30.7481
-2.98893	3.16631		-9.27291	-12.267		-15.2427	5.76106		-2.76047	-6.63421
1.16841	4.56103		-5.51655	-32.752		-19.6861	7.7664		-2.51079	-19.1186
2.14067	3.42843		-13.1654	-7.55518		-21.1324	9.24357		-4.41057	-3.33082
0.190042	-1.5213		-8.94842	-8.60915		-19.7199	5.29528		-6.03986	-20.6166
-1.42219	-1.61562		-11.333	-11.8708		-19.6197	8.17918		-7.24432	-15.4976
-1.15328	3.81519		-5.28761	-22.1295		-18.0621	6.24891		-5.66725	-21.9266
0.5312	2.46754		-7.33308	3.11753		-16.376	7.28611		-6.53377	-6.36656
-0.929482	0.0326062		-8.99964	-8.71482		-16.6558	7.93901		0.201294	-0.159544
-3.90488	-3.5061		-8.54857	-3.49948		-18.2519	6.60391		-2.51743	4.62482
-0.875267	-4.87747		-13.982	-0.319226		-14.3641	4.54952		-0.222023	4.42062
1.168	0.161842		-14.1081	-0.543728		-17.7758	4.56584		-0.859202	1.57311
-4.31189	3.67313		-13.3933	0.260796		-20.1716	7.74476		-2.63922	-1.59968
-5.50219	1.05435		-10.5801	-13.8782		-13.7538	5.9452		-0.882199	-0.839074
-9.58802	1.03642		-3.82429	-4.74503		-16.272	6.41672		1.79142	-8.77151
-4.64096	3.64479		2.11444	-10.1502		-19.8612	6.34863		3.98823	0.560892
2.24467	4.71661		7.44688	-20.6043		-19.2226	5.17306		4.29831	2.91895
1.23025	5.91172		-7.41071	-26.3491		-17.0391	4.48034		1.74077	-4.12779
-4.22127	2.23571		-0.604716	-12.0992		-18.0564	5.48612		-0.374878	-1.24392
-4.68076	2.84637		-0.161752	-2.10309		-16.1308	7.90966		-0.876265	-4.52239
-6.31802	9.03338		-1.36438	7.55363		-18.8152	7.74661		1.34549	-9.53499
-6.03227	-1.73755		-2.90588	9.32527		-19.3536	7.47169		0.158155	-8.7147
-3.26427	-1.40985		-3.61137	3.27681		-16.665	7.92058		-1.03891	-3.21891
-0.803735	-1.39707		-9.60771	-12.4418		-15.5502	6.76031		-1.44842	-13.4281
-2.31319	-0.0204941		-1.11899	-7.38187		-15.5359	7.76502		1.16816	-5.04267
-4.6155	1.38235		-1.82157	-18.5438		-19.8287	7.32313		0.832707	-11.8322
-8.01696	1.4843		4.14056	-11.9864		-19.1625	6.12822		-0.221913	-4.73746
-3.08152	2.82008		-4.22091	0.659416		-18.7371	7.64248		-0.789996	-3.14839
-6.49923	8.20098		0.149092	-13.0539		-16.4566	8.02181		-7.22678	-6.39917
-0.314631	5.85404		-1.62658	-20.2358		-22.0901	7.69952		-8.12719	-21.6963
-3.67893	5.45246		-2.16754	-18.6792		-18.295	8.12292		-8.94363	-14.8638
-4.10596	1.79816		-6.9243	-0.0286217		-19.301	8.51097		-9.29567	-1.26446
-4.27853	6.92826		-9.56466	-0.951617		-18.01	7.1902		-7.64318	-6.93647
-4.96259	0.720322		0.766106	-23.5319		-18.3445	8.63815		-5.98388	-0.55964
-4.80358	5.64389		-11.0905	-5.60421		-17.5507	5.80206		-2.07513	2.96213
-2.13898	2.799		-11.1461	-7.79245		-17.0961	8.82825		-2.20419	-7.40611
-4.56172	-3.70773		-14.7721	8.6859		-17.857	5.01577		-0.6456	0.00103101
-6.13733	2.31481		-12.2789	-14.6177		-19.2209	7.58862		1.87959	-10.398
-2.54124	-2.19944		-9.26959	-2.64274		-14.6917	5.02961		-2.72715	7.18904
-2.80218	3.51092		-11.4366	1.02679		-8.42042	-25.7519		-0.554414	-5.46157
-7.52443	0.171211		-13.16	-4.14255		-11.0385	-23.7381		-2.66233	9.29838
-5.00613	2.11256		-11.2906	-3.2977		-10.003	-10.4116		-0.472731	8.83587
-3.7143	-4.61037		-9.04369	-11.1485		-13.427	-1.36276		1.45161	7.72883
-7.14165	-4.28539		-9.43882	-3.88421		-10.3235	-8.94663		-0.852307	4.74595
-5.10048	-2.8171		-15.9314	-6.60808		-12.6802	-0.454491		-1.79907	3.3741
-5.89238	-2.85725		-3.77049	-29.654		-13.9608	1.52312		-1.54241	-2.36985
-3.65841	2.25274		-3.38049	-18.064		-10.9746	0.997295		-1.22589	6.71026
-1.27294	-1.59827		0.126505	-22.3213		-14.3192	-0.801059		-3.9192	9.24247
-1.79645	1.03539		-2.12798	-31.1733		-11.779	-2.62771		0.801848	8.94828
-2.32061	-5.89854		-10.1515	-23.4415		-8.60564	-20.8813		-3.55305	-2.59501
-3.40013	-7.30374		-12.2734	-26.9379		-9.46643	2.45547		-1.73312	5.22036
-3.09101	2.20328		-9.3953	-27.1792		-11.4537	-0.0182962		-0.195822	-0.839984
-3.50847	0.149892		-11.4109	-12.4384		-9.99405	-1.24956		1.81231	-4.34989
-2.91869	-2.96166		-12.4521	-14.6867		-11.5082	-11.9142		0.737857	-10.4084
-1.41093	-0.359343		-3.9989	-21.8773		-14.3252	3.48494		1.40834	5.82176
-4.66182	2.6269		-15.8072	-10.0198		-15.4128	2.30061		0.369572	-17.2275
-3.27269	1.04063		-11.8379	-6.54518		-16.0629	-0.597543		0.091883	2.24541
1.48158	-0.827656		-2.20551	-13.409		-16.1278	6.79484		-0.826105	-9.99328
-3.15923	1.35705		-5.27067	-19.1675		-20.3891	5.70124		5.79793	6.94862
-4.23905	0.298495		-9.82566	-10.9001		-17.4043	4.63308		3.23756	-1.41332
-6.82983	-5.72162		-0.649281	-15.212		-22.2672	5.80366		1.80953	-18.0182
-5.33548	-3.3362		3.85032	-8.10003		-20.7505	5.1376		4.26836	2.19912
-1.86813	-1.92209		-10.2132	-20.1206		-18.8569	6.87755		1.18359	-21.5363
-1.78134	-0.539635		-4.37667	-24.3663		-18.7239	6.9608		2.7573	0.163522
-5.50966	0.298774		-3.40099	-18.4067		-17.377	4.36289		1.77426	-4.36789
-4.03913	2.95982		-1.10131	-12.0874		-19.7756	4.42903		0.925055	0.408736
-5.23839	5.11798		4.16691	-8.8001		-18.8132	5.72513		0.495868	-7.24431
-5.27331	2.36141		-1.74001	-3.82924		-16.9591	6.9287		-0.226826	3.15759
-2.43874	2.81101		5.50424	-6.83472		-15.5807	8.41185		-1.37838	3.40266
-7.82123	3.14242		7.09734	-6.51127		-16.5075	7.1481		0.672636	-2.39269
-7.31579	0.325625		4.02856	0.595391		-16.4615	6.50245		0.485443	-4.41594
-5.97691	3.68003		8.48198	-16.9909		-16.3335	5.70961		-0.0682586	2.71929
-6.35915	1.73699		-3.08311	-1.05912		-17.1301	5.92261		0.799324	-2.36335
-8.32221	6.47699		-4.03274	-4.56601		-19.9078	6.00894		0.462719	7.10729
-11.2089	-2.72375		-0.606419	-27.3842		-18.109	6.55214		-1.88456	0.0652806
-4.21242	1.47725		0.861794	-27.4557		-19.8304	5.9144		-3.62642	-2.05916
-4.36313	-0.627759		-6.52692	-21.8802		-19.9241	6.20035		-2.89206	-9.52374
-1.82879	2.15351		-0.678181	-4.5482		-15.172	1.86577		-1.53518	-14.9498
-1.5422	-4.36523		-4.20374	8.48324		-17.8457	5.16375		0.253057	-19.2582
-5.41942	1.43762		-10.9648	5.6238		-16.5699	3.63574		0.159513	-5.43058
-3.57685	-1.71222		3.62577	5.69415		-20.8587	5.20262		3.57467	-0.382458
-2.24688	2.90463		0.980183	6.91235		-22.3551	6.49947		0.426379	-13.0035
-0.141655	4.29213		-2.48238	7.12063		-17.9324	4.5567		-3.63689	-3.47353
-2.38014	0.964605		-0.10335	1.26552		-19.8433	7.8082		1.01556	-3.92207
-4.00224	1.63527		0.881041	3.43656		-20.2478	5.52451		0.996008	4.84106
-2.90021	0.592542		-0.127735	8.95908		-19.0987	3.49894		2.22903	-2.33289
-1.21682	2.06131		-6.9354	5.11422		-18.2905	4.0263		-0.487464	-8.19586
-3.25874	2.13979		-4.52038	-0.0664581		-16.2767	6.23369		0.690182	-10.4565
-0.555915	-1.75969		-7.12725	4.79225		-16.7809	6.80539		0.554647	6.02025
-1.22876	-5.92735		-5.4889	0.21935		-17.8023	6.4986		1.42851	2.65374
-3.26722	-0.359738		-9.35815	-6.44142		-15.9663	5.09945		-1.42778	-8.85713
-4.67088	1.82777		-9.32146	5.01442		-16.2773	4.78136		1.9786	-0.988122
-4.95651	3.16233		-5.13478	-8.42776		-15.1255	5.29992		1.98905	6.46163
-5.27189	1.02596		-4.88513	-20.3948		-16.8607	5.51236		0.864832	5.25027
-1.67301	2.45532		-10.354	-16.5873		-13.4753	3.79731		2.8644	3.13174
-2.46759	1.03669		-10.0009	-7.67669		-15.313	3.72903		2.07723	1.4192
-4.51777	2.31533		-7.50048	-13.1901		-16.9224	5.3405		-0.468283	0.235405
-7.14066	2.40243		-8.07392	-4.44448		-15.7822	5.23161		-1.71331	-9.72199
-4.84113	2.61274		-3.81818	-8.2744		-17.9236	5.02557		-2.15527	-5.90644
-3.13062	-3.65302		-4.98593	6.06678		-19.8447	4.23428		-3.94475	-17.7539
1.17709	0.108711		2.82441	4.88727		-21.0316	4.52299		-1.44344	-10.1126
-0.966873	-1.15458		3.92259	-10.8563		-20.5996	5.42684		-2.72282	-13.7044
0.385619	-2.11181		6.13399	-3.95967		-17.9809	5.31872		1.08332	-5.03907
-0.841676	-4.15816		0.0858608	-23.2419		-18.5941	4.45257		0.326487	8.33267
-4.82715	-5.49667		0.989649	-16.433		-15.2302	6.08014		1.51245	-1.14024
-5.46645	-6.25516		-1.16958	-14.5629		-17.0565	8.48709		-1.26892	4.61727
-7.63082	-1.85326		-7.06271	-16.1765		-14.2503	7.64966		-3.13132	1.32813
-2.98407	-3.22283		-13.6271	-13.2712		-13.2025	8.56096		0.663386	-2.30983
-6.04463	3.00469		-5.59729	-20.1606		-13.04	4.37309		5.15429	-3.01518
-3.70729	4.62741		-2.8516	-24.6211		-16.7757	9.30613		2.39165	1.49249
-0.977395	-1.84536		-3.98224	5.83638		-18.1008	8.75308		2.97887	0.446839
-3.11877	3.14745		-14.7157	12.67		-15.0392	6.60063		1.82544	-6.19373
-0.970419	2.4627		-2.34483	9.59673		-16.3082	6.51111		-4.97961	3.783
-1.09767	3.22294		-12.0099	-11.8989		-21.3724	7.37077		0.335672	-16.5976
-1.75435	5.30641		-11.4065	-18.4199		-15.3586	2.6718		-0.68541	4.16575
-3.435	5.27776		-10.8548	-5.80273		-17.2939	5.06369		-0.24266	5.16331
-3.18256	3.13459		-9.07781	0.971953		-15.1139	5.34032		1.60036	4.23226
-5.11466	6.48447		-14.7028	3.09626		-14.9376	7.77077		-0.418501	-11.4915
-2.85267	5.02816		-8.20297	4.43834		-13.8298	7.39051		-1.82262	-8.94637
-7.44812	6.37147		-2.13969	6.69657		-16.0045	5.94723		-0.144143	-9.15409
-7.04639	2.03647		-0.242529	-3.22548		-17.6716	6.32504		0.401595	1.6052
-3.51304	0.983535		-8.69412	-12.8918		-19.2683	6.82827		-0.70741	0.941441
-3.78363	1.69013		-14.7556	-19.9132		-15.0772	8.06272		1.25731	3.67356
-2.90094	1.88545		-10.8793	-20.3511		-13.5414	7.09204		-0.872537	2.32328
0.0786039	3.64501		-4.90315	-19.1458		-16.1076	6.08498		1.06259	-1.84019
-5.28523	1.3319		1.03112	-0.797334		-17.7547	4.02028		3.00836	8.93565
-2.37433	4.59387		-4.83172	2.18862		-20.2617	8.24199		-1.097	4.60224
-2.97401	-2.27911		0.553913	-12.5706		-19.6511	6.55856		-0.637007	0.309251
-4.33683	6.02303		-1.43186	-26.915		-10.7717	-8.51168		2.11598	1.60855
-1.77115	0.0162128		-12.7022	-12.9466		-9.13181	-17.5705		-0.293152	4.79682
2.32552	-0.0594835		-7.56043	-24.2043		-17.7188	6.5255		2.93141	7.33907
0.407636	-1.38573		-10.2622	-9.82692		-16.6485	5.8256		0.957384	3.84364
-1.85459	0.625568		-5.16401	-18.743		-18.0681	3.77928		-0.815768	2.80119
-1.38428	2.53509		-7.29738	-34.9776		-15.6303	6.06634		2.96767	-16.028
-1.33331	-2.671		-15.3173	-22.8369		-17.6255	6.75221		-1.14016	-12.9495
-2.79043	-0.911297		-6.67032	-19.0583		-20.0403	5.75147		0.975579	-9.97304
-4.0153	-3.57356		1.17543	-28.4856		-19.9111	7.95935		2.16137	5.50857
-2.81488	-1.07563		-5.65681	-24.9405		-18.8245	7.08539		1.29787	4.89228
-5.13422	0.377606		-4.66298	-28.0014		-17.1601	6.13569		-1.70197	3.62595
-4.31383	-3.7666		-14.1617	-20.7648		-15.2247	6.1938		-0.148468	5.00503
-4.97423	-8.64388		3.84556	-15.0968		-13.7181	7.66502		2.96855	5.80606
-4.05134	-5.34403		4.17166	-17.9205		-14.6306	7.64581		-0.547578	-6.5229
-7.7248	-1.59823		-4.44371	-9.263		-15.2124	8.96494		0.801131	-4.94587
-3.5662	1.53402		-5.33808	-11.0295		-13.2077	4.56119		1.15621	-2.10784
-4.60092	2.81258		-9.30423	-15.4891		-15.0373	6.67881		2.92709	8.69691
-5.47448	-4.67731		-6.0747	-11.903		-14.3429	3.28814		5.61538	7.96255
-4.37171	-4.98166		-6.19833	-11.9641		-17.5414	5.98532		1.61352	3.75194
-1.4206	-1.12397		3.65278	-8.06785		-16.9946	4.81532		-1.41878	2.06801
-1.88789	2.29551		8.25297	-8.14288		-19.1722	6.04802		5.55682	2.06513
-0.815607	3.90993		0.366426	-9.34068		-18.0577	7.4554		1.99628	10.1802
-4.10944	-0.0131845		5.84658	-18.7457		-17.9628	7.15952		0.634339	8.92311
-1.11693	-1.44592		-0.311529	-18.8834		-17.7987	8.12109		-0.841859	-2.19199
-1.10322	2.49185		3.58805	-27.5704		-20.9755	7.99373		-0.965258	7.87259
-4.79798	-0.272268		1.17826	-13.6617		-19.0119	9.36232		-0.0984987	1.73275
-6.57823	-0.767476		0.744834	-15.7648		-20.4753	9.0131		1.51576	1.30734
-6.71764	6.23833		0.835933	4.06784		-21.2544	6.78772		1.64646	7.29606
-4.59223	-0.842638		3.19881	-0.721659		-16.2673	9.57186		1.64274	11.5444
-7.87164	-0.928819		4.44933	-13.7531		-16.7925	9.74758		1.53442	5.58001
-9.53038	-3.20114		0.454885	-6.08606		-18.8893	7.96092		0.957728	-1.43655
-7.2392	2.01967		-2.81402	-11.5694		-19.526	11.1741		0.476606	-3.64502
-6.26786	0.130264		2.52405	-22.415		-15.7815	5.48991		3.55791	1.64049
-7.89866	2.90386		-0.737741	-28.3023		-16.318	6.97457		0.528845	9.07222
-5.81524	2.82578		-8.86282	-16.0383		-16.0227	9.42728		-0.321745	7.88782
-5.21006	9.18834		-7.57783	-16.8517		-15.6489	10.1604		2.3281	-1.07172
-4.12701	-1.31002		-13.8941	-18.7472		-14.7314	7.70405		0.702223	4.01497
-6.92311	0.746266		-19.2705	-14.0868		-15.4072	5.39173		7.1097	6.20515
-6.00822	6.41278		-8.77725	-22.6619		-18.1641	5.69068		3.80493	-0.168282
-3.59111	4.737		-20.072	-8.83427		-14.6173	4.62339		0.189261	-6.42052
-4.98688	0.891547		-16.5284	-4.29814		-21.5405	6.05867		0.660121	4.60442
-4.77394	2.48184		-9.77465	-2.65022		-19.4202	4.57575		0.816756	-5.8527
-1.18423	0.168054		-7.09838	-0.385492		-21.1528	3.11775		-0.34481	-9.31592
-5.10644	-1.59911		-10.8982	-1.69645		-16.6756	5.142		-1.10397	9.4188
-6.37989	-1.57989		-8.7321	0.67242		-18.4876	7.00279		2.96629	-2.71424
-4.8969	-2.23846		-12.084	2.16385		-19.4014	7.12879		0.870078	-0.543444
-2.43355	-4.51542		-14.3925	10.5751		-18.4538	4.54895		3.93997	-3.83932
-2.65378	-0.822397		-18.4911	1.50936		-20.43	5.57602		2.28238	4.05519
-4.2285	-1.46847		-16.5906	7.56068		-22.3751	3.30302		2.89822	4.77971
-2.47337	-7.40427		-17.8405	-2.33857		-20.3765	5.60034		2.32185	0.287729
-4.2953	-0.430494		-9.92062	3.63047		-21.4878	6.88276		4.70825	6.44777
-2.51994	3.46348		-8.78317	8.8522		-18.9432	1.72523		7.65873	6.18208
-0.653153	-0.907485		-17.9372	-1.71098		-13.4133	-7.62408		3.84806	8.16958
-0.688255	-1.21897		-19.6885	-8.16478		-12.7458	-11.8976		2.0832	3.88811
-3.68809	-1.07094		-10.2624	-6.24925		-13.6046	5.16216		-1.75009	-0.467066
0.780003	-0.235543		-12.427	1.44095		-15.5995	-3.6664		-0.317128	5.44161
-5.90741	-1.13471		-13.6245	5.08434		-8.63846	-3.21354		1.68502	5.41322
-4.33079	-2.57921		-16.3534	8.33785		-8.21256	3.90691		1.15154	1.95177
-2.48921	-7.42797		-15.5218	11.6739		-7.99494	2.09341		-1.12441	4.50695
-3.22701	-3.76225		-11.3002	8.12392		-7.52265	2.48936		2.96247	-4.65068
-2.33236	2.46897		-12.0251	4.72553		-10.1545	4.20587		3.67677	3.46755
-1.97227	3.76175		-12.8655	-8.65678		-12.902	2.83913		-2.70147	5.27058
-1.51387	-6.60698		-18.9788	-7.68347		-14.0702	2.84065		0.0785422	-3.14417
-0.920228	-5.36006		-17.8244	-8.20839		-12.8481	3.81448		-0.886882	4.29422
-2.26906	1.68674		-17.8267	-3.88936		-13.696	5.0132		3.32801	4.01423
-1.94372	-0.268244		-20.6911	-1.3676		-14.1664	3.27968		1.02789	3.65854
-2.88292	-3.40258		-15.2305	-9.4749		-14.6236	3.95765		3.60946	3.39952
-5.37163	3.95468		-20.0868	-5.41533		-9.68288	2.94205		0.666505	-0.532639
-1.03457	-2.80103		-23.0834	-5.7551		-12.9615	3.01531		0.88194	-5.74066
-2.45868	0.843267		-18.0605	-9.2432		-16.418	6.20242		-0.277493	3.9396
-6.98759	1.95109		-21.8972	-6.48206		-12.596	5.74484		-0.0377484	3.52297
-4.97524	5.23027		-16.7137	-7.59288		-14.981	1.32387		-1.55762	2.14361
-6.03856	-5.4738		-10.5099	-7.96766		-12.6212	6.27853		1.29309	6.50784
-8.34189	3.8432		-8.08851	-16.8167		-12.6522	4.36174		2.97388	4.68642
-5.91722	5.08565		-4.83596	-18.5576		-14.4422	3.16775		5.31667	0.349034
-3.41274	10.7674		1.96269	-23.6274		-15.0853	3.15692		6.52934	6.01631
-2.92375	7.73817		12.3071	-17.6203		-14.3486	4.00851		0.534505	4.49895
-1.48363	1.0397		7.24901	-16.6647		-13.9138	4.03669		1.63556	4.66532
-0.638115	-1.07931		6.21655	-12.0087		-15.8769	3.31592		-1.10253	-8.45366
-1.67489	5.52626		8.83621	-13.8969		-14.433	7.00758		2.53736	-5.49875
-6.17104	-1.55308		1.57341	-4.62451		-15.0563	3.61015		0.981699	3.31152
-4.60048	-0.387556		6.17625	-4.82299		-15.413	4.72054		0.0801891	-2.46157
-2.01857	2.03582		-8.25864	-11.2583		-14.4903	4.65511		1.1717	-11.4897
-5.68294	3.04103		-6.18581	8.45473		-13.0761	4.53114		0.504303	-4.5477
-0.999763	-3.15135		-10.6493	-5.41653		-14.6626	6.16943		1.823	-3.98075
-2.17551	-5.86266		-3.34921	-18.498		-16.5552	4.98077		2.87235	7.60591
-5.43775	1.62942		-0.176964	-17.6249		-17.0823	4.61665		6.11694	-0.452257
-1.8023	-0.24546		-5.26585	-12.2237		-15.8972	4.70917		1.31314	-8.84137
-1.76663	0.376993		0.838042	-1.49211		-14.3539	3.39949		1.94182	6.28994
-0.0755199	5.47503		-11.323	-5.84817		-12.274	1.53404		1.83426	-3.18082
-0.191043	1.03286		-6.63497	-16.3653		-16.7355	2.57124		1.47403	1.90384
1.37481	1.44702		-9.50199	-3.05688		-15.1827	6.79861		0.626783	-2.34177
-2.17759	7.51389		-9.10817	3.66891		-11.7807	7.049		-0.719627	-2.74837
1.66659	4.85555		-4.79042	2.31687		-14.7486	3.23914		-1.74736	-0.0923958
1.63412	-3.03452		-2.37591	4.18078		-15.7982	3.89514		-2.73198	0.403956
-1.22356	-2.04503		-3.34102	-4.01816		-15.9941	3.43892		-4.98057	5.19106
-0.696261	-4.12372		1.88671	4.6241		-11.3144	4.3472		-5.73675	-15.2282
0.127288	-4.44665		-3.74224	3.67471		-15.0943	2.55382		-6.92046	-2.32339
0.945688	-2.09659		-4.81257	3.96922		-13.1769	5.36085		-5.48198	-10.3226
-0.201118	-1.35899		-8.70461	1.41571		-14.9312	6.4419		-3.76406	-5.06175
-0.776027	-1.59732		-6.65712	2.78671		-16.0303	4.957		-5.35253	-25.9937
0.869977	-2.1267		-5.49786	2.67923		-16.2601	4.4023		-3.33085	-12.4119
2.20138	-4.89389		-3.49746	4.80287		-14.762	4.33729		-2.77088	-6.64849
3.96757	-0.0681428		-2.14917	-1.86619		-12.4439	5.44382		5.05859	7.69362
0.524029	2.98363		-3.45005	-1.57307		-15.6128	5.96069		0.804644	-0.708624
-2.94116	7.60523		-0.0023814	1.10534		-15.2453	5.04057		1.74038	0.295564
-2.72285	-1.001		2.66699	-1.46754		-14.7345	3.81229		0.273734	8.80529
-0.789384	1.85148		-3.52112	4.54765		-13.2305	6.75936		0.0900967	-8.74313
-3.25376	-3.69803		12.9551	-1.5525		-12.8556	7.33112		-4.6697	-4.96253
-2.95271	-3.19294		-3.33004	3.12525		-13.2801	6.26854		-5.86537	-2.28442
-5.38577	-2.52218		-7.46038	-10.1983		-14.3901	5.95958		-7.65765	-12.2614
-4.28065	3.82901		2.71442	-29.9034		-14.4451	7.06975		-9.12259	-9.09878
-3.09571	2.72747		8.39843	-7.62105		-15.0546	3.02844		-12.6321	7.60701
-1.321	3.47807		5.17581	-2.67288		-15.3786	6.71143		-13.5565	2.82197
-4.90339	5.86032		-6.22896	-7.79136		-14.1956	3.49156		-6.57946	-12.7915
-2.00763	-1.3719		-6.88027	-12.0784		-16.1819	4.64314		-10.9262	-0.773513
0.722024	-3.03697		-2.97897	-1.97578		-12.1208	6.41918		-3.94818	-25.0459
-5.16038	-4.66492		-8.42345	-7.88405		-13.92	8.26862		-7.51163	3.82074
-4.32253	0.319227		-2.21003	-25.3476		-15.3473	6.39106		-5.46946	-16.946
-4.42171	-0.322303		5.56317	-25.977		-13.8917	6.12116		-5.28487	-36.2851
-5.31445	1.54344		0.786118	3.70891		-14.6011	5.75247		-5.79179	-17.3682
-4.98885	-3.80659		5.28207	-8.92371		-10.2741	4.40653		-6.91549	12.1079
-6.90292	-1.096		10.3338	-2.80439		-11.6593	7.01831		1.10531	-6.16117
-10.2805	-0.505876		11.2172	-7.93479		-13.2946	5.61699		-14.4248	-14.5842
-7.71191	3.77026		2.61587	-24.092		-13.109	5.21774		-7.68436	-6.80165
-7.91238	-0.787267		8.55119	-6.70408		-13.2314	5.46434		-12.5495	-14.2054
-7.16274	-0.101809		1.11253	-7.56135		-16.3385	4.10006		-10.2317	-2.92153
-5.67862	-3.02199		-1.28448	-5.40676		-12.9677	3.44776		3.52717	-10.9747
-4.3816	1.44877		1.53038	-5.60469		-12.3454	4.86871		-9.3759	1.1004
-6.46322	5.3306		-3.50877	-4.0914		-12.076	3.79018		-8.62414	-4.78597
-2.46909	-4.54957		4.08046	-10.1301		-16.3298	5.57369		-15.9475	-13.1811
-3.19084	1.65792		1.65525	-24.4714		-15.1148	2.16283		-3.19449	-22.6333
-1.31017	-3.77797		2.87546	-16.5812		-13.8429	4.12204		1.2857	-15.4138
-3.64153	-3.45047		-0.775245	-5.39112		-17.294	3.232		-5.97102	-19.4798
-2.83685	-6.87068		4.19583	-1.66		-14.9839	2.8468		-7.70162	-7.06214
-0.957525	-4.88914		5.37333	1.35492		-17.6725	2.68355		-5.62921	-12.0673
-0.508919	-3.52291		4.6775	7.49806		-15.8794	5.28661		-10.1068	-17.1611
-1.76338	-5.7587		5.31476	-0.0298336		-13.6313	5.16813		-16.534	-3.79934
-1.74424	-1.53002		4.69255	2.40716		-18.6319	4.762		-13.0399	-3.89898
-1.25621	-0.435903		6.19089	0.209416		-17.7634	2.71062		2.79693	-23.3826
0.505963	-0.168058		11.2679	-10.6098		-17.3072	4.21839		-10.1142	-30.0571
-2.55146	0.395542		1.38009	-24.1387		-18.0663	1.55939		-2.01595	-16.6815
-4.1778	0.536283		1.24192	-20.0722		-13.3665	3.74009		-2.04379	-28.0024
-1.83735	-9.3912		10.5307	-32.194		-17.6174	3.50454		-4.5765	-18.9189
-5.81549	-2.25638		6.80787	-8.74539		-18.9841	5.47088		5.20491	4.58851
-3.99358	-2.1557		4.06734	-11.1033		-16.1543	2.42809		2.26246	6.23014
-0.571289	-7.18317		0.33774	-5.48188		-13.6215	3.68711		4.72597	-0.799603
-0.836032	-7.03049		-9.64711	1.48887		-11.9168	2.45681		4.60668	3.65092
-0.570873	0.0557774		-8.55586	-1.33577		-11.5881	3.46087		4.39851	7.59689
1.62867	-1.95648		0.773561	2.38526		-14.5185	3.21089		4.53421	0.325092
-2.33264	-5.76204		-7.72589	7.85188		-14.1813	4.04942		2.23997	9.17721
1.54051	-7.73145		-5.55867	-3.00059		-14.3309	4.29712		-5.70691	6.14752
-1.93997	-11.9741		-5.83648	4.56324		-14.6279	3.98723		-11.8064	3.17731
-4.36425	-8.40194		-2.66201	0.83997		-15.763	5.21915		0.154152	6.8034
-3.31207	-5.10277		-6.95863	-7.03615		-15.3861	6.06625		-9.04096	-7.12703
-5.41048	-7.85054		1.85415	-1.53299		-12.9511	1.76571		-7.07982	-3.57787
-0.0773736	-9.19113		-4.12133	10.2165		-16.0332	4.17067		-7.73767	-11.5281
-4.55004	-2.84889		1.41775	-16.3886		-10.5061	1.76233		0.793612	-29.356
-3.28745	-7.86367		-0.603159	-24.855		-14.7733	-0.0548315		0.00600179	-20.3992
-4.63645	2.92567		3.46373	-0.5447		-16.3225	1.88386		-6.57989	-20.7044
-3.49609	-6.14115		11.5667	-9.8755		-14.0578	3.00016		-2.91605	-21.8459
-3.03082	-5.31897		9.78016	-25.8168		-12.7545	0.227099		-1.72055	-24.7302
-6.22754	-6.6156		6.28175	-18.4019		-15.5295	4.7076		1.75398	-20.1173
0.425286	-2.65955		-0.838862	-0.71175		-13.689	2.87719		-0.327629	-6.78962
-3.45817	-4.7316		1.34495	-5.29692		-11.0582	5.5816		-5.52298	10.1617
-5.9279	2.65948		2.94631	6.07265		-14.9371	3.02387		-0.58062	-2.75847
-5.49328	-9.00972		4.67163	-21.7515		-13.9951	1.84122		1.53848	-1.22589
-1.07352	-5.95618		7.19929	-30.413		-16.9047	3.58222		1.93228	-12.5053
-1.59278	-3.84755		8.41813	-29.4312		-12.0663	-0.267428		-10.6615	-18.1703
-2.8715	-3.84713		7.44285	-24.3609		-5.79624	-3.6245		-3.69512	-19.5318
-0.703245	2.02782		2.99446	-23.3751		-12.6936	6.90601		-2.90401	1.0262
-3.78273	-2.57613		3.62615	-16.0709		-13.606	10.8324		-0.947315	-17.4728
-2.33975	-5.92353		5.38579	-4.81696		-17.0006	10.8821		-1.50788	-13.3238
-3.24406	-4.5962		5.69824	-1.77011		-16.326	11.9841		-0.885927	0.901838
-4.16987	-1.33084		8.36667	-0.684892		-15.586	2.23362		-0.918619	-1.21363
-1.65713	-3.29643		3.12092	-19.1359		-12.8714	11.4288		-2.14284	-25.4087
-1.9955	-3.88665		10.5965	-17.0746		-9.47655	8.46484		-4.34749	-31.8267
-2.36278	-8.45109		-1.80434	-3.18631		-10.2237	7.92432		-6.26413	-32.4993
-6.80711	-4.10492		4.82767	-11.653		-16.0615	8.4202		-13.1154	-21.7831
-3.13077	0.784999		7.91927	-27.57		-17.0476	6.62053		-14.0918	-23.8893
-2.28355	-6.73659		5.62211	-19.5566		-16.3664	6.27194		-2.22533	-22.3609
-3.39186	-6.72234		1.03516	-17.6259		-13.6758	8.83797		-6.64913	-9.34845
-5.60075	-9.10642		5.76249	-18.1721		-14.653	4.86352		0.694603	-11.4684
-5.27963	-6.59509		10.9795	-15.2103		-15.0824	7.63969		-2.74984	-25.9728
-8.5314	-4.12718		11.0732	-24.0225		-11.9839	8.57143		-4.03588	-25.2213
-6.65	-2.05575		15.6128	-1.9717		-16.3949	-1.00811		-2.29388	-6.32968
-1.35833	-8.10513		11.8579	-21.6336		-17.2508	-4.53418		-3.3159	-1.39351
-3.1651	-12.7341		5.76739	-12.4699		-13.7418	-7.66697		0.987251	4.21175
-6.1257	-11.9199		12.559	-0.43441		-13.1744	-11.7443		-3.82665	-9.23571
-6.43838	-10.6815		9.24954	-4.40878		-14.805	-6.16064		6.06392	-27.3671
-3.69393	-2.68346		10.7531	1.08466		-16.092	1.54239		3.05416	-27.1784
-9.11762	-3.15322		9.4857	5.9345		-6.72364	3.68767		-5.05951	-24.1158
-1.83668	-6.454		9.88563	1.64268		-7.44055	6.97936		-6.13251	-26.6817
-4.82768	-3.70893		10.0094	3.40963		-9.16254	1.28214		-1.35388	-20.1028
-3.82722	-2.52649		10.9411	4.8602		-8.56526	0.543171		1.14619	1.91137
-3.28454	-2.70222		7.71583	-10.3882		-6.82621	4.36375		3.86934	-17.9067
-5.09403	0.346806		11.3335	-13.6742		-9.08711	6.88366		-14.6008	-5.82458
-3.91216	0.913006		6.52749	-23.7708		-9.43421	1.30376		-6.66437	1.65482
-7.52346	-0.2447		1.96918	-18.6833		-8.14764	1.29376		-4.29769	-12.783
-6.76049	-0.977134		-5.46231	4.34885		-13.3049	-9.45453		-1.39709	-19.8003
-3.8909	-6.24933		1.62966	-15.6498		-19.711	-6.58597		-3.06798	-17.4809
-4.46342	-6.63853		0.32728	-21.2733		-19.3725	-6.46026		-5.27045	4.87105
-4.89831	-8.52887		-6.52213	-5.6062		-20.7902	-4.32124		-3.62427	0.326255
-1.26221	-7.3657		-3.97047	-12.6663		-17.3198	2.62863		-17.6132	-3.60924
-2.66225	-0.107829		-2.27835	-22.8093		-15.4787	-1.87604		-15.3018	-14.3536
-1.1601	-2.04075		-12.5527	-11.1077		-13.8656	4.7896		-1.91942	-35.2157
-1.10908	0.803521		4.5048	-11.0799		-16.618	9.71478		-2.29904	-4.63028
-2.70722	4.95928		-1.99417	-19.3178		-13.3107	5.01556		4.369	-19.0411
0.998857	4.49624		-9.0138	-25.9833		-15.842	-1.63357		-4.70044	-10.4806
-3.29038	-3.8021		-12.3625	-3.66787		-17.9266	-1.55858		-7.58554	-2.687
-5.12997	-6.74036		1.48519	-4.90797		-17.194	8.32441		-4.45672	-2.78973
0.179613	-11.887		-13.7431	-18.4643		-17.1967	9.81504		-4.3706	0.343338
-1.77488	-6.94352		-7.93029	-31.4334		-16.1747	10.9209		-6.86593	-5.7179
-2.04761	-0.291384		-5.84069	-31.0461		-10.5599	4.73244		-2.69203	-18.3769
-0.734175	-4.91288		-4.34068	-22.5689		-18.0648	5.91162		-7.15322	-5.00642
-3.10954	-0.756913		-3.9269	-24.2941		-20.0116	0.0175514		-4.47855	-8.6542
-3.63379	-2.66271		4.28132	10.8276		-23.6907	-5.23482		-5.93229	-20.8242
0.914671	-2.23821		-6.02604	-8.35486		-18.3461	-1.44875		-6.39578	-13.5802
-0.442618	-0.889197		-9.95586	-4.74717		-13.9555	9.65841		-0.482179	-17.2827
-1.49325	-2.25386		-12.0332	-7.04985		-12.7309	3.38126		-10.1034	-28.8882
-3.34184	1.88759		-13.5896	-9.29389		-11.1678	7.63037		-6.92714	-13.619
1.69398	1.81198		-14.7974	8.91949		-11.9486	6.13259		-1.98832	-1.27621
-0.706306	-3.48132		-12.7843	-2.92923		-15.4943	6.35791		-4.00889	-2.30536
-8.33023	-2.42292		-18.9464	-3.89063		-15.9848	10.3797		1.24516	-6.88495
2.90759	-0.384881		-15.124	-0.0388181		-17.7715	10.5675		-5.79979	-12.6536
-4.59826	-4.8304		-12.6615	2.28523		-13.4711	10.2704		-9.02898	-21.5983
-1.15052	-6.06582		-8.39214	0.854117		-11.5643	5.43285		1.6373	-23.4282
-2.69562	-5.13291		4.69277	-1.18835		-13.0382	1.71406		3.84132	-21.2127
-4.26624	-3.89189		-0.858635	-10.987		-11.6862	7.95256		0.546808	-24.8916
-2.48181	-4.30938		3.24658	-10.0391		-12.1717	8.1186		6.67448	-23.7623
-1.63752	-6.5404		2.00317	-14.6073		-9.93469	0.731428		-1.22454	-18.9126
0.0124097	-6.10371		2.26295	-24.4206		-15.7003	10.3988		-1.88669	1.23645
1.35429	-6.37345		-3.3707	-27.4822		-14.4544	8.88735		1.85411	-21.4338
-0.730752	-0.100641		-1.44918	-18.7491		-16.8408	2.7938		-0.85203	-27.9989
5.46444	0.116186		0.350264	-4.24959		-20.7535	2.4939		-4.99832	-27.7705
-1.28398	-10.081		5.94	-15.0567		-16.9693	7.12608		-5.89919	-18.1809
-1.91293	-9.70508		-6.04964	-22.4054		-19.9507	2.48955		-12.3711	-6.31128
-3.03971	-8.20894		-19.8661	12.821		-15.7911	-4.14089		-14.8585	-3.19344
-0.375054	-7.14909		-14.9489	14.2306		-13.9224	5.50599		-12.4619	-10.6287
-0.962746	-5.81085		-18.3864	11.5506		-16.5645	2.80373		-7.12109	-6.50836
1.46667	-9.35993		-16.6129	13.8635		-17.0628	3.06935		-1.26651	-22.9196
-2.24546	-2.27607		-19.969	11.5658		-17.3678	3.05789		-10.9419	-11.1947
3.45029	-2.46647		-17.8704	15.468		-19.7512	-0.357983		-3.98994	-8.8052
-3.41033	-1.51682		-17.2208	8.69895		-9.84623	9.61244		6.91797	0.545646
-0.717506	-3.02793		-12.8543	9.89041		-13.1939	2.41941		-3.37548	-7.4332
-2.45139	-4.22245		-12.3511	7.18154		-15.4585	11.8833		2.83954	-12.9638
-2.48357	-2.68864		-14.0878	6.73679		-14.611	9.90656		4.00334	0.0833264
1.36145	-1.65896		-15.2373	8.26127		-12.2771	11.1163		6.94196	-2.26224
2.55844	-0.561555		-6.6925	1.3661		-15.6432	5.15191		-0.676647	3.87187
-3.8861	0.0278784		-7.51622	1.57701		-17.1202	0.0978822		-12.8096	1.10815
0.572056	-2.32045		-13.1034	4.67127		-20.2526	-6.72432		-8.51427	-5.13937
-5.1186	1.70094		-13.9454	-1.2175		-12.9328	1.73424		-6.35724	-31.2947
4.49884	-4.16334		-16.916	7.62841		-11.2034	1.32935		-5.58237	-25.3537
-0.37182	-4.59687		-15.7592	6.22401		-13.5722	4.80637		-5.00246	-4.88666
2.3184	-6.96788		-9.65664	0.148866		-13.0377	7.64398		-8.50558	7.8096
0.248299	-2.08197		-13.1885	0.217205		-16.7414	1.38303		-9.80954	-1.31969
-2.34658	-0.146578		-16.5778	7.19667		-18.2032	0.369663		-3.77788	-13.8549
-3.15949	-7.10259		-23.5854	1.23344		-17.5512	7.56784		-10.269	-10.7536
-5.7666	1.9877		-20.2212	-0.0605268		-4.67412	-19.5987		-1.83056	-26.1699
-7.01817	-2.79272		-14.8777	4.26358		-2.26886	-32.4299		-15.2952	-32.4719
-4.37008	-1.14251		-14.4887	0.955534		-16.167	-6.04625		-9.49776	-17.8283
-3.10433	5.41575		-16.4304	9.45947		-13.4661	0.296044		-9.03573	-17.7546
-0.293378	2.96135		-11.7287	3.07119		-16.2811	6.07715		-13.4753	-12.4925
-1.02445	2.17352		-14.5129	10.4297		-17.2848	-5.93616		1.43511	-17.1215
-6.967	3.37062		-12.021	4.41635		-14.1321	2.43401		-7.15972	3.41349
-2.34381	1.99868		-14.348	7.46015		-11.7893	6.78336		-9.40708	-6.24033
0.25425	1.5182		-7.56225	-5.59957		-8.5615	-3.50944		-9.03231	5.8211
-0.93085	-10.8956		-11.4951	-8.30534		-8.23856	1.34623		-17.371	-15.0226
-0.343609	-6.42427		-7.67428	-3.21194		-5.22402	5.29499		-9.61606	-17.4406
7.39248	4.06706		-14.0062	7.58294		-10.1737	-2.38511		-3.33179	-27.986
1.16746	-1.64041		-14.5628	-6.87986		-8.02353	-5.84654		-4.46317	-22.873
-0.894421	-3.20464		-4.18057	-16.5582		-7.04947	-1.51885		-5.33131	-19.7861
0.627177	-4.62479		0.197532	-24.8552		-14.6727	-5.58856		-9.58874	5.17309
-1.0586	-2.12401		-7.52283	-11.3977		-12.0293	-4.70581		0.774809	5.35638
-4.77343	-1.79721		-4.39657	-9.03469		-18.4763	-6.16243		0.645179	2.01302
-2.74438	-6.7196		-7.38706	-24.2708		-13.7959	10.4638		-11.4083	-1.31229
-0.631014	-2.85248		1.52418	-14.5851		-12.4074	10.1979		-3.16001	1.75475
-0.860858	-0.968287		0.919598	-30.702		-12.3659	9.02018		-1.2744	7.09514
-2.15741	1.5701		-2.50686	-22.7842		-12.908	-2.8192		-8.20554	-6.28395
2.41357	2.61479		-2.84871	-20.436		-9.8052	1.67646		-4.6213	-2.74013
-0.486924	-0.738787		-2.1353	-29.2862		-12.091	7.80902		-12.5677	-2.1396
0.955978	0.315016		-2.34679	-20.2143		-15.7395	7.24808		-8.10423	-11.4768
1.21442	-2.91365		1.36925	-16.7473		-9.20757	5.67885		1.11356	-32.5403
0.213781	-3.21706		0.659681	-29.6183		-8.67302	6.44488		-10.7094	-22.8814
1.6121	-8.54687		0.0817446	-34.1815		-13.5767	3.63869		-6.69363	-25.3482
2.87739	-4.52257		-0.278162	-29.8639		-7.51921	1.74982		-0.809718	-35.8648
-5.35814	2.10707		-1.62807	-18.6947		-7.65938	6.41377		-2.83942	-31.6
-3.55743	0.883726		-2.04954	-36.351		-13.2136	2.82011		9.83866	-29.5762
-3.55106	-1.93344		-3.94375	-31.0618		-7.19176	4.44847		0.599699	-12.7873
-3.69261	3.41317		-1.46159	-30.6018		-7.49997	-3.61078		-0.323539	-6.3877
-0.9986	-6.32457		-5.55885	-22.289		-9.66027	-4.18773		-7.50612	-7.65001
-0.984899	-7.10777		-1.97908	-36.371		-7.988	2.51457		5.33801	-29.4589
0.698981	-0.975059		-1.00765	-40.6331		-7.34601	6.27659		0.75096	-28.4142
0.130629	-9.48044		-4.41239	-36.9983		-12.0987	-0.394483		-5.85776	-26.5179
-3.4383	-7.31437		-4.75828	-32.9472		-7.56848	4.49486		4.83487	-22.7117
-2.68424	0.938696		-2.1739	-28.2369		-15.1831	-0.816834		-7.4866	-18.1735
-3.1618	-10.2228		-1.50952	-47.5089		-11.1771	-7.11399		-2.76642	-7.54794
-1.93127	-6.55382		-2.18349	-46.6959		-12.5255	-13.6418		1.95938	5.42511
-2.41213	-4.69245		-3.46771	-46.1838		-12.6438	-8.62866		-2.22615	-3.8731
-4.51356	-2.76586		-2.87805	-36.449		-13.3637	-1.52409		1.28434	-14.103
-0.178572	-4.36887		-3.05687	-36.67		-6.2459	-5.07848		-4.50189	-5.52152
-2.32047	1.44995		-0.840786	-34.6453		-9.63112	1.48888		0.19061	4.58045
-4.87319	-1.06781		-6.95806	-12.8518		-5.99124	-2.99889		-4.17828	7.68795
-2.45871	-1.74125		-1.07197	-25.336		-10.3955	-6.66956		-9.55423	0.723203
0.210399	-3.88633		-0.668345	-37.7558		-7.54375	2.39993		-3.75854	-0.802182
1.73327	0.589746		-4.28356	-39.258		-10.4131	3.42293		-1.27794	3.60793
2.18511	-2.97675		2.4868	-18.0522		-15.318	-2.99713		-5.02274	-1.53492
-1.98348	-5.67577		5.79849	-26.9705		-14.7975	-4.40539		-2.92829	1.3694
-3.11721	1.55958		1.69634	-17.8999		-11.4063	3.69898		2.19458	6.04685
1.70171	-0.688906		1.58916	-30.0299		-12.1102	4.44921		0.541226	-3.07148
0.409231	2.48546		-2.08905	-39.3665		-15.4984	-1.48061		3.50437	-1.99815
-3.44403	-0.743952		-1.17628	-42.7533		-14.2227	-1.67823		-1.22353	7.04705
-1.67599	0.680067		-1.78535	-36.31		-15.5102	-6.41167		5.07266	-4.79492
-4.04383	-6.5765		0.981974	-42.4161		-10.1599	-2.08677		1.37911	-12.3523
3.60643	-6.58062		-1.89669	-24.0947		-10.0233	1.50327		3.37179	-10.0171
2.28455	-2.32779		-2.86608	-32.8484		-11.2559	3.40184		-6.50739	0.50595
2.45614	0.0216229		3.87273	-33.0256		-10.7625	-2.45228		2.8156	-7.55132
2.43059	-3.89333		4.35587	-32.5324		-11.65	-6.73586		-1.10798	-5.95337
3.26045	-10.5256		1.27834	-38.3207		-8.57007	-3.58727		-14.219	-0.680447
-0.332397	-4.06677		0.218966	-45.9886		-12.1427	-3.71368		-2.76991	-24.8299
1.66331	-9.68944		-2.74663	3.50946		-9.90499	1.54793		-2.54453	2.19978
1.68948	-9.18937		-0.739943	-12.8686		-10.4657	4.69007		4.39658	10.037
3.2122	-5.53927		-0.918543	-5.77072		-12.9857	4.31156		1.68175	2.20945
-1.81378	-4.80811		-3.09024	-1.57052		-10.1846	-1.04832		5.30131	-3.58471
-2.71933	-2.3647		-3.55089	-7.03876		-16.1976	10.3837		2.16444	5.77873
1.98934	-3.24337		0.835906	-18.8574		-8.58921	1.46099		4.89482	-0.620014
0.477017	-6.43005		-2.9717	0.9262		-7.42459	7.07661		3.33563	0.725198
-1.49672	-5.48984		-4.72064	-19.81		-9.13447	6.65221		4.91952	0.776563
-3.43479	-4.1493		-1.34349	-19.4685		-13.6431	0.273322		-1.4449	2.07327
-1.76165	-9.89658		-5.87054	-4.10728		-13.5764	0.182993		-3.44409	-3.7891
-1.91759	-4.6029		-3.97796	-26.515		-12.8714	-5.56322		4.46675	-20.7564
1.11063	-5.75814		-3.10054	-29.4717		-10.1587	8.29037		-4.42005	-7.02663
3.21501	2.96573		-4.78988	-14.2814		-13.9669	1.16523		-4.55861	-6.97016
-2.1977	-6.06732		-2.26853	-30.8963		-14.4551	-3.36114		2.5168	-12.6263
-3.3036	-10.64		-7.17016	-24.7732		-11.7484	-10.0011		-1.48102	1.01071
-5.97736	-7.92263		-3.34393	-45.2192		-17.1167	2.3265		-8.73311	-10.298
-8.65098	-3.39056		-5.17172	-37.5666		-6.61524	3.43318		-13.8096	-4.11922
-6.93891	-6.97097		0.149652	-23.7688		-7.66357	-1.87176		-4.46496	-29.2419
-7.24257	-2.11931		-7.37568	-5.69518		-9.01699	-2.32989		2.20235	-24.873
-1.60587	-10.0859		-4.98869	-10.3287		-7.63244	2.61268		-9.06506	-17.7324
-3.03527	-11.4778		-2.54421	-13.9178		-10.5982	3.78649		-5.15744	-19.5971
-1.951	-8.94045		-0.366116	-21.798		-14.5773	8.14994		-8.28168	-19.6923
1.93513	-5.29097		-4.63918	-8.33062		-12.5742	2.58068		-4.24415	-29.2973
0.256275	-7.59164		-5.21087	-7.85274		-11.3677	5.97528		-5.78043	-31.8852
0.127471	-2.3393		-10.6621	1.03988		-9.8948	-22.0302		-18.0587	-19.5322
-4.66134	-4.61129		3.59129	-23.825		-13.5519	-6.76677		-9.4512	-11.2487
-2.38138	-6.95115		4.45066	-11.3206		-16.0786	1.75358		-9.40737	1.931
-0.53564	-5.66102		1.09284	-12.6602		-16.2398	-5.1311		-6.98636	-9.83683
-2.76978	-5.43761		-1.76669	-35.7776		-14.2043	2.85972		-5.51488	-9.59939
-4.3068	-6.54834		-2.99331	-16.5202		-16.0893	-4.48142		-9.83322	-14.9339
-1.45173	-10.2739		0.0123909	-4.74459		-15.9697	-5.07898		0.441228	-12.7364
-2.04733	-9.58285		-1.72489	-28.6538		-18.6472	-4.00038		-4.71742	-2.87271
3.72595	-8.08857		-3.12397	-30.4641		-7.98362	2.4249		-3.58808	-22.4905
1.33703	-4.13209		-5.80427	-21.7102		-7.39933	-5.24681		-4.00912	-10.2814
-0.241677	-8.52933		-8.43284	-4.41633		-6.24819	-4.46359		-2.49545	-15.3793
-3.21225	-1.76646		-5.91784	-31.8351		-11.2325	0.9181		-2.66892	5.3645
-2.02409	-3.00394		-2.96618	-35.4788		-6.71403	1.73428		-4.52997	0.875603
0.797007	-4.09758		-8.62822	-20.1559		-9.99153	-0.817905		-10.3975	-5.58066
0.150778	-1.80667		-1.15187	-7.62334		-7.0712	-1.27592		-14.1311	-8.63032
-4.08339	-3.75361		-3.69736	-26.1317		-10.9816	1.17786		-15.9139	-24.0864
-4.27662	1.49273		-8.08197	-6.90919		-10.8406	1.0603		-9.41121	-11.8276
0.0213211	-2.5915		-4.35058	-26.9136		-12.7166	4.80492		-10.4054	-8.75441
0.674233	-5.31724		-4.99236	-37.128		-12.791	3.80589		-9.14425	-20.9652
-0.749742	-8.11898		-2.04764	-25.9164		-15.3215	1.43439		-1.10072	-16.8229
-1.2598	-13.0605		-6.45432	-27.1487		-18.9578	-6.12052		2.07954	-27.3759
-2.18257	-3.20727		-5.65371	-25.4841		-17.8276	-8.38076		-1.85415	-17.263
-6.68068	-3.95138		-5.96307	-20.1161		-11.9246	-3.15225		-7.14306	-6.35743
1.10724	-4.6765		-7.49823	-6.69305		-11.4949	-2.02207		-6.56348	-2.76035
1.87478	7.19288		-12.7099	2.92013		-15.7965	10.2107		-4.19232	-1.32108
1.04561	-3.21433		-7.10183	-10.4548		-16.9317	-3.52643		4.98893	-18.6223
2.38902	-8.32187		-4.52213	-30.1101		-11.7161	-2.16832		-0.497101	-17.5568
1.12687	1.78626		-6.61937	-16.6508		-9.26307	-2.68757		-2.12711	-20.0662
5.51454	0.659302		-3.24424	-27.1196		-11.1628	-2.23682		-4.1917	-5.4091
7.25311	-1.12249		-10.6249	-1.99349		-11.9214	2.04219		2.93954	5.11729
4.8094	-3.34205		-8.25066	-1.07056		-7.64486	-1.73197		-3.74161	0.100414
-2.41702	-11.7434		-6.83965	-20.4343		-12.5215	1.61491		-0.795697	-14.587
-2.92533	-14.0487		-4.91798	-13.4953		-13.1881	2.03669		-7.57276	-10.2876
1.34959	-4.3498		-13.3262	3.48952		-10.1972	-0.14796		-6.86972	-9.04677
3.53921	-1.64066		-6.61933	-37.4185		-13.1624	-7.17118		-6.16548	-18.8362
-1.66955	-2.85336		-4.99147	-34.9133		-14.4726	2.31836		-5.88882	6.33942
0.372053	-1.16305		-3.72806	-19.8999		-11.438	8.14366		3.63024	6.15709
-2.0742	-7.41923		-4.31353	-15.4308		-11.0262	2.66866		1.8687	4.68754
1.51382	-9.24983		-4.14525	-19.2127		-10.742	1.12172		5.58568	6.25803
2.39287	-14.0481		-4.2278	-13.7624		-14.3381	2.73904		3.08404	3.3358
-0.809105	-7.25558		-2.71469	-22.2672		-10.5154	-5.20957		-2.40637	-19.3909
1.66513	-9.76295		-6.52686	-27.9899		-12.7429	-10.8637		-4.30593	-17.4671
-2.31854	2.38675		-5.39096	-21.3723		-8.48785	-8.95785		4.27707	-1.80737
2.14426	1.99345		-11.4848	-3.03373		-11.8648	-13.6531		1.4952	-5.75529
-4.73359	-5.72136		-12.3983	1.55468		-13.672	-9.43011		-3.45847	-11.0455
-1.90556	-4.28191		-16.5104	4.04855		-8.03016	-1.80552		-6.48837	-9.77835
3.32949	-3.37006		-16.308	1.46084		-7.93383	-2.38668		-1.35201	-15.6721
3.49648	-5.95113		-10.8593	3.2709		-9.00065	-8.6792		7.75434	2.90902
-1.58685	-6.75073		-9.25564	-7.6881		-11.7257	0.200277		-6.33552	-1.78497
-1.22958	-1.17312		-6.68097	-26.3331		-13.6137	-6.80662		-8.92707	-8.62475
-4.8409	0.154374		-9.88842	-20.9209		-14.1337	-6.54123		-14.4802	-9.44401
-0.142505	-5.41433		-9.10844	-28.5818		-9.07483	4.63533		-5.74814	-21.3126
-3.41795	-5.07089		-7.35335	2.56755		-11.7341	6.36171		0.132219	-12.1884
-1.41353	-6.5715		-4.29816	-7.57018		-9.92196	6.16089		-0.7639	-1.61685
-4.45255	-4.45186		-3.92487	-23.8845		-7.45199	1.72968		1.14582	-16.3933
1.41233	-5.67898		-6.77958	-6.28112		-5.66099	-2.19932		-3.83014	-23.0584
0.740025	-4.6772		-9.91793	2.47368		-6.21463	-3.00097		-7.0618	-26.2783
-4.47342	-4.64595		-3.58518	-7.71735		-5.30659	-10.9307		-3.61877	-15.6034
-1.31813	-8.56056		-4.47521	-1.18108		-2.01678	-2.31853		8.38108	-19.8641
0.0265406	-8.61527		-1.08648	-11.8206		-8.00752	2.14292		0.827403	-30.0303
1.23294	-1.58891		-1.26823	-0.586637		-9.18261	-1.71317		-7.68499	-20.5627
-1.34489	-14.1021		-8.90787	-5.88627		-8.95332	-3.25712		-2.55532	-27.0689
-1.24052	-10.178		-6.27499	0.33692		-12.622	-5.76585		6.25259	-21.3476
1.0946	-12.5311		-8.7287	-16.2879		-14.4493	-1.50589		3.75835	-16.7735
-2.42014	-2.15561		-7.17292	-0.683634		-11.9544	0.100501		4.76247	-10.6215
-1.62181	-8.58431		-9.17113	-9.04706		-12.9531	-2.13509		-1.60637	-9.00445
-3.88256	-7.66167		-4.82542	-8.36261		-16.0639	-5.15383		-12.4796	-23.9179
-2.53085	-10.6204		-10.927	-2.50036		-19.3283	-8.14947		-4.68088	-21.5723
0.685205	-8.99484					-19.2172	-4.2009		-1.57223	-12.3776
-1.64926	-5.29268					-16.7183	-3.96021		-4.74936	2.61706
-2.94021	-4.24334					-15.9666	4.78121		-10.0276	-6.45304
-1.11441	-5.17042					-11.9097	9.96305		-5.26087	-8.705
3.75386	-5.13828					-17.0584	9.23276		-4.88483	-0.0891274
6.63083	-4.95159					-18.9615	4.63062		0.972057	-11.5564
-2.36384	-2.89401					-13.8572	3.48623		7.65303	-7.02498
-0.520157	-1.63503					-9.17353	-6.98071		2.44133	-15.6955
-1.05278	-3.61746					-6.76917	2.58347		4.39351	-4.89509
-1.60288	-2.72754					-5.70126	-18.5568		-0.57559	-22.5491
-0.103407	-1.58489					-8.91526	9.59952		-9.61881	-21.6463
1.04241	-2.4035					-13.9633	5.03379		-7.94868	-9.98525
2.73648	0.0197831					-20.1576	-2.52748		-0.480705	-28.4925
-1.77287	-2.52623					-18.3718	-1.75864		-5.20953	-33.787
0.576733	-5.05387					-19.6583	-5.45321		-7.1602	-26.5344
2.89124	-5.42718					-18.8784	-0.56193		-7.20698	-22.8306
-1.96262	-6.70194					-17.5915	6.67038		-13.8257	-3.10548
-4.29801	-9.65064					-18.8927	2.63952		-5.2218	-28.6915
1.23536	-6.96879					-9.68364	13.278		-1.25624	-15.736
2.83449	-6.0595					-12.4105	-0.276566		-3.15134	-32.2309
1.83245	-9.88198					-9.00351	5.12728		1.07677	-10.2472
2.6512	-9.28908					-13.2746	8.83735		-2.47263	2.52682
-4.00979	-5.51784					-9.26318	6.04808		-1.74565	-1.19464
-0.356596	-7.66144					-13.8207	-7.36286		5.07936	-6.50406
4.94259	-3.88773					-8.88445	-4.40545		-2.81134	-32.7492
2.66513	-8.05108					-13.3516	-3.86502		-10.9373	-32.903
0.291602	-9.72106					-11.4639	-3.09056		-6.8729	-23.4057
0.713104	-9.00153					-20.9517	2.14994		-2.36789	-5.98418
1.504	-5.1855					-12.9712	6.45141		-1.14672	-15.9606
0.269676	-2.92281					-13.2007	4.13771		-11.3372	-12.5243
-0.209621	-3.14669					-13.2299	6.49655		-11.7829	-23.7393
-2.00986	-0.902259					-10.0024	4.24386		-6.61354	-20.9504
-1.58953	-0.895151					-15.4469	6.45866		-4.44777	-19.3487
-0.363082	-4.29385					-11.7978	7.34774		-3.95121	-26.8539
-4.02003	-11.0049					-11.2931	4.29066		2.85637	-25.66
-4.30954	-12.2877					-15.7871	8.74699		-5.60327	-19.4071
-4.85459	-4.69649					-14.7301	7.39733		-3.9427	-12.2126
-2.93593	-5.59428					-14.9346	9.07339		-5.33361	-18.8693
-4.10766	-5.46441					-14.5848	4.25791		-5.76756	-19.363
-4.54199	-6.01128					-18.5932	-8.74818		-5.49898	-15.5651
-0.000434238	-0.3196					-18.9299	6.60046		1.23907	-19.71
-1.05729	-0.916071					-14.3382	5.47288		3.97969	-26.0199
-0.261062	-2.87893					-10.5766	4.34275		-1.6921	-12.1965
1.53343	-5.29305					-8.51528	6.4244		1.38857	-12.9374
0.172514	-0.845947					-5.66091	0.655372		-0.798853	-10.8084
1.82051	-6.01944					-7.8445	1.47252		6.11551	-1.2556
0.663878	-9.62869					-11.6201	0.572131		-9.99207	-28.9081
3.09273	-5.60256					-6.66598	7.38772		0.938764	-18.6564
2.49154	-6.48821					-7.7756	-1.70153		-17.9713	-4.23385
4.79155	1.26525					-7.21586	2.70062		-14.2593	-6.02018
3.34499	-1.00869					-8.35327	3.9864		-18.2362	-2.96697
2.62583	-2.19671					-5.61739	-0.23682		-14.7365	1.16747
0.822623	0.522601					-4.90554	4.52254		-5.65108	-5.71825
-3.23731	-5.14184					-4.20436	2.23064		-13.7885	-10.2582
-2.6248	-0.572					-7.96716	0.326019		-13.2394	-17.0059
0.369412	-4.65375					-9.1444	12.6351		-2.13268	-19.4931
-2.33421	-7.16569					-10.8048	1.45401		-6.92605	-18.0787
-3.87963	-2.65959					-1.4273	-27.9875		-4.13821	-9.73347
-1.79043	-3.70686					-9.91884	3.16015		-8.08267	-7.32873
-0.45462	-5.90481					-18.2822	-5.85842		5.40604	-11.9693
-1.9841	-4.29149					-16.1493	-2.89556		-3.48861	-16.5703
-3.48746	-6.58752					-18.2198	9.04052		-3.52319	-15.5391
-0.862158	5.06077					-11.0773	4.43076		-3.57094	-6.95733
-0.863033	-5.90307					-8.2426	5.66324		-9.0419	-23.914
-0.834958	-3.96296					-7.4394	4.10964		-4.65813	-26.4777
2.38781	-4.96722					-7.53863	3.51755		-15.5249	-13.7348
-3.9489	-2.14443					-11.0226	0.755199		-3.8169	-15.3964
1.47039	-5.57234					-10.0796	0.276677		-5.9665	-26.4456
1.65905	-1.30112					-11.2477	4.46682		0.771737	-26.2959
0.258162	0.76178					-12.3395	6.51758		0.985215	-8.8226
2.52255	-1.53283					-15.752	5.60567		-0.441326	-12.7608
1.61288	3.14364					-13.3014	12.5803		-8.12193	-6.9844
0.360649	4.76041					-12.5909	8.18927		-5.45187	-22.4351
-3.00041	-5.33075					-11.1763	4.98291		-0.476209	-30.876
-1.23711	-7.43877					-18.8204	-0.679042		-0.505884	-8.19576
-1.55746	-4.02076					-15.7366	-3.06064		4.07265	-16.2999
-1.69252	-8.20259					-12.7072	-0.651752		2.57433	-25.1635
0.675091	-8.20394					-11.0294	7.79753		-10.8201	-15.4206
-1.26933	1.52651					-7.56211	1.94277		-10.7325	-15.31
-0.00311962	0.587233					-9.51379	4.70706		-2.44617	-3.3745
0.00685795	-7.72688					-16.8771	-0.593133		0.17918	-3.2644
-5.02603	-3.55473					-16.6465	1.95919		-1.35676	-6.98673
-4.17314	3.62827					-14.5796	8.06343		1.07938	-11.4584
-4.23313	-4.64573					-13.6935	9.95634		-2.1727	1.95962
-3.04412	-0.616671					-14.1548	11.964		2.03401	-15.3399
-1.61557	-3.36458					-9.96312	10.194		-9.80901	-24.6141
2.52602	-3.5533					-11.4185	9.3513		1.5985	-25.7135
3.3	-1.52733					-11.3376	7.36913		-8.5887	-11.2076
3.28141	-1.67927					-16.5161	12.0691		-1.77619	-6.93591
1.14691	0.272188					-12.5468	11.9755		-10.1161	-19.4293
1.30014	-6.89452					-9.99109	10.1571		4.45211	-20.3097
-0.662843	1.22156					-13.9152	13.5755		-5.52154	-25.903
2.30442	-3.80225					-11.373	5.10771		1.13214	-22.1003
-2.35284	-1.06257					-12.172	11.231		0.195992	-26.4579
-3.67014	1.27132					-15.6599	9.21974		2.83278	-22.9442
-1.7361	-4.05251					-14.4194	3.75969		4.03096	-21.6178
0.520724	-8.02452					-16.7462	4.87635		-12.2361	-12.8509
-5.33238	-9.74138					-15.7393	14.7462		-11.5707	-13.0147
-6.42109	-10.2931					-12.0572	9.12828		-12.4552	-8.01729
-2.11309	-2.62766					-3.34976	8.9138		-14.6909	-15.1005
-2.95851	-1.51926					-11.1692	9.05195		0.828506	-30.2446
-1.5687	-4.56881					-9.99067	6.94644		-5.60077	-28.4943
-2.5416	-2.18171					-7.97077	3.49309		-2.13051	-22.719
0.132595	3.40332					-10.2606	6.46434		-3.83685	-27.7176
3.91537	-1.57794					-10.1003	8.94263		-3.14643	-32.0378
1.94737	2.02463					-9.58872	9.74553		-6.24506	-16.4974
-0.332256	-0.642233					-11.1059	7.44752		-10.6266	-14.3855
-5.33615	2.10625					-13.7648	8.09006		-2.50931	-18.8741
-2.25281	-7.38103					-13.6601	4.81136		1.5951	-13.7096
-0.130339	-3.45528					-17.4353	5.85521		-1.86189	-19.6485
6.25947	-3.21508					-20.1673	-1.57985		0.301167	-22.3522
3.67749	3.35176					-19.3127	-5.35361		-1.48582	-25.5931
-0.333888	-7.09309					-15.571	-1.40437		0.355796	-12.8526
-3.39411	-5.68387					-12.9854	10.5214		-10.5656	-8.70234
-3.56955	-6.51239					-13.2517	7.28897		-14.1825	-7.67444
-1.93376	-2.65319					-17.2785	6.1669		-13.6335	-7.93339
-0.410323	-5.3683					-17.1569	0.5796		-0.240858	-7.58543
0.811596	-1.91813					-14.5702	3.84412		-6.06508	-20.1155
-0.603966	-0.157626					-15.2936	-6.18185		4.93236	-16.3066
-5.58837	-13.4697					-16.4421	-3.8576		4.65168	-33.083
-3.25966	-5.92031					-20.5184	-5.11159		-10.2735	-12.0236
-4.41036	6.51164					-13.0729	5.30537		-2.81646	-1.29918
-5.64196	0.221734					-17.1936	7.44968		-1.44996	0.597906
-2.03683	-0.842126					-9.52287	5.51336		-4.00585	-1.22158
4.82628	0.404127					-11.4349	-3.06372		7.12606	-14.6765
3.33801	-3.68493					-13.5885	-5.76859		5.19864	-6.66664
-1.72137	-7.0144					-13.8642	7.36664		5.76156	-11.8753
-3.38603	-2.71196					-14.4281	7.9991		5.77614	2.43094
-0.716798	-3.78526					-13.1315	10.4188		-3.35693	-3.57717
1.60543	-6.35847					-11.0085	11.808		-7.54706	-10.8383
0.114919	0.570249					-6.73252	1.61295		-7.92632	-15.7843
-1.77116	-0.0636926					-6.05759	4.59302		-0.426247	-14.2056
-0.521454	-1.8077					-11.8674	4.18172		-6.6569	-2.05035
-0.0673573	1.01627					-5.85624	2.97396		-11.4842	-4.83192
-4.90482	-1.53883					-10.5271	9.57869		-1.25373	-12.3982
-2.5611	-6.06135					-15.5487	-4.04988		-0.116719	1.35361
-5.47038	-5.57797					-16.096	-5.7956		-6.78417	7.06378
-5.4606	-3.90816					-7.772	-0.838413		-7.70432	-1.28408
-1.27433	-5.17674					-7.10928	3.54195		1.53445	-9.13246
-3.35396	-6.51145					-8.336	1.69755		0.191282	-15.4188
-0.665889	-8.63614					-10.5928	8.86097		-0.872879	-3.89703
-6.28926	-4.17771					-13.2356	9.26651		-1.14598	-11.4962
-2.85036	-1.67792					-13.6992	10.1025		-6.59678	-33.5508
-1.15078	-4.05884					-5.43792	3.90353		-1.76521	-16.4383
2.22997	-1.70621					-10.3435	5.97182		-3.29287	-17.9959
-1.82593	-5.44782					-7.02327	-2.16124		-15.3812	-16.0851
2.44534	-5.09431					-10.5688	-1.85973		-15.245	-9.94343
-0.495779	-2.95986					-10.2561	-5.65338		-20.9151	-9.66585
1.4572	0.439835					-8.09145	-1.19984		-11.2772	-20.8605
-4.23194	-3.59231					-8.7221	4.5391		-2.13739	-28.1195
-7.14575	-3.18812					-10.1884	4.18643		-4.06155	-26.8846
-4.06093	2.20781					-10.5761	3.77756		-8.52724	-19.4099
-5.18654	1.17643					-11.0442	-1.20093		-4.20827	-10.5204
-0.231665	3.54299					-12.6302	-1.10134		-2.95395	3.37039
-1.10767	-2.63138					-9.01071	4.47554		2.80872	-2.57505
-3.79449	-2.07203					-12.5182	-0.794064		0.373259	1.43252
-7.56744	-3.72777					-8.70208	-1.04681		-6.1013	-3.22636
-3.30917	-0.6189					-10.8694	6.14142		0.290029	-12.234
-5.30894	-7.71127					-9.98058	-9.79145		-3.64907	-7.55977
-4.7237	-7.48787					-11.8124	0.463759		5.85037	-11.0757
-2.87302	-10.4261					-8.14038	-2.57338		-7.24382	-2.25859
-4.73664	-7.34162					-14.3903	-24.194		-2.69251	-7.77862
-2.24555	-10.5175					-14.1095	-5.9948		-1.20208	-10.4959
1.50859	-7.1236					-15.8646	-0.148099		-3.51216	-17.2787
-3.41723	-4.40049					-9.42072	4.77847		1.17842	-13.156
-1.53058	-5.0197					-13.6491	6.72244		5.15746	-1.61248
-4.93884	-5.08206					-12.0367	9.24818		2.86024	-21.1324
-1.31273	0.528474					-11.0876	2.38712		-1.90603	-9.0617
-5.37027	-7.16082					-14.6292	11.3148		0.911059	-17.2776
-5.67357	-5.49854					-12.8039	4.33466		-0.0135671	3.28101
-4.69429	-0.640412					-13.4441	6.27627		0.537538	-15.9227
1.0911	-1.01287					-15.3565	12.3992		1.8716	-26.4788
0.816371	-2.95034					-15.6374	7.02347		-13.446	-8.85897
-0.253966	-4.81143					-13.6736	4.77338		-13.7487	-10.2015
4.02327	-9.10663					-18.0309	5.74663		-5.45717	-4.80795
2.88362	-5.67456					-16.3517	5.32732		-1.15406	-4.84372
-2.22867	-3.76003					-18.6149	5.43131		-9.54055	2.78926
2.75794	0.161046					-16.1808	5.65245		-5.29027	-4.26028
1.97495	3.83815					-15.0683	2.55303		3.0408	-4.4892
0.409875	1.52389					-16.5794	10.5229		-0.0596326	-17.3771
0.176157	3.58583					-17.9713	5.99242		-4.73035	-0.590464
2.18528	0.975943					-19.2452	-0.782546		-3.98168	3.67337
-1.92921	-0.992148					-15.4775	5.92138		-7.87894	-6.96165
-0.730233	2.55765					-11.8454	-2.15775		-1.10701	-10.2552
-3.35421	0.675506					-16.7392	4.73642		-5.55374	1.87413
2.67292	0.663036					-20.9675	-2.96689		-3.75809	0.888798
3.38711	-3.10282					-16.8439	-0.301855		-5.92132	-11.7539
1.27739	-5.89039					-19.047	-5.12731		3.35372	-20.8506
4.40405	-6.94797					-16.913	-3.16696		1.40572	-25.1436
1.52728	-4.19661					-20.5669	-2.42156		-4.43497	-18.0738
0.615535	-2.19199					-14.7586	0.273819		-6.41692	2.67073
1.15421	-4.06673					-15.8387	2.77466		-1.42499	1.6214
-1.42605	-4.92109					-19.3942	3.59142		-5.2292	-18.3113
0.798956	-5.59032					-17.6975	5.9231		5.89007	-21.5844
2.40016	-0.415814					-14.7581	8.36794		-5.53939	-2.91315
0.159051	-7.08999					-19.072	-0.763774		-4.52055	3.04701
-4.4343	-4.11832					-15.592	0.90726		1.04549	-5.25557
-1.75643	-5.38171					-15.5559	7.63457		5.83132	-17.5623
3.01657	-2.91954					-17.914	9.74388		-2.04477	-9.04335
2.52816	-3.75525					-11.3627	9.79425		-7.22701	-23.9284
-1.16662	-0.480955					-11.0228	9.02188		-13.6773	-19.6844
-0.00339335	-2.52576					-14.0838	6.74728		-13.7594	-28.2101
-1.38847	-1.16481					-18.6841	13.9515		-9.99586	-29.7025
1.32722	0.193844					-16.1422	10.3803		-1.46621	-18.3933
-2.67737	-0.367413					-12.9307	9.61087		-3.29638	-6.80998
-4.16457	1.74912					-14.8471	1.63259		7.32683	-6.4935
-1.18063	-0.449134					-10.505	5.46595		2.73509	-4.23278
-3.16061	0.37702					-11.6714	1.44128		-6.98617	-19.2848
-2.12313	-2.15104					-9.97557	3.26853		-12.2466	-24.4024
4.05276	-8.75503					-14.7855	7.20475		-11.2656	-14.9804
0.655057	-7.1442					-9.24446	4.30683		-10.0546	-23.0533
-3.00127	-9.95197					-19.6625	14.1992		-4.66946	-31.0716
2.49664	-4.31978					-14.8561	13.2243		-10.1801	-19.3676
-1.98393	-2.67455					-15.1357	8.77125		-4.9832	3.27691
3.13783	-0.701695					-14.8488	4.35232		-8.89258	0.1956
-1.54597	-0.394599					-16.0642	4.48847		-10.6938	11.8684
2.29665	-2.90825					-14.3719	4.30042		-15.7206	10.8977
1.43688	0.0193207					-18.8429	7.25925		-9.51115	-1.63095
0.757957	-0.0788739					-16.6109	11.6204		-1.70523	-1.69186
1.2278	3.34554					-12.959	7.41708		-5.53101	-0.0625447
2.63972	3.10769					-13.4003	2.81703		-8.44021	4.55833
4.93716	-6.43705					-11.998	7.24267		-5.73286	15.2559
4.44052	-1.15519					-19.6958	-2.02644		-0.680521	5.64213
-2.39254	-4.23266					-21.0679	-3.00609		-4.77391	-0.0385694
0.033695	-10.543					-17.6838	-6.86276		-3.57131	-12.0098
0.845643	-1.30708					-14.1321	-4.28715		-8.57355	-10.0723
4.96413	1.03508					-13.7219	9.33076		-2.2763	8.19867
4.84312	-3.91295					-17.7531	8.173		-0.891253	-3.32139
4.22072	2.14243					-17.1347	10.912		-6.05849	-4.86188
2.16712	1.32197					-12.6508	11.1066		-5.40692	-16.3353
2.20969	-4.16768					-13.2784	6.81221		-1.36141	-18.0511
2.22729	1.62384					-15.2422	-6.65868		-3.04243	-26.2256
-1.66336	2.85616					-21.0531	-1.90654		-12.8725	-24.4598
1.45403	2.12125					-18.5951	-6.55563		-10.178	-22.8169
2.31323	-2.79714					-17.2156	-0.27336		-7.90687	-19.8353
-3.33322	2.77822					-14.9632	1.2396		3.67514	-16.5212
-1.2627	-2.62426					-19.4785	-4.85577		3.21959	-24.7425
-1.30868	2.61732					-12.6506	4.67844		-11.3931	-20.9389
-2.07072	4.65109					-9.421	4.43025		-7.24664	-12.9484
-0.840383	3.81225					-11.9568	11.6194		-15.9029	-1.55328
-2.51399	3.1722					-14.5416	10.3586		-15.4592	-10.9468
0.0895756	-1.96428					-12.6231	15.9545		-3.67169	-23.5013
1.75332	2.28979					-13.6169	15.9529		-5.202	-25.0258
-1.18232	3.87168					-16.0625	8.12143		-2.95497	-15.4024
1.57188	0.648085					-12.6957	6.2784		-7.15828	-3.44198
0.963529	0.772268					-6.05299	-3.2051		-2.86292	0.914111
-1.27468	1.41554					-8.34648	8.94015		-4.65974	7.81056
1.30084	-3.53319					-10.022	5.56197		-11.3907	7.5656
-2.10709	0.827194					-19.3266	-1.38574		-13.448	8.94932
-4.28603	-1.00355					-10.6748	-15.0519		-1.79508	-11.8324
1.30884	0.962516					-16.6187	-5.81519		-3.77644	-5.4618
-1.9289	0.22032					-14.6711	4.5436		-11.1912	-12.9178
1.41393	3.2054					-14.6977	-0.761302		-6.42095	0.236516
-0.707379	3.31618					-16.6178	8.25013		4.44762	-25.5036
-4.71578	1.24449					-16.2271	3.79482		-1.72983	-21.4747
-2.28098	5.01824					-11.6819	3.1193		-2.42179	-29.351
-0.20322	2.30481					-18.3512	5.98069		-0.332852	-13.9419
1.00537	-1.31716					-15.4875	8.899		0.307169	-13.3325
0.243269	-4.58828					-17.2203	1.40834		-3.42354	-12.8472
-0.381135	1.57648					-12.2883	5.06676		-8.70346	-0.603592
1.26544	0.0300007					-12.6301	3.02205		-12.452	-12.3059
6.66447	-2.8877					-10.3617	-0.766063		-4.08705	5.85736
3.54162	-3.91686					-12.0992	3.50521		-9.95615	-9.19271
3.8366	-3.81543					-11.4124	5.63027		-4.50228	-17.8262
5.27699	-8.72791					-10.2103	2.8361		-3.02131	-11.4853
1.11768	-3.38702					-11.5627	-9.01448		-7.94452	-6.24854
-2.31022	-4.50739					-18.8694	-8.73135		0.235167	-7.42586
0.232959	-10.4752					-18.1042	-6.67892		-7.4393	-16.8623
1.34025	-8.45969					-17.2722	5.43479		-10.2045	-4.02217
4.66589	-7.39455					-15.1142	4.90502		0.828274	-5.4177
1.93568	-7.94769					-16.9061	6.69689		-6.75388	-20.2955
2.32826	-1.33561					-20.3251	0.0943939		-9.72756	-15.2866
3.41086	1.00379					-16.3133	6.14199		-5.49186	-20.3182
3.12449	-4.37732					-15.4078	6.12108		-11.7072	-13.4915
0.821874	-2.01732					-10.3577	-6.65959		-4.61807	-7.61571
2.5713	-0.132023					-8.47037	0.35666		-16.1487	-8.28137
0.88648	-1.85977					-12.2653	7.84992		-5.03844	-7.12772
1.52475	-3.12954					-9.77452	4.08005		-0.421148	-10.2571
-2.19875	-1.84149					-10.7307	-2.26753		-4.00186	2.80102
2.46274	-7.02146					-9.80469	0.50778		-2.73224	1.79933
1.57848	-6.19456					-6.91753	-0.322562		2.94057	-1.46913
0.0736705	1.34274					-9.13997	-5.78241		-0.579133	-11.5189
-2.2523	4.93857					-10.0711	-3.78232		-1.99314	-28.2866
-1.12609	-0.691881					-14.9115	-9.97666		-12.6748	-15.5113
1.68194	-5.34682					-8.82653	0.0901578		-5.64536	-11.2347
3.50586	-0.18655					-9.70867	-6.15736		-4.92327	-17.1898
4.85776	6.74109					-13.2783	-4.57166		-13.89	-14.2165
2.52565	0.162489					-17.6158	-9.76167		-4.79829	-12.7955
3.29634	2.60485					-15.0711	-5.62838		-9.09023	-8.43789
4.1433	0.615828					-2.6705	-5.89059		-5.18123	1.77137
-2.79161	-2.10286					-6.14142	-4.68709		0.503882	-8.9685
-4.51577	-2.2004					-10.8229	-4.04941		1.81067	-2.96365
-4.64649	-3.52438					-7.84587	-6.55184		0.611918	-7.76969
-5.24578	-3.40876					-8.76723	1.93864		-0.963958	-7.7938
-4.81471	2.74717					-11.6273	-1.52412		-6.47204	8.2504
-7.54508	1.98991					-10.4349	2.99175		-10.3571	-3.02674
-1.59096	-5.13432					-17.7547	5.15146		-7.07918	-10.2277
-0.0928645	-0.0601126					-12.8182	1.78721		-4.39485	-16.5796
0.51214	2.40684					-13.5959	0.220808		-5.52491	-11.9342
1.99257	-5.23471					-19.4961	3.93302		-8.08325	-22.7041
-3.31515	-5.09314					-13.503	-7.28996		-7.6787	-21.5584
-0.981087	-2.1699					-14.5401	-20.5437		-4.03909	-27.4062
1.70444	1.87795					-17.2292	-6.37146		-1.58687	-29.3547
-0.809606	-4.72228					-13.4072	0.893153		2.26334	-27.2652
0.105556	-3.54231					-8.3328	4.72387		-14.5205	-20.4157
0.0354224	-2.30318					-1.18806	-1.88041		-4.63611	-17.0733
-0.472256	-4.57544					-4.16229	1.99118		-3.73864	-4.58485
-0.502292	-6.9175					-5.47991	-1.56381		-8.00569	-18.5196
-3.67408	0.30553					-14.638	-0.497341		2.05869	-25.9127
-2.53727	-1.64113					-15.8658	-9.68619		-5.64409	-12.4927
0.0346088	-1.69519					-14.8843	1.54539		-11.6414	-18.3333
-5.24654	2.05249					-17.5186	7.9098		-8.43093	-35.2009
-0.714645	-2.45877					-15.6546	9.65473		-11.0839	-24.1002
-4.77449	0.362691					-11.2891	6.49742		3.79816	-30.1505
-5.32323	-6.86067					-11.6742	-4.52962		3.51506	-30.6113
-2.02062	-7.4835					-6.95269	1.29495		-0.532141	7.99226
0.225239	-5.03509					-9.91578	1.10107		-5.04787	10.645
0.136795	-6.64177					-10.1064	1.57936		-5.30766	1.03596
-2.34239	-2.16344					-8.07166	-0.736188		-7.47064	-14.2304
0.583614	-1.37689					-4.7457	-2.26929		-1.49713	-26.8734
0.54004	-0.418121					-9.49095	-1.58061		-4.27368	-31.8802
-1.58692	2.16248					-10.4977	-3.49357		-12.1877	-14.3084
5.4888	0.728499					-8.1882	2.27099		-2.43149	-1.70005
0.270862	-4.11155					-15.6266	6.16539		-9.71614	-30.8439
-0.426654	0.187359					-13.7696	2.52289		5.59566	-32.5309
-3.07051	-9.40957					-13.2	0.140327		2.25353	-23.1213
4.35203	-3.81145					-8.50415	4.87027		-7.61705	-12.5518
5.35888	0.413196					-14.3982	-1.60453		-9.96611	-5.70852
-2.59223	1.69758					-4.75246	1.97285		-1.28148	-24.485
3.63289	3.64894					-15.7972	-6.56942		2.39182	-21.4873
7.43671	-0.632707					-8.24995	-5.44336		-1.71318	-33.8086
3.56776	0.603775					-8.25571	3.45878		-8.7089	-23.286
-0.721976	4.49607					-5.88992	2.93473		2.17543	-26.6031
0.663221	-6.33655					-10.492	3.02663		-0.823403	-17.8426
-1.54763	-4.09602					-12.7325	7.96635		-7.94193	-26.7236
-1.46763	-7.84992					-10.4149	-0.727324		-11.707	-22.7817
2.62232	-0.592238					-12.6364	-10.4269		-14.4476	-10.6338
-0.352806	6.89871					-13.4607	-5.03732		-10.6973	-3.50451
2.37233	-0.724198					-16.6732	0.636334		-10.6871	4.69321
1.31846	0.191135					-16.1319	11.3999		-11.1334	3.90053
0.875705	-1.24614					-12.0181	9.20606		-7.55742	-4.74614
5.7286	-2.0957					-16.8006	8.64919		-4.94932	-6.19785
4.16923	-1.5155					-17.4855	-1.93742		-4.11155	-0.730727
4.61965	-0.680818					-13.0997	3.80823		-2.46362	-2.63256
0.197318	0.740132					-7.81058	2.78041		-3.93226	-27.2908
0.0406119	2.2104					-8.61863	-2.88579		-7.29952	-20.6853
1.14015	2.93539					-13.5488	-3.36058		-14.7956	0.706644
2.45984	2.09618					-11.6055	1.7573		-3.49083	-11.563
4.07207	2.69809					-8.54732	4.90351		-2.45141	-28.5174
0.605184	-4.08889					-17.5513	10.3937		5.54882	-25.4887
3.16958	-6.43395					-15.7634	7.67191		0.365779	-22.2304
3.35518	-9.24219					-11.8049	6.36372		-4.38178	-12.2888
7.4723	-9.22277					-8.45176	-0.615578		2.77175	-26.0061
3.17055	-7.17889					-9.49531	-0.619293		-2.06182	-5.5702
3.77095	-9.00981					-15.2035	-3.66105		-11.2955	-6.39008
1.61897	-5.35385					-12.3855	-0.392629		-12.132	-7.33213
0.437964	1.88265					-10.4127	-6.94111		-15.7578	0.477295
2.19546	1.79523					-8.51725	-24.4408		-14.9104	3.05015
3.41955	-5.3639					-9.65402	-0.691501		-15.7794	8.50462
1.98309	-7.84947					-15.1446	7.07997		-5.08437	2.45006
0.55438	0.709434					-11.1663	4.96862		-3.50769	-0.196763
-0.876471	-1.66455					-11.8952	0.866172		-8.7945	-3.01588
2.32664	1.10543					-14.2915	5.22786		-4.41588	-2.88696
3.36358	-1.47788					-14.7871	0.785081		-2.06457	-20.6078
1.34141	-6.17101					-17.4653	-2.71799		5.24898	-21.4274
2.92928	-7.80218					-15.9642	-5.61352		-13.3902	-10.081
0.647204	-3.37247					-15.3173	-5.16473		-3.8743	-20.9385
2.60804	-0.390252					-8.55993	7.78069		-1.27902	-3.35543
4.30238	-4.97944					-12.2362	3.30851		-4.20517	3.39413
6.36849	-3.77322					-14.0545	9.43807		-5.73072	-0.83049
4.15204	-1.59893					-12.7754	8.54757		-0.662221	-1.05997
6.12513	-0.266925					-14.8264	12.5795		3.50296	-7.05655
3.2824	-1.85618					-11.5364	9.26339		-6.53092	-2.8071
4.63177	4.85812					-9.03274	3.08607		-5.5724	-17.0761
4.18239	-2.11648					-6.64119	3.95718		6.4659	-21.6305
1.38736	3.52773					-8.20136	-0.888312		0.285335	-6.26666
-1.59794	-4.74033					-11.4057	7.72814		-11.4568	-7.62599
1.0248	-2.54799					-17.4677	-7.09617		-6.03469	-21.3375
-1.07209	-1.49877					-7.3722	-4.66084		2.34863	-17.5094
1.14263	0.695084					-8.17027	2.14498		1.69397	-10.3139
-1.05686	-4.95094					-8.88147	2.54054		-0.335825	-5.59456
3.52646	-6.44918					-8.91002	3.27391		6.17229	4.87685
-1.52591	-6.80293					-10.0688	7.50967		8.11613	2.0787
0.987799	0.548931					-10.136	9.88576		6.92163	-1.63622
1.73675	-2.66686					-11.1155	11.4501		6.91945	-0.443345
-3.87128	-4.20327					-11.9126	9.54469		5.56721	-3.30045
-1.26448	-1.11274					-12.4694	9.28384		4.69783	-20.1279
2.96729	-5.96827					-7.76646	3.76556		-9.02012	-18.264
-1.79902	-6.29977					-11.148	9.93758		-1.04215	-16.6456
-3.16041	-3.88126					-13.6458	12.251		1.42861	-24.4703
1.36888	-1.60406					-12.1302	11.2617		-5.21579	-9.62749
2.32258	0.133796					-12.9346	4.08597		-10.5109	-9.52327
2.28492	-5.53905					-11.2823	2.64631		-1.22047	-30.3827
2.34396	-0.199151					-10.5206	2.41423		-5.07278	-12.3409
-2.29258	-4.10734					-10.678	11.3872		-4.94474	-8.27965
-0.422006	-0.534777					-9.20112	4.90068		-8.24448	-2.81349
2.91941	4.37538					-12.2831	10.4177		-8.68118	3.22853
2.95506	-2.86839					-13.9525	9.48455		-7.94378	-11.5078
2.46317	-3.20843					-16.9574	5.89375		-6.25822	2.38543
5.90871	-2.94991					-17.5835	12.2255		-3.78344	-4.4207
1.52452	-0.406775					-21.5477	3.8607		-5.49478	4.64332
2.0938	-1.65271					-21.6368	-3.10634		-3.1804	-21.048
3.01433	-0.500709					-20.1763	-7.21774		-0.262375	-23.756
8.41335	-1.56801					-20.6707	-5.29469		-9.70164	-29.3782
8.51281	-5.52563					-18.1836	2.36189		-6.55779	-30.7132
6.02871	-6.3285					-13.9228	7.11922		4.10161	-11.6909
2.57138	-6.57543					-15.3005	10.5531		-4.92891	-22.1842
5.75813	-1.69545					-16.0378	6.34154		-2.84732	-29.8218
3.29182	0.483785					-15.0441	7.1691		-6.8809	-29.0099
3.65321	-0.526183					-10.9974	5.15819		-4.52863	-28.9395
0.297177	-7.37559					-13.2816	4.31913		-3.59916	-9.71445
4.3877	-3.61028					-18.2787	-6.44465		-4.32569	-21.752
3.24774	7.204					-11.1765	0.567324		-3.57301	-1.23291
3.93456	-1.61854					-17.1156	-0.321383		-9.08898	-9.50718
1.59538	-6.46476					-15.0376	2.86609		-9.65734	-20.5182
-1.56232	-1.24956					-9.83369	3.35719		9.89609	-14.3422
3.01025	6.07052					-8.61161	1.49473		-2.45079	-19.8062
3.58481	6.72184					-9.93737	0.322927		2.80257	-11.7487
1.11153	1.89759					-6.53225	1.9297		-9.73199	-18.6215
2.89213	2.88306					-10.7829	7.35254		-9.60702	-16.5611
1.68174	0.938774					-10.5061	2.70533		2.58031	-0.27773
-3.36513	-8.37578					-13.4289	0.342338		-1.15437	-13.5118
0.21193	-0.81691					-10.1075	1.98548		-3.74086	0.00222546
4.19898	0.0731889					-12.3895	8.97065		-0.00232538	-10.4143
1.1502	-5.1123					-14.8219	12.7899		-3.37958	3.1786
2.26275	-0.116117					-9.12999	5.6307		-4.31699	-2.97708
1.81547	-4.89977					-6.36129	5.57968		-6.46384	0.344482
2.2666	-9.08207					-9.81507	-1.38495		4.59072	-13.5966
0.791855	-0.0445707					-12.199	-3.02287		1.23336	5.31558
0.957556	-5.74922					-9.42604	4.52078		-4.98859	3.15407
0.243202	-2.86814					-11.4366	-5.98538		-2.58944	-8.03249
-0.135147	-1.91186					-7.57253	2.40782		8.16014	-17.7366
-0.572067	-5.59438					-9.16735	-4.01693		-5.29684	-12.2164
0.878476	-2.79605					-6.49477	0.592412		-7.19046	-16.4848
1.15443	-4.46661					-9.11992	-0.626257		3.26065	-8.42842
3.74459	-0.57082					-11.0041	9.55018		-9.09636	-4.55628
2.90046	0.317236					-10.916	4.22082		-1.11551	-9.95725
2.13385	-0.69969					-10.3672	7.38727		-7.52345	-18.1632
5.05581	-0.401786					-9.60878	1.95413		6.5044	-16.1099
2.15763	-4.59356					-10.9763	9.02822		1.27855	-21.0977
3.11985	-0.0611241					-8.66954	3.62751		-3.31996	-8.34421
-0.0348866	4.06441					-9.18306	7.81655		-15.9848	-3.3288
0.363715	-0.35114					-15.5222	5.59173		-12.4551	-10.4142
4.43471	-3.15639					-11.0207	7.43567		-4.51831	-20.4535
-2.44994	-3.39505					-15.2884	7.04249		-15.0769	-4.3685
1.30117	-4.26157					-20.9295	1.80626		-13.8929	-15.0452
0.958101	1.31074					-14.7064	7.66271		-16.1722	-5.99213
2.71206	2.33737					-14.1944	12.1723		-11.7965	-12.4136
0.768384	1.9933					-21.1543	0.402377		-4.52342	5.95539
0.0947216	1.48701					-10.3552	4.59533		5.87421	0.632446
1.53397	-3.25604					-9.93748	4.31795		-7.33076	-14.1827
3.08492	5.04657					-8.77247	3.51708		-6.6971	-11.2018
-0.303309	3.00816					-12.9433	7.1967		-7.98648	-7.92079
0.143504	-2.10005					-13.3118	8.06668		-12.1733	-14.451
-0.516533	-0.240348					-11.9152	10.4291		-18.4598	-17.5986
-3.48251	0.948554					-21.059	3.14694		-10.2627	-24.6903
1.88865	0.523104					-14.7952	3.29174		-5.44226	-26.0764
6.02841	-1.17289					-16.0116	5.88286		-9.54593	-21.873
2.16313	-4.86819					-19.1656	1.69181		-8.56146	-29.5628
3.24098	-2.96104					-19.4433	0.240458		6.25241	-24.2287
3.89838	1.14094					-17.5415	2.53291		-1.61618	-23.1861
4.99797	0.851356					-17.4793	-5.31096		4.43194	-16.259
0.147237	5.47757					-19.4143	1.35368		-7.77706	1.53379
2.38997	1.66753					-10.8343	7.55482		4.48702	-12.2853
1.11484	0.215365					-11.3876	5.112		3.33877	-34.1978
1.82308	0.637528					-10.9677	-3.81043		-0.180299	-24.9216
-0.144674	0.621966					-13.96	-5.10046		-2.63321	-13.4493
1.26799	2.71937					-12.6466	-2.35842		-11.0096	-1.95507
2.04951	-0.833648					-17.223	8.01225		1.19927	-1.78854
3.79598	-4.65281					-8.82949	3.18252		4.04054	-16.4566
5.95152	-3.41365					-5.47547	0.553272		-1.45003	-24.8308
5.20139	-5.26742					-3.91759	1.40936		0.834864	-11.9999
-1.78224	-4.22389					-5.44935	-5.52822		-2.78084	-18.3167
3.34697	-3.85163					-8.39214	3.50306		7.29702	-11.035
6.20998	-5.02699					-13.14	9.26888		8.41713	-17.9695
3.75939	-8.60407					-8.65606	9.13069		-9.49306	-11.7198
-0.00436812	0.188243					-12.3124	10.4362		-5.72367	-19.0409
0.375366	0.306225					-11.7545	7.89962		3.97036	-28.5266
4.29957	-7.70252					-13.0959	-1.33105		-5.97709	-17.1976
-1.43352	-12.6571					-13.5312	9.4799		-3.74083	1.72955
3.78747	-7.92953					-12.8298	10.1079		5.0588	-5.24803
6.53787	-5.7459					-9.53138	3.93988		-8.6993	-17.5968
1.21882	-8.17267					-18.1955	-6.26003		-4.4866	-26.4175
5.5246	-7.49923					-18.5394	2.31598		-0.103973	-6.05979
3.96516	1.03715					-10.1034	10.2248		-0.915984	-13.8822
0.964171	2.84267					-8.61779	3.36643		-6.15826	-11.8516
3.32935	5.11953					-12.5809	1.13707		-1.77693	-11.5823
6.18893	-2.61489					-10.2425	7.62374		0.977014	-16.939
6.92656	-5.8362					-13.0475	-3.52648		-2.66152	-17.5699
4.46038	-3.9785					-8.28652	-1.84253		-5.25002	-9.66258
7.43952	-7.25358					-18.7395	-3.97766		-13.1447	-26.6984
4.23179	-1.49999					-11.0645	1.64857		2.36141	-14.8686
1.8579	-6.0721					-10.3929	0.642617		-4.5301	-3.3558
3.05319	-2.81396					-15.3398	-2.04438		2.0757	-12.9186
2.27015	-6.04546					-18.3295	-6.74768		-6.00787	-6.96354
4.20295	-9.66313					-13.449	5.18681		-2.92397	-14.1971
3.13804	-1.49663					-18.0956	-0.39901		-3.20177	-31.0657
2.58595	-1.12723					-18.6346	-3.31811		-5.44664	-33.9944
5.69182	-5.99716					-15.512	0.762241		-2.70203	-23.0536
5.32059	-9.70787					-17.1496	1.33022		-5.64533	-29.7677
4.94203	3.39529					-17.0483	0.15377		2.50468	-11.4888
-0.84642	2.4756					-17.2634	5.43348		1.45681	-3.40977
-2.48066	-4.70175					-12.4333	9.48745		-10.4311	-2.55322
1.29208	-1.92174					-17.3265	5.49695		-5.01467	1.48249
-1.48937	-8.31168					-17.9739	-2.95238		-6.07748	-0.936869
-0.575893	-5.19785					-10.4898	7.71089		-0.428831	0.874575
2.89594	-4.00314					-10.5505	7.99619		-5.19773	-10.6094
2.4021	0.820461					-12.4331	11.7841		-5.08138	-1.77128
1.27389	-4.54269					-13.5996	8.3752		4.20582	-2.62455
2.5506	1.53466					-14.5078	7.65198		-2.9478	-7.14934
2.50061	6.03559					-18.8654	-3.73925		2.78923	6.62649
0.406009	4.6937					-11.9301	-1.80805		-4.86139	9.15502
1.87032	1.9094					-14.0062	3.60189		-8.34731	7.62182
2.34475	0.439876					-17.1568	7.4038		-5.81379	1.7694
3.8177	0.475391					-13.6218	9.72202		-3.13534	3.19065
0.471858	2.67561					-15.8337	3.00606		3.06213	-16.1923
-2.56855	-1.78722					-17.036	0.832397		-8.84153	-16.0885
1.70845	-1.76163					-15.1399	-0.74669		-6.53699	-24.5286
3.11325	-4.68895					-14.4289	10.21		-4.07184	-13.2437
0.808929	-3.58054					-19.5805	0.169438		-10.4913	-19.1425
1.40999	-0.703615					-18.5506	-8.49754		-8.12708	-18.1106
2.2129	-6.00649					-19.0857	-7.01873		-15.8791	-9.42064
-0.13587	-5.98106					-11.4571	-5.46351		-8.52828	-12.3559
-2.28449	-6.62178					-13.3031	3.97946		-8.3718	-22.4742
-2.29088	-1.94998					-10.9939	-2.3197		-6.18135	-17.7067
-4.08211	-6.46592					-12.7159	10.591		-4.62796	-5.3898
1.29348	-2.63436					-13.9275	8.61711		-10.7681	-13.492
-0.672586	1.06242					-10.6532	9.06099		-3.45768	-0.593575
-2.0548	2.03477					-12.0364	12.3083		-1.44324	4.91389
-3.64123	-1.66326					-14.5552	9.4752		2.23211	5.79374
-2.19018	-2.11154					-13.3161	9.21079		-7.42019	-4.4981
-3.69735	-4.21632					-7.38626	3.50717		1.20946	-7.33765
-8.69995	-0.548234					-10.8931	6.45769		-5.07013	-4.11732
-6.42026	0.997554					-10.6269	2.96647		-2.41611	-14.7374
-3.97047	-5.67063					-15.7235	9.41965		-1.54513	-20.41
-4.4309	0.965727					-19.3426	4.47561		3.68666	-20.5573
-2.53406	-0.703733					-16.144	4.35042		-2.09765	-26.0653
-0.106092	-4.46751					-9.52024	-18.8109		-3.01343	-30.4429
1.47404	-1.36436					-6.4539	1.437		-12.4252	-24.6882
0.0954401	-6.76624					-11.9698	6.10069		-2.66007	-7.27457
1.02791	-0.706261					-12.0492	5.40389		-1.50831	-6.12949
0.123257	0.817367					-11.5374	-0.309973		-0.477975	-13.3417
1.16832	-3.65895					-8.97643	7.23156		-4.64254	10.8603
-4.70721	-2.54299					-9.66207	6.81263		-9.14891	5.34331
-3.05954	-1.41085					-13.1035	8.13952		-6.49694	-2.32974
-2.65943	-1.82971					-12.9057	10.8492		-1.60401	-5.39228
-1.52525	-4.08223					-12.5066	7.19567		-8.84957	-18.3879
-3.6562	0.476592					-11.0565	3.5054		2.23559	-19.652
-1.53255	-4.8244					-18.377	7.95225		-9.45247	-21.4705
-2.22504	0.900731					-21.2361	-4.31701		1.28974	-33.5056
-1.55893	-3.50385					-10.039	2.49938		2.44126	-24.3011
-5.22655	-1.26349					-9.87673	5.19664		-3.13098	-18.2777
-8.51841	-3.21994					-16.2301	-3.30859		-6.89051	-17.5078
-1.6284	-3.66651					-13.7469	7.94552		7.29499	-17.9529
1.60966	-0.408067					-13.3188	5.93598		-6.67326	-19.3193
-5.79576	0.794931					-9.28314	-1.44621		-3.66057	-16.8647
-0.582446	-0.00961258					-6.61661	3.50436		1.34675	-27.0374
0.208771	3.07889					-9.63209	0.912362		-0.10537	-0.687972
-2.64406	0.495005					-11.6856	7.96951		-1.00465	1.68758
1.47285	-4.43466					-9.80439	3.61132		-9.37239	4.50033
5.12222	-5.31863					-21.3014	5.28828		-4.89116	-11.5603
-4.22825	-5.83559					-16.1366	4.33154		6.23937	-8.25842
-4.65917	3.64182					-15.7046	7.31097		5.25565	-4.03957
0.805517	-1.24487					-18.3832	2.00384		10.3372	-6.30791
1.24431	2.86969					-12.6938	1.65823		-1.29485	-14.294
4.86792	1.97559					-15.0882	6.94382		-1.27204	-14.8628
0.552058	-0.316307					-20.7203	1.75596		4.54077	-35.8944
4.45642	0.229757					-19.6091	4.61061		5.69124	-12.7586
-0.679808	-1.66223					-19.5325	-9.76042		1.97377	-24.0978
-0.712047	-3.82949					-18.4523	-6.70841		-0.723411	-30.9892
2.27366	-1.73277					-15.3573	0.0741535		-3.85473	-32.6461
-0.0739571	-4.62239					-10.1613	0.329731		2.00802	-25.6987
-0.303705	-1.31308					-10.962	0.311978		2.24853	-9.87947
-8.68953	-3.65707					-7.0126	5.37806		7.73749	-5.67856
-2.4265	-0.1181					-13.6521	-2.10869		6.76213	-16.9808
3.22493	0.437408					-18.0245	-3.71473		-5.17947	-16.5506
1.97666	-1.37684					-16.9016	-2.35886		3.06768	-28.5511
0.282036	0.817633					-11.5243	2.35015		2.69794	-16.6148
-1.83035	2.70647					-14.5654	11.4749		-1.94964	-16.9502
-2.23899	0.139209					-13.0406	6.97176		1.96439	-9.2907
-5.30785	0.065667					-11.6424	3.96334		-0.467163	0.604865
-7.27405	1.28507					-8.71362	5.98305		-7.27745	-4.52805
-4.69103	-3.27347					-13.2056	9.37457		7.18376	-16.3348
-5.14989	0.460915					-10.4057	12.0784		-11.9861	-36.7534
-4.69166	-1.84881					-11.3487	7.84963		-2.52443	-24.4162
-4.20325	1.26292					-9.84642	4.60708		5.24704	-27.9699
-6.38806	-0.676362					-8.99884	5.45931		8.45034	-22.7191
-4.70957	-8.41815					-13.7863	9.22735		5.19949	-13.0729
-4.89999	-3.68276					-8.60395	3.82391		2.38973	-8.79254
-2.79257	-6.49059					-13.5854	7.30459		-2.02299	-22.5349
1.28523	4.80169					-17.3321	4.37568		-10.7206	-32.3414
-3.53986	3.24726					-13.9994	10.3085		-9.93713	-32.513
0.81726	-1.79484					-15.7022	3.69583		-5.13426	-31.1475
0.648797	-3.40142					-14.0167	-4.55467		-1.31385	-19.8082
-2.54172	-7.1608					-12.7222	-1.57908		4.51288	-17.4242
-1.187	-2.27638					-12.2882	-8.18587		-3.78391	-7.93897
1.16097	-4.44814					-11.6075	4.7391		-2.99563	4.68276
1.73585	0.314941					-9.97895	6.90484		2.57961	3.4275
-2.76226	7.00648					-8.11019	0.986539		-1.1579	4.06677
0.396251	1.73686					-9.18137	-0.520947		-0.964368	5.63408
1.13377	-2.4499					-5.60709	-6.31124		1.94649	1.69761
-0.0108259	7.32211					-9.28605	3.01062		2.77092	-9.34355
-1.31875	2.96172					-6.47219	6.09813		-8.77407	-18.5981
-6.36173	-2.91494					-17.3303	13.4092		-10.2259	-27.215
-5.56542	-3.32361					-14.6491	9.45988		-11.4503	-23.8158
0.526865	1.26304					-14.4256	10.3368		7.86653	-18.6157
-3.0786	1.69716					-8.68801	3.75546		3.10346	-7.05924
-8.31258	0.758542					-9.01255	5.58416		3.42369	-10.356
-5.49367	3.10253					-9.77802	5.30766		8.1425	-15.9446
-6.53328	5.13126					-12.4117	2.31935		3.15368	-25.2746
-5.98145	-0.7056					-14.2762	10.6481		4.3973	-31.4423
-2.69398	3.00055					-12.0045	11.2279		-4.0679	-8.12009
-2.45776	-0.977799					-13.3892	7.77705		-2.1899	-24.6291
-4.28332	-3.00911					-10.5333	6.97906		9.77297	-18.0281
-1.80195	-0.600332					-7.83315	5.78801		0.331646	-22.0172
0.627492	-3.61257					-7.78079	2.18575		2.31253	-22.1349
2.24615	-2.00846					-12.8064	7.99471		3.27812	2.68666
-1.45551	-8.5181					-7.89148	1.07512		8.79822	3.27556
1.21648	-6.15199					-10.2121	0.771995		7.26707	-3.73324
1.25583	0.344841					-11.3631	2.82013		3.4321	-13.5917
1.43971	-3.8109					-17.7046	4.99477		-0.701358	-12.7474
-0.603576	-1.08341					-10.6872	0.410688		-0.203981	-0.0542049
-1.79034	-1.99129					-12.4066	-2.40595		-5.33706	-2.96333
-1.75629	-1.964					-16.3754	-5.44781		-2.6092	-9.74808
0.367879	3.02633					-19.4084	0.272246		-4.7318	-4.54945
-6.50609	1.43263					-11.6944	1.73372		-4.55911	2.96168
-9.9772	4.29911					-10.0822	-1.12384		-3.62973	-21.8285
-5.85465	0.229249					-9.92627	4.97709		-11.066	-20.4496
-2.92504	-1.22442					-14.6961	5.84629		-4.24698	-7.57242
-2.89146	-0.36769					-18.5148	11.1347		-15.6328	-11.1926
-4.40635	-1.84478					-21.829	4.18593		-7.09634	-16.2735
-4.64945	-1.7201					-23.0352	-2.73195		-1.56023	-21.1195
1.45818	-3.23739					-21.2823	3.51021		-10.7914	-34.7638
-1.79547	-1.09607					-23.0552	2.3999		-3.28913	-23.8849
-1.23345	1.81268					-20.8136	6.54918		5.85802	-19.9854
1.34362	3.99676					-14.0509	8.98808		5.99138	-23.361
0.474683	3.1562					-14.4073	-0.416409		1.38844	-29.883
5.8081	-2.801					-13.3925	7.46262		-3.19594	-20.3944
0.908643	-0.448589					-14.6804	9.23762		-3.44009	-14.7131
-0.336806	2.64925					-14.5934	8.55204		-10.3011	-6.84762
1.41007	1.59744					-15.993	4.16223		-1.39054	-8.21788
6.90757	-5.19967					-17.1213	0.271148		-13.988	-20.5118
-1.4039	-4.46514					-14.1482	6.10281		-11.2248	-14.4429
-3.11468	-0.618776					-15.4214	-5.24714		-8.1372	-13.1947
-0.183405	-2.99362					-19.384	-6.83213		2.59327	-6.7978
2.49764	-7.63191					-22.7182	-3.91901		1.09743	-11.8445
2.64606	-5.06684					-19.5287	-2.67055		-2.42679	-21.5959
2.64193	-2.48526					-14.3604	-0.601415		-4.76421	-24.5994
2.59176	-3.55884					-18.0419	4.928		-0.435003	-29.2786
-0.357803	-5.28981					-12.0693	7.89272		0.132998	-29.333
4.98809	-1.24048					-7.69966	2.12517		5.86948	-15.1433
3.77771	-2.50536					-10.7218	3.88802		-7.41366	-3.98631
7.49206	-1.87814					-14.7024	0.0558547		-9.57249	-8.36758
2.49454	-0.810883					-13.1633	1.97615		-12.4372	-0.285724
-3.65426	-7.18959					-15.6853	6.72773		3.32395	-14.4066
-2.66281	-1.24468					-14.9789	7.26217		-4.3821	3.04477
1.06809	-2.84532					-12.1467	6.81358		-6.0967	1.00588
2.44311	-5.14106					-15.6807	10.9263		-6.3739	-16.8267
-0.596547	-2.85197					-12.9235	6.99298		-0.743329	-14.8072
-0.652096	-5.53968					-15.3055	4.1696		-12.4982	-8.71856
-1.51146	-3.31936					-11.9931	6.99211		-4.90787	-15.1073
-4.82192	1.25969					-15.0736	10.5671		1.10864	-25.0002
-3.47113	-6.76081					-16.5568	8.26339		3.32297	-30.2069
-0.9565	-5.55607					-15.1544	6.36948		1.26107	-14.0884
1.42718	-1.92185					-17.6038	5.32921		-7.844	-20.5432
0.101429	-0.511818					-15.963	9.44449		-9.61593	-13.63
1.79643	0.603523					-16.1709	6.66702		-3.31174	-20.5552
1.90326	3.54458					-16.6437	8.31134		6.45404	-37.8528
-5.51292	-2.64631					-21.0174	3.27197		3.27728	-8.61013
-2.47697	3.19974					-22.1799	-8.16574		3.79308	-12.0505
-3.46779	-1.06518					-20.2773	3.46103		-3.72209	-1.46815
-4.06819	3.14471					-15.8537	-2.8646		-1.38062	5.78844
-2.90515	-5.05293					-8.79715	4.96561		-1.7678	2.55322
1.37879	-4.42596					-12.5835	2.6864		0.389945	6.01837
1.52761	-5.70969					-14.1257	2.68331		-6.91205	-2.4347
3.38432	-6.50741					-14.7647	5.39142		-1.16447	-11.6241
5.75259	-1.72243					-20.3054	10.4625		0.312651	-0.510009
1.22196	-1.60807					-20.1718	12.6178		-5.24192	-1.99077
-0.593508	3.00341					-20.1066	9.0234		-10.605	-5.40876
-1.56312	2.7778					-17.9392	9.97721		1.561	-19.8984
-2.78977	0.864109					-14.7034	5.99871		-2.25551	-24.5591
-1.4336	0.285038					-20.1263	10.2663		-5.0602	-8.31203
0.444776	7.58895					-16.276	0.899288		-9.19914	-0.0581192
0.202572	-2.92498					-12.8439	9.0256		-3.31625	-12.931
-0.362364	-1.99607					-10.18	0.258417		-6.71333	5.83746
-3.30522	-3.39551					-12.3239	6.25887		-2.6825	-5.89782
-1.18779	0.253572					-11.6367	9.29531		-6.38728	5.89502
-1.41598	-0.550951					-13.8433	10.9726		1.09803	-10.5535
3.30095	-3.21871					-18.71	11.7691		7.04863	-22.1626
4.25044	-2.33406					-20.7416	1.50229		2.08439	-23.6015
3.82502	-11.5647					-19.7777	9.68527		-0.95388	-23.6226
1.18347	3.04495					-16.6007	8.47722		-0.135515	-8.47379
2.08731	2.42028					-10.858	9.73048		7.72857	-7.79826
3.50523	0.388259					-8.52677	8.83847		7.84427	-14.3916
-5.22205	2.44758					-8.51736	4.45613		2.13721	-4.44168
-2.27514	-8.80084					-11.6492	6.5818		-5.33027	-6.76784
-2.35828	3.33145					-13.3771	9.69494		-1.55153	-2.32989
1.05389	-5.69415					-16.4905	9.55686		-4.64945	-9.84687
1.94364	0.611487					-18.7145	10.7774		-7.42796	-15.5582
6.64313	-7.18503					-10.934	9.3308		0.00154947	-10.6327
5.25361	-2.3933					-12.3371	0.69277		-5.09227	-3.4906
7.47753	-1.9932					-14.7365	-0.0396119		-1.35653	-8.11891
0.618849	-6.28016					-13.6984	10.8241		3.35684	3.99514
2.06296	0.457995					-16.1911	8.34227		1.95383	-1.38744
-2.37065	-6.50534					-15.4424	4.40368		1.20951	-1.14714
0.169025	-1.12702					-11.5092	9.04038		3.93756	-2.33441
-0.735665	-0.529881					-17.4138	11.4197		1.19367	5.58587
-0.233604	-7.31031					-14.8143	11.4354		7.32578	8.95561
-1.45075	-2.84198					-18.0387	8.72745		-1.53394	-4.53309
5.3223	1.61792					-17.9973	9.08989		6.36448	-3.79466
2.81112	-2.94013					-16.5164	12.7941		7.45352	2.83945
0.788481	1.32068					-12.1358	6.75441		1.82627	-10.0361
-1.04421	-4.38478					-11.8526	7.74092		-0.0882691	-1.24819
2.4737	-3.53327					-14.3317	9.22994		-5.28403	5.70213
1.32903	1.21686					-17.0754	13.6098		-7.83275	-5.38055
-0.743502	1.4478					-12.2995	13.3615		-6.03305	-10.3416
-1.10003	-2.65396					-11.7531	8.65287		-6.00023	-16.4007
-2.58861	-0.754385					-15.2688	2.71735		-2.55386	-11.575
-4.97716	-4.86498					-14.5943	6.29491		-6.95117	-27.5537
-1.47281	-2.22583					-10.6637	13.349		-2.84118	-23.6152
-2.51517	2.94326					-15.5725	10.9781		-0.427557	-1.77445
-3.83234	-2.1486					-16.5527	5.26198		-0.149127	-16.762
1.1535	5.73583					-15.1794	9.53173		-5.51374	-26.8841
-2.89699	-4.69599					-14.2422	7.5717		-6.68224	-23.6742
-6.3774	-7.54597					-17.4496	1.93281		-5.73196	-29.1693
1.82684	-4.52379					-13.6169	7.09406		-6.36998	-12.7919
2.63795	-0.1863					-9.02896	6.12561		-8.00233	-9.45826
0.888365	-2.49871					-10.844	6.14613		-7.0605	0.492691
-4.1339	-1.83956					-19.5617	-1.43732		-1.18511	-2.73997
-3.1704	-0.262456					-9.18253	6.5012		-5.52985	-20.1588
-2.76371	-3.66959					-12.1046	3.14502		-16.2961	6.81704
4.37732	-0.465883					-14.37	11.4827		-12.314	2.95052
2.71293	0.0757923					-18.466	6.26132		-9.87161	-13.1784
2.04695	1.15789					-16.5705	4.7775		0.587162	-15.6591
1.31323	3.4157					-20.2077	0.393154		-0.118562	-20.2451
-0.966584	1.75028					-20.5276	3.95306		-4.31014	-9.3313
0.878537	-7.12717					-20.6061	0.897362		-9.71453	-14.3863
5.42596	-1.14504					-19.0418	-2.21949		-5.96478	-0.362773
-0.0990631	-2.65724					-20.7589	-3.43835		-6.39963	-12.1465
3.2542	-4.34982					-17.2466	5.04001		-1.27073	7.45966
7.48744	-0.309874					-17.1081	13.6805		-5.40338	-9.85687
3.92012	0.0619596					-14.3537	13.2473		0.0299572	-12.1518
5.27391	1.65972					-14.4201	7.84507		-0.169492	0.295456
2.74089	1.57451					-14.7963	14.0488		-1.02031	2.63449
5.77684	0.994809					-12.1204	9.74571		6.1367	-21.2792
4.98538	3.93201					-16.4067	7.76926		-0.579326	-5.76749
-0.539708	-6.79754					-15.4548	9.401		-3.09762	5.85899
2.56281	-6.45315					-11.4587	4.84337		8.3727	2.91011
1.80947	2.58031					-11.9563	13.1002		6.7954	-15.8263
3.49033	-0.624073					-15.0607	11.8278		8.42533	-12.5732
4.69263	-3.32962					-18.2614	12.0617		0.7297	0.0910865
2.22014	-5.17112					-13.2781	11.4962		-0.684042	-2.64539
3.39322	-0.385918					-15.6351	14.8107		-5.93703	-1.93411
0.724291	-0.964002					-18.9348	3.96234		-3.94568	-3.09292
-1.87049	-6.59645					-19.437	7.55829		2.07044	-17.4764
-1.0263	-6.72855					-19.916	10.3629		-3.90343	-21.9774
1.52533	1.73378					-13.5421	3.37432		2.71859	-23.5311
-2.79252	-7.17353					-14.6148	9.14049		-7.05999	-8.61301
-0.2839	1.78364					-13.322	2.93062		-7.49529	-3.39153
3.97742	-3.33558					-7.63993	5.40294		8.5057	-18.5341
5.61029	3.42542					-11.5897	1.19697		-2.12414	1.45741
-2.84202	-6.27253					-10.1606	-0.325673		-1.05813	0.926777
2.43713	2.07653					-10.5548	2.56875		-1.09703	-3.01056
-1.11978	-0.937774					-11.9428	9.42949		1.24538	-18.1198
-6.05743	-0.657806					-14.6376	9.11473		-3.21861	-19.1556
-4.39493	3.60807					-16.8492	10.0834		-12.5677	-9.32158
-0.606468	3.80709					-13.587	5.62189		-7.9649	-14.8091
-3.04126	4.3059					-16.847	6.58817		0.941908	-16.8599
-0.856384	-2.13312					-11.2747	-0.718713		-13.217	-25.2156
-8.50056	0.748879					-10.365	0.501646		-9.431	-29.5787
-2.06865	-5.00871					-10.392	6.28595		-7.50339	-31.5515
5.04994	1.23598					-11.3496	4.36176		-7.34475	-19.3392
3.0699	-0.35937					-8.93738	5.25617		-18.7022	-13.5034
-1.04908	2.38707					-12.0235	9.99679		-0.882275	-30.1576
1.70143	1.46636					-13.3041	8.49412		-10.7809	-7.59198
0.956424	-3.6644					-11.1621	1.82437		-7.9362	-12.4448
-0.166534	-5.70766					-14.1994	8.91564		6.03924	-17.6588
0.234597	-3.69113					-13.6664	0.498666		0.670334	-17.4162
-1.88274	-5.50983					-16.5998	3.02779		0.642509	-14.9155
-7.66001	-2.65795					-15.6126	5.79106		-7.15076	-27.6168
0.366133	2.16309					-15.2079	5.12058		-0.786727	-21.3896
-0.562191	12.2139					-11.2705	-1.39316		-6.9739	-25.3557
6.64192	7.52717					-15.4356	-1.35747		-7.03952	-23.3596
3.68711	7.57735					-12.8525	5.62678		2.22643	-14.5507
4.26739	7.91475					-13.4935	6.18154		-6.59893	-5.60915
1.06975	7.16577					-14.8895	6.36715		-7.80517	-14.3218
3.73897	11.6504					-18.205	8.12447		-5.59472	-23.5096
4.86087	7.95699					-16.5892	4.0144		-12.156	-8.03779
5.44775	0.853719					-16.7605	-2.62236		-5.3202	-15.8065
5.44511	0.0716629					-19.0585	-4.60935		-5.3283	-27.7526
6.55234	-2.75098					-19.3332	2.85371		-0.578155	-26.4886
6.09847	-0.617763					-19.4345	3.94141		-2.42834	-18.7509
5.79619	-5.27571					-17.6173	3.48255		-3.41429	-2.63723
0.131703	0.444914					-14.7181	4.60502		-10.3147	-5.52176
4.70292	1.10834					-11.0524	7.93744		-16.1629	4.26398
3.61183	-5.86391					-10.8943	7.01715		-11.4633	6.73999
0.903427	-2.85499					-13.3285	5.99417		-7.21042	2.44351
-1.66354	0.204733					-13.9947	6.42114		-3.78347	4.64942
3.18255	-0.981208					-16.6076	4.35605		-12.3587	-8.54951
-2.80052	4.07942					-20.2437	5.16466		-11.5708	-7.72664
1.46099	-0.0290003					-14.6904	8.10368		-2.056	-2.99364
2.13163	-2.25596					-11.4187	6.79324		-1.68865	-14.9604
-0.13355	2.49679					-10.1441	3.0855		-8.16365	-22.9542
-0.224299	9.89742					-12.1042	3.22994		2.51635	-11.6732
3.12124	8.63462					-12.2551	0.148486		-12.847	-6.97106
3.90761	5.35317					-9.51022	4.92724		-1.35267	2.83958
5.68653	1.48399					-15.6869	9.47047		-12.2556	-2.63173
5.10041	3.89595					-14.0511	6.90054		-15.5886	-1.08291
-0.191604	-3.03731					-18.4774	2.03868		-3.58917	-13.2667
3.40042	6.71395					-14.8021	-2.66774		-2.35857	-22.5047
-1.17547	3.70703					-15.0711	-1.1978		-4.89059	-20.248
3.20797	6.77991					-19.8101	-2.3305		-3.39973	-3.23839
2.79473	4.20821					-18.5085	3.67718		-1.96063	-13.7958
4.30179	-0.333715					-15.7098	5.35888		0.396499	-16.8023
2.86037	0.956227					-8.83493	7.63812		-11.4514	-11.8559
-0.5508	-2.52952					-10.6192	3.78836		-9.65159	-28.412
0.582197	-2.62694					-11.7629	0.166289		-4.89687	-13.9529
-1.61747	6.93125					-12.2107	2.27674		-10.8505	-15.1881
-5.83076	5.87245					-18.8702	-8.42425		-2.11879	-28.2574
-5.46416	11.4746					-8.70788	3.85117		-3.22789	-17.8423
-7.14652	7.87015					-14.6394	5.44752		6.37468	-4.56228
-2.10497	5.19837					-15.8248	10.4318		-2.39268	5.70623
-5.41354	7.75013					-16.125	9.00392		-0.895883	2.7817
-2.15785	6.56735					-15.8003	4.41414		-3.16644	10.0454
1.308	10.001					-14.6155	6.13882		1.88075	5.48419
0.760252	4.86076					-17.4115	12.5241		5.30099	-1.25263
-1.92813	5.74781					-15.0746	8.67921		-2.79407	-0.588123
-5.32647	0.972838					-11.2062	1.95117		-6.33271	2.37476
2.40348	-0.0541803					-13.8474	2.64395		-3.24346	8.46005
-0.12875	1.11531					-11.4708	-1.20378		-0.201811	4.47923
2.35108	-0.717598					-8.32506	3.93017		-5.9618	-1.56057
-1.97711	2.27738					-10.2875	1.5814		-3.14986	-4.79059
-2.39763	-9.94482					-16.0876	2.10188		0.423616	-5.01473
-0.0889363	4.08506					-20.5441	-1.92738		-0.820249	-0.210236
-3.2948	5.69275					-21.839	-0.552266		0.961597	-0.20799
-0.224487	4.48312					-15.7008	-3.64478		-3.23542	-2.24835
0.778169	5.24471					-17.6037	-0.0540073		-3.03733	1.80739
-1.10401	-3.19181					-17.4726	-2.71869		-0.672002	8.20371
0.516099	-1.62798					-18.2023	-1.4597		1.48715	-5.38846
-0.142725	3.51865					-20.282	-1.84337		-2.09788	3.95057
0.371255	-0.518669					-15.1736	-7.06895		-1.74267	-10.4188
3.94937	-1.59956					-15.1889	0.659432		-12.173	-14.5664
2.15518	-1.74355					-11.1411	2.96487		-10.1431	-4.18503
5.2445	3.27444					-12.1949	6.11191		-5.24813	-24.5317
1.31002	0.035444					-13.8541	2.10635		-8.92225	-5.67048
0.944369	5.90225					-8.21322	1.96959		-5.14072	2.60061
2.22482	3.14321					-2.93066	-29.5348		-1.64422	-19.761
2.14179	-1.09134					0.499844	-3.99938		3.21828	-11.0197
-2.31811	-2.32478					-4.33385	-2.70552		3.39229	-16.2746
0.182706	3.63219					-0.0208035	1.2743		-1.5436	-0.910966
3.96689	2.44317					-1.94436	3.77846		-6.90721	4.2049
1.98484	2.52199					-0.918314	-5.85451		-0.895782	2.49065
-0.650978	3.71781					-3.61255	-9.11448		-0.944802	-3.45791
0.984887	6.8158					-5.28953	-10.2312		-3.12094	1.4682
-0.918929	3.39263					-5.70545	-9.53011		-5.94493	1.62303
-0.888477	-3.1391					-0.16044	-6.17801		1.19186	10.4051
-4.2571	1.57188					-3.51511	-8.37086		0.874693	-5.761
-6.99677	-0.560398					-6.23157	5.92227		2.38564	-17.1546
-0.358145	2.42706					-3.37561	-1.22815		-0.869831	4.07519
-6.17721	11.5852					-0.829151	0.107899		3.26747	-6.25779
0.572636	5.10777					-1.66421	-2.1087		-0.344978	-5.17479
0.475288	7.16264					-1.07601	-0.873321		1.11116	-4.08885
-1.76611	0.0169641					0.557445	1.84752		-0.695287	-7.35556
3.31576	8.76861					8.62668	-0.936433		-2.66461	-30.7032
0.946131	8.49991					3.64511	-0.315584		-9.36645	-5.57828
1.88128	-2.7542					-0.0252221	-5.6298		-6.87762	-23.0286
-1.1304	3.17773					0.675739	-3.66409		-0.70873	-12.5527
-3.02679	2.1006					-3.73543	1.71699		-6.38593	-19.9426
2.80212	-3.86166					-1.11504	-4.5733		-5.95174	-12.055
-4.79421	-0.768756					-1.45314	-2.65879		3.77989	-29.9808
-3.21758	2.69952					-0.998848	-0.542829		-4.6731	-17.0675
-0.638735	-2.24681					-3.84457	-1.74274		-0.631362	-26.0673
-0.524968	-1.25477					-4.78254	-0.70582		1.5175	-23.6819
3.48556	5.05502					-8.98563	-0.500569		-1.44221	-33.1703
2.75252	1.46943					-5.01653	5.41743		-9.92521	-29.5331
-3.06459	-2.62994					-3.68127	-4.9392		-7.43337	-29.9917
0.96984	-1.80905					-5.72535	1.44313		7.3278	-21.8057
1.38933	0.453236					-6.29371	2.40347		-10.7301	1.3732
2.3453	-5.66312					-11.648	-4.62227		1.42339	-14.8308
-0.301419	-2.75817					-9.43824	-0.880882		-4.45462	-17.8767
-3.42644	0.514933					-6.85223	-9.64119		-7.66606	-25.0554
0.77741	0.787398					-6.35	0.840559		-7.37989	-10.8559
2.87437	-4.14593					-2.78796	-0.948322		-3.97234	-4.41648
5.87778	-4.19435					0.751982	-1.39848		-3.3028	6.10265
3.37524	-2.37632					1.23849	-2.21337		-4.76788	-0.183091
2.11159	0.448414					-2.3762	10.0661		5.81668	-20.2543
0.728066	4.38224					-6.05866	1.11231		3.47885	-29.5546
-1.52099	-3.62265					-5.41404	-4.00586		-10.3149	-10.2597
-4.40075	-5.88579					-3.07448	-3.52845		2.22099	2.22693
-6.8507	0.512335					-1.63631	-2.53006		3.75666	0.816017
-5.67764	-3.96244					2.39394	-6.77619		2.39505	-20.969
1.5529	-8.70414					1.75435	-3.5853		8.02826	-11.887
0.615932	-4.91492					0.102154	2.26701		4.35054	-6.32033
-6.72875	-9.70406					-0.703274	4.47372		3.34776	3.49498
-5.06917	-5.55214					0.636196	5.32452		2.32465	-1.15717
-3.24578	0.709464					-1.38366	2.72043		-4.36744	-3.39022
0.386237	0.855549					2.46434	-2.01672		-2.32908	-2.03059
-0.547035	-8.60422					4.39409	-3.33001		-0.0251017	-5.30091
2.14851	1.18332					1.93012	-10.4144		-2.38134	1.83535
1.88729	0.842108					-2.8746	-4.76316		-7.94032	-5.03563
-1.53761	-3.89806					-5.31853	-1.83144		-13.0338	-3.79469
0.577718	2.39112					-3.54059	-5.40971		1.5879	-8.27178
2.10743	0.0124356					-5.25322	-4.86526		-0.701513	-4.76018
1.04944	0.709046					-7.81578	-5.80546		-0.549543	-8.35723
0.113105	-6.09454					-7.46456	2.40452		-15.7894	-6.77208
3.99882	-5.15788					-7.05811	6.59721		-16.0527	-4.74819
1.77107	-1.40075					-0.64589	7.60174		-6.75411	-3.09501
3.63234	1.17293					6.16018	-3.67379		-0.931928	-8.9822
2.31639	3.03845					5.21315	5.90894		-5.18549	-0.50048
0.602733	1.7198					2.28838	0.929505		-2.66892	-9.3991
-0.489524	1.13116					3.68862	-1.00873		-3.07138	-21.3862
-3.76489	-4.2552					0.463913	-6.1934		-10.5355	-15.4051
-4.67189	-0.831572					-4.09964	-2.81622		-15.9036	-12.3069
-2.3147	-6.76745					-0.247816	-6.93851		-8.36296	-20.5672
-1.61273	-2.01703					6.00255	-6.3897		-9.50275	-8.76822
0.377582	0.178758					-3.47691	1.64698		-11.0061	-1.10119
-2.53583	-1.01856					-2.32426	2.17927		-10.674	-20.576
1.24376	-0.216344					-6.69068	-3.34382		-13.6809	-1.65605
4.55979	5.58637					-5.14835	4.90719		-15.4528	-16.0524
-0.183147	3.95148					-5.84001	-1.4732		-7.6386	-17.6984
3.89886	-2.80089					-5.26055	2.73714		-8.87196	-26.8808
-1.35288	-5.62525					-8.00767	-8.02648		-5.33964	-34.0533
-3.51738	-8.08085					-7.79361	7.25241		-3.61118	-32.7927
0.34801	-5.99242					-5.90659	4.10462		-13.6975	-21.2801
-1.30763	0.683393					-8.08965	-8.57868		-10.9258	-16.7555
-2.65325	-0.187184					-4.557	2.78592		-8.66396	-1.13341
0.66787	-1.47846					-5.19246	-0.91117		-5.35987	-11.6226
0.0752989	-0.0663565					-12.0396	-0.491832		-1.99902	-13.1017
-2.25974	2.35948					-9.36256	1.15981		-6.6249	-23.4555
-0.529426	-0.0139962					-6.87301	-11.2345		-5.6253	-20.7571
-0.127375	3.20554					-1.78382	-13.944		-13.9404	-20.0149
2.85324	3.6296					3.65295	0.6572		4.31623	-18.8199
-2.16521	1.95572					-3.43653	0.613134		5.43608	-29.3865
1.60638	4.73055					-6.34069	-10.465		-0.59993	-33.8464
0.193628	-3.72523					-5.44826	-4.18038		-2.34902	-22.4062
0.803481	1.28402					-4.9892	-8.54348		-8.33325	-9.44852
-1.9698	-2.67408					1.93634	-8.298		0.105412	-11.3183
2.59017	-6.22243					2.70678	1.22279		-4.90572	-30.2341
3.25512	-2.38335					-1.88819	3.45193		-5.29838	-18.886
[truncated: 865,713+ more rows]
