# Supplementary material for: Kinetic regulation of kinesin’s two motor domains coordinates its stepping along microtubules
Source: eLife. 2025 Apr 17;14:RP106228. doi: 10.7554/eLife.106228 (PMC12005725; doi:10.7554/eLife.106228)
Supplement: Figure 5—figure supplement 3—source data 1. [file elife-106228-fig5-figsupp3-data1.xlsx]

## Sheet: G0 unbound
Dark-field	Unbound dwell time		E236A-WT	G0	Fig.5-suppl 3
ATP conc	uM
5	10	20	50	200	1000
143.45	37.9	50.25	70.25	14.45	30.3
11.95	60.1	13	111.35	59.35	8.35
132.6	30.15	15.3	21.4	44.25	14.7
		20.9	30.65	69.4	15.2
5.05	32.85	42.2	91.05	35.95	24.45
35.3		26.45	49.65	30.85	19.35
49.95	8	11.55	60.15	38.6
21.2	34.75	50.2	19.8	35.5	7.95
34.6		42.55	31.45	15.9	35.65
38.15	20.75	34.8	4.3	70.7	8.7
19.95	40.15	8.4	8	16.9	10.35
	24	26.3	9.8	15.85	16.1
13.05		60.85	92.4	6.8	16.15
12.35	25.45	26.5	56.05	12.05	17.4
6.1	9.05	19.75	46.05	12.2	12.25
4.95	93.15	27.95	30.6	28.95	16.55
	32.95	12.55	11.85	38.7	11.45
13.7			41.8	42.5	19.35
22.75	14.75	15.65	24.05	91.4	16.5
47.7	184.5	24.6	28.05	23.9	16.75
	60.9			35.75	16.55
35.2	225.15	9.95	5.8	27.5	24.85
73.5	5.1	17.6	5.4	26.1	10.65
53.85	64.35	7.45	9.1	53	11.95
143.5	32.65	33.45	5.95	122.25	10.55
10.1	37.35	8.65	6	23.55	9.55
	32.95	79.35	8.25		9.75
	158.65	7.4	17.8	12.7	16.45
	78.15	8	27.7	18.7	65.7
	45.5	7.6		9.35	40.1
		9.2	4.1	43.25
	66.45	14.4	7.8	9.6	10.1
	34.8		12.6	52.05	15.8
	82.7	10.65	2.95	27.8	11.55
	10.05	11.05	8.6		9.65
	26.35	5.45	148.4	24.85
	6.15	9.55	4.15	44.1	8.95
	14.25	11.8	7.15	15.6	16.25
			7.95	7.8	11
	58.45		19.95		7.65
	4		10.05	12.15	8.55
	15.3		12.3	6.5	12.2
			7.55	12.95
				16.2	11.85
				24.9	14.4
				9.55	37
				12.45	6.7
				13.45	11.4
				8.55	21.7
				6	13.5
				8.8	32
				6.55	79.95
				17.6	47.5
				12.8	6.2
				11.45	4.5
				10.65	11.75
				19.3	13.35
				22	9.25
				16.3	7.3
				11.45	17.2
					27.55
					27.35
					14.9
					18
					10.8
					22.95
					47.1
					90.65
					36.7
					14.3
					43.7
					15.75
					9.6
					17.6
					16.45
					16.7
					11.7
					4.05
					15.55
					11.95
					31.5
					7.6
					24.45
					13.15
					10.25
					16.35
					24.5
					25.7
					33.3
					21.6
					18
					42.65
					21.95
					13.55
					21.15
					15.75
					6.5

## Sheet: G0 bound
Dark-field	Bound dwell time		E236A-WT	G0	Fig.5-suppl 3
ATP conc	uM
5	10	20	50	200	1000
0.63605	0.35965	0.83775	0.21385	0.06775	0.9206
1.4438	0.1082	0.46175	0.49315	0.1784	0.28745
1.45155	0.913	1.07725	0.31325	0.0496	0.04515
0.1198	5.90455	1.4832	0.7321	0.12255	0.44835
3.111	1.05725	0.2394	0.44835	0.1227	0.38495
2.025	3.2851	0.5593	0.0641	0.0384	2.7486
1.0227	2.09975	1.29555	0.16335	0.0301	0.1031
0.6107	0.76035	0.28885	0.51595	0.252	0.54255
0.46685	0.98825	0.45205	0.0251	0.0783	0.2195
0.21665	1.0824	1.0114	0.2841	0.0425	0.27695
1.34195	1.6251	1.71335	0.15185	0.038	0.1998
1.5371	0.08115	0.7324	0.87465	0.3047	0.82065
1.34705	0.2405	0.1451	0.21235	0.15275	0.53865
0.5396	1.1543	0.08075	2.04305	0.16515	1.0972
0.24495	0.4992	0.0897	1.1179	0.1053	0.06585
0.0666	0.1134	0.58875	1.9016	0.059	0.70145
1.38675	0.41635	0.62325	0.461	0.1304	0.0994
0.2439	0.54685	0.4499	0.43115	0.07155	0.7623
2.5287	0.8821	0.20035	0.6408	0.0701	1.31685
1.09395	1.35505	0.53645	0.4349	0.1122	0.68155
1.67965	0.7213	0.2869	0.2391	0.05755	0.1502
4.9076	0.82095	0.1684	0.54245	0.0325	0.2887
0.23725	0.85255	0.83075	0.4455	0.0283	0.5639
1.0331	0.32845	1.79605	0.10715	0.06465	0.97195
0.26855	1.06355	0.2914	0.09225	0.1312	0.8276
1.93465	0.0843	0.4112	0.7335	0.17445	0.21065
0.23715	0.2741	1.95485	0.2365	0.19195	0.78535
1.033	0.10305	0.04	0.35485	0.1663	0.39265
0.26265	0.0526	0.0913	0.1645	0.0321	0.5469
1.93315	0.318	0.16755	0.2112	0.19975	0.5974
1.42525	1.11605	0.0245	0.09425	0.08685	0.1148
0.3612	0.1153	0.1848	0.2897	0.2203	0.14955
0.2823	0.46855	0.07175	0.5642	0.2073	0.15425
0.837	0.4019	0.35225	0.6563	0.02835	0.06645
0.0598	0.16875	0.1324	1.1064	0.07055	0.0369
2.1495	1.3153	0.132	0.12255	0.07	0.73115
0.80475	0.78285	0.32335	0.5126	0.1983	0.20995
2.12085	0.55895	0.10275	0.60875	0.12655	0.81315
0.14355	0.9694	0.5312	1.6664	0.0541	0.05555
0.3288	0.8843	0.34005	0.0338	0.04235	0.065
0.41015	1.32135	0.075	0.3049	0.25005	0.06465
0.9649	2.8001	0.07985	0.76635	0.4648	0.4152
	0.4003	0.3634	0.02065	0.2632	0.09175
	6.28775	0.80515	0.45385	0.14405	0.07
	0.97035	0.1355	0.14185	0.04975	0.42285
	1.14285	0.1106	0.45145	0.2544	0.1354
	2.0785	0.08015	0.7975	0.12105	0.3739
	0.88885	0.4528	0.2572	0.5421	0.321
	1.70095	0.3375	0.0873	0.33015	0.22185
	1.2871	0.0308	0.14755	0.1138	0.0381
		0.0945	1.4684	0.41665	0.6951
		0.04095	0.1377	0.15165	0.1032
		0.18255	0.05915	0.1	0.06675
		0.28955	0.31385	0.2009	0.75985
		0.3114	1.4986	0.3147	0.53525
		0.236	0.05355	0.0419	0.22605
		0.1274	0.16295	0.0829	0.021
		0.0763	1.4643	0.31195	0.0956
		0.03095	0.88785	0.10295	0.1628
		0.26315	0.31535	0.5092	0.18245
		0.0829	0.0779	0.03845	0.09405
		0.0527	0.0215	0.05545	0.1433
		0.51675	0.55245	0.0286	0.24205
		2.2794	0.6393	0.62695	0.14755
		0.64615	0.25035	0.0971	0.1862
		0.2129	0.4853	0.4058	0.0288
		0.6669	0.07365	0.19445	0.25485
		0.52475	1.23195	0.0926	0.06045
		0.52295	1.09575	0.26165	0.15
		0.56815	0.0614	0.42505	0.0557
		0.2978	0.4078	0.1532	0.65415
		0.3233	0.19745	0.22155	0.2089
		0.6715	0.02595	0.1004	0.45695
		0.80315	0.53845	0.0822	0.21055
		0.6261	0.16295	0.17815	0.49765
		0.76785	0.3833	0.08985	0.20915
		2.1511	0.16085	0.16755	0.06975
		2.8824	0.22025	0.5873	0.20075
			0.3298	0.0207	0.057
			0.42425	0.1813	0.35985
			0.26245	0.0635	0.05645
			0.5187	0.1482	0.21625
			0.13835	0.10685	0.1501
			0.25895	0.33155	0.022
			0.13565	0.3632	0.2139
			0.34715	0.0653	0.1611
			0.2142	0.16125	0.37835
			0.16405	0.14755	0.04885
			0.04115	0.0506	0.2954
			0.04375	0.38215	0.07505
			0.07255	0.1098	0.0666
			0.02035	0.2375	0.20475
			0.2906	0.1966	0.0536
			0.056	0.2095	0.2522
			0.26955	0.10295	0.06485
			0.61585	0.12895	0.0591
			0.1889	0.1431	0.11485
			0.1793	0.89865	0.08535
			0.0527	0.0697	0.12575
			0.13485	0.0456	0.0781
			0.2633	0.12265	0.347
			0.06845	0.09975	0.23515
			0.08275	0.04505	0.02295
			0.16795	0.14485	0.0594
			0.02545	0.04115	0.03305
			0.16255	0.1847	0.0681
			0.04085	0.57985	0.03405
			0.16165	0.2072	0.57235
			0.4186	0.0952	0.0285
			0.18555	0.08805	0.0334
			0.1101	0.1279	0.09935
			0.0804	0.144	0.2795
			0.1357	0.1684	0.03475
			0.1917	0.06715	0.15525
			0.06215	0.5006	0.0993
			0.0682	0.02575	0.0311
			0.18915	0.1811	0.2662
			0.04935	0.06075	0.0433
			0.1446	0.1495	0.2539
			0.2591	0.1047	0.23235
			0.068	0.0625	0.07715
			0.0376	0.2419	0.42295
			0.0748	0.3636	0.0962
			0.0743	0.0636	0.2045
			0.37385	0.16945	0.0689
			0.2076	0.09465	0.2433
			0.04015	0.07925	0.06235
			0.07655	0.0513	0.02025
			0.04575	0.38255	0.1385
			0.09285	0.1102	0.09135
			0.315	0.457	0.03495
			0.23235	0.06115	0.0351
				0.1475	0.02985
				0.105	0.17215
				0.1255	0.06805
				0.1439	0.0699
				0.1776	0.02305
				0.4602	0.13645
				0.32595	0.04345
				0.0554	0.07015
				0.1239	0.0701
				0.1072	0.0788
				0.12175	0.02365
				0.07075	0.0801
				0.04125	0.0313
				0.1644	0.0303
				0.1392	0.03235
				0.1305	0.04195
				0.08195	0.0319
				0.12525	0.0615
				0.20885	0.0713
				0.10565	0.03385
				0.218	0.0307
				0.25875	0.0599
				0.52775	0.0328
				0.02125	0.0814
				0.51905	0.03625
				0.1505	0.06905
				0.2476	0.0298
				0.3487	0.05025
				0.28975	0.04485
				0.03655	0.0819
				0.17525	0.0304
				0.0287	0.07995
				0.04975	0.03645
				0.11125	0.0323
				0.14215	0.06925
				0.05295	0.03115
				0.296	0.06455
				0.36675	0.0293
				0.26585	0.03295
				0.0623	0.065
				0.31975	0.0266
				0.04315	0.05955
				0.0837	0.0425
				0.05795	0.0711
				0.12315	0.1304
				0.03575	0.0656
				0.3285	0.10585
				0.25555	0.03475
				0.1662	0.0669
				0.12055	0.04795
				0.28235	0.05355
				0.41205	0.04185
				0.03205	0.1303
				0.37835	0.0273
				0.0762	0.0706
				0.02445	0.0463
				0.3445	0.03775
				0.17375	0.03275
				0.3762	0.095
				0.07135	0.0442
				0.0529	0.12625
				0.3006	0.03665
				0.0961	0.0688
				0.24	0.0473
				0.04325	0.0342
				0.1223	0.05245
				0.0394	0.0411
				0.2011	0.2683
				0.03675	0.11555
				0.249	0.02595
				0.16285	0.1389
				0.05155	0.0518
				0.1147	0.05765
				0.2797	0.03105
				0.02095	0.0306
				0.0618	0.10945
				0.3184	0.0784
				0.073	0.0411
				0.16555	0.1039
				0.13965	0.02555
				0.1581	0.03945
				0.0675	0.0352
				0.19795	0.1198
				0.03095	0.1642
				0.4779	0.03715
				0.1885	0.029
				0.0555	0.0581
				0.2099	0.1111
				0.0213	0.15385
				0.227	0.0753
				0.1321	0.05625
				0.0763	0.19515
				0.0212	0.4885
				0.07895	0.05345
				0.17485	0.0939
				0.14105	0.0387
				0.06975	1.3874
				0.05475	0.17445
				0.14875	0.33385
				0.02685	0.6915
				0.20565	0.2912
				0.03995	0.3469
				0.04955	0.49285
				0.06325	0.27135
				0.08515	0.38165
				0.0332	0.26875
				0.02815	0.2598
				0.37685	0.0772
				0.34415	1.10715
				1.9614	0.2586
				0.2622	0.15225
				0.0938	0.91465
				0.09475	0.0387
				0.08955	0.1525
				0.1516	0.4446
				0.1413	2.1221
				0.3293	0.36365
				0.4549	0.83495
				0.1266	0.3072
				0.161	1.1642
				0.61235	0.1806
				0.20925	1.572
				1.1905	0.6487
				2.5155	0.533
				0.93355	0.8858
				0.32305	0.12815
				0.23955	1.5883
				0.29555	0.42765
				0.02805	0.0965
				0.05005	0.6637
				0.43995	0.11905
				0.47455	0.04285
				0.0316	0.0688
				0.86305	1.7221
				0.12755	0.234
				0.17565	0.69365
				0.34195	0.5592
				0.07955	0.2855
				0.1517	0.1756
				0.0387	0.1375
				0.1106	0.08625
				0.09915	0.17785
				0.22925	0.02015
				0.77705	0.1261
				0.20845	0.46035
				0.0885	0.04495
				0.13925	0.58745
					0.2464
					0.2122
					0.25115
					0.1024
					0.1003
					0.51825
					0.1846
					0.3579
					0.0499
					0.0378
					0.0549
					0.0297
					0.18935
					0.04365
					0.1434
					0.0509
					0.0263
					0.54515
					0.2292
					0.2037
					0.03875
					0.0377
					1.1389
					0.6175
					0.93035
					0.6274
					2.08955
					0.6963
					0.49
					0.5237
					0.0658
					0.04645
					0.0205
					0.22465
					0.5745
					0.09045
					1.6791
					0.72895
					0.24435
					0.4919
					0.0262
					0.29745
					0.0219
					0.232
					0.3418
					1.0987
					0.08545
					0.75425
					0.5809
					1.37135
					0.3357
					0.30225
					0.214
					0.0533
					0.63265
					0.04575
					0.3274
					0.04595
					0.3473
					0.0616
					0.202
					0.6688
					0.0652
					0.2483
					0.03905
					0.0685
					0.16515
					0.1739
					0.09005
					1.95315
					0.37115
					0.51695
					0.7518
					0.66625
					2.10465
					1.5441
					0.70725
					0.5396
					3.0524
					0.1464
					0.0596
					0.063
					0.2568
					0.1627
					0.0334
					0.1399
					0.2715
					0.10965
					0.07835
					0.2025
					0.1466
					0.03345
					0.13825
					0.06865
					0.0679
					0.17825
					0.30935
					0.07055
					0.0623
					0.0783
					0.1742
					0.18725
					0.02525
					0.03795
					0.14635
					1.36465
					0.2645
					0.085
					2.42735
					0.1242
					0.9543
					0.0513
					0.2221

## Sheet: G7 unbound
Dark-field	Unbound dwell time		E236A-WT	G7	Fig.6-suppl 2
ATP conc	uM
5	10	20	50	200	1000
38.3	0.55	11.25	9.95	1.5	19.05
82.8	3.5	3.7	6.3	1.1	5.75
12.95	29.4	1.7	73.4	24.9	12.1
21.05	9.7	1.1	30.95	37.5	18.8
0.8	12.8	2.05	9.3	61.05	41.4
26.9	11.45	9.05	20.85	24.15	2.7
2.75	0.7	26.6	8.4	0.85	4.1
7.35	6.95	1.8	4.85	12.8	11.45
33.75	1	16.75	1.9	65.2	3.65
6.25	6.3	11	6.25	0.2	6.45
9.45	3.1	3	26	26.3	2
42.8	0.85	7.6	41.55	8.1	1.35
7.8	0.9	2.6	4.3	1.9	1.15
48.65	1.65	8	18.6	6.2	13.25
7.6	5.35	9	1.8	2.7	26.35
37.1	33.75	5.3	1.9	1.75	3.35
3.35	6.55	4	2.5	0.85	3.9
3.45	0.8	2.85	40.3	18.2	15.5
15.25	8.45	1.45	14.95	14.15	7.85
6.3	0.6	17.1	4.15	16.65	2.35
9.55	13.8	0.4	9	3.35	31.2
14.65	1.8	5	15.95	5.95	13.75
13.6	2.6	5.5	3.85	16.95	4.6
14.65	2	23.3	4.6	32.3	3.6
2.55	12.2	6.9	10.1	11	13
12.2	1.9	1.65	16.55	7.2	1.1
13.85	1.8	2.65	3.95	12.85	3.1
1.85	10.45	8.25	3.95	4.65	29.95
20.4	9.8	1.6	23.95	18.15	7.25
17.3	0.95	4.95	12.6	14.05	15.05
5.85	15.1	6	16.5	91.65	6.35
3.25	0.8	0.35	19.75	10.15	0.6
3.7	1.25	3.65	8.2	6.65	30.3
2.45	18.85	2.6	8.6	3.1	0.9
5.4	3.15	15.05	0.95	6.15	0.9
1.4	10.05	19.2	6.05	5.6	51.7
0.25	7	2.85	3.7	14.9	82.45
5.25	5.3	1.5	14.2	1.55	3.45
1.25	1.35	2.25	4.7	1.85	1.8
0.7	19.35	12.5	0.75	2.3	14.6
7.2	2.35	9.5	1.3	5.3	9.25
4.2	1.2	1.6	1.2	6.35	2.4
8.65	56.6	17.65	2	6.45	20.6
1.8	1.35	20.85	14.6	8.9	0.7
0.15	4.4	1.3	12.2	15.15	1.6
0.25	34.55	77.95	4.8	4.05	1.85
0.1	0.9	1.45	1.45	23.15	2.55
1.95	4.7	5.45	4.4	2.55	11.85
5.95	1.7	0.75	3.65	0.4	22.75
3.15	9.7	1.95	2	2.65	7.85
0.2	2.2	0.8	6.95	22.5	4.05
2.05	12.9	154.95	8.2	4.6	0.8
0.3	3.95	11.6	4.15	2.25	1.3
19.6	9.45	93.5	1.95	2.35	6.75
12.55	29.4	2.25	0.35	19.85	2.2
0.2	8.2	9.7	0.35	17.25	0.5
0.8	2.85	16.6	6.75	0.35	3.05
3.4	10.25	11.15	1.45	4.7	0.4
19.95	2.95	0.7	17.4	6.2	2.45
2.7	10.3	0.2	4.6	5.8	36.15
241.55	17.15	6.7	1.75	6.15	3.35
0.85	26.85	2.65	9.1	4.65	0.7
29.95	1.55	2.8	5.55	8	0.85
1.45	21.35	8.25	1.2	11.9	129.35
6.1	12.35	12.15	9.75	6.5	9.15
2.35	63.3	5.4	33.45	19.75	8.15
15.2	3.35	6.95	1.45	19	0.4
14	16.25	0.05	6.45	20.2	0.5
1.55	2.65	16.8	4.45	18.05	12.9
11.05	4.6	1.5	1.85	22.65	0.7
2.95	0.6	4.05	5.8	1.25	0.85
33.15	2.6	1.5	10.2	2.5	56.1
23.05	19.35	1.5	10.95	5.6	2.55
13.25	1.15	1.05	13.9	38.3	3
23.75	17.75	5.25	2.35	0.6	32.35
27.25	0.75	0.75	10.85	25.65	15.8
2.3	2.4	0.4	5.7	1.05	0.75
6.2	3.55	2.8	1.25	4.8	16.75
1.2	1.55	1.3	12.95	0.45	46.15
19.25	7.55	0.7	23.4	0.7	4.3
2.5	1.45	2.95	1.3	10.65	0.7
2.5	4.25	6	0.6	0.6	0.85
1.65	18.45	0.75	1.25	3.65	0.5
1.2	0.95	0.2	1.55	6.25	1.85
3.5	9.75	2.95	1.1	1.4	3.95
3.2	1.95	1.45	1.15	6.05	30.15
3.6	1.75	5.7	8.7	6.65	1
2.05	10	0.65	4.05	0.55	1.55
13.8	5.5	0.05	2.15	5.4	0.65
7.55	9	4.6	2	15.55	53.95
3.4	1.7	0.75	2.25	6	1.05
0.6	9.55	2.05	14.6	10.65	161.15
2.1	4.7	1.7	36.9	53.8	0.55
1.95	31.45	2.25	1.55	6.85	0.55
0.05	1.75	1.6	0.75	29.75	0.7
10.75	0.85	0.55	2.3	25.3	4.5
17.35	1.85	8.5	5	6.25	1.7
14.6	3.6	1.95	5.75	5.5	33.05
7.7	1.25	2.1	7.7	15.7	1.9
6.1	3.35	2.15	3	1.55	2.45
0.7	4.35	2.5	2.2	5.95	1.05
0.3	1.65	2.75	4.25	2	6.25
2.85	9.7	0.8	43.7	0.55	2.75
13.05	1.95	0.2	1.95	3.4	1.4
25.3	9.95		28.9	69.6	9.4
11.1	2.05		13.05	1.3	4.45
7.6	25.3		23	129.9	1.45
13.9	11.15		1.6	1.75	0.8
1.15	18.9		12.4	17.25	26.05
13.75	36.6		4.75	3	50.05
0.8	0.5		1.6	8.3	1.8
8.55	1		6.75	5.2	8.35
0.05	0.7		12.1	2.65	0.95
0.4	0.6		2.5	6.55	20.95
8.35	0.4		1.8	0.65	9.25
0.4	0.85		1.3	6.1	162.55
0.25	1.95		1.6	11.25	7
2	14.85		2.3	22.4	17.8
5.8	6.35		9.15	3.45	29.5
20.65	1.25		4.9	4.3	13
15.55	12.55		0.75	13.6	9.15
5.5	1		13.4	5.65	28.85
8.2	8.75		12.35	1.6	31.1
7.4	12.1		1.25	2	86.3
2.85	7.3		1.2	4.55	136.5
4.4	23.25		0.65	7	5.1
	4.5		4.1	4.7	22.25
	4.25		10.5	4.95	58.8
	1.65		10.75	4.1	78.95
	23.9		9.4	0.65	0.75
	1.5		0.75	8.4	6.15
	3.75		4.75	6.45	6.35
	0.8		2.1	9.5	1.3
	6.65		1.65	23.2	4.65
	1.15		7.7	10.05	1.35
	5.05		1.1	0.75	1.75
	17.3		1.6	2.45	1.2
	1.3		0.45	4.35	14.85
	1.95		30.35	2.7	1.3
	8.1		1.35	1.45	20.4
	6.05		4.35	4.15	3.4
	15.7		0.7	5.5	2.8
	12.3		11.65	2.2	1.15
	4.05		6.9	2.2	0.85
	16.65		2.65	3.3	5.8
	1.8		1.5	1.75	6.2
	10.35		14.2	2.8	116.7
	9.55		3.1	13.6	1.05
	3.3		0.95	14.45	1078.9
	13.95		8.95	1.95	0.15
	3.05		1.95	1.75	2.85
	3.15		6.8	5.4	5.9
	4.15		131	2.95	3.65
	19.65		2.9	1.05	1.45
	1.7		1.35	5.3	2.45
	6.5		2.45	7.45	0.45
	1		1.2	0.9	1.4
	11.55		0.9	0.4	3
	1.05		1.35	0.95	3.1
	8.2		12.85	10	0.05
	7.85		8.5	2.35	1
	23.4		8.85	1.3	0.85
	1.75		1.05	4.4	14.95
	1.6		2.35	0.85	1.25
	1.9		7.9	1.8	1.3
	14.45		1.75	3.25	0.1
	1.15		1.6	0.35	0.95
	4.55		9.85	0.4	0.85
	14.4		1.65	3.4	3.4
	1.1		1.65	0.95	2.55
	0.95		1.4	0.3	0.45
	12		10.9	0.45	0.8
	19.2		6.35	0.55	18.95
	3.9		2.85	2.05	0.85
	0.55		29.1	0.4	1.25
	34.2		5.1	0.75	18.95
	19.4		1.5	4.4	0.45
	6.5		8.6	12.1	4.1
	32.15		0.5	0.95	0.65
	11.6		1.5	1.05	11.95
	34.65		2.45	1.5	9.85
	4.15		0.35	1.95	0.45
	1.35		6	6.75	1.35
	1.3		10.95	0.85	1
	1.75		4.25	17.05	1.2
	2.6		18.9	9.5	1.05
	3.25		10.5	4.75	1.2
	0.8		0.9	2.1	1.55
	47.5		17.6	0.75	21.85
	3.05		0.95	0.65	10.8
	9		6.2	2.4	10.4
	5.65		13.5	1.85	202.75
	18.15		1.3	9.7	49.15
	2.75		3.65	2.85	28.6
	12		5	2	39.45
	4.6		16.2	2	1.85
	6.05		4.15	6.5	34.5
	7.15		15.45	50.9	45.95
	1.95		5.65	2.25	1.9
	1.9		1.2	7.5	100.15
	2.65		1.05	2.1	72.9
	2.85		32.45	2.6	13.5
	1.1		17.95	1.5	47.25
	5.6		40.05	6.8	47.45
	1.05		0.95	0.8	20.35
	1.75		20.2	7.15	10.5
	0.85		2.65	8.45	1.15
	10.85		0.55	2	41.65
	6.55		15.95	6.95	69.45
	19.05		18.4	16.3	15.75
	2.15		1.05	1.1	14
	46.15		35.05	1.05	188.7
	13.35		3.9	5.05	15.9
	28.1		1.95	7	47.2
	1.35		1.4	2.05	80.85
	5.7		29.4	0.7	96.1
	22.65		3.15	0.6	1.85
	6.55		6.8	0.65	2.35
	3.7		20.35	6.85	8.25
	24.3		32.05	1	5.4
	4.05		0.75	1.85	8.85
	4.6		1.05	11.1	9.7
	14.7		0.4	9.15	39.75
	13.2		0.8	1.95	2.6
	17.4		1.85	8.35	0.8
	4.45		5	2	6.15
	1.3		13.75	1.25	4.5
	5.15		1.9	0.9	1.15
	10.8		3	0.5	17.05
	17.6		1.3	1.5	11.45
	44.85		25		5
	5.75		2.45		2.6
	2.3		7.8		1.25
	1.9		3.85		8.3
	9.55		0.4		24.05
	4.1		1.45		16.25
	9.55		14.8		9.15
	15.7		7.4		1.05
	3		1.05		1.6
	6.85		12.95		28.35
	6.8		20.7		10.85
	14.45		11.2		19.1
	1		32.85		2.5
	3.3		22.55		23.8
	29.35		11.7		2.45
	0.95		13.75		22.1
	18.7		45.7		16.45
	21		1.25		5.9
	9.9		34.75		36.8
	3.45		5.2		30.5
	5.45		20.3		6.35
	15.4		7.75		8.75
	0.6		1.15		6.9
	1.35		3.75		23.7
	3.4		0.8		35.3
	5.25		18.8		25.5
	1.75		1.4		12.3
	26		20.5		13.2
	9.3		1.3		29.8
	0.7		1.45		1.1
	3.35		1.45		2.9
	1.05		0.8		2.75
			0.8		28.3
			0.7		146.7
			1.1		87.15
			1.05		0.4
			0.8		1.45
			0.85		1.05
			11.15		73.55
			1.15		1.7
			2.8		36.25
			0.8		3.95
			0.55		3.75
			14.5		0.8
			0.9		4.85
			26.4		22.8
			12.7		12.2
			2.65		2.7
			16.95		17.25
			3.45		8
			30.75		40.2
			1		28.05
			12.55		11.55
			20.15		74.85
			19.7		34.1
			10.3		1.1
			40.45
			18.75
			6.95
			4.85
			10.05
			22.15
			2.8
			8.7
			8.45
			0.3
			2
			27.3
			4.95
			1.5
			3.4
			4.85
			73.8
			5.35
			0.9
			0.7
			3.05
			0.55
			0.4
			0.6
			0.3
			0.1
			0.6
			0.05
			0.1
			0.1
			0.05
			0.95
			0.05
			0.2
			0.05
			1.15
			18.65
			1.95
			3.25
			0.5
			0.55
			0.6
			0.35
			8.95
			0.05
			1.6
			0.75
			0.5
			0.35
			0.45
			0.65
			0.35
			0.7
			0.1
			0.45
			0.3
			1.15
			4.95
			7.95
			0.65
			20.8
			4.05
			0.7
			2
			1.15
			7.3
			0.5
			1.6
			0.2
			6.35
			3.5
			6.95
			1.3
			0.65
			1.2
			0.65
			9.15
			1.25
			3.45
			2.85
			8.75
			2.05
			0.4
			0.2
			0.6
			0.1
			0.2
			5
			6.85
			1.15
			2.45
			0.85
			5.75
			1.2
			0.5
			0.45
			3.3
			16.1
			31
			7.4
			4.1
			4.65
			5.2
			16
			6.8
			12.1
			8.7
			11.5
			11.5
			3.7
			17.7
			5.95
			4.5
			22.2
			2.2

## Sheet: G7 bound
Dark-field	Bound dwell time		E236A-WT	G7	Fig.6-suppl 2
ATP conc	uM
5	10	20	50	200	1000
0.21615	1.08215	0.3281	0.03595	0.0773	0.07125
0.02555	0.5582	0.0733	0.0284	0.1417	0.03025
0.09555	0.5352	0.2358	0.0604	0.24305	0.14365
0.0622	0.68825	0.03425	0.21345	0.12515	0.0958
0.4078	0.03975	0.11435	0.1628	0.4407	0.09665
0.07815	1.4589	0.71215	0.03205	0.23255	0.04885
0.02185	1.80175	0.0539	0.02065	0.055	0.298
0.4398	0.0611	0.5247	0.26195	0.12315	0.10725
1.49785	0.5988	0.25845	0.0228	0.01235	0.02185
0.0935	0.028	0.0342	0.0194	0.62815	0.10235
1.4014	2.54575	0.4279	0.06405	0.2459	0.08135
0.05155	0.2771	0.6358	0.1258	0.4492	0.0306
0.4554	1.1102	0.05335	0.01385	0.34885	0.04655
0.12775	0.5453	0.4939	0.12935	0.1255	0.0661
0.1739	0.1431	0.02035	0.173	0.1949	0.0311
0.2558	0.3617	0.10355	0.19875	0.3093	0.1849
0.92295	0.2665	0.1906	0.11355	0.0192	0.02695
0.03605	0.2418	0.04205	0.2426	0.44135	0.17235
0.6119	0.03085	0.1653	0.2118	0.05415	0.0683
0.12315	0.3009	0.05695	0.40625	0.06375	0.02575
0.47755	0.44905	0.2458	0.13995	0.04715	0.047
0.37295	0.31535	1.57525	0.11605	0.08645	0.48785
0.1912	0.078	1.63035	0.13325	0.04785	0.76525
0.17125	0.7463	2.3405	0.1791	0.11185	0.27975
0.4736	0.7867	0.0489	0.2209	0.01895	0.0427
1.92105	0.11645	0.1529	0.18	0.07405	0.06005
0.8068	0.0484	0.0795	1.3002	0.1485	0.20075
1.6133	0.06305	0.283	0.17615	0.02375	0.0261
0.87865	0.1589	0.8057	0.3388	0.0147	0.04775
0.5847	0.1113	0.0491	0.10535	0.0973	0.06915
0.3557	0.04165	0.22265	0.0161	0.0105	0.04065
0.0058	0.1114	0.7447	0.9742	0.0693	0.0357
0.3336	0.19665	0.47215	0.12035	0.3954	0.0446
1.3066	0.6139	0.12785	0.39155	0.17825	0.35095
0.2858	0.2357	0.88985	0.11465	0.65345	0.10155
0.49055	0.40315	0.09875	0.43105	0.24285	0.36335
0.0034	0.0167	0.4455	0.14585	0.20965	0.16565
0.43375	0.27115	0.17835	0.13835	0.2639	1.25205
0.64775	0.565	0.56655	0.12875	0.02385	0.02345
0.0127	0.1152	0.6543	0.5769	0.1554	0.09545
0.8531	0.07475	0.54625	0.5033	0.09295	0.0404
0.4424	0.38725	0.57595	0.1015	0.1083	0.6125
0.1251	0.2719	0.2994	0.08775	0.04885	0.02715
0.6423	0.75895	0.46535	0.05665	0.0934	0.19645
0.18895	2.55125	0.1216	0.05955	0.02355	0.23115
0.51375	0.0205	0.66685	0.08355	0.2042	1.0715
0.54905	0.73835	0.1454	0.03005	0.0633	0.4861
1.3825	0.0284	0.336	0.0953	0.07455	0.2985
0.0922	0.02925	0.5215	0.1203	0.34305	0.2402
0.0854	0.19565	0.03315	0.0477	0.08	0.0579
0.31345	0.211	0.1804	0.8274	0.02395	0.12825
0.49175	0.0297	0.58555	0.0376	0.2846	0.28605
0.18065	0.1068	0.00575	0.1743	0.18925	0.34935
0.95375	0.211	0.65175	0.9287	0.0742	0.89635
0.0177	0.1467	0.4414	0.02735	0.0474	0.08895
0.0228	0.96995	0.19275	0.4745	0.0415	0.6649
0.01935	0.23585	4.97145	0.83745	0.0133	0.10725
0.6445	0.2677	1.4444	0.54895	0.07715	0.02225
0.06555	0.2379	1.3595	1.03105	0.0607	0.0319
0.0865	0.30635		1.3969	0.3532	0.04995
0.04535	0.8075		0.23525	0.168	0.1565
0.39995	0.61065		0.20035	0.24595	0.12325
0.5196	0.08265		0.36615	0.1012	0.59505
0.79585	0.2034		0.01545	0.04735	0.7155
0.1559	0.1616		0.1403	0.3957	0.15035
0.00275	0.0399		0.08675	0.8014	0.7984
0.4644	0.03505		0.00605	0.1116	2.1609
0.0228	0.20755		0.09235	0.01315	1.811
0.45245	0.36525		0.7704	0.08675	0.1798
0.4569	0.3766		0.93145	0.132	0.5336
0.10685	0.8698		0.3629	0.1479	0.31345
0.07855	0.1107		0.49	0.0797	0.0376
0.07365	0.3188		0.0067	0.0251	0.48335
0.05395	0.2416		0.26995	0.17905	0.0265
0.52495	0.08335		0.1486	0.04105	0.08315
0.553	0.10555		0.62505	0.0385	0.0555
0.00595	0.2761		0.00825	0.14105	0.02725
0.0271	5.13935		0.10895	0.0466	0.0355
0.00295	0.80695		0.2429	0.22625	0.0909
0.7775	0.0955		0.57705	0.08115	0.18915
0.09905	0.18075		0.59815	0.01245	0.07035
0.1254	0.60505		0.0078	0.0393	0.10915
0.02615	0.1813		0.1138	0.4008	0.0271
0.0393	0.02905		0.01935	0.0779	0.0769
0.5556	0.17345		0.0657	0.01635	0.0465
	0.77355		0.498	0.2199	0.06025
	0.06175		0.18215	0.30055	0.06005
	0.34185		0.17875	0.0825	0.376
	0.436		0.60245	0.1627	0.11845
	0.94155		0.0684	0.0544	0.0738
	0.13885		0.16925	0.21745	0.1831
	0.04025		0.06715	0.0121	0.05575
	0.51155		0.10725	0.0195	0.02325
	0.1937		0.01235	0.01545	0.0511
	0.12615		0.28025	0.0342	0.00545
	0.29155		0.134	0.04245	0.1666
	0.07665		0.3113	0.14825	0.14195
	0.9432		1.0976	0.012	0.16495
	0.3778		0.17265	0.0387	0.1576
	0.2374		0.0891	0.0905	0.0076
	0.4523		0.42575	0.0526	0.05545
	0.60305		0.46155	0.12975	0.0102
	0.12565		0.68055	0.1104	0.01065
	0.05765		1.0504	0.16075	0.04435
	0.1314		0.1827	0.14765	0.04795
	0.0292		0.8737	0.016	0.77275
	0.2321		2.28565	0.08155	0.27435
	0.2766		0.5609	0.16455	0.2711
	0.22475		0.28595	0.1643	0.06525
	0.2657		0.2485	0.02825	0.05175
	0.07065		0.286	0.0258	0.08795
	0.23905		0.14185	0.08955	0.12225
	0.09215		0.64135	0.1766	0.171
	0.0454		0.05525	0.1275	0.4323
	0.12215		0.6303	0.05715	0.25905
	0.1542		2.5509	0.15605	0.85735
	0.09905		0.72655	0.0779	0.24285
	0.09415		0.68325	0.0705	0.3228
	0.99135		0.06325	0.02715	0.3862
	0.24695		0.0612	0.0477	0.04095
	0.69195		0.5084	0.0532	0.15
	0.08185		0.1939	0.0844	0.4341
	0.4198		0.34515		1.1878
	0.20345		0.4085		0.102
	0.4067		0.0099		1.03345
	0.37195		0.03085		0.59885
	0.11665		0.06195		0.6557
	0.17535		0.00385		0.7698
	0.2386		0.1032		0.76615
	0.54925		0.2553		1.10825
	0.386		0.01465		0.5947
	0.0358		0.1837		0.02885
	0.0688		0.03795		0.3516
	0.0554		0.1763		0.2869
	0.26605		0.29045		0.0647
	0.8316		0.45195		1.0153
	0.2577		0.1256		0.8731
	0.02915		0.1987		0.05185
	0.57385		0.9047		0.11375
	0.1379		0.1054		1.1293
	0.12795		0.3456		0.05325
	1.3588		0.14945		0.01135
	0.36045		0.5826		0.0184
	0.0728		0.5758		0.06055
	0.1349		0.05855		0.0659
	0.6762		0.2243		0.0638
	0.44115		0.03425		0.00985
	0.26765		0.5132		0.0163
	0.02645		0.36245		0.02375
	0.2368		0.29245		0.7718
	0.2557		0.972		0.0134
	0.305		0.04275		0.06015
	0.56635		0.6096		0.0234
	0.1746		0.682		0.03475
	0.4668		0.0496		0.0848
	0.50155		0.6846		0.2664
	0.3387		0.2027		0.1071
	0.08515		0.0638		0.1463
	0.598		0.14845		0.0338
	0.06685		0.27915		0.1482
	0.15585				0.1289
	0.24255				0.00715
	0.09985				0.0404
	0.3787				0.2191
	0.3157				0.2365
	0.2357				0.1924
	0.26895				0.11865
	0.4836				0.1521
	0.1603				0.0242
	0.0598				0.08215
	0.4266				0.10785
	0.21125				0.18885
	0.304				0.04245
	0.12555				0.10825
	0.05965				0.08395
	0.1964				0.07505
	0.02745				0.4869
	0.21185				0.0304
	0.11855				0.1905
	0.37505				0.18855
	0.29865				0.46225
	0.0598				0.03035
	0.07815				0.1669
	0.62775				0.43485
	0.08205				0.315
	0.32935				0.19325
	0.17825				1.2263
	0.1384				0.2094
	0.1179				0.4445
	0.0933				0.14195
	0.22465				0.19415
	0.06335				1.01595
	0.30995				0.4118
	0.072				0.05885
	0.0576				0.4115
	0.1108				1.03845
	1.1959				0.251
					0.14195
					0.13305

## Sheet: G12 unbound
Dark-field	Unbound dwell time		E236A-WT	G12	Fig.6-suppl 3
ATP conc	uM
1	5	10	20	50	1000
8.15	1.75	1.3	18.9	2.7	14.45
7.3	7.95	30	0.3	3.85	23
9.2	1.95	2.95	12.55	3.75	99.8
8.9	30.5	39.35	0.85	3	28.65
2.4	14.3	33.4	1.55	2.45	1.15
7.6	14.9	5.9	16.45	10.55	2.05
9.55	11.6	23.95	173.8	4.65	29.05
9.7	31.4	2.95	13.1	8.5	50.95
6.25	15.45	29.3	3.05	2.5	18.2
4.5	2.65	4.7	106.8	3.1	21.5
2.4	14.75	1.8	6.05	1.1	1.85
6.95	2.8	1.3	8.5	6.4	9
17.9	11.65	22.4	3.5	1.6	4.95
4.1	12.05	3.5	8.7	9.55	17.95
1.1	1.55	5.4	3.8	3.05	1
1.35	0.65	11.2	5.3	4.4	1.6
1.15	30	3.2	14.1	2.55	2.55
10.9	14.9	9	12.8	1.9	6.2
0.95	13.85	2.6	0.8	11.65	3.65
0.95	11.3	4.7	102.8	2.15	1.75
7.05	34.25	27.2	6.05	1	5.9
17.65	2.2	16.7	6	1.3	3.1
4	15.25	14.8	0.4	1.25	8.25
8.9	3.25	26.45	2.65	0.9	9.7
2.65	14.9	18	7.8	2	1.2
1.05	15.9	30.9	7.8	0.6	2.75
1.3	11.9	72.15	27.95	9.8	12.75
1.55	6.4	7.65	11.85	0.75	2.2
0.85	7.8	22	6.7	11.9	2.75
5.9	22.3	33.25	3	0.35	5.2
6.8	0.55	5.55	2.9	2.95	43
27.05	8	4.15	3.85	0.3	1.95
1.45	15.4	8.65	1	6.6	15.8
5.5	13.7	25.85	11.15	0.3	1.8
2.6	26.15	7.95	1.5	1.15	7.15
2.85	0.65	35.5	26.75	0.7	25.4
5.65	11.8	7.95	1	1.65	3.25
83	6.05	15.65	7.5	1.5	34.9
20.4	3.85	9.8	13	0.3	15.7
	0.95	7.5	9	1.7	20.7
	18.6	43.5	4.3	5.25	21.3
	25.2	44.35	0.1	7.1	3.05
	42.75	4.25	3.15	0.35	37.3
	0.65	25.25	9.4	7.2	4.15
	0.45	25.3	2.7	1.15	5.2
	67.75	22.25	1	0.25	40.95
	79.55	144.85	0.3	4.5	5.8
	50.9	11.6	0.55	9.75	2.9
	117	8.7	6.1	0.8	7.25
	20.05	26.95	1.75	12.95	25.1
	46.8	92.05	1.55	1	1.2
	67.8	15.1	0.4	3.1	11
	161.6	12.15	0.7	0.85	21.7
	59.35	9.65	6.9	6.9	38.3
	10.85	12.7	3.4	0.4	2.25
	16.35	19.95	0.15	1.05	37.85
	11.2	15.45	0.9	5.85	3.85
	5.5	29	17.8	0.25	2.85
	4	28.65	0.85	14.85	4.2
	1.1	4.65	0.9	0.15	2.35
	7.65	15.95	0.85	7.2	1
	0.9	5.9	2.5	23.85	8
	15.5	20.7	11	14.3	1.8
	2.85	4.85	1.9	1.4	3.6
	14.8	7.95	1.5	5.5	11.95
	3.85	6.5	1.4	1.15	69.45
	3.95	24.15	1.45	0.8	25.75
	10.2	5.7	0.65	0.35	34.9
	15.1	130.85	5.45	1.8	3.25
	4.65	6.7	9.45	1.5	10.75
	20.5	9.7	56.3	0.25	2.25
	1.2	23.05	3.45	0.6	2.65
	3.45	0.75	0.95	0.4	1.4
	2.95	0.75	35.5	3.4	26.05
	3.8	1.25	2.1	1.9	20.85
	7.15	2.4	3.3	0.9	27.35
	26.25	1.25	1.8	0.3	8.35
	20.85	0.9	13.95	0.8	6.6
	21.3	1.95	10.85	1.35	13.2
	457.55	8.2	10.25	0.4	10.5
	9.3	4.35	4.75	0.45	8.45
	0.55	30.5	0.15	1.6	4.75
	0.7	17.5	0.15	3.3	19.55
	4.9	29.65	4.55	5.35	1.15
	16.2	33	5.6	2.55	5.65
	395.75	1.75	44.25	1.35	35.55
	114.4	4.35	1.15	3	3.5
	30.9	2.65	3.2	0.25	19.4
	2.65	1.2	1.2	5.8	12.95
	1.65	2.45	9.75	1.2	2.65
	85.85	10.5	0.85	0.3	8.7
	0.75	68.4	40.2	0.05	5.3
	8.8	6.8	4.45	0.75	55.3
	135.9	4.2	4.4	0.15	12.15
	3.8	68.2	0.6	6.75	1.65
	181.05	52.25	1.75	10.15	6.3
	18.8	2.7	0.15	3.8	1
	5.2	0.9	10	0.75	19.65
	1.85	33.9	0.2	0.95	1.1
	12.9	29.9	11.35	0.6	30.75
	3.4	4.65	1.2	8.85	32.7
	17.6	7.7	0.2	3.9	44.15
	30.55	22.6	2.05	6.1	23.05
	6.7	59.4	7.5	0.35	7.6
	2.6	1.75	2	10.35	6.45
	18.5	1.15	1.35	3.9	1.75
	16	21.8	6.15	11.4	34.1
	10.85	21.2	1.8	67.15	6.55
	3.1	4	2.9	406.25	4.85
	27.8	17.35	0.8	251.6	1.15
	6.55	13.35	0.25	597.8	35.85
	1.3	23.1	0.7	38.75	1.15
	3.8	13.85	1.2	321.2	3.15
	6.2	15.45	0.05	101.3	2.85
	17.6	16.75	0.7	70.25	4.3
	24.25	0.6	0.3	62.1	1.15
	3.3	1.7	18.6	74	2.75
	5.45	6.45	0.85	63.55	11.25
	11.1	4	0.65	14.05	13.9
	7.15	33.75	1.45	9.05	13.9
	14.6	1.45	1.1	309.6	3.8
	31.85	3.55	2.4	307.75	3.95
	10.4	1.6	0.4	78.1	1.8
	1.35	8.2	8.75	550.65	1.25
	3.9	3.45	2	724.9	3.5
	37.4	2.2	0.9	112.95	1.35
	7.95	4.2	4.5	1377.45	0.65
	6.2	8.1	28.95	9.3	2.85
	3.35	11.7	53.35	9.1	2.4
	49.3	3.65	51.3	5.6	2.35
	18	71.1	12.15	10.5	0.35
		15.4	39.25	10.45	11.8
		33.6	16.85	26.9	13.5
		10.8	57.65	0.2	4.9
		3.45	172.95	0.85	3.7
		11.25	3.45	0.25	0.8
		30.95	89.5	3.15	2.35
		4.15	216.8	0.85	4.65
		3.6	44.55	6.1	6.85
		3.85	81.1	12.95	6.45
		8.55	12.45	54.5	5.35
		1.45	4	5.65	0.8
		14.65	0.55	14.75	6.3
		6.35	3.2	0.7	0.6
		5.3	2.15	3.35	5.8
		1.85	2.6	43.7	5.75
		0.65	3.4	8.7	13.95
		3.15	7.65	9.05	0.05
		34.2	12.45	25.1	4.35
		15.45	9.35	30.3	17.25
		1.9	2.9	4.9	1.3
		3	1.5	6.9	1.55
		2.2	5.2	6.75	1.4
		17.4	28.5	2.6	0.6
		9.5	1.6	9.05	4.65
		3.25		2.4	1.95
		4.2		16	4.35
		2.1		8.35	5.55
		23.65		1.15	2.45
		2.35		2.65	7
		29.5		7.2	1.7
		1.45		14.85	4.05
		22.9		33.5	6.05
		26.7		8.55	1.1
		12.2		13.05	1.75
		8.85		23.6	8.65
		3		5.4	7.05
		23.85		3.05	0.05
		13.65		96.45	11.5
		15.75		51.2	0.3
		4.85		89.1	5.05
		1.7		4.95	0.3
		2.65		124.1	4
		5.15		29.3	0.3
		5.2		4.1	2.2
		5.4		37	2.25
		26.35		13.15	0.65
		29.5		105.3	1.55
		4.8		149.3	0.85
		3.1		1	7
		6.8		6.4	4.9
		135.1		9.4	0.05
		4		10.6	0.65
		7.5		1.25	6.85
		27.75		1.6	7.35
		11.15		125.95	0.85
		19		7.25	0.1
		19.55		28.95	1.65
		4		6.85	2.55
		13.25		129.6	0.25
		2.2		5.35	1.6
		0.65		1.75	0.1
		0.7		1.95	3.35
		7.75		8.55	0.4
		3.3		1.25	4.4
		1.35		3.75	18.15
		28.25		6.8	15.35
		5.95		29.5	5.5
		11.9		12.5	14.3
		3.65		29.8	2.55
		2.05		32.35	1.7
		23.3		12.75	1.65
		1.4		14.35	9.95
		24.3		14.05	0.1
		4.55		8.75	4.45
		1.35		27.8	3
		6.45		18.4	0.3
		5.15		6.85	0.1
		1.75		10.7	0.3
		12.8		74.95	1.85
		15.4		0.5	0.4
		2.85		0.05	1.25
		1.9		9.35	1.85
		20.7		5.75	2.7
		0.9		1.95	4.5
		7.45		17.45	1.4
		3.3		3.05	2.15
		9.55		7.6	2.35
		7.25		14.65	7.15
		24.45		5.65	0.65
		4.7		2.55	1.85
		2.6		7.05	1.9
		85.65		4.6	1.05
		1.95		0.3	0.15
		3.6		1.65	1.55
		2		2.25	0.4
		50.1		4.5	0.15
		4.6		9.5	2.35
		26.5		9.65	1.75
		131.05		14.45	3
		1.35		0.85	1.25
		11.6		11.1	0.4
		26.85		20.55	3.15
		66.05		0.3	1.05
		2.65		0.15	16.05
		49.45		9	8.55
		6.55		6.95	2.05
		40.55		0.65	2.1
		42.5		10.4	1.2
		74.5		0.45	1.2
		10		3.1	4.6
		45.55		1.7	5.9
		134.65		28	236.4
		43.3		17.3	43.85
		12.2		19.85	12.2
		57.9		77.3	58.85
		36.1		19.35	22.45
		161.65		0.05	35.6
		22.8		2.35	7.05
		13.95		11.05	8.05
		12.05		38.35	18.9
		10.65		11.15	7.2
		40.05		13.25	34.3
		25.1		38.9	121.6
		12.5		6.8	96.6
		2.1		7.65	17.35
		20.2		0.35	4.4
		7.85		10.65	0.85
		8.7		11.15	1
		14.3		5.3	31.65
		47.6		3.05	2.85
		3.9		3.9	20.95
		7.1		2.55	3.7
		6.2		2.15	2.45
		1.25		0.85	2.2
		2.25		9.55	0.6
		3.55		27.2	0.35
		22.6		1.25	1.75
		0.65		19.65	3.45
		5.85		11	0.3
		1.15		0.3	2.7
		23.15		0.2	59.45
		9.35		0.8	3.15
		1.1		7.2	8.7
		1.8		4.4	24.2
		2.05		17.55	2.9
		1.5		6.8	22.2
		18.35		3.75	4.95
		18.9		2.95	12.95
		1.75		4.65	14.65
		2.3		4.05	1.25
		1.15		16.25	2.1
		9.35		30.1	0.35
		5.2		0.05	1.1
		2.85		31.4	21.55
		13.4		6	4.15
		0.95		12.75	10.75
		1.2		14.5	1.15
		2.85		14.25	3.15
		6.6		8.35	9.5
		1.3		35.85	16.4
		1.25		19.05	19.95
		2.3		29.9	9.2
		22.45		74.45	35.2
		9.15		2.5	1.35
		5.95		9.45	5.2
		10.3		0.95	4.1
		72.45		8.1	19
		27.05		1.55	1
		5.3		18.25	8.05
		2.05		4.7	34.2
		1.25		0.8	20.85
		29.75		0.45	2.6
		142		8.7	2.85
		717.3		16.9	1.9
		42.35		6.35	52.65
		34.3		5.35	42.95
		90.3		7.75	1.35
		8.3		7.15	4.35
		46		0.45	10.6
		2.15		1.55	11.6
		57.5		3.25	6.05
		4.35		3.35	17.05
		1.15		5.4	5.8
		20.5		31.25	10.45
		21.7		15.15	29.45
		26.1		1.1	7.25
		28		0.95	1.75
		28.7		11.1	22.9
		13.05		16.9	38.2
		90.6		8.8	20.35
		37.6		2.25	12.2
		6.5		12.1	1.35
		15		1.85	211.55
		23		4.15	23.9
		14.3		2.55	1.95
		17.3		35	49.3
		9.15		20.5	8.9
		3.35		20.3	3.9
		25.75		79.5	38.75
		28.65		24.65	18.4
		22.95		1	7.6
		4.45		5.9	106.35
		2.1		12.15	10.85
		47.5		38.95	133.4
		4		11.55	5.3
		1.55		15.3	6.3
		39.85		33.65	9
		1.4		15.9	53.1
		15.15		12.15	3.35
		0.7		0.2	7.45
		3.75		11.35	74.8
		51.7		12.7	19.75
		6.8		6.05	103
		10.05		3.1	11.7
		24.3		19.55	1.4
		3.65		29.65	35.55
		9.35		4.75	2.2
		0.6		16.5	1.45
		8.2		40.95	2.85
		154.4		60.35	14.85
		27.05		27.6	2.2
		43		42.7	9.3
		25.15		6.45	16.8
		0.75		3.25	9.45
		26.15		18.95	18.65
		2.8		8.1	1.45
		53.95		3.55	8.3
		6		25.85	8.05
		0.35		1.25	4.7
		9.85		32.45	1.7
		2.85		2.25	17.95
		2.45		15.1	3.15
		11.4		6.3	2.65
		5.4		3.8	40.25
		8.75		2.3	1.65
		29.6		10.25	9.45
		1.7		2.7	10.55
		46.85		2.05	63.5
		13.25		2.5	3.65
		3		25.85	25.1
		135.85		5.15	18.6
		69		5.9	41.8
		8.8		4.8	12.9
		51.1		2	3.55
		16.45		43.4	3
		1.45		8.65	3.65
		3.65		1.1	3.55
		6.55		4.8	4.45
		20.45		0.95
		9.25		1.3
		9.1		8.3
		10.1		84.3
		1.55		3.5
		31.55		1.15
		16.6		15.95
		14.3		12.95
		1.7		1.85
		4.2		6.9
		1.6		9.1
		1.95		9.35
		1.95		15.85
		16.8		20.5
		7.05		12.7
		13.5		34.2
		10.25		7.75
		3.85		5.15
		2.35		5
		4.7		32.55
		5.35		1.2
		13.85		0.65
		7.7		5.95
		4.65		0.75
		0.5		0.7
		5.25		0.5
		26.35		0.95
		1.1		19.55
		10.5		4.35
		8.15		8.5
		210.4		1.55
		52.15		1
		139.05		4.6
		5.25		2.2
		2.05		10.25
		1.05		7.35
		1.35		4.1
		2.05		3.15
		21.1		1.5
		7.8		1.8
		84		1.35
		5.05
		13.65
		1.45
		42.5
		18.55
		17.35
		8.5
		47.05
		1.1
		2.55
		20
		2
		1.6
		37.75

## Sheet: G12 bound
Dark-field	Bound dwell time		E236A-WT	G12	Fig.6-suppl 3
ATP conc	uM
1	5	10	20	50	1000
0.1597	0.08345	0.20695	0.0188	0.0332	0.1641
3.45975	0.3045	0.05465	0.0052	0.12985	0.0896
0.52645	0.1307	0.0827	0.06335	0.9188	0.4361
0.56275	0.1194	0.08465	0.15075	0.2096	0.03675
1.8509	0.0318	0.0814	0.00275	0.0368	0.11645
0.4525	0.1715	0.03385	0.252	0.24225	0.4228
1.199	0.70745	0.1355	0.0985	0.13005	0.1217
0.0668	0.0336	0.1841	0.0522	0.034	0.2921
0.33585	0.0849	0.1515	0.08015	0.34615	0.1636
0.16665	0.4929	0.0222	0.0163	1.88755	0.1344
0.10455	0.1306	0.1753	0.0805	2.0461	0.0546
0.1508	0.1188	0.40965	0.12685	0.0679	0.17495
2.45595	0.03295	0.6043	0.0392	1.2887	0.0597
1.85125	0.1697	0.9466	0.1994	0.38685	0.03365
0.45255	0.7075	0.07315	0.22945	0.6609	0.0262
1.77385	0.0335	0.12735	0.02285	2.41115	0.04665
0.453	0.0803	0.30005	0.2252	0.11875	0.03785
2.4559	0.48375	0.16495	0.02025	0.0689	0.0554
1.2096	0.3653	0.0618	0.4794	0.09375	0.0421
0.6544	0.14315	0.05515	0.3291	0.22895	0.05045
0.2998	0.13065	0.2424	0.00345	0.0561	0.0981
0.55005	0.0541	0.02415	0.02655	0.0222	0.06255
0.20695	0.1655	0.02695	0.02045	0.08485	0.13935
0.3458	0.1074	0.02765	0.00465	0.01885	0.13455
0.37515	0.09645	0.07805	0.1245	0.03065	0.0414
1.57885	0.37405	0.1562	0.2329	0.0981	0.06955
0.05685	0.1033	0.24515	0.07575	0.15615	0.03435
1.0371	0.24135	0.09535	0.00245	0.2903	0.0356
	0.9389	0.28375	0.11125	0.1519	0.0899
	0.1091	0.0293	0.18785	0.3197	0.0237
	5.87145	0.19515	0.04375	0.0617	0.1546
	0.9876	0.17795	0.9581	0.0226	0.02495
	0.0141	0.4733	0.03515	0.07165	0.06055
	0.0717	0.38295	1.24365	0.0286	0.04765
	0.5876	0.17175	0.83865	0.11625	0.04645
	0.42995	0.09305	0.0623	0.06955	0.0256
	0.3162	0.2631	0.3204	0.0178	0.253
	2.20465	0.1182	0.09215	0.02535	0.04415
	0.39955	0.04995	0.3601	0.05475	0.0586
	1.73655	0.06925	0.1582	0.13035	0.12075
	0.2066	0.1631	0.0773	0.183	0.1175
	0.31555	0.31045	0.1795	0.0339	0.1737
	0.147	0.09665	0.0252	0.0385	0.1084
	0.58275	0.0968	0.36855	0.0372	0.0402
	0.52715	0.1762	0.0966	0.06965	0.12945
	0.9274	0.33355	0.71345	0.02335	0.06125
	2.09805	0.1237	0.04735	0.0932	0.0268
	1.53035	0.4384	0.12865	0.2268	0.02465
	2.11025	0.1963	0.13505	0.06505	0.05885
	0.56585	0.03045	0.2142	0.168	0.0614
	1.57375	0.07485	0.0625	0.0479	0.1204
	1.31595	0.1053	0.19525	0.01885	0.10825
	2.245	0.19715	0.0534	0.1161	0.1805
	1.01595	0.4753	0.30995	0.15065	0.07745
	1.0097	0.3619	0.141	0.06515	0.0688
	1.5719	0.0706	0.0796	0.03785	0.02955
	2.0317	0.0823	0.16245	0.0219	0.0233
	0.2105	0.2207	0.08785	0.21985	0.0213
	0.35255	0.07745	0.0215	0.1234	0.02885
	0.6607	0.209	0.24395	0.22275	0.02185
	1.0103	0.3443	0.02915	0.04215	0.06015
	0.22105	0.11725	0.25115	0.0721	0.02635
	0.2309	0.0317	0.07335	0.0735	0.1039
	0.11615	0.1078	0.08315	0.01535	0.0538
	0.02925	0.03865	0.432	0.0645	0.0489
	0.50335	0.2906	0.9746	0.031	0.0247
	0.08585	0.37005	0.20005	0.0133	0.0304
	0.36575	0.2259	0.1945	0.15405	0.04755
	0.19125	0.8527	0.55275	0.23555	0.0488
	0.37615	0.0538	0.23955	0.07995	0.11765
	0.0354	0.0739	0.5083	0.02495	0.1537
	0.039	0.79645	0.93185	0.01145	0.144
	0.303	0.24535	2.32095	0.0736	0.0235
	0.0209	1.40025	1.1438	0.02635	0.14165
	0.08605	0.51875	0.10925	0.19155	0.02985
	0.40955	0.1881	0.0798	0.07315	0.19485
	0.1871	0.41225	1.404	0.281	0.0729
	0.0833	1.2617	0.0984	0.1047	0.04605
	0.0751	0.8198	0.1861	0.1077	0.0227
	1.46625	0.02445	0.07985	0.0605	0.0365
	1.42895	0.09125	0.08475	0.1231	0.15595
	0.7647	0.3032	0.1314	0.01495	0.0636
	4.93165	0.02855	0.1754	0.0107	0.0351
	0.69825	0.15245	1.01955	0.27105	0.1143
	1.8133	0.18755	1.5508	0.04155	0.06615
	0.31865	0.4645	0.45015	0.3926	0.1538
	0.2482	0.04885	0.21015	0.01185	0.1477
	0.4536	0.0555	0.45825	0.22105	0.1116
	1.9764	0.51255	0.0566	0.17025	0.06165
	1.10245	0.0353	1.0573	0.0701	0.065
	1.4133	0.0561	0.32425	0.09945	0.06195
	0.54235	0.0425	0.06735	0.10545	0.05525
	0.2127	0.0527	0.4317	0.0378	0.16095
	0.58025	0.05285	0.98075	0.2352	0.1925
	0.0321	0.0975	0.08435	0.218	0.10465
	0.12845	0.09255	0.16	0.0988	0.03
	0.0577	0.0537	0.05915	0.2484	0.132
	0.05285	0.0592	0.13585	0.1515	0.2713
	0.02405	0.02085	0.0584	0.0643	0.06175
	0.3582	0.12445	0.0205	0.3762	0.13695
	0.1307	0.06735	0.10735	0.1762	0.36735
	0.05105	0.03265	0.03365	0.05615	0.18115
	0.0712	0.057	0.1374	0.17435	0.1549
	0.22195	0.04225	0.02995	0.02685	0.0381
	0.20385	0.02175	0.0739	0.15445	0.01245
	0.32945	0.0288	0.02	0.2692	0.2296
	0.5041	0.04375	0.0559	0.04205	0.00135
	1.16985	0.0237	0.079	0.54195	0.0184
	0.4555	0.12045	0.27895	0.05955	0.0024
	0.19325	0.3545	0.1959	0.2015	0.01015
	0.68935	0.0427	0.37765	0.1868	0.01005
	0.80965	0.87865	0.04865	0.08405	0.0022
	0.1949	0.5055	0.3501	0.33135	0.00515
	1.15515	0.06695	0.96905	0.09675	0.11885
		0.7855	0.05635	0.0686	0.0273
		0.67615	2.62715	0.2116	0.10005
		0.04245	0.76655	0.26215	0.0054
		0.07705	1.497	0.80725	0.01195
		0.12635	0.14635	0.2497	0.03065
		0.1436	0.7007	0.4888	0.0017
		0.1393	0.3809	0.2513	0.08415
		0.06775		0.0208	0.005
		0.06955		0.2104	0.01695
		0.06545		3.54755	0.169
		0.04395		0.3809	0.08515
		0.1516		1.0327	0.1501
		0.65695		0.11905	0.09045
		0.03715		0.33625	0.1656
		0.0513		0.3401	0.0369
		0.4885		0.373	0.30765
		0.2206		0.40855	0.2403
		0.24915		0.33475	0.0055
		0.1857		0.3429	0.00275
		0.2886		0.51905	0.06055
		0.26805		0.08225	0.0018
		0.8257		0.2184	0.2029
		1.0638		0.27315	0.0168
		0.1366		3.0464	0.0427
		0.1697		0.3812	0.00385
		0.03665		1.03445	0.01465
		0.1353		0.12255	0.00375
		0.058		0.3359	0.2245
		0.05145		0.7124	0.1
		0.02055		0.4063	0.00865
		0.06665		0.329	0.0037
		0.09565		0.2386	0.00275
		0.5324		1.2003	0.04825
		0.0588		0.04675	0.0103
		0.04245		2.11665	0.00325
		0.12855		2.27085	0.0035
		0.11005		1.91395	0.0084
		0.0779		0.4774	0.00405
		0.32475		0.02285	0.00475
		0.20885		0.29855	0.1832
		0.178		0.63915	0.1258
		0.0431		0.3486	0.02795
		0.29425		0.46205	0.05915
		0.0547		0.09895	0.0109
		0.06685		0.06935	0.0536
		0.03		0.22075	0.004
		0.0372		0.027	0.05835
		0.05625		0.4077	0.01825
		0.05055		0.26685	0.02235
		0.0596		0.25815	0.069
		0.12295		0.07355	0.09295
		0.18885		0.1422	0.2225
		0.02685		0.1702	0.00535
		0.2308		0.06785	0.08445
		0.1119		0.1857	0.20885
		0.0252		0.117	0.03175
		0.0836		0.2584	0.0092
		0.08265		0.36545	0.0336
		0.12865		0.28995	0.0536
		0.4758		0.1624	0.00215
		0.0266		0.55495	0.01875
		0.2033		0.02345	0.22235
		0.1918		1.33975	0.1954
		0.1029		0.2253	0.18255
		0.0391		0.0255	0.26855
		0.22475		0.1664	5e-05
		0.0413		0.0481	0.0026
		0.06095		0.25135	0.05825
		0.03475		0.13475	0.13445
		0.1018		0.2903	0.64035
		0.041		0.3039	0.18625
		0.1205		0.0329	0.044
		0.0741		1.4706	0.0247
		0.10805		0.0652	0.27555
		0.19085		0.47	0.09765
		0.2977		0.28415	0.3529
		0.2005		0.72455	0.00755
		0.289		0.13115	0.13285
		0.059		0.0237	0.8165
		0.0843		0.0289	0.31975
		0.1358		0.0868	0.23595
		0.07935		0.0195	0.0772
		0.07565		0.01145	0.1616
		0.15375		0.164	0.12875
		0.2742		0.03915	0.5967
		0.3052		0.2579	0.04635
		0.8686		0.03865	0.3683
		0.28305		0.1464	0.5155
		1.5683		0.0143	0.20575
		0.41195		0.08645	0.2711
		0.24745		0.2536	1.11085
		0.84585		0.29695	0.1492
		0.04125		0.0719	0.8808
		0.71465		0.0423	0.17665
		0.2487		0.0743	0.068
		0.17815		0.1131	0.1163
		0.03815		0.04705	0.1445
		0.38185		0.10255	0.18365
		0.6966		0.11495	0.6487
		0.4863		0.0609	0.38065
		2.2879		0.0756	0.03545
		0.2718		0.0844	0.0717
		0.0507		0.01075	0.0451
		0.44115		0.0931	0.03645
		0.17795		0.03795	0.1904
		0.73125		0.05165	0.0115
		0.38165		0.04505	0.0714
		0.7958		0.2141	0.07755
		0.38205		0.25645	0.0811
		0.04355		0.0124	0.14955
		0.07755		0.16715	0.04135
		0.02895		0.11225	0.0968
		1.81425		0.01275	0.02835
		0.8253		0.014	0.10435
		0.0287		0.12615	0.03505
		0.1547		0.0589	0.0407
		0.2214		0.21515	0.0689
		0.11525		0.0576	0.0907
		0.02285		0.03475	0.0603
		1.22845		0.0397	0.0473
		0.0803		0.01975	0.09235
		0.65235		0.03165	0.0596
		0.56575		0.01565	0.02505
		0.1565		0.0453	0.03645
		0.46765		0.01915	0.0948
		0.4178		0.0219	0.07735
		0.26185		0.04345	0.04465
		1.18555		0.05925	0.0311
		0.38955		0.4299	0.12355
		0.28325		0.02795	0.04345
		0.8199		0.0446	0.02795
		0.293		0.07785	0.0115
		0.0952		0.0419	0.09785
		0.09035		0.1091	0.18925
		0.05615		0.0225	0.16245
		0.06775		0.03005	0.03475
		0.0433		0.017	0.05675
		0.02465		0.0979	0.12735
		0.0671		0.0794	0.9562
		0.0363		0.0901	0.14745
		0.106		0.0276	0.3577
		0.04525		0.15075	0.19295
		0.02565		0.0318	0.1009
		0.05995		0.01575	0.58265
		0.0397		0.01815	0.05545
		0.0294		0.0668	0.17695
		0.04975		0.1959	0.34635
		0.03595		0.0231	0.36055
		0.1054		0.1236	0.0858
		1.19695		0.06905	0.2928
		0.05695		0.13895	1.668
		0.0935		0.03235	0.305
		0.31235		0.09	0.42255
		0.11395		0.0831	1.467
		0.04415		0.5827	0.37595
		0.06725		0.0613	0.2575
		0.0727		0.267	0.1761
		0.04285		0.20435	0.08445
		0.12185		0.1794	0.0552
		0.46595		0.7244	0.11735
		0.02705		0.13115	0.3289
		0.6232		0.02385	0.0529
		0.2045		0.0209	0.0204
		0.0927		0.08605	0.47555
		0.25945		0.0193	0.6646
		0.0642		0.1629	0.19945
		0.44275		0.0387	0.5046
		0.0482		0.02455	0.1126
		0.04675		0.1184	0.4433
		0.05345		0.01435	0.3225
		0.06845		0.0863	0.0688
		0.0449		0.2532	0.05385
		0.11495		0.02115	0.1454
		0.0406		0.04575	0.22725
		0.40565		0.07055	0.1586
		0.17345		0.04135	0.38655
		0.6933		0.07355	0.1498
		0.2195		0.1103	0.5922
		0.05885		0.04455	0.09955
		0.06315		0.10165	0.41985
		0.11565		0.1156	0.29405
		0.0366		0.035	0.4811
		0.0301		0.0218	0.07315
		0.0575		0.07445	0.03505
		0.1194		0.08255	1.2769
		0.13515		0.0924	0.15725
		0.0442		0.0379	0.025
		0.0131		0.0212	0.16335
		0.0314		0.0293	0.06335
		0.0191		0.0456	0.1738
		0.0737		0.16615	0.57485
		0.13015		0.01365	0.59605
		0.13195		0.1254	0.2649
		0.0132		0.0575	0.93835
		0.2708		0.2142	0.43445
		0.01255		0.0477	0.08935
		0.2369		0.03445	0.29825
		0.3946		0.03935	0.3083
		0.06625		0.01435	0.29225
		0.06065		0.0295	0.43395
		0.01095		0.01155	0.78895
		0.04315		0.04385	0.094
		0.0342		0.01875	1.40765
		0.0144		0.0213
		0.0224		0.04225
		0.0516		0.05845
		0.07675		0.01115
		0.1685		0.0446
		0.1247		0.0773
		0.02535		0.04055
		0.74075		0.1089
		1.6094		0.022
		0.1636		0.0648
		0.0858		0.03055
		0.0844		0.04175
		0.0272		0.02205
		0.1445		0.0297
		0.1126		0.1323
		0.13875		0.0256
		0.02795		1.2285
		0.0488		0.22995
		0.09655		0.56255
		0.07345		0.7876
		0.044		0.31575
		0.05725		0.17825
		0.0637		0.542
		0.04805		0.07765
		0.06385		0.0591
		0.0685		0.90325
		0.2599		0.76405
		0.0939		0.79575
		0.0444		0.1596
		0.34415		0.0461
		0.09375		1.1544
		0.35355		0.0907
		0.15595		0.74945
		0.3317		1.37925
		0.0388		0.04575
		0.05265		3.39545
		0.31505		0.67455
		1.16035		0.24455
		0.66455		0.9551
		0.3286		0.1288
		1.2568		2.37165
		0.0208		0.5511
		0.09795		0.22125
		0.38455		0.36725
		0.10065		2.3925
		0.15795		0.4125
		0.2191		3.2708
		0.9349		0.5678
		0.15815		1.59325
		0.67795		0.054
		0.3389		0.04145
		0.06105		0.2337
		0.6807		0.34795
		1.1461		0.15045
		0.15935		0.2029
		0.09325		0.3044
		0.0937		0.92605
		0.12035		0.31135
		0.7155		0.09665
		0.07455		0.17825
		0.70085		1.0981
		0.79365		0.41465
		0.0927
		0.1471
		0.07355
		2.96555
		0.5036
		0.17355
		0.5298
		0.44085
		0.454
		0.2357
		0.21775
		0.11075
		0.14725
		0.1128
		0.0564
		0.2959
		0.03865
		0.49755
		0.45965
		0.36905
		0.3051
		0.3023
		0.505
		0.5855
		0.0404
		0.05345
		0.34795
		0.14655
		0.036
		0.939
		0.58765
		0.0687
		0.04995
		0.0195
		0.38325
		1.29235

## Sheet: G12 bound backward
Dark-field	Bound dwell time		E236A-WT	G12	Fig.6-suppl 4C
ATP conc	uM
10	20	50	1000
0.06865	0.0899	0.0617	0.0183
0.00275	0.04405	0.0081	0.0072
0.0025	0.0944	0.03085	0.00865
0.043	0.063	0.00745	0.0278
0.02385	0.0625	0.0507	0.0064
0.0323	0.00375	0.0086	0.02945
0.08905	0.22445	0.02755	0.0097
0.01705	0.2018	0.00765	0.0066
0.05285	0.2856	0.01485	0.0045
0.011	0.11695	0.0292	0.1407
0.04775	0.0831	0.00365	0.01745
0.0415	0.05725	0.0094	0.0028
0.0885	0.0848	0.04935	0.0019
0.0277	0.0159	0.0044	0.02985
0.02425	0.0126	0.01165	0.03085
0.02495	0.0215	0.0022	0.0209
0.04705	0.0951	0.012	0.04225
0.0189	0.01365	0.0204	0.0041
0.03385	0.3217		0.0111
0.0097	0.031		0.0116
0.0102	0.056		0.0071
0.00795	0.1308		0.01605
0.008	0.02355		0.0094
0.01425	0.0742		0.00655
0.00595	0.04015		0.0345
0.01005	0.05805		0.0184
0.005	0.01355		0.01015
0.00505	0.0033		0.01025
0.00515	0.01985		0.0054
0.03215	0.07795		0.00685
0.0365	0.09475		0.0022
0.0109	0.0854		0.0019
0.00665			0.0194
0.0045			0.0203
0.00875			0.01755
0.02455			0.0153
0.0638			0.00895
0.03205			0.0278
0.00565			0.01405
0.0073			0.04525
0.0447			0.0109
0.00565			0.0019
0.02895			0.0026
0.03475			0.01195
0.06615			0.0259
0.0378			0.00875
0.0179			0.0198
0.038			0.01155
0.00465			0.0252
0.076			0.0124
0.0706
0.01505
0.00525
0.0061
0.0153
0.065
0.013
0.06875
0.26135
0.01245
0.0213
0.0312
0.0984
0.0711
0.03975
0.0134
