# Supplementary material for: Kinetic regulation of kinesin’s two motor domains coordinates its stepping along microtubules
Source: eLife. 2025 Apr 17;14:RP106228. doi: 10.7554/eLife.106228 (PMC12005725; doi:10.7554/eLife.106228)
Supplement: Figure 5—source data 1. [file elife-106228-fig5-data1.xlsx]

## Sheet: G0 1mM
Dark-field trace				Fig.5B & Fig.5-suppl 1
E236A-WT/55		1mM ATP
20000 fps
time	X-axis	Y-axis
0	-24.4197	-319.126
5e-05	-22.4979	-319.245
0.0001	-23.2348	-318.199
0.00015	-25.3024	-318.505
0.0002	-19.1329	-321.758
0.00025	-21.6139	-324.271
0.0003	-26.917	-318.091
0.00035	-26.168	-315.113
0.0004	-24.3365	-320.714
0.00045	-25.0867	-321.128
0.0005	-24.3511	-322.526
0.00055	-24.6417	-322.185
0.0006	-24.7749	-319.076
0.00065	-22.7588	-319.212
0.0007	-23.5474	-319.822
0.00075	-23.2822	-317.868
0.0008	-25.6446	-319.695
0.00085	-23.4896	-320.897
0.0009	-25.4348	-322.876
0.00095	-25.5134	-320.399
0.001	-22.0664	-322.484
0.00105	-25.0084	-321.436
0.0011	-21.6692	-322.338
0.00115	-22.079	-320.764
0.0012	-21.6505	-322.652
0.00125	-27.9783	-317.652
0.0013	-24.196	-321.032
0.00135	-23.2278	-320.219
0.0014	-27.8499	-320.289
0.00145	-22.261	-321.835
0.0015	-21.4479	-321.618
0.00155	-23.2538	-319.846
0.0016	-26.5873	-318.638
0.00165	-21.5878	-320.348
0.0017	-18.7631	-324.604
0.00175	-27.9213	-317.422
0.0018	-22.2864	-322.817
0.00185	-25.3658	-317.97
0.0019	-29.4947	-316.323
0.00195	-25.3153	-319.51
0.002	-18.4423	-318.98
0.00205	-18.9951	-322.64
0.0021	-21.4764	-321.238
0.00215	-24.0333	-322.98
0.0022	-18.241	-325.222
0.00225	-16.5473	-324.846
0.0023	-22.7988	-318.239
0.00235	-20.9625	-321.343
0.0024	-24.5624	-319.961
0.00245	-20.2988	-320.811
0.0025	-23.5335	-319.965
0.00255	-24.7186	-322.655
0.0026	-21.6746	-321.653
0.00265	-22.9304	-326.52
0.0027	-22.7973	-323.697
0.00275	-24.8572	-321.355
0.0028	-28.3678	-322.823
0.00285	-29.0686	-314.054
0.0029	-27.1725	-319.489
0.00295	-23.0146	-325.24
0.003	-22.289	-321.497
0.00305	-23.8981	-324.028
0.0031	-26.0145	-321.991
0.00315	-28.8335	-318.452
0.0032	-22.9071	-318.149
0.00325	-20.3335	-319.493
0.0033	-24.6768	-316.832
0.00335	-24.323	-318.691
0.0034	-21.3563	-318.779
0.00345	-18.5922	-319.735
0.0035	-26.5852	-317.605
0.00355	-22.5296	-316.663
0.0036	-23.0871	-319.38
0.00365	-23.6687	-319.683
0.0037	-23.3957	-315.535
0.00375	-20.5958	-321.627
0.0038	-24.0188	-315.026
0.00385	-20.2147	-321.207
0.0039	-20.7206	-317.808
0.00395	-26.3778	-314.803
0.004	-25.6168	-318.373
0.00405	-18.0575	-322.729
0.0041	-21.5154	-319.798
0.00415	-24.3517	-320.728
0.0042	-18.0889	-323.953
0.00425	-24.8105	-322.606
0.0043	-24.5548	-318.968
0.00435	-23.8681	-319.96
0.0044	-25.6172	-321.046
0.00445	-24.7169	-318.334
0.0045	-22.9915	-320.443
0.00455	-21.3654	-324.249
0.0046	-23.4556	-318.696
0.00465	-24.0586	-316.787
0.0047	-22.8824	-316.894
0.00475	-25.0188	-321.342
0.0048	-23.8991	-323.528
0.00485	-23.6871	-322.795
0.0049	-24.219	-322.994
0.00495	-22.9032	-319.791
0.005	-23.3016	-324.423
0.00505	-24.3227	-320.601
0.0051	-25.096	-324.192
0.00515	-23.8239	-326.691
0.0052	-26.6816	-322.909
0.00525	-24.4854	-325.668
0.0053	-18.3867	-324.258
0.00535	-24.443	-321.035
0.0054	-24.2618	-320.922
0.00545	-22.0621	-321.524
0.0055	-25.0525	-319.824
0.00555	-22.6387	-319.052
0.0056	-22.2101	-321.301
0.00565	-27.271	-319.469
0.0057	-20.5985	-325.599
0.00575	-21.2919	-319.665
0.0058	-21.8712	-321.649
0.00585	-24.7427	-316.515
0.0059	-20.5068	-321.845
0.00595	-16.7592	-318.75
0.006	-18.0714	-319.991
0.00605	-22.8347	-320.128
0.0061	-22.7014	-322.037
0.00615	-23.8145	-328.976
0.0062	-16.9663	-326.984
0.00625	-23.8319	-321.591
0.0063	-23.1754	-317.746
0.00635	-25.1813	-315.076
0.0064	-23.4652	-322.516
0.00645	-22.5051	-321.207
0.0065	-21.3956	-320.143
0.00655	-20.4629	-323.487
0.0066	-23.4297	-317.651
0.00665	-21.4324	-318.95
0.0067	-25.3521	-320.24
0.00675	-26.9218	-322.125
0.0068	-20.5056	-325.415
0.00685	-23.3713	-322.625
0.0069	-24.7027	-319.8
0.00695	-25.1019	-322.909
0.007	-20.0342	-325.963
0.00705	-24.3867	-321.408
0.0071	-25.4549	-316.597
0.00715	-23.8232	-321.728
0.0072	-18.0812	-326.33
0.00725	-22.2641	-325.383
0.0073	-22.3207	-324.643
0.00735	-21.5845	-326.431
0.0074	-22.2613	-324.932
0.00745	-25.5526	-322.366
0.0075	-21.4701	-323.415
0.00755	-17.1056	-326.721
0.0076	-22.8401	-319.45
0.00765	-21.4705	-322.74
0.0077	-23.7765	-323.641
0.00775	-26.0019	-318.102
0.0078	-23.6627	-320.049
0.00785	-23.236	-322.565
0.0079	-22.8044	-320.65
0.00795	-26.8986	-321.542
0.008	-27.4262	-318.128
0.00805	-23.6713	-322.283
0.0081	-25.3381	-319.877
0.00815	-24.1698	-320.04
0.0082	-26.6149	-316.037
0.00825	-28.2443	-321.227
0.0083	-21.4441	-323.702
0.00835	-15.5795	-327.3
0.0084	-25.0751	-318.32
0.00845	-18.2085	-323.651
0.0085	-19.8073	-321.313
0.00855	-19.9403	-323.353
0.0086	-26.085	-320.721
0.00865	-25.8456	-318.427
0.0087	-23.4038	-322.765
0.00875	-23.46	-324.8
0.0088	-22.3822	-323.004
0.00885	-20.315	-318.966
0.0089	-24.1212	-314.67
0.00895	-18.9711	-328.361
0.009	-19.2505	-324.963
0.00905	-26.181	-319.219
0.0091	-25.1617	-321.06
0.00915	-23.8021	-320.36
0.0092	-24.48	-321.224
0.00925	-26.3966	-314.292
0.0093	-24.8617	-322.658
0.00935	-24.8669	-318.161
0.0094	-27.1559	-316.664
0.00945	-27.2577	-319.996
0.0095	-22.7101	-324.317
0.00955	-24.6434	-322.015
0.0096	-27.8858	-319.731
0.00965	-26.314	-320.536
0.0097	-22.1386	-321.534
0.00975	-22.1555	-322.163
0.0098	-27.3511	-315.813
0.00985	-23.5914	-322.49
0.0099	-26.3247	-320.256
0.00995	-20.9726	-326.139
0.01	-26.2043	-320.742
0.01005	-25.8951	-319.915
0.0101	-24.921	-324.915
0.01015	-21.8622	-321.649
0.0102	-22.0441	-321.863
0.01025	-28.2117	-316.361
0.0103	-26.3947	-318.863
0.01035	-21.5916	-324.824
0.0104	-23.262	-318.637
0.01045	-22.5797	-323.441
0.0105	-26.7976	-317.707
0.01055	-27.4842	-320.291
0.0106	-22.5883	-322.213
0.01065	-26.397	-321.041
0.0107	-22.946	-318.743
0.01075	-22.1103	-322.929
0.0108	-23.5238	-322.306
0.01085	-24.2055	-322.805
0.0109	-25.8288	-321.339
0.01095	-22.984	-317.843
0.011	-22.629	-321.713
0.01105	-25.3445	-321.787
0.0111	-18.146	-323.109
0.01115	-19.0435	-321.239
0.0112	-17.6613	-325.329
0.01125	-24.371	-320.731
0.0113	-22.9588	-321.914
0.01135	-22.7578	-323.723
0.0114	-24.189	-321.135
0.01145	-24.6415	-322.762
0.0115	-16.7047	-326.799
0.01155	-20.4464	-323.448
0.0116	-24.4908	-321.24
0.01165	-21.0125	-322.258
0.0117	-25.6181	-322.268
0.01175	-28.0787	-319.167
0.0118	-21.0659	-322.593
0.01185	-21.1325	-322.694
0.0119	-24.3007	-325.771
0.01195	-20.7811	-320.332
0.012	-25.561	-318.811
0.01205	-19.4272	-326.861
0.0121	-20.8189	-322.954
0.01215	-23.0391	-320.001
0.0122	-18.9424	-323.294
0.01225	-25.2078	-316.546
0.0123	-19.819	-325.492
0.01235	-17.819	-323.419
0.0124	-20.5212	-322.483
0.01245	-26.2485	-321.232
0.0125	-21.9417	-321.134
0.01255	-23.7375	-320.176
0.0126	-25.3324	-318.673
0.01265	-19.6956	-321.212
0.0127	-20.2672	-320.342
0.01275	-24.2506	-320.611
0.0128	-24.5786	-320.264
0.01285	-24.1385	-321.167
0.0129	-24.977	-317.648
0.01295	-22.2191	-320.082
0.013	-15.1409	-323.665
0.01305	-20.6409	-321.018
0.0131	-22.6928	-320.007
0.01315	-17.7466	-324.246
0.0132	-16.4304	-327.464
0.01325	-22.576	-320.605
0.0133	-19.5221	-322.392
0.01335	-25.3284	-326.938
0.0134	-21.7665	-323.648
0.01345	-20.7524	-323.526
0.0135	-18.8069	-325.99
0.01355	-20.8576	-321.849
0.0136	-20.6688	-323.448
0.01365	-21.5543	-327.225
0.0137	-24.2836	-324.727
0.01375	-24.3387	-320.478
0.0138	-23.8222	-319.581
0.01385	-23.7704	-322.879
0.0139	-20.82	-322.822
0.01395	-18.9075	-327.877
0.014	-17.2097	-329.253
0.01405	-19.647	-327.139
0.0141	-19.2959	-327.733
0.01415	-24.2551	-318.263
0.0142	-21.6012	-322.897
0.01425	-22.483	-325.389
0.0143	-26.3149	-321.585
0.01435	-27.3635	-323.415
0.0144	-17.4909	-324.951
0.01445	-19.526	-323.303
0.0145	-21.5466	-320.48
0.01455	-18.638	-323.068
0.0146	-18.8876	-324.991
0.01465	-19.4754	-326.458
0.0147	-24.0434	-321.927
0.01475	-25.4975	-321.544
0.0148	-24.9289	-322.125
0.01485	-23.0887	-328.018
0.0149	-28.0567	-324.502
0.01495	-25.783	-320.366
0.015	-21.2341	-325.244
0.01505	-25.8714	-324.495
0.0151	-22.3362	-320.421
0.01515	-23.2628	-324.625
0.0152	-22.157	-325.633
0.01525	-24.9483	-323.506
0.0153	-21.5359	-328.142
0.01535	-23.2734	-324.608
0.0154	-19.0786	-326.983
0.01545	-21.5603	-324.056
0.0155	-19.8753	-321.537
0.01555	-21.417	-323.672
0.0156	-26.1169	-318.584
0.01565	-25.7806	-323.736
0.0157	-26.4524	-322.82
0.01575	-25.4402	-326.794
0.0158	-28.8121	-320.313
0.01585	-26.7599	-326.649
0.0159	-25.5706	-324.822
0.01595	-23.9929	-325.639
0.016	-24.0619	-324.833
0.01605	-26.1767	-322.23
0.0161	-25.7337	-323.018
0.01615	-25.1219	-321.217
0.0162	-29.4932	-319.051
0.01625	-25.6374	-320.78
0.0163	-20.057	-325.548
0.01635	-20.703	-325.097
0.0164	-30.411	-319.75
0.01645	-26.3532	-320.928
0.0165	-18.3402	-327.049
0.01655	-24.1796	-324.752
0.0166	-21.7879	-325.347
0.01665	-25.6838	-323.3
0.0167	-27.5373	-322.684
0.01675	-22.9977	-324.41
0.0168	-25.3034	-325.952
0.01685	-27.0216	-322.55
0.0169	-23.7883	-322.909
0.01695	-24.9372	-321.03
0.017	-17.6032	-326.972
0.01705	-22.3993	-323.827
0.0171	-21.071	-325.889
0.01715	-23.8467	-320.667
0.0172	-26.5259	-321.499
0.01725	-22.3361	-321.301
0.0173	-20.8541	-322.815
0.01735	-18.7942	-323.16
0.0174	-21.2262	-321.001
0.01745	-23.4382	-320.793
0.0175	-21.6671	-323.216
0.01755	-26.1098	-321.127
0.0176	-17.0619	-324.405
0.01765	-22.9577	-320.311
0.0177	-24.8741	-319.515
0.01775	-21.2681	-322.198
0.0178	-20.8394	-322.089
0.01785	-23.5917	-319.924
0.0179	-22.7097	-318.972
0.01795	-26.1445	-315.653
0.018	-21.7647	-321.827
0.01805	-21.0059	-320.366
0.0181	-24.3568	-319.055
0.01815	-24.0186	-318.402
0.0182	-26.3698	-321.007
0.01825	-20.831	-325.451
0.0183	-22.7647	-323.728
0.01835	-25.5482	-322.655
0.0184	-24.3195	-323.162
0.01845	-28.3187	-321.306
0.0185	-26.9303	-324.355
0.01855	-25.917	-320.548
0.0186	-24.7803	-324.362
0.01865	-24.8188	-318.225
0.0187	-25.4184	-318.55
0.01875	-24.5877	-324.578
0.0188	-27.9064	-321.165
0.01885	-25.7345	-321.611
0.0189	-19.8032	-327.01
0.01895	-19.6514	-324.799
0.019	-19.709	-322.222
0.01905	-14.845	-327.143
0.0191	-22.3287	-323.425
0.01915	-21.4922	-321.987
0.0192	-23.6025	-320.444
0.01925	-18.2479	-324.821
0.0193	-18.1635	-323.162
0.01935	-24.5365	-318.88
0.0194	-23.667	-317.992
0.01945	-24.3488	-320.109
0.0195	-23.9764	-318.721
0.01955	-23.3516	-320.674
0.0196	-24.442	-320.309
0.01965	-16.866	-324.322
0.0197	-18.0269	-323.653
0.01975	-23.4018	-323.907
0.0198	-25.5493	-320.192
0.01985	-22.5818	-320.135
0.0199	-24.4972	-319.365
0.01995	-29.2445	-319.131
0.02	-26.9942	-322.28
0.02005	-24.694	-318.677
0.0201	-17.7889	-321.516
0.02015	-21.7082	-320.498
0.0202	-20.9369	-321.902
0.02025	-21.8161	-319.698
0.0203	-26.7927	-313.955
0.02035	-24.3662	-315.189
0.0204	-17.3929	-324.569
0.02045	-17.8523	-327.054
0.0205	-19.9196	-326.657
0.02055	-20.3518	-325.475
0.0206	-25.3551	-321.035
0.02065	-29.9057	-316.362
0.0207	-26.7961	-318.201
0.02075	-24.7052	-322.539
0.0208	-26.4667	-320.436
0.02085	-25.3341	-320.954
0.0209	-26.7474	-323.019
0.02095	-26.3104	-321.397
0.021	-23.5352	-322.928
0.02105	-24.7992	-318.933
0.0211	-22.1254	-321.151
0.02115	-23.1711	-321.261
0.0212	-17.7349	-321.512
0.02125	-18.6296	-325.678
0.0213	-21.7279	-317.872
0.02135	-26.1213	-316.856
0.0214	-23.1136	-321.829
0.02145	-27.0009	-324.025
0.0215	-21.6413	-326.03
0.02155	-20.038	-325.713
0.0216	-25.3608	-318.897
0.02165	-20.8722	-326.999
0.0217	-23.0289	-324.253
0.02175	-24.3836	-323.212
0.0218	-24.2247	-324.599
0.02185	-23.982	-320.809
0.0219	-20.3411	-322.201
0.02195	-23.1831	-321.415
0.022	-24.1894	-319.534
0.02205	-23.8011	-321.629
0.0221	-27.7781	-320.136
0.02215	-23.4608	-319.646
0.0222	-25.3246	-321.754
0.02225	-27.2004	-318.966
0.0223	-25.6003	-323.627
0.02235	-24.1133	-321.334
0.0224	-22.4176	-320.614
0.02245	-21.8667	-323.249
0.0225	-19.5996	-321.804
0.02255	-23.2059	-321.873
0.0226	-23.0378	-321.924
0.02265	-20.4094	-324.121
0.0227	-21.0277	-324.608
0.02275	-22.2877	-318.575
0.0228	-25.8195	-322.179
0.02285	-25.8115	-321.425
0.0229	-26.5036	-317.895
0.02295	-26.3155	-314.919
0.023	-24.9083	-322.624
0.02305	-21.3618	-323.885
0.0231	-25.7787	-318.905
0.02315	-25.0435	-321.12
0.0232	-21.967	-321.935
0.02325	-24.8983	-320.44
0.0233	-26.2856	-319.154
0.02335	-24.6511	-322.743
0.0234	-24.9802	-321.253
0.02345	-23.7267	-319.492
0.0235	-25.8474	-322.276
0.02355	-18.563	-320.473
0.0236	-20.7967	-322.024
0.02365	-26.5925	-318.535
0.0237	-25.9248	-318.692
0.02375	-23.391	-324.989
0.0238	-24.0972	-321.899
0.02385	-23.7889	-320.219
0.0239	-19.5523	-322.092
0.02395	-25.6219	-317.72
0.024	-27.1123	-320.685
0.02405	-25.0511	-324.001
0.0241	-25.4258	-319.846
0.02415	-23.2331	-324.755
0.0242	-23.3508	-321.942
0.02425	-25.5945	-318.137
0.0243	-28.28	-320.459
0.02435	-24.7329	-319.707
0.0244	-23.7784	-322.586
0.02445	-22.3311	-325.082
0.0245	-25.6951	-320.903
0.02455	-23.9667	-321.843
0.0246	-25.6397	-317.282
0.02465	-21.7168	-322.276
0.0247	-23.6297	-324.646
0.02475	-24.9373	-325.899
0.0248	-26.2025	-321.609
0.02485	-23.5407	-319.87
0.0249	-23.1354	-325.463
0.02495	-16.7774	-325.227
0.025	-16.8073	-326.415
0.02505	-21.2499	-324.455
0.0251	-25.4561	-321.786
0.02515	-25.4693	-322.482
0.0252	-24.1137	-324.99
0.02525	-23.9778	-324.451
0.0253	-23.0216	-326.93
0.02535	-18.9822	-325.498
0.0254	-16.9268	-327.568
0.02545	-21.1606	-325.159
0.0255	-24.1038	-324.369
0.02555	-23.143	-321.69
0.0256	-27.5619	-319.617
0.02565	-25.2188	-319.943
0.0257	-22.2189	-322.05
0.02575	-25.8185	-323.28
0.0258	-27.8855	-322.196
0.02585	-25.2998	-320.53
0.0259	-21.7623	-326.259
0.02595	-25.0886	-321.573
0.026	-24.919	-321.385
0.02605	-23.6796	-323.098
0.0261	-28.6836	-320.168
0.02615	-26.8391	-319.703
0.0262	-28.9596	-317.587
0.02625	-23.3249	-323.411
0.0263	-25.817	-322.495
0.02635	-28.7787	-321.54
0.0264	-27.8943	-322.902
0.02645	-22.1549	-322.388
0.0265	-23.7515	-324.262
0.02655	-23.7231	-323.43
0.0266	-23.2425	-324.86
0.02665	-24.8162	-325.352
0.0267	-24.5023	-319.949
0.02675	-21.8428	-322.982
0.0268	-18.9677	-324.559
0.02685	-23.135	-322.643
0.0269	-28.3154	-317.109
0.02695	-28.5708	-322.343
0.027	-28.1056	-316.268
0.02705	-24.5093	-321.53
0.0271	-19.4901	-326.58
0.02715	-20.8472	-325.639
0.0272	-14.8543	-329.823
0.02725	-19.1565	-325.456
0.0273	-19.5669	-322.076
0.02735	-25.0003	-321.847
0.0274	-25.8277	-319.013
0.02745	-21.5756	-323.794
0.0275	-20.9474	-321.501
0.02755	-24.6226	-321.261
0.0276	-21.57	-323.395
0.02765	-19.0544	-325.996
0.0277	-27.569	-319.179
0.02775	-24.3904	-318.351
0.0278	-25.2457	-324.282
0.02785	-28.165	-317.799
0.0279	-26.5761	-314.356
0.02795	-29.5482	-317.668
0.028	-28.3396	-317.175
0.02805	-24.3562	-321.022
0.0281	-23.4978	-320.901
0.02815	-25.9874	-321.347
0.0282	-29.901	-321.891
0.02825	-23.1494	-322.108
0.0283	-26.9339	-319.996
0.02835	-22.3124	-320.928
0.0284	-22.8311	-321.131
0.02845	-23.4429	-323.651
0.0285	-28.8104	-314.097
0.02855	-23.0358	-321.33
0.0286	-23.878	-321.562
0.02865	-23.4157	-319.009
0.0287	-23.3792	-322.542
0.02875	-27.1604	-318.808
0.0288	-18.9661	-327.729
0.02885	-28.2562	-320.69
0.0289	-28.0718	-320.443
0.02895	-28.359	-321.815
0.029	-29.202	-317.841
0.02905	-23.4001	-320.029
0.0291	-22.5293	-322.717
0.02915	-21.0684	-321.65
0.0292	-20.776	-324.309
0.02925	-21.9485	-324.767
0.0293	-23.6905	-318.152
0.02935	-24.8275	-319.768
0.0294	-26.3752	-320.786
0.02945	-24.8695	-320.737
0.0295	-22.9495	-326.11
0.02955	-24.8188	-322.94
0.0296	-20.3802	-326.487
0.02965	-28.6569	-320.341
0.0297	-22.966	-322.279
0.02975	-26.6701	-322.164
0.0298	-27.888	-321.506
0.02985	-28.4092	-320.162
0.0299	-22.7306	-322.795
0.02995	-23.1565	-322.924
0.03	-24.5893	-318.572
0.03005	-25.3464	-319.726
0.0301	-24.1958	-318.649
0.03015	-26.0468	-318.798
0.0302	-26.0069	-320.526
0.03025	-21.9732	-329.001
0.0303	-26.3257	-323.71
0.03035	-28.9932	-323.065
0.0304	-28.0043	-321.377
0.03045	-27.4472	-325.872
0.0305	-29.1723	-322.813
0.03055	-25.227	-326.409
0.0306	-22.3591	-320.827
0.03065	-29.5756	-318.431
0.0307	-24.742	-319.106
0.03075	-22.353	-323.175
0.0308	-28.0769	-321.02
0.03085	-25.7585	-319.35
0.0309	-24.0964	-323.446
0.03095	-24.3925	-322.485
0.031	-23.8291	-320.95
0.03105	-23.1008	-322.648
0.0311	-24.3667	-321.175
0.03115	-26.1975	-318.614
0.0312	-22.5717	-319.7
0.03125	-21.0789	-320.337
0.0313	-24.3315	-317.668
0.03135	-25.7756	-316.325
0.0314	-16.9352	-323.042
0.03145	-24.5779	-316.843
0.0315	-21.7849	-321.435
0.03155	-21.4589	-322.574
0.0316	-23.8484	-323.475
0.03165	-15.4922	-325.253
0.0317	-20.8973	-321.209
0.03175	-25.2179	-317.983
0.0318	-16.5073	-323.606
0.03185	-17.9982	-321.387
0.0319	-19.15	-321.544
0.03195	-15.1168	-321.144
0.032	-16.6968	-326.237
0.03205	-16.8623	-319.522
0.0321	-22.7003	-320.126
0.03215	-22.8371	-320.182
0.0322	-24.1991	-321.854
0.03225	-25.2223	-321.93
0.0323	-27.7684	-319.648
0.03235	-25.2696	-324.147
0.0324	-22.3271	-322.469
0.03245	-25.8419	-316.961
0.0325	-27.2122	-322.876
0.03255	-22.9411	-323.239
0.0326	-21.2485	-321.649
0.03265	-20.3673	-322.575
0.0327	-22.0057	-323.414
0.03275	-23.0914	-322.966
0.0328	-22.5412	-320.397
0.03285	-24.4879	-320.38
0.0329	-24.7729	-323.634
0.03295	-20.1937	-323.684
0.033	-21.9065	-324.774
0.03305	-25.1249	-317.786
0.0331	-24.5328	-318.072
0.03315	-23.494	-320.941
0.0332	-21.317	-322.216
0.03325	-20.1678	-323.605
0.0333	-16.4848	-325.675
0.03335	-22.7579	-319.019
0.0334	-21.1589	-321.465
0.03345	-25.9073	-319.69
0.0335	-26.5175	-318.068
0.03355	-22.1159	-316.889
0.0336	-20.1961	-321.758
0.03365	-20.4836	-321.146
0.0337	-24.8325	-317.609
0.03375	-23.0623	-321.519
0.0338	-20.1817	-323.544
0.03385	-18.4988	-326.632
0.0339	-21.8916	-320.413
0.03395	-21.2107	-323.152
0.034	-17.1646	-322.118
0.03405	-19.9017	-323.911
0.0341	-26.8073	-322.145
0.03415	-24.2233	-320.496
0.0342	-20.6448	-323.873
0.03425	-18.8139	-321.813
0.0343	-20.8624	-319.388
0.03435	-23.5875	-322.668
0.0344	-23.6654	-316.827
0.03445	-23.9793	-321.187
0.0345	-20.6344	-324.412
0.03455	-24.6254	-320.073
0.0346	-25.6531	-319.028
0.03465	-25.2392	-320.741
0.0347	-17.6793	-324.363
0.03475	-22.392	-314.706
0.0348	-19.506	-317.129
0.03485	-21.4653	-319.124
0.0349	-20.3504	-320.466
0.03495	-22.0627	-318.411
0.035	-19.911	-321.482
0.03505	-23.0575	-318.293
0.0351	-24.2506	-318.306
0.03515	-25.3514	-321.664
0.0352	-25.2352	-321.75
0.03525	-24.5585	-320.031
0.0353	-21.6632	-320.947
0.03535	-21.8897	-319.007
0.0354	-21.9465	-320.884
0.03545	-21.4042	-322.185
0.0355	-22.5746	-321.53
0.03555	-26.8758	-318.186
0.0356	-25.7447	-320.33
0.03565	-22.9439	-321.99
0.0357	-24.0578	-319.177
0.03575	-24.6852	-318.05
0.0358	-18.6956	-319.373
0.03585	-22.9076	-318.762
0.0359	-16.6165	-324.923
0.03595	-25.2113	-320.856
0.036	-18.7015	-325.221
0.03605	-19.8621	-323.648
0.0361	-26.9537	-318.037
0.03615	-23.1646	-318.222
0.0362	-22.617	-324.139
0.03625	-23.5396	-322.648
0.0363	-21.203	-323.907
0.03635	-23.0569	-321.065
0.0364	-25.7053	-316.756
0.03645	-23.2749	-319.509
0.0365	-22.9678	-320.445
0.03655	-23.9853	-323.665
0.0366	-25.4911	-317.595
0.03665	-23.6571	-321.344
0.0367	-28.0241	-317.975
0.03675	-22.3266	-323.636
0.0368	-19.4037	-322.039
0.03685	-23.1505	-323.289
0.0369	-25.1724	-325.281
0.03695	-23.7059	-321.532
0.037	-20.7954	-324.545
0.03705	-23.6052	-323.474
0.0371	-21.1364	-325.449
0.03715	-21.6972	-323.951
0.0372	-22.6773	-323.751
0.03725	-27.2443	-322.809
0.0373	-25.1279	-322.883
0.03735	-22.7321	-322.523
0.0374	-22.1845	-322.304
0.03745	-26.038	-324.395
0.0375	-27.8619	-321.239
0.03755	-27.1633	-323.158
0.0376	-27.1189	-315.191
0.03765	-20.7822	-323.277
0.0377	-24.6951	-315.775
0.03775	-22.028	-319.398
0.0378	-25.9185	-319.716
0.03785	-23.6027	-320.584
0.0379	-25.0674	-316.65
0.03795	-28.6186	-314.464
0.038	-27.2231	-319.408
0.03805	-27.6516	-314.974
0.0381	-15.8175	-324.981
0.03815	-20.8499	-324.45
0.0382	-23.1402	-319.372
0.03825	-18.9351	-322.344
0.0383	-21.132	-326.043
0.03835	-22.0834	-323.882
0.0384	-21.7092	-321.701
0.03845	-25.1207	-322.798
0.0385	-23.109	-322.746
0.03855	-20.9909	-324.287
0.0386	-22.3774	-320.78
0.03865	-19.9032	-326.068
0.0387	-25.3462	-322.948
0.03875	-25.3756	-321.037
0.0388	-22.1343	-321.144
0.03885	-20.3888	-320.68
0.0389	-23.8275	-317.812
0.03895	-18.6876	-322.316
0.039	-17.0945	-323.656
0.03905	-24.2485	-319.084
0.0391	-24.8987	-322.555
0.03915	-19.0295	-323.516
0.0392	-23.1751	-320.833
0.03925	-22.7275	-319.29
0.0393	-26.7654	-318.273
0.03935	-24.9288	-316.686
0.0394	-21.859	-321.341
0.03945	-20.3025	-322.238
0.0395	-21.8292	-319.632
0.03955	-24.5634	-315.438
0.0396	-26.0193	-318.351
0.03965	-22.7565	-318.944
0.0397	-24.8844	-319.837
0.03975	-24.9256	-316.06
0.0398	-27.8692	-315.546
0.03985	-22.792	-320.087
0.0399	-25.5128	-320.073
0.03995	-26.6869	-316.128
0.04	-23.1987	-317.724
0.04005	-25.9352	-312.371
0.0401	-24.7078	-314.71
0.04015	-24.2059	-317.396
0.0402	-19.4929	-321.148
0.04025	-19.3195	-320.524
0.0403	-26.361	-310.463
0.04035	-22.5607	-320.534
0.0404	-28.9377	-315.899
0.04045	-21.746	-322.076
0.0405	-28.3706	-315.707
0.04055	-26.998	-319.069
0.0406	-24.6647	-318.494
0.04065	-22.6449	-324.525
0.0407	-24.965	-317.516
0.04075	-20.7903	-323.303
0.0408	-24.9905	-321.182
0.04085	-25.3904	-317.232
0.0409	-23.8441	-320.803
0.04095	-17.2217	-324.473
0.041	-17.5947	-325.436
0.04105	-21.0059	-322.338
0.0411	-20.8317	-322.241
0.04115	-20.9331	-322.123
0.0412	-23.043	-320.301
0.04125	-22.5491	-318.659
0.0413	-21.09	-322.795
0.04135	-18.275	-325.068
0.0414	-22.782	-321.125
0.04145	-18.7679	-324.409
0.0415	-22.5548	-321.137
0.04155	-20.9029	-322.68
0.0416	-22.8296	-322.111
0.04165	-22.3478	-322.392
0.0417	-23.6519	-318.134
0.04175	-24.1702	-315.836
0.0418	-27.5941	-315.91
0.04185	-22.9983	-318.332
0.0419	-20.094	-321.985
0.04195	-22.2064	-320.635
0.042	-20.2195	-318.934
0.04205	-22.4095	-321.942
0.0421	-22.3004	-317.304
0.04215	-24.0636	-320.018
0.0422	-21.5669	-324.186
0.04225	-27.462	-318.165
0.0423	-26.4191	-320.984
0.04235	-28.1304	-319.562
0.0424	-27.585	-317.837
0.04245	-27.4905	-318.223
0.0425	-26.076	-317.904
0.04255	-28.8471	-314.06
0.0426	-25.5845	-320.32
0.04265	-25.4477	-318.749
0.0427	-20.8027	-318.56
0.04275	-26.3351	-315.133
0.0428	-26.3556	-319.065
0.04285	-24.0389	-317.42
0.0429	-20.0476	-319.62
0.04295	-22.1351	-320.319
0.043	-23.9327	-318.118
0.04305	-23.3728	-319.614
0.0431	-22.9381	-321.857
0.04315	-21.0024	-321.595
0.0432	-19.7517	-323.646
0.04325	-20.045	-322.518
0.0433	-18.4307	-326.027
0.04335	-22.6422	-324.35
0.0434	-23.446	-320.699
0.04345	-25.3229	-326.172
0.0435	-22.0663	-324.071
0.04355	-19.9473	-326.128
0.0436	-21.8793	-319.985
0.04365	-21.6303	-319.784
0.0437	-22.8974	-324.094
0.04375	-24.2062	-317.426
0.0438	-19.5827	-323.423
0.04385	-23.572	-320.684
0.0439	-25.5417	-320.585
0.04395	-23.9247	-321.647
0.044	-22.1573	-322.182
0.04405	-20.6326	-321.976
0.0441	-22.8018	-323.192
0.04415	-23.0851	-320.597
0.0442	-27.5808	-317.95
0.04425	-21.7375	-322.674
0.0443	-18.0299	-321.896
0.04435	-23.9184	-323.245
0.0444	-24.6625	-318.235
0.04445	-24.8208	-318.244
0.0445	-24.5117	-318.555
0.04455	-23.9343	-319.506
0.0446	-24.1251	-319.067
0.04465	-28.2707	-313.6
0.0447	-22.1767	-319.496
0.04475	-25.2105	-317.154
0.0448	-26.2823	-318.681
0.04485	-26.4138	-320.426
0.0449	-24.1353	-323.585
0.04495	-20.4141	-324.769
0.045	-19.4086	-325.021
0.04505	-20.1786	-322.753
0.0451	-19.4304	-326.058
0.04515	-23.1277	-319.862
0.0452	-20.8009	-319.902
0.04525	-21.3471	-321.511
0.0453	-26.4016	-316.614
0.04535	-24.8136	-323.365
0.0454	-14.5665	-330.062
0.04545	-23.7277	-324.714
0.0455	-22.3581	-322.633
0.04555	-20.9258	-324.899
0.0456	-20.7238	-324.733
0.04565	-23.4232	-319.851
0.0457	-23.2082	-322.068
0.04575	-22.6017	-324.424
0.0458	-25.7601	-323.823
0.04585	-15.2756	-327.359
0.0459	-21.4345	-325.012
0.04595	-20.4267	-325.371
0.046	-14.9455	-326.603
0.04605	-18.6496	-328.195
0.0461	-23.9187	-323.386
0.04615	-26.4972	-323.105
0.0462	-27.9313	-319.021
0.04625	-25.8735	-319.648
0.0463	-22.7976	-323.407
0.04635	-28.5841	-321.435
0.0464	-21.9432	-325.305
0.04645	-28.4631	-324.485
0.0465	-21.2126	-327.057
0.04655	-27.587	-321.345
0.0466	-20.9206	-322.905
0.04665	-22.1753	-322.47
0.0467	-21.2089	-322.148
0.04675	-26.1051	-318.353
0.0468	-26.2653	-318.106
0.04685	-27.9927	-319.343
0.0469	-28.028	-318.983
0.04695	-27.4175	-314.77
0.047	-29.7788	-316.659
0.04705	-26.1358	-322.58
0.0471	-22.2337	-321.501
0.04715	-23.4509	-319.545
0.0472	-21.2963	-324.022
0.04725	-21.8048	-319.78
0.0473	-25.9837	-319.534
0.04735	-26.1466	-319.34
0.0474	-21.5281	-318.444
0.04745	-22.7577	-321.387
0.0475	-26.1529	-319.133
0.04755	-22.1811	-318.189
0.0476	-24.9135	-318.329
0.04765	-24.0972	-322.593
0.0477	-23.0972	-322.48
0.04775	-20.2378	-322.763
0.0478	-23.292	-321.227
0.04785	-23.5178	-320.621
0.0479	-21.1527	-325.886
0.04795	-19.1017	-323.275
0.048	-18.7569	-324.765
0.04805	-24.5352	-323.979
0.0481	-15.025	-326.713
0.04815	-13.5317	-329.677
0.0482	-19.9941	-323.636
0.04825	-16.6159	-323.654
0.0483	-23.4035	-321.402
0.04835	-20.8851	-324.879
0.0484	-20.119	-324.736
0.04845	-20.7818	-323.259
0.0485	-19.6422	-324.897
0.04855	-24.3098	-323.262
0.0486	-24.0574	-323.039
0.04865	-26.3886	-317.613
0.0487	-25.5173	-319.494
0.04875	-28.6746	-314.483
0.0488	-27.8125	-318.429
0.04885	-26.6039	-318.97
0.0489	-22.0792	-318.916
0.04895	-27.6229	-316.155
0.049	-19.9933	-317.912
0.04905	-24.9923	-318.025
0.0491	-24.4641	-321.712
0.04915	-28.1705	-313.396
0.0492	-27.571	-315.126
0.04925	-26.503	-313.154
0.0493	-26.7947	-312.485
0.04935	-20.9332	-319.138
0.0494	-23.514	-317.448
0.04945	-24.2744	-317.424
0.0495	-19.2497	-317.274
0.04955	-21.8439	-314.8
0.0496	-19.3371	-320.682
0.04965	-18.091	-319.005
0.0497	-24.608	-317.801
0.04975	-15.5929	-323.647
0.0498	-20.7698	-318.899
0.04985	-20.3824	-317.551
0.0499	-19.5643	-322.032
0.04995	-21.7828	-322.572
0.05	-22.0781	-316.879
0.05005	-22.3423	-319.961
0.0501	-22.7733	-318.901
0.05015	-19.3237	-320.789
0.0502	-20.0927	-318.906
0.05025	-20.8132	-317.701
0.0503	-22.5435	-316.721
0.05035	-19.0284	-320.818
0.0504	-17.2268	-322.444
0.05045	-19.5421	-322.385
0.0505	-21.4339	-317.375
0.05055	-18.967	-323.477
0.0506	-24.2888	-315.344
0.05065	-25.6525	-317.818
0.0507	-21.0772	-321.174
0.05075	-23.755	-319.822
0.0508	-20.9733	-322.331
0.05085	-22.7565	-315.537
0.0509	-20.6744	-322.981
0.05095	-24.1466	-315.882
0.051	-23.1697	-321.071
0.05105	-27.1479	-313.945
0.0511	-24.7193	-321.179
0.05115	-23.8529	-318.283
0.0512	-23.5489	-318.822
0.05125	-20.8047	-318.614
0.0513	-18.9819	-317.242
0.05135	-26.367	-316.175
0.0514	-18.2672	-321.724
0.05145	-25.5784	-317.779
0.0515	-23.7134	-317.86
0.05155	-28.6591	-318.94
0.0516	-21.5058	-317.233
0.05165	-22.8641	-319.12
0.0517	-25.019	-314.863
0.05175	-24.0187	-315.011
0.0518	-20.7511	-320.344
0.05185	-24.3847	-319.436
0.0519	-21.8604	-312.506
0.05195	-20.9254	-318.37
0.052	-20.1051	-318.526
0.05205	-25.8405	-314.477
0.0521	-22.3333	-317.825
0.05215	-21.4457	-324.393
0.0522	-24.7884	-312.501
0.05225	-21.6498	-321.508
0.0523	-20.4878	-322.856
0.05235	-20.4999	-319.452
0.0524	-24.203	-313.516
0.05245	-23.9945	-317.577
0.0525	-24.4479	-316.186
0.05255	-25.1203	-313.125
0.0526	-21.5015	-320.838
0.05265	-24.4192	-318.961
0.0527	-21.0933	-318.604
0.05275	-24.4439	-320.584
0.0528	-21.2407	-321.414
0.05285	-20.6206	-318.878
0.0529	-26.1708	-316.637
0.05295	-23.7187	-319.015
0.053	-23.4763	-321.096
0.05305	-24.9817	-318.716
0.0531	-28.1273	-316.377
0.05315	-25.0947	-321.629
0.0532	-22.834	-321.801
0.05325	-20.6355	-318.966
0.0533	-22.3538	-315.607
0.05335	-25.0436	-318.896
0.0534	-23.7023	-317.402
0.05345	-21.3993	-320.497
0.0535	-26.6598	-318.63
0.05355	-18.7655	-324.906
0.0536	-21.7817	-322.974
0.05365	-23.8997	-319.119
0.0537	-25.6329	-317.646
0.05375	-16.7537	-322.294
0.0538	-26.6044	-315.381
0.05385	-25.5406	-317.818
0.0539	-23.9538	-317.474
0.05395	-28.9272	-315.944
0.054	-25.9323	-315.096
0.05405	-24.1014	-321.023
0.0541	-19.2046	-321.717
0.05415	-18.1706	-325.106
0.0542	-17.1387	-324.624
0.05425	-21.1344	-321.114
0.0543	-20.6468	-318.534
0.05435	-20.2704	-319.096
0.0544	-14.3047	-325.341
0.05445	-21.7523	-319.877
0.0545	-13.8268	-322.079
0.05455	-21.6248	-325.164
0.0546	-25.495	-324.222
0.05465	-19.9787	-322.099
0.0547	-17.0391	-324.252
0.05475	-17.9995	-323.692
0.0548	-23.8502	-320.051
0.05485	-25.7566	-319.986
0.0549	-23.5146	-318.537
0.05495	-23.154	-321.746
0.055	-27.4916	-318.915
0.05505	-25.0289	-325.857
0.0551	-24.2246	-323.995
0.05515	-22.953	-319.936
0.0552	-20.5455	-327.706
0.05525	-21.0748	-323.357
0.0553	-21.2601	-324.961
0.05535	-20.0854	-322.749
0.0554	-21.6042	-324.297
0.05545	-20.5016	-327.042
0.0555	-19.5935	-326.671
0.05555	-24.2881	-320.067
0.0556	-26.5953	-320.687
0.05565	-23.994	-323.948
0.0557	-23.1546	-322.135
0.05575	-26.7544	-318.416
0.0558	-25.1432	-319.016
0.05585	-27.4404	-312.099
0.0559	-23.026	-319.008
0.05595	-22.0596	-319.925
0.056	-26.1088	-316.305
0.05605	-24.1305	-315.131
0.0561	-22.0441	-320.842
0.05615	-23.6451	-318.396
0.0562	-22.0599	-314.485
0.05625	-20.8655	-314.307
0.0563	-19.1964	-320.342
0.05635	-24.8278	-315.201
0.0564	-25.3935	-315.88
0.05645	-21.0554	-318.051
0.0565	-21.6005	-321.213
0.05655	-16.6999	-324.407
0.0566	-20.5273	-321.133
0.05665	-20.5973	-319.314
0.0567	-19.943	-318.458
0.05675	-19.4424	-320.093
0.0568	-17.0394	-328.155
0.05685	-22.2469	-321.554
0.0569	-15.7519	-324.113
0.05695	-16.551	-323.739
0.057	-20.3088	-322.801
0.05705	-16.8396	-323.927
0.0571	-19.0635	-324.976
0.05715	-14.7032	-325.052
0.0572	-20.1534	-319.807
0.05725	-22.7469	-320.066
0.0573	-22.2194	-317.368
0.05735	-22.7334	-318.94
0.0574	-17.9164	-324.109
0.05745	-15.7669	-325.358
0.0575	-18.9421	-325.818
0.05755	-22.7093	-320.847
0.0576	-22.9149	-322.75
0.05765	-23.6118	-318.106
0.0577	-23.1837	-321.106
0.05775	-26.8552	-317.764
0.0578	-25.416	-318.44
0.05785	-25.3774	-318.471
0.0579	-26.2054	-316.763
0.05795	-28.9678	-318.183
0.058	-22.1954	-322.317
0.05805	-21.398	-320.053
0.0581	-26.5164	-320.383
0.05815	-25.1667	-319.384
0.0582	-28.215	-317.585
0.05825	-28.7302	-320.805
0.0583	-26.6624	-318.008
0.05835	-20.7015	-320.27
0.0584	-25.589	-315.534
0.05845	-25.1914	-314.722
0.0585	-18.8797	-319.719
0.05855	-29.9977	-315.807
0.0586	-27.8317	-318.267
0.05865	-27.8029	-313.539
0.0587	-19.1755	-323.283
0.05875	-22.9432	-322.512
0.0588	-22.2623	-321.654
0.05885	-26.7002	-318.187
0.0589	-22.469	-318.941
0.05895	-24.6823	-322.754
0.059	-21.8072	-319.958
0.05905	-21.4188	-318.961
0.0591	-20.6051	-321.165
0.05915	-20.2987	-321.053
0.0592	-20.1137	-321.484
0.05925	-22.6232	-321.194
0.0593	-19.2476	-323.74
0.05935	-22.3636	-326.208
0.0594	-22.2807	-324.657
0.05945	-22.5386	-323.94
0.0595	-24.2844	-316.06
0.05955	-23.9052	-319.566
0.0596	-23.5368	-314.346
0.05965	-17.509	-325.787
0.0597	-23.4642	-321.999
0.05975	-21.9856	-319.65
0.0598	-20.1669	-322.94
0.05985	-22.6622	-324.633
0.0599	-18.2265	-319.047
0.05995	-17.023	-326.229
0.06	-24.7764	-319.906
0.06005	-26.7739	-317.783
0.0601	-23.5609	-318.27
0.06015	-26.5785	-314.623
0.0602	-29.6269	-317.211
0.06025	-23.1354	-318.395
0.0603	-24.5139	-320.239
0.06035	-24.4397	-317.456
0.0604	-24.4665	-319.001
0.06045	-23.3623	-319.448
0.0605	-26.0875	-320.893
0.06055	-27.204	-314.811
0.0606	-17.2083	-324.802
0.06065	-25.046	-317.125
0.0607	-20.6873	-322.351
0.06075	-26.2451	-315.344
0.0608	-28.4223	-318.195
0.06085	-28.2675	-317.51
0.0609	-24.0579	-318.629
0.06095	-21.9189	-321.576
0.061	-17.2595	-319.84
0.06105	-20.5292	-322.154
0.0611	-22.3901	-319.243
0.06115	-23.8358	-316.727
0.0612	-24.1752	-320.4
0.06125	-22.005	-317.998
0.0613	-18.6186	-324.341
0.06135	-21.7286	-318.866
0.0614	-20.1766	-318.584
0.06145	-17.2658	-321.15
0.0615	-22.5421	-319.653
0.06155	-21.0248	-320.808
0.0616	-22.056	-320.154
0.06165	-19.3788	-322.13
0.0617	-22.0172	-320.126
0.06175	-25.6608	-313.103
0.0618	-21.334	-321.237
0.06185	-22.4479	-321.865
0.0619	-23.0891	-320.575
0.06195	-27.5417	-318.989
0.062	-27.6707	-316.501
0.06205	-24.9964	-316.414
0.0621	-28.6156	-318.768
0.06215	-22.9081	-322.573
0.0622	-23.0998	-321.923
0.06225	-18.7193	-325.008
0.0623	-20.2132	-320.808
0.06235	-19.0742	-326.725
0.0624	-21.0954	-325.146
0.06245	-19.7608	-324.935
0.0625	-22.194	-323.106
0.06255	-23.6947	-319.639
0.0626	-24.1272	-319.385
0.06265	-22.1391	-320.832
0.0627	-24.6064	-319.523
0.06275	-22.6882	-317.517
0.0628	-22.6152	-321.741
0.06285	-21.8649	-320.976
0.0629	-23.3277	-319.569
0.06295	-22.8351	-320.162
0.063	-23.0716	-321.477
0.06305	-26.4836	-317.786
0.0631	-25.5571	-320.075
0.06315	-24.1955	-321.248
0.0632	-24.0786	-318.387
0.06325	-24.5208	-322.309
0.0633	-19.8969	-319.228
0.06335	-23.6661	-317.658
0.0634	-21.5422	-318.962
0.06345	-22.8464	-321.661
0.0635	-19.395	-323.216
0.06355	-18.7388	-325.454
0.0636	-13.8402	-326.395
0.06365	-24.897	-318.462
0.0637	-23.1679	-318.432
0.06375	-23.8647	-318.507
0.0638	-19.5932	-320.921
0.06385	-18.8798	-324.654
0.0639	-18.8045	-326.593
0.06395	-21.7872	-321.963
0.064	-24.6039	-320.231
0.06405	-17.5702	-324.512
0.0641	-20.4431	-315.994
0.06415	-24.4435	-322.566
0.0642	-22.8037	-322.181
0.06425	-15.7272	-323.731
0.0643	-22.5836	-322.303
0.06435	-21.4276	-324.094
0.0644	-16.5722	-323.489
0.06445	-21.0126	-321.909
0.0645	-25.3042	-321.44
0.06455	-23.939	-321.954
0.0646	-19.0054	-322.645
0.06465	-23.2703	-322.176
0.0647	-25.9741	-322.407
0.06475	-29.1107	-317.333
0.0648	-24.3592	-322.636
0.06485	-22.5015	-322.983
0.0649	-21.2988	-326.153
0.06495	-24.2856	-322.013
0.065	-23.1422	-324.833
0.06505	-21.5423	-325.562
0.0651	-24.8409	-321.913
0.06515	-27.2633	-325.089
0.0652	-25.3385	-318.822
0.06525	-25.2583	-321.353
0.0653	-29.4844	-317.306
0.06535	-24.1718	-319.069
0.0654	-23.5578	-317.495
0.06545	-26.2948	-317.151
0.0655	-23.2691	-319.52
0.06555	-26.2852	-317.279
0.0656	-23.107	-323.042
0.06565	-24.4807	-320.27
0.0657	-17.5419	-325.207
0.06575	-18.0829	-322.82
0.0658	-18.8087	-323.211
0.06585	-16.2269	-328.128
0.0659	-18.3578	-324.53
0.06595	-19.2147	-321.193
0.066	-18.6241	-325.035
0.06605	-19.8879	-325.808
0.0661	-19.4104	-325.036
0.06615	-18.8362	-324.591
0.0662	-16.1412	-323.392
0.06625	-17.1076	-324.637
0.0663	-19.7363	-324.573
0.06635	-22.14	-327.371
0.0664	-22.7928	-326.571
0.06645	-21.4746	-325.731
0.0665	-18.4106	-325.151
0.06655	-22.7509	-321.504
0.0666	-23.8618	-322.893
0.06665	-19.3986	-325.628
0.0667	-21.4974	-322.265
0.06675	-23.1083	-321.032
0.0668	-22.8896	-324.973
0.06685	-15.8696	-328.013
0.0669	-24.1552	-324.118
0.06695	-20.2686	-322.637
0.067	-22.6363	-321.273
0.06705	-22.9125	-318.33
0.0671	-21.7509	-323.264
0.06715	-21.1715	-325.452
0.0672	-21.9044	-321.389
0.06725	-19.4487	-329.026
0.0673	-26.7938	-325.506
0.06735	-23.0018	-326.506
0.0674	-17.8772	-327.868
0.06745	-17.134	-328.759
0.0675	-25.6904	-322.803
0.06755	-25.0005	-326.912
0.0676	-23.228	-325.465
0.06765	-19.5428	-322.818
0.0677	-23.6728	-323.297
0.06775	-21.8772	-323.193
0.0678	-22.0005	-317.865
0.06785	-21.7571	-321.105
0.0679	-19.7093	-323.228
0.06795	-21.7739	-320.339
0.068	-24.2363	-319.4
0.06805	-24.7433	-319.188
0.0681	-26.5008	-317.17
0.06815	-21.2085	-326.056
0.0682	-20.2606	-320.937
0.06825	-23.2613	-320.708
0.0683	-16.1807	-321.361
0.06835	-14.6024	-323.093
0.0684	-19.1631	-324.024
0.06845	-24.3989	-314.901
0.0685	-23.1045	-318.558
0.06855	-18.6958	-321.849
0.0686	-15.7538	-327.841
0.06865	-18.334	-326.09
0.0687	-26.2141	-319.829
0.06875	-21.2341	-323.457
0.0688	-24.6849	-324.91
0.06885	-25.9055	-321.479
0.0689	-26.8695	-322.853
0.06895	-27.0475	-325.504
0.069	-21.3848	-324.33
0.06905	-21.3735	-321.803
0.0691	-26.0027	-324.234
0.06915	-23.5844	-322.036
0.0692	-20.3324	-325.762
0.06925	-23.7119	-324.671
0.0693	-26.8465	-322.247
0.06935	-24.906	-322.963
0.0694	-24.8943	-323.883
0.06945	-26.2755	-321.181
0.0695	-24.5743	-322.505
0.06955	-23.6848	-323.514
0.0696	-21.9906	-326.531
0.06965	-22.4892	-324.039
0.0697	-18.3083	-327.01
0.06975	-18.152	-322.937
0.0698	-18.1441	-320.613
0.06985	-16.7606	-325.523
0.0699	-22.4991	-318.196
0.06995	-19.9655	-324.129
0.07	-23.9138	-321.142
0.07005	-20.7036	-322.93
0.0701	-20.2772	-319.249
0.07015	-16.234	-321.793
0.0702	-18.5654	-320.657
0.07025	-18.914	-321.355
0.0703	-18.9872	-318.133
0.07035	-22.9879	-317.918
0.0704	-22.3246	-320.394
0.07045	-22.2862	-320.728
0.0705	-19.0359	-324.431
0.07055	-21.5842	-321.589
0.0706	-19.405	-324.461
0.07065	-22.628	-322.295
0.0707	-15.7681	-324.632
0.07075	-19.9749	-322.941
0.0708	-23.2445	-317.482
0.07085	-21.0021	-321.597
0.0709	-23.3498	-322.269
0.07095	-24.8002	-322.066
0.071	-19.5891	-325.242
0.07105	-21.35	-323.534
0.0711	-19.5701	-323.03
0.07115	-21.0742	-320.674
0.0712	-16.8214	-326.244
0.07125	-17.702	-322.572
0.0713	-22.3857	-323.879
0.07135	-25.2778	-324.922
0.0714	-25.795	-318.91
0.07145	-22.264	-318.71
0.0715	-19.8107	-322.458
0.07155	-21.9507	-320.021
0.0716	-23.7289	-318.353
0.07165	-28.0957	-318.978
0.0717	-25.7902	-318.346
0.07175	-22.4672	-322.005
0.0718	-20.6006	-323.381
0.07185	-23.3322	-321.616
0.0719	-23.0182	-320.326
0.07195	-23.0463	-316.756
0.072	-22.9791	-314.734
0.07205	-17.8934	-322.737
0.0721	-17.855	-320.527
0.07215	-19.0723	-319.779
0.0722	-21.3066	-316.804
0.07225	-23.9606	-320.025
0.0723	-16.156	-324.129
0.07235	-18.2505	-322.331
0.0724	-17.8748	-325.577
0.07245	-17.0436	-321.984
0.0725	-22.3614	-317.142
0.07255	-22.6164	-322.059
0.0726	-19.8586	-319.934
0.07265	-21.4711	-319.933
0.0727	-21.8776	-321.532
0.07275	-17.1664	-327.709
0.0728	-17.2418	-323.198
0.07285	-14.9183	-326.882
0.0729	-16.0925	-325.917
0.07295	-24.4562	-320.369
0.073	-21.1578	-325.156
0.07305	-19.0867	-326.556
0.0731	-23.214	-318.742
0.07315	-18.7216	-323.912
0.0732	-16.3459	-324.452
0.07325	-22.8723	-323.944
0.0733	-22.9167	-322.694
0.07335	-22.0482	-316.261
0.0734	-22.8527	-320.688
0.07345	-24.8773	-318.069
0.0735	-26.2102	-321.036
0.07355	-21.8368	-325.91
0.0736	-19.0493	-327.698
0.07365	-18.8057	-326.37
0.0737	-22.3717	-319.827
0.07375	-20.8893	-323.127
0.0738	-16.6477	-325.835
0.07385	-20.7942	-324.502
0.0739	-18.6754	-323.517
0.07395	-17.5737	-320.561
0.074	-20.2603	-318.902
0.07405	-23.2436	-322.141
0.0741	-26.2029	-321.819
0.07415	-23.6389	-319.904
0.0742	-23.6701	-321.502
0.07425	-19.4937	-322.762
0.0743	-16.2671	-326.319
0.07435	-20.3273	-324.731
0.0744	-24.3894	-321.465
0.07445	-25.3834	-317.773
0.0745	-25.7981	-324.595
0.07455	-19.5266	-322.383
0.0746	-23.628	-322.497
0.07465	-20.7582	-322.745
0.0747	-22.2224	-319.457
0.07475	-18.6311	-323.457
0.0748	-22.5256	-315.954
0.07485	-18.4278	-324.537
0.0749	-21.6175	-319.195
0.07495	-23.487	-321.038
0.075	-22.7865	-321.033
0.07505	-17.8478	-324.489
0.0751	-18.4182	-325.585
0.07515	-18.2272	-321.756
0.0752	-23.4383	-315.911
0.07525	-27.0119	-318.496
0.0753	-21.721	-326.98
0.07535	-19.8094	-324.606
0.0754	-22.3326	-321.973
0.07545	-24.6031	-318.284
0.0755	-19.2728	-325.932
0.07555	-22.5727	-321.363
0.0756	-18.3186	-326.189
0.07565	-24.0934	-323.975
0.0757	-22.4108	-324.715
0.07575	-18.0759	-325.672
0.0758	-17.4536	-327.303
0.07585	-21.149	-324.843
0.0759	-23.7	-323.285
0.07595	-26.7956	-321.993
0.076	-22.9307	-322.743
0.07605	-22.0625	-324.306
0.0761	-22.6457	-320.951
0.07615	-22.3236	-322.815
0.0762	-16.9409	-325.156
0.07625	-20.0186	-329.245
0.0763	-22.5365	-320.157
0.07635	-22.2752	-322.501
0.0764	-17.8106	-319.896
0.07645	-16.3134	-324.887
0.0765	-18.2775	-320.353
0.07655	-18.9425	-325.229
0.0766	-20.9051	-321.463
0.07665	-21.6431	-320.303
0.0767	-16.2536	-324.806
0.07675	-13.8544	-327.231
0.0768	-16.0821	-327.106
0.07685	-21.8581	-322.614
0.0769	-18.9033	-324.398
0.07695	-20.7724	-323.753
0.077	-20.3666	-323.491
0.07705	-21.7108	-321.523
0.0771	-18.9691	-322.061
0.07715	-20.0251	-321.52
0.0772	-22.2108	-322.933
0.07725	-19.0921	-322.966
0.0773	-23.5072	-322.673
0.07735	-25.2017	-321.85
0.0774	-17.2246	-323.035
0.07745	-18.7114	-325.221
0.0775	-24.0286	-322.091
0.07755	-18.3568	-322.697
0.0776	-16.8177	-323.266
0.07765	-15.1548	-325.291
0.0777	-22.0685	-321.556
0.07775	-20.0727	-321.544
0.0778	-17.582	-326.158
0.07785	-19.442	-321.606
0.0779	-17.4495	-324.391
0.07795	-20.9438	-320.003
0.078	-18.6178	-325.774
0.07805	-18.5221	-324.389
0.0781	-21.5211	-322.313
0.07815	-21.6369	-322.936
0.0782	-18.0959	-327.706
0.07825	-17.2215	-325.055
0.0783	-18.7982	-323.519
0.07835	-23.6544	-320.69
0.0784	-21.9269	-318.783
0.07845	-20.9022	-321.68
0.0785	-25.807	-320.116
0.07855	-16.758	-324.482
0.0786	-14.4882	-325
0.07865	-17.8739	-323.501
0.0787	-15.4179	-320.04
0.07875	-18.8513	-321.837
0.0788	-15.3776	-324.046
0.07885	-24.0775	-318.069
0.0789	-21.1625	-320.584
0.07895	-19.3059	-323.908
0.079	-23.8796	-314.165
0.07905	-17.5948	-322.888
0.0791	-19.0319	-324.946
0.07915	-14.6382	-326.062
0.0792	-18.5091	-323.408
0.07925	-16.1463	-321.677
0.0793	-22.3919	-326.707
0.07935	-11.7553	-326.818
0.0794	-15.7053	-322.077
0.07945	-19.3766	-321.546
0.0795	-15.8276	-322.92
0.07955	-17.7106	-323.474
0.0796	-22.6843	-324.346
0.07965	-21.883	-321.03
0.0797	-17.314	-323.92
0.07975	-21.3121	-320.363
0.0798	-16.9768	-320.577
0.07985	-22.3459	-314.023
0.0799	-24.5457	-313.249
0.07995	-18.1646	-321.223
0.08	-16.8411	-320.267
0.08005	-21.7983	-321.129
0.0801	-20.1652	-325.822
0.08015	-20.6894	-325.53
0.0802	-20.0605	-322.087
0.08025	-21.8562	-320.573
0.0803	-17.413	-327.853
0.08035	-19.2214	-325.949
0.0804	-18.0033	-327.016
0.08045	-24.1717	-316.683
0.0805	-16.6609	-327.23
0.08055	-13.7127	-327.903
0.0806	-16.6467	-326.193
0.08065	-21.5804	-328.374
0.0807	-13.8243	-330.463
0.08075	-19.9878	-324.738
0.0808	-19.8154	-324.272
0.08085	-17.1804	-322.834
0.0809	-12.4194	-326.154
0.08095	-17.2636	-321.76
0.081	-23.7822	-318.429
0.08105	-22.7532	-315.771
0.0811	-17.979	-326.482
0.08115	-15.1193	-328.614
0.0812	-17.0414	-325.703
0.08125	-22.1539	-323.147
0.0813	-21.5706	-321.714
0.08135	-21.449	-325.227
0.0814	-20.4728	-322.092
0.08145	-18.5592	-326.231
0.0815	-22.8288	-323.711
0.08155	-19.2013	-322.52
0.0816	-21.589	-319.594
0.08165	-20.7686	-319.947
0.0817	-21.7099	-324.566
0.08175	-17.5624	-326.347
0.0818	-15.5105	-321.277
0.08185	-20.1768	-320.016
0.0819	-19.9459	-322.293
0.08195	-18.302	-323.772
0.082	-19.6197	-320.339
0.08205	-14.8967	-323.781
0.0821	-20.81	-319.471
0.08215	-13.4654	-325.534
0.0822	-13.4798	-324.63
0.08225	-13.1623	-323.475
0.0823	-22.7659	-317.864
0.08235	-21.9436	-320.116
0.0824	-15.0805	-322.227
0.08245	-21.3008	-322.719
0.0825	-25.5654	-315.77
0.08255	-20.9843	-318.602
0.0826	-25.6179	-316.045
0.08265	-18.0487	-323.951
0.0827	-20.7948	-319.935
0.08275	-23.2426	-317.959
0.0828	-18.617	-320.216
0.08285	-21.2045	-323.821
0.0829	-17.0297	-323.613
0.08295	-16.6756	-325.758
0.083	-18.1738	-321.641
0.08305	-22.7805	-317.105
0.0831	-19.7884	-319.545
0.08315	-21.727	-320.118
0.0832	-22.5487	-316.725
0.08325	-22.8858	-320.066
0.0833	-22.1004	-317.87
0.08335	-20.6382	-321.114
0.0834	-18.3443	-323.028
0.08345	-16.7029	-321.515
0.0835	-22.1494	-320.17
0.08355	-19.4851	-318.683
0.0836	-16.7416	-324.708
0.08365	-24.3285	-318.706
0.0837	-22.4113	-322.041
0.08375	-19.0588	-320.186
0.0838	-18.6321	-317.901
0.08385	-16.0433	-319.903
0.0839	-22.4261	-314.793
0.08395	-19.006	-320.628
0.084	-22.8939	-316.817
0.08405	-22.464	-318.658
0.0841	-21.2437	-317.947
0.08415	-23.6617	-318.86
0.0842	-16.4943	-323.418
0.08425	-15.0446	-324.649
0.0843	-22.5545	-316.778
0.08435	-24.1617	-315.467
0.0844	-18.17	-322.253
0.08445	-22.4309	-314.813
0.0845	-18.2348	-320.275
0.08455	-19.399	-314.584
0.0846	-21.89	-320.785
0.08465	-21.9445	-311.468
0.0847	-18.5495	-321.358
0.08475	-22.9252	-320.908
0.0848	-17.0415	-324.191
0.08485	-19.3122	-326.084
0.0849	-16.8617	-327.639
0.08495	-12.193	-326.721
0.085	-13.3188	-327.183
0.08505	-22.5389	-319.644
0.0851	-14.5013	-325.224
0.08515	-22.5787	-323.26
0.0852	-24.108	-322.174
0.08525	-18.2301	-325.269
0.0853	-19.1413	-321.417
0.08535	-16.1604	-323.422
0.0854	-23.0485	-324.397
0.08545	-22.7976	-314.853
0.0855	-22.8964	-323.069
0.08555	-19.636	-322.957
0.0856	-13.3252	-324.169
0.08565	-18.6438	-323.134
0.0857	-27.6747	-313.432
0.08575	-25.8443	-310.298
0.0858	-13.4419	-322.819
0.08585	-17.4118	-318.482
0.0859	-12.8968	-324.241
0.08595	-18.5536	-320.588
0.086	-19.8266	-319.454
0.08605	-20.3106	-321.392
0.0861	-21.147	-318.182
0.08615	-19.7841	-317.53
0.0862	-20.1505	-315.634
0.08625	-21.5945	-315.422
0.0863	-12.7952	-321.298
0.08635	-17.9963	-319.665
0.0864	-15.1109	-323.736
0.08645	-14.2608	-318.141
0.0865	-22.692	-318.693
0.08655	-15.0384	-324.271
0.0866	-21.7549	-319.027
0.08665	-13.4391	-323.03
0.0867	-18.5328	-323.208
0.08675	-14.3908	-322.112
0.0868	-17.7882	-323.703
0.08685	-16.6893	-322.93
0.0869	-16.7397	-326.231
0.08695	-15.7636	-329.586
0.087	-18.3359	-325.156
0.08705	-18.4484	-327.213
0.0871	-20.9174	-324.24
0.08715	-23.0112	-321.355
0.0872	-23.909	-323.074
0.08725	-21.8871	-329.617
0.0873	-23.41	-324.325
0.08735	-17.2327	-323.25
0.0874	-23.4401	-320.743
0.08745	-22.7043	-322.116
0.0875	-16.0784	-327.566
0.08755	-13.7565	-328.994
0.0876	-19.7333	-326.206
0.08765	-16.4178	-325.276
0.0877	-16.2964	-328.361
0.08775	-22.3144	-322.102
0.0878	-22.6148	-320.332
0.08785	-25.9428	-318.379
0.0879	-23.6751	-320.012
0.08795	-17.1508	-324.446
0.088	-20.3882	-325.436
0.08805	-23.2825	-322.89
0.0881	-19.3986	-328.373
0.08815	-20.6128	-325.108
0.0882	-21.0958	-319.74
0.08825	-18.4719	-323.703
0.0883	-25.2672	-315.473
0.08835	-23.7783	-319.466
0.0884	-23.2193	-315.691
0.08845	-27.5828	-314.172
0.0885	-23.1139	-316.249
0.08855	-21.2248	-319.972
0.0886	-23.1542	-320.387
0.08865	-24.5003	-318.97
0.0887	-17.4795	-323.711
0.08875	-17.4054	-319.811
0.0888	-22.8713	-318.151
0.08885	-20.3594	-321.358
0.0889	-20.8857	-320.655
0.08895	-21.8889	-322.26
0.089	-24.8726	-317.166
0.08905	-20.5164	-323.131
0.0891	-20.0581	-323.046
0.08915	-18.3077	-325.181
0.0892	-24.9143	-322.38
0.08925	-25.9391	-317.097
0.0893	-16.3825	-321.763
0.08935	-18.1448	-322.137
0.0894	-23.5075	-317.566
0.08945	-19.4508	-320.189
0.0895	-24.7606	-318.417
0.08955	-24.5012	-318.233
0.0896	-24.0682	-321.223
0.08965	-21.5532	-321.954
0.0897	-23.3008	-321.867
0.08975	-21.1301	-327.468
0.0898	-21.544	-325.299
0.08985	-23.706	-321.064
0.0899	-23.7281	-318.237
0.08995	-22.9101	-317.996
0.09	-23.7107	-319.8
0.09005	-26.9737	-319.565
0.0901	-20.4553	-325.311
0.09015	-25.8662	-322.106
0.0902	-22.3886	-324.414
0.09025	-22.6795	-321.564
0.0903	-22.8341	-319.495
0.09035	-21.2453	-322.375
0.0904	-24.6246	-321.896
0.09045	-22.0786	-324.806
0.0905	-25.6063	-320.85
0.09055	-19.7515	-317.495
0.0906	-20.492	-322.608
0.09065	-26.1722	-319.031
0.0907	-25.8272	-316.85
0.09075	-23.9284	-314.884
0.0908	-24.9732	-318.564
0.09085	-23.9175	-319.518
0.0909	-27.418	-317.474
0.09095	-22.7578	-321.58
0.091	-23.1279	-320.466
0.09105	-21.4081	-319.855
0.0911	-23.7251	-319.295
0.09115	-23.4252	-322.062
0.0912	-27.5163	-319.142
0.09125	-19.5394	-321.874
0.0913	-21.1566	-322.219
0.09135	-21.9971	-323.009
0.0914	-20.4427	-321.237
0.09145	-18.723	-323.419
0.0915	-21.2033	-323.401
0.09155	-21.8674	-320.587
0.0916	-21.9828	-317.815
0.09165	-19.6187	-322.417
0.0917	-22.2702	-319.459
0.09175	-21.1675	-324.51
0.0918	-21.9228	-322.726
0.09185	-17.9275	-325.202
0.0919	-21.7243	-322.382
0.09195	-24.2443	-320.436
0.092	-21.9132	-319.853
0.09205	-26.6485	-319.774
0.0921	-25.0654	-324.039
0.09215	-21.9684	-321.396
0.0922	-24.0547	-322.492
0.09225	-17.1753	-326.156
0.0923	-24.8753	-322.876
0.09235	-20.5392	-324.725
0.0924	-17.446	-329.801
0.09245	-22.3773	-323.588
0.0925	-21.7985	-322.454
0.09255	-19.411	-324.731
0.0926	-22.0109	-322.859
0.09265	-22.9011	-321.377
0.0927	-23.234	-322.234
0.09275	-25.5492	-317.571
0.0928	-24.8021	-321.486
0.09285	-22.6406	-320.984
0.0929	-26.7866	-320.114
0.09295	-24.2787	-318.738
0.093	-23.9001	-321.892
0.09305	-18.9396	-323.093
0.0931	-22.6472	-319.48
0.09315	-22.5184	-324.261
0.0932	-22.3869	-323.384
0.09325	-20.9682	-324.317
0.0933	-19.0406	-324.387
0.09335	-17.9314	-325.898
0.0934	-20.1314	-324.555
0.09345	-19.139	-325.627
0.0935	-15.9449	-327.565
0.09355	-15.3276	-328.525
0.0936	-20.3278	-324.585
0.09365	-21.3763	-329.021
0.0937	-15.8246	-326.12
0.09375	-25.9998	-323.532
0.0938	-17.5723	-325.803
0.09385	-14.2944	-325.808
0.0939	-15.2697	-328.362
0.09395	-13.4001	-328.38
0.094	-17.754	-324.708
0.09405	-10.786	-330.555
0.0941	-18.0907	-326.891
0.09415	-16.2844	-327.573
0.0942	-17.0603	-327.284
0.09425	-15.7277	-327.211
0.0943	-18.5093	-327.531
0.09435	-15.7228	-327.222
0.0944	-19.637	-326.4
0.09445	-25.9326	-324.271
0.0945	-23.4695	-326.789
0.09455	-16.1925	-326.204
0.0946	-21.9323	-326.76
0.09465	-14.4709	-328.682
0.0947	-16.268	-326.485
0.09475	-17.39	-327.067
0.0948	-24.0966	-317.979
0.09485	-22.2035	-323.513
0.0949	-22.8563	-324.327
0.09495	-21.2858	-320.551
0.095	-28.4543	-317.504
0.09505	-25.9945	-324.582
0.0951	-24.1566	-319.723
0.09515	-21.2236	-323.232
0.0952	-21.9916	-317.549
0.09525	-22.9703	-319.472
0.0953	-18.5704	-321.893
0.09535	-19.6616	-321.795
0.0954	-15.8741	-322.472
0.09545	-18.7972	-320.876
0.0955	-24.1689	-321.093
0.09555	-22.904	-327.51
0.0956	-21.2597	-317.632
0.09565	-20.0196	-320.747
0.0957	-17.5325	-326.651
0.09575	-16.9265	-326.022
0.0958	-14.3805	-323.397
0.09585	-17.6641	-320.285
0.0959	-17.5042	-320.768
0.09595	-22.8509	-323.071
0.096	-19.3584	-321.713
0.09605	-19.0205	-320.012
0.0961	-21.6262	-320.101
0.09615	-18.8074	-324.68
0.0962	-19.6376	-323.18
0.09625	-18.0643	-324.409
0.0963	-19.0995	-321.798
0.09635	-17.52	-322.995
0.0964	-13.2489	-323.269
0.09645	-17.9943	-326.736
0.0965	-20.5657	-322.821
0.09655	-23.4156	-319.309
0.0966	-21.4835	-321.82
0.09665	-20.1547	-321.041
0.0967	-26.4768	-317.307
0.09675	-24.4514	-319.659
0.0968	-22.2477	-322.221
0.09685	-20.9733	-323.585
0.0969	-25.2063	-319.205
0.09695	-19.8235	-323.328
0.097	-22.2628	-321.776
0.09705	-22.5057	-322.724
0.0971	-25.6482	-320.926
0.09715	-23.5221	-318.419
0.0972	-21.3099	-323.887
0.09725	-25.0743	-320.524
0.0973	-26.6565	-317.984
0.09735	-20.0712	-322.756
0.0974	-23.1305	-322.211
0.09745	-19.6767	-323.19
0.0975	-19.0565	-321.885
0.09755	-20.4112	-320.865
0.0976	-22.0095	-321.378
0.09765	-24.5812	-319.512
0.0977	-24.0577	-319.727
0.09775	-25.1749	-320.695
0.0978	-21.1133	-320.521
0.09785	-18.7611	-323.454
0.0979	-23.2291	-318.687
0.09795	-24.4618	-318.756
0.098	-19.0493	-322.017
0.09805	-24.5692	-320.989
0.0981	-24.4226	-320.693
0.09815	-24.6525	-322.085
0.0982	-23.9449	-321.409
0.09825	-22.2554	-320.022
0.0983	-18.7938	-325.193
0.09835	-21.7329	-322.149
0.0984	-22.8699	-320.569
0.09845	-24.8494	-320.328
0.0985	-15.8856	-325.229
0.09855	-22.8372	-323.833
0.0986	-21.9994	-324.06
0.09865	-16.0654	-325.549
0.0987	-20.4231	-322.715
0.09875	-21.3103	-323.735
0.0988	-21.7481	-324.061
0.09885	-24.0717	-325.059
0.0989	-25.0205	-320.515
0.09895	-25.4467	-317.965
0.099	-26.1872	-323.199
0.09905	-21.8734	-324.561
0.0991	-23.4825	-324.572
0.09915	-25.2734	-323.413
0.0992	-21.0421	-323.883
0.09925	-21.2079	-323.578
0.0993	-19.254	-321.456
0.09935	-24.7351	-324.476
0.0994	-25.8566	-323.017
0.09945	-23.2554	-320.935
0.0995	-22.9147	-320.153
0.09955	-24.1946	-314.98
0.0996	-23.6758	-316.69
0.09965	-23.8974	-322.226
0.0997	-23.7562	-320.345
0.09975	-24.0785	-318.118
[truncated: 198,377+ more rows]

## Sheet: G0 10uM
Dark-field trace				Fig.5D
E236A-WT/55		10uM ATP
20000 fps
time	X-axis	Y-axis
0	198.395	-343.276
5e-05	200.364	-343.193
0.0001	190.013	-340.885
0.00015	185.36	-348.107
0.0002	184.344	-345.051
0.00025	190.576	-342.364
0.0003	203.212	-344.503
0.00035	211.399	-348.712
0.0004	207.092	-349.365
0.00045	207.387	-346.988
0.0005	209.197	-347.769
0.00055	207.16	-348.774
0.0006	206.55	-347.626
0.00065	200.754	-344.77
0.0007	200.394	-344.156
0.00075	195.135	-340.405
0.0008	192.522	-346.567
0.00085	200.799	-346.489
0.0009	198.425	-350.917
0.00095	190.026	-350.855
0.001	191.946	-344.817
0.00105	199.273	-342.067
0.0011	192.67	-339.995
0.00115	192.755	-340.194
0.0012	186.389	-334.281
0.00125	190.449	-340.778
0.0013	199.436	-340.456
0.00135	199.72	-341.945
0.0014	197.875	-347.611
0.00145	199.88	-343.65
0.0015	205.321	-350.214
0.00155	207.107	-352.613
0.0016	205.838	-340.492
0.00165	197.91	-343.602
0.0017	207.33	-344.126
0.00175	204.618	-350.07
0.0018	191.402	-339.41
0.00185	200.634	-343.729
0.0019	198.905	-347.935
0.00195	196.922	-348.975
0.002	184.685	-345.351
0.00205	193.226	-346.281
0.0021	193.651	-345.512
0.00215	196.416	-340.607
0.0022	195.047	-346.744
0.00225	198.5	-343.983
0.0023	198.055	-338.294
0.00235	195.662	-343.675
0.0024	199.722	-342.509
0.00245	197.077	-342.838
0.0025	196.212	-343.844
0.00255	203.719	-342.551
0.0026	204.08	-350.421
0.00265	199.546	-351.345
0.0027	192.967	-342.217
0.00275	200.778	-343.213
0.0028	199.591	-343.743
0.00285	202.872	-341.326
0.0029	198.704	-344.122
0.00295	209.114	-351.129
0.003	199.218	-350.754
0.00305	185.138	-344.11
0.0031	204.495	-351.175
0.00315	191.693	-342.288
0.0032	194.233	-343.896
0.00325	193.555	-340.679
0.0033	190.136	-341.484
0.00335	196.577	-343.095
0.0034	199.255	-344.178
0.00345	203.344	-340.281
0.0035	198.765	-343.121
0.00355	206.254	-338.659
0.0036	199.13	-344.795
0.00365	206.012	-341.692
0.0037	204.398	-341.997
0.00375	198.675	-345.172
0.0038	206.603	-347.421
0.00385	208.085	-337.836
0.0039	196.306	-340.271
0.00395	203.606	-342.728
0.004	196.628	-348.186
0.00405	197.745	-347.738
0.0041	208.496	-351
0.00415	201.558	-343.827
0.0042	199.805	-342.281
0.00425	211.74	-342.392
0.0043	210.827	-349.218
0.00435	207.906	-340.865
0.0044	204.081	-345.97
0.00445	203.943	-338.757
0.0045	207.562	-342.89
0.00455	194.795	-344.398
0.0046	186.615	-340.102
0.00465	194.068	-340.466
0.0047	194.849	-339.291
0.00475	201.933	-344.304
0.0048	207.558	-347.999
0.00485	197.898	-338.547
0.0049	200.808	-338.377
0.00495	202.762	-339.082
0.005	196.075	-344.62
0.00505	196.14	-342.585
0.0051	207.37	-346.843
0.00515	207.933	-343.585
0.0052	206.122	-351.749
0.00525	202.489	-343.183
0.0053	192.775	-334.774
0.00535	198.344	-339.215
0.0054	206.938	-343.879
0.00545	207.078	-346.403
0.0055	205.939	-344.793
0.00555	198.649	-343.482
0.0056	198.528	-342.105
0.00565	196.547	-343.05
0.0057	195.156	-343.572
0.00575	201.074	-344.29
0.0058	197.845	-341.451
0.00585	190.09	-347.042
0.0059	194.114	-347.864
0.00595	194.749	-345.427
0.006	202.187	-344.063
0.00605	188.791	-343.853
0.0061	191.384	-341.112
0.00615	197.056	-341.176
0.0062	197.444	-342.256
0.00625	200.443	-340.841
0.0063	193.806	-346.04
0.00635	190.101	-343.559
0.0064	191.859	-337.794
0.00645	192.376	-344.85
0.0065	191.404	-341.084
0.00655	184.221	-346.241
0.0066	193.479	-337.779
0.00665	189.859	-339.728
0.0067	194.344	-340.776
0.00675	203.588	-343.901
0.0068	203.205	-342.622
0.00685	191.98	-341.07
0.0069	203.227	-341.227
0.00695	197.97	-344.96
0.007	189.425	-345.149
0.00705	182.624	-344.778
0.0071	196.76	-343.82
0.00715	190.51	-343.566
0.0072	200.64	-346.813
0.00725	202.453	-339.208
0.0073	198.791	-344.121
0.00735	197.741	-341.136
0.0074	192.57	-349.68
0.00745	192.418	-342.407
0.0075	203.015	-343.612
0.00755	206.561	-348.193
0.0076	204.319	-345.506
0.00765	202.599	-347.965
0.0077	202.125	-343.666
0.00775	194.772	-346.517
0.0078	194.466	-345.526
0.00785	200.597	-341.775
0.0079	202.233	-343.479
0.00795	205.183	-353.814
0.008	199.107	-348.293
0.00805	199.148	-347.914
0.0081	200.854	-339.859
0.00815	201.57	-344.177
0.0082	204.549	-348.582
0.00825	187.442	-345.177
0.0083	204.499	-350.66
0.00835	207.191	-353.753
0.0084	203.14	-349.9
0.00845	202.121	-342.571
0.0085	203.233	-351.315
0.00855	202.716	-341.022
0.0086	199.603	-343.559
0.00865	196.874	-346.303
0.0087	196.714	-341.57
0.00875	194.863	-340.505
0.0088	193.791	-346.035
0.00885	185.055	-347.592
0.0089	190.006	-343.939
0.00895	179.828	-344.091
0.009	191.73	-347.589
0.00905	198.644	-339.754
0.0091	178.089	-343.077
0.00915	183.225	-342.944
0.0092	182.87	-346.948
0.00925	192.307	-341.628
0.0093	195.092	-347.149
0.00935	196.248	-342.093
0.0094	202.835	-341.217
0.00945	195.651	-339.888
0.0095	201.011	-352.605
0.00955	206.713	-349.219
0.0096	205.477	-354.466
0.00965	199.364	-351.654
0.0097	202.407	-346.192
0.00975	201.143	-344.08
0.0098	199.967	-349.16
0.00985	200.558	-340.84
0.0099	204.64	-341.741
0.00995	197.994	-340.587
0.01	188.792	-343.497
0.01005	185.782	-338.865
0.0101	190.018	-342.052
0.01015	203.707	-347.261
0.0102	199.4	-350.148
0.01025	201.088	-353.8
0.0103	193.413	-343.182
0.01035	201.504	-342.867
0.0104	204.097	-343.219
0.01045	188.148	-344.991
0.0105	189.244	-346.112
0.01055	193.015	-345.745
0.0106	191.196	-342.806
0.01065	193.03	-343.785
0.0107	188.85	-341.582
0.01075	193.42	-343.952
0.0108	200.262	-348.441
0.01085	204.812	-348.124
0.0109	203.239	-345.611
0.01095	193.763	-342.346
0.011	202.343	-344.914
0.01105	205.025	-346.863
0.0111	204.19	-341.771
0.01115	207.15	-342.079
0.0112	204.269	-344.502
0.01125	204.233	-352.287
0.0113	193.788	-347.093
0.01135	193.258	-345.471
0.0114	194.48	-342.843
0.01145	194.821	-341.825
0.0115	193.364	-343.536
0.01155	182.671	-339.691
0.0116	187.29	-339.887
0.01165	201.164	-343.307
0.0117	201.612	-345.899
0.01175	203.314	-341.415
0.0118	206.461	-341.241
0.01185	200.402	-341.714
0.0119	198.918	-345.193
0.01195	198.691	-348.236
0.012	207.082	-352.093
0.01205	203.989	-348.962
0.0121	204.573	-342.451
0.01215	199.835	-345.327
0.0122	198.478	-346.613
0.01225	188.615	-343.125
0.0123	202.486	-343.203
0.01235	207.755	-345.732
0.0124	199.343	-341.392
0.01245	198.353	-338.123
0.0125	199.674	-344.46
0.01255	201.001	-353.968
0.0126	196.777	-351.131
0.01265	199.768	-346.928
0.0127	188.263	-342.263
0.01275	188.73	-340.732
0.0128	193.981	-340.667
0.01285	202.5	-338.82
0.0129	205.79	-338.99
0.01295	199.149	-343.106
0.013	202.82	-341.92
0.01305	204.28	-351.607
0.0131	202.578	-348.03
0.01315	206.662	-351.733
0.0132	213.262	-350.205
0.01325	208.952	-349.816
0.0133	210.681	-351.072
0.01335	205.804	-346.721
0.0134	202.798	-349.467
0.01345	200.873	-344.301
0.0135	199.361	-344.841
0.01355	202.25	-339.077
0.0136	202.721	-340.979
0.01365	207.595	-341.115
0.0137	198.288	-347.124
0.01375	200.507	-340.375
0.0138	186.798	-345.705
0.01385	193.273	-343.936
0.0139	200.661	-338.977
0.01395	192.403	-343.117
0.014	198.974	-346.239
0.01405	206.428	-342.357
0.0141	207.678	-348.268
0.01415	208.513	-344.254
0.0142	196.917	-340.02
0.01425	203.245	-343.756
0.0143	201.29	-340.472
0.01435	197.2	-338.347
0.0144	192.47	-341.296
0.01445	200.802	-340.483
0.0145	205.286	-349.08
0.01455	197.72	-338.296
0.0146	193.016	-345.33
0.01465	202.221	-341.913
0.0147	198.342	-348.133
0.01475	194.489	-343.126
0.0148	195.797	-346.778
0.01485	193.519	-343.915
0.0149	201.194	-338.188
0.01495	191.77	-342.745
0.015	188.975	-346.221
0.01505	189.132	-340.111
0.0151	194.392	-342.132
0.01515	202.307	-336.729
0.0152	197.354	-339.218
0.01525	195.524	-338.847
0.0153	195.644	-339.317
0.01535	204.665	-341.468
0.0154	201.673	-336.71
0.01545	205.194	-339.385
0.0155	202.58	-341.154
0.01555	197.59	-338.443
0.0156	209.26	-348.131
0.01565	208.236	-341.608
0.0157	205.725	-343.575
0.01575	201.197	-346.838
0.0158	206.559	-347.787
0.01585	198.894	-351.397
0.0159	206.959	-351.587
0.01595	207.513	-347.813
0.016	203.659	-342.261
0.01605	200.773	-343.141
0.0161	201.2	-341.265
0.01615	197.464	-342.489
0.0162	202.712	-333.665
0.01625	191.045	-341.836
0.0163	191.648	-341.009
0.01635	202.757	-335.906
0.0164	190.153	-336.587
0.01645	191.368	-339.848
0.0165	196.902	-337.265
0.01655	193.935	-339.239
0.0166	179.682	-338.395
0.01665	183.932	-343.499
0.0167	175.211	-343.722
0.01675	185.49	-344.686
0.0168	189.342	-340.299
0.01685	189.823	-341.041
0.0169	183.441	-344.353
0.01695	194.152	-346.674
0.017	194.301	-347.315
0.01705	203.017	-346.656
0.0171	198.03	-342.474
0.01715	201.379	-337.722
0.0172	204.072	-344.002
0.01725	202.749	-347.937
0.0173	196.608	-338.344
0.01735	198.89	-344.512
0.0174	191.275	-346.328
0.01745	193.845	-340.98
0.0175	197.983	-340.661
0.01755	194.044	-341.084
0.0176	197.291	-338.562
0.01765	197.872	-342.03
0.0177	199.731	-346.003
0.01775	204.813	-349.851
0.0178	197.277	-345.546
0.01785	188.117	-342.208
0.0179	201.639	-338.499
0.01795	190.623	-343.821
0.018	203.115	-340.904
0.01805	203.3	-350.079
0.0181	201.806	-351.934
0.01815	200.906	-352.191
0.0182	196.12	-353.011
0.01825	208.518	-355.325
0.0183	199.702	-344.973
0.01835	208.022	-347.344
0.0184	204.753	-346.484
0.01845	207.406	-350.013
0.0185	206.722	-348.584
0.01855	201.226	-343.258
0.0186	208.741	-346.995
0.01865	204.143	-340.327
0.0187	202.356	-344.792
0.01875	194.595	-343.018
0.0188	192.604	-338.33
0.01885	193.202	-339.825
0.0189	184.278	-344.522
0.01895	198.154	-341.883
0.019	200.19	-345.709
0.01905	199.387	-341.581
0.0191	200.807	-349.069
0.01915	189.903	-342.149
0.0192	189.813	-343.5
0.01925	182.589	-347.005
0.0193	195.808	-338.617
0.01935	199.657	-341.411
0.0194	197.183	-343.3
0.01945	195.002	-344.934
0.0195	199.101	-345.996
0.01955	204.554	-348.6
0.0196	195.2	-344.179
0.01965	198.372	-344.696
0.0197	189.123	-344.927
0.01975	188.548	-341.257
0.0198	189.754	-338.51
0.01985	199.431	-339.473
0.0199	192.061	-339.89
0.01995	195.416	-340.586
0.02	194.96	-341.092
0.02005	199.678	-338.286
0.0201	191.518	-342.937
0.02015	194.852	-341.904
0.0202	183.503	-341.835
0.02025	196.666	-341.95
0.0203	189.306	-341.523
0.02035	190.524	-343.305
0.0204	195.134	-343.288
0.02045	204.665	-343.031
0.0205	195.212	-342.29
0.02055	198.592	-342.525
0.0206	196.571	-348.615
0.02065	194.57	-348.426
0.0207	196.249	-342.331
0.02075	190.989	-346.835
0.0208	197.187	-342.264
0.02085	194.308	-337.694
0.0209	199.372	-338.789
0.02095	194.187	-343.967
0.021	202.585	-342.347
0.02105	187.508	-344.825
0.0211	205.58	-341.915
0.02115	198.017	-342.825
0.0212	200.214	-347.041
0.02125	201.416	-342.955
0.0213	201.094	-341.156
0.02135	193.527	-344.879
0.0214	205.316	-340.723
0.02145	207.476	-338.417
0.0215	202.184	-343.484
0.02155	206.323	-341.259
0.0216	203.951	-350.717
0.02165	196.316	-343.357
0.0217	198.807	-348.151
0.02175	196.836	-349.018
0.0218	203.67	-350.483
0.02185	202.49	-346.602
0.0219	203.735	-344.851
0.02195	200.824	-348.574
0.022	199.593	-353.723
0.02205	200.475	-350.606
0.0221	197.967	-350.964
0.02215	199.403	-341.003
0.0222	205.744	-342.047
0.02225	200.444	-339.242
0.0223	198.794	-347.704
0.02235	200.122	-349.319
0.0224	199.821	-345.448
0.02245	201.553	-339.08
0.0225	184.177	-345.003
0.02255	188.566	-343.588
0.0226	199.746	-341.791
0.02265	202.276	-339.911
0.0227	200.825	-341.229
0.02275	194.271	-339.944
0.0228	185.02	-342.773
0.02285	188.904	-342.868
0.0229	186.923	-340.153
0.02295	192.723	-343.14
0.023	195.592	-341.632
0.02305	200.676	-343.173
0.0231	199.031	-343.517
0.02315	199.936	-339.195
0.0232	200.547	-341.686
0.02325	188.333	-344.519
0.0233	184.703	-343.115
0.02335	189.422	-339.838
0.0234	195.625	-341.188
0.02345	203.571	-339.298
0.0235	200.936	-348.209
0.02355	200.564	-344.929
0.0236	201.237	-343.608
0.02365	197.081	-344.917
0.0237	194.684	-343.171
0.02375	191.126	-342.805
0.0238	194.959	-346.763
0.02385	193.246	-342.278
0.0239	184.895	-337.232
0.02395	187.32	-339.138
0.024	205.976	-350.171
0.02405	203.81	-352.391
0.0241	200.281	-353.132
0.02415	201.545	-350.742
0.0242	203.034	-345.16
0.02425	202.128	-350.642
0.0243	204.128	-341.432
0.02435	209.199	-344.878
0.0244	206.184	-339.605
0.02445	193.909	-342.147
0.0245	198.617	-338.179
0.02455	200.855	-340.066
0.0246	194.062	-349.259
0.02465	201.34	-346.144
0.0247	203.166	-337.594
0.02475	204.505	-342.482
0.0248	202.897	-351.35
0.02485	200.551	-347.109
0.0249	192.42	-343.983
0.02495	192.052	-339.246
0.025	183.512	-339.108
0.02505	192.158	-341.705
0.0251	199.08	-338.524
0.02515	205.99	-341.143
0.0252	197.454	-344.016
0.02525	208.58	-351.539
0.0253	199.917	-347.163
0.02535	198.029	-351.829
0.0254	196.673	-346.914
0.02545	204.653	-352.899
0.0255	202.347	-344.683
0.02555	205.164	-343.094
0.0256	199.254	-349.1
0.02565	197.414	-340.111
0.0257	205.061	-346.144
0.02575	204.803	-348.454
0.0258	204.105	-344.451
0.02585	195.881	-341.488
0.0259	204.646	-340.917
0.02595	203.09	-337.774
0.026	191.134	-341.281
0.02605	187.482	-346.807
0.0261	186.085	-346.339
0.02615	186.357	-347.278
0.0262	196.838	-346.458
0.02625	194.663	-344.347
0.0263	194.61	-339.892
0.02635	186.143	-340.483
0.0264	196.271	-334.414
0.02645	193.77	-343.723
0.0265	191.736	-342.064
0.02655	192.867	-345.67
0.0266	196.001	-342.807
0.02665	198.675	-347.057
0.0267	201.398	-347.779
0.02675	196.385	-346.187
0.0268	194.346	-348.061
0.02685	202.48	-350.916
0.0269	200.231	-352.216
0.02695	185.957	-346.69
0.027	213.8	-353.438
0.02705	204.946	-351.073
0.0271	199.27	-350.391
0.02715	209.043	-355.505
0.0272	186.816	-342.567
0.02725	190.884	-347.088
0.0273	189.772	-338.139
0.02735	190.918	-343.845
0.0274	207.695	-351.622
0.02745	201.262	-342.695
0.0275	205.285	-338.817
0.02755	193.197	-347.163
0.0276	201.634	-348.086
0.02765	205.833	-344.797
0.0277	199.53	-350.135
0.02775	203.394	-348.258
0.0278	192.521	-346.5
0.02785	191.636	-343.173
0.0279	196.589	-347.52
0.02795	195.45	-346.756
0.028	196.395	-338.018
0.02805	193.994	-346.872
0.0281	194.715	-339.791
0.02815	195.601	-345.742
0.0282	195.798	-342.452
0.02825	204.096	-335.647
0.0283	198.998	-344.163
0.02835	204.281	-338.991
0.0284	207.207	-349.32
0.02845	194.231	-349.532
0.0285	185.489	-342.649
0.02855	199.341	-342.776
0.0286	196.047	-342.592
0.02865	201.142	-347.249
0.0287	201.833	-340.857
0.02875	191.707	-342.763
0.0288	203.705	-343.487
0.02885	193.766	-345.03
0.0289	202.897	-343.273
0.02895	200.748	-343.608
0.029	197.425	-345.34
0.02905	200.44	-349.41
0.0291	206.137	-350.356
0.02915	199.334	-339.562
0.0292	205.482	-338.655
0.02925	198.992	-343.701
0.0293	199.244	-338.653
0.02935	199.9	-345.966
0.0294	196.469	-343.055
0.02945	193.531	-347.475
0.0295	212.75	-351.208
0.02955	205.223	-350.064
0.0296	198.373	-347.854
0.02965	201.665	-349.213
0.0297	200.034	-348.126
0.02975	204.353	-349.991
0.0298	201.905	-345.484
0.02985	200.437	-341.029
0.0299	185.496	-337.551
0.02995	192.343	-343.76
0.03	193.167	-338.826
0.03005	191.731	-338.44
0.0301	195.149	-345.483
0.03015	202.391	-345.182
0.0302	205.202	-347.22
0.03025	208.531	-340.96
0.0303	204.617	-339.118
0.03035	196.708	-341.871
0.0304	203.684	-339.622
0.03045	197.346	-338.273
0.0305	202.42	-347.131
0.03055	208.116	-344.404
0.0306	194.717	-346.245
0.03065	198.142	-350.796
0.0307	207.382	-349.461
0.03075	207.978	-350.419
0.0308	200.475	-350.341
0.03085	196.642	-346.957
0.0309	186.636	-339.517
0.03095	184.397	-346.015
0.031	203.274	-339.701
0.03105	196.367	-342.077
0.0311	206.991	-342.979
0.03115	197.865	-339.411
0.0312	201.632	-337.321
0.03125	191.868	-340.288
0.0313	199.176	-344.843
0.03135	207.817	-340.415
0.0314	188.667	-341.571
0.03145	198.343	-340.681
0.0315	201.492	-341.442
0.03155	201.442	-348.408
0.0316	192.437	-341
0.03165	199.219	-340.482
0.0317	203.425	-342.386
0.03175	202.163	-346.255
0.0318	197.596	-338.084
0.03185	195.705	-337.234
0.0319	194.168	-338.936
0.03195	191.179	-341.423
0.032	191.897	-341.646
0.03205	200.728	-336.632
0.0321	191.132	-346.589
0.03215	198.35	-346.148
0.0322	202.052	-343.535
0.03225	207.728	-343.316
0.0323	200.028	-342.001
0.03235	193.656	-341.582
0.0324	194.999	-339.683
0.03245	201.781	-341.642
0.0325	192.171	-340.503
0.03255	202.554	-347.221
0.0326	205.067	-337.555
0.03265	207.819	-348.948
0.0327	208.512	-349.787
0.03275	207.579	-350.266
0.0328	202.019	-347.395
0.03285	206.748	-348.316
0.0329	205.951	-344.308
0.03295	200.682	-342.361
0.033	198.573	-344.817
0.03305	195.285	-349.079
0.0331	206.931	-342.737
0.03315	203.54	-344.556
0.0332	203.603	-352.298
0.03325	205.477	-349.887
0.0333	200.239	-354.593
0.03335	194.67	-343.824
0.0334	188.597	-345.803
0.03345	183.932	-344.765
0.0335	203.41	-342.097
0.03355	205.82	-341.026
0.0336	188.526	-340.729
0.03365	184.57	-343.562
0.0337	184.981	-346.628
0.03375	196.218	-346.965
0.0338	196.978	-339.941
0.03385	199.76	-349.637
0.0339	208.829	-351.644
0.03395	202.477	-347.252
0.034	200.486	-341.252
0.03405	202.314	-339.283
0.0341	199.943	-344.623
0.03415	193.687	-344.59
0.0342	201.441	-341.744
0.03425	199.804	-342.968
0.0343	202.723	-343.933
0.03435	204.552	-341.893
0.0344	199.82	-342.843
0.03445	196.479	-344.878
0.0345	194.283	-342.67
0.03455	189.614	-343.294
0.0346	202.285	-342.553
0.03465	201.451	-348.894
0.0347	205.935	-348.14
0.03475	208.095	-342.52
0.0348	205.699	-344.999
0.03485	196.596	-342.801
0.0349	192.929	-340.091
0.03495	203.118	-343.965
0.035	206.684	-344.892
0.03505	201.371	-341.314
0.0351	208.111	-350.274
0.03515	202.847	-340.149
0.0352	200.186	-339.159
0.03525	193.222	-339.891
0.0353	204.87	-341.412
0.03535	203.255	-342.602
0.0354	203.943	-336.954
0.03545	201.269	-338.593
0.0355	202.1	-339.698
0.03555	203.495	-351.225
0.0356	208.21	-346.455
0.03565	213.182	-348.694
0.0357	209.139	-348.101
0.03575	210.798	-352.393
0.0358	205.244	-350.376
0.03585	212.791	-346.598
0.0359	205.273	-347.572
0.03595	202.439	-340.978
0.036	208.079	-345.409
0.03605	205.733	-340.143
0.0361	204.421	-340.338
0.03615	203.641	-339.11
0.0362	198.954	-335.956
0.03625	208.069	-338.33
0.0363	204.455	-339.103
0.03635	205.409	-345.43
0.0364	210.362	-342.112
0.03645	196.899	-341.53
0.0365	200.888	-336.425
0.03655	206.47	-336.825
0.0366	200.023	-342.272
0.03665	192.49	-342.067
0.0367	195.53	-344.291
0.03675	198.389	-338.562
0.0368	204.592	-341.952
0.03685	217.84	-348.121
0.0369	203.574	-348.476
0.03695	203.592	-338.485
0.037	201.403	-343.538
0.03705	198.43	-340.571
0.0371	196.27	-343.781
0.03715	196.43	-344.399
0.0372	199.724	-335.82
0.03725	198.771	-342.396
0.0373	204.315	-338.924
0.03735	200.516	-338.891
0.0374	207.8	-345.201
0.03745	210.608	-347.176
0.0375	205.142	-344.879
0.03755	215.329	-350.958
0.0376	207.833	-342.853
0.03765	191.297	-344.657
0.0377	204.999	-336.66
0.03775	202.566	-339.458
0.0378	196.885	-343.37
0.03785	200.98	-343.951
0.0379	201.283	-341.35
0.03795	207.166	-344.613
0.038	207.48	-341.876
0.03805	203.831	-339.942
0.0381	203.412	-349.049
0.03815	191.941	-338.669
0.0382	200.007	-339.051
0.03825	209.29	-346.809
0.0383	205.242	-348.865
0.03835	192.715	-347.346
0.0384	194.028	-344.417
0.03845	194.255	-347.719
0.0385	200.369	-343.832
0.03855	206.333	-350.611
0.0386	206.02	-346.619
0.03865	203.384	-346.945
0.0387	201.281	-342.282
0.03875	201.836	-344.063
0.0388	205.046	-346.361
0.03885	201.465	-342.506
0.0389	202.221	-345.878
0.03895	194.356	-344.128
0.039	204.579	-346.212
0.03905	201.247	-338.73
0.0391	202.582	-345.146
0.03915	200.305	-343.754
0.0392	199.535	-343.203
0.03925	205.932	-348.459
0.0393	197.153	-345.954
0.03935	195.539	-341.392
0.0394	196.53	-340.259
0.03945	201.726	-342.781
0.0395	202.295	-341.487
0.03955	201.401	-338.343
0.0396	190.847	-341.515
0.03965	195.813	-351.243
0.0397	195.346	-349.161
0.03975	201.67	-339.756
0.0398	207.758	-349.538
0.03985	201.586	-346.122
0.0399	201.363	-341.683
0.03995	204.177	-342.653
0.04	208.745	-336.358
0.04005	207.93	-342.794
0.0401	205.556	-345.974
0.04015	208.425	-346.045
0.0402	206.53	-346.359
0.04025	201.492	-340.59
0.0403	205.88	-342.232
0.04035	213.316	-343.159
0.0404	201.798	-345.557
0.04045	202.238	-342.856
0.0405	195.113	-345.515
0.04055	198.225	-347.39
0.0406	193.711	-343.036
0.04065	195.138	-344.737
0.0407	195.983	-344.231
0.04075	195.006	-344.745
0.0408	192.155	-344.528
0.04085	196.423	-349.71
0.0409	205.699	-349.515
0.04095	199.55	-349.384
0.041	205.257	-348.787
0.04105	206.604	-349.136
0.0411	193.001	-345.569
0.04115	194.019	-337.955
0.0412	194.208	-343.704
0.04125	198.301	-339.295
0.0413	196.572	-345.692
0.04135	206.086	-347.774
0.0414	208.946	-351.222
0.04145	211.859	-346.777
0.0415	205.901	-345.484
0.04155	207.991	-339.731
0.0416	209.925	-347.081
0.04165	208.828	-345.699
0.0417	210.27	-352.001
0.04175	204.028	-345.523
0.0418	204.816	-341.222
0.04185	195.099	-350.583
0.0419	196.608	-343.112
0.04195	206.181	-351.304
0.042	211.896	-345.976
0.04205	204.104	-340.141
0.0421	201.511	-339.694
0.04215	202.764	-341.032
0.0422	200.168	-344.206
0.04225	192.072	-343.274
0.0423	202.436	-339.54
0.04235	196.68	-344.137
0.0424	190.517	-343.28
0.04245	190.863	-342.978
0.0425	205.872	-335.519
0.04255	199.805	-344.016
0.0426	199.252	-341.804
0.04265	202.614	-339.822
0.0427	200.036	-340.475
0.04275	202.882	-343.392
0.0428	201.963	-340.394
0.04285	196.523	-347.633
0.0429	194.184	-342.923
0.04295	201.348	-341.769
0.043	204.159	-342.896
0.04305	197.294	-344.112
0.0431	207.225	-343.05
0.04315	205.175	-341.773
0.0432	207.532	-349.021
0.04325	211.41	-340.684
0.0433	204.832	-339.486
0.04335	204.369	-338.782
0.0434	206.016	-339.406
0.04345	204.411	-341.335
0.0435	196.312	-341.298
0.04355	201.851	-342.391
0.0436	200.99	-342.588
0.04365	197.587	-341.858
0.0437	202.079	-335.634
0.04375	206.518	-337.355
0.0438	201.202	-340.102
0.04385	205.091	-339.987
0.0439	206.245	-341.372
0.04395	191.447	-340.646
0.044	193.239	-334.729
0.04405	197.661	-335.752
0.0441	200.627	-337.374
0.04415	197.365	-341.017
0.0442	195.359	-340.308
0.04425	183.158	-339.446
0.0443	204.761	-340.3
0.04435	200.345	-340.139
0.0444	204.258	-339.154
0.04445	201.305	-343.223
0.0445	198.124	-344.87
0.04455	208.605	-347.548
0.0446	204.711	-348.891
0.04465	206.487	-339.476
0.0447	199.807	-340.836
0.04475	203.481	-343.079
0.0448	199.597	-345.302
0.04485	190.387	-345.751
0.0449	193.736	-340.703
0.04495	196.401	-339.427
0.045	200.607	-343.359
0.04505	203.267	-338.185
0.0451	199.643	-339.523
0.04515	206.616	-350.25
0.0452	207.5	-345.937
0.04525	206.391	-345.274
0.0453	202.366	-347.793
0.04535	203.757	-347.49
0.0454	199.842	-347.46
0.04545	208.814	-351.067
0.0455	196.218	-342.02
0.04555	195.753	-344.087
0.0456	200.577	-350.799
0.04565	201.683	-341.244
0.0457	204.445	-345.304
0.04575	190.878	-336.395
0.0458	205.741	-333.534
0.04585	195.744	-335.77
0.0459	199.954	-337.177
0.04595	194.816	-345.465
0.046	206.756	-341.225
0.04605	199.498	-340.659
0.0461	202.071	-342.597
0.04615	198.204	-348.199
0.0462	193.1	-343.168
0.04625	200.397	-345.042
0.0463	197.289	-342.133
0.04635	204.78	-342.414
0.0464	202.924	-348.244
0.04645	202.053	-345.692
0.0465	201.585	-338.614
0.04655	199.356	-340.077
0.0466	201.276	-337.93
0.04665	201.224	-338.347
0.0467	204.107	-337.125
0.04675	200.322	-340.53
0.0468	194.928	-339.563
0.04685	201.547	-344.848
0.0469	194.594	-344.913
0.04695	204.46	-349.127
0.047	202.21	-341.815
0.04705	200.74	-342.369
0.0471	204.986	-348.883
0.04715	207.441	-344.708
0.0472	195.929	-336.635
0.04725	205.483	-345.797
0.0473	199.87	-346.057
0.04735	203.192	-349.708
0.0474	202.466	-343.459
0.04745	202.932	-346.098
0.0475	200.707	-347.532
0.04755	188.68	-340.805
0.0476	190.695	-339.361
0.04765	188.187	-345.73
0.0477	206.162	-341.68
0.04775	203.495	-342.534
0.0478	196.111	-344.43
0.04785	192.314	-342.659
0.0479	197.414	-341.5
0.04795	199.138	-340.218
0.048	200.07	-340.988
0.04805	199.309	-337.183
0.0481	200.089	-345.916
0.04815	204.157	-343.091
0.0482	204.376	-352.455
0.04825	195.528	-345.056
0.0483	206.807	-351.709
0.04835	202.831	-345.49
0.0484	189.579	-339.932
0.04845	191.048	-343.053
0.0485	194.876	-344.36
0.04855	202.985	-339.68
0.0486	199.32	-342.963
0.04865	203.452	-340.707
0.0487	195.513	-342.527
0.04875	199.721	-340.3
0.0488	193.108	-344.643
0.04885	197.929	-343.725
0.0489	208.729	-344.723
0.04895	203.437	-345.93
0.049	194.672	-345.363
0.04905	195.175	-335.405
0.0491	198.353	-338.77
0.04915	201.687	-338.826
0.0492	199.203	-342.94
0.04925	192.9	-338.731
0.0493	194.542	-339.695
0.04935	190.266	-341.722
0.0494	192.228	-342.771
0.04945	202.434	-340.407
0.0495	194.638	-338.232
0.04955	195.812	-338.309
0.0496	192.263	-342.005
0.04965	199.97	-342.476
0.0497	197.308	-347.101
0.04975	202.049	-345.008
0.0498	196.497	-340.982
0.04985	197.739	-348.339
0.0499	198.779	-339.601
0.04995	201.927	-341.117
0.05	205.244	-337.079
0.05005	195.085	-342.251
0.0501	200.132	-344.254
0.05015	199.221	-343.62
0.0502	198.889	-346.414
0.05025	203.914	-345.772
0.0503	200.925	-344.83
0.05035	213.193	-350.128
0.0504	208.461	-339.838
0.05045	201.784	-342.515
0.0505	202.692	-342.26
0.05055	201.606	-341.049
0.0506	202.541	-340.996
0.05065	198.566	-341.33
0.0507	205.592	-348.982
0.05075	212.223	-349.42
0.0508	198.108	-348.115
0.05085	202.085	-339.867
0.0509	197.589	-338.096
0.05095	196.447	-344.225
0.051	199.528	-340.264
0.05105	198.436	-338.534
0.0511	196.253	-341.95
0.05115	195.304	-341.479
0.0512	194.037	-340.117
0.05125	208.044	-336.585
0.0513	205.585	-339.637
0.05135	202.1	-337.469
0.0514	203.988	-338.42
0.05145	209.626	-341.196
0.0515	206.209	-346.769
0.05155	206.442	-342.386
0.0516	200.862	-344.703
0.05165	188.193	-343.325
0.0517	197.485	-338.666
0.05175	199.867	-350.379
0.0518	201.186	-349.962
0.05185	202.772	-348.344
0.0519	195.721	-336.899
0.05195	198.775	-339.93
0.052	201.615	-343.429
0.05205	200.973	-339.308
0.0521	200.304	-338.442
0.05215	202.613	-337.793
0.0522	199.157	-340.162
0.05225	201.918	-341.448
0.0523	204.586	-344.758
0.05235	197.561	-343.781
0.0524	207.147	-338.393
0.05245	205.406	-345.905
0.0525	211.841	-341.165
0.05255	212.293	-338.691
0.0526	214.853	-342.322
0.05265	207.156	-341.669
0.0527	214.048	-345.306
0.05275	210.985	-348.911
0.0528	204.893	-349.84
0.05285	207.995	-345.055
0.0529	201.149	-339.491
0.05295	204.405	-342.572
0.053	201.498	-340.491
0.05305	204.341	-345.874
0.0531	197.282	-344.551
0.05315	201.021	-338.981
0.0532	188.887	-341.045
0.05325	197.629	-337.604
0.0533	188.127	-344.227
0.05335	190.446	-339.451
0.0534	193.214	-340.286
0.05345	198.474	-343.696
0.0535	199.47	-344.642
0.05355	199.38	-344.275
0.0536	203.871	-343.521
0.05365	208.867	-347.92
0.0537	206.899	-345.472
0.05375	207.174	-349.878
0.0538	209.17	-349.62
0.05385	203.51	-349.247
0.0539	204.017	-348.595
0.05395	205.774	-338.63
0.054	203.647	-339.349
0.05405	204.428	-339.03
0.0541	193.083	-338.789
0.05415	183.135	-344.413
0.0542	194.143	-339.66
0.05425	196.457	-341.315
0.0543	199.456	-345.453
0.05435	199.57	-345.882
0.0544	193.332	-341.36
0.05445	194.1	-340.657
0.0545	190.469	-342.154
0.05455	186.147	-343.653
0.0546	199.355	-342.829
0.05465	199.227	-340.995
0.0547	197.16	-341.695
0.05475	195.161	-341.594
0.0548	195.97	-342.308
0.05485	191.791	-343.048
0.0549	194.087	-344.536
0.05495	202.35	-349.859
0.055	204.791	-351.157
0.05505	202.767	-340.605
0.0551	201.577	-345.788
0.05515	204.205	-340.85
0.0552	199.615	-340.358
0.05525	200.921	-341.724
0.0553	199.282	-345.889
0.05535	211.607	-337.797
0.0554	203.193	-343.869
0.05545	205.862	-338.157
0.0555	197.053	-342.593
0.05555	198.543	-338.527
0.0556	197.656	-338.807
0.05565	194.888	-342.853
0.0557	200.313	-344.131
0.05575	198.565	-345.395
0.0558	201.261	-342.559
0.05585	197.886	-345.388
0.0559	193.294	-340.036
0.05595	200.145	-339.328
0.056	202.543	-345.598
0.05605	199.816	-350.94
0.0561	199.251	-350.607
0.05615	199.969	-351.645
0.0562	199.092	-346.174
0.05625	197.348	-342.335
0.0563	198.564	-337.281
0.05635	201.332	-340.924
0.0564	193.477	-342.008
0.05645	202.569	-340.7
0.0565	192.489	-344.092
0.05655	188.276	-340.521
0.0566	198.326	-343.022
0.05665	201.317	-338.478
0.0567	200.788	-338.009
0.05675	191.82	-342.459
0.0568	209.063	-351.209
0.05685	208.861	-342.791
0.0569	203.764	-346.487
0.05695	201.618	-341.977
0.057	204.679	-348.115
0.05705	206.183	-343.455
0.0571	197.11	-342.695
0.05715	196.175	-341.814
0.0572	199.21	-339.417
0.05725	202.156	-341.332
0.0573	206.088	-349.079
0.05735	204.259	-347.587
0.0574	202.759	-339.489
0.05745	206.459	-340.381
0.0575	198.276	-337.576
0.05755	201.066	-337.694
0.0576	208.539	-349.426
0.05765	201.709	-344.135
0.0577	207.384	-341.855
0.05775	201.374	-339.603
0.0578	202.541	-341.196
0.05785	202.768	-342.718
0.0579	201.151	-342.95
0.05795	200.309	-338.679
0.058	201.48	-348.744
0.05805	191.599	-339.463
0.0581	187.074	-341.37
0.05815	191.258	-340.002
0.0582	188.301	-339.446
0.05825	190.477	-341.789
0.0583	180.168	-342.313
0.05835	193.089	-343.845
0.0584	201.129	-342.116
0.05845	201.117	-350.26
0.0585	207.403	-341.882
0.05855	197.942	-340.018
0.0586	196.72	-340.451
0.05865	202.489	-337.948
0.0587	196.905	-343.479
0.05875	204.511	-338.486
0.0588	206.209	-351.076
0.05885	207.038	-341.904
0.0589	209.156	-342.924
0.05895	202.111	-341.053
0.059	203.109	-336.9
0.05905	197.378	-346.398
0.0591	199.702	-347.051
0.05915	201.893	-341.035
0.0592	194.597	-342.247
0.05925	196.791	-343.139
0.0593	188.277	-335.871
0.05935	209.025	-334.948
0.0594	183.109	-340.335
0.05945	194.194	-340.005
0.0595	186.776	-345.926
0.05955	193.227	-349.629
0.0596	191.19	-345.351
0.05965	188.392	-339.28
0.0597	190.929	-335.7
0.05975	194.821	-341.889
0.0598	194.314	-340.737
0.05985	188.249	-341.847
0.0599	195.593	-339.864
0.05995	202.907	-349.165
0.06	194.483	-336.973
0.06005	196.399	-342.967
0.0601	198.016	-342.557
0.06015	193.939	-341.848
0.0602	198.011	-347.974
0.06025	201.741	-345.809
0.0603	200.66	-340.992
0.06035	191.662	-340.115
0.0604	194.952	-342.768
0.06045	201.877	-346.282
0.0605	201.59	-343.601
0.06055	195.55	-341.759
0.0606	205.041	-346.993
0.06065	206.018	-348.673
0.0607	195.551	-342.152
0.06075	191.029	-344.214
0.0608	208.11	-341.271
0.06085	204.75	-346.845
0.0609	201.706	-347.126
0.06095	189.731	-342.196
0.061	181.718	-343.55
0.06105	192.296	-346.242
0.0611	187.952	-341.256
0.06115	191.266	-335.536
0.0612	196.746	-343.542
0.06125	203.031	-341.009
0.0613	209.883	-350.459
0.06135	202.871	-346.819
0.0614	199.874	-342.909
0.06145	196.406	-338.6
0.0615	202.229	-344.621
0.06155	210.999	-345.591
0.0616	206.268	-340.478
0.06165	203.512	-347.352
0.0617	203.51	-344.482
0.06175	202.076	-344.761
0.0618	203.942	-348.813
0.06185	209.144	-347.715
0.0619	208.037	-349.102
0.06195	207.049	-343.786
0.062	201.36	-339.65
0.06205	204.825	-344.498
0.0621	205.639	-347.917
0.06215	204.982	-346.129
0.0622	203.643	-338.241
0.06225	190.966	-337.084
0.0623	190.137	-343.52
0.06235	199.384	-342.265
0.0624	198.494	-335.338
0.06245	202.399	-342.269
0.0625	193.62	-344.152
0.06255	202.876	-349.91
0.0626	204.053	-349.659
0.06265	202.064	-351.467
0.0627	201.314	-338.59
0.06275	204.88	-339.338
0.0628	201.745	-344.37
0.06285	205.33	-339.352
0.0629	199.857	-341.67
0.06295	192.151	-343.976
0.063	193.063	-342.81
0.06305	197.397	-342.868
0.0631	192.952	-345.913
0.06315	190.754	-341.261
0.0632	202.215	-338.464
0.06325	195.477	-341.45
0.0633	186.993	-339.2
0.06335	198.674	-341.107
0.0634	201.549	-336.376
0.06345	198.562	-343.092
0.0635	202.527	-342.476
0.06355	198.719	-340.615
0.0636	205.429	-343.327
0.06365	204.409	-339.783
0.0637	201.445	-338.971
0.06375	197.812	-343.815
0.0638	206.619	-342.253
0.06385	206.397	-343.008
0.0639	209.423	-340.88
0.06395	200.692	-343.379
0.064	197.453	-342.908
0.06405	201.767	-338.481
0.0641	204.472	-345.332
0.06415	202.41	-347.348
0.0642	199.229	-340.771
0.06425	201.08	-347.315
0.0643	199.348	-341.407
0.06435	206.131	-346.746
0.0644	193.908	-337.854
0.06445	194.417	-337.885
0.0645	197.543	-342.346
0.06455	194.592	-344.048
0.0646	201.952	-342.963
0.06465	200.718	-340.297
0.0647	204.098	-339.195
0.06475	196.226	-345.915
0.0648	210.672	-343.77
0.06485	210.577	-351.078
0.0649	208.089	-353.127
0.06495	195.711	-342.778
0.065	195.456	-344.479
0.06505	187.485	-343.921
0.0651	203.767	-338.04
0.06515	204.373	-337.393
0.0652	201.716	-343.196
0.06525	205.422	-346.941
0.0653	206.203	-347.84
0.06535	206.181	-351.336
0.0654	203.501	-342.399
0.06545	198.55	-340.27
0.0655	195.214	-342.276
0.06555	201.355	-341.013
0.0656	197.1	-347.142
0.06565	194.492	-349.053
0.0657	197.501	-339.87
0.06575	186.01	-342.592
0.0658	180.843	-341.756
0.06585	195.967	-340.944
0.0659	193.561	-340.2
0.06595	201.176	-341.123
0.066	204.191	-339.592
0.06605	199.761	-344.913
0.0661	203.325	-341.234
0.06615	202.491	-336.392
0.0662	204.322	-339.966
0.06625	204.642	-340.728
0.0663	200.974	-342.643
0.06635	211.117	-339.169
0.0664	212.924	-347.792
0.06645	208.14	-345.792
0.0665	201.004	-340.14
0.06655	208.094	-345.938
0.0666	204.655	-352.619
0.06665	203.789	-351.031
0.0667	201.73	-339.682
0.06675	197.351	-342.171
0.0668	189.327	-343.422
0.06685	196.754	-343.043
0.0669	195.615	-339.322
0.06695	205.333	-351.969
0.067	198.183	-340.659
0.06705	195.068	-335.847
0.0671	198.073	-338.125
0.06715	191.211	-347.407
0.0672	201.411	-344.887
0.06725	196.318	-349.421
0.0673	193.851	-345.595
0.06735	204.101	-336.408
0.0674	199.173	-339.483
0.06745	203.939	-336.907
0.0675	201.797	-342.185
0.06755	201.751	-336.364
0.0676	203.081	-338.473
0.06765	196.978	-340.981
0.0677	194.763	-339.624
0.06775	197.741	-341.466
0.0678	202.661	-338.049
0.06785	199.593	-341.296
0.0679	207.524	-349.633
0.06795	193.404	-346.405
0.068	192.497	-340.138
0.06805	194.546	-339.179
0.0681	210.604	-346.302
0.06815	204.099	-349.042
0.0682	194.468	-342.22
0.06825	195.952	-340.444
0.0683	205.279	-349.879
0.06835	196.933	-350.97
0.0684	197.019	-343.988
0.06845	207.072	-347.059
0.0685	202.516	-348.353
0.06855	203.975	-345.743
0.0686	194.814	-342.645
0.06865	207.877	-344.965
0.0687	206.601	-342.192
0.06875	199.196	-338.559
0.0688	196.557	-342.894
0.06885	199.582	-343.717
0.0689	194.645	-343.172
0.06895	201.929	-338.098
0.069	204.495	-345.711
0.06905	204.454	-344.893
0.0691	202.064	-349.07
0.06915	204.548	-349.818
0.0692	198.342	-350.597
0.06925	187.398	-342.488
0.0693	193.249	-348.154
0.06935	203.376	-346.015
0.0694	195.1	-345.162
0.06945	196.672	-342.433
0.0695	190.759	-346.867
0.06955	205.624	-341.586
0.0696	211.598	-346.974
0.06965	214.873	-349.767
0.0697	208.014	-350.07
0.06975	209.996	-346.905
0.0698	210.902	-340.25
0.06985	204.293	-341.414
0.0699	199.168	-343.064
0.06995	200.252	-342.609
0.07	197.565	-340.078
0.07005	204.964	-342.861
0.0701	207.068	-344.904
0.07015	208.068	-340.105
0.0702	208.437	-342.705
0.07025	207.268	-342.028
0.0703	202.017	-341.758
0.07035	204.74	-349.029
0.0704	204.733	-345.34
0.07045	209.52	-351.591
0.0705	204.357	-345.549
0.07055	197.461	-346.564
0.0706	201.356	-349.744
0.07065	203.514	-348.297
0.0707	199.057	-340.301
0.07075	206.985	-350.487
0.0708	203.74	-342.302
0.07085	186.906	-345.697
0.0709	196.074	-339.239
0.07095	191.699	-341.797
0.071	189.627	-341.939
0.07105	199.41	-344.296
0.0711	202.811	-342.779
0.07115	207.39	-348.583
0.0712	206.92	-349.337
0.07125	207.044	-344.554
0.0713	200.772	-342.557
0.07135	194.391	-345.562
0.0714	197.882	-339.873
0.07145	211.582	-344.462
0.0715	190.269	-343.061
0.07155	196.291	-342.718
0.0716	201.664	-342.106
0.07165	195.014	-342.017
0.0717	203.742	-338.872
0.07175	196.864	-338.516
0.0718	199.705	-339.936
0.07185	204.804	-347.448
0.0719	203.582	-349.535
0.07195	204.472	-347.085
0.072	205.919	-349.356
0.07205	211.192	-350.343
0.0721	207.347	-348.521
0.07215	206.584	-349.717
0.0722	203.236	-344.225
0.07225	196.381	-345.149
0.0723	185.912	-339.08
0.07235	183.576	-343.313
0.0724	189.913	-341.172
0.07245	207.714	-347.297
0.0725	204.883	-342.523
0.07255	206.156	-340.512
0.0726	201.856	-341.126
0.07265	200.679	-339.423
0.0727	207.161	-346.41
0.07275	204.842	-338.581
0.0728	210.397	-341.669
0.07285	210.175	-341.839
0.0729	210.696	-347.981
0.07295	207.181	-347.02
0.073	203.82	-342.259
0.07305	202.589	-338.356
0.0731	201.434	-335.911
0.07315	209.032	-345.375
0.0732	204.185	-338.219
0.07325	194.939	-338.464
0.0733	194.911	-340.14
0.07335	203.143	-336.871
0.0734	205.511	-343.848
0.07345	199.108	-344.016
0.0735	206.517	-341.889
0.07355	203.184	-341.686
0.0736	201.382	-339.941
0.07365	202.003	-338.808
0.0737	206.612	-340.238
0.07375	205.935	-341.415
0.0738	192.641	-343.453
0.07385	199.591	-340.054
0.0739	200.149	-339.919
0.07395	197.843	-342.349
0.074	198.228	-339.972
0.07405	205.555	-339.306
0.0741	205.506	-336.032
0.07415	206.733	-341.408
0.0742	200.679	-344.174
0.07425	206.73	-340.028
0.0743	198.402	-343.751
0.07435	199.628	-345.179
0.0744	201.696	-344.733
0.07445	191.787	-340.442
0.0745	206.839	-349.298
0.07455	206.969	-350.675
0.0746	210.345	-347.651
0.07465	207.322	-347.739
0.0747	205.976	-343.015
0.07475	195.913	-338.164
0.0748	193.213	-340.865
0.07485	194.654	-342.684
0.0749	202.009	-348.045
0.07495	195.86	-337.288
0.075	202.164	-339.028
0.07505	199.972	-342.396
0.0751	206.973	-338.659
0.07515	203.509	-338.371
0.0752	207.195	-339.926
0.07525	204.427	-340.661
0.0753	204.58	-341.7
0.07535	191.4	-348.976
0.0754	188.4	-343.207
0.07545	190.498	-339.975
0.0755	204.69	-339.566
0.07555	196.438	-345.117
0.0756	206.774	-342.473
0.07565	213.669	-346.379
0.0757	208.111	-350.317
0.07575	210.85	-345.71
0.0758	203.624	-344.53
0.07585	207.502	-343.78
0.0759	207.483	-344.756
0.07595	200.251	-344.815
0.076	196.422	-337.977
0.07605	198.52	-337.731
0.0761	201.273	-340.671
0.07615	201.135	-335.94
0.0762	189.297	-341.374
0.07625	193.819	-343.92
0.0763	196.523	-341.056
0.07635	201.77	-338.226
0.0764	198.881	-338.484
0.07645	202.147	-338.325
0.0765	198.793	-340.848
0.07655	200.497	-343.868
0.0766	205.221	-335.395
0.07665	205.074	-341.821
0.0767	208.197	-349.956
0.07675	209.837	-349.386
0.0768	205.894	-347.942
0.07685	204.281	-350.381
0.0769	208.048	-343.495
0.07695	205.832	-339.032
0.077	202.393	-339.818
0.07705	205.445	-340.026
0.0771	203.202	-341.72
0.07715	209.199	-340.842
0.0772	198.559	-342.738
0.07725	211.004	-338.361
0.0773	210.977	-348.53
0.07735	205.264	-345.032
0.0774	201.026	-338.44
0.07745	203.45	-340.62
0.0775	201.867	-343.912
0.07755	206.496	-341.193
0.0776	204.267	-339.07
0.07765	196.738	-340.853
0.0777	196.6	-342.642
0.07775	197.081	-340.902
0.0778	183.016	-336.589
0.07785	193.078	-347.679
0.0779	206.759	-342.893
0.07795	203.437	-338.051
0.078	208.687	-340.084
0.07805	197.306	-346.017
0.0781	208.6	-353.54
0.07815	210.899	-350.831
0.0782	202.321	-342.057
0.07825	199.826	-341.215
0.0783	203.873	-344.706
0.07835	207.431	-346.388
0.0784	204.796	-352.662
0.07845	206.293	-351.566
0.0785	197.618	-352.279
0.07855	193.013	-341.94
0.0786	193.069	-343.542
0.07865	201.775	-338.862
0.0787	193.927	-343.993
0.07875	200.15	-346.374
0.0788	209.134	-349.732
0.07885	201.015	-350.128
0.0789	207.623	-352.743
0.07895	209.56	-344.47
0.079	204.481	-339.179
0.07905	196.089	-341
0.0791	191.86	-342.465
0.07915	205.344	-341.78
0.0792	194.648	-344.073
0.07925	197.769	-340.952
0.0793	202.614	-342.694
0.07935	207.699	-342.9
0.0794	201.669	-342.492
0.07945	196.503	-345.108
0.0795	205.995	-339.173
0.07955	201.664	-338.277
0.0796	191.484	-339.763
0.07965	202.248	-335.47
0.0797	194.819	-337.474
0.07975	198.402	-341.92
0.0798	202.88	-338.362
0.07985	202.785	-339.446
0.0799	200.37	-343.149
0.07995	199.485	-342.096
0.08	190.341	-345.95
0.08005	194.653	-344.341
0.0801	202.779	-340.52
0.08015	207.246	-343.876
0.0802	207.866	-341.124
0.08025	205.607	-343.307
0.0803	202.91	-342.01
0.08035	201.198	-343.834
0.0804	203.019	-337.81
0.08045	202.9	-341.357
0.0805	207.139	-337.012
0.08055	200.135	-342.314
0.0806	196.345	-338.688
0.08065	202.994	-348.112
0.0807	203.04	-342.587
0.08075	196.405	-339.123
0.0808	204.74	-344.766
0.08085	207.566	-349.574
0.0809	207.466	-343.958
0.08095	205.923	-345.805
0.081	204.715	-337.702
0.08105	201.773	-338.634
0.0811	204.988	-337.85
0.08115	205.318	-346.767
0.0812	210.377	-346.738
0.08125	203.109	-339.57
0.0813	200.164	-343.431
0.08135	198.14	-345.851
0.0814	191.11	-344.164
0.08145	196.247	-341.563
0.0815	204.848	-341.337
0.08155	204.467	-339.905
0.0816	207.766	-336.549
0.08165	206.431	-335.089
0.0817	196.978	-341.055
0.08175	204.124	-343.413
0.0818	202.006	-343.276
0.08185	196.41	-337.605
0.0819	196.052	-335.551
0.08195	206.141	-336.698
0.082	190.527	-337.209
0.08205	200.008	-337.635
0.0821	196.859	-340.387
0.08215	198.339	-340.522
0.0822	195.458	-341.449
0.08225	195.104	-344.347
0.0823	198.436	-343.423
0.08235	202.488	-349.629
0.0824	206.52	-346.857
0.08245	208.328	-348.887
0.0825	209.643	-350.099
0.08255	204.881	-346.768
0.0826	201.936	-345.046
0.08265	211.179	-351.984
0.0827	207.488	-352.555
0.08275	208.979	-351.544
0.0828	210.144	-347.237
0.08285	212.883	-353.256
0.0829	197.823	-337.502
0.08295	198.104	-339.566
0.083	197.048	-347.302
0.08305	206.969	-346.44
0.0831	211.204	-345.122
0.08315	207.834	-340.825
0.0832	207.401	-342.901
0.08325	206.061	-341.279
0.0833	202.477	-338.93
0.08335	196.561	-338.334
0.0834	202.137	-342.295
0.08345	199.303	-341.004
0.0835	201.989	-344.03
0.08355	205.064	-337.78
0.0836	215.792	-342.879
0.08365	207.702	-352.73
0.0837	187.955	-340.381
0.08375	194.908	-343.015
0.0838	189.748	-342.379
0.08385	200.728	-344.046
0.0839	202.841	-347.279
0.08395	213.495	-348.092
0.084	193.501	-346.814
0.08405	188.148	-345.874
0.0841	198.492	-338.96
0.08415	201.542	-339.279
0.0842	204.857	-338.443
0.08425	203.831	-341.353
0.0843	194.466	-340.782
0.08435	201.723	-341.983
0.0844	207.691	-335.767
0.08445	202.894	-344.023
0.0845	203.407	-347.923
0.08455	203.336	-341.639
0.0846	198.484	-341.495
0.08465	211.102	-341.343
0.0847	196.202	-344.712
0.08475	199.94	-340.998
0.0848	204.922	-345.032
0.08485	196.742	-340.426
0.0849	197.826	-345.729
0.08495	202.902	-341.453
0.085	203.432	-340.843
0.08505	206.012	-349.481
0.0851	208.643	-344.905
0.08515	208.037	-348.626
0.0852	204.582	-349.901
0.08525	201.925	-343.554
0.0853	208.284	-352.071
0.08535	206.427	-349.654
0.0854	199.444	-338.044
0.08545	201.206	-339.724
0.0855	207.854	-338.269
0.08555	200.668	-339.644
0.0856	198.692	-339.145
0.08565	205.403	-341.623
0.0857	200.145	-338.368
0.08575	198.436	-341.375
0.0858	198.333	-338.663
0.08585	198.869	-338.925
0.0859	198.23	-344.344
0.08595	198.868	-345.576
0.086	199.422	-342.189
0.08605	201.652	-343.955
0.0861	198.362	-341.947
0.08615	194.039	-347.958
0.0862	197.834	-342.231
0.08625	203.227	-347.011
0.0863	190.914	-338.139
0.08635	199.562	-338.505
0.0864	201.861	-342.245
0.08645	205.073	-343.922
0.0865	196.265	-344.629
0.08655	192.795	-342.571
0.0866	194.986	-340.207
0.08665	196.39	-339.761
0.0867	196.615	-343.126
0.08675	196.99	-339.107
0.0868	197.521	-342.819
0.08685	202.582	-336.775
0.0869	190.53	-341.23
0.08695	197.175	-338.106
0.087	199.459	-338.566
0.08705	195.793	-344.741
0.0871	197.192	-340.579
0.08715	202.447	-338.949
0.0872	198.949	-336.575
0.08725	204.087	-337.49
0.0873	197.709	-340.557
0.08735	201.127	-338.531
0.0874	199.473	-337.652
0.08745	196.302	-341.2
0.0875	209.363	-347.277
0.08755	205.128	-352.754
0.0876	203.377	-345.527
0.08765	188.553	-342.834
0.0877	204.721	-343.049
0.08775	200.44	-344.282
0.0878	206.817	-341.052
0.08785	186.009	-346.403
0.0879	195.209	-342.481
0.08795	206.85	-348.334
0.088	201.252	-342.037
0.08805	196.109	-340.518
0.0881	201.142	-340.713
0.08815	189.744	-343.87
0.0882	187.916	-347.085
0.08825	193.644	-338.892
0.0883	203.905	-338.485
0.08835	199.185	-342.012
0.0884	201.874	-347.751
0.08845	202.1	-350.628
0.0885	202.023	-342.532
0.08855	199.378	-347.932
0.0886	207.198	-352.824
0.08865	208.801	-345.311
0.0887	208.822	-343.427
0.08875	202.38	-345.483
0.0888	204.823	-331.981
0.08885	199.91	-340.761
0.0889	204.176	-339.795
0.08895	197.408	-340.572
0.089	189.601	-341.828
0.08905	199.747	-342.187
0.0891	195.728	-342.323
0.08915	197.195	-343.854
0.0892	187.4	-346.277
0.08925	194.972	-341.181
0.0893	193.522	-343.202
0.08935	190.681	-341.485
0.0894	198.005	-338.154
0.08945	204.246	-340.395
0.0895	208.48	-348.504
0.08955	202.255	-343.206
0.0896	198.125	-342.534
0.08965	198.788	-351.394
0.0897	201.368	-343.16
0.08975	197.345	-339.813
0.0898	195.782	-344.553
0.08985	205.652	-334.82
0.0899	203.828	-337.601
0.08995	203.92	-335.697
0.09	204.723	-338.731
0.09005	199.655	-341.114
0.0901	203.05	-339.499
0.09015	193.192	-344.729
0.0902	195.345	-339.951
0.09025	200.945	-341.737
0.0903	212.353	-340.797
0.09035	206.64	-340.221
0.0904	208.055	-335.787
0.09045	205.618	-341.517
0.0905	196.31	-336.266
0.09055	201.991	-336.079
0.0906	206.519	-338.245
0.09065	207.287	-346.122
0.0907	197.451	-340.643
0.09075	197.248	-340.822
0.0908	196.831	-342.558
0.09085	205.294	-338.96
0.0909	209.173	-337.106
0.09095	195.94	-337.259
0.091	203.721	-340.088
0.09105	202.134	-336.018
0.0911	196.424	-339.944
0.09115	197.414	-338.035
0.0912	201.914	-339.16
0.09125	192.059	-341.428
0.0913	205.717	-337.954
0.09135	201.799	-339.519
0.0914	203.738	-344.591
0.09145	202.977	-349.102
0.0915	204.428	-352.225
0.09155	206.564	-345.607
0.0916	204.68	-346.137
0.09165	196.242	-339.675
0.0917	201.28	-341.055
0.09175	198.471	-342.518
0.0918	199.124	-338.913
0.09185	196.962	-344.8
0.0919	195.28	-346.328
0.09195	198.53	-342.55
0.092	198.807	-341.282
0.09205	197.372	-347.209
0.0921	200.492	-340.623
0.09215	200.942	-340.587
0.0922	198.463	-337.522
0.09225	200.292	-340.546
0.0923	204.552	-351.284
0.09235	202.8	-346.521
0.0924	199.645	-339.898
0.09245	196.633	-341.422
0.0925	201.759	-342.192
0.09255	202.028	-340.777
0.0926	198.682	-340.544
0.09265	205.596	-342.751
0.0927	202.467	-344.115
0.09275	198.556	-343.331
0.0928	196.515	-337.753
0.09285	198.827	-343.426
0.0929	205.919	-343.149
0.09295	202.336	-349.262
0.093	199.527	-345.948
0.09305	202.79	-348.732
0.0931	200.414	-344.025
0.09315	196.751	-348.26
0.0932	200.07	-348.91
0.09325	205.126	-351.041
0.0933	202.829	-340.338
0.09335	207.461	-347.326
0.0934	199.698	-342.741
0.09345	192.576	-339.583
0.0935	204.525	-342.283
0.09355	204.784	-341.918
0.0936	197.304	-339.296
0.09365	199.906	-343.875
0.0937	200.461	-339.686
0.09375	195.572	-343.213
0.0938	202.556	-340.827
0.09385	190.015	-339.944
0.0939	200.878	-344.382
0.09395	191.891	-337.961
0.094	199.057	-336.94
0.09405	198.675	-336.457
0.0941	189.464	-336.881
0.09415	199.751	-341.599
0.0942	203.078	-346.689
0.09425	192.075	-343.08
0.0943	191.685	-340.83
0.09435	191.23	-337.367
0.0944	195.134	-338.536
0.09445	194.405	-343.761
0.0945	197.715	-342.487
0.09455	208.379	-345.121
0.0946	201.943	-340.964
0.09465	199.381	-335.842
0.0947	197.67	-342.223
0.09475	187.115	-341.147
0.0948	199.881	-342.157
0.09485	205.217	-341.646
0.0949	204.833	-340.646
0.09495	206.927	-341.807
0.095	203.105	-344.171
0.09505	198.781	-338.981
0.0951	187.008	-345.621
0.09515	199.961	-340.782
0.0952	202.555	-341.817
0.09525	201.615	-347.937
0.0953	205.283	-345.734
0.09535	196.642	-341.188
0.0954	203.034	-342.311
0.09545	204.336	-342.454
0.0955	202.062	-339.817
0.09555	208.01	-348.127
0.0956	208.123	-344.291
0.09565	208.091	-343.887
0.0957	205.698	-344.291
0.09575	202.075	-346.83
0.0958	199.731	-349.46
0.09585	203.354	-351.374
0.0959	203.106	-344.391
0.09595	202.979	-339.932
0.096	200.101	-340.482
0.09605	196.168	-340.449
0.0961	206.218	-349.24
0.09615	205.927	-347.256
0.0962	204.849	-348.231
0.09625	198.461	-345.147
0.0963	203.861	-348.979
0.09635	200.812	-343.811
0.0964	205.505	-346.643
0.09645	196.402	-343.837
0.0965	192.878	-343.588
0.09655	204.583	-349.994
0.0966	208.016	-342.823
0.09665	194.472	-344.658
0.0967	198.928	-343.498
0.09675	193.698	-340.671
0.0968	190.752	-341.556
0.09685	193.622	-340.783
0.0969	197.048	-339.883
0.09695	201.743	-341.988
0.097	201.74	-342.058
0.09705	201.873	-349.511
0.0971	199.341	-345.213
0.09715	201.794	-340.408
0.0972	201.78	-343.401
0.09725	206.915	-345.69
0.0973	205.957	-353.049
0.09735	198.599	-341.081
0.0974	203.8	-340.582
0.09745	201.781	-339.164
0.0975	202.324	-345.347
0.09755	200.168	-348.914
0.0976	207.796	-345.349
0.09765	207.255	-342.247
0.0977	201.912	-339.534
0.09775	207.795	-340.842
0.0978	202.53	-338.945
0.09785	192.719	-337.853
0.0979	183.233	-338.284
0.09795	191.084	-340.366
0.098	210.733	-348.403
0.09805	207.043	-350.631
0.0981	203.878	-349.052
0.09815	195.185	-340.673
0.0982	194.823	-335.775
0.09825	204.13	-336.297
0.0983	200.593	-338.792
0.09835	192.735	-341.54
0.0984	196.434	-338.768
0.09845	195.41	-341.649
0.0985	194.293	-342.329
0.09855	193.118	-342.756
0.0986	198.939	-339.866
0.09865	208.819	-343.027
0.0987	202.88	-341.675
0.09875	200.53	-341.787
0.0988	206.995	-341.269
0.09885	201.664	-339.995
0.0989	200.853	-342.168
0.09895	196.542	-345.212
0.099	203.294	-343.101
0.09905	205.258	-342.635
0.0991	200.035	-343.674
0.09915	191.678	-344.525
0.0992	200.978	-338.774
0.09925	196.77	-340.928
0.0993	196.777	-345.102
0.09935	207.516	-344.366
0.0994	199.198	-342.6
0.09945	200.478	-344.618
0.0995	189.548	-344.988
0.09955	198.781	-341.987
0.0996	204.177	-339.022
0.09965	202.904	-339.939
0.0997	206.927	-348.22
0.09975	207.086	-352.126
[truncated: 198,376+ more rows]

## Sheet: G7 1mM
Dark-field trace				Fig.6C
E236A-WT/55 G7		1mM ATP
20000 fps
time	X-axis	Y-axis
0	376.916	-272.521
5e-05	376.872	-271.426
0.0001	377.471	-273.45
0.00015	378.539	-276.734
0.0002	377.713	-276.324
0.00025	378.332	-274.242
0.0003	378.009	-272.7
0.00035	378.814	-276.855
0.0004	379.505	-274.373
0.00045	378.538	-279.523
0.0005	378.123	-272.536
0.00055	377.719	-279.742
0.0006	378.513	-277.756
0.00065	378.672	-275.906
0.0007	377.879	-274.365
0.00075	377.413	-275.481
0.0008	377.8	-274.851
0.00085	377.901	-275.212
0.0009	378.579	-276.624
0.00095	378.992	-275.91
0.001	378.659	-270.67
0.00105	379.517	-278.966
0.0011	378.17	-275.989
0.00115	379.305	-274.287
0.0012	378.759	-278.168
0.00125	377.868	-271.259
0.0013	379.353	-274.91
0.00135	379.955	-270.141
0.0014	378.827	-276.235
0.00145	379.345	-271.777
0.0015	377.709	-276.455
0.00155	379.041	-277.157
0.0016	378.603	-277.949
0.00165	378.546	-277.881
0.0017	377.31	-271.57
0.00175	379.482	-274.453
0.0018	379.222	-276.394
0.00185	379.255	-276.391
0.0019	379.012	-276.312
0.00195	376.881	-276.251
0.002	378.159	-273.849
0.00205	378.455	-276.712
0.0021	378.348	-275.53
0.00215	378.147	-274.842
0.0022	378.732	-277.814
0.00225	377.242	-272.534
0.0023	380.531	-277.882
0.00235	376.5	-270.768
0.0024	378.821	-276.635
0.00245	377.984	-279.549
0.0025	377.095	-274.223
0.00255	377.063	-276.207
0.0026	377.887	-273.327
0.00265	377.911	-277.171
0.0027	378.08	-275.995
0.00275	378.952	-277.441
0.0028	377.249	-272.312
0.00285	377.985	-273.213
0.0029	379.162	-277.849
0.00295	378.033	-276.553
0.003	377.974	-275.704
0.00305	377.501	-276.587
0.0031	378.68	-274.977
0.00315	379.999	-274.228
0.0032	376.91	-273.091
0.00325	378.675	-276.609
0.0033	377.218	-273.25
0.00335	379.961	-274.64
0.0034	377.762	-271
0.00345	378.106	-274.982
0.0035	377.198	-272.284
0.00355	377.588	-269.977
0.0036	377.762	-275.333
0.00365	378.142	-275.505
0.0037	377.498	-270.627
0.00375	377.455	-275.293
0.0038	377.661	-272.997
0.00385	378.42	-275.428
0.0039	377.965	-274.778
0.00395	378.903	-279.174
0.004	378.034	-271.349
0.00405	376.769	-272.038
0.0041	377.737	-271.842
0.00415	377.65	-273.768
0.0042	377.497	-273.816
0.00425	377.67	-274.383
0.0043	378.554	-278.396
0.00435	377.495	-267.1
0.0044	379.369	-273.752
0.00445	379.341	-275.098
0.0045	376.904	-274.17
0.00455	378.796	-273.4
0.0046	378.186	-279.037
0.00465	376.525	-279.24
0.0047	376.934	-269.14
0.00475	379.082	-267.595
0.0048	378.209	-274.103
0.00485	377	-270.183
0.0049	379.437	-274.102
0.00495	377.225	-272.938
0.005	378.5	-278.009
0.00505	378.378	-271.756
0.0051	378.459	-279.298
0.00515	376.496	-276.526
0.0052	376.824	-274.003
0.00525	376.834	-271.973
0.0053	376.593	-273.44
0.00535	377.865	-279.043
0.0054	377.623	-275.151
0.00545	377.477	-275.967
0.0055	377.253	-276.534
0.00555	378.501	-277.77
0.0056	377.62	-278.49
0.00565	379.063	-275.602
0.0057	378.458	-274.359
0.00575	377.717	-277.256
0.0058	377.281	-276.09
0.00585	378.616	-275.939
0.0059	376.802	-273.253
0.00595	376.885	-277.372
0.006	379.914	-280.977
0.00605	379.076	-274.187
0.0061	377.435	-279.782
0.00615	378.614	-275.785
0.0062	378.528	-278.313
0.00625	380.514	-275.762
0.0063	378.201	-274.902
0.00635	379.271	-273.699
0.0064	378.33	-270.617
0.00645	379.498	-275.368
0.0065	379.413	-277.12
0.00655	379.631	-278.996
0.0066	378.86	-279.837
0.00665	377.633	-278.711
0.0067	378.481	-275.75
0.00675	380.136	-278.341
0.0068	377.442	-274.802
0.00685	380.057	-279.037
0.0069	379.654	-275.949
0.00695	377.667	-277.852
0.007	378.683	-270.715
0.00705	378.711	-278.178
0.0071	378.408	-274.565
0.00715	376.698	-271.11
0.0072	377.885	-272.275
0.00725	377.075	-277.049
0.0073	378.037	-273
0.00735	378.415	-275.242
0.0074	379.31	-276.382
0.00745	378.264	-275.966
0.0075	378.146	-274.858
0.00755	377.296	-272.568
0.0076	379.023	-276.695
0.00765	378.812	-274.564
0.0077	377.938	-268.88
0.00775	378.405	-278.064
0.0078	378.838	-277.156
0.00785	378.167	-275.762
0.0079	378.41	-272.671
0.00795	379.276	-273.185
0.008	379.579	-274.161
0.00805	379.21	-274.318
0.0081	379.503	-275.56
0.00815	379.269	-275.139
0.0082	377.688	-273.047
0.00825	379.455	-280.222
0.0083	378.247	-272.728
0.00835	378.243	-277.562
0.0084	378.611	-271.543
0.00845	377.548	-276.874
0.0085	378.107	-268.086
0.00855	377.82	-274.956
0.0086	379.172	-275.248
0.00865	379.118	-276.153
0.0087	378.178	-276.668
0.00875	379.259	-272.725
0.0088	377.834	-277.931
0.00885	379.23	-281.336
0.0089	377.265	-278.701
0.00895	378.23	-274.977
0.009	378.226	-274.767
0.00905	378.675	-275.562
0.0091	378.816	-277.605
0.00915	377.521	-274.187
0.0092	377.066	-271.943
0.00925	377.939	-277.79
0.0093	378.717	-272.429
0.00935	379.286	-275.828
0.0094	377.791	-274.267
0.00945	378.509	-273.067
0.0095	379.544	-274.916
0.00955	379.847	-275.364
0.0096	377.616	-276.31
0.00965	380.082	-274.733
0.0097	378.086	-275.455
0.00975	379.189	-273.923
0.0098	378.673	-272.739
0.00985	378.025	-272.782
0.0099	380.415	-278.641
0.00995	378.996	-274.142
0.01	379.038	-272.683
0.01005	379.304	-277.557
0.0101	378.123	-277.231
0.01015	377.92	-279.576
0.0102	379.323	-274.41
0.01025	377.61	-274.802
0.0103	377.324	-269.242
0.01035	376.743	-276.79
0.0104	380.092	-271.365
0.01045	376.943	-272.722
0.0105	377.899	-270.1
0.01055	378.124	-276.21
0.0106	378.873	-277.757
0.01065	379.085	-276.35
0.0107	379.497	-279.437
0.01075	379.767	-276.347
0.0108	379.262	-272.072
0.01085	376.627	-267.71
0.0109	377.902	-273.251
0.01095	379.929	-272.888
0.011	380.722	-278.337
0.01105	379.491	-277.792
0.0111	378.819	-274.822
0.01115	376.296	-274.662
0.0112	378.235	-278.725
0.01125	378.188	-272.342
0.0113	376.909	-270.115
0.01135	378.515	-272.025
0.0114	377.865	-273.16
0.01145	378.709	-278.12
0.0115	377.077	-277.957
0.01155	380.134	-274.652
0.0116	378.489	-271.939
0.01165	380.017	-273.31
0.0117	378.635	-275.928
0.01175	378.735	-277.603
0.0118	378.081	-275.942
0.01185	378.136	-276.009
0.0119	376.675	-273.479
0.01195	379.165	-274.694
0.012	379.616	-278.326
0.01205	379.452	-279.787
0.0121	379.822	-279.066
0.01215	379.333	-275.669
0.0122	378.893	-275.003
0.01225	378.577	-276.475
0.0123	380.221	-273.614
0.01235	378.056	-273.355
0.0124	379.609	-278.496
0.01245	377.891	-279.147
0.0125	377.537	-272.406
0.01255	378.452	-275.558
0.0126	378.426	-276.17
0.01265	377.808	-274.559
0.0127	378.035	-273.823
0.01275	377.721	-278.436
0.0128	379.368	-277.951
0.01285	379.187	-276.115
0.0129	378.946	-272.61
0.01295	377.759	-273.647
0.013	378.379	-275.939
0.01305	378.685	-275.569
0.0131	377.219	-271.849
0.01315	377.253	-271.179
0.0132	378.317	-275.61
0.01325	376.286	-268.105
0.0133	379.727	-273.323
0.01335	379.459	-280.056
0.0134	378.599	-273.07
0.01345	380.323	-279.086
0.0135	378.726	-276.1
0.01355	378.385	-271.735
0.0136	379.719	-275.57
0.01365	378.095	-278.183
0.0137	378.419	-277.677
0.01375	378.246	-279.128
0.0138	379.466	-276.318
0.01385	378.006	-275.639
0.0139	378.186	-271.136
0.01395	377.709	-274.167
0.014	376.833	-277.088
0.01405	378.791	-271.178
0.0141	378.577	-278.149
0.01415	379.978	-277.71
0.0142	378.133	-268.437
0.01425	377.684	-271.697
0.0143	375.817	-268.535
0.01435	376.047	-270.895
0.0144	378.341	-272.955
0.01445	378.814	-270.785
0.0145	376.168	-269.35
0.01455	376.976	-270.815
0.0146	379.176	-274.236
0.01465	378.402	-273.143
0.0147	376.944	-273.597
0.01475	377.294	-275.18
0.0148	377.88	-276.917
0.01485	378.577	-274.348
0.0149	379.351	-278.877
0.01495	378.458	-275.586
0.015	377.873	-273.014
0.01505	378.787	-275.765
0.0151	376.576	-269.306
0.01515	378.245	-273.712
0.0152	378.973	-276.391
0.01525	378.387	-275.522
0.0153	378.642	-271.923
0.01535	378.005	-278.833
0.0154	378.209	-277.55
0.01545	377.727	-275.529
0.0155	378.238	-274.463
0.01555	378.005	-273.395
0.0156	377.987	-273.193
0.01565	379.645	-270.024
0.0157	379.368	-276.971
0.01575	377.612	-277.485
0.0158	377.062	-273.043
0.01585	379.39	-275.831
0.0159	378.032	-274.382
0.01595	377.667	-274.731
0.016	377.863	-275.032
0.01605	378.559	-276.117
0.0161	379.144	-274.886
0.01615	377.813	-278.855
0.0162	379.673	-281.033
0.01625	378.124	-270.472
0.0163	379.63	-280.032
0.01635	377.14	-275.358
0.0164	376.709	-272.089
0.01645	377.484	-274.038
0.0165	377.59	-274.179
0.01655	378.896	-277.576
0.0166	379.678	-277.886
0.01665	378.592	-272.342
0.0167	379.803	-277.509
0.01675	378.58	-275.911
0.0168	378.913	-272.148
0.01685	377.652	-274.804
0.0169	377.677	-276.513
0.01695	377.621	-269.208
0.017	378.549	-279.158
0.01705	378.844	-272.638
0.0171	378.066	-273.084
0.01715	379.705	-277.485
0.0172	376.622	-276.876
0.01725	377.058	-272.006
0.0173	377.299	-270.225
0.01735	378.74	-277.351
0.0174	378.68	-272.941
0.01745	379.17	-278.948
0.0175	378.484	-273.279
0.01755	378.174	-271.387
0.0176	379.172	-275.649
0.01765	377.363	-272.633
0.0177	379.904	-278.57
0.01775	378.742	-274.391
0.0178	378.167	-273.406
0.01785	378.671	-279.838
0.0179	377.972	-276.469
0.01795	377.089	-280.217
0.018	378.739	-276.792
0.01805	378.455	-274.734
0.0181	380.406	-272.728
0.01815	379.653	-277.488
0.0182	378.538	-277.12
0.01825	379.624	-278.362
0.0183	378.385	-274.628
0.01835	378.042	-270.536
0.0184	378.206	-275.578
0.01845	378.495	-272.309
0.0185	378.14	-277.1
0.01855	378.953	-272.728
0.0186	378.319	-274.621
0.01865	378.546	-271.597
0.0187	379.178	-276.681
0.01875	379.02	-276.454
0.0188	378.74	-277.698
0.01885	377.636	-275.53
0.0189	377.451	-275.002
0.01895	379.197	-275.874
0.019	377.499	-275.466
0.01905	379.095	-277.224
0.0191	377.316	-273.931
0.01915	377.841	-275.188
0.0192	379.099	-280.131
0.01925	380.764	-279.899
0.0193	378.621	-277.783
0.01935	378.223	-277.428
0.0194	378.17	-278.325
0.01945	378.517	-280.995
0.0195	379.643	-277.8
0.01955	379.979	-276.651
0.0196	378.486	-272.568
0.01965	378.473	-277.417
0.0197	377.918	-274.929
0.01975	376.897	-276.648
0.0198	378.557	-278.457
0.01985	379.122	-277.66
0.0199	380.118	-278.552
0.01995	379.109	-275.592
0.02	378.401	-276.584
0.02005	376.943	-272.474
0.0201	378.813	-278.726
0.02015	377.209	-272.843
0.0202	379.317	-276.622
0.02025	378.128	-273.82
0.0203	377.847	-278.631
0.02035	377.53	-275.157
0.0204	379.617	-277.654
0.02045	379.748	-275.032
0.0205	379.492	-278.137
0.02055	379.725	-279.475
0.0206	379.422	-279.473
0.02065	378.947	-275.987
0.0207	376.889	-274.272
0.02075	378.257	-273.62
0.0208	378.074	-268.963
0.02085	377.808	-268.171
0.0209	378.337	-278.008
0.02095	377.74	-270.827
0.021	378.592	-275.915
0.02105	378.065	-275.4
0.0211	378.978	-275.129
0.02115	376.822	-274.342
0.0212	375.687	-272.975
0.02125	379.084	-277.346
0.0213	377.47	-270.181
0.02135	378.081	-278.37
0.0214	377.203	-279.194
0.02145	376.697	-276.092
0.0215	377.948	-274.269
0.02155	377.077	-274.19
0.0216	375.782	-267.666
0.02165	377.115	-278.522
0.0217	378.27	-274.501
0.02175	376.551	-275.738
0.0218	377.303	-279.966
0.02185	379.291	-280.719
0.0219	378.19	-277.81
0.02195	378.55	-278.053
0.022	378.404	-272.427
0.02205	377.516	-273.289
0.0221	376.757	-276.581
0.02215	377.836	-275.309
0.0222	379.91	-276.185
0.02225	378.125	-274.12
0.0223	376.684	-269.641
0.02235	377.201	-272.133
0.0224	378.935	-275.882
0.02245	376.354	-275.898
0.0225	376.769	-277.181
0.02255	378.298	-275.143
0.0226	377.318	-274.96
0.02265	376.573	-275.319
0.0227	377.963	-279.403
0.02275	377.319	-273.445
0.0228	377.613	-276.37
0.02285	378.549	-275.472
0.0229	378.586	-276.544
0.02295	377.401	-279.547
0.023	377.929	-277.173
0.02305	378.356	-279.427
0.0231	379.281	-278.241
0.02315	377.513	-275.455
0.0232	378.89	-277.199
0.02325	377.092	-274.624
0.0233	379.859	-277.346
0.02335	377.479	-278.297
0.0234	378.883	-279.361
0.02345	379.915	-282.238
0.0235	377.984	-279.138
0.02355	378.672	-275.322
0.0236	380.356	-279.444
0.02365	377.92	-276.185
0.0237	378.496	-270.972
0.02375	377.182	-272.749
0.0238	377.259	-272.903
0.02385	378.623	-278.262
0.0239	378.109	-274.234
0.02395	377.999	-276.605
0.024	379.054	-279.717
0.02405	377.025	-277.507
0.0241	378.798	-280.749
0.02415	376.413	-278.197
0.0242	378.283	-282.778
0.02425	377.847	-274.82
0.0243	376.116	-273.452
0.02435	377.981	-273.377
0.0244	376.295	-272.31
0.02445	378.069	-272.456
0.0245	377.108	-273.386
0.02455	379.615	-277.634
0.0246	377.651	-278.529
0.02465	378.537	-273.862
0.0247	377.592	-271.095
0.02475	377.16	-274.702
0.0248	377.346	-271.445
0.02485	378.213	-272.991
0.0249	378.689	-271.437
0.02495	378.125	-276.336
0.025	379.684	-275.413
0.02505	379.117	-276.492
0.0251	377.956	-275.411
0.02515	378.863	-276.26
0.0252	377.727	-272.917
0.02525	379.324	-281.057
0.0253	378.353	-278.369
0.02535	378.038	-270.929
0.0254	376.423	-269.024
0.02545	379.323	-275.19
0.0255	378.137	-270.599
0.02555	378.616	-273.066
0.0256	376.867	-276.35
0.02565	377.004	-270.049
0.0257	378.638	-276.24
0.02575	380.374	-271.257
0.0258	378.118	-270.602
0.02585	377.843	-274.649
0.0259	378.339	-269.895
0.02595	377.472	-271.879
0.026	376.959	-274.931
0.02605	379.253	-282.205
0.0261	379.839	-275.098
0.02615	377.711	-272.176
0.0262	377.668	-271.903
0.02625	379.466	-274.942
0.0263	377.598	-268.7
0.02635	379.919	-274.844
0.0264	378.147	-267.705
0.02645	378.867	-275.693
0.0265	378.476	-278.018
0.02655	378.214	-273.543
0.0266	379.403	-275.896
0.02665	379.2	-275.713
0.0267	377.654	-275.56
0.02675	380.001	-276.654
0.0268	378.196	-277.784
0.02685	377.85	-276.635
0.0269	378.133	-272.421
0.02695	378.667	-276.412
0.027	377.354	-278.812
0.02705	378.74	-276.884
0.0271	379.972	-277.184
0.02715	378.239	-270.769
0.0272	378.347	-271.552
0.02725	380.052	-277.662
0.0273	379.112	-272.552
0.02735	379.288	-274.85
0.0274	379.584	-275.263
0.02745	378.218	-276.974
0.0275	378.521	-278.239
0.02755	378.172	-270.549
0.0276	378.822	-272.523
0.02765	377.906	-274.49
0.0277	380.509	-276.456
0.02775	377.097	-273.76
0.0278	379.526	-278.471
0.02785	376.611	-268.915
0.0279	377.865	-276.436
0.02795	378.418	-277.741
0.028	377.423	-277.767
0.02805	378.169	-276.2
0.0281	379.492	-277.852
0.02815	378.189	-272.419
0.0282	377.783	-266.776
0.02825	377.29	-271.319
0.0283	378.429	-274.258
0.02835	378.898	-274.98
0.0284	378.955	-277.207
0.02845	378.2	-275.114
0.0285	378.052	-269.882
0.02855	377.245	-266.988
0.0286	378.144	-271.057
0.02865	377.615	-271.687
0.0287	379.554	-273.374
0.02875	379.191	-276.042
0.0288	378.344	-279.54
0.02885	377.633	-273.839
0.0289	377.969	-274.17
0.02895	377.241	-270.175
0.029	379.474	-272.953
0.02905	377.642	-270.212
0.0291	378.972	-280.343
0.02915	377.818	-274.637
0.0292	377.689	-272.706
0.02925	377.691	-275.457
0.0293	379.789	-280.196
0.02935	380.335	-272.251
0.0294	377.548	-271.153
0.02945	379.611	-275.332
0.0295	378.818	-274.023
0.02955	379.253	-276.06
0.0296	377.991	-270.249
0.02965	379.808	-275.423
0.0297	378.693	-274.652
0.02975	379.531	-271.245
0.0298	379.528	-275.526
0.02985	378.112	-275.183
0.0299	378.075	-273.595
0.02995	377.74	-272.991
0.03	378.132	-272.233
0.03005	379.459	-275.752
0.0301	378.107	-274.488
0.03015	378.084	-278.998
0.0302	379.18	-278.562
0.03025	378.499	-272.428
0.0303	379.299	-275.143
0.03035	380.514	-275.341
0.0304	379.413	-270.663
0.03045	379.319	-269.998
0.0305	380.086	-277.396
0.03055	380.179	-275.27
0.0306	379.023	-279.537
0.03065	380.074	-279.043
0.0307	381.238	-276.158
0.03075	380.88	-277.922
0.0308	380.178	-274.782
0.03085	380.543	-275.544
0.0309	381.405	-274.73
0.03095	379.203	-276.673
0.031	380.788	-273.624
0.03105	379.145	-274.039
0.0311	379.431	-267.324
0.03115	379.707	-276.274
0.0312	380.284	-272.711
0.03125	379.276	-268.228
0.0313	379.543	-273.521
0.03135	380.506	-277.506
0.0314	379.428	-273.989
0.03145	378.5	-272.379
0.0315	379.261	-272.781
0.03155	379.831	-274.401
0.0316	379.586	-272.686
0.03165	379.097	-267.881
0.0317	379.975	-274.96
0.03175	378.9	-273.857
0.0318	378.049	-268.015
0.03185	379.033	-279.656
0.0319	378.264	-274.31
0.03195	378.504	-268.146
0.032	377.357	-271.575
0.03205	379.964	-275.123
0.0321	378.309	-273.231
0.03215	378.733	-273.917
0.0322	377.878	-271.641
0.03225	378.985	-275.313
0.0323	378.067	-277.339
0.03235	378.954	-274.823
0.0324	379.123	-268.167
0.03245	378.298	-268.844
0.0325	378.596	-266.878
0.03255	378.256	-270.162
0.0326	379.375	-269.526
0.03265	378.381	-276.812
0.0327	377.309	-278.076
0.03275	378.849	-273.793
0.0328	379.152	-276.041
0.03285	378.257	-268.003
0.0329	379.923	-270.79
0.03295	378.139	-273.705
0.033	379.62	-274.169
0.03305	379.281	-275.173
0.0331	378.819	-270.098
0.03315	378.12	-271.935
0.0332	379.772	-270.492
0.03325	379.941	-273.527
0.0333	379.179	-275.79
0.03335	379.291	-274.685
0.0334	377.943	-266.19
0.03345	378.142	-269.982
0.0335	381.526	-273.39
0.03355	379.466	-275.602
0.0336	380.931	-274.893
0.03365	378.835	-273.906
0.0337	379.26	-270.086
0.03375	377.153	-267.519
0.0338	378.706	-273.553
0.03385	377.839	-271.46
0.0339	378.968	-276.544
0.03395	379.556	-271.755
0.034	378.137	-275.198
0.03405	380.094	-278.369
0.0341	379.359	-274.036
0.03415	378.073	-272.747
0.0342	377.457	-275.298
0.03425	377.04	-273.951
0.0343	377.143	-266.755
0.03435	378.558	-272.72
0.0344	378.25	-272.777
0.03445	376.952	-274.048
0.0345	377.217	-272.875
0.03455	378.417	-275.873
0.0346	378.746	-275.444
0.03465	377.604	-268.687
0.0347	378.454	-276.199
0.03475	377.789	-272.868
0.0348	377.972	-270.292
0.03485	378.278	-270.306
0.0349	378.502	-277.811
0.03495	378.138	-277.102
0.035	378.27	-273.602
0.03505	380.745	-274.024
0.0351	380.198	-280.1
0.03515	377.89	-271.927
0.0352	378.026	-277.65
0.03525	379.727	-279.519
0.0353	379.752	-275.214
0.03535	381.287	-277.743
0.0354	379.854	-270.176
0.03545	380.768	-279.857
0.0355	378.923	-274.058
0.03555	379.221	-273.766
0.0356	379.174	-272.674
0.03565	379.447	-272.041
0.0357	379.756	-273.517
0.03575	380.074	-276.311
0.0358	378.395	-272.396
0.03585	379.833	-273.755
0.0359	379.574	-277.492
0.03595	378.054	-272.095
0.036	379.568	-276.055
0.03605	378.229	-275.387
0.0361	380.812	-273.563
0.03615	379.54	-276.21
0.0362	379.681	-275.767
0.03625	379.353	-273.174
0.0363	377.631	-269.9
0.03635	377.033	-272.332
0.0364	376.165	-275.374
0.03645	378.08	-268.666
0.0365	378.18	-271.456
0.03655	376.957	-274.432
0.0366	377.953	-271.457
0.03665	377.603	-274.55
0.0367	377.772	-271.246
0.03675	378.105	-270.945
0.0368	376.793	-269.057
0.03685	378.406	-271.773
0.0369	378.619	-272.639
0.03695	377.109	-270.318
0.037	379.396	-272.747
0.03705	379.71	-275.829
0.0371	378.867	-272.433
0.03715	378.644	-273.683
0.0372	379.307	-278.263
0.03725	377.6	-272.147
0.0373	378.454	-273.473
0.03735	379.655	-277.161
0.0374	377.22	-267.802
0.03745	380.965	-274.161
0.0375	379.039	-272.087
0.03755	379.339	-274.125
0.0376	377.807	-269.708
0.03765	380.654	-276.11
0.0377	379.793	-276.651
0.03775	380.887	-274.832
0.0378	379.087	-269.576
0.03785	382.431	-275.19
0.0379	380.234	-271.955
0.03795	380.151	-272.676
0.038	379.304	-271.249
0.03805	380.521	-276.445
0.0381	379.654	-275.652
0.03815	379.652	-280.859
0.0382	381.258	-278.465
0.03825	378.681	-271.593
0.0383	379.464	-272.705
0.03835	379.174	-273.356
0.0384	379.74	-272.03
0.03845	376.737	-266.718
0.0385	379.408	-274.465
0.03855	379.446	-271.912
0.0386	379.074	-272.767
0.03865	379.989	-271.955
0.0387	378.669	-268.698
0.03875	378.372	-276.384
0.0388	378.831	-275.069
0.03885	379.463	-276.175
0.0389	380.563	-274.623
0.03895	378.092	-270.17
0.039	378.416	-272.557
0.03905	379.626	-273.208
0.0391	379.693	-278.321
0.03915	377.764	-271.415
0.0392	377.722	-268.346
0.03925	377.939	-273.317
0.0393	379.96	-279.339
0.03935	378.803	-279.912
0.0394	378.793	-275.561
0.03945	379.889	-275.469
0.0395	378.372	-274.004
0.03955	379.557	-274.411
0.0396	379.389	-268.446
0.03965	381.459	-273.614
0.0397	378.172	-275.557
0.03975	380.605	-271.194
0.0398	378.244	-271.258
0.03985	378.374	-276.2
0.0399	378.968	-273.079
0.03995	378.489	-272.935
0.04	377.456	-269.774
0.04005	377.201	-267.137
0.0401	379.171	-272.897
0.04015	379.794	-277.03
0.0402	379.078	-273.856
0.04025	377.035	-265.244
0.0403	379.846	-277.673
0.04035	379.711	-274.552
0.0404	380.279	-276.164
0.04045	380.077	-280.204
0.0405	380.999	-277.293
0.04055	379.455	-271.798
0.0406	377.947	-276.806
0.04065	380.582	-277.165
0.0407	380.117	-273.272
0.04075	379.313	-278.755
0.0408	379.095	-274.839
0.04085	380.584	-277.16
0.0409	380.251	-272.277
0.04095	379.625	-277.947
0.041	379.985	-278.677
0.04105	379.465	-275.779
0.0411	377.878	-271.874
0.04115	380.747	-278.368
0.0412	380.015	-275.343
0.04125	380.166	-279.017
0.0413	381.798	-277.519
0.04135	378.194	-268.535
0.0414	379.315	-273.595
0.04145	377.705	-274.424
0.0415	380.52	-276.638
0.04155	379.15	-272.856
0.0416	380.081	-277.26
0.04165	378.726	-278.982
0.0417	380.016	-279.854
0.04175	380.125	-276.154
0.0418	380.222	-277.323
0.04185	379.125	-274.248
0.0419	380.411	-275.118
0.04195	379.019	-272.754
0.042	381.051	-279.289
0.04205	380.103	-274.821
0.0421	379.995	-276.189
0.04215	379.759	-272.966
0.0422	380.895	-275.777
0.04225	380.234	-275.447
0.0423	380.934	-274.409
0.04235	380.341	-268.697
0.0424	381.153	-275.983
0.04245	378.974	-277.577
0.0425	380.825	-273.334
0.04255	380.608	-268.115
0.0426	379.172	-265.448
0.04265	380.623	-273.984
0.0427	381.783	-276.152
0.04275	380.405	-271.573
0.0428	381.126	-275.329
0.04285	379.96	-273.617
0.0429	379.727	-270.413
0.04295	379.311	-274.239
0.043	379.06	-268.005
0.04305	380.441	-278.38
0.0431	379.846	-270.606
0.04315	378.99	-273.639
0.0432	380.119	-273.927
0.04325	379.247	-270.3
0.0433	378.228	-264.895
0.04335	380.401	-276.99
0.0434	378.31	-274.034
0.04345	378.327	-273.638
0.0435	379.962	-277.657
0.04355	378.419	-271.375
0.0436	379.419	-269.067
0.04365	379.712	-272.85
0.0437	380.656	-276.983
0.04375	379.038	-272.469
0.0438	377.666	-273.688
0.04385	378.91	-275.298
0.0439	379.183	-275.87
0.04395	378.787	-276.834
0.044	378.693	-270.893
0.04405	381.26	-278.688
0.0441	380.458	-274.366
0.04415	380.264	-275.453
0.0442	378.97	-269.357
0.04425	380.469	-273.833
0.0443	378.366	-272.267
0.04435	382.096	-274.726
0.0444	379.77	-272.8
0.04445	378.862	-270.563
0.0445	380.156	-275.525
0.04455	381.125	-273.149
0.0446	380.522	-276.583
0.04465	381.282	-277.818
0.0447	380.393	-274.405
0.04475	377.572	-272.923
0.0448	382.374	-278.027
0.04485	379.372	-275.958
0.0449	381.535	-274.928
0.04495	380.418	-273.264
0.045	380.175	-279.226
0.04505	381.839	-274.455
0.0451	380.411	-275.638
0.04515	379.143	-273.686
0.0452	379.618	-275.147
0.04525	381.602	-279.376
0.0453	379.618	-278.294
0.04535	380.89	-276.381
0.0454	378.276	-274.644
0.04545	379.081	-276.348
0.0455	377.756	-279.399
0.04555	379.643	-278.139
0.0456	378.049	-274.026
0.04565	377.481	-273.357
0.0457	377.969	-273.284
0.04575	378.572	-275.43
0.0458	379.21	-274.767
0.04585	379.164	-276.599
0.0459	378.85	-277.617
0.04595	379.838	-272.913
0.046	378.381	-271.628
0.04605	379.404	-274.608
0.0461	378.488	-271.858
0.04615	379.271	-274.978
0.0462	380.594	-275.965
0.04625	379.197	-273.297
0.0463	378.531	-275.774
0.04635	379.714	-277.179
0.0464	378.644	-274.665
0.04645	379.615	-269.172
0.0465	379.502	-269.867
0.04655	381.732	-276.28
0.0466	378.922	-276.789
0.04665	378.409	-266.915
0.0467	381.041	-276.452
0.04675	380.998	-274.505
0.0468	380.082	-279.841
0.04685	381.042	-278.235
0.0469	380.882	-276.931
0.04695	379.706	-270.636
0.047	379.006	-275.478
0.04705	379.197	-269.516
0.0471	379.628	-271.555
0.04715	381.492	-279.705
0.0472	381.742	-274.911
0.04725	380.382	-277.427
0.0473	377.173	-275.736
0.04735	379.11	-275.973
0.0474	379.595	-275.087
0.04745	378.952	-272.227
0.0475	379.543	-271.366
0.04755	379.285	-272.62
0.0476	379.034	-267.468
0.04765	380.223	-276.264
0.0477	379.388	-273.63
0.04775	379.186	-276.463
0.0478	380.491	-276.59
0.04785	379.319	-273.291
0.0479	380.287	-275.286
0.04795	380.012	-275.73
0.048	379.087	-275.741
0.04805	380.392	-274.328
0.0481	379.687	-275.459
0.04815	380.314	-274.631
0.0482	379.155	-276.932
0.04825	380.798	-275.589
0.0483	379.123	-272.442
0.04835	380.617	-274.994
0.0484	380.875	-275.951
0.04845	379.933	-277.263
0.0485	380.119	-277.133
0.04855	380.987	-278.338
0.0486	382.182	-278.633
0.04865	382.265	-273.887
0.0487	380.75	-278.044
0.04875	379.908	-274.163
0.0488	380.752	-277.753
0.04885	379.345	-276.623
0.0489	379.95	-273.77
0.04895	379.607	-275.615
0.049	381.889	-276.184
0.04905	380.399	-276.143
0.0491	380.327	-273.642
0.04915	382.131	-275.646
0.0492	379.904	-273.841
0.04925	379.697	-271.57
0.0493	380.197	-274.781
0.04935	380.225	-275.506
0.0494	378.649	-270.179
0.04945	379.962	-274.69
0.0495	380.288	-277.375
0.04955	378.967	-266.887
0.0496	378.859	-275.234
0.04965	379.617	-274.668
0.0497	379.63	-271.639
0.04975	380.443	-275.588
0.0498	380.21	-274.567
0.04985	380.083	-273.203
0.0499	379.144	-275.735
0.04995	379.307	-275.416
0.05	377.97	-269.009
0.05005	378.477	-271.262
0.0501	381.007	-275.753
0.05015	379.34	-274.923
0.0502	380.189	-276.631
0.05025	380.612	-276.657
0.0503	379.584	-274.96
0.05035	378.019	-273.207
0.0504	379.01	-273.874
0.05045	379.149	-271.397
0.0505	380.331	-277.218
0.05055	378.88	-271.659
0.0506	379.545	-271.738
0.05065	379.624	-271.961
0.0507	380.473	-267.593
0.05075	377.225	-265.658
0.0508	380.817	-274.116
0.05085	378.587	-271.04
0.0509	379.014	-275.835
0.05095	380.308	-273.099
0.051	380.683	-272.603
0.05105	380.285	-268.922
0.0511	378.764	-270.339
0.05115	378.792	-271.064
0.0512	379.757	-275.85
0.05125	379.468	-266.323
0.0513	380.623	-278.664
0.05135	379.77	-272.872
0.0514	381.062	-277.076
0.05145	379.75	-272.677
0.0515	378.885	-269.829
0.05155	379.362	-271.018
0.0516	377.228	-268.384
0.05165	380.818	-272.431
0.0517	380.314	-275.856
0.05175	378.764	-275.508
0.0518	380.133	-268.641
0.05185	379.755	-275.801
0.0519	377.632	-266.679
0.05195	378.38	-273.598
0.052	379.454	-274.042
0.05205	380.387	-280.561
0.0521	379.872	-275.25
0.05215	378.786	-269.677
0.0522	381.319	-274.316
0.05225	378.145	-270.804
0.0523	378.306	-270.407
0.05235	381.482	-275.596
0.0524	380.258	-275.982
0.05245	380.778	-275.134
0.0525	378.706	-268.9
0.05255	379.903	-271.354
0.0526	379.642	-275.71
0.05265	377.247	-275.733
0.0527	380.71	-275.208
0.05275	378.868	-277.977
0.0528	379.157	-275.08
0.05285	378.997	-271.083
0.0529	380.212	-270.215
0.05295	378.791	-271.704
0.053	379.926	-274.162
0.05305	381.18	-275.903
0.0531	378.811	-268.786
0.05315	379.885	-274.247
0.0532	379.001	-273.317
0.05325	378.469	-266.856
0.0533	380.135	-272.555
0.05335	379.848	-273.924
0.0534	379.268	-269.5
0.05345	379.832	-269.763
0.0535	380.554	-278.504
0.05355	380.091	-275.952
0.0536	381.715	-271.601
0.05365	379.57	-272.979
0.0537	380.224	-276.187
0.05375	382.289	-280.672
0.0538	380.834	-275.672
0.05385	378.201	-270.356
0.0539	379.385	-271.51
0.05395	379.517	-269.471
0.054	380.632	-277.162
0.05405	379.982	-276.749
0.0541	379.576	-277.702
0.05415	379.598	-272.127
0.0542	380.464	-274.356
0.05425	379.581	-278.472
0.0543	379.56	-275.198
0.05435	379.334	-272.71
0.0544	379.526	-277.097
0.05445	378.991	-272.335
0.0545	380.606	-278.249
0.05455	380.773	-277.485
0.0546	378.567	-278.988
0.05465	380.005	-275.494
0.0547	378.726	-272.089
0.05475	378.013	-269.634
0.0548	378.644	-272.636
0.05485	378.623	-273.144
0.0549	380.524	-274.213
0.05495	378.537	-274.212
0.055	381.62	-274.534
0.05505	379.456	-276.227
0.0551	379.711	-269.253
0.05515	380.547	-277.428
0.0552	378.162	-264.679
0.05525	379.188	-277.998
0.0553	379.444	-272.989
0.05535	380.524	-273.532
0.0554	380.876	-273.106
0.05545	381.467	-278.509
0.0555	380.468	-274.408
0.05555	380.311	-272.868
0.0556	380.228	-274.227
0.05565	378.943	-274.567
0.0557	382.616	-278.164
0.05575	381.689	-276.676
0.0558	380.184	-279.321
0.05585	381.228	-278.867
0.0559	382.517	-277.048
0.05595	380.384	-271.911
0.056	379.543	-277.046
0.05605	380.987	-279.387
0.0561	380.709	-280.201
0.05615	380.294	-275.136
0.0562	381.205	-272.169
0.05625	381.288	-276.624
0.0563	379.664	-275.276
0.05635	378.873	-277.057
0.0564	377.598	-269.153
0.05645	380.442	-270.442
0.0565	379.988	-273.942
0.05655	381.058	-275.796
0.0566	380.883	-275.745
0.05665	380.394	-274.809
0.0567	380.573	-275.563
0.05675	381.097	-272.991
0.0568	378.826	-273.481
0.05685	380.297	-274.314
0.0569	380.737	-271.485
0.05695	378.195	-269.502
0.057	380.179	-272.829
0.05705	380.753	-277.812
0.0571	378.853	-273.934
0.05715	380.812	-274.349
0.0572	380.388	-277.884
0.05725	379.604	-274.464
0.0573	379.813	-275.491
0.05735	378.636	-275.794
0.0574	379.287	-273.202
0.05745	379.36	-269.769
0.0575	381.235	-276.512
0.05755	378.888	-274.476
0.0576	378.799	-273.515
0.05765	380.442	-275.697
0.0577	381.073	-272.421
0.05775	378.642	-272.454
0.0578	380.463	-276.785
0.05785	377.984	-267.845
0.0579	376.864	-270.294
0.05795	379.338	-276.124
0.058	379.438	-268.23
0.05805	380.062	-273.61
0.0581	380.914	-271.607
0.05815	379.498	-272.684
0.0582	380.02	-277.949
0.05825	380.309	-272.738
0.0583	381.043	-271.782
0.05835	379.723	-275.421
0.0584	380.791	-273.229
0.05845	379.305	-273.863
0.0585	380.698	-276.526
0.05855	377.754	-274.031
0.0586	378.319	-269.892
0.05865	378.079	-269.553
0.0587	378.473	-273.935
0.05875	378.74	-269.348
0.0588	379.356	-267.704
0.05885	379.708	-271.3
0.0589	377.398	-266.786
0.05895	377.017	-270.46
0.059	377.029	-271.318
0.05905	379.277	-270.676
0.0591	379.234	-269.698
0.05915	379.287	-274.024
0.0592	380.249	-279.196
0.05925	380.58	-276.759
0.0593	379.083	-278.668
0.05935	378.736	-272.337
0.0594	381.36	-279.389
0.05945	380.17	-278.04
0.0595	378.55	-272.419
0.05955	380.664	-277.5
0.0596	379.532	-277.582
0.05965	380.048	-274.671
0.0597	378.716	-276.952
0.05975	377.733	-271.044
0.0598	379.756	-276.851
0.05985	378.876	-278.248
0.0599	379.53	-273.673
0.05995	381.388	-278.373
0.06	379.184	-274.678
0.06005	379.233	-270.052
0.0601	379.059	-268.742
0.06015	379.247	-274.073
0.0602	378.38	-271.878
0.06025	379.544	-271.366
0.0603	379.508	-274.064
0.06035	381.16	-273.449
0.0604	379.805	-268.934
0.06045	379.801	-271.796
0.0605	381.09	-274.45
0.06055	380.307	-277.466
0.0606	379.483	-273.221
0.06065	380.648	-272.079
0.0607	379.884	-268.921
0.06075	380.826	-277.588
0.0608	380.453	-273.435
0.06085	381.83	-272.558
0.0609	379.642	-273.607
0.06095	378.63	-276.842
0.061	380.456	-272.238
0.06105	380.779	-274.621
0.0611	379.424	-272.868
0.06115	380.071	-272.851
0.0612	381.014	-276.69
0.06125	379.984	-276.24
0.0613	379.747	-274.747
0.06135	378.704	-271.675
0.0614	380.387	-273.799
0.06145	379.757	-276.131
0.0615	379.154	-275.117
0.06155	379.133	-278.029
0.0616	378.879	-276.73
0.06165	377.957	-273.578
0.0617	378.99	-275.763
0.06175	378.557	-276.866
0.0618	379.926	-278.454
0.06185	379.488	-275.269
0.0619	378.666	-274.989
0.06195	379.488	-272.359
0.062	378.287	-269.776
0.06205	377.95	-275.67
0.0621	379.298	-277.767
0.06215	377.74	-270.488
0.0622	379.973	-269.671
0.06225	379.712	-274.045
0.0623	380.124	-274.04
0.06235	379.604	-276.169
0.0624	379.654	-274.117
0.06245	380.737	-274.192
0.0625	381.913	-274.927
0.06255	380.137	-274.577
0.0626	379.847	-274.399
0.06265	379.663	-274.91
0.0627	378.62	-272.313
0.06275	381.345	-277.352
0.0628	380.198	-276.564
0.06285	380.325	-275.615
0.0629	380.373	-273.314
0.06295	379.954	-271
0.063	381.453	-273.729
0.06305	379.412	-274.871
0.0631	379.04	-274.955
0.06315	381.104	-277.503
0.0632	379.805	-273.791
0.06325	379.235	-275.094
0.0633	379.837	-276.966
0.06335	379.744	-276.966
0.0634	380.713	-273.39
0.06345	379.964	-274.036
0.0635	379.071	-277.533
0.06355	379.119	-276.383
0.0636	378.198	-273.69
0.06365	379.198	-273.352
0.0637	380.137	-278.63
0.06375	378.894	-272.745
0.0638	380.834	-272.237
0.06385	379.95	-277.754
0.0639	379.222	-278.469
0.06395	378.71	-280.271
0.064	379.365	-270.398
0.06405	378.527	-277.33
0.0641	378.754	-272.246
0.06415	379.518	-273.237
0.0642	378.725	-274.156
0.06425	379.898	-275.601
0.0643	380.213	-273.502
0.06435	381.424	-278.25
0.0644	377.897	-272.323
0.06445	381.13	-275.752
0.0645	378.835	-272.679
0.06455	379.014	-272.647
0.0646	381.588	-275.427
0.06465	380.438	-274.627
0.0647	378.786	-274.394
0.06475	378.717	-270.532
0.0648	379.913	-272.978
0.06485	379.148	-274.033
0.0649	379.417	-274.347
0.06495	377.996	-273.55
0.065	379.146	-274.352
0.06505	379.105	-271.95
0.0651	378.587	-272.737
0.06515	379.958	-274.477
0.0652	379.698	-274.397
0.06525	379.335	-273.286
0.0653	378.534	-270.669
0.06535	380.519	-277.214
0.0654	378.751	-271.617
0.06545	379.32	-275.295
0.0655	380.489	-273.339
0.06555	378.598	-276.683
0.0656	379.65	-273.904
0.06565	379.054	-267.488
0.0657	379.153	-272.734
0.06575	379.04	-273.365
0.0658	380.996	-275.841
0.06585	378.584	-274.28
0.0659	378.921	-274.208
0.06595	378.894	-276.647
0.066	380.332	-273.655
0.06605	379.956	-269.928
0.0661	379.937	-272.824
0.06615	378.559	-274.227
0.0662	377.474	-272.972
0.06625	379.262	-272.803
0.0663	378.405	-272.485
0.06635	379.253	-274.03
0.0664	379.507	-275.969
0.06645	378.86	-275.285
0.0665	377.059	-275.733
0.06655	378.059	-272.894
0.0666	378.38	-275.164
0.06665	378.206	-267.757
0.0667	378.475	-276.328
0.06675	379.775	-274.426
0.0668	379.455	-275.374
0.06685	380.648	-275.679
0.0669	378.841	-270.759
0.06695	376.386	-267.25
0.067	381.023	-275.473
0.06705	380.165	-278.154
0.0671	378.588	-271.681
0.06715	379.347	-274.652
0.0672	380.043	-273.774
0.06725	379.712	-278.739
0.0673	378.503	-277.045
0.06735	380.091	-275.07
0.0674	381.566	-279.568
0.06745	378.284	-271.933
0.0675	377.301	-274.932
0.06755	379.521	-273.747
0.0676	378.545	-272.426
0.06765	379.409	-268.967
0.0677	379.62	-275.471
0.06775	380.699	-274.488
0.0678	375.939	-269.916
0.06785	381.129	-276.954
0.0679	377.551	-271.946
0.06795	378.798	-269.052
0.068	379.976	-274.897
0.06805	379.143	-267.923
0.0681	379.261	-274.857
0.06815	379.772	-275.186
0.0682	379.402	-271.49
0.06825	381.131	-275.184
0.0683	380.114	-278.96
0.06835	379.605	-269.875
0.0684	379.849	-276.403
0.06845	379.289	-277.638
0.0685	379.422	-278.048
0.06855	378.681	-272.743
0.0686	379.246	-272.957
0.06865	380.749	-275.395
0.0687	379.062	-275.85
0.06875	378.3	-273.949
0.0688	380.73	-273.587
0.06885	381.195	-278.706
0.0689	379.619	-274.869
0.06895	378.182	-273.105
0.069	379.363	-271.718
0.06905	379.421	-270.965
0.0691	379.605	-272.53
0.06915	378.712	-275.035
0.0692	378.682	-274.06
0.06925	379.587	-275.626
0.0693	380.157	-277.273
0.06935	380.58	-276.903
0.0694	378.328	-271.562
0.06945	379.075	-271.392
0.0695	380.714	-274.308
0.06955	377.083	-272.01
0.0696	377.567	-267.954
0.06965	378.7	-269.523
0.0697	379.749	-275.604
0.06975	378.857	-271.213
0.0698	377.946	-272.135
0.06985	377.552	-270.449
0.0699	379.263	-274.549
0.06995	378.814	-272.103
0.07	378.087	-272.287
0.07005	379.914	-273.497
0.0701	379.458	-275.136
0.07015	380.161	-275.049
0.0702	379.454	-272.884
0.07025	378.612	-273.399
0.0703	379.004	-273.33
0.07035	380.596	-275.189
0.0704	379.502	-272.603
0.07045	381.067	-272.25
0.0705	380.001	-271.886
0.07055	378.657	-269.8
0.0706	379.22	-273.91
0.07065	379.877	-272.291
0.0707	378.896	-275.679
0.07075	379.663	-275.556
0.0708	379.514	-273.852
0.07085	379.062	-276.958
0.0709	378.774	-276.34
0.07095	378.224	-273.922
0.071	377.975	-274.503
0.07105	378.812	-269.548
0.0711	380.136	-276.081
0.07115	379.523	-273.227
0.0712	377.388	-269.638
0.07125	379.054	-271.351
0.0713	375.629	-269.161
0.07135	378.309	-273.548
0.0714	377.716	-273.793
0.07145	378.913	-269.655
0.0715	377.735	-269.134
0.07155	380.873	-272.715
0.0716	378.908	-272.112
0.07165	378.224	-272.055
0.0717	380.07	-272.73
0.07175	380.237	-273.14
0.0718	379.146	-269.864
0.07185	378.927	-269.028
0.0719	379.435	-272.87
0.07195	379.718	-276.314
0.072	379.219	-269.657
0.07205	379.72	-274.028
0.0721	379.621	-275.698
0.07215	381.803	-272.218
0.0722	379.054	-273.485
0.07225	378.278	-269.009
0.0723	380.041	-272.489
0.07235	378.666	-274.689
0.0724	380.467	-276.04
0.07245	379.961	-275.809
0.0725	379.341	-274.892
0.07255	379.665	-277.469
0.0726	381.402	-275.248
0.07265	377.962	-272.595
0.0727	377.6	-272.548
0.07275	379.068	-277.943
0.0728	378.281	-275.459
0.07285	378.734	-270.77
0.0729	379.982	-275.189
0.07295	380.157	-276.647
0.073	381.318	-275.473
0.07305	379.411	-274.933
0.0731	378.667	-273.956
0.07315	379.062	-272.598
0.0732	379.746	-274.749
0.07325	379.642	-274.956
0.0733	379.256	-271.155
0.07335	377.735	-275.956
0.0734	381.097	-278.435
0.07345	377.936	-272.951
0.0735	380.781	-272.653
0.07355	381.341	-277.243
0.0736	380.914	-275.072
0.07365	380.265	-275.189
0.0737	380.424	-269.615
0.07375	380.744	-273.58
0.0738	379.663	-276.793
0.07385	381.784	-275.049
0.0739	381.691	-275.96
0.07395	379.613	-271.812
0.074	379.933	-275.036
0.07405	379.955	-280.524
0.0741	378.519	-273.702
0.07415	380.377	-268.879
0.0742	381.31	-278.167
0.07425	381.177	-278.728
0.0743	379.641	-272.42
0.07435	379.559	-273.985
0.0744	379.612	-276.773
0.07445	381.232	-277.306
0.0745	381.697	-275.805
0.07455	381.034	-275.507
0.0746	379.854	-273.816
0.07465	378.868	-271.015
0.0747	377.77	-273.283
0.07475	380.836	-275.055
0.0748	380.748	-280.603
0.07485	378.622	-273.564
0.0749	379.847	-272.504
0.07495	378.661	-276.628
0.075	381.477	-273.376
0.07505	379.998	-271.983
0.0751	380.644	-272.712
0.07515	380.604	-274.96
0.0752	379.781	-275.36
0.07525	379.111	-272.676
0.0753	381.643	-279.536
0.07535	380.427	-271.006
0.0754	380.454	-276.507
0.07545	380.161	-278.679
0.0755	381.641	-277.848
0.07555	379.445	-278.923
0.0756	379.791	-270.37
0.07565	379.032	-280.458
0.0757	379.428	-273.278
0.07575	381.315	-281.108
0.0758	377.748	-268.617
0.07585	379.811	-276.747
0.0759	380.129	-273.313
0.07595	380.155	-274.746
0.076	379.357	-273.451
0.07605	380.159	-275.396
0.0761	379.942	-278.712
0.07615	379.367	-273.005
0.0762	380.104	-272.127
0.07625	379.136	-271.366
0.0763	379.434	-274.386
0.07635	378.866	-273.063
0.0764	378.051	-270.015
0.07645	379.803	-273.344
0.0765	377.619	-268.81
0.07655	378.776	-276.625
0.0766	380.043	-270.987
0.07665	378.935	-276.591
0.0767	381.123	-276.579
0.07675	379.03	-271.66
0.0768	378.299	-272.226
0.07685	378.879	-272.766
0.0769	378.426	-273.551
0.07695	379.566	-273.767
0.077	379.383	-272.317
0.07705	379.921	-276.999
0.0771	380.004	-274.33
0.07715	379.461	-281.316
0.0772	380.89	-276.845
0.07725	380.177	-277.15
0.0773	379.696	-272.224
0.07735	377.41	-271.774
0.0774	380.524	-273.493
0.07745	379.838	-272.812
0.0775	378.604	-271.572
0.07755	380.582	-275.548
0.0776	378.385	-273.51
0.07765	378.807	-277.055
0.0777	379.878	-273.871
0.07775	378.734	-272.245
0.0778	379.222	-278.145
0.07785	378.816	-274.802
0.0779	380.852	-275.637
0.07795	379.712	-275.365
0.078	378.656	-273.181
0.07805	378.486	-268.905
0.0781	378.705	-273.006
0.07815	378.491	-274.137
0.0782	380.078	-275.371
0.07825	378.611	-273.47
0.0783	378.883	-268.763
0.07835	378.529	-266.901
0.0784	380.627	-275.005
0.07845	378.806	-272.455
0.0785	379.059	-276.699
0.07855	379.432	-272.884
0.0786	380.839	-275.398
0.07865	380.405	-269.929
0.0787	379.647	-273.725
0.07875	381.186	-278.924
0.0788	379.84	-274.511
0.07885	379.364	-278.37
0.0789	377.223	-274.063
0.07895	378.247	-274.008
0.079	378.769	-272.456
0.07905	378.378	-270.179
0.0791	377.7	-272.839
0.07915	378.674	-269.294
0.0792	379.434	-275.419
0.07925	380.399	-276.611
0.0793	378.809	-274.861
0.07935	379.084	-275.512
0.0794	380.492	-275.059
0.07945	379.017	-275.705
0.0795	378.494	-275.229
0.07955	376.769	-272.699
0.0796	379.762	-274.9
0.07965	379.282	-272.618
0.0797	378.548	-276.824
0.07975	380.498	-275.095
0.0798	379.277	-275.147
0.07985	379.619	-278.24
0.0799	379.431	-269.96
0.07995	379.715	-278.912
0.08	378.904	-273.02
0.08005	379.825	-278.653
0.0801	380.129	-277.044
0.08015	380.255	-273.833
0.0802	378.466	-268.333
0.08025	379.107	-272.043
0.0803	380.841	-273.675
0.08035	380.324	-276.346
0.0804	381.366	-272.698
0.08045	379.87	-273.936
0.0805	379.827	-272.871
0.08055	380.181	-274.788
0.0806	381.34	-272.871
0.08065	378.586	-274.462
0.0807	379.21	-269.699
0.08075	380.689	-276.111
0.0808	380.862	-275.96
0.08085	379.58	-273.372
0.0809	379.308	-274.33
0.08095	379.744	-277.692
0.081	379.552	-280.358
0.08105	378.859	-271.963
0.0811	379.379	-273.67
0.08115	380.627	-272.907
0.0812	379.362	-277.503
0.08125	378.14	-269.075
0.0813	378.053	-271.96
0.08135	378.594	-276.006
0.0814	379.931	-276.827
0.08145	378.224	-269.079
0.0815	381.481	-273.734
0.08155	379.768	-277.286
0.0816	380.525	-277.423
0.08165	378.634	-277.221
0.0817	380.07	-272.032
0.08175	379.487	-275.098
0.0818	378.573	-271.29
0.08185	377.027	-270.75
0.0819	381.519	-277.846
0.08195	380.115	-274.602
0.082	381.446	-278.857
0.08205	380.213	-276.017
0.0821	380.589	-279.702
0.08215	380.456	-277.41
0.0822	379.98	-276.769
0.08225	380.671	-275.316
0.0823	378.394	-272.482
0.08235	380.483	-272.879
0.0824	378.386	-270.247
0.08245	377.7	-268.467
0.0825	379.525	-279.6
0.08255	379.975	-270.729
0.0826	380.323	-279.026
0.08265	378.507	-274.594
0.0827	379.082	-276.997
0.08275	380.004	-272.671
0.0828	380.15	-274.939
0.08285	378.662	-276.048
0.0829	378.973	-275.388
0.08295	379.101	-274.162
0.083	380.066	-274.508
0.08305	378.576	-273.42
0.0831	379.238	-276.944
0.08315	379.683	-273.709
0.0832	380.674	-274.716
0.08325	379.483	-275.9
0.0833	378.992	-276.365
0.08335	378.314	-269.529
0.0834	377.929	-273.951
0.08345	379.406	-274.118
0.0835	379.168	-270.012
0.08355	379.807	-273.945
0.0836	380.439	-277.132
0.08365	381.196	-272.128
0.0837	377.678	-271.63
0.08375	379.591	-273.733
0.0838	380.684	-275.524
0.08385	380.413	-275.157
0.0839	379.398	-273.57
0.08395	379.172	-276.858
0.084	378.631	-275.516
0.08405	379.567	-275.393
0.0841	379.422	-276.634
0.08415	380.915	-277.862
0.0842	379.181	-277.284
0.08425	380.334	-275.392
0.0843	379.743	-275.676
0.08435	378.864	-273.404
0.0844	379.769	-276.272
0.08445	378.271	-269.563
0.0845	380.342	-275.887
0.08455	379.057	-270.523
0.0846	378.65	-276.654
0.08465	378.486	-271.893
0.0847	379.843	-274.042
0.08475	378.922	-271.161
0.0848	379.292	-271.381
0.08485	378.887	-276.167
0.0849	378.32	-277.291
0.08495	377.959	-271.021
0.085	378.926	-274.522
0.08505	377.318	-277.249
0.0851	379.269	-276.779
0.08515	376.19	-270.767
0.0852	378.521	-275.14
0.08525	379.377	-276.449
0.0853	379.064	-274.475
0.08535	379.294	-276.707
0.0854	377.827	-273.577
0.08545	380.687	-278.119
0.0855	378.17	-273.046
0.08555	378.071	-272.795
0.0856	379.983	-274.802
0.08565	377.593	-270.708
0.0857	379.437	-275.962
0.08575	378.045	-270.896
0.0858	378.343	-272.348
0.08585	378.93	-278.068
0.0859	377.371	-276.001
0.08595	378.03	-269.878
0.086	378.125	-272.281
0.08605	379.628	-275.07
0.0861	378.26	-273.064
0.08615	378.592	-271.953
0.0862	378.766	-274.032
0.08625	379.037	-274.261
0.0863	379.067	-276.73
0.08635	379.921	-277.526
0.0864	378.298	-275.663
0.08645	379.502	-276.645
0.0865	380.341	-275.142
0.08655	378.811	-274.252
0.0866	380.418	-279.095
0.08665	378.551	-276.921
0.0867	379.626	-274.699
0.08675	379.394	-276.616
0.0868	378.668	-276.016
0.08685	378.287	-272.282
0.0869	379.601	-275.839
0.08695	378.742	-271.398
0.087	378.292	-273.77
0.08705	379.573	-275.746
0.0871	379.816	-269.92
0.08715	378.892	-275.597
0.0872	379.514	-273.544
0.08725	380.749	-272.236
0.0873	379.516	-275.743
0.08735	381.195	-276.928
0.0874	379.632	-275.553
0.08745	380.525	-274.576
0.0875	378.562	-273.568
0.08755	379.874	-274.599
0.0876	378.786	-275.603
0.08765	379.074	-272.455
0.0877	378.094	-273.749
0.08775	379.694	-272.628
0.0878	378.005	-270.126
0.08785	379.809	-272.753
0.0879	378.517	-271.764
0.08795	378.866	-275.2
0.088	378.535	-275.315
0.08805	377.883	-277.29
0.0881	380.026	-273.84
0.08815	379.83	-274.895
0.0882	378.909	-272.222
0.08825	378.137	-272.072
0.0883	378.905	-273.461
0.08835	378.293	-274.112
0.0884	378.997	-268.404
0.08845	378.345	-272.875
0.0885	380.064	-277.504
0.08855	379.159	-275.058
0.0886	380.867	-271.909
0.08865	379.847	-278.59
0.0887	380.168	-276.31
0.08875	377.66	-272.822
0.0888	381.134	-275.473
0.08885	378.813	-272.477
0.0889	378.625	-269.928
0.08895	379.942	-272.146
0.089	380.064	-273.683
0.08905	378.514	-273.731
0.0891	378.001	-269.327
0.08915	379.915	-277.142
0.0892	378.727	-271.415
0.08925	379.032	-273.013
0.0893	378.708	-273.83
0.08935	378.123	-275.078
0.0894	377.806	-272.035
0.08945	379.523	-276.413
0.0895	379.361	-275.867
0.08955	377.941	-268.093
0.0896	379.003	-274.651
0.08965	380.165	-280.559
0.0897	377.845	-272.024
0.08975	381.456	-276.182
0.0898	378.31	-276.773
0.08985	379.113	-277.089
0.0899	380.24	-275.581
0.08995	380.213	-274.318
0.09	378.444	-273.136
0.09005	380.333	-274.655
0.0901	379.408	-270.339
0.09015	378.725	-275.72
0.0902	379.375	-273.649
0.09025	378.366	-273.187
0.0903	380.151	-275.516
0.09035	379.379	-271.009
0.0904	378.943	-271.416
0.09045	378.864	-274.271
0.0905	380.345	-276.261
0.09055	381.061	-275.608
0.0906	381.371	-275.893
0.09065	378.126	-272.789
0.0907	381.195	-274.084
0.09075	379.185	-273.116
0.0908	379.471	-271.922
0.09085	378.939	-267.184
0.0909	378.671	-271.25
0.09095	380.155	-277.384
0.091	378.075	-273.839
0.09105	378.855	-274.515
0.0911	380.262	-273.132
0.09115	379.524	-272.549
0.0912	378.468	-273.525
0.09125	378.031	-272.811
0.0913	380.191	-275.306
0.09135	379.701	-268.268
0.0914	379.719	-273.86
0.09145	379.341	-271.88
0.0915	379.036	-274.549
0.09155	379.35	-276.03
0.0916	379.778	-275.089
0.09165	380.649	-275.51
0.0917	379.277	-273.611
0.09175	379.26	-275.516
0.0918	379.551	-273.408
0.09185	378.975	-275.971
0.0919	380.101	-271.65
0.09195	378.225	-273.179
0.092	380.229	-275.782
0.09205	379.475	-271.49
0.0921	379.417	-273.62
0.09215	377.913	-265.718
0.0922	380.385	-273.343
0.09225	380.173	-276.293
0.0923	379.295	-271.403
0.09235	380.567	-273.689
0.0924	379.155	-268.54
0.09245	380.505	-275.556
0.0925	378.84	-267.528
0.09255	380.726	-273.126
0.0926	379.291	-271.707
0.09265	379.132	-272.468
0.0927	378.014	-270.552
0.09275	378.758	-270.223
0.0928	378.252	-273.694
0.09285	378.125	-268.387
0.0929	380.433	-273.651
0.09295	379.884	-276.493
0.093	379.47	-268.453
0.09305	379.803	-277.102
0.0931	379.202	-276.999
0.09315	377.959	-270.442
0.0932	379.29	-271.176
0.09325	378.849	-272.479
0.0933	379.159	-275.814
0.09335	379.861	-271.712
0.0934	380.649	-272.557
0.09345	379.481	-273.877
0.0935	380.031	-274.092
0.09355	379.192	-274.671
0.0936	379.717	-272.52
0.09365	379.454	-270.139
0.0937	380.62	-272.056
0.09375	381.24	-275.374
0.0938	380.235	-271.675
0.09385	380.955	-275.767
0.0939	379.893	-276.66
0.09395	379.458	-271.318
0.094	379.843	-273.013
0.09405	379.626	-274.713
0.0941	380.884	-274.923
0.09415	380.847	-271.858
0.0942	379.33	-272.086
0.09425	380.074	-269.594
0.0943	378.13	-269.633
0.09435	378.937	-269.012
0.0944	379.788	-274.27
0.09445	379.055	-273.515
0.0945	379.234	-269.333
0.09455	378.699	-268.662
0.0946	378.064	-271.297
0.09465	379.777	-277.093
0.0947	379.961	-271.955
0.09475	378.23	-273.98
0.0948	378.89	-272.978
0.09485	377.531	-271.91
0.0949	379.541	-276.523
0.09495	379.622	-275.64
0.095	380.693	-276.509
0.09505	380.591	-272.403
0.0951	379.546	-274.951
0.09515	379.467	-275.125
0.0952	379.69	-277.849
0.09525	379.299	-272.282
0.0953	378.705	-273.138
0.09535	380.96	-276.177
0.0954	379.84	-276.551
0.09545	380.09	-273.36
0.0955	380.789	-276.869
0.09555	381.045	-275.502
0.0956	379.192	-274.986
0.09565	381.014	-277.791
0.0957	379.064	-273.494
0.09575	380.188	-273.195
0.0958	379.838	-276.763
0.09585	380.098	-274.868
0.0959	379.643	-274.408
0.09595	378.881	-273.809
0.096	379.171	-272.175
0.09605	379.818	-267.821
0.0961	381.599	-273.297
0.09615	381.177	-275.019
0.0962	380.248	-276.993
0.09625	378.261	-269.484
0.0963	380.635	-274.47
0.09635	379.258	-269.091
0.0964	377.688	-263.741
0.09645	378.892	-270.274
0.0965	378.837	-271.447
0.09655	379.073	-277.932
0.0966	380.646	-275.107
0.09665	378.381	-272.442
0.0967	379.541	-275.624
0.09675	379.709	-270.035
0.0968	381.161	-277.475
0.09685	379.758	-275.217
0.0969	377.869	-270.098
0.09695	377.517	-268.88
0.097	378.968	-271.904
0.09705	378.849	-269.362
0.0971	378.184	-270.944
0.09715	379.656	-272.396
0.0972	378.751	-276.937
0.09725	378.104	-271.121
0.0973	378.156	-273.854
0.09735	378.324	-272.989
0.0974	377.694	-268.48
0.09745	379.373	-272.471
0.0975	378.169	-273.124
0.09755	378.206	-274.148
0.0976	377.867	-276.637
0.09765	378.743	-275.541
0.0977	379.418	-272.03
0.09775	377.832	-272.6
0.0978	378.889	-272.212
0.09785	379.304	-273.073
0.0979	380.554	-274.926
0.09795	377.795	-270.352
0.098	378.846	-273.674
0.09805	379.064	-276.382
0.0981	379.857	-278.188
0.09815	379.446	-279.002
0.0982	379.534	-275.487
0.09825	378.767	-270.96
0.0983	380.846	-278.76
0.09835	381.182	-277.162
0.0984	382.13	-276.177
0.09845	379.642	-270.269
0.0985	379.078	-272.92
0.09855	379.322	-272.02
0.0986	379.894	-273.841
0.09865	380.111	-273.455
0.0987	379.248	-264.859
0.09875	379.424	-272.851
0.0988	380.465	-271.386
0.09885	381.955	-276.124
0.0989	380.961	-276.799
0.09895	379.614	-275.905
0.099	378.976	-269.896
0.09905	378.963	-272.412
0.0991	380.159	-276.148
0.09915	381.567	-281.045
0.0992	379.637	-278.174
0.09925	380.664	-274.434
0.0993	381.416	-278.998
0.09935	379.668	-271.839
0.0994	379.454	-271.552
0.09945	378.92	-275.624
0.0995	378.615	-270.391
0.09955	379.109	-276.13
0.0996	379.153	-272.809
0.09965	379.167	-275.775
0.0997	380.478	-275.605
0.09975	378.676	-276.843
[truncated: 201,715+ more rows]

## Sheet: G12 1mM
Dark-field trace				Fig.6-suppl 1A
E236A-WT/55 G12		1mM ATP
20000 fps
time	X-axis	Y-axis
0	38.5023	-359.93
5e-05	34.9587	-360.192
0.0001	37.7859	-360.752
0.00015	35.6869	-363.456
0.0002	39.6373	-363.184
0.00025	39.1294	-360.647
0.0003	37.7214	-359.156
0.00035	37.6812	-360.554
0.0004	39.2696	-357.466
0.00045	41.2678	-361.875
0.0005	39.0567	-358.687
0.00055	35.3995	-359.69
0.0006	37.7121	-360.195
0.00065	37.0056	-360.067
0.0007	36.8588	-359.794
0.00075	39.0709	-359.544
0.0008	39.2519	-358.378
0.00085	38.0045	-362.301
0.0009	34.3252	-357.674
0.00095	34.9511	-359.54
0.001	42.5904	-358.002
0.00105	33.5551	-357.323
0.0011	34.0229	-357.691
0.00115	37.6472	-358.054
0.0012	32.8287	-360.548
0.00125	35.0478	-355.781
0.0013	37.0024	-360.481
0.00135	36.7925	-360.18
0.0014	40.0125	-359.461
0.00145	37.229	-357.749
0.0015	37.4991	-361.976
0.00155	41.326	-360.572
0.0016	37.8434	-359.985
0.00165	36.3134	-362.554
0.0017	35.1846	-365.505
0.00175	37.0261	-361.584
0.0018	36.9969	-358.066
0.00185	38.4753	-359.047
0.0019	39.066	-357.618
0.00195	37.7876	-357.935
0.002	34.9037	-359.148
0.00205	37.9234	-356.914
0.0021	38.5222	-356.535
0.00215	36.9606	-360.99
0.0022	33.8156	-362.101
0.00225	37.4329	-356.575
0.0023	35.6194	-360.773
0.00235	37.9457	-360.96
0.0024	35.9509	-359.537
0.00245	38.1893	-355.877
0.0025	35.8183	-357.024
0.00255	38.0316	-359.236
0.0026	35.269	-358.137
0.00265	34.1367	-360.507
0.0027	33.1301	-359.464
0.00275	33.73	-358.464
0.0028	33.9444	-357.747
0.00285	32.6471	-361.399
0.0029	33.386	-358.333
0.00295	38.893	-360.624
0.003	38.2968	-360.813
0.00305	39.3965	-362.997
0.0031	39.5275	-359.969
0.00315	37.3183	-360.791
0.0032	36.8463	-357.473
0.00325	35.2633	-357.342
0.0033	36.8865	-357.878
0.00335	37.751	-359.037
0.0034	36.4277	-355.78
0.00345	34.9851	-356.767
0.0035	31.9985	-360.876
0.00355	34.8706	-355.968
0.0036	33.2324	-358.683
0.00365	36.3242	-355.678
0.0037	32.3775	-360.972
0.00375	31.6561	-358.165
0.0038	33.4534	-358.789
0.00385	38.0298	-357.846
0.0039	33.7062	-358.139
0.00395	33.404	-355.795
0.004	36.7762	-360.699
0.00405	36.9373	-359.458
0.0041	35.0484	-357.634
0.00415	35.809	-358.336
0.0042	36.9795	-359.448
0.00425	34.2111	-359.799
0.0043	37.395	-360.334
0.00435	35.7177	-361.768
0.0044	34.8984	-360.791
0.00445	36.2569	-358.314
0.0045	37.4094	-359.875
0.00455	37.0911	-359.52
0.0046	40.705	-357.904
0.00465	38.456	-358.725
0.0047	38.5761	-361.695
0.00475	41.7032	-361.851
0.0048	35.1918	-360.6
0.00485	36.55	-358.32
0.0049	37.2179	-356.397
0.00495	34.7416	-357.663
0.005	33.9379	-360.556
0.00505	36.0212	-360.918
0.0051	34.2264	-362.055
0.00515	36.8778	-358.682
0.0052	36.6903	-357.161
0.00525	37.8731	-358.306
0.0053	38.8013	-358.594
0.00535	39.0064	-359.144
0.0054	38.43	-359.452
0.00545	36.6923	-358.782
0.0055	39.4015	-362.781
0.00555	37.7366	-359.803
0.0056	41.3864	-361.379
0.00565	38.6367	-360.518
0.0057	41.6445	-359.833
0.00575	41.7283	-361.569
0.0058	37.2449	-362.235
0.00585	38.7215	-360.177
0.0059	40.2828	-355.521
0.00595	40.2485	-357.159
0.006	37.6101	-357.904
0.00605	36.759	-360.368
0.0061	35.5155	-358.17
0.00615	39.1025	-361.584
0.0062	39.2932	-360.019
0.00625	36.7224	-361.69
0.0063	36.5143	-359.99
0.00635	36.221	-360.167
0.0064	42.3556	-359.001
0.00645	31.8345	-360.038
0.0065	39.2864	-361.955
0.00655	32.3316	-359.994
0.0066	33.8478	-357.253
0.00665	34.3694	-361.53
0.0067	37.5508	-362.793
0.00675	30.9733	-360.472
0.0068	34.4042	-358.301
0.00685	36.0996	-362.12
0.0069	36.7057	-362.022
0.00695	35.058	-360.111
0.007	37.2444	-359.006
0.00705	38.0371	-357.979
0.0071	33.8036	-357.486
0.00715	36.9487	-360.152
0.0072	39.033	-356.59
0.00725	36.3443	-358.638
0.0073	34.6214	-359.036
0.00735	32.9015	-360.123
0.0074	33.7171	-359.942
0.00745	35.0647	-355.795
0.0075	37.4361	-360.343
0.00755	34.5984	-358.108
0.0076	33.9399	-357.117
0.00765	33.9714	-360.134
0.0077	37.268	-360.866
0.00775	34.3389	-356.351
0.0078	33.9471	-357.331
0.00785	36.2398	-357.694
0.0079	35.7939	-358.492
0.00795	36.4875	-357.327
0.008	35.9123	-357.671
0.00805	32.5177	-360.984
0.0081	33.7026	-359.538
0.00815	35.3465	-362.613
0.0082	33.7625	-361.436
0.00825	36.2599	-359.695
0.0083	36.0336	-358.268
0.00835	35.0331	-357.162
0.0084	35.7417	-355.466
0.00845	35.1933	-354.361
0.0085	31.8988	-357.851
0.00855	33.6269	-358.837
0.0086	37.0786	-354.191
0.00865	35.267	-358.26
0.0087	38.0005	-358.022
0.00875	34.0669	-357.949
0.0088	32.4141	-358.675
0.00885	33.7332	-359.023
0.0089	37.8634	-361.229
0.00895	38.5717	-360.415
0.009	38.9987	-359.842
0.00905	40.8673	-361.895
0.0091	42.598	-360.177
0.00915	36.3967	-360.525
0.0092	34.2316	-361.733
0.00925	36.1603	-360.873
0.0093	37.0261	-360.024
0.00935	39.9422	-361.921
0.0094	37.0875	-358.693
0.00945	36.4357	-357.218
0.0095	37.2708	-357.801
0.00955	35.18	-360.736
0.0096	39.6025	-351.879
0.00965	37.1159	-355.507
0.0097	35.3049	-355.684
0.00975	35.8574	-356.037
0.0098	38.6976	-357.507
0.00985	35.1395	-359.004
0.0099	36.6787	-357.406
0.00995	37.5375	-355.428
0.01	38.029	-358.216
0.01005	38.0106	-359.525
0.0101	35.6559	-357.602
0.01015	36.2698	-356.745
0.0102	32.2163	-359.64
0.01025	35.1746	-355.904
0.0103	38.1347	-356.986
0.01035	40.8183	-356.977
0.0104	35.4658	-355.262
0.01045	38.0294	-356.134
0.0105	36.4426	-360.508
0.01055	37.0321	-360.126
0.0106	44.269	-358.795
0.01065	40.3743	-364.354
0.0107	41.7251	-358.529
0.01075	36.3608	-358.527
0.0108	36.8618	-359.137
0.01085	38.3303	-362.623
0.0109	40.5184	-363.296
0.01095	35.9037	-359.477
0.011	37.7649	-359.064
0.01105	33.2365	-360.162
0.0111	33.796	-359.835
0.01115	33.1769	-361.196
0.0112	36.7617	-361.888
0.01125	34.5646	-357.387
0.0113	38.0302	-358.748
0.01135	36.7725	-360.443
0.0114	36.6911	-356.382
0.01145	37.4417	-358.421
0.0115	40.2907	-361.697
0.01155	38.9754	-363.599
0.0116	35.8581	-360.725
0.01165	35.8805	-357.533
0.0117	34.6776	-361.469
0.01175	36.591	-356.662
0.0118	35.1224	-355.665
0.01185	38.0815	-358.135
0.0119	35.5858	-356.448
0.01195	36.0633	-358.844
0.012	34.8953	-358.353
0.01205	41.1613	-356.643
0.0121	41.537	-357.529
0.01215	37.7139	-359.466
0.0122	34.6959	-358.935
0.01225	40.1659	-356.844
0.0123	35.995	-359.997
0.01235	34.2511	-359.889
0.0124	37.5802	-356.166
0.01245	33.5956	-360.273
0.0125	33.3074	-363.213
0.01255	40.1895	-361.799
0.0126	35.2397	-358.576
0.01265	35.2946	-357.059
0.0127	36.5913	-354.999
0.01275	37.2791	-356.551
0.0128	36.3529	-357.892
0.01285	33.749	-359.175
0.0129	41.7301	-356.464
0.01295	39.1172	-355.936
0.013	36.594	-357.413
0.01305	35.8906	-358.617
0.0131	36.8665	-358.345
0.01315	33.6939	-361.132
0.0132	37.3417	-360.184
0.01325	38.4452	-362.244
0.0133	37.1377	-361.996
0.01335	39.7062	-360.951
0.0134	38.9398	-361.063
0.01345	39.1153	-362.017
0.0135	37.6656	-361.355
0.01355	35.3393	-363.063
0.0136	38.9915	-361.051
0.01365	37.1346	-359.982
0.0137	39.4908	-364.862
0.01375	41.9751	-357.193
0.0138	37.3431	-357.773
0.01385	33.9503	-358.338
0.0139	38.225	-355.677
0.01395	37.9644	-357.307
0.014	38.8961	-356.793
0.01405	37.3288	-358.823
0.0141	38.7589	-356.285
0.01415	37.2412	-356.614
0.0142	37.1477	-356.391
0.01425	40.7814	-358.023
0.0143	37.5394	-357.218
0.01435	34.3718	-356.494
0.0144	36.2852	-355.712
0.01445	36.5958	-356.425
0.0145	34.5115	-360.284
0.01455	40.4121	-360.007
0.0146	35.2539	-357.373
0.01465	34.1944	-357.145
0.0147	38.7579	-358.877
0.01475	35.8041	-356.073
0.0148	35.9651	-355.881
0.01485	33.8804	-361.307
0.0149	35.4023	-360.204
0.01495	37.4288	-358.208
0.015	33.2476	-360.939
0.01505	34.4022	-360.2
0.0151	35.7515	-356.929
0.01515	39.9581	-356.451
0.0152	39.8187	-359.88
0.01525	34.0138	-360.311
0.0153	34.9567	-360.69
0.01535	35.4627	-359.784
0.0154	32.9121	-357.259
0.01545	37.4961	-357.894
0.0155	37.027	-355.92
0.01555	37.7132	-359.964
0.0156	39.5393	-358.537
0.01565	34.9147	-358.422
0.0157	35.6713	-360.747
0.01575	36.9145	-359.515
0.0158	38.381	-356.579
0.01585	36.6944	-356.47
0.0159	35.7163	-358.099
0.01595	37.7927	-359.313
0.016	37.2468	-361.677
0.01605	34.2122	-359.785
0.0161	38.849	-364.17
0.01615	37.1655	-363.083
0.0162	37.3368	-358.451
0.01625	37.54	-357.757
0.0163	36.3068	-357.598
0.01635	39.6625	-359.51
0.0164	38.3204	-357.166
0.01645	35.2306	-357.401
0.0165	38.2509	-356.98
0.01655	37.7706	-355.734
0.0166	36.8273	-357.712
0.01665	36.7424	-358.379
0.0167	34.2391	-357.088
0.01675	35.9043	-358.799
0.0168	35.3297	-358.265
0.01685	34.0136	-361.468
0.0169	35.4441	-356.098
0.01695	33.8197	-361.799
0.017	36.9027	-361.015
0.01705	36.7503	-355.007
0.0171	38.0976	-360.382
0.01715	38.734	-363.033
0.0172	38.3847	-363.334
0.01725	38.1533	-357.706
0.0173	34.9348	-357.563
0.01735	36.7066	-359.149
0.0174	37.2503	-357.824
0.01745	37.3497	-356.467
0.0175	34.2995	-356.823
0.01755	34.9712	-354.359
0.0176	33.7611	-356.764
0.01765	37.2348	-357.899
0.0177	33.2774	-357.591
0.01775	32.8565	-358.937
0.0178	39.6704	-360.454
0.01785	39.4233	-359.193
0.0179	37.4932	-360.8
0.01795	36.1026	-359.068
0.018	32.0926	-362.433
0.01805	35.7059	-358.005
0.0181	36.7188	-359.257
0.01815	37.1891	-357.634
0.0182	33.9285	-359.566
0.01825	36.6972	-359.929
0.0183	35.1497	-364.762
0.01835	36.4151	-359.386
0.0184	33.6125	-361.492
0.01845	35.3136	-362.824
0.0185	37.9978	-361.324
0.01855	37.6566	-359.249
0.0186	40.215	-361.507
0.01865	37.1372	-362.912
0.0187	37.3853	-362.18
0.01875	38.5697	-362.301
0.0188	39.9576	-360.721
0.01885	39.1079	-360.157
0.0189	34.8566	-359.446
0.01895	38.2447	-362.12
0.019	41.9324	-360.686
0.01905	39.0669	-359.75
0.0191	37.0392	-360.351
0.01915	40.6887	-361.81
0.0192	34.3764	-362.15
0.01925	36.5098	-361.919
0.0193	36.7395	-359.63
0.01935	35.4138	-359.771
0.0194	35.2639	-358.863
0.01945	40.7567	-360.357
0.0195	38.4046	-361.586
0.01955	37.2575	-359.879
0.0196	38.7457	-359.95
0.01965	41.3605	-359.579
0.0197	36.2191	-357.986
0.01975	31.121	-360.344
0.0198	34.9747	-359.571
0.01985	34.6718	-358.643
0.0199	35.4321	-358.327
0.01995	31.0715	-361.875
0.02	32.1164	-358.509
0.02005	29.8307	-358.694
0.0201	34.0034	-361.666
0.02015	38.1068	-360.672
0.0202	37.3145	-360.623
0.02025	36.6055	-362.57
0.0203	35.7131	-364.507
0.02035	37.122	-362.111
0.0204	35.3887	-361.801
0.02045	33.6634	-362.4
0.0205	37.5974	-361.5
0.02055	34.2608	-361.882
0.0206	36.2296	-364.118
0.02065	34.0419	-363.353
0.0207	34.6114	-361.708
0.02075	38.4043	-360.913
0.0208	35.9653	-361.838
0.02085	36.895	-361.628
0.0209	32.4981	-362.084
0.02095	38.7722	-362.21
0.021	36.1245	-361.493
0.02105	30.0736	-360.69
0.0211	36.6071	-362.486
0.02115	37.4697	-363.032
0.0212	32.7707	-360.299
0.02125	36.0304	-366.018
0.0213	36.6423	-362.142
0.02135	37.9485	-359.817
0.0214	39.7307	-357.757
0.02145	35.7751	-360.963
0.0215	35.9517	-361.926
0.02155	33.2102	-358.717
0.0216	33.5482	-362.513
0.02165	36.1291	-358.47
0.0217	35.0129	-359.822
0.02175	32.7973	-359.603
0.0218	36.0082	-361.38
0.02185	38.0017	-358.624
0.0219	38.1806	-362.045
0.02195	41.4742	-360.348
0.022	40.6298	-358.635
0.02205	38.0995	-356.003
0.0221	36.7305	-360.479
0.02215	35.6401	-358.612
0.0222	34.6133	-358.719
0.02225	32.3619	-360.481
0.0223	30.2525	-361.207
0.02235	34.2634	-358.439
0.0224	36.8107	-358.149
0.02245	35.9327	-359.377
0.0225	30.6393	-359.478
0.02255	34.0336	-361.152
0.0226	37.2449	-360.708
0.02265	35.0593	-357.245
0.0227	33.2937	-358.039
0.02275	35.7806	-363.475
0.0228	35.308	-358.577
0.02285	31.039	-359.529
0.0229	31.5352	-362.363
0.02295	34.0406	-359.612
0.023	32.7745	-358.203
0.02305	35.6056	-356.721
0.0231	33	-364.317
0.02315	39.3235	-357.446
0.0232	39.4518	-359.52
0.02325	42.4166	-363.289
0.0233	38.2701	-360.116
0.02335	37.1914	-359.004
0.0234	32.811	-363.02
0.02345	38.8926	-359.638
0.0235	41.1646	-360.658
0.02355	31.2533	-357.721
0.0236	35.813	-360.45
0.02365	36.8066	-358.908
0.0237	36.1583	-360.608
0.02375	41.5001	-360.88
0.0238	38.1356	-361.948
0.02385	36.4245	-363.59
0.0239	40.3508	-361.935
0.02395	36.8196	-358.874
0.024	36.2526	-359.652
0.02405	41.2352	-359.714
0.0241	37.7611	-360.973
0.02415	34.2182	-358.833
0.0242	32.7882	-365.27
0.02425	37.6742	-361.846
0.0243	35.3363	-356.9
0.02435	35.2517	-358.37
0.0244	35.0147	-362.571
0.02445	34.6927	-357.358
0.0245	37.5232	-362.239
0.02455	36.4538	-361.167
0.0246	38.5915	-359.8
0.02465	35.6895	-358.222
0.0247	42.798	-359.396
0.02475	42.7838	-365.454
0.0248	38.8148	-364.73
0.02485	38.1952	-361.676
0.0249	37.6192	-363.149
0.02495	38.4213	-361.405
0.025	34.0232	-360.795
0.02505	37.5093	-359.596
0.0251	37.2233	-361.802
0.02515	33.6222	-361.453
0.0252	37.5576	-360.278
0.02525	42.1396	-363.607
0.0253	36.6441	-364.37
0.02535	39.7951	-363.7
0.0254	37.409	-358.949
0.02545	36.5481	-360.635
0.0255	36.1316	-358.731
0.02555	34.9403	-360.097
0.0256	32.7518	-360.696
0.02565	38.6793	-357.138
0.0257	38.2608	-357.237
0.02575	37.736	-364.318
0.0258	38.9587	-359.935
0.02585	38.8523	-361.518
0.0259	41.016	-360.837
0.02595	39.9048	-359.955
0.026	39.017	-362.524
0.02605	38.729	-359.098
0.0261	38.356	-359.288
0.02615	37.0458	-359.388
0.0262	37.2115	-361.276
0.02625	35.6827	-362.153
0.0263	42.0016	-361.74
0.02635	40.57	-360.369
0.0264	40.2991	-359.88
0.02645	37.2114	-359.159
0.0265	36.0581	-359.953
0.02655	38.2822	-361.77
0.0266	38.7546	-360.487
0.02665	37.3605	-358.978
0.0267	35.3859	-362.247
0.02675	34.8507	-357.229
0.0268	34.4943	-359.374
0.02685	36.63	-361.385
0.0269	39.5587	-362.253
0.02695	38.7379	-359.521
0.027	40.1125	-361.675
0.02705	37.9667	-360.074
0.0271	35.4586	-359.552
0.02715	37.9908	-359.806
0.0272	34.6816	-358.436
0.02725	34.14	-358.951
0.0273	35.7888	-353.553
0.02735	31.9148	-359.053
0.0274	37.5658	-359.94
0.02745	39.7775	-361.097
0.0275	33.9079	-359.022
0.02755	34.0867	-362.816
0.0276	35.7035	-361.305
0.02765	37.0728	-358.422
0.0277	35.7913	-362.579
0.02775	36.2893	-360.844
0.0278	36.3605	-359.836
0.02785	36.2742	-362.284
0.0279	35.8974	-359.085
0.02795	35.8495	-358.426
0.028	33.5737	-358.387
0.02805	37.4164	-359.226
0.0281	37.909	-357.286
0.02815	34.3255	-357.438
0.0282	35.0839	-360.562
0.02825	40.7724	-359.844
0.0283	40.9613	-358.593
0.02835	41.1191	-360.238
0.0284	37.9564	-360.079
0.02845	40.1936	-358.538
0.0285	35.7555	-356.04
0.02855	32.9433	-360.56
0.0286	34.2951	-358.461
0.02865	33.9578	-355.814
0.0287	34.2835	-358.099
0.02875	33.7351	-360.899
0.0288	34.1193	-359.007
0.02885	35.748	-357.264
0.0289	35.1315	-358.94
0.02895	37.2015	-359.082
0.029	32.6796	-359.128
0.02905	34.8382	-359.441
0.0291	37.163	-358.137
0.02915	39.5573	-355.857
0.0292	38.5899	-359.383
0.02925	38.8208	-359.373
0.0293	34.7808	-356.965
0.02935	35.7619	-358.752
0.0294	36.6819	-356.444
0.02945	36.9771	-358.654
0.0295	37.0848	-358.157
0.02955	36.9157	-357.277
0.0296	36.9082	-357.82
0.02965	32.2597	-359.872
0.0297	35.6513	-359.929
0.02975	38.7122	-359.48
0.0298	35.7001	-362.313
0.02985	40.9828	-360.558
0.0299	39.8883	-361.538
0.02995	36.0392	-362.107
0.03	37.4476	-360.708
0.03005	34.6884	-365.45
0.0301	37.7451	-360.787
0.03015	40.8305	-362.368
0.0302	37.5912	-360.546
0.03025	37.725	-361.263
0.0303	37.3232	-361.879
0.03035	37.7022	-359.775
0.0304	39.1513	-362.119
0.03045	34.1886	-363.381
0.0305	37.6564	-362.662
0.03055	32.4074	-361.826
0.0306	34.4903	-359.531
0.03065	35.0218	-358.365
0.0307	33.2171	-362.105
0.03075	36.0109	-358.803
0.0308	35.4412	-357.034
0.03085	36.8722	-361.795
0.0309	32.6499	-359.317
0.03095	34.6913	-359.398
0.031	36.1086	-362.752
0.03105	36.3769	-363.479
0.0311	39.538	-360.026
0.03115	36.9843	-363.054
0.0312	35.6729	-362.637
0.03125	33.6099	-362.713
0.0313	36.3612	-362.796
0.03135	34.9593	-361.188
0.0314	33.192	-360.993
0.03145	31.0606	-355.493
0.0315	33.7538	-362.539
0.03155	37.0132	-360.797
0.0316	37.5609	-360.195
0.03165	33.7081	-360.781
0.0317	35.3928	-360.326
0.03175	36.2327	-359.214
0.0318	36.6252	-356.754
0.03185	37.0398	-358.956
0.0319	37.2246	-359.179
0.03195	35.8712	-360.289
0.032	34.0315	-359
0.03205	38.702	-360.154
0.0321	34.891	-359.34
0.03215	40.7551	-359.339
0.0322	37.8155	-361.827
0.03225	37.7972	-359.764
0.0323	32.2335	-362.76
0.03235	36.4774	-362.012
0.0324	39.2722	-355.092
0.03245	36.652	-356.676
0.0325	36.5857	-356.58
0.03255	34.0288	-360.131
0.0326	33.8818	-356.53
0.03265	36.3683	-355.779
0.0327	32.2263	-359.648
0.03275	34.6872	-358.766
0.0328	36.6101	-356.653
0.03285	34.5759	-359.832
0.0329	31.3046	-358.077
0.03295	36.119	-356.701
0.033	38.2537	-358.228
0.03305	35.6419	-358.749
0.0331	35.9268	-355.996
0.03315	35.0335	-360.443
0.0332	36.9416	-358.441
0.03325	35.6393	-363.21
0.0333	34.9962	-359.285
0.03335	36.2896	-359.5
0.0334	35.8014	-361.326
0.03345	37.3996	-360.65
0.0335	34.3239	-357.959
0.03355	31.4478	-359.75
0.0336	35.0813	-358.143
0.03365	32.9839	-360.336
0.0337	36.1222	-361.143
0.03375	33.3853	-361.375
0.0338	32.5751	-357.445
0.03385	37.5032	-360.062
0.0339	32.0212	-357.937
0.03395	34.93	-360.554
0.034	37.8815	-359.792
0.03405	38.4806	-355.784
0.0341	35.438	-355.094
0.03415	37.8781	-354.746
0.0342	36.3857	-357.033
0.03425	38.5447	-357.759
0.0343	36.8928	-359.51
0.03435	36.8429	-362.308
0.0344	36.6697	-359.026
0.03445	30.5255	-358.922
0.0345	35.0327	-359.013
0.03455	33.2498	-358.697
0.0346	37.0304	-362.867
0.03465	36.813	-359.642
0.0347	38.0912	-361.87
0.03475	38.5786	-358.212
0.0348	33.7416	-360.198
0.03485	33.4529	-360.642
0.0349	34.9917	-360.527
0.03495	37.5291	-358.647
0.035	35.0918	-361.507
0.03505	33.5834	-359.537
0.0351	30.9722	-358.328
0.03515	37.1223	-356.995
0.0352	34.8359	-360.969
0.03525	32.7303	-358.056
0.0353	35.7043	-361.692
0.03535	32.6098	-361.554
0.0354	31.2485	-358.293
0.03545	34.8948	-359.333
0.0355	36.3346	-359.748
0.03555	32.7466	-359.75
0.0356	30.2773	-356.361
0.03565	32.5005	-361.09
0.0357	37.6907	-359.541
0.03575	35.6177	-358.833
0.0358	35.7331	-358.52
0.03585	34.6783	-360.685
0.0359	34.737	-356.875
0.03595	38.4518	-360.218
0.036	40.1622	-362.303
0.03605	32.8998	-360.365
0.0361	38.4061	-357.213
0.03615	36.4358	-357.885
0.0362	36.716	-361.445
0.03625	40.3005	-357.167
0.0363	39.3138	-360.561
0.03635	36.1653	-360.915
0.0364	32.8921	-359.736
0.03645	35.0507	-357.275
0.0365	36.4819	-356.53
0.03655	36.9503	-360.155
0.0366	39.1823	-359.468
0.03665	41.2808	-357.289
0.0367	38.8057	-361.825
0.03675	37.787	-359.186
0.0368	39.3953	-358.719
0.03685	40.1532	-359.548
0.0369	36.5753	-359.967
0.03695	36.9326	-357.711
0.037	34.0002	-360.634
0.03705	32.5316	-358.029
0.0371	36.1628	-356.872
0.03715	31.3993	-356.658
0.0372	33.3193	-358.689
0.03725	34.7203	-359.465
0.0373	31.4587	-357.277
0.03735	36.2911	-361.932
0.0374	34.6124	-360.632
0.03745	30.0244	-357.878
0.0375	37.8422	-362.733
0.03755	39.0909	-359.142
0.0376	37.9229	-360.894
0.03765	34.5602	-362.277
0.0377	36.8662	-355.912
0.03775	36.5577	-355.394
0.0378	33.7737	-357.242
0.03785	33.2175	-358.356
0.0379	35.5578	-359.593
0.03795	33.001	-358.262
0.038	35.2433	-360.144
0.03805	39.3385	-358.833
0.0381	37.5746	-356.57
0.03815	37.2977	-354.548
0.0382	33.3583	-355.847
0.03825	32.9934	-357.788
0.0383	30.8015	-360.1
0.03835	31.7201	-357.652
0.0384	30.3039	-360.791
0.03845	28.9774	-358.983
0.0385	30.5017	-360.628
0.03855	40.3777	-359.466
0.0386	36.6133	-355.932
0.03865	36.7511	-361.708
0.0387	39.8169	-361.705
0.03875	34.3777	-362.947
0.0388	38.5286	-360.176
0.03885	36.1115	-357.174
0.0389	38.5447	-357.502
0.03895	36.6974	-357.748
0.039	36.472	-358.251
0.03905	35.8186	-358.831
0.0391	35.5393	-355.421
0.03915	34.0289	-358.549
0.0392	36.9907	-358.948
0.03925	34.9303	-355.554
0.0393	37.1665	-354.862
0.03935	34.1443	-360.925
0.0394	40.1084	-357.884
0.03945	35.1883	-359.906
0.0395	35.1143	-363.699
0.03955	37.895	-359.811
0.0396	35.9007	-358.546
0.03965	36.3781	-356.95
0.0397	37.9372	-359.001
0.03975	42.1788	-359.519
0.0398	38.9611	-358.844
0.03985	36.1021	-361.166
0.0399	36.1393	-355.813
0.03995	36.2684	-358.823
0.04	34.449	-358.457
0.04005	36.5463	-356.058
0.0401	38.8112	-354.104
0.04015	38.4945	-357.882
0.0402	35.6078	-359.169
0.04025	38.4926	-359.29
0.0403	37.9887	-358.173
0.04035	37.296	-358.413
0.0404	38.3612	-357.835
0.04045	36.9359	-359.144
0.0405	39.9697	-361.242
0.04055	42.1235	-361.205
0.0406	38.0045	-360.748
0.04065	33.9895	-361.594
0.0407	35.211	-360.298
0.04075	35.9453	-361.813
0.0408	37.8938	-361.804
0.04085	33.6387	-362.897
0.0409	34.0908	-358.142
0.04095	35.8245	-355.626
0.041	36.8933	-358.437
0.04105	35.728	-357.454
0.0411	34.5166	-356.969
0.04115	32.1258	-359.693
0.0412	38.0892	-357.843
0.04125	35.0104	-356.88
0.0413	31.2496	-359.935
0.04135	35.1868	-357.075
0.0414	34.4284	-356.165
0.04145	38.9254	-355.838
0.0415	39.2808	-358.236
0.04155	39.2034	-357.494
0.0416	38.0253	-359.063
0.04165	35.9553	-361.571
0.0417	37.5603	-359.379
0.04175	35.5831	-354.06
0.0418	33.7844	-360.187
0.04185	37.2048	-362.112
0.0419	36.1379	-359.736
0.04195	37.3111	-356.71
0.042	33.9621	-359.907
0.04205	33.6871	-356.124
0.0421	34.4574	-354.248
0.04215	37.4159	-360.007
0.0422	36.2441	-356.993
0.04225	34.9923	-357.881
0.0423	36.6973	-360.073
0.04235	36.2243	-359.848
0.0424	36.2431	-360.104
0.04245	40.9277	-358.815
0.0425	40.5059	-360.853
0.04255	37.155	-360.062
0.0426	38.222	-357.364
0.04265	35.2107	-360.596
0.0427	32.4002	-360.504
0.04275	37.6579	-354.938
0.0428	37.5419	-356.961
0.04285	38.7487	-359.084
0.0429	37.3425	-355.569
0.04295	38.2302	-359.14
0.043	39.4205	-358.27
0.04305	35.3225	-357.674
0.0431	34.7883	-354.921
0.04315	37.7762	-357.276
0.0432	39.8998	-360.623
0.04325	37.5567	-358.535
0.0433	36.6448	-360.413
0.04335	35.6822	-359.801
0.0434	37.5115	-356.028
0.04345	33.9936	-357.781
0.0435	37.6438	-358.401
0.04355	37.4046	-361.674
0.0436	38.2109	-357.822
0.04365	37.4288	-355.748
0.0437	36.502	-359.58
0.04375	36.4776	-358.068
0.0438	37.1849	-359.075
0.04385	35.8347	-359.12
0.0439	36.3451	-355.973
0.04395	30.4807	-358.622
0.044	35.8401	-357.173
0.04405	35.7222	-362.398
0.0441	31.5924	-358.308
0.04415	35.221	-358.944
0.0442	33.4315	-360.521
0.04425	32.111	-358.162
0.0443	39.982	-359.149
0.04435	35.7144	-361.5
0.0444	33.0856	-358.911
0.04445	34.3066	-357.384
0.0445	29.799	-359.629
0.04455	35.2374	-354.071
0.0446	35.2867	-358.321
0.04465	36.3976	-358.865
0.0447	34.7816	-360.343
0.04475	34.4687	-359.606
0.0448	36.1515	-359.651
0.04485	34.3646	-357.349
0.0449	31.0773	-357.392
0.04495	33.0112	-357.38
0.045	35.1899	-358.051
0.04505	36.1835	-355.934
0.0451	36.725	-356.541
0.04515	35.819	-359.447
0.0452	33.4416	-360.871
0.04525	39.949	-361.781
0.0453	32.2252	-362.596
0.04535	36.6383	-359.887
0.0454	35.356	-361.459
0.04545	37.338	-357.994
0.0455	34.7835	-357.335
0.04555	34.4371	-356.68
0.0456	36.8448	-354.593
0.04565	37.7476	-361.409
0.0457	37.4194	-357.749
0.04575	32.944	-358.514
0.0458	33.4015	-360.931
0.04585	32.2037	-360.691
0.0459	32.0772	-357.387
0.04595	34.8222	-360.099
0.046	36.4757	-360.01
0.04605	30.9905	-359.503
0.0461	36.4618	-358.84
0.04615	36.1365	-361.136
0.0462	34.7187	-361.152
0.04625	26.3972	-360.788
0.0463	35.3502	-358.267
0.04635	36.6708	-356.122
0.0464	34.112	-357.168
0.04645	37.7758	-356.046
0.0465	34.3201	-358.354
0.04655	32.5217	-359.269
0.0466	36.973	-355.841
0.04665	34.8485	-353.554
0.0467	37.5138	-359.001
0.04675	33.5079	-358.249
0.0468	33.0722	-358.808
0.04685	36.1904	-358.475
0.0469	35.3643	-354.25
0.04695	38.8331	-358.542
0.047	37.7927	-358.401
0.04705	35.5226	-357.778
0.0471	38.358	-357.879
0.04715	36.6008	-357.121
0.0472	33.636	-358.32
0.04725	31.8785	-355.412
0.0473	32.442	-356.874
0.04735	34.0503	-357.895
0.0474	35.7005	-358.374
0.04745	33.9487	-358.431
0.0475	36.0294	-358.364
0.04755	33.8768	-359.919
0.0476	35.6776	-358.475
0.04765	35.5641	-357.158
0.0477	35.5964	-362.038
0.04775	33.9221	-360.734
0.0478	33.666	-359.042
0.04785	36.4982	-356.677
0.0479	32.8997	-358.362
0.04795	35.49	-358.897
0.048	36.7115	-362.681
0.04805	36.6529	-362.036
0.0481	29.6528	-360.98
0.04815	36.0737	-363.031
0.0482	34.6106	-356.657
0.04825	30.7968	-357.512
0.0483	35.8596	-357.963
0.04835	36.3718	-360.902
0.0484	32.6713	-357.897
0.04845	36.8284	-359.417
0.0485	34.6931	-364.179
0.04855	35.4133	-355.544
0.0486	33.8405	-357.223
0.04865	37.2953	-360.599
0.0487	36.1611	-361.194
0.04875	36.3456	-358.006
0.0488	35.4861	-361.201
0.04885	35.7855	-359.141
0.0489	35.1905	-358.85
0.04895	36.8549	-359.493
0.049	35.181	-360.041
0.04905	36.5192	-357.411
0.0491	35.9626	-359.598
0.04915	34.3489	-358.67
0.0492	36.0763	-359.743
0.04925	37.9299	-360.098
0.0493	32.5479	-365.31
0.04935	37.3377	-361.855
0.0494	39.945	-359.376
0.04945	36.2153	-362.3
0.0495	36.7289	-361.794
0.04955	40.1801	-362.263
0.0496	35.1061	-362.984
0.04965	38.4499	-361.75
0.0497	37.6447	-357.746
0.04975	38.1291	-359.559
0.0498	38.5114	-364.674
0.04985	37.7651	-363.486
0.0499	37.6755	-358.305
0.04995	37.6404	-361.652
0.05	36.6829	-362.692
0.05005	38.8287	-362.402
0.0501	42.5516	-363.693
0.05015	39.5515	-361.168
0.0502	36.0503	-360.905
0.05025	37.7579	-360.083
0.0503	36.2046	-362.306
0.05035	34.146	-359.001
0.0504	35.1206	-356.883
0.05045	35.7101	-356.597
0.0505	36.5883	-359.483
0.05055	33.386	-358.469
0.0506	37.262	-355.081
0.05065	33.1246	-358.221
0.0507	34.3448	-359.885
0.05075	34.0677	-359.12
0.0508	33.8617	-360.869
0.05085	36.7977	-358.963
0.0509	35.8164	-359.614
0.05095	36.9626	-362.051
0.051	37.2787	-360.768
0.05105	36.5243	-356.532
0.0511	31.3233	-357.18
0.05115	34.7893	-357.745
0.0512	36.0907	-359.818
0.05125	34.171	-355.952
0.0513	33.7883	-361.502
0.05135	36.5127	-360.818
0.0514	34.9903	-359.914
0.05145	31.6885	-361.401
0.0515	33.9706	-359.512
0.05155	33.2969	-362.896
0.0516	34.736	-359.813
0.05165	36.323	-361.581
0.0517	36.1969	-360.153
0.05175	35.9273	-357.198
0.0518	33.1958	-360.077
0.05185	32.7363	-359.438
0.0519	33.8164	-357.788
0.05195	35.3891	-357.701
0.052	34.1645	-362.235
0.05205	39.3573	-361.625
0.0521	37.4924	-360.448
0.05215	36.5187	-360.898
0.0522	40.2971	-358.635
0.05225	40.2459	-359.497
0.0523	38.6263	-360.031
0.05235	35.964	-361.893
0.0524	37.2569	-356.705
0.05245	35.5423	-364.119
0.0525	34.4287	-356.295
0.05255	34.6398	-357.29
0.0526	35.7396	-360.494
0.05265	34.9518	-358.11
0.0527	34.8684	-360.327
0.05275	33.4468	-357.178
0.0528	36.0781	-358.526
0.05285	34.5271	-357.937
0.0529	36.0737	-353.273
0.05295	37.5792	-360.081
0.053	37.0338	-357.228
0.05305	34.1774	-355.8
0.0531	38.9404	-357.635
0.05315	38.5665	-358.494
0.0532	34.8832	-358.874
0.05325	33.3939	-358.467
0.0533	38.8681	-362.454
0.05335	37.0834	-361.122
0.0534	35.4065	-357.424
0.05345	35.3803	-360.239
0.0535	35.8687	-362.183
0.05355	38.9683	-361.551
0.0536	35.4386	-361.035
0.05365	34.9867	-359.529
0.0537	32.8125	-358.73
0.05375	34.8897	-359.733
0.0538	35.0585	-359.065
0.05385	33.8631	-358.771
0.0539	38.7296	-359.344
0.05395	35.6211	-362.019
0.054	37.9792	-358.62
0.05405	33.9335	-363.211
0.0541	32.9683	-362.023
0.05415	37.0656	-358.77
0.0542	35.4027	-360.308
0.05425	35.0029	-359.273
0.0543	40.5889	-360.646
0.05435	39.8776	-360.298
0.0544	34.9308	-361.145
0.05445	39.9939	-362.45
0.0545	39.8313	-362.488
0.05455	37.4953	-361.622
0.0546	37.7186	-363.799
0.05465	34.1339	-362.617
0.0547	37.1208	-361.468
0.05475	34.2969	-358.445
0.0548	35.4013	-361.183
0.05485	36.2092	-359.485
0.0549	39.1328	-355.774
0.05495	33.6048	-362.286
0.055	35.0758	-363.112
0.05505	35.677	-359.533
0.0551	35.4974	-362.879
0.05515	40.0899	-361.74
0.0552	38.2823	-361.931
0.05525	34.8163	-363.627
0.0553	36.7888	-361.259
0.05535	34.9265	-362.305
0.0554	32.891	-364.091
0.05545	39.2333	-361.353
0.0555	37.9958	-361.687
0.05555	29.0273	-362.38
0.0556	33.23	-360.926
0.05565	35.6911	-361.864
0.0557	31.5223	-359.58
0.05575	37.1025	-361.704
0.0558	35.1912	-362.372
0.05585	35.1054	-360.039
0.0559	36.379	-363.551
0.05595	42.4219	-364.694
0.056	37.4557	-359.434
0.05605	33.3542	-361.414
0.0561	37.7355	-362.212
0.05615	36.2315	-360.663
0.0562	40.2576	-361.431
0.05625	36.9317	-359.225
0.0563	40.2145	-360.108
0.05635	38.9776	-362.871
0.0564	36.0813	-362.118
0.05645	39.6345	-364.619
0.0565	37.9045	-364.839
0.05655	38.1052	-361.404
0.0566	40.0925	-361.231
0.05665	38.2863	-359.203
0.0567	34.5274	-360.35
0.05675	36.131	-361.557
0.0568	38.9782	-362.442
0.05685	41.0456	-358.83
0.0569	37.1131	-359.628
0.05695	35.7136	-359.058
0.057	36.2109	-360.601
0.05705	37.4564	-362.682
0.0571	33.7854	-360.655
0.05715	31.2607	-361.668
0.0572	36.101	-359.897
0.05725	37.7009	-363.027
0.0573	36.2035	-359.22
0.05735	36.9067	-354.549
0.0574	35.655	-357.276
0.05745	28.0932	-364.286
0.0575	32.1634	-359.268
0.05755	37.941	-362.099
0.0576	33.9598	-356.337
0.05765	30.9447	-361.145
0.0577	34.1398	-358.579
0.05775	36.6047	-354.741
0.0578	38.6349	-361.174
0.05785	36.0773	-358.013
0.0579	37.3757	-360.323
0.05795	37.2605	-357.603
0.058	34.6542	-360.462
0.05805	34.8154	-357.781
0.0581	38.9079	-360.7
0.05815	36.7355	-360.434
0.0582	34.6852	-356.844
0.05825	34.6497	-355.902
0.0583	36.6718	-359.908
0.05835	38.0388	-357.298
0.0584	37.9208	-356.651
0.05845	43.4155	-358.681
0.0585	39.0658	-359.105
0.05855	41.6635	-360.181
0.0586	36.8269	-360.296
0.05865	35.993	-358.661
0.0587	32.3043	-360.178
0.05875	34.0553	-360.731
0.0588	34.8077	-359.864
0.05885	37.5378	-359.567
0.0589	36.0897	-356.894
0.05895	33.4816	-359.348
0.059	32.6471	-359.672
0.05905	35.4474	-358.943
0.0591	35.5537	-360.803
0.05915	36.9966	-361.392
0.0592	34.0331	-358.081
0.05925	35.6787	-362.371
0.0593	40.6656	-361.021
0.05935	36.2758	-361.057
0.0594	35.159	-357.929
0.05945	39.2323	-362.094
0.0595	38.5332	-357.1
0.05955	36.2996	-359.125
0.0596	38.8519	-361.603
0.05965	36.5382	-356.352
0.0597	39.512	-358.562
0.05975	38.6822	-362.951
0.0598	38.8485	-359.906
0.05985	37.5931	-356.257
0.0599	33.6857	-358.343
0.05995	37.1645	-356.397
0.06	37.1711	-353.644
0.06005	33.5516	-360.008
0.0601	37.0489	-358.078
0.06015	36.3578	-354.503
0.0602	36.9582	-357.602
0.06025	37.1762	-358.246
0.0603	39.1426	-360.741
0.06035	37.6088	-357.157
0.0604	36.3369	-358.316
0.06045	39.7527	-360.473
0.0605	37.425	-361.37
0.06055	40.8454	-356.825
0.0606	40.7904	-362.87
0.06065	37.5993	-363.917
0.0607	37.2853	-357.567
0.06075	34.7085	-357.67
0.0608	41.7254	-362.371
0.06085	39.6598	-356.731
0.0609	36.4328	-359.303
0.06095	39.1787	-358.049
0.061	40.468	-358.58
0.06105	35.6405	-360.064
0.0611	35.5976	-359.911
0.06115	42.2234	-360.753
0.0612	38.51	-364.006
0.06125	36.9188	-361.325
0.0613	34.8291	-360.096
0.06135	42.1692	-356.989
0.0614	35.1633	-358.942
0.06145	38.8869	-358.266
0.0615	39.4837	-361.68
0.06155	39.8027	-358.952
0.0616	37.9312	-360.013
0.06165	36.4844	-360.233
0.0617	34.1562	-358.612
0.06175	35.8578	-358.092
0.0618	32.8001	-359.362
0.06185	34.985	-354.915
0.0619	39.6806	-359.526
0.06195	38.7632	-358.158
0.062	37.7661	-358.843
0.06205	34.7636	-357.638
0.0621	35.0869	-362.736
0.06215	35.5043	-360.603
0.0622	42.1796	-362.776
0.06225	40.913	-361.137
0.0623	34.0901	-357.639
0.06235	37.3306	-358.037
0.0624	35.3858	-356.942
0.06245	34.6026	-361.755
0.0625	35.0223	-358.24
0.06255	37.6625	-359.752
0.0626	36.225	-360.792
0.06265	35.1686	-360.315
0.0627	34.0802	-357.924
0.06275	35.9332	-358.413
0.0628	33.6344	-361.305
0.06285	31.8861	-358.412
0.0629	32.9472	-361.877
0.06295	33.0806	-360.216
0.063	40.4643	-358.492
0.06305	36.0394	-359.001
0.0631	33.4324	-358.547
0.06315	32.187	-355.579
0.0632	33.9107	-356.772
0.06325	33.7945	-357.504
0.0633	35.7596	-357.504
0.06335	33.4776	-357.593
0.0634	34.3976	-358.103
0.06345	36.0887	-356.273
0.0635	36.494	-358.294
0.06355	35.0556	-359.804
0.0636	37.3725	-362.02
0.06365	38.2575	-361.821
0.0637	35.6867	-361.841
0.06375	36.8351	-362.028
0.0638	31.4636	-360.562
0.06385	35.178	-358.221
0.0639	36.7879	-361.716
0.06395	36.9425	-362.529
0.064	36.749	-359.78
0.06405	35.6584	-360.235
0.0641	36.6816	-358.266
0.06415	34.7469	-358.426
0.0642	35.7015	-357.918
0.06425	39.9156	-360.571
0.0643	38.8907	-361.251
0.06435	39.2942	-361.384
0.0644	36.0435	-357.759
0.06445	39.8148	-358.978
0.0645	33.8616	-359.029
0.06455	38.7727	-356.993
0.0646	34.8476	-362.492
0.06465	34.7545	-357.757
0.0647	29.5566	-359.148
0.06475	34.306	-361.493
0.0648	33.7456	-363.946
0.06485	33.9663	-363.286
0.0649	33.1759	-363.853
0.06495	37.2827	-362.173
0.065	32.1232	-359.271
0.06505	34.4876	-357.221
0.0651	38.7015	-358.346
0.06515	37.5267	-355.671
0.0652	33.7336	-358.332
0.06525	31.0552	-359.793
0.0653	36.5794	-360.307
0.06535	34.0613	-360.778
0.0654	38.8977	-359.275
0.06545	33.4547	-361.774
0.0655	35.8145	-359.573
0.06555	33.7839	-359.646
0.0656	32.2934	-363.103
0.06565	35.9312	-361.409
0.0657	33.7155	-359.091
0.06575	34.1053	-355.82
0.0658	35.2488	-358.352
0.06585	36.2816	-359.055
0.0659	33.8955	-362.418
0.06595	35.7749	-360.584
0.066	32.3308	-360.409
0.06605	33.5322	-362.144
0.0661	33.4792	-363.825
0.06615	34.54	-360.367
0.0662	33.5552	-361.096
0.06625	30.0262	-362.371
0.0663	35.7652	-363.05
0.06635	33.86	-357.032
0.0664	33.8871	-357.066
0.06645	39.6567	-358.508
0.0665	37.4045	-359.293
0.06655	38.2078	-360.971
0.0666	38.8726	-358.647
0.06665	32.0387	-360.928
0.0667	31.1437	-362.04
0.06675	33.8644	-362.853
0.0668	37.5347	-361.027
0.06685	37.6051	-360.36
0.0669	35.4939	-359.827
0.06695	38.5987	-361.514
0.067	38.3673	-361.5
0.06705	37.5065	-358.964
0.0671	37.9439	-360.229
0.06715	38.4681	-358.871
0.0672	38.5082	-359.483
0.06725	37.258	-360.427
0.0673	39.031	-362.552
0.06735	36.5214	-358.14
0.0674	35.3127	-362.601
0.06745	34.932	-364.314
0.0675	36.015	-360.613
0.06755	38.6713	-359.487
0.0676	37.0709	-358.485
0.06765	36.0718	-363.577
0.0677	41.3078	-361.293
0.06775	35.6963	-357.412
0.0678	35.5974	-360.934
0.06785	36.9331	-359.922
0.0679	35.9135	-356.818
0.06795	36.9511	-359.773
0.068	36.786	-360.174
0.06805	29.0201	-359.343
0.0681	34.0795	-360.845
0.06815	36.0274	-358.27
0.0682	32.8652	-359.684
0.06825	33.9708	-362.086
0.0683	32.5737	-359.48
0.06835	33.791	-356.547
0.0684	35.5008	-358.081
0.06845	36.7698	-362.664
0.0685	38.4821	-360.412
0.06855	40.2999	-357.352
0.0686	37.8405	-360.288
0.06865	40.3475	-359.009
0.0687	37.0021	-357.41
0.06875	36.7543	-357.707
0.0688	35.546	-358.404
0.06885	35.1652	-357.637
0.0689	34.5091	-357.685
0.06895	32.1548	-361.933
0.069	35.5366	-363.491
0.06905	40.0525	-354.778
0.0691	36.0817	-357.928
0.06915	38.1635	-359.83
0.0692	36.8923	-360.957
0.06925	40.8555	-362.681
0.0693	42.3764	-360.202
0.06935	42.2105	-360.154
0.0694	33.708	-361.702
0.06945	36.9488	-361.58
0.0695	39.7877	-362.608
0.06955	37.0443	-360.047
0.0696	40.1593	-360.761
0.06965	35.3739	-361.711
0.0697	35.3271	-359.731
0.06975	35.0583	-360.727
0.0698	37.5866	-359.771
0.06985	34.7688	-355.906
0.0699	33.4076	-359.58
0.06995	36.5439	-358.412
0.07	37.5203	-357.637
0.07005	31.7811	-359.013
0.0701	35.7805	-359.945
0.07015	34.4751	-359.808
0.0702	36.5047	-357.591
0.07025	37.7706	-361.672
0.0703	33.3948	-363.123
0.07035	34.1182	-354.961
0.0704	36.5728	-360.871
0.07045	39.1301	-364.898
0.0705	34.4211	-363.163
0.07055	34.9083	-361.916
0.0706	35.037	-361.035
0.07065	35.3315	-362.839
0.0707	35.2408	-360.072
0.07075	38.5068	-358.645
0.0708	37.0267	-360.774
0.07085	40.8097	-361.635
0.0709	38.62	-360.651
0.07095	36.9517	-361.579
0.071	32.4005	-364.425
0.07105	39.5695	-359.57
0.0711	36.6223	-363.255
0.07115	41.2255	-360.703
0.0712	38.6948	-356.83
0.07125	38.8625	-360.415
0.0713	38.1014	-358.214
0.07135	37.9756	-358.512
0.0714	42.3735	-362.378
0.07145	40.1359	-361.542
0.0715	36.2402	-357.845
0.07155	33.9373	-360.691
0.0716	38.6126	-361.157
0.07165	39.889	-358.749
0.0717	41.7121	-357.601
0.07175	39.9362	-358.448
0.0718	39.2985	-358.673
0.07185	37.6689	-357.661
0.0719	36.9039	-360.521
0.07195	34.1109	-361.114
0.072	39.2871	-359.038
0.07205	33.7974	-362.327
0.0721	36.4338	-360.786
0.07215	38.2814	-359.963
0.0722	37.7412	-356.199
0.07225	34.1656	-361.441
0.0723	36.8486	-356.716
0.07235	34.2095	-361.107
0.0724	33.0772	-361.25
0.07245	33.9876	-360
0.0725	34.0362	-358.724
0.07255	35.6649	-360.048
0.0726	34.7655	-364.067
0.07265	39.6184	-361.715
0.0727	36.1508	-359.096
0.07275	32.2824	-360.871
0.0728	34.6349	-360.798
0.07285	37.1052	-356.709
0.0729	38.6562	-358.06
0.07295	37.1373	-360.499
0.073	38.8343	-357.713
0.07305	33.4414	-362.431
0.0731	33.312	-361.841
0.07315	36.7835	-358.971
0.0732	30.4106	-358.252
0.07325	34.2219	-360.267
0.0733	36.3358	-359.779
0.07335	38.9155	-362.109
0.0734	36.5834	-364.027
0.07345	40.6961	-364.419
0.0735	36.0159	-359.105
0.07355	36.1412	-357.783
0.0736	34.2635	-364.4
0.07365	30.594	-358.504
0.0737	32.6343	-361.086
0.07375	30.4943	-360.838
0.0738	31.8761	-362.709
0.07385	31.141	-364.301
0.0739	34.9786	-361.307
0.07395	36.6721	-362.897
0.074	39.4088	-361.179
0.07405	37.1795	-365.4
0.0741	36.9788	-362.032
0.07415	35.47	-359.718
0.0742	31.3596	-360.471
0.07425	33.7089	-359.715
0.0743	33.5691	-360.626
0.07435	31.9217	-358.307
0.0744	32.2865	-360.699
0.07445	38.1145	-358.812
0.0745	35.1645	-356.743
0.07455	32.7343	-364.262
0.0746	33.374	-362.187
0.07465	31.309	-360.651
0.0747	35.6138	-358.257
0.07475	37.2329	-359.896
0.0748	33.0125	-361.07
0.07485	32.8351	-362.282
0.0749	33.4075	-365.264
0.07495	34.061	-361.48
0.075	30.7384	-360.575
0.07505	31.7217	-363.813
0.0751	32.396	-363.694
0.07515	30.542	-362.621
0.0752	34.74	-361.063
0.07525	34.0012	-362.961
0.0753	29.0955	-359.084
0.07535	30.3926	-364.532
0.0754	33.9651	-361.219
0.07545	34.1856	-363.247
0.0755	34.7373	-361.686
0.07555	33.9479	-361.888
0.0756	35.9012	-364.551
0.07565	36.631	-357.16
0.0757	34.1365	-362.565
0.07575	37.44	-361.391
0.0758	37.6872	-363.258
0.07585	35.726	-360.292
0.0759	36.2334	-363.596
0.07595	34.7042	-364.929
0.076	36.7639	-359.328
0.07605	38.0464	-364.152
0.0761	36.4863	-364.85
0.07615	36.4514	-361.2
0.0762	37.1526	-360.327
0.07625	36.2157	-363.815
0.0763	35.9906	-360.12
0.07635	33.5147	-361.646
0.0764	35.2566	-362.065
0.07645	38.6005	-364.574
0.0765	34.4352	-366.315
0.07655	36.4793	-364.506
0.0766	32.5291	-361.883
0.07665	33.1085	-361.427
0.0767	32.1362	-360.281
0.07675	36.1862	-365.519
0.0768	29.894	-362.871
0.07685	35.569	-363.876
0.0769	38.3747	-362.489
0.07695	34.1819	-361.482
0.077	32.2337	-362.864
0.07705	34.9258	-359.993
0.0771	35.8043	-359.427
0.07715	34.8022	-359.027
0.0772	35.7814	-359.639
0.07725	33.3238	-361.364
0.0773	35.5349	-362.226
0.07735	38.219	-360.047
0.0774	38.894	-361.393
0.07745	35.8425	-362.504
0.0775	36.3144	-362.138
0.07755	35.1408	-365.014
0.0776	33.5489	-359.533
0.07765	32.4652	-361.075
0.0777	32.7065	-360.909
0.07775	33.7048	-358.261
0.0778	34.7434	-357.742
0.07785	29.7943	-359.399
0.0779	31.5825	-362.798
0.07795	31.2042	-360.308
0.078	32.7382	-360.519
0.07805	32.6903	-359.316
0.0781	36.2704	-359.2
0.07815	34.9939	-358.144
0.0782	35.4402	-357.873
0.07825	35.2242	-359.557
0.0783	36.549	-360.44
0.07835	36.973	-357.405
0.0784	37.5455	-363.284
0.07845	40.0335	-358.854
0.0785	37.2987	-360.864
0.07855	35.5381	-364.29
0.0786	41.7545	-360.911
0.07865	33.5458	-359.375
0.0787	37.4088	-357.395
0.07875	37.6128	-359.827
0.0788	36.518	-359.281
0.07885	32.6816	-355.718
0.0789	34.1289	-359.429
0.07895	35.1622	-359.94
0.079	36.9796	-363.927
0.07905	33.2823	-359.741
0.0791	38.693	-360.379
0.07915	36.2733	-361.075
0.0792	37.3336	-362.18
0.07925	35.9972	-361.742
0.0793	38.5968	-361.403
0.07935	35.5703	-360.618
0.0794	35.7757	-361.124
0.07945	37.9036	-362.141
0.0795	37.0501	-357.542
0.07955	37.3397	-363.083
0.0796	39.329	-362.607
0.07965	33.2837	-358.561
0.0797	35.0095	-360.667
0.07975	31.6914	-361.458
0.0798	36.3988	-357.9
0.07985	36.9357	-360.171
0.0799	39.4586	-357.761
0.07995	37.6874	-359.27
0.08	36.7536	-359.274
0.08005	41.5205	-360.341
0.0801	36.0531	-360.151
0.08015	37.4054	-358.078
0.0802	35.1654	-358.212
0.08025	37.3049	-357.583
0.0803	39.9642	-356.918
0.08035	36.0169	-357.7
0.0804	37.0953	-357.501
0.08045	33.9065	-360.116
0.0805	36.8656	-359.506
0.08055	36.3477	-362.32
0.0806	37.0971	-360.577
0.08065	35.4279	-357.321
0.0807	37.6696	-362.817
0.08075	36.6647	-359.935
0.0808	35.2487	-358.698
0.08085	37.1607	-360.071
0.0809	36.4534	-360.014
0.08095	36.7909	-360.192
0.081	37.1142	-363.483
0.08105	35.7076	-360.522
0.0811	32.5109	-359.41
0.08115	35.3573	-358.494
0.0812	34.6704	-358.205
0.08125	32.0638	-362.465
0.0813	37.0268	-359.295
0.08135	36.2178	-363.472
0.0814	41.5158	-362.716
0.08145	34.2188	-360.574
0.0815	34.4343	-363.207
0.08155	38.8005	-362.108
0.0816	34.2993	-358.742
0.08165	34.9022	-356.376
0.0817	36.515	-359.338
0.08175	35.2962	-358.633
0.0818	36.7112	-358.409
0.08185	37.1271	-359.493
0.0819	38.2005	-359.691
0.08195	36.716	-357.794
0.082	36.2548	-359.808
0.08205	37.6235	-361.956
0.0821	36.4409	-361.463
0.08215	32.5872	-357.706
0.0822	38.3406	-363.484
0.08225	38.3283	-362.251
0.0823	37.0004	-361.613
0.08235	37.352	-362.688
0.0824	37.6791	-365.177
0.08245	37.2769	-361.653
0.0825	42.7334	-360.264
0.08255	38.7585	-363.136
0.0826	38.0166	-361.093
0.08265	39.9076	-360.258
0.0827	41.4371	-362.318
0.08275	38.343	-361.876
0.0828	41.161	-362.054
0.08285	37.7989	-364.001
0.0829	37.2569	-365.028
0.08295	34.9197	-358.696
0.083	37.4105	-360.794
0.08305	37.5351	-363.431
0.0831	39.2307	-358.787
0.08315	41.1335	-362.954
0.0832	41.4066	-366.399
0.08325	37.4823	-364.131
0.0833	41.0516	-362.558
0.08335	34.829	-361.735
0.0834	39.9973	-360.944
0.08345	38.909	-361.103
0.0835	35.2091	-361.363
0.08355	36.2721	-357.956
0.0836	34.4721	-357.933
0.08365	37.2701	-357.339
0.0837	33.9416	-357.712
0.08375	36.1965	-361.927
0.0838	40.8299	-361.714
0.08385	34.1286	-361.033
0.0839	34.6923	-358.731
0.08395	35.0285	-360.295
0.084	34.5923	-360.934
0.08405	37.6383	-360.725
0.0841	36.2192	-355.288
0.08415	35.9238	-357.801
0.0842	32.7776	-360.098
0.08425	36.9237	-356.881
0.0843	26.2804	-357.866
0.08435	37.1726	-361.129
0.0844	38.6109	-360.261
0.08445	33.3209	-362.021
0.0845	37.1909	-359.07
0.08455	37.8947	-358.75
0.0846	36.8869	-363.062
0.08465	35.6264	-359.639
0.0847	36.866	-357.527
0.08475	35.8259	-358.384
0.0848	39.5176	-359.957
0.08485	35.6988	-359.392
0.0849	39.6805	-359.31
0.08495	34.603	-361.317
0.085	36.2031	-363.981
0.08505	36.4792	-361.232
0.0851	36.9041	-361.239
0.08515	38.0622	-362.283
0.0852	37.8974	-361.923
0.08525	39.4292	-359.612
0.0853	39.1864	-364.615
0.08535	37.6664	-364.683
0.0854	38.7176	-362.749
0.08545	39.7775	-365.177
0.0855	38.946	-362.806
0.08555	39.4102	-360.375
0.0856	38.2519	-361.26
0.08565	36.1088	-360.633
0.0857	36.3124	-360.457
0.08575	38.7139	-359.755
0.0858	34.3609	-359.075
0.08585	35.2844	-359.815
0.0859	36.0039	-360.283
0.08595	36.8515	-361.292
0.086	36.8433	-359.906
0.08605	34.1139	-358.55
0.0861	37.5174	-362.462
0.08615	39.6493	-362.021
0.0862	42.6588	-362.84
0.08625	39.0683	-365.919
0.0863	38.9015	-363.406
0.08635	36.9947	-366.479
0.0864	40.0489	-363.979
0.08645	37.9584	-362.59
0.0865	40.7229	-361.258
0.08655	36.0493	-361.909
0.0866	37.1228	-366.632
0.08665	40.6717	-360.736
0.0867	34.6614	-359.383
0.08675	36.0121	-359.655
0.0868	36.742	-361.548
0.08685	36.6171	-362.451
0.0869	34.1849	-362.816
0.08695	35.5466	-365.086
0.087	39.606	-363.886
0.08705	38.3273	-363.252
0.0871	40.6258	-363.887
0.08715	37.8143	-361.095
0.0872	36.8386	-362.397
0.08725	40.6074	-362.151
0.0873	39.9964	-361.424
0.08735	32.7078	-358.2
0.0874	35.1415	-360.694
0.08745	38.5574	-364.6
0.0875	40.7698	-367.761
0.08755	40.0996	-365.647
0.0876	35.2435	-364.611
0.08765	40.8247	-367.523
0.0877	40.4985	-362.032
0.08775	37.6838	-368.559
0.0878	39.9468	-365.743
0.08785	37.5034	-361.755
0.0879	33.5673	-367.132
0.08795	39.3222	-365.438
0.088	39.6543	-361.924
0.08805	42.2874	-362.847
0.0881	38.8546	-366.835
0.08815	41.6288	-358.821
0.0882	38.1596	-361.164
0.08825	39.7665	-360.356
0.0883	37.6555	-362.507
0.08835	40.6019	-361.17
0.0884	34.0495	-362.096
0.08845	38.7471	-368.202
0.0885	38.2482	-365.96
0.08855	37.2301	-362.644
0.0886	31.325	-363.217
0.08865	36.591	-362.046
0.0887	27.2091	-363.621
0.08875	32.1521	-360.98
0.0888	32.5775	-358.991
0.08885	37.1399	-360.726
0.0889	36.2846	-365.528
0.08895	42.6246	-362.728
0.089	35.7332	-364.207
0.08905	33.7686	-362.149
0.0891	33.9699	-365.626
0.08915	35.2625	-366.263
0.0892	38.1288	-362.626
0.08925	37.4204	-362.518
0.0893	38.3793	-361.333
0.08935	35.524	-359.483
0.0894	39.2386	-361.082
0.08945	40.0178	-362.983
0.0895	40.2982	-361.282
0.08955	38.4475	-359.38
0.0896	38.0354	-359.804
0.08965	38.3528	-362.685
0.0897	38.3344	-361.97
0.08975	35.5777	-362.858
0.0898	35.3242	-359.795
0.08985	37.7242	-362.206
0.0899	36.3644	-362.996
0.08995	37.5533	-361.464
0.09	40.6127	-358.853
0.09005	35.3497	-360.058
0.0901	37.5674	-358.529
0.09015	36.7732	-358.341
0.0902	37.5545	-358.399
0.09025	35.4692	-361.878
0.0903	33.5076	-360.195
0.09035	38.2741	-358.918
0.0904	36.6816	-358.912
0.09045	40.0662	-363.996
0.0905	37.471	-363.651
0.09055	37.2331	-363.976
0.0906	39.8989	-363.91
0.09065	40.0938	-364.996
0.0907	38.9707	-359.625
0.09075	38.51	-361.059
0.0908	39.523	-360.02
0.09085	36.3027	-356.418
0.0909	40.1366	-359.441
0.09095	39.2886	-358.798
0.091	35.0947	-359.068
0.09105	37.8139	-359.667
0.0911	39.725	-361.128
0.09115	39.4709	-360.311
0.0912	38.2354	-359.694
0.09125	35.4718	-359.937
0.0913	35.939	-359.548
0.09135	32.3323	-357.42
0.0914	34.3927	-356.827
0.09145	37.2096	-360.752
0.0915	36.3681	-359.476
0.09155	33.1613	-358.582
0.0916	36.113	-356.258
0.09165	36.3907	-353.777
0.0917	33.8549	-358.592
0.09175	38.6257	-359.714
0.0918	37.7932	-360.957
0.09185	34.6464	-361.899
0.0919	37.1114	-358.524
0.09195	36.8418	-361.149
0.092	34.4869	-359.368
0.09205	35.4243	-362.274
0.0921	34.4699	-359.399
0.09215	35.7794	-362.804
0.0922	35.8197	-358.483
0.09225	35.5708	-362.453
0.0923	38.8375	-359.952
0.09235	39.808	-358.955
0.0924	34.6055	-361.606
0.09245	36.3532	-362.82
0.0925	31.745	-361.792
0.09255	34.3934	-362.766
0.0926	36.0458	-361.925
0.09265	36.0252	-358.957
0.0927	37.6714	-358.219
0.09275	36.0809	-362.379
0.0928	37.8222	-363.433
0.09285	31.1433	-358.417
0.0929	34.9927	-360.986
0.09295	38.771	-360.811
0.093	33.9394	-355.711
0.09305	33.4349	-359.331
0.0931	35.4907	-361.804
0.09315	32.5864	-358.944
0.0932	36.0101	-355.066
0.09325	32.3356	-358.262
0.0933	31.839	-359.207
0.09335	30.528	-357.736
0.0934	32.9388	-363.388
0.09345	36.7924	-362.094
0.0935	37.2798	-361.977
0.09355	33.9457	-362.578
0.0936	31.6853	-362.149
0.09365	36.5066	-358.812
0.0937	34.9825	-359.022
0.09375	35.0726	-358.502
0.0938	36.5247	-360.322
0.09385	34.925	-359.418
0.0939	35.0431	-360.363
0.09395	32.0679	-364.242
0.094	37.3319	-359.66
0.09405	36.7064	-361.252
0.0941	36.4539	-361.938
0.09415	36.7117	-360.623
0.0942	34.0654	-358.979
0.09425	34.4025	-360.445
0.0943	35.8963	-362.442
0.09435	35.5802	-363.567
0.0944	34.8388	-361.87
0.09445	36.1234	-360.821
0.0945	39.3976	-359.449
0.09455	41.0617	-361.151
0.0946	37.5018	-363.221
0.09465	37.5785	-362.808
0.0947	37.1529	-360.701
0.09475	40.1409	-363.017
0.0948	40.129	-358.676
0.09485	42.263	-360.065
0.0949	37.1499	-363.2
0.09495	33.0905	-363.542
0.095	35.8164	-359.204
0.09505	36.5184	-361.595
0.0951	36.5519	-363.279
0.09515	33.5928	-361.985
0.0952	31.9447	-359.532
0.09525	34.2621	-363.765
0.0953	35.4149	-361.277
0.09535	35.0089	-361.106
0.0954	34.4247	-363.917
0.09545	36.1096	-358.508
0.0955	35.648	-363.647
0.09555	36.6188	-359.135
0.0956	37.8182	-363.231
0.09565	36.9877	-361.094
0.0957	39.6682	-359.689
0.09575	35.5337	-362.513
0.0958	34.7171	-363.474
0.09585	37.0636	-359.205
0.0959	38.0033	-361.622
0.09595	35.2456	-362.852
0.096	34.737	-358.251
0.09605	35.9983	-360.214
0.0961	37.2722	-362.139
0.09615	36.0366	-361.491
0.0962	36.6397	-357.561
0.09625	34.2889	-364.106
0.0963	37.5209	-361.442
0.09635	31.9082	-361.92
0.0964	40.5366	-360.303
0.09645	41.2402	-360.88
0.0965	40.3736	-361.256
0.09655	43.9601	-362.45
0.0966	41.3596	-361.428
0.09665	39.7511	-360.61
0.0967	39.4746	-361.134
0.09675	39.6831	-362.989
0.0968	35.7402	-361.815
0.09685	39.5636	-360.971
0.0969	41.345	-362.556
0.09695	37.131	-361.475
0.097	41.7834	-362.396
0.09705	39.1505	-363.129
0.0971	37.243	-363.011
0.09715	37.0035	-361.386
0.0972	32.0548	-358.802
0.09725	34.8777	-361.726
0.0973	36.8714	-361.262
0.09735	34.6704	-363.875
0.0974	40.5954	-361.282
0.09745	39.3401	-361.859
0.0975	35.9706	-360.677
0.09755	34.103	-360.996
0.0976	36.1836	-362.793
0.09765	37.2606	-359.449
0.0977	36.1599	-362.416
0.09775	38.9376	-361.142
0.0978	36.3448	-358.402
0.09785	30.6949	-362.437
0.0979	34.2636	-360.595
0.09795	30.9227	-362.975
0.098	35.2512	-361.717
0.09805	35.7161	-361.583
0.0981	37.6251	-361.04
0.09815	37.1722	-361.352
0.0982	35.2175	-360.348
0.09825	30.4813	-362.569
0.0983	30.546	-360.164
0.09835	31.5575	-359.353
0.0984	35.0541	-360.73
0.09845	31.7678	-361.943
0.0985	33.4042	-358.46
0.09855	36.0572	-361.665
0.0986	36.2443	-359.829
0.09865	34.7178	-359.737
0.0987	31.7209	-358.62
0.09875	38.5154	-358.478
0.0988	39.53	-359.16
0.09885	38.5559	-359.504
0.0989	35.5448	-363.924
0.09895	37.3167	-363.513
0.099	37.0547	-360.09
0.09905	34.769	-361.605
0.0991	35.7431	-360.419
0.09915	37.3219	-358.15
0.0992	33.6294	-362.714
0.09925	36.1619	-357.175
0.0993	37.7427	-356.907
0.09935	37.8693	-360.434
0.0994	38.1464	-362.092
0.09945	36.7285	-359.506
0.0995	37.1108	-359.236
0.09955	38.3034	-360.998
0.0996	36.5581	-363.858
0.09965	38.8539	-360.372
0.0997	36.9637	-362.136
0.09975	36.6613	-363.982
[truncated: 204,638+ more rows]
