# Supplementary material for: Kinetic regulation of kinesin’s two motor domains coordinates its stepping along microtubules
Source: eLife. 2025 Apr 17;14:RP106228. doi: 10.7554/eLife.106228 (PMC12005725; doi:10.7554/eLife.106228)
Supplement: Figure 6—figure supplement 1—source data 1. [file elife-106228-fig6-figsupp1-data1.xlsx]

## Sheet: Sheet1
ATPase	E236A/WT heterodimer		Fig.6-suppl 1
MT	G12	G7	G3	G0
0	0.0219	0.212	0.0356	0.0657
0.0125	1.21	0.581	0.0831	0.127
0.025	1.62	0.843	0.144	0.158
0.05	2.28	1.2	0.309	0.288
0.1	2.95	1.78	0.74	0.663
0.2	3.81	2.47	1.46	1.28
0.4	4.91	3.3	2.19	2.01
0.8	5.95	4.03	2.89	2.76
1.6	7.15	4.7	3.5	3.44
