# Supplementary material for: Kinetic regulation of kinesin’s two motor domains coordinates its stepping along microtubules
Source: eLife. 2025 Apr 17;14:RP106228. doi: 10.7554/eLife.106228 (PMC12005725; doi:10.7554/eLife.106228)
Supplement: Figure 6—figure supplement 5—source data 1. [file elife-106228-fig6-figsupp5-data1.xlsx]

## Sheet: Sheet1
smFRET	AlexaATP	E236A-WT		Fig.6-suppl 5A
5ps	G7			G12
	Cy3	Cy5		Cy3	Cy5
	2.37	7.357		1.209	8.606
	1.472	6.719		1.107	6.36
	2.907	8.226		0.89	6.708
	2.646	5.618		-0.791	5.215
	4.762	9.023		3.223	5.722
	2.472	7.994		1.716	7.853
	1.791	5.313		2.745	5.708
	1.37	6.762		2.238	4.23
	0.312	10.197		0.557	4.476
	0.921	8.762		1.861	3.418
	4.501	5.618		0.6	5.099
	2.052	8.69		1.194	6.244
	4.037	7.168		0.89	4.432
	0.443	5.849		0.006	6.432
	3.617	6.444		-0.588	7.838
	1.457	8.284		1.31	5.056
	1.472	6.038		2.267	7.635
	0.283	6.994		3.006	2.259
	1.023	9.038		-0.835	-0.655
	2.312	5.777		-0.516	6.853
	1.82	6.284		0.252	2.708
	-0.441	4.545		0.093	4.882
	2.283	7.849		0.339	7.505
	0.863	7.313		0.803	6.36
	1.515	2.936		-0.328	4.374
	3.11	8.197		1.441	7.693
	1.254	8.125		-0.545	5.085
	0.878	5.589		1.02	8.94
	0.399	7.647		4.136	0.07
	1.747	4.415		5.209	0.461
	3.167	6.951		6.455	0.853
	0.704	2.704		4.701	-0.379
	1.863	6.154		3.223	-2.785
	1.907	6.154		3.252	1.128
	2.428	5.197		5.701	-0.408
	-0.282	10.226		8.354	2.534
	0.675	5.69		4.281	-0.263
	0.762	7.023		7.962	3.418
	3.037	6.994		8.31	0.722
	0.936	10.748		6.412	-0.77
	-0.325	4.284		7.281	-1.147
	1.486	5.212		6.078	-0.611
	0.399	6.473		7.426	1.259
	0.907	5.009		4.948	1.534
	3.312	5.255		3.948	0.012
	2.008	5.878		6.455	0.679
	0.631	5.342		6.049	0.853
	-0.282	3.429		3.991	0.302
	3.588	5.632		7.687	1.737
	1.936	4.835		5.122	1.23
	3.066	4.806		6.701	-0.118
	2.965	7.241		4.325	1.128
	1.414	7.618		6.977	-2.959
	2.66	8.632		4.397	-0.278
	1.312	4.69		5.194	0.708
	-0.021	6.907		7.832	1.027
	0.298	4.748		4.629	0.259
	0.356	2.56		6.397	1.23
	1.573	3.531		3.542	-2.22
	2.921	4.994		8.383	3.027
	2.24	6.864		4.875	0.896
	0.501	4.183		4.788	0.056
	1.776	5.458		5.151	-1.278
	1.167	7.023		6.832	-0.104
	1.892	6.791		7.339	-0.626
	1.327	2.965		4.962	1.577
	1.095	7.313		5.049	0.23
	-0.006	7.502		5.89	1.056
	1.211	7.487		5.412	1.389
	1.559	6.545		6.919	-0.089
	2.907	7.023		8.701	-0.263
	3.631	6.444		9.643	-0.669
	0.515	4.632		7.18	-1.51
	0.167	8.081		9.571	-0.785
	2.53	7.676		7.904	-1.336
	0.907	7.864		7.672	1.925
	2.979	6.096		7.339	1.693
	0.052	4.429		8.817	0.302
	1.689	10.618		3.904	-2.669
	0.617	6.052		10.933	-2.278
	1.211	4.023		8.107	-2.437
	1.225	7.371		8.803	2.215
	-0.224	7.255		10.02	-1.394
	0.834	5.545		7.542	0.563
	4.385	9.589		5.281	0.983
	-0.948	4.139		4.672	3.23
	3.167	7.023		6.875	1.389
	0.791	6.226		5.499	-0.394
	1.023	8.386		5.267	-1.77
	-0.035	6.574		5.122	-0.176
	2.443	7.386		1.875	3.577
	1.182	5.096		2.73	4.722
	2.066	5.618		3.919	-2.191
	3.675	6.125		6.252	0.041
	1.196	4.226		5.107	-0.437
	1.762	5.618		2.861	1.114
	1.457	6.864		4.02	-2.133
	0.907	8.255		5.875	-0.423
	3.602	6.4		6.281	-2.626
	1.095	4.139		4.861	1.244
	3.254	7.473		4.817	1.288
	1.66	7.849		6.658	0.911
	3.167	7.777		5.629	0.172
	2.979	4.791		8.296	1.331
	3.081	9.357		3.919	-0.191
	-0.035	5.067		6.209	2.36
	1.023	6.516		5.658	1.128
	1.052	7.096		6.151	1.954
	2.298	7.603		0.919	1.867
	0.225	8.676		4.426	1.201
	0.573	8.052		4.542	-1.597
	0.095	3.936		8.383	3.534
	2.878	5.284		5.194	-0.205
	1.863	7.328		4.6	0.94
	1.747	7.313		3.759	2.027
	3.11	12.733		6.02	-1.176
	0.312	8.849		8.02	0.041
	0.791	6.893		6.107	0.809
	-0.18	10.4		5.281	0.36
	0.37	6.154		3.165	0.548
	2.196	7.835		5.89	-1.104
	1.052	7.168		6.542	0.577
	0.037	7.878		5.571	-1.35
	-1.195	6.69		6.47	1.737
	3.008	7.806		5.643	0.23
	-1.311	3.502		4.745	1.389
	1.457	9.023		4.252	-0.785
	1.24	5.458		6.89	0.548
	2.617	5.4		3.962	0.592
	1.472	8.878		6.542	1.78
	-0.267	5.487		6.615	-1.872
	1.138	7.589		5.629	0.983
	2.907	8.791		5.73	1.65
	0.182	5.733		9.252	0.099
	0.182	3.965		8.788	-0.234
	2.617	5.835		6.948	2.722
	3.486	6.762		5.325	-1.017
	1.312	8.647		7.136	0.751
	3.254	5.69		4.455	-3.133
	1.341	5.806		5.832	-0.77
	1.559	6.835		6.716	-1.539
	0.704	8.733		4.745	-2.017
	2.689	7.777		6.528	2.331
	1.907	5.589		6.296	-1.365
	3.559	8.806		3.136	-0.075
	2.269	9.023		4.151	2.143
	2.414	7.458		5.209	2.201
	2.66	11.342		4.586	-1.133
	0.196	6.849		4.571	-0.611
	2.82	4.806		3.629	0.737
	0.327	5.893		6.064	0.809
	1.878	4.719		7.672	1.954
	2.225	7.849		5.354	-0.495
	0.515	7.299		6.933	-0.872
	2.704	3.849		1.948	-0.205
	2.428	7.183		5.368	1.867
	1.023	5.545		6.354	0.056
	2.356	5.371		2.933	-0.379
	2.443	9.965		6.962	2.374
	0.356	8.27		3.339	2.867
	2.979	7.487		4.194	-1.394
	0.196	6.429		5.586	-1.843
	1.269	5.125		3.151	-1.814
	0.298	10.661		3.6	-0.263
	0.936	4.632		6.252	-0.017
	0.24	4.197		5.499	1.606
	2.037	12.255		5.281	1.085
	1.559	4.777		4.484	-0.626
	1.153	10.893		7.513	1.751
	-0.601	5.183		7.499	2.099
	1.776	5.328		7.252	-0.77
	2.298	9.661		7.904	-0.466
	0.472	6.328		7.672	0.505
	0.269	8.893		7.455	0.621
	2.892	6.4		5.426	0.925
	-1.093	10.183		6.499	-1.002
	0.617	7.676		4.513	-0.857
	0.298	4.516		8.991	1.49
	2.82	10.328		6.672	0.795
	2.023	3.429		8.296	0.36
	1.283	4.284		7.745	-0.611
	1.559	4.154		8.846	-2.133
	4.11	9.038		2.368	-0.205
	4.834	8.183		1.643	2.461
	2.341	8.183		-0.154	1.244
	2.298	9.27		6.078	4.592
	1.081	7.56		5.47	1.766
	0.878	8.82		6.049	0.998
	2.095	4.849		7.571	4.418
	-0.209	9.11		7.499	0.824
	2.443	7.56		5.499	0.722
	1.573	6.154		7.846	1.78
	-0.064	7.69		6.136	2.07
	-0.325	5.545		7.586	-1.191
	2.225	5.313		1.977	0.389
	0.834	9.806		9.513	-1.017
	1.82	7.704		5.919	2.288
	2.052	7.849		5.962	3.085
	1.269	7.154		4.759	1.099
	2.994	6.241		6.904	-0.669
	2.211	7.023		8.165	3.157
	1.153	6.255		7.586	0.766
	1.124	5.893		5.977	-0.799
	0.544	6.864		7.484	-2.495
	2.008	4.878		7.643	1.302
	0.863	5.125		7.165	1.911
	1.791	4.965		5.368	0.78
	1.675	5.965		6.948	0.041
	1.791	5.328		7.774	0.461
	0.689	6.023		5.933	-0.394
	2.95	6.27		6.687	-0.046
	1.675	8.038		7.035	-2.075
	4.53	5.328		9.615	3.041
	-0.847	4.009		8.441	2.94
	2.631	9.212		8.658	0.041
	0.776	4.864		7.643	1.027
	1.254	6.023		7.919	-0.075
	-0.34	6.328		6.716	-0.104
	1.153	5.4		8.412	0.447
	3.718	8.748		6.788	1.998
	-1.18	8.936		6.165	0.809
	0.052	6.038		7.252	0.143
	2.283	14.429		8.006	1.766
	1.631	5.574		6.745	-1.017
	1.965	6.125		6.267	-0.553
	0.675	4.386		5.832	-1.843
	0.443	6.531		5.528	-0.756
	0.747	3.733		7.325	-2.495
	3.095	6.081		6.049	-2.466
	0.023	11.139		6.716	-0.915
	0.53	11.067		6.542	-1.611
	1.66	4.806		5.281	-0.756
	0.979	6.733		4.948	-0.843
	1.66	7.791		8.658	-2.51
	2.095	7.502		7.078	-0.684
	1.486	3.56		8.31	0.751
	1.138	6.415		5.933	0.621
	-0.427	7.415		8.035	2.316
	2.791	4.965		5.107	-1.017
	1.907	7.777		7.615	-1.249
	2.023	3.371		6.252	-0.336
	-0.209	2.618		4.267	0.737
	0.515	5.69		6.6	1.476
	0.124	6.893		3.354	-2.785
	1.124	8.777		4.991	-0.611
	0.979	5.154		5.281	-0.626
	-0.514	6.762		6.122	1.201
	0.472	9.965		4.325	-0.437
	-0.108	4.922		5.615	-0.727
	0.66	3.69		6.368	-0.104
	1.457	8.922		6.774	0.722
	1.53	4.849		8.991	0.606
	3.37	7.69		6.6	0.345
	0.443	5.82		6.267	2.099
	0.081	6.168		7.586	0.461
	0.675	4.849		7.557	0.186
	1.965	8.603		4.919	1.476
	0.733	11.009		5.6	-0.973
	0.457	7.096		7.513	-2.133
	1.457	3.98		5.846	2.418
	0.283	7.589		7.412	0.969
	-0.224	7.661		5.817	3.621
	0.936	6.038		7.846	2.795
	0.921	1.704		8.586	-0.973
	1.675	6.849		5.861	0.345
	-0.833	4.183		7.658	-0.611
	2.617	5.994		7.803	1.114
	2.008	8.183		7.861	-0.741
	1.762	8.067		4.977	1.114
	1.776	5.255		7.513	1.447
	2.747	8.038		5.658	-1.872
	0.849	7.212		9.122	0.476
	2.11	6.907		8.484	-0.104
	1.921	7.589		7.455	-0.495
	0.153	8.444		7.89	0.186
	2.196	7.052		7.223	0.563
	0.327	8.284		5.991	0.49
	1.211	6.849		1.919	6.056
	1.834	6.864		0.759	4.621
	0.269	6.27		-1.255	3.911
	1.124	8.791		-0.617	4.201
	-0.108	5.531		1.557	4.432
	2.414	7.502		0.325	3.969
	1.573	8.284		0.615	4.896
	1.095	7.299		1.252	3.476
	2.081	8.806		1.643	5.259
	1.791	9.125		1.455	5.099
	0.066	4.69		1.6	4.635
	0.182	4.342		2.238	4.49
	1.501	6.487		0.484	4.722
	-0.238	6.849		2.165	5.563
	0.921	2.936		1.267	7.664
	0.994	5.878		1.339	7.143
	0.24	7.69		2.658	5.606
	1.457	4.661		1.151	4.157
	0.602	3.965		1.252	3.679
	0.037	5.386		3.455	-0.191
	-0.702	5.661		4.499	0.911
	1.196	6.98		3.354	-2.568
	1.023	6.415		5.991	0.447
	1.052	9.371		3.73	-0.785
	1.602	9.444		6.339	0.041
	0.66	5.212		5.165	1.345
	-0.731	4.719		2.759	1.853
	2.776	5.11		5.368	1.708
	0.066	5.299		4.658	1.534
	-0.702	3.444		5.397	2.548
	0.167	7.864		5.528	0.606
	0.312	8.502		5.02	0.099
	0.298	8.487		3.948	-0.075
	-0.369	5.502		3.629	0.36
	-0.122	7.502		7.658	2.476
	1.095	4.516		3.629	-0.379
	1.646	7.618		3.238	1.911
	1.472	8.907		4.325	0.027
	-0.818	6.154		6.73	1.012
	0.66	6.531		3.803	-0.263
	0.965	5.183		4.73	0.809
	1.863	6.241		3.586	1.795
	2.081	7.255		5.861	-1.031
	2.849	5.096		4.977	-0.886
	3.399	6.357		5.875	2.302
	1.298	9.603		5.383	0.664
	1.994	7.226		5.629	1.244
	-0.021	5.574		4.035	-1.278
	0.95	5.719		2.615	-0.408
	0.863	6.299		7.658	1.085
	-0.934	6.255		5.759	1.041
	2.544	6.197		3.455	-1.249
	1.052	7.936		4.977	1.099
	2.167	5.197		3.759	-0.843
	1.82	5.98		3.151	2.447
	2.617	4.589		5.397	-0.64
	1.095	8.168		5.252	2.273
	4.269	9.777		4.528	0.056
	1.298	6.965		3.209	-1.365
	1.153	7.748		4.89	1.983
	1.095	6.342		4.948	2.548
	1.501	7.69		2.412	-1.292
	0.965	6.733		4.209	0.345
	1.965	5.632		5.919	1.143
	0.356	8.98		5.745	1.78
	3.11	8.009		2.861	-1.843
	2.254	5.11		5.223	0.664
	2.994	6.255		5.296	2.809
	0.733	5.574		3.238	-0.089
	-0.311	9.762		5.151	-0.249
	1.501	9.791		3.455	1.143
	-0.325	9.994		3.47	0.374
	-1.18	7.4		6.035	0.693
	1.718	7.69		6.122	0.853
	-0.89	7.168		4.73	0.534
	-0.369	7.241		2.846	-0.35
	1.82	5.473		5.397	-1.22
	2.298	7.748		5.962	0.432
	1.298	3.226		5.73	0.693
	0.82	6.965		7.73	-2.292
	3.283	6.661		6.412	-0.857
	2.24	9.82		8.223	2.664
	-0.108	4.618		6.238	4.447
	0.167	6.429		5.991	0.36
	1.095	6.226		3.788	1.374
	-0.267	6.197		7.861	0.345
	1.907	5.27		7.397	-0.22
	1.979	6.864		7.383	0.737
	1.675	3.69		7.006	2.389
	0.269	6.487		10.064	0.273
	1.081	5.951		6.817	3.882
	0.747	8.56		6.615	1.882
	0.225	4.733		7.122	1.403
	0.921	4.849		7.223	2.911
	0.602	5.197		7.513	-1.336
	3.428	11.096		7.325	0.099
	1.182	10.647		7.774	1.534
	0.675	4.965		5.368	-0.104
	-0.166	6.661		5.687	3.795
	2.399	4.603		6.672	0.288
	-1.064	7.835		8.615	-1.365
	2.24	7.458		7.933	-1.756
	0.153	3.139		7.252	0.563
	1.167	6.849		5.281	-2.046
	1.399	7.589		10.672	0.664
	3.675	6.69		8.542	-2.741
	0.965	6.328		6.383	0.041
	2.283	7.386		6.701	0.157
	0.037	3.487		7.209	-0.886
	0.559	9.197		6.542	-0.205
	0.037	6.531		6.658	2.143
	-0.224	5.11		5.977	-0.597
	1.733	8.864		8.948	1.447
	-0.079	7.647		8.455	2.882
	1.472	5.777		8.658	-0.655
	0.82	7.168		4.977	1.679
	2.892	3.56		7.064	3.012
	0.834	5.893		5.687	-1.002
	-0.079	4.791		8.47	1.78
	2.588	7.139		7.093	2.969
	0.82	7.487		10.948	-0.684
	3.211	8.444		6.035	-0.292
	0.298	6.183		5.861	0.853
	2.428	4.516		6.774	-0.973
	0.486	5.922		7.441	0.476
	1.979	5.009		8.252	1.534
	0.023	4.632		6.687	1.519
	1.834	6.531		6.672	-0.234
	3.095	8.081		7.484	1.403
	1.863	12.299		6.252	2.998
	0.414	7.733		4.933	2.751
	1.081	8.791		10.151	-1.365
	1.472	6.907		6.832	-0.553
	3.66	4.531		5.339	0.853
	1.023	9.748		6.759	0.896
	2.994	6.936		6.933	0.244
	0.95	5.009		10.151	-1.959
	0.907	6.878		6.643	2.867
	0.283	7.502		5.629	-0.002
	0.312	4.719		5.817	0.563
	0.196	7.907		6.484	1.882
	0.486	3.342		8.528	-0.292
	-0.34	7.661		6.281	1.056
	2.66	4.125		7.18	1.751
	0.689	8.096		9.615	1.577
	2.689	7.589		7.832	0.751
	1.167	4.154		8.049	-0.089
	1.631	8.502		8.136	2.447
	2.95	5.98		5.064	-0.263
	4.298	7.603		10.658	0.447
	0.211	5.603		6.919	1.954
	2.254	3.907		5.571	1.273
	-0.76	5.183		6.643	2.331
	0.863	8.11		5.441	-3.263
	1.805	9.038		8.803	0.331
	0.501	7.009		4.933	-1.944
	0.704	7.487		6.035	1.273
	1.791	7.473		9.223	3.94
	0.849	6.313		6.354	2.186
	0.82	6.806		4.122	-0.901
	1.37	6.516		7.701	2.853
	2.718	9.733		5.238	-0.959
	1.965	4.212		7.759	0.418
	1.95	11.487		5.339	0.389
	1.457	4.965		6.122	1.65
	2.559	5.835		6.875	0.432
	0.704	4.835		6.557	0.027
	1.457	8.704		6.136	1.563
	2.965	8.27		7.426	4.896
	1.066	8.197		5.499	-0.582
	-0.833	5.067		6.252	0.461
	-0.789	4.603		7.18	0.273
	0.501	7.154		6.281	0.143
	0.994	9.067		5.6	-0.959
	2.254	6.125		7.18	-1.785
	2.428	8.023		6.643	-1.176
	-0.398	5.661		4.745	0.186
	2.588	11.009		7.194	0.867
	1.762	3.733		4.977	0.172
	2.138	6.791		4.339	1.215
	0.791	2.589		6.397	3.259
	0.385	6.154		3.6	2.563
	-0.34	4.893		7.455	2.085
	1.182	8.487		6.252	1.36
	-0.137	6.719		5.455	1.345
	0.617	8.241		4.774	1.418
	1.486	5.458		3.89	1.259
	-0.267	7.69		4.788	3.606
	2.472	6.11		6.571	1.853
	3.008	7.574		6.484	-0.741
	1.341	5.458		5.339	0.374
	0.776	8.849		5.049	-1.539
	-1.064	6.081		5.165	-1.466
	2.617	8.038		6.296	1.447
	1.225	8.603		4.223	0.534
	2.11	5.487		4.6	1.201
	0.124	7.357		5.02	-0.002
	-1.18	3.878		4.194	-0.93
	-0.557	6.313		3.643	1.403
	1.66	9.139		3.02	0.128
	1.443	6.125		4.629	0.302
	0.254	7.733		4.6	-0.292
	1.356	5.965		5.194	0.519
	1.979	4.98		5.962	1.288
	0.472	8.502		4.6	-1.901
	2.066	8.139		2.441	2.476
	0.167	5.864		3.18	2.041
	1.283	10.125		2.962	-1.495
	-0.137	4.762		5.383	1.505
	-0.296	5.125		5.643	-0.785
	2.066	7.038		5.383	-0.756
	-0.746	7.589		4.049	1.302
	0.443	7.98		4.151	1.374
	3.167	5.922		3.412	0.505
	-0.702	6.864		5.383	1.099
	0.907	6.704		6.122	1.882
	1.733	5.676		6.774	-0.828
	0.704	8.313		3.267	-1.712
	2.182	8.893		5.933	-0.655
	0.167	6.618		5.745	-0.495
	0.283	5.342		4.991	0.809
	0.559	3.806		4.209	2.925
	0.733	6.893		6.426	0.751
	1.24	5.197		6.151	-0.828
	-0.253	5.11		5.252	2.896
	1.11	7.371		4.73	-0.452
	-0.021	6.69		6.861	3.461
	1.472	9.748		5.716	1.679
	1.37	3.255		6.078	2.461
	2.414	9.284		5.687	-0.626
	2.443	7.618		5.122	0.621
	3.153	6.69		3.165	0.316
	0.283	1.444		4.397	1.969
	1.385	5.98		3.18	1.49
	1.849	4.11		4.078	1.954
	0.573	7.386		5.672	3.157
	0.11	5.661		2.962	1.911
	-0.789	3.168		-1.052	3.998
	2.414	6.096		0.701	-0.51
	1.138	4.212		5.412	0.679
	2.37	4.531		0.89	5.679
	2.081	7.415		-1.646	2.766
	2.037	7.56		-0.125	3.969
	2.341	6.386		-0.023	6.476
	1.892	7.197		6.194	2.114
	-0.876	9.255		4.397	1.273
	2.646	5.936		6.933	0.78
	2.341	8.313		4.47	-0.64
	1.776	7.777		6.006	0.592
	3.53	7.676		6.165	0.751
	-0.296	6.806		5.296	2.577
	1.82	8.878		4.151	0.041
	0.066	5.27		6.73	0.534
	0.907	4.69		3.962	-1.452
	2.689	7.11		4.586	2.201
	1.762	6.212		4.455	1.128
	2.196	7.82		3.629	-0.466
	1.689	7.197		4.6	2.172
	2.341	6.299		6.571	1.795
	4.24	7.878		6.948	0.911
	1.356	7.429		6.238	1.94
	0.515	7.574		4.151	1.345
	0.805	5.139		3.339	0.143
	0.312	5.82		3.484	0.94
	0.631	5.545		0.846	5.795
	2.646	7.951		0.209	5.316
	0.863	4.052		1.238	3.911
	1.486	8.284		0.426	6.316
	-0.919	9.429		2.861	6.215
	0.892	5.762		-0.328	4.954
	0.037	4.444		2.165	4.867
	0.965	8.328		1.252	4.664
	0.515	9.038		1.151	3.114
	2.037	5.139		0.339	4.606
	-0.238	5.487		3.209	6.911
	0.733	9.067		1.832	6.78
	0.225	6.342		1.875	6.563
	2.008	5.386		1.049	7.838
	0.878	1.951		0.31	6.867
	2.443	6.951		1.875	6.259
	-0.746	4.647		0.499	4.288
	1.863	5.081		-0.212	4.041
	2.066	6.98		0.6	7.345
	0.327	2.922		2.02	5.969
	1.254	3.27		0.151	8.316
	1.66	4.82		-1.675	-0.394
	1.907	4.4		3.383	2.998
	3.023	5.835		2.02	5.23
	2.167	7.603		2.542	0.693
	0.892	7.299		0.716	3.345
	-0.398	3.386		1.991	7.085
	3.805	4.835		1.165	3.621
	1.24	6.849		2.18	1.664
	1.138	8.791		-1.096	4.867
	0.11	3.502		3.325	6.896
	0.095	6.864		1.136	3.78
	-0.441	6.096		2.846	6.114
	0.37	7.618		2.136	7.664
	1.283	4.603		4.296	6.143
	2.82	3.386		1.658	3.911
	1.878	2.647		0.672	6.389
	1.588	5.226		-0.733	2.389
	1.081	6.632		1.846	6.128
	0.211	5.458		-0.038	5.128
	1.544	5.284		2.368	3.969
	1.776	7.212		1.774	4.418
	1.965	3.081		0.165	2.78
	0.138	3.487		1.73	1.693
	-0.673	5.4		8.339	-1.698
	1.443	5.052		5.586	-0.147
	-1.441	3.299		6.397	1.331
	0.573	5.081		6.18	2.708
	0.457	4.081		5.643	1.201
	0.153	2.647		8.064	0.592
	0.762	6.733		5.672	1.447
	2.559	5.878		7.803	-1.104
	-0.209	5.618		8.194	1.215
	1.269	5.864		6.238	0.577
	-0.209	2.965		5.615	-1.655
	3.24	5.328		5.499	-0.452
	1.617	6.907		6.035	-1.147
	0.124	5.473		5.817	-1.481
	0.646	5.531		5.817	1.722
	1.95	8.56		5.542	-0.669
	1.327	7.27		5.73	0.867
	1.602	7.038		5.064	0.215
	3.052	9.183		6.296	-0.205
	0.892	5.168		7.991	0.635
	0.11	6.632		5.47	0.954
	1.138	7.313		6.064	-0.524
	-0.05	7.429		7.658	0.505
	1.718	7.067		8.89	0.476
	0.602	7.82		6.745	-0.799
	3.283	9.589		8.47	1.143
	0.936	9.371		9.571	0.635
	2.53	10.603		6.962	2.23
	-0.253	5.589		6.252	-0.292
	4.457	7.197		3.832	-3.162
	2.269	7.922		6.252	1.056
	1.936	8.212		8.252	0.679
	1.037	6.951		7.499	1.998
	2.023	9.936		6.557	0.809
	1.907	5.574		6.904	3.65
	2.791	11.197		9.223	-0.756
	1.675	7.473		5.412	1.172
	2.167	6.647		6.18	-0.959
	2.936	4.4		5.701	-1.336
	0.081	6.11		2.629	0.606
	-1.398	4.371		6.788	0.041
	0.631	5.762		5.064	0.606
	0.936	6.183		4.339	-2.466
	0.544	10.487		5.643	2.056
	1.863	7.313		5.252	1.838
	1.646	7.226		4.571	-1.77
	0.849	8.965		2.672	-1.466
	3.356	8.11		6.107	-1.51
	-0.847	2.994		6.832	-0.162
	2.646	7.168		3.093	-0.423
	-0.615	10.357		6.629	-0.089
	-0.267	6.197		7.02	1.302
	-0.238	2.82		5.238	1.172
	1.921	9.342		3.354	0.172
	-0.064	5.893		5.571	-2.017
	1.776	6.748		4.47	-0.452
	0.457	8.009		3.701	-0.408
	-0.137	10.255		5.412	1.288
	-1.847	7.806		6.832	1.099
	1.863	11.806		5.267	-0.814
	-0.89	6.791		5.875	0.664
	0.312	8.139		5.035	-0.307
	-0.746	9.168		6.441	3.215
	2.82	7.154		3.861	-0.712
	2.081	6.241		6.252	3.259
	1.254	7.125		5.89	-0.205
	1.225	8.487		7.672	3.824
	0.182	6.56		7.499	0.418
	0.805	6.342		4.513	0.737
	2.82	7.415		6.455	-0.249
	1.167	7.56		8.006	3.722
	0.878	6.27		7.238	1.128
	2.052	3.458		8.31	2.432
	2.472	8.922		7.672	0.925
	1.138	4.154		7.325	1.853
	-0.383	6.328		5.165	0.635
	2.486	4.878		9.832	1.476
	1.428	2.806		5.513	1.027
	0.878	9.965		7.817	2.041
	0.153	3.183		8.629	1.49
	1.138	3.748		6.557	3.085
	1.82	4.965		7.383	2.056
	-0.659	6.444		7.426	-1.379
	1.501	5.313		6.383	0.679
	0.008	7.009		7.122	-0.408
	1.646	8.704		6.18	-1.872
	0.457	6.951		8.02	-1.075
	-0.209	7.589		3.861	2.186
	1.776	6.545		5.528	1.519
	2.921	3.27		4.107	0.476
	2.399	8.487		3.093	0.114
	0.53	7.096		4.904	0.809
	0.283	2.4		5.788	1.737
	0.805	8.197		5.528	-0.988
	1.269	7.313		2.528	-1.336
	1.081	6.357		5.078	-0.075
	-0.688	5.183		3.832	-0.669
	3.414	6.4		4.354	0.563
	0.718	7.777		3.919	-1.843
	1.66	8.589		4.687	0.824
	-0.499	2.183		4.499	-0.06
	0.704	7.748		5.194	-1.089
	1.515	6.516		6.281	-0.22
	2.167	4.965		2.745	1.49
	-0.514	5.762		2.861	-1.278
	-0.296	4.11		2.18	1.766
	0.544	4.719		4.151	0.302
	0.428	5.647		6.499	1.606
	1.008	5.531		4.933	0.867
	0.138	8.342		2.875	-1.191
	1.095	8.965		3.02	0.07
	0.675	6.806		6.615	-0.452
	2.66	5.704		5.194	-0.741
	0.805	10.415		8.571	-0.133
	-1.586	4.733		5.035	0.027
	1.53	3.11		6.107	0.737
	-1.224	6.98		6.557	1.418
	0.298	7.69		2.803	-1.64
	1.196	5.878		3.238	0.693
	1.733	6.733		4.701	0.259
	-0.282	6.342		6.165	-1.915
	1.283	5.212		4.919	2.432
	0.501	10.096		5.136	2.795
	0.559	6.762		5.165	0.969
	1.588	4.632		5.455	0.693
	0.82	9.009		5.412	0.577
	0.617	7.241		6.774	-0.118
	1.399	8.328		6.209	-1.51
	3.283	7.009		5.629	1.056
	1.283	5.733		0.904	6.94
	-0.644	5.429		-0.69	6.07
	0.515	9.56		0.643	5.041
	2.747	7.907		0.629	4.751
	0.82	6.125		0.615	8.302
	-1.673	2.676		1.455	7.78
	-0.079	5.82		1.904	7.693
	-0.717	7.429		2.194	3.838
	0.573	7.154		-0.878	4.099
	-1.093	6.618		-1.052	4.403
	1.008	7.139		0.846	3.099
	0.747	6.212		0.412	4.737
	1.254	10.139		2.122	7.461
	1.965	7.907		3.542	7.157
	0.559	4.313		1.571	3.244
	0.066	7.023		0.774	3.94
	1.805	6.357		-0.646	4.186
	0.283	7.574		2.47	4.954
	1.457	5.27		-0.588	6.954
	0.008	4.212		3.078	4.041
	1.791	6.27		-0.661	4.954
	1.037	5.603		0.933	4.621
	-0.253	4.545		-1.096	5.302
	0.182	2.733		0.875	5.172
	2.37	10.487		-0.052	2.998
	0.312	2.429		1.629	6.722
	1.283	7.748		0.89	4.606
	-0.064	6.009		0.281	5.664
	1.269	5.907		0.441	4.766
	1.544	5.632		-0.154	4.882
	0.196	6.473		0.397	4.838
	-0.804	5.284		2.861	5.36
	0.53	1.299		1.528	6.23
	-0.354	4.487		5.615	5.65
	0.66	5.357		6.093	0.751
	0.747	7.516		4.18	0.085
	2.269	7.241		5.745	2.114
	1.631	4.922		7.194	1.882
	1.863	3.907		3.296	-0.481
	0.849	5.067		4.383	0.911
	1.24	3.139		4.426	0.041
	-1.079	4.603		4.701	0.853
	-0.05	10.762		3.426	-1.452
	0.53	5.429		5.325	-0.93
	2.399	5.676		2.875	-0.263
	1.138	7.531		4.064	2.288
	2.153	5.791		4.6	1.548
	0.312	8.835		5.397	0.085
	1.254	5.806		8.006	-0.77
	2.428	6.661		4.209	-0.234
	0.849	5.864		3.991	1.128
	1.776	2.806		3.759	2.548
	1.414	5.56		5.542	-0.611
	0.327	4.589		4.383	0.592
	0.052	7.226		5.107	0.172
	-0.76	6.212		2.557	-1.205
	0.457	6.299		2.788	0.316
	1.37	4.806		2.658	-0.292
	0.834	6.342		3.643	0.432
	1.501	7.067		5.368	1.157
	1.747	7.125		2.426	1.679
	1.472	4.878		4.194	1.563
	1.066	10.023		1.948	-1.35
	-0.267	6.806		5.73	0.693
	2.066	10.023		4.759	0.07
	0.486	3.241		6.455	0.969
	1.138	6.69		4.73	-0.872
	-0.325	6.733		4.73	-2.234
	1.327	7.574		4.093	-1.263
	-0.108	5.661		5.759	1.259
	0.994	7.052		4.31	2.519
	1.472	4.777		4.586	0.418
	0.153	8.096		3.977	0.577
	1.515	4.313		6.977	3.461
	0.124	4.11		3.281	0.215
	1.965	6.748		3.136	-0.423
	2.182	10.386		3.615	-1.002
	0.153	9.096		6.252	2.099
	-0.847	10.603		4.078	2.143
	-0.166	2.791		6.745	0.563
	0.081	4.864		1.687	-0.089
	1.486	3.27		4.267	0.085
	2.211	9.052		6.499	1.49
	1.196	5.023		3.078	5.635
	1.414	4.661		1.035	6.23
	0.356	5.907		2.31	7.215
	1.124	4.589		1.296	5.027
	-1.093	1.719		1.006	5.288
	2.167	9.038		0.267	7.606
	1.211	6.241		-0.4	2.577
	2.428	7.922		-1.835	3.809
	-1.528	5.009		0.89	1.969
	-0.369	10.081		1.513	4.592
	-0.325	4.56		0.788	5.331
	1.501	9.386		1.339	3.186
	-0.789	7.487		1.499	4.201
	1.762	5.342		1.643	5.577
	1.081	4.56		3.107	3.969
	-1.021	5.647		0.962	3.925
	0.892	5.502		0.788	3.201
	0.675	4.647		1.861	6.969
	-0.137	6.835		1.02	5.389
	1.559	7.574		4.977	0.635
	1.704	6.864		0.875	6.824
	2.515	5.69		1.73	4.94
	-0.325	6.313		2.078	4.693
	1.762	3.545		-0.458	4.331
	0.791	6.328		4.354	7.751
	2.196	6.255		-0.009	6.998
	1.559	4.4		2.064	2.664
	-0.05	10.444		1.238	2.708
	0.631	7.284		1.006	1.621
	1.907	7.574		0.991	3.157
	1.689	4.632		1.049	4.853
	0.167	6.531		2.281	6.635
	1.225	6.545		2.151	6.94
	1.762	9.081		-0.487	4.664
	1.646	7.502		0.832	4.882
	0.936	9.82		1.31	4.737
	-0.34	4.284		1.18	4.49
	-0.282	6.444		0.223	1.577
	2.863	8.791		0.31	2.172
	-0.137	11.893		-0.443	5.027
	2.356	7.168		1.368	6.766
	0.631	6.878		1.977	5.389
	0.704	6.762		0.455	1.374
	0.443	5.386		0.948	1.911
	-0.76	8.516		1.397	4.998
	0.211	8.284		0.919	5.07
	-0.035	4.168		-0.11	3.737
	1.341	6.936		2.223	6.418
	-0.238	8.603		1.557	3.085
	-0.021	7.009		-1.299	5.896
	-0.427	6.11		0.919	6.418
	1.254	5.98		1.354	5.389
	1.414	7.081		1.846	4.519
	1.341	3.69		2.006	5.403
	-0.224	3.98		2.267	5.925
	0.211	6.313		1.47	4.49
	0.095	2.936		1.064	3.201
	0.791	9.284		-0.704	3.693
	0.617	9.733		2.31	6.853
	2.907	11.096		-1.197	3.461
	-1.557	7.951		0.948	6.215
	0.95	7.893		1.136	5.708
	-0.804	4.791		-0.27	3.172
	1.211	5.777		1.209	2.65
	-0.224	5.371		3.484	2.389
	-1.673	6.878		-0.009	4.331
	0.965	6.907		1.643	4.085
	0.559	4.284		-0.371	3.476
	1.356	4.255		0.861	5.288
	2.994	3.574		1.006	6.882
	0.283	3.936		0.035	6.215
	1.37	6.936		-0.168	4.505
	1.008	7.154		0.991	3.389
	2.559	7.342		0.035	7.403
	-0.586	4.386		1.542	6.041
	-0.659	7.183		-1.168	5.809
	0.414	9.154		1.426	4.606
	-0.499	3.878		2.049	6.273
	0.153	3.951		1.31	5.012
	2.095	4.444		2.035	5.925
	-1.311	3.835		1.209	4.998
	0.225	6.676		2.557	5.621
	0.515	7.429		1.064	7.331
	1.82	7.052		2.296	4.824
	0.081	8.704		0.513	6.128
	1.211	7.154		0.861	3.114
	1.052	5.56		0.615	4.867
	0.037	6.241		1.832	7.143
	1.023	7.284		-0.11	7.606
	2.327	5.965		2.035	1.621
	-0.702	7.241		2.803	-0.423
	1.254	4.589		1.325	-1.568
	-0.47	7.849		-0.487	5.201
	2.704	11.342		1.687	6.824
	1.037	1.197		-0.849	4.911
	0.979	7.762		-1.719	4.201
	0.182	7.487		1.687	3.114
	1.82	6.878		3.049	5.882
	7.008	3.313		6.89	0.722
	7.892	-2.006		3.542	-0.176
	7.196	-0.875		3.339	0.853
	5.573	-1.122		3.875	-0.22
	8.776	0.125		7.426	1.954
	9.878	2.415		3.296	-0.684
	6.805	3.125		7.6	1.461
	7.979	1.4		-0.009	5.302
	4.646	0.487		2.643	3.23
	7.53	3.255		3.933	-0.698
	7.37	0.328		6.803	3.23
	6.631	-1.629		1.658	0.78
	3.327	0.125		3.368	2.664
	7.443	1.531		1.238	4.461
	7.327	2.183		2.948	5.592
	8.023	0.415		-1.052	1.505
	8.617	1.922		0.18	6.128
	6.515	-1.948		1.223	5.751
	8.298	0.4		1.339	3.143
	7.486	0.864		2.064	5.969
	8.53	-0.411		1.542	7.418
	10.994	0.98		-0.458	5.186
	8.66	0.371		-0.458	2.998
	9.124	-1.151		1.035	2.925
	5.878	-0.672		0.006	3.186
	9.501	0.313		-0.443	5.041
	8.907	0.864		1.31	5.476
	8.211	-2.209		1.325	3.998
	8.559	-1.803		0.354	8.389
	10.544	-0.643		-0.081	3.534
	7.559	0.371		0.89	5.07
	10.312	-1.629		1.571	3.418
	3.689	-3.353		1.31	6.751
	5.733	0.125		-0.11	3.679
	2.805	-5.339		1.759	4.998
	6.124	0.444		-0.545	4.693
	5.008	0.313		1.107	4.824
	7.124	1.386		0.774	3.548
	6.153	1.023		0.73	4.215
	8.385	2.806		0.904	0.577
	3.805	-0.44		0.948	7.374
	6.327	-2.614		0.136	3.664
	6.385	0.038		0.339	5.027
	6.037	-1.919		-0.183	4.476
	6.776	1.11		1.861	6.041
	5.443	-0.035		0.919	3.215
	4.617	-1.542		0.136	4.737
	7.052	-0.73		2.977	6.201
	2.718	-2.484		0.788	3.954
	6.979	0.067		0.238	3.969
	6.066	0.212		0.557	5.215
	5.472	0.415		0.89	3.49
	6.921	-1.107		1.194	3.867
	7.052	-0.136		0.31	5.027
	3.718	-0.745		1.716	4.215
	7.776	0.458		0.339	5.78
	8.327	0.067		1.701	6.259
	7.24	0.936		2.803	0.592
	8.457	1.849		4.919	1.186
	5.399	2.052		1.151	-0.379
	8.356	-0.919		2.455	4.302
	12.24	0.69		-0.342	-0.35
	-0.485	-1.73		-0.038	6.288
	-1.122	-2.382		1.354	1.824
	-1.499	0.357		2.571	5.505
	1.602	-2.788		2.078	2.635
	-0.224	-0.107		0.745	4.766
	-0.499	0.69		2.412	2.577
	0.37	-1.078		0.919	7.403
	0.138	0.023		-1.487	5.969
	-1.499	-0.745		1.078	6.621
	0.994	-1.165		0.817	6.621
	-0.224	-1.324		2.904	5.679
	-0.108	-1.049		1.194	7.708
	0.341	-2.672		0.049	1.577
	0.791	-0.658		0.165	3.896
	-0.514	-1.02		0.73	3.07
	0.211	-2.672		0.238	3.563
	0.921	-2.803		1.629	7.389
	-1.615	-1.31		0.6	3.418
	0.689	0.849		1.658	4.751
	-0.514	-0.035		0.006	5.056
	-1.035	1.618		6.107	2.418
	-0.021	1.154		2.803	-0.51
	0.515	1.922		4.904	-0.886
	0.762	0.038		3.513	-3.046
	-0.804	0.487		6.412	0.07
	-0.789	2.545		4.542	-0.64
	0.023	-0.498		7.122	-0.379
	1.225	2.212		4.672	-0.582
	-0.412	-0.267		3.441	1.273
	0.892	-1.788		2.759	-0.959
	0.994	0.096		5.194	1.853
	1.602	0.226		6.542	-1.147
	0.066	-0.527		2.238	3.201
	0.472	0.27		-0.139	4.012
	-0.557	-0.716		0.006	3.519
	-0.514	-0.933		1.035	7.432
	-1.688	-1.817		1.528	3.795
	0.341	1.661		0.339	5.94
	-1.833	0.009		3.223	6.345
	-0.702	0.444		1.02	2.983
	-1.122	-2.469		1.586	2.461
	0.153	-0.035		0.904	5.302
	-1.253	-1.571		1.252	5.157
