# Supplementary material for: Kinetic regulation of kinesin’s two motor domains coordinates its stepping along microtubules
Source: eLife. 2025 Apr 17;14:RP106228. doi: 10.7554/eLife.106228 (PMC12005725; doi:10.7554/eLife.106228)
Supplement: Figure 6—source data 1. [file elife-106228-fig6-data1.xlsx]

## Sheet: Sheet1
Detachment rate		E236A-WT heterodimer		Fig.6D
G0
ATP conc			inv tau	sem
5	8	42	0.86121	0.0939
10	8	50	0.94208	0.0717
20	7	78	2.2005	0.0743
50	8	132	3.357	0.104
200	11	279	4.8909	0.329
1000	16	392	6.1887	0.397
G7
ATP conc			inv tau	sem
10	13	197	3.0454	0.128
1000	10	199	7.0057	0.347
5	3	25	2.5848	0.114
20	4	32	4.032	0.252
50	10	159	4.3839	0.309
200	5	121	7.9313	0.242
G12
ATP conc			inv tau	sem
1	5	28	1.3399	0.157
5	11	114	2.9574	0.16
10	18	415	7.1043	0.306
20	7	121	6.9307	0.322
50	15	379	8.29	0.384
1000	10	317	8.9903	0.422
